# Supplementary material for: Assessment of the impact of using Ammonia-Hydrogen fuel blend in a diffusion combustor: A numerical approach
Source: Research Square preprint supplement (doi:10.21203/rs.3.rs-7960312/v1), 2025-11-25
Supplement: Supplementary file 1 [file 21de70aeffa30abd118d64b0.xlsx]

## Sheet: Axial temp distribution
SN 0			SN 0.2			SN 0.4			SN 0.6			SN 0.8			SN 1
Axial distance	temperature		Axial distance	temperature		Axial distance	temperature		Axial distance	temperature		Axial distance	temperature		Axial distance	temperature
0.00115113	326.854		0.00115113	327.002		0.00115113	327.174		0.00115113	324.311		0.00115113	322.399		0.00115113	322.918
0.00404502	337.683		0.00404502	337.84		0.00404502	337.78		0.00404502	334.775		0.00404502	332.712		0.00404502	333.498
0.00693891	349.14		0.00693891	349.31		0.00693891	349.137		0.00693891	346.411		0.00693891	344.586		0.00693891	345.659
0.0098328	360.562		0.0098328	360.754		0.0098328	360.602		0.0098328	358.529		0.0098328	357.248		0.0098328	358.542
0.0127267	371.555		0.0127267	371.771		0.0127267	371.676		0.0127267	370.591		0.0127267	369.897		0.0127267	371.292
0.0156206	381.919		0.0156206	382.103		0.0156206	382.082		0.0156206	382.086		0.0156206	381.919		0.0156206	383.307
0.0185145	391.627		0.0185145	391.742		0.0185145	391.711		0.0185145	392.724		0.0185145	392.994		0.0185145	394.114
0.0214084	400.707		0.0214084	400.737		0.0214084	400.604		0.0214084	402.459		0.0214084	402.929		0.0214084	403.52
0.0243023	409.194		0.0243023	409.111		0.0243023	408.881		0.0243023	411.265		0.0243023	411.638		0.0243023	411.748
0.0271961	417.146		0.0271961	416.967		0.0271961	416.632		0.0271961	419.373		0.0271961	419.214		0.0271961	418.92
0.03009	424.63		0.03009	424.332		0.03009	423.894		0.03009	426.778		0.03009	425.97		0.03009	425.03
0.0329839	431.726		0.0329839	431.283		0.0329839	430.74		0.0329839	433.809		0.0329839	432.156		0.0329839	430.772
0.0358778	438.469		0.0358778	437.921		0.0358778	437.255		0.0358778	441.048		0.0358778	438.604		0.0358778	436.492
0.0387717	444.915		0.0387717	444.243		0.0387717	443.45		0.0387717	449.494		0.0387717	446.593		0.0387717	442.106
0.0416656	451.132		0.0416656	450.322		0.0416656	449.431		0.0416656	461.833		0.0416656	457.685		0.0416656	448.335
0.0445595	457.161		0.0445595	456.252		0.0445595	455.303		0.0445595	483.816		0.0445595	476.965		0.0445595	456.088
0.0474534	463.053		0.0474534	462.053		0.0474534	461.127		0.0474534	527.469		0.0474534	515.19		0.0474534	467.996
0.0503473	468.825		0.0503473	467.776		0.0503473	467.021		0.0503473	617.405		0.0503473	592.946		0.0503473	489.792
0.0532412	474.516		0.0532412	473.439		0.0532412	472.97		0.0532412	782.118		0.0532412	739.55		0.0532412	532.546
0.056135	480.172		0.056135	479.056		0.056135	479.849		0.056135	1017.75		0.056135	961.134		0.056135	617.174
0.0590289	485.79		0.0590289	484.632		0.0590289	489.419		0.0590289	1257.82		0.0590289	1201.6		0.0590289	766.458
0.0619228	491.376		0.0619228	490.2		0.0619228	505.34		0.0619228	1413.73		0.0619228	1366.9		0.0619228	978.212
0.0648167	496.985		0.0648167	495.79		0.0648167	536.45		0.0648167	1452.78		0.0648167	1410.26		0.0648167	1201.66
0.0677106	502.62		0.0677106	501.421		0.0677106	598.072		0.0677106	1417.53		0.0677106	1375.39		0.0677106	1359.47
0.0706045	508.299		0.0706045	507.11		0.0706045	706.884		0.0706045	1363.86		0.0706045	1324.52		0.0706045	1409.83
0.0734984	514.064		0.0734984	512.879		0.0734984	866.505		0.0734984	1313.5		0.0734984	1280.03		0.0734984	1384.77
0.0763923	519.917		0.0763923	518.761		0.0763923	1061.16		0.0763923	1269.97		0.0763923	1245.17		0.0763923	1340.66
0.0792862	525.875		0.0792862	524.748		0.0792862	1259.67		0.0792862	1233.14		0.0792862	1218.29		0.0792862	1301.35
0.0821801	531.945		0.0821801	530.878		0.0821801	1428.11		0.0821801	1202.1		0.0821801	1197.12		0.0821801	1270.07
0.085074	538.152		0.085074	537.182		0.085074	1545.56		0.085074	1176.28		0.085074	1180.06		0.085074	1245.87
0.085074	538.152		0.085074	537.182		0.085074	1545.56		0.085074	1176.28		0.085074	1180.06		0.085074	1245.87
0.0879678	544.513		0.0879678	543.671		0.0879678	1605.57		0.0879678	1155		0.0879678	1166.03		0.0879678	1227.04
0.0908617	551.038		0.0908617	550.367		0.0908617	1612.12		0.0908617	1137.3		0.0908617	1154.57		0.0908617	1212.23
0.0937556	557.744		0.0937556	557.285		0.0937556	1579.74		0.0937556	1122.56		0.0937556	1145.35		0.0937556	1200.51
0.0966495	564.646		0.0966495	564.448		0.0966495	1527.62		0.0966495	1110.39		0.0966495	1137.93		0.0966495	1191.26
0.0995434	571.754		0.0995434	571.873		0.0995434	1469.38		0.0995434	1100.36		0.0995434	1131.98		0.0995434	1184.03
0.102437	579.08		0.102437	579.568		0.102437	1412.9		0.102437	1092.11		0.102437	1127.25		0.102437	1178.41
0.105331	586.629		0.105331	587.53		0.105331	1361.31		0.105331	1085.37		0.105331	1123.49		0.105331	1174.07
0.108225	594.4		0.108225	595.751		0.108225	1315.3		0.108225	1079.87		0.108225	1120.55		0.108225	1170.71
0.111119	602.38		0.111119	604.249		0.111119	1275.25		0.111119	1075.41		0.111119	1118.29		0.111119	1168.08
0.114013	610.582		0.114013	613.044		0.114013	1240.52		0.114013	1071.85		0.114013	1116.54		0.114013	1166.06
0.116907	619.007		0.116907	622.107		0.116907	1210.56		0.116907	1069.01		0.116907	1115.2		0.116907	1164.54
0.119801	627.631		0.119801	631.412		0.119801	1184.81		0.119801	1066.77		0.119801	1114.16		0.119801	1163.37
0.122695	636.442		0.122695	640.941		0.122695	1162.72		0.122695	1065		0.122695	1113.33		0.122695	1162.46
0.125588	645.419		0.125588	650.678		0.125588	1143.68		0.125588	1063.6		0.125588	1112.68		0.125588	1161.73
0.128482	654.533		0.128482	660.594		0.128482	1127.15		0.128482	1062.5		0.128482	1112.13		0.128482	1161.13
0.131376	663.768		0.131376	670.511		0.131376	1112.77		0.131376	1061.62		0.131376	1111.68		0.131376	1160.61
0.13427	673.116		0.13427	680.572		0.13427	1100.21		0.13427	1060.92		0.13427	1111.27		0.13427	1160.16
0.137164	682.551		0.137164	690.952		0.137164	1089.18		0.137164	1060.35		0.137164	1110.91		0.137164	1159.75
0.140058	692.06		0.140058	701.495		0.140058	1079.44		0.140058	1059.88		0.140058	1110.57		0.140058	1159.36
0.142952	701.633		0.142952	712.141		0.142952	1070.8		0.142952	1059.48		0.142952	1110.25		0.142952	1158.99
0.145846	711.247		0.145846	722.855		0.145846	1063.1		0.145846	1059.13		0.145846	1109.95		0.145846	1158.63
0.14874	720.884		0.14874	733.626		0.14874	1056.21		0.14874	1058.82		0.14874	1109.65		0.14874	1158.27
0.151633	730.532		0.151633	744.459		0.151633	1050.01		0.151633	1058.53		0.151633	1109.36		0.151633	1157.91
0.154527	740.184		0.154527	755.346		0.154527	1044.42		0.154527	1058.27		0.154527	1109.06		0.154527	1157.55
0.157421	749.83		0.157421	766.28		0.157421	1039.37		0.157421	1058.01		0.157421	1108.77		0.157421	1157.19
0.160315	759.422		0.160315	777.248		0.160315	1034.79		0.160315	1057.76		0.160315	1108.47		0.160315	1156.82
0.163209	768.948		0.163209	788.243		0.163209	1030.64		0.163209	1057.51		0.163209	1108.17		0.163209	1156.45
0.166103	778.486		0.166103	799.272		0.166103	1026.85		0.166103	1057.27		0.166103	1107.87		0.166103	1156.07
0.166103	778.486		0.166103	799.272		0.166103	1026.85		0.166103	1057.27		0.166103	1107.87		0.166103	1156.07
0.168997	788.053		0.168997	810.332		0.168997	1023.4		0.168997	1057.02		0.168997	1107.57		0.168997	1155.69
0.171891	797.591		0.171891	821.417		0.171891	1020.24		0.171891	1056.78		0.171891	1107.26		0.171891	1155.3
0.174785	807.083		0.174785	832.525		0.174785	1017.35		0.174785	1056.53		0.174785	1106.95		0.174785	1154.91
0.177678	816.533		0.177678	843.655		0.177678	1014.7		0.177678	1056.28		0.177678	1106.63		0.177678	1154.51
0.180572	825.935		0.180572	854.811		0.180572	1012.26		0.180572	1056.03		0.180572	1106.31		0.180572	1154.11
0.183466	835.29		0.183466	865.99		0.183466	1010		0.183466	1055.77		0.183466	1105.99		0.183466	1153.69
0.18636	844.597		0.18636	877.195		0.18636	1007.9		0.18636	1055.52		0.18636	1105.66		0.18636	1153.28
0.189254	853.856		0.189254	888.428		0.189254	1005.96		0.189254	1055.25		0.189254	1105.33		0.189254	1152.86
0.192148	863.073		0.192148	899.683		0.192148	1004.14		0.192148	1054.99		0.192148	1104.99		0.192148	1152.43
0.195042	872.25		0.195042	910.974		0.195042	1002.44		0.195042	1054.72		0.195042	1104.65		0.195042	1151.99
0.197936	881.386		0.197936	922.313		0.197936	1000.84		0.197936	1054.45		0.197936	1104.3		0.197936	1151.55
0.20083	890.48		0.20083	933.71		0.20083	999.342		0.20083	1054.18		0.20083	1103.95		0.20083	1151.1
0.203723	899.531		0.203723	945.176		0.203723	997.924		0.203723	1053.9		0.203723	1103.59		0.203723	1150.64
0.206617	908.542		0.206617	956.739		0.206617	996.581		0.206617	1053.62		0.206617	1103.23		0.206617	1150.18
0.209511	917.515		0.209511	968.421		0.209511	995.308		0.209511	1053.33		0.209511	1102.86		0.209511	1149.71
0.212405	926.442		0.212405	980.215		0.212405	994.098		0.212405	1053.04		0.212405	1102.49		0.212405	1149.24
0.215299	935.319		0.215299	992.082		0.215299	992.946		0.215299	1052.75		0.215299	1102.11		0.215299	1148.76
0.215299	935.319		0.215299	992.082		0.215299	992.946		0.215299	1052.75		0.215299	1102.11		0.215299	1148.76
0.218193	944.154		0.218193	1004.01		0.218193	991.849		0.218193	1052.45		0.218193	1101.73		0.218193	1148.27
0.221087	952.958		0.221087	1016.02		0.221087	990.801		0.221087	1052.15		0.221087	1101.35		0.221087	1147.77
0.223981	961.734		0.223981	1028.11		0.223981	989.799		0.223981	1051.85		0.223981	1100.96		0.223981	1147.27
0.226875	970.488		0.226875	1040.29		0.226875	988.84		0.226875	1051.54		0.226875	1100.56		0.226875	1146.76
0.229768	979.223		0.229768	1052.54		0.229768	987.921		0.229768	1051.23		0.229768	1100.16		0.229768	1146.25
0.232662	987.948		0.232662	1064.87		0.232662	987.04		0.232662	1050.92		0.232662	1099.76		0.232662	1145.73
0.235556	996.66		0.235556	1077.29		0.235556	986.196		0.235556	1050.6		0.235556	1099.35		0.235556	1145.21
0.23845	1005.38		0.23845	1089.84		0.23845	985.387		0.23845	1050.28		0.23845	1098.93		0.23845	1144.67
0.241344	1014.13		0.241344	1102.54		0.241344	984.611		0.241344	1049.96		0.241344	1098.51		0.241344	1144.14
0.244238	1022.87		0.244238	1115.36		0.244238	983.867		0.244238	1049.64		0.244238	1098.09		0.244238	1143.59
0.247132	1031.63		0.247132	1128.33		0.247132	983.153		0.247132	1049.31		0.247132	1097.67		0.247132	1143.04
0.250026	1040.39		0.250026	1141.49		0.250026	982.468		0.250026	1048.97		0.250026	1097.23		0.250026	1142.49
0.25292	1049.17		0.25292	1154.87		0.25292	981.811		0.25292	1048.64		0.25292	1096.8		0.25292	1141.93
0.255814	1057.98		0.255814	1168.52		0.255814	981.181		0.255814	1048.3		0.255814	1096.36		0.255814	1141.36
0.258707	1066.83		0.258707	1182.4		0.258707	980.576		0.258707	1047.96		0.258707	1095.92		0.258707	1140.79
0.261601	1075.71		0.261601	1196.51		0.261601	979.995		0.261601	1047.62		0.261601	1095.47		0.261601	1140.21
0.264495	1084.62		0.264495	1210.9		0.264495	979.437		0.264495	1047.27		0.264495	1095.02		0.264495	1139.62
0.267389	1093.6		0.267389	1225.61		0.267389	978.902		0.267389	1046.92		0.267389	1094.56		0.267389	1139.03
0.270283	1102.64		0.270283	1240.58		0.270283	978.389		0.270283	1046.57		0.270283	1094.1		0.270283	1138.44
0.273177	1111.75		0.273177	1255.75		0.273177	977.895		0.273177	1046.22		0.273177	1093.64		0.273177	1137.84
0.276071	1120.95		0.276071	1271.16		0.276071	977.422		0.276071	1045.86		0.276071	1093.17		0.276071	1137.23
0.278965	1130.25		0.278965	1286.81		0.278965	976.967		0.278965	1045.5		0.278965	1092.7		0.278965	1136.62
0.281859	1139.67		0.281859	1302.7		0.281859	976.53		0.281859	1045.14		0.281859	1092.22		0.281859	1136
0.284752	1149.23		0.284752	1318.77		0.284752	976.11		0.284752	1044.77		0.284752	1091.74		0.284752	1135.38
0.287646	1158.93		0.287646	1334.98		0.287646	975.707		0.287646	1044.4		0.287646	1091.26		0.287646	1134.76
0.29054	1168.79		0.29054	1351.35		0.29054	975.319		0.29054	1044.03		0.29054	1090.77		0.29054	1134.12
0.293434	1178.8		0.293434	1367.98		0.293434	974.946		0.293434	1043.66		0.293434	1090.28		0.293434	1133.49
0.296328	1188.96		0.296328	1384.81		0.296328	974.588		0.296328	1043.29		0.296328	1089.78		0.296328	1132.85
0.299222	1199.24		0.299222	1401.78		0.299222	974.243		0.299222	1042.91		0.299222	1089.29		0.299222	1132.2
0.302116	1209.73		0.302116	1419.02		0.302116	973.911		0.302116	1042.53		0.302116	1088.78		0.302116	1131.55
0.30501	1220.43		0.30501	1436.62		0.30501	973.592		0.30501	1042.15		0.30501	1088.28		0.30501	1130.9
0.307904	1231.37		0.307904	1454.42		0.307904	973.284		0.307904	1041.77		0.307904	1087.77		0.307904	1130.24
0.310797	1242.57		0.310797	1472.34		0.310797	972.988		0.310797	1041.38		0.310797	1087.26		0.310797	1129.57
0.313691	1254.03		0.313691	1490.47		0.313691	972.702		0.313691	1040.99		0.313691	1086.74		0.313691	1128.9
0.313691	1254.03		0.313691	1490.47		0.313691	972.702		0.313691	1040.99		0.313691	1086.74		0.313691	1128.9
0.316585	1265.77		0.316585	1508.8		0.316585	972.426		0.316585	1040.6		0.316585	1086.23		0.316585	1128.23
0.319479	1277.8		0.319479	1527.35		0.319479	972.159		0.319479	1040.21		0.319479	1085.7		0.319479	1127.55
0.322373	1290.13		0.322373	1546.09		0.322373	971.901		0.322373	1039.81		0.322373	1085.18		0.322373	1126.87
0.325267	1302.8		0.325267	1564.99		0.325267	971.652		0.325267	1039.42		0.325267	1084.65		0.325267	1126.19
0.328161	1315.81		0.328161	1584.05		0.328161	971.41		0.328161	1039.02		0.328161	1084.12		0.328161	1125.5
0.331055	1329.19		0.331055	1603.22		0.331055	971.176		0.331055	1038.61		0.331055	1083.59		0.331055	1124.81
0.333949	1342.93		0.333949	1622.43		0.333949	970.949		0.333949	1038.21		0.333949	1083.05		0.333949	1124.11
0.336842	1357.16		0.336842	1641.64		0.336842	970.729		0.336842	1037.81		0.336842	1082.51		0.336842	1123.41
0.339736	1371.82		0.339736	1660.99		0.339736	970.515		0.339736	1037.4		0.339736	1081.96		0.339736	1122.71
0.34263	1386.9		0.34263	1680.46		0.34263	970.306		0.34263	1036.99		0.34263	1081.42		0.34263	1122
0.345524	1402.51		0.345524	1699.71		0.345524	970.103		0.345524	1036.58		0.345524	1080.87		0.345524	1121.29
0.348418	1418.59		0.348418	1718.68		0.348418	969.906		0.348418	1036.16		0.348418	1080.31		0.348418	1120.57
0.351312	1435.03		0.351312	1737.46		0.351312	969.712		0.351312	1035.75		0.351312	1079.76		0.351312	1119.86
0.354206	1451.84		0.354206	1755.98		0.354206	969.523		0.354206	1035.33		0.354206	1079.2		0.354206	1119.14
0.3571	1469.08		0.3571	1774.2		0.3571	969.338		0.3571	1034.91		0.3571	1078.64		0.3571	1118.42
0.359994	1486.75		0.359994	1792.08		0.359994	969.157		0.359994	1034.49		0.359994	1078.08		0.359994	1117.69
0.362887	1504.84		0.362887	1809.51		0.362887	968.979		0.362887	1034.06		0.362887	1077.51		0.362887	1116.96
0.365781	1523.32		0.365781	1826.62		0.365781	968.804		0.365781	1033.64		0.365781	1076.94		0.365781	1116.23
0.368675	1542.25		0.368675	1843.1		0.368675	968.631		0.368675	1033.21		0.368675	1076.37		0.368675	1115.5
0.371569	1561.51		0.371569	1858.59		0.371569	968.46		0.371569	1032.78		0.371569	1075.8		0.371569	1114.76
0.374463	1580.88		0.374463	1873.26		0.374463	968.291		0.374463	1032.35		0.374463	1075.22		0.374463	1114.03
0.377357	1600.41		0.377357	1886.71		0.377357	968.123		0.377357	1031.92		0.377357	1074.64		0.377357	1113.29
0.380251	1620.25		0.380251	1898.44		0.380251	967.956		0.380251	1031.49		0.380251	1074.06		0.380251	1112.54
0.383145	1640.22		0.383145	1907.66		0.383145	967.79		0.383145	1031.05		0.383145	1073.48		0.383145	1111.8
0.386039	1659.96		0.386039	1914.25		0.386039	967.624		0.386039	1030.61		0.386039	1072.9		0.386039	1111.05
0.388932	1679.39		0.388932	1918.62		0.388932	967.459		0.388932	1030.17		0.388932	1072.31		0.388932	1110.31
0.391826	1698.4		0.391826	1920.73		0.391826	967.293		0.391826	1029.73		0.391826	1071.72		0.391826	1109.56
0.39472	1717.18		0.39472	1920.71		0.39472	967.126		0.39472	1029.29		0.39472	1071.13		0.39472	1108.81
0.397614	1735.41		0.397614	1918.4		0.397614	966.958		0.397614	1028.84		0.397614	1070.54		0.397614	1108.06
0.400508	1752.52		0.400508	1914.02		0.400508	966.788		0.400508	1028.4		0.400508	1069.94		0.400508	1107.3
0.403402	1768.39		0.403402	1907.61		0.403402	966.617		0.403402	1027.95		0.403402	1069.35		0.403402	1106.55
0.403402	1768.39		0.403402	1907.61		0.403402	966.617		0.403402	1027.95		0.403402	1069.35		0.403402	1106.55
0.406296	1783.11		0.406296	1899.26		0.406296	966.444		0.406296	1027.5		0.406296	1068.75		0.406296	1105.8
0.40919	1795.74		0.40919	1889.46		0.40919	966.27		0.40919	1027.05		0.40919	1068.15		0.40919	1105.04
0.412084	1805.27		0.412084	1878.45		0.412084	966.093		0.412084	1026.6		0.412084	1067.55		0.412084	1104.28
0.414977	1812.11		0.414977	1866.49		0.414977	965.914		0.414977	1026.15		0.414977	1066.95		0.414977	1103.53
0.417871	1816.46		0.417871	1853.6		0.417871	965.733		0.417871	1025.69		0.417871	1066.34		0.417871	1102.77
0.420765	1818.28		0.420765	1839.79		0.420765	965.55		0.420765	1025.23		0.420765	1065.74		0.420765	1102.01
0.423659	1817.56		0.423659	1825.41		0.423659	965.365		0.423659	1024.78		0.423659	1065.13		0.423659	1101.25
0.426553	1814.45		0.426553	1810.36		0.426553	965.177		0.426553	1024.32		0.426553	1064.53		0.426553	1100.49
0.429447	1809.05		0.429447	1794.54		0.429447	964.987		0.429447	1023.86		0.429447	1063.92		0.429447	1099.73
0.432341	1801.78		0.432341	1778.32		0.432341	964.795		0.432341	1023.4		0.432341	1063.31		0.432341	1098.97
0.435235	1792.9		0.435235	1761.77		0.435235	964.601		0.435235	1022.93		0.435235	1062.7		0.435235	1098.22
0.438129	1782.58		0.438129	1744.9		0.438129	964.404		0.438129	1022.47		0.438129	1062.09		0.438129	1097.46
0.441023	1770.95		0.441023	1727.85		0.441023	964.205		0.441023	1022.01		0.441023	1061.48		0.441023	1096.7
0.443916	1758.06		0.443916	1710.61		0.443916	964.003		0.443916	1021.54		0.443916	1060.87		0.443916	1095.94
0.44681	1744.34		0.44681	1693.17		0.44681	963.799		0.44681	1021.07		0.44681	1060.26		0.44681	1095.18
0.449704	1729.82		0.449704	1675.7		0.449704	963.594		0.449704	1020.61		0.449704	1059.64		0.449704	1094.42
0.452598	1714.56		0.452598	1658.22		0.452598	963.385		0.452598	1020.14		0.452598	1059.03		0.452598	1093.67
0.455492	1698.87		0.455492	1640.68		0.455492	963.175		0.455492	1019.67		0.455492	1058.42		0.455492	1092.91
0.458386	1682.78		0.458386	1623.23		0.458386	962.963		0.458386	1019.19		0.458386	1057.8		0.458386	1092.15
0.46128	1666.3		0.46128	1605.93		0.46128	962.748		0.46128	1018.72		0.46128	1057.19		0.46128	1091.4
0.464174	1649.59		0.464174	1588.84		0.464174	962.531		0.464174	1018.25		0.464174	1056.57		0.464174	1090.64
0.467068	1632.73		0.467068	1571.9		0.467068	962.313		0.467068	1017.78		0.467068	1055.96		0.467068	1089.89
0.469961	1615.79		0.469961	1555.1		0.469961	962.092		0.469961	1017.3		0.469961	1055.34		0.469961	1089.14
0.472855	1598.82		0.472855	1538.54		0.472855	961.869		0.472855	1016.83		0.472855	1054.73		0.472855	1088.39
0.475749	1581.87		0.475749	1522.26		0.475749	961.645		0.475749	1016.35		0.475749	1054.11		0.475749	1087.64
0.478643	1564.95		0.478643	1506.26		0.478643	961.419		0.478643	1015.87		0.478643	1053.49		0.478643	1086.89
0.481537	1548.11		0.481537	1490.58		0.481537	961.19		0.481537	1015.4		0.481537	1052.88		0.481537	1086.14
0.484431	1531.38		0.484431	1475.22		0.484431	960.961		0.484431	1014.92		0.484431	1052.27		0.484431	1085.39
0.487325	1514.8		0.487325	1460.11		0.487325	960.729		0.487325	1014.44		0.487325	1051.65		0.487325	1084.65
0.490219	1498.44		0.490219	1445.29		0.490219	960.496		0.490219	1013.96		0.490219	1051.04		0.490219	1083.9
0.493113	1482.36		0.493113	1430.77		0.493113	960.262		0.493113	1013.48		0.493113	1050.42		0.493113	1083.16
0.496006	1466.54		0.496006	1416.55		0.496006	960.026		0.496006	1013		0.496006	1049.81		0.496006	1082.42
0.4989	1450.99		0.4989	1402.68		0.4989	959.788		0.4989	1012.52		0.4989	1049.2		0.4989	1081.68
0.501794	1435.79		0.501794	1389.17		0.501794	959.55		0.501794	1012.04		0.501794	1048.58		0.501794	1080.94
0.504688	1420.8		0.504688	1376.03		0.504688	959.31		0.504688	1011.56		0.504688	1047.97		0.504688	1080.21
0.507582	1405.99		0.507582	1363.28		0.507582	959.069		0.507582	1011.08		0.507582	1047.36		0.507582	1079.47
0.510476	1391.58		0.510476	1350.86		0.510476	958.826		0.510476	1010.6		0.510476	1046.75		0.510476	1078.74
0.51337	1377.57		0.51337	1338.8		0.51337	958.583		0.51337	1010.12		0.51337	1046.14		0.51337	1078.01
0.516264	1363.96		0.516264	1327.12		0.516264	958.339		0.516264	1009.64		0.516264	1045.53		0.516264	1077.28
0.519158	1350.69		0.519158	1315.81		0.519158	958.093		0.519158	1009.15		0.519158	1044.92		0.519158	1076.56
0.522051	1337.76		0.522051	1304.78		0.522051	957.846		0.522051	1008.67		0.522051	1044.32		0.522051	1075.83
0.524945	1325.16		0.524945	1294.03		0.524945	957.598		0.524945	1008.19		0.524945	1043.71		0.524945	1075.11
0.524945	1325.16		0.524945	1294.03		0.524945	957.598		0.524945	1008.19		0.524945	1043.71		0.524945	1075.11
0.527839	1312.86		0.527839	1283.58		0.527839	957.349		0.527839	1007.71		0.527839	1043.1		0.527839	1074.39
0.530733	1300.9		0.530733	1273.45		0.530733	957.099		0.530733	1007.23		0.530733	1042.5		0.530733	1073.67
0.533627	1289.27		0.533627	1263.62		0.533627	956.848		0.533627	1006.74		0.533627	1041.9		0.533627	1072.95
0.536521	1277.97		0.536521	1254.1		0.536521	956.596		0.536521	1006.26		0.536521	1041.29		0.536521	1072.24
0.539415	1267.01		0.539415	1244.86		0.539415	956.343		0.539415	1005.78		0.539415	1040.69		0.539415	1071.53
0.542309	1256.36		0.542309	1235.92		0.542309	956.09		0.542309	1005.3		0.542309	1040.09		0.542309	1070.82
0.545203	1246.02		0.545203	1227.25		0.545203	955.836		0.545203	1004.82		0.545203	1039.5		0.545203	1070.11
0.548096	1235.99		0.548096	1218.86		0.548096	955.581		0.548096	1004.34		0.548096	1038.9		0.548096	1069.41
0.55099	1226.27		0.55099	1210.73		0.55099	955.325		0.55099	1003.86		0.55099	1038.3		0.55099	1068.7
0.553884	1216.84		0.553884	1202.86		0.553884	955.069		0.553884	1003.38		0.553884	1037.71		0.553884	1068
0.556778	1207.73		0.556778	1195.26		0.556778	954.812		0.556778	1002.9		0.556778	1037.12		0.556778	1067.31
0.559672	1198.91		0.559672	1187.9		0.559672	954.554		0.559672	1002.42		0.559672	1036.53		0.559672	1066.61
0.562566	1190.36		0.562566	1180.79		0.562566	954.296		0.562566	1001.94		0.562566	1035.94		0.562566	1065.92
0.56546	1182.09		0.56546	1173.91		0.56546	954.037		0.56546	1001.46		0.56546	1035.35		0.56546	1065.23
0.568354	1174.1		0.568354	1167.25		0.568354	953.777		0.568354	1000.98		0.568354	1034.76		0.568354	1064.54
0.571248	1166.4		0.571248	1160.82		0.571248	953.517		0.571248	1000.5		0.571248	1034.18		0.571248	1063.86
0.574142	1158.95		0.574142	1154.61		0.574142	953.257		0.574142	1000.03		0.574142	1033.6		0.574142	1063.17
0.577035	1151.75		0.577035	1148.61		0.577035	952.995		0.577035	999.552		0.577035	1033.02		0.577035	1062.49
0.579929	1144.78		0.579929	1142.82		0.579929	952.734		0.579929	999.077		0.579929	1032.44		0.579929	1061.82
0.582823	1138.03		0.582823	1137.21		0.582823	952.472		0.582823	998.602		0.582823	1031.86		0.582823	1061.14
0.585717	1131.52		0.585717	1131.8		0.585717	952.209		0.585717	998.129		0.585717	1031.28		0.585717	1060.47
0.588611	1125.26		0.588611	1126.56		0.588611	951.946		0.588611	997.656		0.588611	1030.71		0.588611	1059.8
0.591505	1119.22		0.591505	1121.49		0.591505	951.683		0.591505	997.184		0.591505	1030.14		0.591505	1059.13
0.594399	1113.39		0.594399	1116.59		0.594399	951.419		0.594399	996.712		0.594399	1029.57		0.594399	1058.47
0.597293	1107.77		0.597293	1111.86		0.597293	951.155		0.597293	996.242		0.597293	1029		0.597293	1057.81
0.600186	1102.33		0.600186	1107.3		0.600186	950.89		0.600186	995.773		0.600186	1028.43		0.600186	1057.15
0.60308	1097.07		0.60308	1102.9		0.60308	950.625		0.60308	995.304		0.60308	1027.87		0.60308	1056.49
0.605974	1091.97		0.605974	1098.64		0.605974	950.359		0.605974	994.837		0.605974	1027.31		0.605974	1055.84
0.608868	1087.04		0.608868	1094.53		0.608868	950.093		0.608868	994.371		0.608868	1026.75		0.608868	1055.19
0.611762	1082.29		0.611762	1090.56		0.611762	949.827		0.611762	993.906		0.611762	1026.19		0.611762	1054.54
0.614656	1077.72		0.614656	1086.71		0.614656	949.56		0.614656	993.442		0.614656	1025.63		0.614656	1053.89
0.61755	1073.31		0.61755	1082.98		0.61755	949.293		0.61755	992.979		0.61755	1025.08		0.61755	1053.25
0.620444	1069.06		0.620444	1079.37		0.620444	949.025		0.620444	992.517		0.620444	1024.53		0.620444	1052.61
0.623338	1064.97		0.623338	1075.88		0.623338	948.757		0.623338	992.057		0.623338	1023.98		0.623338	1051.97
0.626231	1061.04		0.626231	1072.5		0.626231	948.489		0.626231	991.598		0.626231	1023.43		0.626231	1051.34
0.629125	1057.25		0.629125	1069.22		0.629125	948.22		0.629125	991.14		0.629125	1022.88		0.629125	1050.7
0.632019	1053.6		0.632019	1066.04		0.632019	947.951		0.632019	990.683		0.632019	1022.34		0.632019	1050.07
0.634913	1050.08		0.634913	1062.96		0.634913	947.682		0.634913	990.228		0.634913	1021.8		0.634913	1049.45
0.637807	1046.68		0.637807	1059.99		0.637807	947.412		0.637807	989.774		0.637807	1021.26		0.637807	1048.82
0.640701	1043.4		0.640701	1057.1		0.640701	947.142		0.640701	989.321		0.640701	1020.72		0.640701	1048.2
0.643595	1040.23		0.643595	1054.31		0.643595	946.871		0.643595	988.87		0.643595	1020.18		0.643595	1047.58
0.643595	1040.23		0.643595	1054.31		0.643595	946.871		0.643595	988.87		0.643595	1020.18		0.643595	1047.58
0.646489	1037.17		0.646489	1051.59		0.646489	946.6		0.646489	988.42		0.646489	1019.65		0.646489	1046.96
0.649383	1034.22		0.649383	1048.96		0.649383	946.329		0.649383	987.972		0.649383	1019.12		0.649383	1046.34
0.652277	1031.38		0.652277	1046.41		0.652277	946.058		0.652277	987.525		0.652277	1018.59		0.652277	1045.73
0.65517	1028.63		0.65517	1043.93		0.65517	945.787		0.65517	987.08		0.65517	1018.06		0.65517	1045.12
0.658064	1025.98		0.658064	1041.53		0.658064	945.515		0.658064	986.636		0.658064	1017.54		0.658064	1044.51
0.660958	1023.41		0.660958	1039.19		0.660958	945.244		0.660958	986.193		0.660958	1017.01		0.660958	1043.9
0.663852	1020.94		0.663852	1036.92		0.663852	944.972		0.663852	985.752		0.663852	1016.49		0.663852	1043.29
0.666746	1018.55		0.666746	1034.72		0.666746	944.699		0.666746	985.313		0.666746	1015.97		0.666746	1042.69
0.66964	1016.24		0.66964	1032.58		0.66964	944.427		0.66964	984.875		0.66964	1015.45		0.66964	1042.09
0.672534	1014		0.672534	1030.49		0.672534	944.154		0.672534	984.438		0.672534	1014.94		0.672534	1041.49
0.675428	1011.85		0.675428	1028.47		0.675428	943.88		0.675428	984.003		0.675428	1014.42		0.675428	1040.89
0.678322	1009.76		0.678322	1026.5		0.678322	943.607		0.678322	983.569		0.678322	1013.91		0.678322	1040.3
0.681215	1007.74		0.681215	1024.58		0.681215	943.332		0.681215	983.136		0.681215	1013.4		0.681215	1039.7
0.684109	1005.79		0.684109	1022.71		0.684109	943.058		0.684109	982.705		0.684109	1012.89		0.684109	1039.11
0.687003	1003.9		0.687003	1020.89		0.687003	942.783		0.687003	982.276		0.687003	1012.38		0.687003	1038.51
0.689897	1002.06		0.689897	1019.12		0.689897	942.508		0.689897	981.847		0.689897	1011.87		0.689897	1037.92
0.692791	1000.29		0.692791	1017.4		0.692791	942.232		0.692791	981.42		0.692791	1011.36		0.692791	1037.33
0.695685	998.568		0.695685	1015.72		0.695685	941.956		0.695685	980.993		0.695685	1010.86		0.695685	1036.74
0.698579	996.9		0.698579	1014.08		0.698579	941.679		0.698579	980.568		0.698579	1010.35		0.698579	1036.15
0.701473	995.285		0.701473	1012.48		0.701473	941.401		0.701473	980.144		0.701473	1009.85		0.701473	1035.56
0.704367	993.718		0.704367	1010.92		0.704367	941.123		0.704367	979.721		0.704367	1009.34		0.704367	1034.97
0.70726	992.199		0.70726	1009.39		0.70726	940.845		0.70726	979.298		0.70726	1008.84		0.70726	1034.38
0.710154	990.723		0.710154	1007.9		0.710154	940.565		0.710154	978.876		0.710154	1008.34		0.710154	1033.79
0.713048	989.289		0.713048	1006.45		0.713048	940.284		0.713048	978.455		0.713048	1007.83		0.713048	1033.2
0.715942	987.893		0.715942	1005.02		0.715942	940.003		0.715942	978.033		0.715942	1007.33		0.715942	1032.61
0.715942	987.893		0.715942	1005.02		0.715942	940.003		0.715942	978.033		0.715942	1007.33		0.715942	1032.61
0.718836	986.534		0.718836	1003.62		0.718836	939.72		0.718836	977.612		0.718836	1006.82		0.718836	1032.01
0.72173	985.212		0.72173	1002.26		0.72173	939.436		0.72173	977.191		0.72173	1006.32		0.72173	1031.42
0.724624	983.924		0.724624	1000.92		0.724624	939.151		0.724624	976.769		0.724624	1005.81		0.724624	1030.82
0.727518	982.668		0.727518	999.603		0.727518	938.863		0.727518	976.346		0.727518	1005.3		0.727518	1030.21
0.730412	981.443		0.730412	998.315		0.730412	938.574		0.730412	975.922		0.730412	1004.79		0.730412	1029.6
0.733305	980.247		0.733305	997.049		0.733305	938.282		0.733305	975.496		0.733305	1004.27		0.733305	1028.99
0.736199	979.078		0.736199	995.805		0.736199	937.987		0.736199	975.068		0.736199	1003.75		0.736199	1028.37
0.739093	977.934		0.739093	994.581		0.739093	937.689		0.739093	974.638		0.739093	1003.23		0.739093	1027.75
0.741987	976.814		0.741987	993.374		0.741987	937.388		0.741987	974.204		0.741987	1002.7		0.741987	1027.12
0.744881	975.714		0.744881	992.184		0.744881	937.082		0.744881	973.765		0.744881	1002.16		0.744881	1026.48
0.747775	974.635		0.747775	991.009		0.747775	936.771		0.747775	973.322		0.747775	1001.62		0.747775	1025.83
0.750669	973.572		0.750669	989.846		0.750669	936.454		0.750669	972.872		0.750669	1001.06		0.750669	1025.16
0.753563	972.524		0.753563	988.693		0.753563	936.13		0.753563	972.414		0.753563	1000.5		0.753563	1024.49
0.756457	971.488		0.756457	987.547		0.756457	935.798		0.756457	971.948		0.756457	999.92		0.756457	1023.8
0.75935	970.462		0.75935	986.406		0.75935	935.458		0.75935	971.472		0.75935	999.329		0.75935	1023.09
0.762244	969.444		0.762244	985.266		0.762244	935.108		0.762244	970.984		0.762244	998.722		0.762244	1022.36
0.765138	968.43		0.765138	984.125		0.765138	934.746		0.765138	970.482		0.765138	998.096		0.765138	1021.61
0.768032	967.419		0.768032	982.98		0.768032	934.373		0.768032	969.965		0.768032	997.449		0.768032	1020.84
0.770926	966.406		0.770926	981.826		0.770926	933.987		0.770926	969.431		0.770926	996.78		0.770926	1020.03
0.77382	965.388		0.77382	980.659		0.77382	933.587		0.77382	968.878		0.77382	996.085		0.77382	1019.2
0.776714	964.363		0.776714	979.478		0.776714	933.172		0.776714	968.303		0.776714	995.362		0.776714	1018.33
0.779608	963.328		0.779608	978.278		0.779608	932.741		0.779608	967.707		0.779608	994.609		0.779608	1017.43
0.782502	962.279		0.782502	977.057		0.782502	932.293		0.782502	967.086		0.782502	993.823		0.782502	1016.49
0.785396	961.215		0.785396	975.812		0.785396	931.829		0.785396	966.439		0.785396	993.004		0.785396	1015.5
0.788289	960.133		0.788289	974.544		0.788289	931.346		0.788289	965.766		0.788289	992.148		0.788289	1014.48
0.791183	959.033		0.791183	973.253		0.791183	930.844		0.791183	965.065		0.791183	991.254		0.791183	1013.4
0.794077	957.914		0.794077	971.94		0.794077	930.321		0.794077	964.334		0.794077	990.321		0.794077	1012.28
0.796971	956.779		0.796971	970.608		0.796971	929.777		0.796971	963.572		0.796971	989.347		0.796971	1011.11
0.799865	955.627		0.799865	969.259		0.799865	929.211		0.799865	962.778		0.799865	988.332		0.799865	1009.89
0.799865	955.627		0.799865	969.259		0.799865	929.211		0.799865	962.778		0.799865	988.332		0.799865	1009.89
0.802759	954.464		0.802759	967.899		0.802759	928.619		0.802759	961.95		0.802759	987.274		0.802759	1008.63
0.805653	953.29		0.805653	966.528		0.805653	928.001		0.805653	961.087		0.805653	986.172		0.805653	1007.31
0.808547	952.11		0.808547	965.149		0.808547	927.354		0.808547	960.186		0.808547	985.025		0.808547	1005.94
0.811441	950.925		0.811441	963.764		0.811441	926.675		0.811441	959.246		0.811441	983.832		0.811441	1004.52
0.814334	949.737		0.814334	962.372		0.814334	925.962		0.814334	958.266		0.814334	982.593		0.814334	1003.05
0.817228	948.548		0.817228	960.974		0.817228	925.211		0.817228	957.241		0.817228	981.307		0.817228	1001.53
0.820122	947.358		0.820122	959.568		0.820122	924.421		0.820122	956.172		0.820122	979.972		0.820122	999.961
0.823016	946.167		0.823016	958.154		0.823016	923.588		0.823016	955.056		0.823016	978.59		0.823016	998.344
0.82591	944.974		0.82591	956.73		0.82591	922.71		0.82591	953.892		0.82591	977.16		0.82591	996.682
0.828804	943.781		0.828804	955.297		0.828804	921.783		0.828804	952.677		0.828804	975.682		0.828804	994.975
0.831698	942.588		0.831698	953.854		0.831698	920.806		0.831698	951.413		0.831698	974.159		0.831698	993.227
0.834592	941.393		0.834592	952.402		0.834592	919.778		0.834592	950.099		0.834592	972.592		0.834592	991.44
0.837486	940.2		0.837486	950.942		0.837486	918.697		0.837486	948.735		0.837486	970.983		0.837486	989.619
0.840379	939.008		0.840379	949.476		0.840379	917.563		0.840379	947.324		0.840379	969.337		0.840379	987.768
0.843273	937.821		0.843273	948.008		0.843273	916.378		0.843273	945.869		0.843273	967.659		0.843273	985.895
0.846167	936.642		0.846167	946.54		0.846167	915.144		0.846167	944.375		0.846167	965.954		0.846167	984.005
0.849061	935.473		0.849061	945.078		0.849061	913.866		0.849061	942.847		0.849061	964.23		0.849061	982.107
0.851955	934.32		0.851955	943.628		0.851955	912.549		0.851955	941.292		0.851955	962.496		0.851955	980.211
0.854849	933.188		0.854849	942.197		0.854849	911.201		0.854849	939.72		0.854849	960.761		0.854849	978.326
0.857743	932.082		0.857743	940.794		0.857743	909.832		0.857743	938.144		0.857743	959.038		0.857743	976.466
0.860637	931.012		0.860637	939.428		0.860637	908.456		0.860637	936.576		0.860637	957.342		0.860637	974.645
0.863531	929.988		0.863531	938.115		0.863531	907.092		0.863531	935.037		0.863531	955.691		0.863531	972.884
0.866424	929.026		0.866424	936.875		0.866424	905.764		0.866424	933.554		0.866424	954.114		0.866424	971.209
0.869318	928.148		0.869318	935.737		0.869318	904.51		0.869318	932.167		0.869318	952.651		0.869318	969.662
0.872212	927.393		0.872212	934.751		0.872212	903.393		0.872212	930.941		0.872212	951.368		0.872212	968.312
0.875106	926.824		0.875106	934.002		0.875106	902.515		0.875106	929.991		0.875106	950.382		0.875106	967.279
0.878	926.599		0.878	933.702		0.878	902.161		0.878	929.604		0.878	949.982		0.878	966.861

## Sheet: Axial Velocity
SN 0			SN 0.2			SN 0.4			SN 0.6			SN 0.8			SN 1
Axial distance	velocity		Axial distance	velocity		Axial distance	velocity		Axial distance	velocity		Axial distance	velocity		Axial distance	velocity
0.00115113	13.797		0.00115113	13.8836		0.00115113	13.4992		0.00115113	12.9758		0.00115113	12.7369		0.00115113	12.6917
0.00404502	13.8287		0.00404502	13.8818		0.00404502	13.2552		0.00404502	12.5592		0.00404502	12.2937		0.00404502	12.2554
0.00693891	13.8386		0.00693891	13.8521		0.00693891	12.9606		0.00693891	12.086		0.00693891	11.7926		0.00693891	11.7536
0.0098328	13.8241		0.0098328	13.7922		0.0098328	12.6159		0.0098328	11.544		0.0098328	11.2145		0.0098328	11.1685
0.0127267	13.7895		0.0127267	13.7051		0.0127267	12.2216		0.0127267	10.9274		0.0127267	10.5501		0.0127267	10.496
0.0156206	13.7398		0.0156206	13.596		0.0156206	11.7802		0.0156206	10.239		0.0156206	9.80333		0.0156206	9.74844
0.0185145	13.6782		0.0185145	13.4712		0.0185145	11.2989		0.0185145	9.48503		0.0185145	8.99255		0.0185145	8.95701
0.0214084	13.609		0.0214084	13.3367		0.0214084	10.785		0.0214084	8.67585		0.0214084	8.14622		0.0214084	8.15685
0.0243023	13.537		0.0243023	13.1989		0.0243023	10.2445		0.0243023	7.83015		0.0243023	7.29557		0.0243023	7.3783
0.0271961	13.4656		0.0271961	13.061		0.0271961	9.68419		0.0271961	6.97177		0.0271961	6.46986		0.0271961	6.64236
0.03009	13.3971		0.03009	12.9249		0.03009	9.11034		0.03009	6.12255		0.03009	5.68727		0.03009	5.95885
0.0329839	13.333		0.0329839	12.7941		0.0329839	8.52869		0.0329839	5.29713		0.0329839	4.95134		0.0329839	5.32995
0.0358778	13.2744		0.0358778	12.6692		0.0358778	7.94367		0.0358778	4.50289		0.0358778	4.25747		0.0358778	4.74681
0.0387717	13.2217		0.0387717	12.5505		0.0387717	7.35831		0.0387717	3.74422		0.0387717	3.59864		0.0387717	4.19496
0.0416656	13.1751		0.0416656	12.4384		0.0416656	6.77491		0.0416656	3.02782		0.0416656	2.97036		0.0416656	3.66205
0.0445595	13.1338		0.0445595	12.333		0.0445595	6.19426		0.0445595	2.36447		0.0445595	2.37606		0.0445595	3.13936
0.0474534	13.0975		0.0474534	12.2338		0.0474534	5.61503		0.0474534	1.76428		0.0474534	1.82503		0.0474534	2.62554
0.0503473	13.0661		0.0503473	12.14		0.0503473	5.03369		0.0503473	1.22853		0.0503473	1.32186		0.0503473	2.12775
0.0532412	13.0399		0.0532412	12.0504		0.0532412	4.44675		0.0532412	0.725409		0.0532412	0.846726		0.0532412	1.65613
0.056135	13.0187		0.056135	11.9638		0.056135	3.85383		0.056135	0.236059		0.056135	0.377043		0.056135	1.21618
0.0590289	13.0021		0.0590289	11.8797		0.0590289	3.25868		0.0590289	-0.208449		0.0590289	-0.0701581		0.0590289	0.786441
0.0619228	12.9894		0.0619228	11.7977		0.0619228	2.67286		0.0619228	-0.557218		0.0619228	-0.441824		0.0619228	0.351604
0.0648167	12.9799		0.0648167	11.7176		0.0648167	2.1165		0.0648167	-0.786449		0.0648167	-0.703906		0.0648167	-0.0678353
0.0677106	12.9728		0.0677106	11.6391		0.0677106	1.60625		0.0677106	-0.925397		0.0677106	-0.876527		0.0677106	-0.427511
0.0706045	12.9676		0.0706045	11.5621		0.0706045	1.13659		0.0706045	-1.01504		0.0706045	-0.998633		0.0706045	-0.693012
0.0734984	12.9639		0.0734984	11.4868		0.0734984	0.68592		0.0734984	-1.08155		0.0734984	-1.09598		0.0734984	-0.876678
0.0763923	12.9615		0.0763923	11.4138		0.0763923	0.24895		0.0763923	-1.13697		0.0763923	-1.1801		0.0763923	-1.01075
0.0792862	12.96		0.0792862	11.3433		0.0792862	-0.156174		0.0792862	-1.18715		0.0792862	-1.25629		0.0792862	-1.11912
0.0821801	12.9591		0.0821801	11.2755		0.0821801	-0.502828		0.0821801	-1.23538		0.0821801	-1.32722		0.0821801	-1.21282
0.085074	12.9589		0.085074	11.2104		0.085074	-0.772767		0.085074	-1.28377		0.085074	-1.39447		0.085074	-1.29676
0.085074	12.9589		0.085074	11.2104		0.085074	-0.772767		0.085074	-1.28377		0.085074	-1.39447		0.085074	-1.29676
0.0879678	12.9593		0.0879678	11.148		0.0879678	-0.965559		0.0879678	-1.33352		0.0879678	-1.45912		0.0879678	-1.37342
0.0908617	12.9599		0.0908617	11.0882		0.0908617	-1.09249		0.0908617	-1.38511		0.0908617	-1.52204		0.0908617	-1.44429
0.0937556	12.9606		0.0937556	11.0309		0.0937556	-1.17075		0.0937556	-1.43875		0.0937556	-1.58378		0.0937556	-1.5105
0.0966495	12.9615		0.0966495	10.9759		0.0966495	-1.218		0.0966495	-1.4945		0.0966495	-1.64457		0.0966495	-1.57296
0.0995434	12.9628		0.0995434	10.923		0.0995434	-1.24849		0.0995434	-1.55221		0.0995434	-1.70445		0.0995434	-1.63227
0.102437	12.9646		0.102437	10.872		0.102437	-1.27096		0.102437	-1.61161		0.102437	-1.76337		0.102437	-1.6888
0.105331	12.9669		0.105331	10.8226		0.105331	-1.29039		0.105331	-1.67235		0.105331	-1.8212		0.105331	-1.74274
0.108225	12.9698		0.108225	10.7748		0.108225	-1.31001		0.108225	-1.73405		0.108225	-1.87776		0.108225	-1.7941
0.111119	12.9732		0.111119	10.7284		0.111119	-1.33139		0.111119	-1.7963		0.111119	-1.93288		0.111119	-1.84286
0.114013	12.9772		0.114013	10.6835		0.114013	-1.35533		0.114013	-1.85871		0.114013	-1.9863		0.114013	-1.88902
0.116907	12.9819		0.116907	10.6398		0.116907	-1.38218		0.116907	-1.92089		0.116907	-2.03778		0.116907	-1.9325
0.119801	12.987		0.119801	10.5972		0.119801	-1.41212		0.119801	-1.98243		0.119801	-2.08707		0.119801	-1.97318
0.122695	12.9927		0.122695	10.5556		0.122695	-1.44509		0.122695	-2.04294		0.122695	-2.13397		0.122695	-2.01095
0.125588	12.9989		0.125588	10.515		0.125588	-1.48085		0.125588	-2.10207		0.125588	-2.1783		0.125588	-2.04571
0.128482	13.0055		0.128482	10.4753		0.128482	-1.51908		0.128482	-2.15949		0.128482	-2.21989		0.128482	-2.0774
0.131376	13.0124		0.131376	10.436		0.131376	-1.55946		0.131376	-2.21491		0.131376	-2.2586		0.131376	-2.10598
0.13427	13.0197		0.13427	10.3973		0.13427	-1.6016		0.13427	-2.26806		0.13427	-2.29432		0.13427	-2.13142
0.137164	13.0272		0.137164	10.3598		0.137164	-1.64513		0.137164	-2.31873		0.137164	-2.32696		0.137164	-2.15369
0.140058	13.0349		0.140058	10.3233		0.140058	-1.68962		0.140058	-2.3667		0.140058	-2.35645		0.140058	-2.17281
0.142952	13.0429		0.142952	10.2873		0.142952	-1.73465		0.142952	-2.41182		0.142952	-2.38275		0.142952	-2.1888
0.145846	13.0509		0.145846	10.252		0.145846	-1.7798		0.145846	-2.45392		0.145846	-2.40582		0.145846	-2.20169
0.14874	13.0591		0.14874	10.2173		0.14874	-1.82466		0.14874	-2.49289		0.14874	-2.42566		0.14874	-2.21157
0.151633	13.0673		0.151633	10.1834		0.151633	-1.86882		0.151633	-2.52862		0.151633	-2.44226		0.151633	-2.21836
0.154527	13.0757		0.154527	10.1504		0.154527	-1.91195		0.154527	-2.56103		0.154527	-2.45567		0.154527	-2.22228
0.157421	13.0842		0.157421	10.1183		0.157421	-1.95369		0.157421	-2.59006		0.157421	-2.46589		0.157421	-2.2236
0.160315	13.0926		0.160315	10.087		0.160315	-1.99376		0.160315	-2.61567		0.160315	-2.4729		0.160315	-2.22178
0.163209	13.101		0.163209	10.0564		0.163209	-2.03187		0.163209	-2.63783		0.163209	-2.47695		0.163209	-2.21738
0.166103	13.1093		0.166103	10.0267		0.166103	-2.0678		0.166103	-2.65653		0.166103	-2.47811		0.166103	-2.21066
0.166103	13.1093		0.166103	10.0267		0.166103	-2.0678		0.166103	-2.65653		0.166103	-2.47811		0.166103	-2.21066
0.168997	13.1176		0.168997	9.99757		0.168997	-2.10137		0.168997	-2.67183		0.168997	-2.47602		0.168997	-2.2013
0.171891	13.126		0.171891	9.96913		0.171891	-2.13241		0.171891	-2.68365		0.171891	-2.47117		0.171891	-2.18964
0.174785	13.1343		0.174785	9.94132		0.174785	-2.1608		0.174785	-2.69204		0.174785	-2.46375		0.174785	-2.17573
0.177678	13.1427		0.177678	9.91409		0.177678	-2.1864		0.177678	-2.69722		0.177678	-2.45354		0.177678	-2.1597
0.180572	13.1511		0.180572	9.88742		0.180572	-2.20912		0.180572	-2.69924		0.180572	-2.44082		0.180572	-2.14167
0.183466	13.1596		0.183466	9.86128		0.183466	-2.22889		0.183466	-2.69779		0.183466	-2.42565		0.183466	-2.12174
0.18636	13.1681		0.18636	9.83571		0.18636	-2.24562		0.18636	-2.69324		0.18636	-2.40816		0.18636	-2.10004
0.189254	13.1767		0.189254	9.81074		0.189254	-2.25929		0.189254	-2.68586		0.189254	-2.38845		0.189254	-2.07669
0.192148	13.1854		0.192148	9.78633		0.192148	-2.26984		0.192148	-2.67544		0.192148	-2.36666		0.192148	-2.05179
0.195042	13.1941		0.195042	9.76252		0.195042	-2.27727		0.195042	-2.66223		0.195042	-2.34289		0.195042	-2.02546
0.197936	13.2029		0.197936	9.73937		0.197936	-2.28167		0.197936	-2.64631		0.197936	-2.31727		0.197936	-1.99781
0.20083	13.2116		0.20083	9.71686		0.20083	-2.28303		0.20083	-2.6278		0.20083	-2.28991		0.20083	-1.96895
0.203723	13.2203		0.203723	9.69497		0.203723	-2.28099		0.203723	-2.60682		0.203723	-2.26094		0.203723	-1.939
0.206617	13.2291		0.206617	9.67371		0.206617	-2.27603		0.206617	-2.58349		0.206617	-2.23046		0.206617	-1.90805
0.209511	13.2378		0.209511	9.653		0.209511	-2.26828		0.209511	-2.55795		0.209511	-2.1986		0.209511	-1.8762
0.212405	13.2465		0.212405	9.63268		0.212405	-2.25745		0.212405	-2.5303		0.212405	-2.16547		0.212405	-1.84356
0.215299	13.2551		0.215299	9.61247		0.215299	-2.24378		0.215299	-2.50069		0.215299	-2.13118		0.215299	-1.81022
0.215299	13.2551		0.215299	9.61247		0.215299	-2.24378		0.215299	-2.50069		0.215299	-2.13118		0.215299	-1.81022
0.218193	13.2634		0.218193	9.59219		0.218193	-2.22731		0.218193	-2.46924		0.218193	-2.09583		0.218193	-1.77628
0.221087	13.2717		0.221087	9.57179		0.221087	-2.20817		0.221087	-2.43608		0.221087	-2.05954		0.221087	-1.7418
0.223981	13.2798		0.223981	9.55124		0.223981	-2.18644		0.223981	-2.40131		0.223981	-2.0224		0.223981	-1.7069
0.226875	13.288		0.226875	9.53053		0.226875	-2.16223		0.226875	-2.36508		0.226875	-1.98451		0.226875	-1.67163
0.229768	13.2961		0.229768	9.50963		0.229768	-2.13566		0.229768	-2.3275		0.229768	-1.94598		0.229768	-1.63608
0.232662	13.3043		0.232662	9.48856		0.232662	-2.10685		0.232662	-2.28869		0.232662	-1.90688		0.232662	-1.60033
0.235556	13.3124		0.235556	9.46742		0.235556	-2.07591		0.235556	-2.24876		0.235556	-1.86731		0.235556	-1.56443
0.23845	13.3202		0.23845	9.44637		0.23845	-2.04297		0.23845	-2.20783		0.23845	-1.82735		0.23845	-1.52847
0.241344	13.3276		0.241344	9.42551		0.241344	-2.00816		0.241344	-2.166		0.241344	-1.78709		0.241344	-1.49249
0.244238	13.3345		0.244238	9.40486		0.244238	-1.9716		0.244238	-2.12338		0.244238	-1.7466		0.244238	-1.45655
0.247132	13.3408		0.247132	9.38453		0.247132	-1.93342		0.247132	-2.08007		0.247132	-1.70595		0.247132	-1.42072
0.250026	13.3466		0.250026	9.36467		0.250026	-1.89375		0.250026	-2.03617		0.250026	-1.66521		0.250026	-1.38504
0.25292	13.352		0.25292	9.34528		0.25292	-1.85272		0.25292	-1.99176		0.25292	-1.62445		0.25292	-1.34955
0.255814	13.357		0.255814	9.32634		0.255814	-1.81044		0.255814	-1.94695		0.255814	-1.58373		0.255814	-1.3143
0.258707	13.3616		0.258707	9.3077		0.258707	-1.76705		0.258707	-1.9018		0.258707	-1.5431		0.258707	-1.27933
0.261601	13.3656		0.261601	9.28919		0.261601	-1.72265		0.261601	-1.85642		0.261601	-1.50262		0.261601	-1.24468
0.264495	13.3692		0.264495	9.27077		0.264495	-1.67738		0.264495	-1.81086		0.264495	-1.46235		0.264495	-1.21038
0.267389	13.3723		0.267389	9.25238		0.267389	-1.63135		0.267389	-1.76522		0.267389	-1.42233		0.267389	-1.17647
0.270283	13.3748		0.270283	9.23373		0.270283	-1.58467		0.270283	-1.71955		0.270283	-1.3826		0.270283	-1.14296
0.273177	13.3768		0.273177	9.21462		0.273177	-1.53745		0.273177	-1.67391		0.273177	-1.34321		0.273177	-1.10989
0.276071	13.378		0.276071	9.19508		0.276071	-1.48979		0.276071	-1.62839		0.276071	-1.30418		0.276071	-1.07727
0.278965	13.3787		0.278965	9.17522		0.278965	-1.44179		0.278965	-1.58302		0.278965	-1.26557		0.278965	-1.04514
0.281859	13.3789		0.281859	9.15501		0.281859	-1.39356		0.281859	-1.53787		0.281859	-1.2274		0.281859	-1.0135
0.284752	13.3786		0.284752	9.13424		0.284752	-1.34518		0.284752	-1.49298		0.284752	-1.1897		0.284752	-0.982367
0.287646	13.3778		0.287646	9.11285		0.287646	-1.29674		0.287646	-1.44841		0.287646	-1.15249		0.287646	-0.951759
0.29054	13.3765		0.29054	9.09102		0.29054	-1.24833		0.29054	-1.4042		0.29054	-1.11581		0.29054	-0.921684
0.293434	13.3747		0.293434	9.06896		0.293434	-1.20003		0.293434	-1.36038		0.293434	-1.07966		0.293434	-0.892152
0.296328	13.3724		0.296328	9.04664		0.296328	-1.1519		0.296328	-1.31701		0.296328	-1.04408		0.296328	-0.863169
0.299222	13.3691		0.299222	9.02398		0.299222	-1.10403		0.299222	-1.27411		0.299222	-1.00908		0.299222	-0.834739
0.302116	13.3651		0.302116	9.00125		0.302116	-1.05647		0.302116	-1.23171		0.302116	-0.974662		0.302116	-0.806866
0.30501	13.3604		0.30501	8.9786		0.30501	-1.00929		0.30501	-1.18984		0.30501	-0.940852		0.30501	-0.779551
0.307904	13.3551		0.307904	8.95559		0.307904	-0.962552		0.307904	-1.14854		0.307904	-0.907657		0.307904	-0.752793
0.310797	13.3487		0.310797	8.93181		0.310797	-0.916302		0.310797	-1.10782		0.310797	-0.875083		0.310797	-0.726593
0.313691	13.3412		0.313691	8.90742		0.313691	-0.870596		0.313691	-1.0677		0.313691	-0.843139		0.313691	-0.700946
0.313691	13.3412		0.313691	8.90742		0.313691	-0.870596		0.313691	-1.0677		0.313691	-0.843139		0.313691	-0.700946
0.316585	13.3326		0.316585	8.88263		0.316585	-0.8255		0.316585	-1.02822		0.316585	-0.811828		0.316585	-0.675848
0.319479	13.323		0.319479	8.85736		0.319479	-0.78104		0.319479	-0.989372		0.319479	-0.781154		0.319479	-0.651295
0.322373	13.3122		0.322373	8.83153		0.322373	-0.737253		0.322373	-0.951185		0.322373	-0.751118		0.322373	-0.627279
0.325267	13.3		0.325267	8.80515		0.325267	-0.694179		0.325267	-0.913668		0.325267	-0.721721		0.325267	-0.603795
0.328161	13.2863		0.328161	8.77826		0.328161	-0.651845		0.328161	-0.876834		0.328161	-0.69296		0.328161	-0.580834
0.331055	13.2709		0.331055	8.75086		0.331055	-0.610278		0.331055	-0.84069		0.331055	-0.664834		0.331055	-0.558387
0.333949	13.2541		0.333949	8.72286		0.333949	-0.569503		0.333949	-0.805245		0.333949	-0.637337		0.333949	-0.536445
0.336842	13.2362		0.336842	8.69431		0.336842	-0.529537		0.336842	-0.770503		0.336842	-0.610466		0.336842	-0.514997
0.339736	13.2173		0.339736	8.66553		0.339736	-0.4904		0.339736	-0.736469		0.339736	-0.584214		0.339736	-0.494033
0.34263	13.1971		0.34263	8.63657		0.34263	-0.452103		0.34263	-0.703146		0.34263	-0.558574		0.34263	-0.473543
0.345524	13.1756		0.345524	8.60682		0.345524	-0.414659		0.345524	-0.670533		0.345524	-0.533538		0.345524	-0.453513
0.348418	13.1529		0.348418	8.57601		0.348418	-0.378076		0.348418	-0.638631		0.348418	-0.509097		0.348418	-0.433933
0.351312	13.1288		0.351312	8.54457		0.351312	-0.34236		0.351312	-0.607438		0.351312	-0.485241		0.351312	-0.414791
0.354206	13.1034		0.354206	8.51295		0.354206	-0.307515		0.354206	-0.576951		0.354206	-0.46196		0.354206	-0.396074
0.3571	13.0768		0.3571	8.48117		0.3571	-0.273545		0.3571	-0.547166		0.3571	-0.439244		0.3571	-0.377771
0.359994	13.0486		0.359994	8.44896		0.359994	-0.240449		0.359994	-0.518079		0.359994	-0.417081		0.359994	-0.359867
0.362887	13.0183		0.362887	8.41602		0.362887	-0.208226		0.362887	-0.489682		0.362887	-0.395459		0.362887	-0.342353
0.365781	12.9856		0.365781	8.38266		0.365781	-0.176871		0.365781	-0.46197		0.365781	-0.374365		0.365781	-0.325213
0.368675	12.9508		0.368675	8.34905		0.368675	-0.146377		0.368675	-0.434933		0.368675	-0.353786		0.368675	-0.308436
0.371569	12.9139		0.371569	8.31484		0.371569	-0.116734		0.371569	-0.408562		0.371569	-0.33371		0.371569	-0.292009
0.374463	12.8745		0.374463	8.27992		0.374463	-0.0879294		0.374463	-0.382848		0.374463	-0.314122		0.374463	-0.27592
0.377357	12.8332		0.377357	8.24431		0.377357	-0.0599503		0.377357	-0.35778		0.377357	-0.295009		0.377357	-0.260155
0.380251	12.7904		0.380251	8.20761		0.380251	-0.0327857		0.380251	-0.33335		0.380251	-0.276358		0.380251	-0.244705
0.383145	12.7452		0.383145	8.16903		0.383145	-0.00642342		0.383145	-0.309545		0.383145	-0.258158		0.383145	-0.229558
0.386039	12.6966		0.386039	8.1286		0.386039	0.0191512		0.386039	-0.286355		0.386039	-0.240392		0.386039	-0.214703
0.388932	12.6443		0.388932	8.08708		0.388932	0.0439523		0.388932	-0.263765		0.388932	-0.223049		0.388932	-0.200127
0.391826	12.5894		0.391826	8.04482		0.391826	0.0679949		0.391826	-0.241765		0.391826	-0.206113		0.391826	-0.185821
0.39472	12.533		0.39472	8.0019		0.39472	0.0912909		0.39472	-0.22034		0.39472	-0.189571		0.39472	-0.171773
0.397614	12.4745		0.397614	7.95841		0.397614	0.113862		0.397614	-0.199477		0.397614	-0.173411		0.397614	-0.157974
0.400508	12.4121		0.400508	7.9143		0.400508	0.135709		0.400508	-0.179162		0.400508	-0.157617		0.400508	-0.144412
0.403402	12.346		0.403402	7.86933		0.403402	0.156875		0.403402	-0.159383		0.403402	-0.142179		0.403402	-0.131078
0.403402	12.346		0.403402	7.86933		0.403402	0.156875		0.403402	-0.159383		0.403402	-0.142179		0.403402	-0.131078
0.406296	12.2777		0.406296	7.82336		0.406296	0.177372		0.406296	-0.140125		0.406296	-0.127081		0.406296	-0.117964
0.40919	12.206		0.40919	7.77667		0.40919	0.197197		0.40919	-0.121374		0.40919	-0.112312		0.40919	-0.105059
0.412084	12.1288		0.412084	7.7296		0.412084	0.216394		0.412084	-0.103116		0.412084	-0.09786		0.412084	-0.092356
0.414977	12.0467		0.414977	7.68238		0.414977	0.234967		0.414977	-0.0853363		0.414977	-0.0837117		0.414977	-0.0798454
0.417871	11.9618		0.417871	7.63491		0.417871	0.252941		0.417871	-0.0680218		0.417871	-0.0698555		0.417871	-0.0675195
0.420765	11.8745		0.420765	7.58704		0.420765	0.270333		0.420765	-0.0511579		0.420765	-0.0562796		0.420765	-0.0553705
0.423659	11.7845		0.423659	7.53895		0.423659	0.287161		0.423659	-0.0347308		0.423659	-0.0429729		0.423659	-0.043391
0.426553	11.692		0.426553	7.49044		0.426553	0.303445		0.426553	-0.0187265		0.426553	-0.029924		0.426553	-0.0315738
0.429447	11.5972		0.429447	7.44129		0.429447	0.319203		0.429447	-0.00313115		0.429447	-0.0171225		0.429447	-0.0199121
0.432341	11.5007		0.432341	7.39178		0.432341	0.334455		0.432341	0.0120689		0.432341	-0.00455767		0.432341	-0.00839927
0.435235	11.4028		0.435235	7.34198		0.435235	0.349221		0.435235	0.0268872		0.435235	0.0077805		0.435235	0.00297094
0.438129	11.3039		0.438129	7.29171		0.438129	0.363518		0.438129	0.041337		0.438129	0.0199019		0.438129	0.0142045
0.441023	11.2038		0.441023	7.24099		0.441023	0.377366		0.441023	0.0554315		0.441023	0.0318159		0.441023	0.0253073
0.443916	11.1026		0.443916	7.18975		0.443916	0.390782		0.443916	0.0691834		0.443916	0.0435318		0.443916	0.0362847
0.44681	11.001		0.44681	7.13796		0.44681	0.403784		0.44681	0.0826056		0.44681	0.0550584		0.44681	0.047142
0.449704	10.8993		0.449704	7.08573		0.449704	0.416388		0.449704	0.0957103		0.449704	0.0664043		0.449704	0.0578842
0.452598	10.7973		0.452598	7.03299		0.452598	0.428611		0.452598	0.10851		0.452598	0.0775777		0.452598	0.0685163
0.455492	10.6952		0.455492	6.97967		0.455492	0.440469		0.455492	0.121016		0.455492	0.0885866		0.455492	0.0790429
0.458386	10.5931		0.458386	6.92594		0.458386	0.451978		0.458386	0.133241		0.458386	0.0994388		0.458386	0.0894685
0.46128	10.4906		0.46128	6.87194		0.46128	0.463151		0.46128	0.145195		0.46128	0.110142		0.46128	0.0997972
0.464174	10.388		0.464174	6.81757		0.464174	0.474003		0.464174	0.15689		0.464174	0.120702		0.464174	0.110033
0.467068	10.2852		0.467068	6.76266		0.467068	0.484547		0.467068	0.168336		0.467068	0.131127		0.467068	0.120181
0.469961	10.1825		0.469961	6.70719		0.469961	0.494797		0.469961	0.179545		0.469961	0.141423		0.469961	0.130243
0.472855	10.0797		0.472855	6.6513		0.472855	0.504765		0.472855	0.190525		0.472855	0.151597		0.472855	0.140224
0.475749	9.97691		0.475749	6.59504		0.475749	0.514462		0.475749	0.201288		0.475749	0.161655		0.475749	0.150128
0.478643	9.87417		0.478643	6.53844		0.478643	0.5239		0.478643	0.211843		0.478643	0.171601		0.478643	0.159957
0.481537	9.77162		0.481537	6.48153		0.481537	0.533091		0.481537	0.222199		0.481537	0.181444		0.481537	0.169716
0.484431	9.66932		0.484431	6.42424		0.484431	0.542044		0.484431	0.232365		0.484431	0.191186		0.484431	0.179407
0.487325	9.56726		0.487325	6.36656		0.487325	0.55077		0.487325	0.242351		0.487325	0.200835		0.487325	0.189033
0.490219	9.46552		0.490219	6.30855		0.490219	0.559278		0.490219	0.252164		0.490219	0.210395		0.490219	0.198598
0.493113	9.36414		0.493113	6.25021		0.493113	0.567579		0.493113	0.261813		0.493113	0.219871		0.493113	0.208105
0.496006	9.26304		0.496006	6.19159		0.496006	0.57568		0.496006	0.271306		0.496006	0.229268		0.496006	0.217557
0.4989	9.16229		0.4989	6.1328		0.4989	0.58359		0.4989	0.28065		0.4989	0.23859		0.4989	0.226957
0.501794	9.06206		0.501794	6.07391		0.501794	0.591317		0.501794	0.289854		0.501794	0.247842		0.501794	0.236307
0.504688	8.96213		0.504688	6.01496		0.504688	0.59887		0.504688	0.298925		0.504688	0.257028		0.504688	0.245611
0.507582	8.86246		0.507582	5.95596		0.507582	0.606253		0.507582	0.307869		0.507582	0.266153		0.507582	0.254872
0.510476	8.76347		0.510476	5.89685		0.510476	0.613476		0.510476	0.316694		0.510476	0.27522		0.510476	0.264093
0.51337	8.66528		0.51337	5.8377		0.51337	0.620543		0.51337	0.325406		0.51337	0.284234		0.51337	0.273275
0.516264	8.56771		0.516264	5.77866		0.516264	0.627462		0.516264	0.334012		0.516264	0.2932		0.516264	0.282424
0.519158	8.47072		0.519158	5.71966		0.519158	0.634239		0.519158	0.342519		0.519158	0.302121		0.519158	0.291542
0.522051	8.3742		0.522051	5.66053		0.522051	0.640876		0.522051	0.350934		0.522051	0.311001		0.522051	0.300633
0.524945	8.27799		0.524945	5.60125		0.524945	0.647378		0.524945	0.359261		0.524945	0.319845		0.524945	0.309698
0.524945	8.27799		0.524945	5.60125		0.524945	0.647378		0.524945	0.359261		0.524945	0.319845		0.524945	0.309698
0.527839	8.182		0.527839	5.54192		0.527839	0.653749		0.527839	0.367506		0.527839	0.328654		0.527839	0.318742
0.530733	8.08633		0.530733	5.48263		0.530733	0.66		0.530733	0.375675		0.530733	0.337434		0.530733	0.327767
0.533627	7.9911		0.533627	5.42341		0.533627	0.666135		0.533627	0.383774		0.533627	0.346188		0.533627	0.336776
0.536521	7.89635		0.536521	5.36431		0.536521	0.672159		0.536521	0.391809		0.536521	0.354919		0.536521	0.345773
0.539415	7.80213		0.539415	5.30537		0.539415	0.678076		0.539415	0.399784		0.539415	0.363633		0.539415	0.354761
0.542309	7.70847		0.542309	5.24663		0.542309	0.683891		0.542309	0.407705		0.542309	0.372332		0.542309	0.363744
0.545203	7.61539		0.545203	5.18813		0.545203	0.689612		0.545203	0.415578		0.545203	0.381021		0.545203	0.372726
0.548096	7.52294		0.548096	5.12989		0.548096	0.69524		0.548096	0.423408		0.548096	0.389704		0.548096	0.38171
0.55099	7.43116		0.55099	5.07195		0.55099	0.700782		0.55099	0.431199		0.55099	0.398383		0.55099	0.390699
0.553884	7.3401		0.553884	5.01433		0.553884	0.70624		0.553884	0.438958		0.553884	0.407065		0.553884	0.399698
0.556778	7.24978		0.556778	4.95707		0.556778	0.71162		0.556778	0.446688		0.556778	0.415751		0.556778	0.40871
0.559672	7.16019		0.559672	4.90017		0.559672	0.716924		0.559672	0.454395		0.559672	0.424447		0.559672	0.41774
0.562566	7.0713		0.562566	4.84366		0.562566	0.722158		0.562566	0.462084		0.562566	0.433157		0.562566	0.426791
0.56546	6.98316		0.56546	4.78755		0.56546	0.727325		0.56546	0.469761		0.56546	0.441885		0.56546	0.435868
0.568354	6.89581		0.568354	4.73185		0.568354	0.732431		0.568354	0.477429		0.568354	0.450635		0.568354	0.444974
0.571248	6.80927		0.571248	4.67659		0.571248	0.737478		0.571248	0.485095		0.571248	0.459412		0.571248	0.454115
0.574142	6.72348		0.574142	4.62179		0.574142	0.742471		0.574142	0.492764		0.574142	0.468221		0.574142	0.463296
0.577035	6.63843		0.577035	4.56746		0.577035	0.747415		0.577035	0.500439		0.577035	0.477066		0.577035	0.472521
0.579929	6.55412		0.579929	4.5136		0.579929	0.752315		0.579929	0.508128		0.579929	0.485951		0.579929	0.481797
0.582823	6.47055		0.582823	4.46022		0.582823	0.757174		0.582823	0.515835		0.582823	0.494882		0.582823	0.49113
0.585717	6.3878		0.585717	4.40732		0.585717	0.761998		0.585717	0.523566		0.585717	0.503864		0.585717	0.500527
0.588611	6.30591		0.588611	4.35493		0.588611	0.766791		0.588611	0.531326		0.588611	0.512902		0.588611	0.509991
0.591505	6.22486		0.591505	4.30305		0.591505	0.771558		0.591505	0.539121		0.591505	0.522003		0.591505	0.519528
0.594399	6.14462		0.594399	4.2517		0.594399	0.776304		0.594399	0.546956		0.594399	0.531172		0.594399	0.52914
0.597293	6.06517		0.597293	4.2009		0.597293	0.781035		0.597293	0.554838		0.597293	0.540417		0.597293	0.538831
0.600186	5.98649		0.600186	4.15067		0.600186	0.785755		0.600186	0.562773		0.600186	0.549745		0.600186	0.548607
0.60308	5.90858		0.60308	4.10101		0.60308	0.79047		0.60308	0.570766		0.60308	0.559163		0.60308	0.558475
0.605974	5.83145		0.605974	4.0519		0.605974	0.795186		0.605974	0.578824		0.605974	0.568676		0.605974	0.568442
0.608868	5.75514		0.608868	4.00336		0.608868	0.799908		0.608868	0.586954		0.608868	0.578287		0.608868	0.578517
0.611762	5.6797		0.611762	3.95537		0.611762	0.804644		0.611762	0.595163		0.611762	0.588002		0.611762	0.588706
0.614656	5.60511		0.614656	3.90794		0.614656	0.809398		0.614656	0.603459		0.614656	0.597827		0.614656	0.599018
0.61755	5.5314		0.61755	3.86108		0.61755	0.814178		0.61755	0.611851		0.61755	0.60777		0.61755	0.609459
0.620444	5.45856		0.620444	3.8148		0.620444	0.81899		0.620444	0.620347		0.620444	0.61784		0.620444	0.620037
0.623338	5.38659		0.623338	3.7691		0.623338	0.823843		0.623338	0.628956		0.623338	0.628048		0.623338	0.63076
0.626231	5.31549		0.626231	3.72398		0.626231	0.828745		0.626231	0.637685		0.626231	0.6384		0.626231	0.641636
0.629125	5.24524		0.629125	3.67944		0.629125	0.833704		0.629125	0.64654		0.629125	0.648908		0.629125	0.652673
0.632019	5.17583		0.632019	3.6355		0.632019	0.838726		0.632019	0.655529		0.632019	0.659579		0.632019	0.66388
0.634913	5.10727		0.634913	3.59216		0.634913	0.843822		0.634913	0.664659		0.634913	0.670423		0.634913	0.675265
0.637807	5.03953		0.637807	3.54943		0.637807	0.848998		0.637807	0.673941		0.637807	0.68145		0.637807	0.686838
0.640701	4.97263		0.640701	3.50731		0.640701	0.854262		0.640701	0.683388		0.640701	0.692669		0.640701	0.698609
0.643595	4.90655		0.643595	3.46578		0.643595	0.859623		0.643595	0.693011		0.643595	0.704092		0.643595	0.710587
0.643595	4.90655		0.643595	3.46578		0.643595	0.859623		0.643595	0.693011		0.643595	0.704092		0.643595	0.710587
0.646489	4.84132		0.646489	3.42485		0.646489	0.865094		0.646489	0.702821		0.646489	0.71573		0.646489	0.722784
0.649383	4.77693		0.649383	3.38452		0.649383	0.870684		0.649383	0.712832		0.649383	0.727593		0.649383	0.735209
0.652277	4.71338		0.652277	3.3448		0.652277	0.876408		0.652277	0.723054		0.652277	0.739695		0.652277	0.747874
0.65517	4.65066		0.65517	3.30568		0.65517	0.882276		0.65517	0.7335		0.65517	0.752048		0.65517	0.760791
0.658064	4.5888		0.658064	3.26718		0.658064	0.888301		0.658064	0.744185		0.658064	0.764664		0.658064	0.773972
0.660958	4.52777		0.660958	3.2293		0.660958	0.894496		0.660958	0.755122		0.660958	0.777558		0.660958	0.787428
0.663852	4.4676		0.663852	3.19203		0.663852	0.900878		0.663852	0.766327		0.663852	0.790744		0.663852	0.801174
0.666746	4.40827		0.666746	3.1554		0.666746	0.907459		0.666746	0.777815		0.666746	0.804238		0.666746	0.815224
0.66964	4.3498		0.66964	3.11939		0.66964	0.914257		0.66964	0.789603		0.66964	0.818055		0.66964	0.829591
0.672534	4.29218		0.672534	3.08401		0.672534	0.921288		0.672534	0.801709		0.672534	0.832212		0.672534	0.84429
0.675428	4.23543		0.675428	3.04928		0.675428	0.928571		0.675428	0.814151		0.675428	0.846726		0.675428	0.859338
0.678322	4.17954		0.678322	3.01519		0.678322	0.936124		0.678322	0.826948		0.678322	0.861615		0.678322	0.874751
0.681215	4.12453		0.681215	2.98175		0.681215	0.943969		0.681215	0.840121		0.681215	0.876899		0.681215	0.890545
0.684109	4.07038		0.684109	2.94897		0.684109	0.952127		0.684109	0.853692		0.684109	0.892598		0.684109	0.906741
0.687003	4.01712		0.687003	2.91687		0.687003	0.96062		0.687003	0.867683		0.687003	0.908734		0.687003	0.923355
0.689897	3.96474		0.689897	2.88544		0.689897	0.969476		0.689897	0.88212		0.689897	0.92533		0.689897	0.940409
0.692791	3.91326		0.692791	2.85471		0.692791	0.978718		0.692791	0.897029		0.692791	0.942408		0.692791	0.957924
0.695685	3.8627		0.695685	2.82468		0.695685	0.988376		0.695685	0.912437		0.695685	0.959995		0.695685	0.975921
0.698579	3.81306		0.698579	2.79537		0.698579	0.99848		0.698579	0.928373		0.698579	0.978117		0.698579	0.994424
0.701473	3.76437		0.701473	2.7668		0.701473	1.00906		0.701473	0.944869		0.701473	0.996802		0.701473	1.01346
0.704367	3.71664		0.704367	2.73899		0.704367	1.02016		0.704367	0.961957		0.704367	1.01608		0.704367	1.03305
0.70726	3.6699		0.70726	2.71195		0.70726	1.0318		0.70726	0.979673		0.70726	1.03598		0.70726	1.05323
0.710154	3.62416		0.710154	2.68572		0.710154	1.04404		0.710154	0.998054		0.710154	1.05655		0.710154	1.07402
0.713048	3.57944		0.713048	2.66031		0.713048	1.0569		0.713048	1.01714		0.713048	1.07781		0.713048	1.09546
0.715942	3.53578		0.715942	2.63575		0.715942	1.07044		0.715942	1.03698		0.715942	1.0998		0.715942	1.11758
0.715942	3.53578		0.715942	2.63575		0.715942	1.07044		0.715942	1.03698		0.715942	1.0998		0.715942	1.11758
0.718836	3.49322		0.718836	2.61207		0.718836	1.08472		0.718836	1.05761		0.718836	1.12257		0.718836	1.14042
0.72173	3.45179		0.72173	2.58934		0.72173	1.09977		0.72173	1.07909		0.72173	1.14616		0.72173	1.16402
0.724624	3.41153		0.724624	2.5676		0.724624	1.11566		0.724624	1.10146		0.724624	1.17061		0.724624	1.18841
0.727518	3.37251		0.727518	2.54688		0.727518	1.13246		0.727518	1.1248		0.727518	1.19599		0.727518	1.21364
0.730412	3.33475		0.730412	2.52725		0.730412	1.15022		0.730412	1.14915		0.730412	1.22234		0.730412	1.23976
0.733305	3.29831		0.733305	2.50876		0.733305	1.16903		0.733305	1.17458		0.733305	1.24972		0.733305	1.26682
0.736199	3.26331		0.736199	2.4915		0.736199	1.18896		0.736199	1.20118		0.736199	1.2782		0.736199	1.29487
0.739093	3.22982		0.739093	2.47553		0.739093	1.2101		0.739093	1.22901		0.739093	1.30785		0.739093	1.32399
0.741987	3.19793		0.741987	2.46095		0.741987	1.23254		0.741987	1.25816		0.741987	1.33874		0.741987	1.35422
0.744881	3.16773		0.744881	2.44786		0.744881	1.2564		0.744881	1.28873		0.744881	1.37095		0.744881	1.38565
0.747775	3.13934		0.747775	2.43639		0.747775	1.28178		0.747775	1.32081		0.747775	1.40459		0.747775	1.41835
0.750669	3.11289		0.750669	2.42665		0.750669	1.3088		0.750669	1.35453		0.750669	1.43973		0.750669	1.4524
0.753563	3.08854		0.753563	2.41881		0.753563	1.33761		0.753563	1.38999		0.753563	1.4765		0.753563	1.48791
0.756457	3.06646		0.756457	2.413		0.756457	1.36835		0.756457	1.42735		0.756457	1.51501		0.756457	1.52496
0.75935	3.04684		0.75935	2.40944		0.75935	1.40119		0.75935	1.46674		0.75935	1.55539		0.75935	1.56368
0.762244	3.0299		0.762244	2.40838		0.762244	1.43631		0.762244	1.50833		0.762244	1.59779		0.762244	1.60418
0.765138	3.01591		0.765138	2.41006		0.765138	1.47392		0.765138	1.5523		0.765138	1.64235		0.765138	1.64661
0.768032	3.00516		0.768032	2.41474		0.768032	1.51424		0.768032	1.59885		0.768032	1.68926		0.768032	1.69111
0.770926	2.99795		0.770926	2.42277		0.770926	1.55751		0.770926	1.6482		0.770926	1.73871		0.770926	1.73785
0.77382	2.9947		0.77382	2.43451		0.77382	1.604		0.77382	1.7006		0.77382	1.7909		0.77382	1.78702
0.776714	2.99585		0.776714	2.45037		0.776714	1.65402		0.776714	1.7563		0.776714	1.84608		0.776714	1.8388
0.779608	3.00184		0.779608	2.47083		0.779608	1.70788		0.779608	1.81562		0.779608	1.90448		0.779608	1.89344
0.782502	3.01325		0.782502	2.49641		0.782502	1.76596		0.782502	1.87886		0.782502	1.96639		0.782502	1.95116
0.785396	3.03067		0.785396	2.52772		0.785396	1.82865		0.785396	1.94639		0.785396	2.03212		0.785396	2.01225
0.788289	3.05479		0.788289	2.56537		0.788289	1.89641		0.788289	2.01861		0.788289	2.10202		0.788289	2.07702
0.791183	3.08635		0.791183	2.61006		0.791183	1.96974		0.791183	2.09595		0.791183	2.17646		0.791183	2.14579
0.794077	3.12618		0.794077	2.66253		0.794077	2.04919		0.794077	2.17891		0.794077	2.25588		0.794077	2.21895
0.796971	3.17514		0.796971	2.72358		0.796971	2.13539		0.796971	2.26804		0.796971	2.34073		0.796971	2.29692
0.799865	3.23416		0.799865	2.79406		0.799865	2.22905		0.799865	2.36393		0.799865	2.43154		0.799865	2.38016
0.799865	3.23416		0.799865	2.79406		0.799865	2.22905		0.799865	2.36393		0.799865	2.43154		0.799865	2.38016
0.802759	3.30427		0.802759	2.8749		0.802759	2.33096		0.802759	2.46727		0.802759	2.52892		0.802759	2.4692
0.805653	3.38653		0.805653	2.96714		0.805653	2.44201		0.805653	2.57883		0.805653	2.6335		0.805653	2.56462
0.808547	3.48212		0.808547	3.07192		0.808547	2.56322		0.808547	2.69948		0.808547	2.74605		0.808547	2.66707
0.811441	3.59234		0.811441	3.19053		0.811441	2.6957		0.811441	2.83018		0.811441	2.8674		0.811441	2.77731
0.814334	3.71863		0.814334	3.32442		0.814334	2.84074		0.814334	2.97202		0.814334	2.99846		0.814334	2.89613
0.817228	3.8626		0.817228	3.47526		0.817228	2.99976		0.817228	3.12621		0.817228	3.14029		0.817228	3.02447
0.820122	4.02609		0.820122	3.64489		0.820122	3.17433		0.820122	3.2941		0.820122	3.29404		0.820122	3.16333
0.823016	4.21113		0.823016	3.83543		0.823016	3.36622		0.823016	3.4772		0.823016	3.46097		0.823016	3.31382
0.82591	4.42		0.82591	4.0492		0.82591	3.57737		0.82591	3.67713		0.82591	3.64248		0.82591	3.47717
0.828804	4.65523		0.828804	4.28878		0.828804	3.80989		0.828804	3.89568		0.828804	3.84007		0.828804	3.65468
0.831698	4.91954		0.831698	4.55696		0.831698	4.06606		0.831698	4.13478		0.831698	4.05537		0.831698	3.84777
0.834592	5.21587		0.834592	4.85671		0.834592	4.34833		0.834592	4.39644		0.834592	4.29005		0.834592	4.05788
0.837486	5.54724		0.837486	5.19112		0.837486	4.65922		0.837486	4.68275		0.837486	4.54583		0.837486	4.2865
0.840379	5.91671		0.840379	5.56333		0.840379	5.0013		0.840379	4.99579		0.840379	4.8244		0.840379	4.53507
0.843273	6.32722		0.843273	5.97639		0.843273	5.37707		0.843273	5.33755		0.843273	5.12734		0.843273	4.8049
0.846167	6.78142		0.846167	6.43309		0.846167	5.78885		0.846167	5.70975		0.846167	5.45597		0.846167	5.09708
0.849061	7.28144		0.849061	6.93572		0.849061	6.2385		0.849061	6.11373		0.849061	5.81123		0.849061	5.41232
0.851955	7.82864		0.851955	7.48589		0.851955	6.72734		0.851955	6.55022		0.851955	6.19347		0.851955	5.7508
0.854849	8.42327		0.854849	8.08412		0.854849	7.2557		0.854849	7.01904		0.854849	6.60224		0.854849	6.11194
0.857743	9.06446		0.857743	8.72981		0.857743	7.82297		0.857743	7.5191		0.857743	7.03623		0.857743	6.49443
0.860637	9.74925		0.860637	9.42029		0.860637	8.42659		0.860637	8.04759		0.860637	7.49262		0.860637	6.89557
0.863531	10.4746		0.863531	10.1529		0.863531	9.06406		0.863531	8.6016		0.863531	7.96847		0.863531	7.31254
0.866424	11.2315		0.866424	10.9186		0.866424	9.72694		0.866424	9.1733		0.866424	8.45674		0.866424	7.73901
0.869318	12.0233		0.869318	11.7216		0.869318	10.4191		0.869318	9.76507		0.869318	8.95889		0.869318	8.17595
0.872212	12.8204		0.872212	12.5306		0.872212	11.1106		0.872212	10.3518		0.872212	9.45402		0.872212	8.60536
0.875106	13.7048		0.875106	13.4318		0.875106	11.8797		0.875106	10.9989		0.875106	9.99658		0.875106	9.07417
0.878	14.1997		0.878	13.938		0.878	12.3135		0.878	11.3625		0.878	10.3004		0.878	9.33626

## Sheet: Radial temp distribution
SN 0			SN 0.2			SN 0.4			SN 0.6			SN 0.8			SN 1
Radial distance	temperature		Radial distance	temperature		Radial distance	temperature		Radial distance	temperature		Radial distance	temperature		Radial distance	temperature
0	926.603		0	933.705		0	902.169		0	929.604		0	949.982		0	966.861
0.005	926.167		0.005	933.128		0.005	901.431		0.005	928.86		0.005	949.22		0.005	966.069
0.01	924.888		0.01	931.438		0.01	899.245		0.01	926.656		0.01	946.966		0.01	963.729
0.015	922.751		0.015	928.619		0.015	895.544		0.015	922.922		0.015	943.159		0.015	959.787
0.02	919.708		0.02	924.621		0.02	890.172		0.02	917.497		0.02	937.655		0.02	954.102
0.025	915.71		0.025	919.403		0.025	882.974		0.025	910.224		0.025	930.317		0.025	946.549
0.03	910.615		0.03	912.821		0.03	873.692		0.03	900.836		0.03	920.9		0.03	936.889
0.035	903.964		0.035	904.381		0.035	861.693		0.035	888.694		0.035	908.794		0.035	924.5
0.04	893.104		0.04	891.137		0.04	843.637		0.04	870.447		0.04	890.709		0.04	905.988
0.045	762.387		0.045	756.662		0.045	718.99		0.045	735.129		0.045	746.112		0.045	752.758

## Sheet: n2o distribution
SN 0			SN 0.2			SN 0.4			SN 0.6			SN 0.8			SN 1
Axial distance	n2o mass fraction		Axial distance	n2o mass fraction		Axial distance	n2o mass fraction		Axial distance	n2o mass fraction		Axial distance	n2o mass fraction		Axial distance	n2o mass fraction
0.00115113	3.06498e-10		0.00115113	3.29398e-10		0.00115113	6.76606e-11		0.00115113	3.50143e-11		0.00115113	2.12947e-11		0.00115113	1.08892e-11
0.00404502	4.47488e-10		0.00404502	4.74628e-10		0.00404502	8.08658e-11		0.00404502	4.73162e-11		0.00404502	2.4639e-11		0.00404502	1.20994e-11
0.00693891	6.14723e-10		0.00693891	6.41212e-10		0.00693891	9.4136e-11		0.00693891	5.96142e-11		0.00693891	2.74277e-11		0.00693891	1.29691e-11
0.0098328	8.01638e-10		0.0098328	8.18789e-10		0.0098328	1.10281e-10		0.0098328	7.08385e-11		0.0098328	2.93304e-11		0.0098328	1.34029e-11
0.0127267	9.98269e-10		0.0127267	9.94371e-10		0.0127267	1.315e-10		0.0127267	7.9656e-11		0.0127267	3.02003e-11		0.0127267	1.32053e-11
0.0156206	1.19224e-09		0.0156206	1.15378e-09		0.0156206	1.57675e-10		0.0156206	8.51242e-11		0.0156206	2.99331e-11		0.0156206	1.24109e-11
0.0185145	1.37074e-09		0.0185145	1.28436e-09		0.0185145	1.86413e-10		0.0185145	8.62904e-11		0.0185145	2.86936e-11		0.0185145	1.13263e-11
0.0214084	1.52363e-09		0.0214084	1.37899e-09		0.0214084	2.14531e-10		0.0214084	8.37629e-11		0.0214084	2.67844e-11		0.0214084	1.04764e-11
0.0243023	1.64431e-09		0.0243023	1.4359e-09		0.0243023	2.39141e-10		0.0243023	7.904e-11		0.0243023	2.48224e-11		0.0243023	1.03903e-11
0.0271961	1.7297e-09		0.0271961	1.45689e-09		0.0271961	2.58204e-10		0.0271961	7.3072e-11		0.0271961	2.36732e-11		0.0271961	1.15322e-11
0.03009	1.78002e-09		0.03009	1.44759e-09		0.03009	2.70872e-10		0.03009	6.68242e-11		0.03009	2.48984e-11		0.03009	1.4384e-11
0.0329839	1.79806e-09		0.0329839	1.41546e-09		0.0329839	2.77168e-10		0.0329839	6.33811e-11		0.0329839	3.15879e-11		0.0329839	1.95036e-11
0.0358778	1.78903e-09		0.0358778	1.36727e-09		0.0358778	2.77566e-10		0.0358778	7.11169e-11		0.0358778	5.13243e-11		0.0358778	2.78698e-11
0.0387717	1.75868e-09		0.0387717	1.30935e-09		0.0387717	2.73138e-10		0.0387717	1.12533e-10		0.0387717	1.02071e-10		0.0387717	4.20779e-11
0.0416656	1.71205e-09		0.0416656	1.24758e-09		0.0416656	2.65135e-10		0.0416656	2.48002e-10		0.0416656	2.34808e-10		0.0416656	6.98863e-11
0.0445595	1.6539e-09		0.0445595	1.18718e-09		0.0445595	2.54375e-10		0.0445595	6.32258e-10		0.0445595	5.39161e-10		0.0445595	1.3285e-10
0.0474534	1.58872e-09		0.0474534	1.13313e-09		0.0474534	2.41589e-10		0.0474534	1.51994e-09		0.0474534	1.20549e-09		0.0474534	2.79205e-10
0.0503473	1.52042e-09		0.0503473	1.0896e-09		0.0503473	2.28008e-10		0.0503473	3.34384e-09		0.0503473	2.65188e-09		0.0503473	6.19483e-10
0.0532412	1.45237e-09		0.0532412	1.05924e-09		0.0532412	2.15148e-10		0.0532412	7.04551e-09		0.0532412	5.59731e-09		0.0532412	1.37393e-09
0.056135	1.38758e-09		0.056135	1.04294e-09		0.056135	2.09594e-10		0.056135	1.38043e-08		0.056135	1.09885e-08		0.056135	2.89582e-09
0.0590289	1.32861e-09		0.0590289	1.03977e-09		0.0590289	2.33849e-10		0.0590289	2.38644e-08		0.0590289	1.92661e-08		0.0590289	5.79706e-09
0.0619228	1.27758e-09		0.0619228	1.048e-09		0.0619228	3.5305e-10		0.0619228	3.56581e-08		0.0619228	2.92896e-08		0.0619228	1.08669e-08
0.0648167	1.23612e-09		0.0648167	1.06577e-09		0.0648167	7.29422e-10		0.0648167	4.62338e-08		0.0648167	3.84854e-08		0.0648167	1.84395e-08
0.0677106	1.20531e-09		0.0677106	1.09101e-09		0.0677106	1.63718e-09		0.0677106	4.89672e-08		0.0677106	4.02826e-08		0.0677106	2.77029e-08
0.0706045	1.18572e-09		0.0706045	1.12163e-09		0.0706045	3.53802e-09		0.0706045	4.38934e-08		0.0706045	3.49344e-08		0.0706045	3.66666e-08
0.0734984	1.17724e-09		0.0734984	1.15552e-09		0.0734984	7.05433e-09		0.0734984	3.75384e-08		0.0734984	2.91949e-08		0.0734984	3.90429e-08
0.0763923	1.17901e-09		0.0763923	1.19069e-09		0.0763923	1.24924e-08		0.0763923	3.17554e-08		0.0763923	2.46338e-08		0.0763923	3.46645e-08
0.0792862	1.19007e-09		0.0792862	1.22522e-09		0.0792862	1.99679e-08		0.0792862	2.68222e-08		0.0792862	2.11781e-08		0.0792862	2.96821e-08
0.0821801	1.20967e-09		0.0821801	1.25747e-09		0.0821801	2.93263e-08		0.0821801	2.27082e-08		0.0821801	1.85003e-08		0.0821801	2.55385e-08
0.085074	1.23694e-09		0.085074	1.28613e-09		0.085074	3.99291e-08		0.085074	1.93759e-08		0.085074	1.63762e-08		0.085074	2.23284e-08
0.085074	1.23694e-09		0.085074	1.28613e-09		0.085074	3.99291e-08		0.085074	1.93759e-08		0.085074	1.63762e-08		0.085074	2.23284e-08
0.0879678	1.27084e-09		0.0879678	1.31043e-09		0.0879678	5.10261e-08		0.0879678	1.66964e-08		0.0879678	1.46521e-08		0.0879678	1.98537e-08
0.0908617	1.31016e-09		0.0908617	1.33005e-09		0.0908617	6.13194e-08		0.0908617	1.45201e-08		0.0908617	1.32602e-08		0.0908617	1.79323e-08
0.0937556	1.35363e-09		0.0937556	1.34514e-09		0.0937556	6.66384e-08		0.0937556	1.27453e-08		0.0937556	1.21445e-08		0.0937556	1.64305e-08
0.0966495	1.39996e-09		0.0966495	1.3562e-09		0.0966495	6.48892e-08		0.0966495	1.13038e-08		0.0966495	1.12489e-08		0.0966495	1.52484e-08
0.0995434	1.44792e-09		0.0995434	1.36399e-09		0.0995434	5.89761e-08		0.0995434	1.01315e-08		0.0995434	1.0531e-08		0.0995434	1.43185e-08
0.102437	1.49642e-09		0.102437	1.3694e-09		0.102437	5.18659e-08		0.102437	9.17782e-09		0.102437	9.9566e-09		0.102437	1.35872e-08
0.105331	1.54436e-09		0.105331	1.37343e-09		0.105331	4.49444e-08		0.105331	8.40179e-09		0.105331	9.49881e-09		0.105331	1.30132e-08
0.108225	1.59055e-09		0.108225	1.37704e-09		0.108225	3.86622e-08		0.108225	7.77278e-09		0.108225	9.13406e-09		0.108225	1.25624e-08
0.111119	1.63418e-09		0.111119	1.3812e-09		0.111119	3.32684e-08		0.111119	7.26222e-09		0.111119	8.84341e-09		0.111119	1.22083e-08
0.114013	1.67465e-09		0.114013	1.38743e-09		0.114013	2.8683e-08		0.114013	6.84463e-09		0.114013	8.61323e-09		0.114013	1.19316e-08
0.116907	1.7115e-09		0.116907	1.39629e-09		0.116907	2.48261e-08		0.116907	6.50396e-09		0.116907	8.43168e-09		0.116907	1.17164e-08
0.119801	1.74445e-09		0.119801	1.40744e-09		0.119801	2.15979e-08		0.119801	6.22768e-09		0.119801	8.2889e-09		0.119801	1.15483e-08
0.122695	1.77334e-09		0.122695	1.42133e-09		0.122695	1.89005e-08		0.122695	6.00524e-09		0.122695	8.17671e-09		0.122695	1.14161e-08
0.125588	1.79814e-09		0.125588	1.4384e-09		0.125588	1.66342e-08		0.125588	5.82755e-09		0.125588	8.08839e-09		0.125588	1.13118e-08
0.128482	1.81899e-09		0.128482	1.45892e-09		0.128482	1.47266e-08		0.128482	5.68671e-09		0.128482	8.01852e-09		0.128482	1.12289e-08
0.131376	1.83604e-09		0.131376	1.48298e-09		0.131376	1.31191e-08		0.131376	5.5759e-09		0.131376	7.9627e-09		0.131376	1.11619e-08
0.13427	1.84955e-09		0.13427	1.5105e-09		0.13427	1.1751e-08		0.13427	5.4893e-09		0.13427	7.91749e-09		0.13427	1.11067e-08
0.137164	1.85984e-09		0.137164	1.54131e-09		0.137164	1.05784e-08		0.137164	5.42196e-09		0.137164	7.88017e-09		0.137164	1.106e-08
0.140058	1.86804e-09		0.140058	1.57511e-09		0.140058	9.56803e-09		0.140058	5.36975e-09		0.140058	7.84869e-09		0.140058	1.10195e-08
0.142952	1.87519e-09		0.142952	1.61157e-09		0.142952	8.6944e-09		0.142952	5.32925e-09		0.142952	7.82187e-09		0.142952	1.09835e-08
0.145846	1.8806e-09		0.145846	1.6503e-09		0.145846	7.93868e-09		0.145846	5.2977e-09		0.145846	7.79882e-09		0.145846	1.09505e-08
0.14874	1.88365e-09		0.14874	1.69088e-09		0.14874	7.28566e-09		0.14874	5.27289e-09		0.14874	7.77861e-09		0.14874	1.09198e-08
0.151633	1.88483e-09		0.151633	1.73282e-09		0.151633	6.72199e-09		0.151633	5.25309e-09		0.151633	7.76055e-09		0.151633	1.08906e-08
0.154527	1.88475e-09		0.154527	1.77571e-09		0.154527	6.23642e-09		0.154527	5.23697e-09		0.154527	7.74418e-09		0.154527	1.08624e-08
0.157421	1.88399e-09		0.157421	1.81912e-09		0.157421	5.82084e-09		0.157421	5.2235e-09		0.157421	7.72915e-09		0.157421	1.0835e-08
0.160315	1.88306e-09		0.160315	1.86271e-09		0.160315	5.46754e-09		0.160315	5.21192e-09		0.160315	7.71526e-09		0.160315	1.0808e-08
0.163209	1.88238e-09		0.163209	1.90617e-09		0.163209	5.16677e-09		0.163209	5.20166e-09		0.163209	7.70232e-09		0.163209	1.07814e-08
0.166103	1.88286e-09		0.166103	1.9499e-09		0.166103	4.90586e-09		0.166103	5.19225e-09		0.166103	7.69009e-09		0.166103	1.07549e-08
0.166103	1.88286e-09		0.166103	1.9499e-09		0.166103	4.90586e-09		0.166103	5.19225e-09		0.166103	7.69009e-09		0.166103	1.07549e-08
0.168997	1.88528e-09		0.168997	1.99369e-09		0.168997	4.67484e-09		0.168997	5.18304e-09		0.168997	7.67683e-09		0.168997	1.07288e-08
0.171891	1.8897e-09		0.171891	2.03727e-09		0.171891	4.46895e-09		0.171891	5.17355e-09		0.171891	7.66128e-09		0.171891	1.07028e-08
0.174785	1.89602e-09		0.174785	2.08049e-09		0.174785	4.28542e-09		0.174785	5.16376e-09		0.174785	7.64397e-09		0.174785	1.06771e-08
0.177678	1.90418e-09		0.177678	2.12266e-09		0.177678	4.1216e-09		0.177678	5.15367e-09		0.177678	7.62524e-09		0.177678	1.06517e-08
0.180572	1.91431e-09		0.180572	2.16394e-09		0.180572	3.97526e-09		0.180572	5.14328e-09		0.180572	7.6053e-09		0.180572	1.06264e-08
0.183466	1.92646e-09		0.183466	2.20469e-09		0.183466	3.84437e-09		0.183466	5.13259e-09		0.183466	7.58429e-09		0.183466	1.06014e-08
0.18636	1.94071e-09		0.18636	2.24533e-09		0.18636	3.727e-09		0.18636	5.12164e-09		0.18636	7.56232e-09		0.18636	1.05764e-08
0.189254	1.95737e-09		0.189254	2.28627e-09		0.189254	3.62151e-09		0.189254	5.11043e-09		0.189254	7.53945e-09		0.189254	1.05509e-08
0.192148	1.9761e-09		0.192148	2.32844e-09		0.192148	3.52646e-09		0.192148	5.09899e-09		0.192148	7.51572e-09		0.192148	1.05257e-08
0.195042	1.9963e-09		0.195042	2.37215e-09		0.195042	3.44069e-09		0.195042	5.08736e-09		0.195042	7.49117e-09		0.195042	1.05013e-08
0.197936	2.01816e-09		0.197936	2.41767e-09		0.197936	3.36319e-09		0.197936	5.07555e-09		0.197936	7.4658e-09		0.197936	1.04773e-08
0.20083	2.04192e-09		0.20083	2.4659e-09		0.20083	3.29302e-09		0.20083	5.06359e-09		0.20083	7.43961e-09		0.20083	1.04535e-08
0.203723	2.06779e-09		0.203723	2.51658e-09		0.203723	3.22929e-09		0.203723	5.05149e-09		0.203723	7.4126e-09		0.203723	1.04297e-08
0.206617	2.09597e-09		0.206617	2.56954e-09		0.206617	3.17055e-09		0.206617	5.03928e-09		0.206617	7.38473e-09		0.206617	1.04062e-08
0.209511	2.12658e-09		0.209511	2.62559e-09		0.209511	3.11576e-09		0.209511	5.02698e-09		0.209511	7.35595e-09		0.209511	1.03829e-08
0.212405	2.1597e-09		0.212405	2.68573e-09		0.212405	3.0648e-09		0.212405	5.01461e-09		0.212405	7.32616e-09		0.212405	1.03602e-08
0.215299	2.19535e-09		0.215299	2.75096e-09		0.215299	3.01754e-09		0.215299	5.0022e-09		0.215299	7.29518e-09		0.215299	1.0339e-08
0.215299	2.19535e-09		0.215299	2.75096e-09		0.215299	3.01754e-09		0.215299	5.0022e-09		0.215299	7.29518e-09		0.215299	1.0339e-08
0.218193	2.2339e-09		0.218193	2.82223e-09		0.218193	2.97341e-09		0.218193	4.98963e-09		0.218193	7.26343e-09		0.218193	1.0318e-08
0.221087	2.27572e-09		0.221087	2.90044e-09		0.221087	2.93164e-09		0.221087	4.97674e-09		0.221087	7.23163e-09		0.221087	1.02951e-08
0.223981	2.32072e-09		0.223981	2.98643e-09		0.223981	2.8919e-09		0.223981	4.96344e-09		0.223981	7.2e-09		0.223981	1.02698e-08
0.226875	2.36871e-09		0.226875	3.08149e-09		0.226875	2.8541e-09		0.226875	4.94972e-09		0.226875	7.16858e-09		0.226875	1.02422e-08
0.229768	2.41957e-09		0.229768	3.18683e-09		0.229768	2.81823e-09		0.229768	4.9356e-09		0.229768	7.13797e-09		0.229768	1.02125e-08
0.232662	2.47325e-09		0.232662	3.30234e-09		0.232662	2.78432e-09		0.232662	4.92122e-09		0.232662	7.10862e-09		0.232662	1.01809e-08
0.235556	2.53002e-09		0.235556	3.42837e-09		0.235556	2.75241e-09		0.235556	4.90671e-09		0.235556	7.08025e-09		0.235556	1.01476e-08
0.23845	2.58931e-09		0.23845	3.56552e-09		0.23845	2.72254e-09		0.23845	4.89208e-09		0.23845	7.05269e-09		0.23845	1.01128e-08
0.241344	2.65124e-09		0.241344	3.71459e-09		0.241344	2.69475e-09		0.241344	4.87733e-09		0.241344	7.02579e-09		0.241344	1.00766e-08
0.244238	2.71665e-09		0.244238	3.87701e-09		0.244238	2.66863e-09		0.244238	4.86248e-09		0.244238	6.99945e-09		0.244238	1.00392e-08
0.247132	2.78555e-09		0.247132	4.05286e-09		0.247132	2.6436e-09		0.247132	4.84755e-09		0.247132	6.9736e-09		0.247132	1.00007e-08
0.250026	2.8582e-09		0.250026	4.2421e-09		0.250026	2.61946e-09		0.250026	4.83253e-09		0.250026	6.94816e-09		0.250026	9.96104e-09
0.25292	2.93499e-09		0.25292	4.44551e-09		0.25292	2.59614e-09		0.25292	4.81744e-09		0.25292	6.92309e-09		0.25292	9.92035e-09
0.255814	3.01631e-09		0.255814	4.66454e-09		0.255814	2.57366e-09		0.255814	4.80229e-09		0.255814	6.89837e-09		0.255814	9.87865e-09
0.258707	3.10261e-09		0.258707	4.89989e-09		0.258707	2.55202e-09		0.258707	4.78708e-09		0.258707	6.87397e-09		0.258707	9.83602e-09
0.261601	3.19422e-09		0.261601	5.15185e-09		0.261601	2.53127e-09		0.261601	4.77182e-09		0.261601	6.84988e-09		0.261601	9.79249e-09
0.264495	3.29194e-09		0.264495	5.42146e-09		0.264495	2.5114e-09		0.264495	4.75652e-09		0.264495	6.8261e-09		0.264495	9.74814e-09
0.267389	3.39709e-09		0.267389	5.70972e-09		0.267389	2.49241e-09		0.267389	4.74119e-09		0.267389	6.80263e-09		0.267389	9.70301e-09
0.270283	3.51077e-09		0.270283	6.01777e-09		0.270283	2.47427e-09		0.270283	4.72582e-09		0.270283	6.77949e-09		0.270283	9.65713e-09
0.273177	3.63398e-09		0.273177	6.34612e-09		0.273177	2.45696e-09		0.273177	4.71044e-09		0.273177	6.75671e-09		0.273177	9.61054e-09
0.276071	3.7677e-09		0.276071	6.69392e-09		0.276071	2.44041e-09		0.276071	4.69503e-09		0.276071	6.73433e-09		0.276071	9.56328e-09
0.278965	3.91256e-09		0.278965	7.06044e-09		0.278965	2.4246e-09		0.278965	4.67961e-09		0.278965	6.71242e-09		0.278965	9.51538e-09
0.281859	4.06924e-09		0.281859	7.44576e-09		0.281859	2.40945e-09		0.281859	4.66418e-09		0.281859	6.69109e-09		0.281859	9.46685e-09
0.284752	4.23894e-09		0.284752	7.85147e-09		0.284752	2.39491e-09		0.284752	4.64874e-09		0.284752	6.67049e-09		0.284752	9.41773e-09
0.287646	4.423e-09		0.287646	8.27897e-09		0.287646	2.38092e-09		0.287646	4.63331e-09		0.287646	6.6508e-09		0.287646	9.36802e-09
0.29054	4.62276e-09		0.29054	8.72874e-09		0.29054	2.36741e-09		0.29054	4.61787e-09		0.29054	6.63217e-09		0.29054	9.31774e-09
0.293434	4.83948e-09		0.293434	9.20314e-09		0.293434	2.35432e-09		0.293434	4.60245e-09		0.293434	6.61319e-09		0.293434	9.26691e-09
0.296328	5.07432e-09		0.296328	9.70522e-09		0.296328	2.34161e-09		0.296328	4.58703e-09		0.296328	6.59252e-09		0.296328	9.21553e-09
0.299222	5.32856e-09		0.299222	1.02363e-08		0.299222	2.32899e-09		0.299222	4.57162e-09		0.299222	6.57032e-09		0.299222	9.16345e-09
0.302116	5.60349e-09		0.302116	1.0798e-08		0.302116	2.31609e-09		0.302116	4.55622e-09		0.302116	6.54669e-09		0.302116	9.11052e-09
0.30501	5.90016e-09		0.30501	1.1394e-08		0.30501	2.30272e-09		0.30501	4.54082e-09		0.30501	6.52163e-09		0.30501	9.05675e-09
0.307904	6.21971e-09		0.307904	1.20283e-08		0.307904	2.28866e-09		0.307904	4.52542e-09		0.307904	6.49513e-09		0.307904	9.00212e-09
0.310797	6.56369e-09		0.310797	1.27046e-08		0.310797	2.27368e-09		0.310797	4.51002e-09		0.310797	6.46716e-09		0.310797	8.94663e-09
0.313691	6.93351e-09		0.313691	1.34263e-08		0.313691	2.25759e-09		0.313691	4.49477e-09		0.313691	6.43772e-09		0.313691	8.8903e-09
0.313691	6.93351e-09		0.313691	1.34263e-08		0.313691	2.25759e-09		0.313691	4.49477e-09		0.313691	6.43772e-09		0.313691	8.8903e-09
0.316585	7.33051e-09		0.316585	1.41968e-08		0.316585	2.24197e-09		0.316585	4.47956e-09		0.316585	6.40765e-09		0.316585	8.83383e-09
0.319479	7.75618e-09		0.319479	1.50192e-08		0.319479	2.22834e-09		0.319479	4.4641e-09		0.319479	6.3777e-09		0.319479	8.77785e-09
0.322373	8.21304e-09		0.322373	1.58971e-08		0.322373	2.21633e-09		0.322373	4.44845e-09		0.322373	6.3477e-09		0.322373	8.72223e-09
0.325267	8.70324e-09		0.325267	1.68348e-08		0.325267	2.2056e-09		0.325267	4.43266e-09		0.325267	6.31751e-09		0.325267	8.66687e-09
0.328161	9.22934e-09		0.328161	1.78383e-08		0.328161	2.19588e-09		0.328161	4.41676e-09		0.328161	6.28704e-09		0.328161	8.61168e-09
0.331055	9.79554e-09		0.331055	1.89137e-08		0.331055	2.18697e-09		0.331055	4.40076e-09		0.331055	6.25624e-09		0.331055	8.55656e-09
0.333949	1.04064e-08		0.333949	2.00688e-08		0.333949	2.17871e-09		0.333949	4.38469e-09		0.333949	6.22506e-09		0.333949	8.50144e-09
0.336842	1.10663e-08		0.336842	2.13123e-08		0.336842	2.17098e-09		0.336842	4.36857e-09		0.336842	6.19348e-09		0.336842	8.44624e-09
0.339736	1.17802e-08		0.339736	2.26491e-08		0.339736	2.16371e-09		0.339736	4.35239e-09		0.339736	6.16146e-09		0.339736	8.39091e-09
0.34263	1.25539e-08		0.34263	2.40852e-08		0.34263	2.15682e-09		0.34263	4.33616e-09		0.34263	6.12897e-09		0.34263	8.33599e-09
0.345524	1.33934e-08		0.345524	2.56339e-08		0.345524	2.15027e-09		0.345524	4.3199e-09		0.345524	6.09597e-09		0.345524	8.282e-09
0.348418	1.43039e-08		0.348418	2.7307e-08		0.348418	2.14403e-09		0.348418	4.3036e-09		0.348418	6.06298e-09		0.348418	8.22891e-09
0.351312	1.52904e-08		0.351312	2.91225e-08		0.351312	2.13805e-09		0.351312	4.28726e-09		0.351312	6.03051e-09		0.351312	8.17673e-09
0.354206	1.63569e-08		0.354206	3.11103e-08		0.354206	2.13232e-09		0.354206	4.2709e-09		0.354206	5.9986e-09		0.354206	8.12546e-09
0.3571	1.75078e-08		0.3571	3.33013e-08		0.3571	2.12681e-09		0.3571	4.25451e-09		0.3571	5.96729e-09		0.3571	8.07514e-09
0.359994	1.87466e-08		0.359994	3.57291e-08		0.359994	2.1215e-09		0.359994	4.23808e-09		0.359994	5.93662e-09		0.359994	8.0258e-09
0.362887	2.00757e-08		0.362887	3.84344e-08		0.362887	2.11637e-09		0.362887	4.22163e-09		0.362887	5.90664e-09		0.362887	7.97749e-09
0.365781	2.14997e-08		0.365781	4.14373e-08		0.365781	2.11142e-09		0.365781	4.20515e-09		0.365781	5.87738e-09		0.365781	7.93025e-09
0.368675	2.30262e-08		0.368675	4.48502e-08		0.368675	2.10662e-09		0.368675	4.18864e-09		0.368675	5.84889e-09		0.368675	7.88414e-09
0.371569	2.46682e-08		0.371569	4.88134e-08		0.371569	2.10196e-09		0.371569	4.17209e-09		0.371569	5.82121e-09		0.371569	7.83923e-09
0.374463	2.64393e-08		0.374463	5.34622e-08		0.374463	2.09744e-09		0.374463	4.1555e-09		0.374463	5.79438e-09		0.374463	7.79557e-09
0.377357	2.8351e-08		0.377357	5.89846e-08		0.377357	2.09303e-09		0.377357	4.13887e-09		0.377357	5.76847e-09		0.377357	7.75341e-09
0.380251	3.04139e-08		0.380251	6.56433e-08		0.380251	2.08876e-09		0.380251	4.12217e-09		0.380251	5.74351e-09		0.380251	7.71248e-09
0.383145	3.26421e-08		0.383145	7.37035e-08		0.383145	2.08463e-09		0.383145	4.1055e-09		0.383145	5.71957e-09		0.383145	7.67233e-09
0.386039	3.50543e-08		0.386039	8.29729e-08		0.386039	2.08069e-09		0.386039	4.08893e-09		0.386039	5.69671e-09		0.386039	7.63292e-09
0.388932	3.76725e-08		0.388932	9.31929e-08		0.388932	2.077e-09		0.388932	4.07245e-09		0.388932	5.67502e-09		0.388932	7.59422e-09
0.391826	4.05365e-08		0.391826	1.03534e-07		0.391826	2.07369e-09		0.391826	4.05607e-09		0.391826	5.65461e-09		0.391826	7.55624e-09
0.39472	4.36747e-08		0.39472	1.1308e-07		0.39472	2.07093e-09		0.39472	4.03976e-09		0.39472	5.63563e-09		0.39472	7.51898e-09
0.397614	4.71673e-08		0.397614	1.21815e-07		0.397614	2.06901e-09		0.397614	4.02352e-09		0.397614	5.61712e-09		0.397614	7.48241e-09
0.400508	5.11071e-08		0.400508	1.29579e-07		0.400508	2.06833e-09		0.400508	4.00733e-09		0.400508	5.59789e-09		0.400508	7.44656e-09
0.403402	5.56061e-08		0.403402	1.3606e-07		0.403402	2.06938e-09		0.403402	3.99116e-09		0.403402	5.57768e-09		0.403402	7.41131e-09
0.403402	5.56061e-08		0.403402	1.3606e-07		0.403402	2.06938e-09		0.403402	3.99116e-09		0.403402	5.57768e-09		0.403402	7.41131e-09
0.406296	6.08878e-08		0.406296	1.41222e-07		0.406296	2.07049e-09		0.406296	3.97499e-09		0.406296	5.55662e-09		0.406296	7.37589e-09
0.40919	6.72392e-08		0.40919	1.45195e-07		0.40919	2.06982e-09		0.40919	3.95879e-09		0.40919	5.53489e-09		0.40919	7.33951e-09
0.412084	7.48363e-08		0.412084	1.48103e-07		0.412084	2.06771e-09		0.412084	3.94253e-09		0.412084	5.51243e-09		0.412084	7.30201e-09
0.414977	8.34873e-08		0.414977	1.50115e-07		0.414977	2.06437e-09		0.414977	3.92621e-09		0.414977	5.48924e-09		0.414977	7.26333e-09
0.417871	9.2317e-08		0.417871	1.51103e-07		0.417871	2.05998e-09		0.417871	3.90983e-09		0.417871	5.46532e-09		0.417871	7.22344e-09
0.420765	1.00614e-07		0.420765	1.51096e-07		0.420765	2.0547e-09		0.420765	3.89338e-09		0.420765	5.44066e-09		0.420765	7.18264e-09
0.423659	1.08113e-07		0.423659	1.50514e-07		0.423659	2.04868e-09		0.423659	3.87689e-09		0.423659	5.4153e-09		0.423659	7.14131e-09
0.426553	1.1461e-07		0.426553	1.49306e-07		0.426553	2.04206e-09		0.426553	3.86035e-09		0.426553	5.38925e-09		0.426553	7.09945e-09
0.429447	1.20031e-07		0.429447	1.47359e-07		0.429447	2.03496e-09		0.429447	3.8438e-09		0.429447	5.36254e-09		0.429447	7.05709e-09
0.432341	1.24288e-07		0.432341	1.44835e-07		0.432341	2.02754e-09		0.432341	3.82725e-09		0.432341	5.33521e-09		0.432341	7.01429e-09
0.435235	1.2729e-07		0.435235	1.4185e-07		0.435235	2.01983e-09		0.435235	3.81073e-09		0.435235	5.3073e-09		0.435235	6.97108e-09
0.438129	1.29201e-07		0.438129	1.38473e-07		0.438129	2.0118e-09		0.438129	3.79428e-09		0.438129	5.27885e-09		0.438129	6.9275e-09
0.441023	1.3008e-07		0.441023	1.34799e-07		0.441023	2.00348e-09		0.441023	3.77791e-09		0.441023	5.2499e-09		0.441023	6.88358e-09
0.443916	1.30235e-07		0.443916	1.30843e-07		0.443916	1.99486e-09		0.443916	3.76167e-09		0.443916	5.2205e-09		0.443916	6.83936e-09
0.44681	1.29687e-07		0.44681	1.26651e-07		0.44681	1.98594e-09		0.44681	3.74545e-09		0.44681	5.19073e-09		0.44681	6.79485e-09
0.449704	1.28165e-07		0.449704	1.22336e-07		0.449704	1.97676e-09		0.449704	3.72919e-09		0.449704	5.16067e-09		0.449704	6.75007e-09
0.452598	1.26004e-07		0.452598	1.17905e-07		0.452598	1.9674e-09		0.452598	3.71287e-09		0.452598	5.13038e-09		0.452598	6.70503e-09
0.455492	1.2339e-07		0.455492	1.13376e-07		0.455492	1.95789e-09		0.455492	3.69652e-09		0.455492	5.09992e-09		0.455492	6.65974e-09
0.458386	1.2034e-07		0.458386	1.08826e-07		0.458386	1.9483e-09		0.458386	3.68015e-09		0.458386	5.06932e-09		0.458386	6.61438e-09
0.46128	1.16935e-07		0.46128	1.04302e-07		0.46128	1.93867e-09		0.46128	3.66375e-09		0.46128	5.03864e-09		0.46128	6.56913e-09
0.464174	1.13314e-07		0.464174	9.98305e-08		0.464174	1.92905e-09		0.464174	3.64733e-09		0.464174	5.00793e-09		0.464174	6.524e-09
0.467068	1.09501e-07		0.467068	9.54197e-08		0.467068	1.91947e-09		0.467068	3.63091e-09		0.467068	4.97722e-09		0.467068	6.47901e-09
0.469961	1.05548e-07		0.469961	9.10832e-08		0.469961	1.90997e-09		0.469961	3.61449e-09		0.469961	4.94654e-09		0.469961	6.43416e-09
0.472855	1.015e-07		0.472855	8.68467e-08		0.472855	1.90057e-09		0.472855	3.59807e-09		0.472855	4.91593e-09		0.472855	6.38946e-09
0.475749	9.74035e-08		0.475749	8.27252e-08		0.475749	1.89132e-09		0.475749	3.58167e-09		0.475749	4.8854e-09		0.475749	6.34491e-09
0.478643	9.32664e-08		0.478643	7.87259e-08		0.478643	1.88223e-09		0.478643	3.56528e-09		0.478643	4.85498e-09		0.478643	6.3005e-09
0.481537	8.91187e-08		0.481537	7.48465e-08		0.481537	1.87334e-09		0.481537	3.54892e-09		0.481537	4.82466e-09		0.481537	6.25622e-09
0.484431	8.50118e-08		0.484431	7.11038e-08		0.484431	1.86466e-09		0.484431	3.53259e-09		0.484431	4.79446e-09		0.484431	6.21206e-09
0.487325	8.09674e-08		0.487325	6.75125e-08		0.487325	1.85624e-09		0.487325	3.51629e-09		0.487325	4.76437e-09		0.487325	6.16799e-09
0.490219	7.70346e-08		0.490219	6.40666e-08		0.490219	1.84809e-09		0.490219	3.50004e-09		0.490219	4.73438e-09		0.490219	6.12399e-09
0.493113	7.32264e-08		0.493113	6.07755e-08		0.493113	1.84025e-09		0.493113	3.48383e-09		0.493113	4.70473e-09		0.493113	6.08002e-09
0.496006	6.95336e-08		0.496006	5.76334e-08		0.496006	1.83275e-09		0.496006	3.46768e-09		0.496006	4.67566e-09		0.496006	6.03647e-09
0.4989	6.59567e-08		0.4989	5.46274e-08		0.4989	1.82563e-09		0.4989	3.45158e-09		0.4989	4.64718e-09		0.4989	5.99375e-09
0.501794	6.24961e-08		0.501794	5.17572e-08		0.501794	1.81892e-09		0.501794	3.43554e-09		0.501794	4.61933e-09		0.501794	5.95188e-09
0.504688	5.91697e-08		0.504688	4.90088e-08		0.504688	1.81267e-09		0.504688	3.41957e-09		0.504688	4.59211e-09		0.504688	5.9109e-09
0.507582	5.59875e-08		0.507582	4.63853e-08		0.507582	1.80692e-09		0.507582	3.40366e-09		0.507582	4.56556e-09		0.507582	5.87084e-09
0.510476	5.2932e-08		0.510476	4.39044e-08		0.510476	1.80172e-09		0.510476	3.3878e-09		0.510476	4.5397e-09		0.510476	5.83177e-09
0.51337	4.99965e-08		0.51337	4.15351e-08		0.51337	1.7971e-09		0.51337	3.372e-09		0.51337	4.51459e-09		0.51337	5.79376e-09
0.516264	4.71796e-08		0.516264	3.92562e-08		0.516264	1.79311e-09		0.516264	3.35625e-09		0.516264	4.49027e-09		0.516264	5.75691e-09
0.519158	4.44916e-08		0.519158	3.70902e-08		0.519158	1.78978e-09		0.519158	3.34055e-09		0.519158	4.46682e-09		0.519158	5.72134e-09
0.522051	4.19449e-08		0.522051	3.50728e-08		0.522051	1.78713e-09		0.522051	3.32491e-09		0.522051	4.44435e-09		0.522051	5.68724e-09
0.524945	3.95781e-08		0.524945	3.32153e-08		0.524945	1.78517e-09		0.524945	3.30932e-09		0.524945	4.42301e-09		0.524945	5.65483e-09
0.524945	3.95781e-08		0.524945	3.32153e-08		0.524945	1.78517e-09		0.524945	3.30932e-09		0.524945	4.42301e-09		0.524945	5.65483e-09
0.527839	3.73906e-08		0.527839	3.14801e-08		0.527839	1.78381e-09		0.527839	3.2938e-09		0.527839	4.4023e-09		0.527839	5.62313e-09
0.530733	3.53271e-08		0.530733	2.98407e-08		0.530733	1.78289e-09		0.530733	3.27836e-09		0.530733	4.38166e-09		0.530733	5.591e-09
0.533627	3.33725e-08		0.533627	2.82945e-08		0.533627	1.78233e-09		0.533627	3.263e-09		0.533627	4.36102e-09		0.533627	5.5583e-09
0.536521	3.15231e-08		0.536521	2.68379e-08		0.536521	1.78205e-09		0.536521	3.24773e-09		0.536521	4.34033e-09		0.536521	5.52538e-09
0.539415	2.97737e-08		0.539415	2.54678e-08		0.539415	1.7819e-09		0.539415	3.23255e-09		0.539415	4.31965e-09		0.539415	5.49264e-09
0.542309	2.81269e-08		0.542309	2.41786e-08		0.542309	1.78178e-09		0.542309	3.21746e-09		0.542309	4.29905e-09		0.542309	5.46004e-09
0.545203	2.65817e-08		0.545203	2.29637e-08		0.545203	1.78155e-09		0.545203	3.20247e-09		0.545203	4.2785e-09		0.545203	5.42753e-09
0.548096	2.5128e-08		0.548096	2.18192e-08		0.548096	1.78108e-09		0.548096	3.18757e-09		0.548096	4.25798e-09		0.548096	5.39506e-09
0.55099	2.37596e-08		0.55099	2.07397e-08		0.55099	1.78028e-09		0.55099	3.17277e-09		0.55099	4.23744e-09		0.55099	5.36255e-09
0.553884	2.2464e-08		0.553884	1.97169e-08		0.553884	1.77906e-09		0.553884	3.15808e-09		0.553884	4.21688e-09		0.553884	5.32998e-09
0.556778	2.12337e-08		0.556778	1.8747e-08		0.556778	1.77732e-09		0.556778	3.14349e-09		0.556778	4.19628e-09		0.556778	5.29729e-09
0.559672	2.00722e-08		0.559672	1.78312e-08		0.559672	1.77513e-09		0.559672	3.12902e-09		0.559672	4.17563e-09		0.559672	5.26446e-09
0.562566	1.89828e-08		0.562566	1.69675e-08		0.562566	1.77258e-09		0.562566	3.11467e-09		0.562566	4.15492e-09		0.562566	5.23144e-09
0.56546	1.79618e-08		0.56546	1.61534e-08		0.56546	1.76975e-09		0.56546	3.10044e-09		0.56546	4.13414e-09		0.56546	5.19821e-09
0.568354	1.69952e-08		0.568354	1.53947e-08		0.568354	1.76669e-09		0.568354	3.08628e-09		0.568354	4.11328e-09		0.568354	5.16473e-09
0.571248	1.60868e-08		0.571248	1.46793e-08		0.571248	1.7634e-09		0.571248	3.07213e-09		0.571248	4.09234e-09		0.571248	5.13097e-09
0.574142	1.5245e-08		0.574142	1.39997e-08		0.574142	1.75984e-09		0.574142	3.05797e-09		0.574142	4.07132e-09		0.574142	5.09688e-09
0.577035	1.44623e-08		0.577035	1.33662e-08		0.577035	1.75591e-09		0.577035	3.04381e-09		0.577035	4.05019e-09		0.577035	5.06276e-09
0.579929	1.37294e-08		0.579929	1.27761e-08		0.579929	1.7515e-09		0.579929	3.02965e-09		0.579929	4.02896e-09		0.579929	5.02893e-09
0.582823	1.30482e-08		0.582823	1.2223e-08		0.582823	1.74642e-09		0.582823	3.0155e-09		0.582823	4.00761e-09		0.582823	4.99543e-09
0.585717	1.24011e-08		0.585717	1.17026e-08		0.585717	1.74042e-09		0.585717	3.00138e-09		0.585717	3.98612e-09		0.585717	4.96227e-09
0.588611	1.17735e-08		0.588611	1.12132e-08		0.588611	1.73309e-09		0.588611	2.9873e-09		0.588611	3.96461e-09		0.588611	4.92948e-09
0.591505	1.11743e-08		0.591505	1.07539e-08		0.591505	1.72519e-09		0.591505	2.97328e-09		0.591505	3.94323e-09		0.591505	4.89707e-09
0.594399	1.06064e-08		0.594399	1.03213e-08		0.594399	1.71781e-09		0.594399	2.9593e-09		0.594399	3.922e-09		0.594399	4.86507e-09
0.597293	1.00788e-08		0.597293	9.90188e-09		0.597293	1.71101e-09		0.597293	2.94538e-09		0.597293	3.90091e-09		0.597293	4.83349e-09
0.600186	9.60063e-09		0.600186	9.48946e-09		0.600186	1.70465e-09		0.600186	2.93151e-09		0.600186	3.87998e-09		0.600186	4.80237e-09
0.60308	9.17029e-09		0.60308	9.08886e-09		0.60308	1.69858e-09		0.60308	2.91769e-09		0.60308	3.85921e-09		0.60308	4.77173e-09
0.605974	8.78679e-09		0.605974	8.70596e-09		0.605974	1.6927e-09		0.605974	2.90394e-09		0.605974	3.83863e-09		0.605974	4.7416e-09
0.608868	8.43527e-09		0.608868	8.34499e-09		0.608868	1.68696e-09		0.608868	2.89026e-09		0.608868	3.81823e-09		0.608868	4.712e-09
0.611762	8.09788e-09		0.611762	8.00632e-09		0.611762	1.68133e-09		0.611762	2.87665e-09		0.611762	3.79802e-09		0.611762	4.68295e-09
0.614656	7.7804e-09		0.614656	7.69053e-09		0.614656	1.67578e-09		0.614656	2.86311e-09		0.614656	3.77801e-09		0.614656	4.65445e-09
0.61755	7.47921e-09		0.61755	7.39703e-09		0.61755	1.67034e-09		0.61755	2.84966e-09		0.61755	3.75821e-09		0.61755	4.62639e-09
0.620444	7.18444e-09		0.620444	7.12172e-09		0.620444	1.66503e-09		0.620444	2.8363e-09		0.620444	3.73862e-09		0.620444	4.59895e-09
0.623338	6.89746e-09		0.623338	6.86237e-09		0.623338	1.65988e-09		0.623338	2.82303e-09		0.623338	3.71927e-09		0.623338	4.57229e-09
0.626231	6.62026e-09		0.626231	6.62175e-09		0.626231	1.65493e-09		0.626231	2.80985e-09		0.626231	3.70017e-09		0.626231	4.54632e-09
0.629125	6.3538e-09		0.629125	6.40533e-09		0.629125	1.65024e-09		0.629125	2.79677e-09		0.629125	3.68133e-09		0.629125	4.52102e-09
0.632019	6.09915e-09		0.632019	6.20364e-09		0.632019	1.64587e-09		0.632019	2.78378e-09		0.632019	3.66278e-09		0.632019	4.49641e-09
0.634913	5.85788e-09		0.634913	6.00371e-09		0.634913	1.64189e-09		0.634913	2.77087e-09		0.634913	3.64457e-09		0.634913	4.47255e-09
0.637807	5.63299e-09		0.637807	5.80854e-09		0.637807	1.63844e-09		0.637807	2.75805e-09		0.637807	3.62673e-09		0.637807	4.44955e-09
0.640701	5.42807e-09		0.640701	5.62268e-09		0.640701	1.63569e-09		0.640701	2.74532e-09		0.640701	3.60916e-09		0.640701	4.42761e-09
0.643595	5.24049e-09		0.643595	5.45114e-09		0.643595	1.63397e-09		0.643595	2.73269e-09		0.643595	3.59169e-09		0.643595	4.4072e-09
0.643595	5.24049e-09		0.643595	5.45114e-09		0.643595	1.63397e-09		0.643595	2.73269e-09		0.643595	3.59169e-09		0.643595	4.4072e-09
0.646489	5.06443e-09		0.646489	5.29367e-09		0.646489	1.6329e-09		0.646489	2.72015e-09		0.646489	3.57434e-09		0.646489	4.38768e-09
0.649383	4.89852e-09		0.649383	5.14654e-09		0.649383	1.63188e-09		0.649383	2.7077e-09		0.649383	3.55709e-09		0.649383	4.36816e-09
0.652277	4.7429e-09		0.652277	5.00893e-09		0.652277	1.63084e-09		0.652277	2.69535e-09		0.652277	3.53995e-09		0.652277	4.34864e-09
0.65517	4.59685e-09		0.65517	4.87947e-09		0.65517	1.62969e-09		0.65517	2.68308e-09		0.65517	3.5229e-09		0.65517	4.32897e-09
0.658064	4.45938e-09		0.658064	4.75662e-09		0.658064	1.62835e-09		0.658064	2.67091e-09		0.658064	3.50594e-09		0.658064	4.30904e-09
0.660958	4.32989e-09		0.660958	4.63907e-09		0.660958	1.62673e-09		0.660958	2.65883e-09		0.660958	3.48906e-09		0.660958	4.28871e-09
0.663852	4.20785e-09		0.663852	4.52587e-09		0.663852	1.62473e-09		0.663852	2.64685e-09		0.663852	3.47223e-09		0.663852	4.26783e-09
0.666746	4.09207e-09		0.666746	4.41618e-09		0.666746	1.62235e-09		0.666746	2.63497e-09		0.666746	3.45543e-09		0.666746	4.24664e-09
0.66964	3.98133e-09		0.66964	4.31023e-09		0.66964	1.61971e-09		0.66964	2.62318e-09		0.66964	3.43865e-09		0.66964	4.22541e-09
0.672534	3.87534e-09		0.672534	4.20851e-09		0.672534	1.61695e-09		0.672534	2.61149e-09		0.672534	3.42188e-09		0.672534	4.20414e-09
0.675428	3.77391e-09		0.675428	4.11085e-09		0.675428	1.61413e-09		0.675428	2.5999e-09		0.675428	3.40509e-09		0.675428	4.18281e-09
0.678322	3.67684e-09		0.678322	4.01709e-09		0.678322	1.61127e-09		0.678322	2.58841e-09		0.678322	3.38826e-09		0.678322	4.16143e-09
0.681215	3.58402e-09		0.681215	3.92724e-09		0.681215	1.60836e-09		0.681215	2.57704e-09		0.681215	3.37139e-09		0.681215	4.13997e-09
0.684109	3.49543e-09		0.684109	3.84031e-09		0.684109	1.60537e-09		0.684109	2.56577e-09		0.684109	3.35446e-09		0.684109	4.11843e-09
0.687003	3.41112e-09		0.687003	3.75507e-09		0.687003	1.60231e-09		0.687003	2.55462e-09		0.687003	3.33744e-09		0.687003	4.0968e-09
0.689897	3.33119e-09		0.689897	3.67134e-09		0.689897	1.59918e-09		0.689897	2.54361e-09		0.689897	3.32033e-09		0.689897	4.07508e-09
0.692791	3.25675e-09		0.692791	3.58909e-09		0.692791	1.59597e-09		0.692791	2.53267e-09		0.692791	3.30309e-09		0.692791	4.05326e-09
0.695685	3.18649e-09		0.695685	3.50835e-09		0.695685	1.5927e-09		0.695685	2.52176e-09		0.695685	3.2858e-09		0.695685	4.03133e-09
0.698579	3.1179e-09		0.698579	3.42921e-09		0.698579	1.58939e-09		0.698579	2.51086e-09		0.698579	3.26858e-09		0.698579	4.0093e-09
0.701473	3.05092e-09		0.701473	3.35246e-09		0.701473	1.58607e-09		0.701473	2.49998e-09		0.701473	3.25143e-09		0.701473	3.98718e-09
0.704367	2.98572e-09		0.704367	3.27903e-09		0.704367	1.58277e-09		0.704367	2.48909e-09		0.704367	3.23436e-09		0.704367	3.96498e-09
0.70726	2.92251e-09		0.70726	3.20946e-09		0.70726	1.57956e-09		0.70726	2.47822e-09		0.70726	3.21737e-09		0.70726	3.94274e-09
0.710154	2.86241e-09		0.710154	3.14454e-09		0.710154	1.5765e-09		0.710154	2.46734e-09		0.710154	3.20048e-09		0.710154	3.92054e-09
0.713048	2.80684e-09		0.713048	3.0854e-09		0.713048	1.57371e-09		0.713048	2.45644e-09		0.713048	3.18373e-09		0.713048	3.89847e-09
0.715942	2.75685e-09		0.715942	3.03366e-09		0.715942	1.57132e-09		0.715942	2.44553e-09		0.715942	3.16717e-09		0.715942	3.87699e-09
0.715942	2.75685e-09		0.715942	3.03366e-09		0.715942	1.57132e-09		0.715942	2.44553e-09		0.715942	3.16717e-09		0.715942	3.87699e-09
0.718836	2.71103e-09		0.718836	2.98734e-09		0.718836	1.56911e-09		0.718836	2.4346e-09		0.718836	3.15069e-09		0.718836	3.85595e-09
0.72173	2.66732e-09		0.72173	2.94346e-09		0.72173	1.56678e-09		0.72173	2.42365e-09		0.72173	3.13415e-09		0.72173	3.83482e-09
0.724624	2.62568e-09		0.724624	2.9019e-09		0.724624	1.56433e-09		0.724624	2.41267e-09		0.724624	3.11754e-09		0.724624	3.81356e-09
0.727518	2.58605e-09		0.727518	2.86251e-09		0.727518	1.56174e-09		0.727518	2.40166e-09		0.727518	3.10085e-09		0.727518	3.79211e-09
0.730412	2.54833e-09		0.730412	2.82506e-09		0.730412	1.55902e-09		0.730412	2.3906e-09		0.730412	3.08406e-09		0.730412	3.77042e-09
0.733305	2.51231e-09		0.733305	2.78928e-09		0.733305	1.55615e-09		0.733305	2.37948e-09		0.733305	3.06714e-09		0.733305	3.74842e-09
0.736199	2.4778e-09		0.736199	2.75494e-09		0.736199	1.55311e-09		0.736199	2.3683e-09		0.736199	3.05008e-09		0.736199	3.72605e-09
0.739093	2.44469e-09		0.739093	2.72179e-09		0.739093	1.5499e-09		0.739093	2.35704e-09		0.739093	3.03285e-09		0.739093	3.70325e-09
0.741987	2.41289e-09		0.741987	2.68979e-09		0.741987	1.54649e-09		0.741987	2.34568e-09		0.741987	3.01544e-09		0.741987	3.67996e-09
0.744881	2.38231e-09		0.744881	2.6589e-09		0.744881	1.54287e-09		0.744881	2.3342e-09		0.744881	2.99781e-09		0.744881	3.65612e-09
0.747775	2.35284e-09		0.747775	2.62896e-09		0.747775	1.53902e-09		0.747775	2.32258e-09		0.747775	2.97994e-09		0.747775	3.63167e-09
0.750669	2.32441e-09		0.750669	2.59973e-09		0.750669	1.53491e-09		0.750669	2.31081e-09		0.750669	2.96178e-09		0.750669	3.60653e-09
0.753563	2.29691e-09		0.753563	2.57101e-09		0.753563	1.53051e-09		0.753563	2.29886e-09		0.753563	2.94322e-09		0.753563	3.58064e-09
0.756457	2.27027e-09		0.756457	2.54258e-09		0.756457	1.5258e-09		0.756457	2.2867e-09		0.756457	2.92419e-09		0.756457	3.55394e-09
0.75935	2.24427e-09		0.75935	2.5142e-09		0.75935	1.52074e-09		0.75935	2.27426e-09		0.75935	2.90464e-09		0.75935	3.52635e-09
0.762244	2.21872e-09		0.762244	2.48564e-09		0.762244	1.5153e-09		0.762244	2.26144e-09		0.762244	2.88454e-09		0.762244	3.49778e-09
0.765138	2.19354e-09		0.765138	2.45665e-09		0.765138	1.50942e-09		0.765138	2.24818e-09		0.765138	2.86382e-09		0.765138	3.46814e-09
0.768032	2.16866e-09		0.768032	2.42742e-09		0.768032	1.50315e-09		0.768032	2.23444e-09		0.768032	2.84245e-09		0.768032	3.43738e-09
0.770926	2.14401e-09		0.770926	2.39819e-09		0.770926	1.49657e-09		0.770926	2.2202e-09		0.770926	2.82038e-09		0.770926	3.40546e-09
0.77382	2.1195e-09		0.77382	2.3688e-09		0.77382	1.48966e-09		0.77382	2.20542e-09		0.77382	2.79757e-09		0.77382	3.37234e-09
0.776714	2.09501e-09		0.776714	2.33913e-09		0.776714	1.48243e-09		0.776714	2.19007e-09		0.776714	2.774e-09		0.776714	3.33802e-09
0.779608	2.07041e-09		0.779608	2.30905e-09		0.779608	1.47485e-09		0.779608	2.17414e-09		0.779608	2.74964e-09		0.779608	3.30249e-09
0.782502	2.04567e-09		0.782502	2.27862e-09		0.782502	1.46689e-09		0.782502	2.15762e-09		0.782502	2.7245e-09		0.782502	3.2658e-09
0.785396	2.02082e-09		0.785396	2.24798e-09		0.785396	1.45855e-09		0.785396	2.14051e-09		0.785396	2.69858e-09		0.785396	3.22799e-09
0.788289	1.99592e-09		0.788289	2.21716e-09		0.788289	1.4498e-09		0.788289	2.1228e-09		0.788289	2.6719e-09		0.788289	3.18914e-09
0.791183	1.97099e-09		0.791183	2.18651e-09		0.791183	1.44061e-09		0.791183	2.10453e-09		0.791183	2.6445e-09		0.791183	3.14934e-09
0.794077	1.94602e-09		0.794077	2.15643e-09		0.794077	1.43096e-09		0.794077	2.08569e-09		0.794077	2.61642e-09		0.794077	3.10871e-09
0.796971	1.92108e-09		0.796971	2.12703e-09		0.796971	1.4208e-09		0.796971	2.06631e-09		0.796971	2.5877e-09		0.796971	3.06738e-09
0.799865	1.89623e-09		0.799865	2.09837e-09		0.799865	1.41008e-09		0.799865	2.0464e-09		0.799865	2.55837e-09		0.799865	3.02541e-09
0.799865	1.89623e-09		0.799865	2.09837e-09		0.799865	1.41008e-09		0.799865	2.0464e-09		0.799865	2.55837e-09		0.799865	3.02541e-09
0.802759	1.87147e-09		0.802759	2.06988e-09		0.802759	1.39883e-09		0.802759	2.0259e-09		0.802759	2.52835e-09		0.802759	2.98264e-09
0.805653	1.84681e-09		0.805653	2.04105e-09		0.805653	1.38709e-09		0.805653	2.00474e-09		0.805653	2.49753e-09		0.805653	2.93884e-09
0.808547	1.82231e-09		0.808547	2.01191e-09		0.808547	1.37484e-09		0.808547	1.98291e-09		0.808547	2.46594e-09		0.808547	2.89401e-09
0.811441	1.79803e-09		0.811441	1.98252e-09		0.811441	1.36204e-09		0.811441	1.96043e-09		0.811441	2.4336e-09		0.811441	2.84818e-09
0.814334	1.77398e-09		0.814334	1.95298e-09		0.814334	1.34867e-09		0.814334	1.9373e-09		0.814334	2.40053e-09		0.814334	2.80134e-09
0.817228	1.75019e-09		0.817228	1.92337e-09		0.817228	1.33474e-09		0.817228	1.9135e-09		0.817228	2.36676e-09		0.817228	2.75361e-09
0.820122	1.72664e-09		0.820122	1.89361e-09		0.820122	1.32021e-09		0.820122	1.88907e-09		0.820122	2.33233e-09		0.820122	2.7051e-09
0.823016	1.70331e-09		0.823016	1.86362e-09		0.823016	1.30496e-09		0.823016	1.86399e-09		0.823016	2.29728e-09		0.823016	2.65578e-09
0.82591	1.68017e-09		0.82591	1.8333e-09		0.82591	1.28896e-09		0.82591	1.83828e-09		0.82591	2.26167e-09		0.82591	2.60561e-09
0.828804	1.65719e-09		0.828804	1.80256e-09		0.828804	1.27222e-09		0.828804	1.81198e-09		0.828804	2.22551e-09		0.828804	2.55457e-09
0.831698	1.63435e-09		0.831698	1.77132e-09		0.831698	1.25482e-09		0.831698	1.78509e-09		0.831698	2.18887e-09		0.831698	2.50263e-09
0.834592	1.61163e-09		0.834592	1.73972e-09		0.834592	1.23684e-09		0.834592	1.75763e-09		0.834592	2.15179e-09		0.834592	2.44999e-09
0.837486	1.58903e-09		0.837486	1.70792e-09		0.837486	1.21837e-09		0.837486	1.7296e-09		0.837486	2.11435e-09		0.837486	2.39686e-09
0.840379	1.56659e-09		0.840379	1.67588e-09		0.840379	1.19952e-09		0.840379	1.70107e-09		0.840379	2.07659e-09		0.840379	2.34327e-09
0.843273	1.54432e-09		0.843273	1.64358e-09		0.843273	1.18041e-09		0.843273	1.67211e-09		0.843273	2.0386e-09		0.843273	2.28922e-09
0.846167	1.52222e-09		0.846167	1.61098e-09		0.846167	1.16123e-09		0.846167	1.64283e-09		0.846167	2.00047e-09		0.846167	2.23472e-09
0.849061	1.50035e-09		0.849061	1.57808e-09		0.849061	1.14193e-09		0.849061	1.61334e-09		0.849061	1.96236e-09		0.849061	2.18021e-09
0.851955	1.47874e-09		0.851955	1.54503e-09		0.851955	1.12247e-09		0.851955	1.58381e-09		0.851955	1.92442e-09		0.851955	2.12625e-09
0.854849	1.45746e-09		0.854849	1.5123e-09		0.854849	1.10298e-09		0.854849	1.55449e-09		0.854849	1.88686e-09		0.854849	2.07305e-09
0.857743	1.43658e-09		0.857743	1.48032e-09		0.857743	1.08365e-09		0.857743	1.52567e-09		0.857743	1.84999e-09		0.857743	2.02083e-09
0.860637	1.41641e-09		0.860637	1.44927e-09		0.860637	1.0647e-09		0.860637	1.4976e-09		0.860637	1.81416e-09		0.860637	1.96986e-09
0.863531	1.39728e-09		0.863531	1.41941e-09		0.863531	1.04643e-09		0.863531	1.47061e-09		0.863531	1.77973e-09		0.863531	1.92072e-09
0.866424	1.37949e-09		0.866424	1.39118e-09		0.866424	1.02918e-09		0.866424	1.44519e-09		0.866424	1.74725e-09		0.866424	1.87464e-09
0.869318	1.36347e-09		0.869318	1.36522e-09		0.869318	1.01349e-09		0.869318	1.42204e-09		0.869318	1.71753e-09		0.869318	1.83307e-09
0.872212	1.34995e-09		0.872212	1.34264e-09		0.872212	1.00005e-09		0.872212	1.40219e-09		0.872212	1.69193e-09		0.872212	1.79775e-09
0.875106	1.34002e-09		0.875106	1.32543e-09		0.875106	9.90007e-10		0.875106	1.38734e-09		0.875106	1.67286e-09		0.875106	1.77164e-09
0.878	1.33619e-09		0.878	1.31858e-09		0.878	9.85947e-10		0.878	1.38145e-09		0.878	1.66533e-09		0.878	1.76132e-09

## Sheet: no2 distribution
SN 0			SN 0.2			SN 0.4			SN 0.6			SN 0.8			SN 1
Axial distance	no2 mass fraction		Axial distance	no2 mass fraction		Axial distance	no2 mass fraction		Axial distance	no2 mass fraction		Axial distance	no2 mass fraction		Axial distance	no2 mass fraction
0.00115113	3.83783e-09		0.00115113	3.74605e-09		0.00115113	1.20041e-09		0.00115113	1.29371e-09		0.00115113	5.68867e-10		0.00115113	3.46315e-10
0.00404502	5.59304e-09		0.00404502	5.33463e-09		0.00404502	1.67842e-09		0.00404502	1.54558e-09		0.00404502	6.31121e-10		0.00404502	3.74749e-10
0.00693891	7.63172e-09		0.00693891	7.10198e-09		0.00693891	2.29147e-09		0.00693891	1.77148e-09		0.00693891	6.8128e-10		0.00693891	3.92347e-10
0.0098328	9.83138e-09		0.0098328	8.91297e-09		0.0098328	3.04277e-09		0.0098328	1.95106e-09		0.0098328	7.12724e-10		0.0098328	3.97126e-10
0.0127267	1.20351e-08		0.0127267	1.06256e-08		0.0127267	3.89268e-09		0.0127267	2.06137e-09		0.0127267	7.21394e-10		0.0127267	3.86654e-10
0.0156206	1.40816e-08		0.0156206	1.21129e-08		0.0156206	4.75936e-09		0.0156206	2.09046e-09		0.0156206	7.05943e-10		0.0156206	3.64857e-10
0.0185145	1.58367e-08		0.0185145	1.32874e-08		0.0185145	5.55e-09		0.0185145	2.03244e-09		0.0185145	6.72452e-10		0.0185145	3.4142e-10
0.0214084	1.72243e-08		0.0214084	1.41286e-08		0.0214084	6.19487e-09		0.0214084	1.91058e-09		0.0214084	6.31906e-10		0.0214084	3.328e-10
0.0243023	1.82272e-08		0.0243023	1.46725e-08		0.0243023	6.6556e-09		0.0243023	1.75872e-09		0.0243023	6.08626e-10		0.0243023	3.51562e-10
0.0271961	1.88723e-08		0.0271961	1.49867e-08		0.0271961	6.9192e-09		0.0271961	1.60267e-09		0.0271961	6.29626e-10		0.0271961	4.10845e-10
0.03009	1.92188e-08		0.03009	1.5155e-08		0.03009	6.99671e-09		0.03009	1.48878e-09		0.03009	7.46928e-10		0.03009	5.35293e-10
0.0329839	1.93409e-08		0.0329839	1.52607e-08		0.0329839	6.91828e-09		0.0329839	1.52438e-09		0.0329839	1.1092e-09		0.0329839	7.59601e-10
0.0358778	1.93171e-08		0.0358778	1.53733e-08		0.0358778	6.71865e-09		0.0358778	2.03426e-09		0.0358778	2.11415e-09		0.0358778	1.14666e-09
0.0387717	1.92195e-08		0.0387717	1.55452e-08		0.0387717	6.42845e-09		0.0387717	4.0386e-09		0.0387717	4.70647e-09		0.0387717	1.85656e-09
0.0416656	1.91079e-08		0.0416656	1.58126e-08		0.0416656	6.07719e-09		0.0416656	1.03292e-08		0.0416656	1.17221e-08		0.0416656	3.33093e-09
0.0445595	1.90303e-08		0.0445595	1.61956e-08		0.0445595	5.68695e-09		0.0445595	2.82344e-08		0.0445595	2.80037e-08		0.0445595	6.87025e-09
0.0474534	1.90223e-08		0.0474534	1.66995e-08		0.0474534	5.27606e-09		0.0474534	7.0008e-08		0.0474534	6.38043e-08		0.0474534	1.52307e-08
0.0503473	1.91072e-08		0.0503473	1.73224e-08		0.0503473	4.8751e-09		0.0503473	1.53566e-07		0.0503473	1.4282e-07		0.0503473	3.49328e-08
0.0532412	1.92981e-08		0.0532412	1.8046e-08		0.0532412	4.54841e-09		0.0532412	3.24104e-07		0.0532412	3.06481e-07		0.0532412	7.93098e-08
0.056135	1.96012e-08		0.056135	1.88373e-08		0.056135	4.51529e-09		0.056135	6.43244e-07		0.056135	6.11479e-07		0.056135	1.69585e-07
0.0590289	2.00158e-08		0.0590289	1.96623e-08		0.0590289	5.48651e-09		0.0590289	1.12881e-06		0.0590289	1.08986e-06		0.0590289	3.43226e-07
0.0619228	2.05359e-08		0.0619228	2.04918e-08		0.0619228	9.70867e-09		0.0619228	1.71272e-06		0.0619228	1.68434e-06		0.0619228	6.49727e-07
0.0648167	2.11509e-08		0.0648167	2.12964e-08		0.0648167	2.28565e-08		0.0648167	2.27997e-06		0.0648167	2.26952e-06		0.0648167	1.11167e-06
0.0677106	2.18461e-08		0.0677106	2.20465e-08		0.0677106	5.38735e-08		0.0677106	2.69661e-06		0.0677106	2.68299e-06		0.0677106	1.68062e-06
0.0706045	2.26059e-08		0.0706045	2.27227e-08		0.0706045	1.18587e-07		0.0706045	2.9077e-06		0.0706045	2.87192e-06		0.0706045	2.25374e-06
0.0734984	2.34131e-08		0.0734984	2.33132e-08		0.0734984	2.39378e-07		0.0734984	2.96029e-06		0.0734984	2.93017e-06		0.0734984	2.68649e-06
0.0763923	2.42493e-08		0.0763923	2.38141e-08		0.0763923	4.2708e-07		0.0763923	2.95142e-06		0.0763923	2.93508e-06		0.0763923	2.91481e-06
0.0792862	2.50966e-08		0.0792862	2.42261e-08		0.0792862	6.8752e-07		0.0792862	2.94329e-06		0.0792862	2.9194e-06		0.0792862	3.00959e-06
0.0821801	2.59376e-08		0.0821801	2.45535e-08		0.0821801	1.01867e-06		0.0821801	2.88642e-06		0.0821801	2.89475e-06		0.0821801	3.04167e-06
0.085074	2.67564e-08		0.085074	2.48049e-08		0.085074	1.4018e-06		0.085074	2.82655e-06		0.085074	2.86596e-06		0.085074	3.04571e-06
0.085074	2.67564e-08		0.085074	2.48049e-08		0.085074	1.4018e-06		0.085074	2.82655e-06		0.085074	2.86596e-06		0.085074	3.04571e-06
0.0879678	2.75389e-08		0.0879678	2.49927e-08		0.0879678	1.8169e-06		0.0879678	2.76941e-06		0.0879678	2.83489e-06		0.0879678	3.03646e-06
0.0908617	2.82731e-08		0.0908617	2.51319e-08		0.0908617	2.24474e-06		0.0908617	2.71541e-06		0.0908617	2.80457e-06		0.0908617	3.02083e-06
0.0937556	2.895e-08		0.0937556	2.52385e-08		0.0937556	2.63859e-06		0.0937556	2.66508e-06		0.0937556	2.77693e-06		0.0937556	3.00281e-06
0.0966495	2.95628e-08		0.0966495	2.53281e-08		0.0966495	2.93556e-06		0.0966495	2.61944e-06		0.0966495	2.75219e-06		0.0966495	2.98482e-06
0.0995434	3.01072e-08		0.0995434	2.54148e-08		0.0995434	3.11675e-06		0.0995434	2.57858e-06		0.0995434	2.73035e-06		0.0995434	2.96834e-06
0.102437	3.05818e-08		0.102437	2.55105e-08		0.102437	3.20481e-06		0.102437	2.54252e-06		0.102437	2.71155e-06		0.102437	2.95386e-06
0.105331	3.0987e-08		0.105331	2.56247e-08		0.105331	3.22768e-06		0.105331	2.51112e-06		0.105331	2.69547e-06		0.105331	2.94139e-06
0.108225	3.13246e-08		0.108225	2.57642e-08		0.108225	3.20787e-06		0.108225	2.48397e-06		0.108225	2.6819e-06		0.108225	2.9306e-06
0.111119	3.15985e-08		0.111119	2.59339e-08		0.111119	3.16273e-06		0.111119	2.46069e-06		0.111119	2.67066e-06		0.111119	2.92122e-06
0.114013	3.18145e-08		0.114013	2.61499e-08		0.114013	3.10322e-06		0.114013	2.44096e-06		0.114013	2.66138e-06		0.114013	2.91322e-06
0.116907	3.19794e-08		0.116907	2.64093e-08		0.116907	3.03691e-06		0.116907	2.42436e-06		0.116907	2.65371e-06		0.116907	2.90649e-06
0.119801	3.21007e-08		0.119801	2.66926e-08		0.119801	2.96895e-06		0.119801	2.41049e-06		0.119801	2.64733e-06		0.119801	2.90071e-06
0.122695	3.2186e-08		0.122695	2.69972e-08		0.122695	2.90268e-06		0.122695	2.39894e-06		0.122695	2.64197e-06		0.122695	2.89565e-06
0.125588	3.22437e-08		0.125588	2.73228e-08		0.125588	2.83941e-06		0.125588	2.38934e-06		0.125588	2.63742e-06		0.125588	2.89114e-06
0.128482	3.22817e-08		0.128482	2.76676e-08		0.128482	2.77989e-06		0.128482	2.38136e-06		0.128482	2.6335e-06		0.128482	2.88705e-06
0.131376	3.23078e-08		0.131376	2.80287e-08		0.131376	2.72472e-06		0.131376	2.37472e-06		0.131376	2.63005e-06		0.131376	2.88326e-06
0.13427	3.23291e-08		0.13427	2.84028e-08		0.13427	2.67313e-06		0.13427	2.36921e-06		0.13427	2.62695e-06		0.13427	2.87967e-06
0.137164	3.2352e-08		0.137164	2.87862e-08		0.137164	2.62456e-06		0.137164	2.36463e-06		0.137164	2.6241e-06		0.137164	2.87622e-06
0.140058	3.23943e-08		0.140058	2.91756e-08		0.140058	2.57885e-06		0.140058	2.3608e-06		0.140058	2.62143e-06		0.140058	2.87285e-06
0.142952	3.24711e-08		0.142952	2.95682e-08		0.142952	2.53586e-06		0.142952	2.35758e-06		0.142952	2.61893e-06		0.142952	2.86953e-06
0.145846	3.25697e-08		0.145846	2.99619e-08		0.145846	2.49542e-06		0.145846	2.35482e-06		0.145846	2.61657e-06		0.145846	2.86623e-06
0.14874	3.2678e-08		0.14874	3.03557e-08		0.14874	2.45745e-06		0.14874	2.35242e-06		0.14874	2.61432e-06		0.14874	2.86293e-06
0.151633	3.28003e-08		0.151633	3.0749e-08		0.151633	2.42184e-06		0.151633	2.35029e-06		0.151633	2.61215e-06		0.151633	2.8596e-06
0.154527	3.29427e-08		0.154527	3.11424e-08		0.154527	2.38851e-06		0.154527	2.34837e-06		0.154527	2.61004e-06		0.154527	2.85623e-06
0.157421	3.311e-08		0.157421	3.15372e-08		0.157421	2.35737e-06		0.157421	2.34659e-06		0.157421	2.60797e-06		0.157421	2.85282e-06
0.160315	3.33058e-08		0.160315	3.19354e-08		0.160315	2.32831e-06		0.160315	2.34493e-06		0.160315	2.60594e-06		0.160315	2.84935e-06
0.163209	3.35324e-08		0.163209	3.23396e-08		0.163209	2.30098e-06		0.163209	2.34334e-06		0.163209	2.60393e-06		0.163209	2.84583e-06
0.166103	3.38003e-08		0.166103	3.2764e-08		0.166103	2.27487e-06		0.166103	2.34179e-06		0.166103	2.60194e-06		0.166103	2.84225e-06
0.166103	3.38003e-08		0.166103	3.2764e-08		0.166103	2.27487e-06		0.166103	2.34179e-06		0.166103	2.60194e-06		0.166103	2.84225e-06
0.168997	3.41187e-08		0.168997	3.32111e-08		0.168997	2.2499e-06		0.168997	2.34023e-06		0.168997	2.59985e-06		0.168997	2.83864e-06
0.171891	3.44888e-08		0.171891	3.36819e-08		0.171891	2.22622e-06		0.171891	2.33858e-06		0.171891	2.59761e-06		0.171891	2.83505e-06
0.174785	3.49008e-08		0.174785	3.41794e-08		0.174785	2.2038e-06		0.174785	2.33686e-06		0.174785	2.59524e-06		0.174785	2.83145e-06
0.177678	3.53467e-08		0.177678	3.46978e-08		0.177678	2.18262e-06		0.177678	2.33509e-06		0.177678	2.59276e-06		0.177678	2.82783e-06
0.180572	3.58294e-08		0.180572	3.52437e-08		0.180572	2.1627e-06		0.180572	2.33326e-06		0.180572	2.59018e-06		0.180572	2.82418e-06
0.183466	3.63472e-08		0.183466	3.58265e-08		0.183466	2.14401e-06		0.183466	2.33138e-06		0.183466	2.58752e-06		0.183466	2.8205e-06
0.18636	3.68984e-08		0.18636	3.64553e-08		0.18636	2.1265e-06		0.18636	2.32945e-06		0.18636	2.58477e-06		0.18636	2.81677e-06
0.189254	3.74871e-08		0.189254	3.71384e-08		0.189254	2.11012e-06		0.189254	2.32749e-06		0.189254	2.58195e-06		0.189254	2.81298e-06
0.192148	3.81047e-08		0.192148	3.78909e-08		0.192148	2.09479e-06		0.192148	2.32548e-06		0.192148	2.57906e-06		0.192148	2.80917e-06
0.195042	3.87388e-08		0.195042	3.87183e-08		0.195042	2.0805e-06		0.195042	2.32345e-06		0.195042	2.57609e-06		0.195042	2.80537e-06
0.197936	3.93918e-08		0.197936	3.96249e-08		0.197936	2.06722e-06		0.197936	2.32138e-06		0.197936	2.57306e-06		0.197936	2.80157e-06
0.20083	4.00674e-08		0.20083	4.06236e-08		0.20083	2.05486e-06		0.20083	2.31928e-06		0.20083	2.56995e-06		0.20083	2.79777e-06
0.203723	4.07701e-08		0.203723	4.17078e-08		0.203723	2.04334e-06		0.203723	2.31716e-06		0.203723	2.56678e-06		0.203723	2.79397e-06
0.206617	4.15044e-08		0.206617	4.28717e-08		0.206617	2.03244e-06		0.206617	2.31501e-06		0.206617	2.56354e-06		0.206617	2.79016e-06
0.209511	4.22741e-08		0.209511	4.41243e-08		0.209511	2.02199e-06		0.209511	2.31284e-06		0.209511	2.56023e-06		0.209511	2.78634e-06
0.212405	4.30823e-08		0.212405	4.54779e-08		0.212405	2.012e-06		0.212405	2.31064e-06		0.212405	2.55685e-06		0.212405	2.78252e-06
0.215299	4.39315e-08		0.215299	4.6945e-08		0.215299	2.00243e-06		0.215299	2.30843e-06		0.215299	2.55337e-06		0.215299	2.77868e-06
0.215299	4.39315e-08		0.215299	4.6945e-08		0.215299	2.00243e-06		0.215299	2.30843e-06		0.215299	2.55337e-06		0.215299	2.77868e-06
0.218193	4.48314e-08		0.218193	4.85377e-08		0.218193	1.99324e-06		0.218193	2.30619e-06		0.218193	2.54984e-06		0.218193	2.77483e-06
0.221087	4.57921e-08		0.221087	5.02684e-08		0.221087	1.98444e-06		0.221087	2.30389e-06		0.221087	2.54626e-06		0.221087	2.77092e-06
0.223981	4.68144e-08		0.223981	5.2149e-08		0.223981	1.97599e-06		0.223981	2.30151e-06		0.223981	2.54265e-06		0.223981	2.76696e-06
0.226875	4.78979e-08		0.226875	5.41996e-08		0.226875	1.96791e-06		0.226875	2.29906e-06		0.226875	2.53901e-06		0.226875	2.76292e-06
0.229768	4.90431e-08		0.229768	5.64401e-08		0.229768	1.96018e-06		0.229768	2.29653e-06		0.229768	2.53539e-06		0.229768	2.75882e-06
0.232662	5.02527e-08		0.232662	5.88677e-08		0.232662	1.95281e-06		0.232662	2.29397e-06		0.232662	2.53182e-06		0.232662	2.75465e-06
0.235556	5.15363e-08		0.235556	6.14873e-08		0.235556	1.94579e-06		0.235556	2.29138e-06		0.235556	2.52827e-06		0.235556	2.75042e-06
0.23845	5.28856e-08		0.23845	6.43083e-08		0.23845	1.93912e-06		0.23845	2.28878e-06		0.23845	2.52476e-06		0.23845	2.74613e-06
0.241344	5.43047e-08		0.241344	6.73449e-08		0.241344	1.93279e-06		0.241344	2.28616e-06		0.241344	2.52125e-06		0.241344	2.74177e-06
0.244238	5.58138e-08		0.244238	7.06224e-08		0.244238	1.92676e-06		0.244238	2.28353e-06		0.244238	2.51776e-06		0.244238	2.73735e-06
0.247132	5.74156e-08		0.247132	7.41448e-08		0.247132	1.92096e-06		0.247132	2.28088e-06		0.247132	2.51427e-06		0.247132	2.73286e-06
0.250026	5.91167e-08		0.250026	7.79143e-08		0.250026	1.91538e-06		0.250026	2.27821e-06		0.250026	2.51079e-06		0.250026	2.72833e-06
0.25292	6.09252e-08		0.25292	8.1951e-08		0.25292	1.91001e-06		0.25292	2.27552e-06		0.25292	2.5073e-06		0.25292	2.72377e-06
0.255814	6.28488e-08		0.255814	8.6289e-08		0.255814	1.90483e-06		0.255814	2.27283e-06		0.255814	2.50381e-06		0.255814	2.71919e-06
0.258707	6.48954e-08		0.258707	9.09531e-08		0.258707	1.89985e-06		0.258707	2.27012e-06		0.258707	2.50033e-06		0.258707	2.71458e-06
0.261601	6.70689e-08		0.261601	9.59628e-08		0.261601	1.89507e-06		0.261601	2.26739e-06		0.261601	2.49683e-06		0.261601	2.70995e-06
0.264495	6.93833e-08		0.264495	1.01355e-07		0.264495	1.89048e-06		0.264495	2.26465e-06		0.264495	2.49334e-06		0.264495	2.70529e-06
0.267389	7.18635e-08		0.267389	1.07166e-07		0.267389	1.88608e-06		0.267389	2.2619e-06		0.267389	2.48983e-06		0.267389	2.7006e-06
0.270283	7.45279e-08		0.270283	1.13439e-07		0.270283	1.88186e-06		0.270283	2.25914e-06		0.270283	2.48633e-06		0.270283	2.69589e-06
0.273177	7.73938e-08		0.273177	1.20205e-07		0.273177	1.87783e-06		0.273177	2.25637e-06		0.273177	2.48282e-06		0.273177	2.69115e-06
0.276071	8.04787e-08		0.276071	1.27474e-07		0.276071	1.87397e-06		0.276071	2.25359e-06		0.276071	2.47931e-06		0.276071	2.68638e-06
0.278965	8.37938e-08		0.278965	1.35253e-07		0.278965	1.87027e-06		0.278965	2.2508e-06		0.278965	2.4758e-06		0.278965	2.68157e-06
0.281859	8.73531e-08		0.281859	1.43562e-07		0.281859	1.86675e-06		0.281859	2.248e-06		0.281859	2.4723e-06		0.281859	2.67674e-06
0.284752	9.11833e-08		0.284752	1.52442e-07		0.284752	1.86338e-06		0.284752	2.24518e-06		0.284752	2.46882e-06		0.284752	2.67187e-06
0.287646	9.53172e-08		0.287646	1.61918e-07		0.287646	1.86016e-06		0.287646	2.24236e-06		0.287646	2.46536e-06		0.287646	2.66696e-06
0.29054	9.97902e-08		0.29054	1.7199e-07		0.29054	1.85709e-06		0.29054	2.23953e-06		0.29054	2.46192e-06		0.29054	2.66202e-06
0.293434	1.04637e-07		0.293434	1.82682e-07		0.293434	1.85417e-06		0.293434	2.23668e-06		0.293434	2.45845e-06		0.293434	2.65704e-06
0.296328	1.09892e-07		0.296328	1.94026e-07		0.296328	1.85139e-06		0.296328	2.23383e-06		0.296328	2.45487e-06		0.296328	2.65201e-06
0.299222	1.15596e-07		0.299222	2.06013e-07		0.299222	1.84873e-06		0.299222	2.23096e-06		0.299222	2.4512e-06		0.299222	2.64695e-06
0.302116	1.21791e-07		0.302116	2.18644e-07		0.302116	1.84617e-06		0.302116	2.22808e-06		0.302116	2.44743e-06		0.302116	2.64189e-06
0.30501	1.28516e-07		0.30501	2.3196e-07		0.30501	1.84368e-06		0.30501	2.22517e-06		0.30501	2.44357e-06		0.30501	2.63683e-06
0.307904	1.35813e-07		0.307904	2.46024e-07		0.307904	1.84126e-06		0.307904	2.22225e-06		0.307904	2.43962e-06		0.307904	2.63175e-06
0.310797	1.43736e-07		0.310797	2.60903e-07		0.310797	1.83888e-06		0.310797	2.2193e-06		0.310797	2.43557e-06		0.310797	2.62667e-06
0.313691	1.52337e-07		0.313691	2.76668e-07		0.313691	1.83654e-06		0.313691	2.21636e-06		0.313691	2.43143e-06		0.313691	2.62158e-06
0.313691	1.52337e-07		0.313691	2.76668e-07		0.313691	1.83654e-06		0.313691	2.21636e-06		0.313691	2.43143e-06		0.313691	2.62158e-06
0.316585	1.61662e-07		0.316585	2.93395e-07		0.316585	1.83424e-06		0.316585	2.2134e-06		0.316585	2.42723e-06		0.316585	2.61644e-06
0.319479	1.71758e-07		0.319479	3.11158e-07		0.319479	1.83202e-06		0.319479	2.2104e-06		0.319479	2.42303e-06		0.319479	2.61124e-06
0.322373	1.8269e-07		0.322373	3.30035e-07		0.322373	1.82989e-06		0.322373	2.20736e-06		0.322373	2.4188e-06		0.322373	2.60598e-06
0.325267	1.94512e-07		0.325267	3.50107e-07		0.325267	1.82783e-06		0.325267	2.20428e-06		0.325267	2.41455e-06		0.325267	2.60066e-06
0.328161	2.07281e-07		0.328161	3.71458e-07		0.328161	1.82584e-06		0.328161	2.20118e-06		0.328161	2.41026e-06		0.328161	2.59529e-06
0.331055	2.2108e-07		0.331055	3.94168e-07		0.331055	1.82391e-06		0.331055	2.19805e-06		0.331055	2.40594e-06		0.331055	2.58986e-06
0.333949	2.35982e-07		0.333949	4.18367e-07		0.333949	1.82204e-06		0.333949	2.19491e-06		0.333949	2.40158e-06		0.333949	2.58439e-06
0.336842	2.52047e-07		0.336842	4.4419e-07		0.336842	1.82021e-06		0.336842	2.19175e-06		0.336842	2.39718e-06		0.336842	2.57887e-06
0.339736	2.69343e-07		0.339736	4.71679e-07		0.339736	1.81844e-06		0.339736	2.18858e-06		0.339736	2.39273e-06		0.339736	2.5733e-06
0.34263	2.87968e-07		0.34263	5.00901e-07		0.34263	1.81671e-06		0.34263	2.18539e-06		0.34263	2.38824e-06		0.34263	2.5677e-06
0.345524	3.08034e-07		0.345524	5.3202e-07		0.345524	1.81503e-06		0.345524	2.1822e-06		0.345524	2.38369e-06		0.345524	2.56209e-06
0.348418	3.29662e-07		0.348418	5.65222e-07		0.348418	1.81339e-06		0.348418	2.17899e-06		0.348418	2.37914e-06		0.348418	2.55647e-06
0.351312	3.52981e-07		0.351312	6.00694e-07		0.351312	1.81178e-06		0.351312	2.17578e-06		0.351312	2.3746e-06		0.351312	2.55085e-06
0.354206	3.78117e-07		0.354206	6.38646e-07		0.354206	1.81022e-06		0.354206	2.17255e-06		0.354206	2.37009e-06		0.354206	2.54521e-06
0.3571	4.05223e-07		0.3571	6.79328e-07		0.3571	1.80869e-06		0.3571	2.16931e-06		0.3571	2.3656e-06		0.3571	2.53956e-06
0.359994	4.34427e-07		0.359994	7.23062e-07		0.359994	1.80719e-06		0.359994	2.16607e-06		0.359994	2.36115e-06		0.359994	2.5339e-06
0.362887	4.65824e-07		0.362887	7.70342e-07		0.362887	1.80573e-06		0.362887	2.16281e-06		0.362887	2.35672e-06		0.362887	2.52823e-06
0.365781	4.99531e-07		0.365781	8.21582e-07		0.365781	1.8043e-06		0.365781	2.15954e-06		0.365781	2.35232e-06		0.365781	2.52254e-06
0.368675	5.35679e-07		0.368675	8.77257e-07		0.368675	1.80289e-06		0.368675	2.15626e-06		0.368675	2.34795e-06		0.368675	2.51685e-06
0.371569	5.74456e-07		0.371569	9.38232e-07		0.371569	1.80151e-06		0.371569	2.15297e-06		0.371569	2.34362e-06		0.371569	2.51113e-06
0.374463	6.16026e-07		0.374463	1.00543e-06		0.374463	1.80016e-06		0.374463	2.14966e-06		0.374463	2.33932e-06		0.374463	2.5054e-06
0.377357	6.6051e-07		0.377357	1.08044e-06		0.377357	1.79882e-06		0.377357	2.14633e-06		0.377357	2.33507e-06		0.377357	2.49964e-06
0.380251	7.08096e-07		0.380251	1.166e-06		0.380251	1.79751e-06		0.380251	2.14298e-06		0.380251	2.33085e-06		0.380251	2.49388e-06
0.383145	7.58996e-07		0.383145	1.26597e-06		0.383145	1.79622e-06		0.383145	2.13963e-06		0.383145	2.32667e-06		0.383145	2.48813e-06
0.386039	8.13427e-07		0.386039	1.38327e-06		0.386039	1.79495e-06		0.386039	2.1363e-06		0.386039	2.32253e-06		0.386039	2.4824e-06
0.388932	8.717e-07		0.388932	1.51991e-06		0.388932	1.7937e-06		0.388932	2.13299e-06		0.388932	2.31844e-06		0.388932	2.47669e-06
0.391826	9.34159e-07		0.391826	1.67213e-06		0.391826	1.79248e-06		0.391826	2.1297e-06		0.391826	2.31439e-06		0.391826	2.47099e-06
0.39472	1.00107e-06		0.39472	1.83619e-06		0.39472	1.7913e-06		0.39472	2.12642e-06		0.39472	2.31039e-06		0.39472	2.4653e-06
0.397614	1.07298e-06		0.397614	2.01275e-06		0.397614	1.79015e-06		0.397614	2.12315e-06		0.397614	2.3064e-06		0.397614	2.45961e-06
0.400508	1.15056e-06		0.400508	2.19535e-06		0.400508	1.78906e-06		0.400508	2.11988e-06		0.400508	2.30235e-06		0.400508	2.45393e-06
0.403402	1.23474e-06		0.403402	2.3819e-06		0.403402	1.78804e-06		0.403402	2.11662e-06		0.403402	2.29823e-06		0.403402	2.44824e-06
0.403402	1.23474e-06		0.403402	2.3819e-06		0.403402	1.78804e-06		0.403402	2.11662e-06		0.403402	2.29823e-06		0.403402	2.44824e-06
0.406296	1.32707e-06		0.406296	2.57131e-06		0.406296	1.78702e-06		0.406296	2.11334e-06		0.406296	2.29405e-06		0.406296	2.44255e-06
0.40919	1.43006e-06		0.40919	2.75762e-06		0.40919	1.7859e-06		0.40919	2.11005e-06		0.40919	2.28982e-06		0.40919	2.43685e-06
0.412084	1.54755e-06		0.412084	2.93887e-06		0.412084	1.7847e-06		0.412084	2.10673e-06		0.412084	2.28552e-06		0.412084	2.43114e-06
0.414977	1.68325e-06		0.414977	3.11301e-06		0.414977	1.78345e-06		0.414977	2.10339e-06		0.414977	2.28117e-06		0.414977	2.42541e-06
0.417871	1.83681e-06		0.417871	3.27959e-06		0.417871	1.78214e-06		0.417871	2.10002e-06		0.417871	2.27675e-06		0.417871	2.41967e-06
0.420765	2.00444e-06		0.420765	3.43798e-06		0.420765	1.78078e-06		0.420765	2.09661e-06		0.420765	2.27227e-06		0.420765	2.41391e-06
0.423659	2.18177e-06		0.423659	3.58652e-06		0.423659	1.77938e-06		0.423659	2.09318e-06		0.423659	2.26772e-06		0.423659	2.40811e-06
0.426553	2.36476e-06		0.426553	3.72481e-06		0.426553	1.77794e-06		0.426553	2.08972e-06		0.426553	2.26311e-06		0.426553	2.40228e-06
0.429447	2.55104e-06		0.429447	3.8521e-06		0.429447	1.77647e-06		0.429447	2.08624e-06		0.429447	2.25844e-06		0.429447	2.39643e-06
0.432341	2.73417e-06		0.432341	3.96835e-06		0.432341	1.77498e-06		0.432341	2.08274e-06		0.432341	2.25373e-06		0.432341	2.39056e-06
0.435235	2.9099e-06		0.435235	4.0737e-06		0.435235	1.77346e-06		0.435235	2.07922e-06		0.435235	2.24896e-06		0.435235	2.38467e-06
0.438129	3.07836e-06		0.438129	4.16766e-06		0.438129	1.77192e-06		0.438129	2.0757e-06		0.438129	2.24415e-06		0.438129	2.37877e-06
0.441023	3.23867e-06		0.441023	4.25098e-06		0.441023	1.77034e-06		0.441023	2.07216e-06		0.441023	2.2393e-06		0.441023	2.37286e-06
0.443916	3.3927e-06		0.443916	4.32356e-06		0.443916	1.76874e-06		0.443916	2.06863e-06		0.443916	2.23443e-06		0.443916	2.36696e-06
0.44681	3.53512e-06		0.44681	4.38511e-06		0.44681	1.76711e-06		0.44681	2.06509e-06		0.44681	2.22952e-06		0.44681	2.36106e-06
0.449704	3.66229e-06		0.449704	4.437e-06		0.449704	1.76546e-06		0.449704	2.06153e-06		0.449704	2.22458e-06		0.449704	2.35517e-06
0.452598	3.77828e-06		0.452598	4.47921e-06		0.452598	1.76378e-06		0.452598	2.05795e-06		0.452598	2.21962e-06		0.452598	2.34929e-06
0.455492	3.883e-06		0.455492	4.5113e-06		0.455492	1.76208e-06		0.455492	2.05436e-06		0.455492	2.21463e-06		0.455492	2.34343e-06
0.458386	3.97531e-06		0.458386	4.53497e-06		0.458386	1.76036e-06		0.458386	2.05075e-06		0.458386	2.20963e-06		0.458386	2.33757e-06
0.46128	4.05665e-06		0.46128	4.5514e-06		0.46128	1.75862e-06		0.46128	2.04713e-06		0.46128	2.20461e-06		0.46128	2.33171e-06
0.464174	4.12751e-06		0.464174	4.56021e-06		0.464174	1.75687e-06		0.464174	2.04351e-06		0.464174	2.19959e-06		0.464174	2.32585e-06
0.467068	4.18703e-06		0.467068	4.56087e-06		0.467068	1.75511e-06		0.467068	2.03987e-06		0.467068	2.19457e-06		0.467068	2.31999e-06
0.469961	4.23668e-06		0.469961	4.55495e-06		0.469961	1.75334e-06		0.469961	2.03623e-06		0.469961	2.18954e-06		0.469961	2.31413e-06
0.472855	4.27623e-06		0.472855	4.54402e-06		0.472855	1.75157e-06		0.472855	2.03259e-06		0.472855	2.18452e-06		0.472855	2.30828e-06
0.475749	4.30644e-06		0.475749	4.52818e-06		0.475749	1.74978e-06		0.475749	2.02894e-06		0.475749	2.17951e-06		0.475749	2.30244e-06
0.478643	4.32675e-06		0.478643	4.50748e-06		0.478643	1.748e-06		0.478643	2.02529e-06		0.478643	2.17451e-06		0.478643	2.2966e-06
0.481537	4.33568e-06		0.481537	4.48263e-06		0.481537	1.74621e-06		0.481537	2.02164e-06		0.481537	2.16952e-06		0.481537	2.29078e-06
0.484431	4.33572e-06		0.484431	4.45406e-06		0.484431	1.74442e-06		0.484431	2.01798e-06		0.484431	2.16454e-06		0.484431	2.28497e-06
0.487325	4.32985e-06		0.487325	4.42062e-06		0.487325	1.74263e-06		0.487325	2.01433e-06		0.487325	2.15957e-06		0.487325	2.27918e-06
0.490219	4.31936e-06		0.490219	4.38347e-06		0.490219	1.74085e-06		0.490219	2.01068e-06		0.490219	2.15462e-06		0.490219	2.27341e-06
0.493113	4.30388e-06		0.493113	4.34322e-06		0.493113	1.73907e-06		0.493113	2.00702e-06		0.493113	2.1497e-06		0.493113	2.26766e-06
0.496006	4.2825e-06		0.496006	4.29992e-06		0.496006	1.7373e-06		0.496006	2.00337e-06		0.496006	2.14481e-06		0.496006	2.26194e-06
0.4989	4.2557e-06		0.4989	4.25506e-06		0.4989	1.73553e-06		0.4989	1.99972e-06		0.4989	2.13997e-06		0.4989	2.25625e-06
0.501794	4.22527e-06		0.501794	4.20893e-06		0.501794	1.73378e-06		0.501794	1.99607e-06		0.501794	2.13516e-06		0.501794	2.25058e-06
0.504688	4.18978e-06		0.504688	4.16234e-06		0.504688	1.73203e-06		0.504688	1.99243e-06		0.504688	2.13041e-06		0.504688	2.24496e-06
0.507582	4.15008e-06		0.507582	4.11544e-06		0.507582	1.7303e-06		0.507582	1.98879e-06		0.507582	2.12569e-06		0.507582	2.23937e-06
0.510476	4.10943e-06		0.510476	4.06728e-06		0.510476	1.72859e-06		0.510476	1.98517e-06		0.510476	2.12102e-06		0.510476	2.23382e-06
0.51337	4.06765e-06		0.51337	4.01875e-06		0.51337	1.72689e-06		0.51337	1.98156e-06		0.51337	2.11641e-06		0.51337	2.22831e-06
0.516264	4.02386e-06		0.516264	3.97098e-06		0.516264	1.72521e-06		0.516264	1.97798e-06		0.516264	2.11184e-06		0.516264	2.22284e-06
0.519158	3.97783e-06		0.519158	3.92353e-06		0.519158	1.72354e-06		0.519158	1.97441e-06		0.519158	2.10734e-06		0.519158	2.21743e-06
0.522051	3.93061e-06		0.522051	3.87469e-06		0.522051	1.72189e-06		0.522051	1.97087e-06		0.522051	2.10289e-06		0.522051	2.21206e-06
0.524945	3.88247e-06		0.524945	3.82426e-06		0.524945	1.72026e-06		0.524945	1.96735e-06		0.524945	2.09852e-06		0.524945	2.20676e-06
0.524945	3.88247e-06		0.524945	3.82426e-06		0.524945	1.72026e-06		0.524945	1.96735e-06		0.524945	2.09852e-06		0.524945	2.20676e-06
0.527839	3.83294e-06		0.527839	3.77368e-06		0.527839	1.71863e-06		0.527839	1.96385e-06		0.527839	2.09418e-06		0.527839	2.20152e-06
0.530733	3.78254e-06		0.530733	3.72338e-06		0.530733	1.717e-06		0.530733	1.96036e-06		0.530733	2.08986e-06		0.530733	2.19635e-06
0.533627	3.73145e-06		0.533627	3.67333e-06		0.533627	1.71537e-06		0.533627	1.95687e-06		0.533627	2.08554e-06		0.533627	2.19125e-06
0.536521	3.68005e-06		0.536521	3.62375e-06		0.536521	1.71374e-06		0.536521	1.95338e-06		0.536521	2.08123e-06		0.536521	2.18619e-06
0.539415	3.62879e-06		0.539415	3.57481e-06		0.539415	1.71209e-06		0.539415	1.9499e-06		0.539415	2.07692e-06		0.539415	2.18115e-06
0.542309	3.57749e-06		0.542309	3.52644e-06		0.542309	1.71044e-06		0.542309	1.94642e-06		0.542309	2.07262e-06		0.542309	2.17612e-06
0.545203	3.52594e-06		0.545203	3.47874e-06		0.545203	1.70877e-06		0.545203	1.94293e-06		0.545203	2.06833e-06		0.545203	2.17109e-06
0.548096	3.47444e-06		0.548096	3.43188e-06		0.548096	1.70708e-06		0.548096	1.93945e-06		0.548096	2.06405e-06		0.548096	2.16608e-06
0.55099	3.42318e-06		0.55099	3.38591e-06		0.55099	1.70537e-06		0.55099	1.93596e-06		0.55099	2.05978e-06		0.55099	2.16107e-06
0.553884	3.3725e-06		0.553884	3.34088e-06		0.553884	1.70363e-06		0.553884	1.93247e-06		0.553884	2.05551e-06		0.553884	2.15607e-06
0.556778	3.3227e-06		0.556778	3.29691e-06		0.556778	1.70187e-06		0.556778	1.92897e-06		0.556778	2.05125e-06		0.556778	2.15107e-06
0.559672	3.2738e-06		0.559672	3.25404e-06		0.559672	1.70008e-06		0.559672	1.92547e-06		0.559672	2.04698e-06		0.559672	2.14609e-06
0.562566	3.22579e-06		0.562566	3.21224e-06		0.562566	1.69828e-06		0.562566	1.92197e-06		0.562566	2.04272e-06		0.562566	2.14112e-06
0.56546	3.17883e-06		0.56546	3.17142e-06		0.56546	1.69646e-06		0.56546	1.91845e-06		0.56546	2.03846e-06		0.56546	2.13616e-06
0.568354	3.13331e-06		0.568354	3.13156e-06		0.568354	1.69463e-06		0.568354	1.91493e-06		0.568354	2.0342e-06		0.568354	2.13121e-06
0.571248	3.08943e-06		0.571248	3.09281e-06		0.571248	1.69279e-06		0.571248	1.9114e-06		0.571248	2.02994e-06		0.571248	2.12627e-06
0.574142	3.04699e-06		0.574142	3.05521e-06		0.574142	1.69094e-06		0.574142	1.90787e-06		0.574142	2.02568e-06		0.574142	2.12134e-06
0.577035	3.00549e-06		0.577035	3.01868e-06		0.577035	1.68907e-06		0.577035	1.90433e-06		0.577035	2.02142e-06		0.577035	2.11643e-06
0.579929	2.96476e-06		0.579929	2.98319e-06		0.579929	1.68717e-06		0.579929	1.90079e-06		0.579929	2.01716e-06		0.579929	2.11152e-06
0.582823	2.92477e-06		0.582823	2.94868e-06		0.582823	1.68524e-06		0.582823	1.89724e-06		0.582823	2.01289e-06		0.582823	2.10662e-06
0.585717	2.88577e-06		0.585717	2.91512e-06		0.585717	1.68326e-06		0.585717	1.8937e-06		0.585717	2.00863e-06		0.585717	2.10173e-06
0.588611	2.84819e-06		0.588611	2.88245e-06		0.588611	1.6812e-06		0.588611	1.89018e-06		0.588611	2.00436e-06		0.588611	2.09685e-06
0.591505	2.81184e-06		0.591505	2.85064e-06		0.591505	1.67911e-06		0.591505	1.88667e-06		0.591505	2.00011e-06		0.591505	2.09197e-06
0.594399	2.77658e-06		0.594399	2.8197e-06		0.594399	1.67706e-06		0.594399	1.88317e-06		0.594399	1.99587e-06		0.594399	2.08711e-06
0.597293	2.74251e-06		0.597293	2.7898e-06		0.597293	1.67504e-06		0.597293	1.87969e-06		0.597293	1.99165e-06		0.597293	2.08225e-06
0.600186	2.70968e-06		0.600186	2.76098e-06		0.600186	1.67305e-06		0.600186	1.87621e-06		0.600186	1.98744e-06		0.600186	2.0774e-06
0.60308	2.67776e-06		0.60308	2.73315e-06		0.60308	1.67109e-06		0.60308	1.87275e-06		0.60308	1.98324e-06		0.60308	2.07255e-06
0.605974	2.64635e-06		0.605974	2.70623e-06		0.605974	1.66913e-06		0.605974	1.8693e-06		0.605974	1.97906e-06		0.605974	2.06772e-06
0.608868	2.61565e-06		0.608868	2.68013e-06		0.608868	1.66719e-06		0.608868	1.86586e-06		0.608868	1.9749e-06		0.608868	2.06289e-06
0.611762	2.58599e-06		0.611762	2.65479e-06		0.611762	1.66525e-06		0.611762	1.86243e-06		0.611762	1.97075e-06		0.611762	2.05807e-06
0.614656	2.55729e-06		0.614656	2.63015e-06		0.614656	1.66331e-06		0.614656	1.85902e-06		0.614656	1.96662e-06		0.614656	2.05325e-06
0.61755	2.52957e-06		0.61755	2.60614e-06		0.61755	1.66138e-06		0.61755	1.85562e-06		0.61755	1.96251e-06		0.61755	2.04844e-06
0.620444	2.50285e-06		0.620444	2.5828e-06		0.620444	1.65946e-06		0.620444	1.85223e-06		0.620444	1.95842e-06		0.620444	2.04364e-06
0.623338	2.47709e-06		0.623338	2.56014e-06		0.623338	1.65754e-06		0.623338	1.84886e-06		0.623338	1.95436e-06		0.623338	2.03885e-06
0.626231	2.45224e-06		0.626231	2.53805e-06		0.626231	1.65563e-06		0.626231	1.8455e-06		0.626231	1.95031e-06		0.626231	2.03407e-06
0.629125	2.42825e-06		0.629125	2.51647e-06		0.629125	1.65374e-06		0.629125	1.84216e-06		0.629125	1.94629e-06		0.629125	2.0293e-06
0.632019	2.40515e-06		0.632019	2.49549e-06		0.632019	1.65186e-06		0.632019	1.83884e-06		0.632019	1.9423e-06		0.632019	2.02454e-06
0.634913	2.38282e-06		0.634913	2.4752e-06		0.634913	1.65001e-06		0.634913	1.83555e-06		0.634913	1.93835e-06		0.634913	2.01979e-06
0.637807	2.36129e-06		0.637807	2.45558e-06		0.637807	1.64818e-06		0.637807	1.8323e-06		0.637807	1.93442e-06		0.637807	2.01505e-06
0.640701	2.34053e-06		0.640701	2.43659e-06		0.640701	1.64639e-06		0.640701	1.82907e-06		0.640701	1.93053e-06		0.640701	2.01031e-06
0.643595	2.32052e-06		0.643595	2.41811e-06		0.643595	1.64466e-06		0.643595	1.82589e-06		0.643595	1.92667e-06		0.643595	2.00558e-06
0.643595	2.32052e-06		0.643595	2.41811e-06		0.643595	1.64466e-06		0.643595	1.82589e-06		0.643595	1.92667e-06		0.643595	2.00558e-06
0.646489	2.30128e-06		0.646489	2.40015e-06		0.646489	1.64295e-06		0.646489	1.82274e-06		0.646489	1.92282e-06		0.646489	2.00086e-06
0.649383	2.28276e-06		0.649383	2.38273e-06		0.649383	1.64125e-06		0.649383	1.81961e-06		0.649383	1.91898e-06		0.649383	1.99616e-06
0.652277	2.26486e-06		0.652277	2.36579e-06		0.652277	1.63953e-06		0.652277	1.81648e-06		0.652277	1.91515e-06		0.652277	1.99147e-06
0.65517	2.24758e-06		0.65517	2.34926e-06		0.65517	1.63781e-06		0.65517	1.81337e-06		0.65517	1.91134e-06		0.65517	1.9868e-06
0.658064	2.2309e-06		0.658064	2.33318e-06		0.658064	1.63608e-06		0.658064	1.81027e-06		0.658064	1.90753e-06		0.658064	1.98215e-06
0.660958	2.21476e-06		0.660958	2.31756e-06		0.660958	1.63433e-06		0.660958	1.80717e-06		0.660958	1.90373e-06		0.660958	1.97752e-06
0.663852	2.19909e-06		0.663852	2.30236e-06		0.663852	1.63256e-06		0.663852	1.80407e-06		0.663852	1.89994e-06		0.663852	1.97291e-06
0.666746	2.18391e-06		0.666746	2.28751e-06		0.666746	1.63076e-06		0.666746	1.80098e-06		0.666746	1.89615e-06		0.666746	1.96831e-06
0.66964	2.16927e-06		0.66964	2.27304e-06		0.66964	1.62895e-06		0.66964	1.79789e-06		0.66964	1.89235e-06		0.66964	1.96373e-06
0.672534	2.15509e-06		0.672534	2.259e-06		0.672534	1.62713e-06		0.672534	1.7948e-06		0.672534	1.88856e-06		0.672534	1.95915e-06
0.675428	2.14132e-06		0.675428	2.24535e-06		0.675428	1.62531e-06		0.675428	1.79171e-06		0.675428	1.88477e-06		0.675428	1.95459e-06
0.678322	2.12797e-06		0.678322	2.23205e-06		0.678322	1.62349e-06		0.678322	1.78862e-06		0.678322	1.88097e-06		0.678322	1.95003e-06
0.681215	2.1151e-06		0.681215	2.21905e-06		0.681215	1.62166e-06		0.681215	1.78554e-06		0.681215	1.87717e-06		0.681215	1.94547e-06
0.684109	2.10265e-06		0.684109	2.20636e-06		0.684109	1.61983e-06		0.684109	1.78245e-06		0.684109	1.87336e-06		0.684109	1.94093e-06
0.687003	2.09058e-06		0.687003	2.19399e-06		0.687003	1.61799e-06		0.687003	1.77936e-06		0.687003	1.86955e-06		0.687003	1.93638e-06
0.689897	2.07881e-06		0.689897	2.18193e-06		0.689897	1.61615e-06		0.689897	1.77627e-06		0.689897	1.86572e-06		0.689897	1.93185e-06
0.692791	2.06738e-06		0.692791	2.17018e-06		0.692791	1.6143e-06		0.692791	1.77319e-06		0.692791	1.86188e-06		0.692791	1.92731e-06
0.695685	2.05636e-06		0.695685	2.1587e-06		0.695685	1.61245e-06		0.695685	1.7701e-06		0.695685	1.85804e-06		0.695685	1.92278e-06
0.698579	2.04572e-06		0.698579	2.14748e-06		0.698579	1.61059e-06		0.698579	1.767e-06		0.698579	1.85419e-06		0.698579	1.91825e-06
0.701473	2.03544e-06		0.701473	2.13653e-06		0.701473	1.60874e-06		0.701473	1.76391e-06		0.701473	1.85034e-06		0.701473	1.91372e-06
0.704367	2.02548e-06		0.704367	2.12591e-06		0.704367	1.60689e-06		0.704367	1.76081e-06		0.704367	1.84649e-06		0.704367	1.90918e-06
0.70726	2.01579e-06		0.70726	2.11559e-06		0.70726	1.60504e-06		0.70726	1.7577e-06		0.70726	1.84264e-06		0.70726	1.90465e-06
0.710154	2.00642e-06		0.710154	2.10557e-06		0.710154	1.60321e-06		0.710154	1.75459e-06		0.710154	1.83879e-06		0.710154	1.90012e-06
0.713048	1.99742e-06		0.713048	2.09584e-06		0.713048	1.60141e-06		0.713048	1.75146e-06		0.713048	1.83494e-06		0.713048	1.89559e-06
0.715942	1.98878e-06		0.715942	2.08641e-06		0.715942	1.59964e-06		0.715942	1.74832e-06		0.715942	1.83109e-06		0.715942	1.89107e-06
0.715942	1.98878e-06		0.715942	2.08641e-06		0.715942	1.59964e-06		0.715942	1.74832e-06		0.715942	1.83109e-06		0.715942	1.89107e-06
0.718836	1.98045e-06		0.718836	2.07724e-06		0.718836	1.59789e-06		0.718836	1.74516e-06		0.718836	1.82723e-06		0.718836	1.88654e-06
0.72173	1.97238e-06		0.72173	2.06827e-06		0.72173	1.59611e-06		0.72173	1.74199e-06		0.72173	1.82335e-06		0.72173	1.88197e-06
0.724624	1.96455e-06		0.724624	2.05953e-06		0.724624	1.59431e-06		0.724624	1.7388e-06		0.724624	1.81944e-06		0.724624	1.87738e-06
0.727518	1.95692e-06		0.727518	2.05099e-06		0.727518	1.59247e-06		0.727518	1.73559e-06		0.727518	1.8155e-06		0.727518	1.87275e-06
0.730412	1.94947e-06		0.730412	2.04262e-06		0.730412	1.59061e-06		0.730412	1.73237e-06		0.730412	1.81153e-06		0.730412	1.86808e-06
0.733305	1.94219e-06		0.733305	2.03438e-06		0.733305	1.58871e-06		0.733305	1.72911e-06		0.733305	1.80752e-06		0.733305	1.86335e-06
0.736199	1.93509e-06		0.736199	2.02625e-06		0.736199	1.58678e-06		0.736199	1.72583e-06		0.736199	1.80347e-06		0.736199	1.85857e-06
0.739093	1.92814e-06		0.739093	2.0182e-06		0.739093	1.5848e-06		0.739093	1.72251e-06		0.739093	1.79936e-06		0.739093	1.85373e-06
0.741987	1.92131e-06		0.741987	2.01024e-06		0.741987	1.58277e-06		0.741987	1.71915e-06		0.741987	1.7952e-06		0.741987	1.84882e-06
0.744881	1.91456e-06		0.744881	2.00238e-06		0.744881	1.58069e-06		0.744881	1.71575e-06		0.744881	1.79098e-06		0.744881	1.84382e-06
0.747775	1.90788e-06		0.747775	1.99461e-06		0.747775	1.57854e-06		0.747775	1.71228e-06		0.747775	1.78668e-06		0.747775	1.83872e-06
0.750669	1.90123e-06		0.750669	1.9869e-06		0.750669	1.57632e-06		0.750669	1.70876e-06		0.750669	1.7823e-06		0.750669	1.83353e-06
0.753563	1.89459e-06		0.753563	1.9792e-06		0.753563	1.57402e-06		0.753563	1.70517e-06		0.753563	1.7778e-06		0.753563	1.82821e-06
0.756457	1.88793e-06		0.756457	1.97151e-06		0.756457	1.57163e-06		0.756457	1.70149e-06		0.756457	1.77315e-06		0.756457	1.82276e-06
0.75935	1.88128e-06		0.75935	1.96377e-06		0.75935	1.56914e-06		0.75935	1.69772e-06		0.75935	1.76836e-06		0.75935	1.81717e-06
0.762244	1.87464e-06		0.762244	1.95596e-06		0.762244	1.56654e-06		0.762244	1.6938e-06		0.762244	1.7634e-06		0.762244	1.81139e-06
0.765138	1.86801e-06		0.765138	1.94804e-06		0.765138	1.56382e-06		0.765138	1.68973e-06		0.765138	1.75825e-06		0.765138	1.80539e-06
0.768032	1.86133e-06		0.768032	1.94001e-06		0.768032	1.56096e-06		0.768032	1.68549e-06		0.768032	1.7529e-06		0.768032	1.79916e-06
0.770926	1.85459e-06		0.770926	1.93189e-06		0.770926	1.55797e-06		0.770926	1.68107e-06		0.770926	1.74734e-06		0.770926	1.79267e-06
0.77382	1.84776e-06		0.77382	1.92366e-06		0.77382	1.55484e-06		0.77382	1.67646e-06		0.77382	1.74154e-06		0.77382	1.78592e-06
0.776714	1.84083e-06		0.776714	1.91528e-06		0.776714	1.55156e-06		0.776714	1.67165e-06		0.776714	1.73551e-06		0.776714	1.77887e-06
0.779608	1.83376e-06		0.779608	1.90672e-06		0.779608	1.54811e-06		0.779608	1.66662e-06		0.779608	1.72922e-06		0.779608	1.77153e-06
0.782502	1.82656e-06		0.782502	1.89798e-06		0.782502	1.5445e-06		0.782502	1.66137e-06		0.782502	1.72267e-06		0.782502	1.76389e-06
0.785396	1.81921e-06		0.785396	1.88902e-06		0.785396	1.54072e-06		0.785396	1.6559e-06		0.785396	1.71586e-06		0.785396	1.75593e-06
0.788289	1.81175e-06		0.788289	1.87986e-06		0.788289	1.53677e-06		0.788289	1.6502e-06		0.788289	1.7088e-06		0.788289	1.74766e-06
0.791183	1.80417e-06		0.791183	1.87054e-06		0.791183	1.53263e-06		0.791183	1.64429e-06		0.791183	1.70147e-06		0.791183	1.73908e-06
0.794077	1.79648e-06		0.794077	1.86111e-06		0.794077	1.5283e-06		0.794077	1.63816e-06		0.794077	1.69389e-06		0.794077	1.7302e-06
0.796971	1.78869e-06		0.796971	1.85161e-06		0.796971	1.52377e-06		0.796971	1.63181e-06		0.796971	1.68604e-06		0.796971	1.72101e-06
0.799865	1.78082e-06		0.799865	1.84204e-06		0.799865	1.51903e-06		0.799865	1.62525e-06		0.799865	1.67792e-06		0.799865	1.71152e-06
0.799865	1.78082e-06		0.799865	1.84204e-06		0.799865	1.51903e-06		0.799865	1.62525e-06		0.799865	1.67792e-06		0.799865	1.71152e-06
0.802759	1.77286e-06		0.802759	1.83238e-06		0.802759	1.51405e-06		0.802759	1.61845e-06		0.802759	1.66952e-06		0.802759	1.70171e-06
0.805653	1.76482e-06		0.805653	1.8226e-06		0.805653	1.50882e-06		0.805653	1.61137e-06		0.805653	1.66082e-06		0.805653	1.69156e-06
0.808547	1.75671e-06		0.808547	1.8127e-06		0.808547	1.50332e-06		0.808547	1.60399e-06		0.808547	1.65181e-06		0.808547	1.68107e-06
0.811441	1.74857e-06		0.811441	1.8027e-06		0.811441	1.49754e-06		0.811441	1.5963e-06		0.811441	1.64251e-06		0.811441	1.67026e-06
0.814334	1.74039e-06		0.814334	1.79262e-06		0.814334	1.49147e-06		0.814334	1.58831e-06		0.814334	1.63293e-06		0.814334	1.65915e-06
0.817228	1.73218e-06		0.817228	1.78246e-06		0.817228	1.48511e-06		0.817228	1.58001e-06		0.817228	1.62307e-06		0.817228	1.64774e-06
0.820122	1.72395e-06		0.820122	1.77222e-06		0.820122	1.47842e-06		0.820122	1.5714e-06		0.820122	1.61293e-06		0.820122	1.63605e-06
0.823016	1.71568e-06		0.823016	1.76188e-06		0.823016	1.47139e-06		0.823016	1.56247e-06		0.823016	1.60249e-06		0.823016	1.6241e-06
0.82591	1.70738e-06		0.82591	1.75143e-06		0.82591	1.46399e-06		0.82591	1.55323e-06		0.82591	1.59175e-06		0.82591	1.61189e-06
0.828804	1.69904e-06		0.828804	1.74086e-06		0.828804	1.45621e-06		0.828804	1.54368e-06		0.828804	1.58074e-06		0.828804	1.59947e-06
0.831698	1.69064e-06		0.831698	1.73017e-06		0.831698	1.44808e-06		0.831698	1.53383e-06		0.831698	1.56948e-06		0.831698	1.58684e-06
0.834592	1.6822e-06		0.834592	1.71937e-06		0.834592	1.4396e-06		0.834592	1.52369e-06		0.834592	1.55798e-06		0.834592	1.57405e-06
0.837486	1.67373e-06		0.837486	1.70849e-06		0.837486	1.43079e-06		0.837486	1.51326e-06		0.837486	1.54628e-06		0.837486	1.56112e-06
0.840379	1.66527e-06		0.840379	1.69756e-06		0.840379	1.42169e-06		0.840379	1.50257e-06		0.840379	1.5344e-06		0.840379	1.54808e-06
0.843273	1.65683e-06		0.843273	1.68657e-06		0.843273	1.41234e-06		0.843273	1.49165e-06		0.843273	1.52239e-06		0.843273	1.53498e-06
0.846167	1.64842e-06		0.846167	1.67557e-06		0.846167	1.40281e-06		0.846167	1.48056e-06		0.846167	1.51028e-06		0.846167	1.52188e-06
0.849061	1.64006e-06		0.849061	1.66457e-06		0.849061	1.39309e-06		0.849061	1.46933e-06		0.849061	1.49814e-06		0.849061	1.50883e-06
0.851955	1.63179e-06		0.851955	1.65363e-06		0.851955	1.38321e-06		0.851955	1.45805e-06		0.851955	1.48602e-06		0.851955	1.49592e-06
0.854849	1.62364e-06		0.854849	1.64285e-06		0.854849	1.37324e-06		0.854849	1.44679e-06		0.854849	1.474e-06		0.854849	1.48321e-06
0.857743	1.61563e-06		0.857743	1.63232e-06		0.857743	1.36327e-06		0.857743	1.43565e-06		0.857743	1.46219e-06		0.857743	1.47078e-06
0.860637	1.6079e-06		0.860637	1.62213e-06		0.860637	1.35342e-06		0.860637	1.42474e-06		0.860637	1.4507e-06		0.860637	1.45876e-06
0.863531	1.60058e-06		0.863531	1.6124e-06		0.863531	1.34384e-06		0.863531	1.41422e-06		0.863531	1.43965e-06		0.863531	1.44726e-06
0.866424	1.59376e-06		0.866424	1.60327e-06		0.866424	1.33472e-06		0.866424	1.40429e-06		0.866424	1.42925e-06		0.866424	1.43649e-06
0.869318	1.58762e-06		0.869318	1.59497e-06		0.869318	1.32635e-06		0.869318	1.39523e-06		0.869318	1.41976e-06		0.869318	1.42676e-06
0.872212	1.58244e-06		0.872212	1.58787e-06		0.872212	1.31911e-06		0.872212	1.38747e-06		0.872212	1.41162e-06		0.872212	1.41847e-06
0.875106	1.57864e-06		0.875106	1.58257e-06		0.875106	1.31365e-06		0.875106	1.38165e-06		0.875106	1.40557e-06		0.875106	1.41235e-06
0.878	1.57718e-06		0.878	1.58049e-06		0.878	1.3115e-06		0.878	1.37935e-06		0.878	1.40319e-06		0.878	1.40994e-06

## Sheet: no distribution 
SN 0			SN 0.2			SN 0.4			SN 0.6			SN 0.8			SN 1
Axial distance	no mass fraction		Axial distance	no mass fraction		Axial distance	no mass fraction		Axial distance	no mass fraction		Axial distance	no mass fraction		Axial distance	no mass fraction
0.00115113	4.41482e-06		0.00115113	4.71673e-06		0.00115113	9.83876e-07		0.00115113	4.88827e-07		0.00115113	3.02727e-07		0.00115113	1.59632e-07
0.00404502	6.44367e-06		0.00404502	6.79391e-06		0.00404502	1.17211e-06		0.00404502	6.63196e-07		0.00404502	3.5155e-07		0.00404502	1.77624e-07
0.00693891	8.85083e-06		0.00693891	9.17995e-06		0.00693891	1.35733e-06		0.00693891	8.3784e-07		0.00693891	3.92881e-07		0.00693891	1.89729e-07
0.0098328	1.15432e-05		0.0098328	1.17286e-05		0.0098328	1.58038e-06		0.0098328	9.978e-07		0.0098328	4.21393e-07		0.0098328	1.94002e-07
0.0127267	1.43789e-05		0.0127267	1.42544e-05		0.0127267	1.8745e-06		0.0127267	1.12421e-06		0.0127267	4.33533e-07		0.0127267	1.88879e-07
0.0156206	1.71805e-05		0.0156206	1.65534e-05		0.0156206	2.23968e-06		0.0156206	1.20351e-06		0.0156206	4.28156e-07		0.0156206	1.76464e-07
0.0185145	1.97633e-05		0.0185145	1.84423e-05		0.0185145	2.64287e-06		0.0185145	1.22126e-06		0.0185145	4.09293e-07		0.0185145	1.60623e-07
0.0214084	2.19802e-05		0.0214084	1.98163e-05		0.0214084	3.03906e-06		0.0214084	1.18588e-06		0.0214084	3.81847e-07		0.0214084	1.4952e-07
0.0243023	2.37343e-05		0.0243023	2.06477e-05		0.0243023	3.38713e-06		0.0243023	1.12025e-06		0.0243023	3.5439e-07		0.0243023	1.50169e-07
0.0271961	2.49793e-05		0.0271961	2.09601e-05		0.0271961	3.65781e-06		0.0271961	1.03751e-06		0.0271961	3.41205e-07		0.0271961	1.65603e-07
0.03009	2.5717e-05		0.03009	2.08331e-05		0.03009	3.83872e-06		0.03009	9.50718e-07		0.03009	3.58979e-07		0.03009	2.02297e-07
0.0329839	2.59859e-05		0.0329839	2.03734e-05		0.0329839	3.92974e-06		0.0329839	9.11995e-07		0.0329839	4.45677e-07		0.0329839	2.70173e-07
0.0358778	2.58607e-05		0.0358778	1.96784e-05		0.0358778	3.93729e-06		0.0358778	1.01516e-06		0.0358778	7.0786e-07		0.0358778	3.8355e-07
0.0387717	2.54241e-05		0.0387717	1.88393e-05		0.0387717	3.87636e-06		0.0387717	1.56288e-06		0.0387717	1.39249e-06		0.0387717	5.76484e-07
0.0416656	2.4749e-05		0.0416656	1.79412e-05		0.0416656	3.76466e-06		0.0416656	3.40301e-06		0.0416656	3.18629e-06		0.0416656	9.51485e-07
0.0445595	2.39043e-05		0.0445595	1.70596e-05		0.0445595	3.61369e-06		0.0445595	8.63059e-06		0.0445595	7.29323e-06		0.0445595	1.79649e-06
0.0474534	2.29549e-05		0.0474534	1.62673e-05		0.0474534	3.43377e-06		0.0474534	2.06847e-05		0.0474534	1.62702e-05		0.0474534	3.75784e-06
0.0503473	2.19573e-05		0.0503473	1.56268e-05		0.0503473	3.24242e-06		0.0503473	4.54659e-05		0.0503473	3.57039e-05		0.0503473	8.30749e-06
0.0532412	2.09609e-05		0.0532412	1.51786e-05		0.0532412	3.06318e-06		0.0532412	9.56504e-05		0.0532412	7.51543e-05		0.0532412	1.83676e-05
0.056135	2.00096e-05		0.056135	1.49374e-05		0.056135	2.99398e-06		0.056135	0.000186904		0.056135	0.00014708		0.056135	3.8616e-05
0.0590289	1.91412e-05		0.0590289	1.489e-05		0.0590289	3.32038e-06		0.0590289	0.000322171		0.0590289	0.00025701		0.0590289	7.71127e-05
0.0619228	1.83879e-05		0.0619228	1.50113e-05		0.0619228	4.94699e-06		0.0619228	0.000480185		0.0619228	0.000389541		0.0619228	0.000144162
0.0648167	1.77747e-05		0.0648167	1.52739e-05		0.0648167	1.01332e-05		0.0648167	0.000621162		0.0648167	0.000510445		0.0648167	0.000243969
0.0677106	1.73188e-05		0.0677106	1.56478e-05		0.0677106	2.2647e-05		0.0677106	0.000652567		0.0677106	0.000529038		0.0677106	0.000365746
0.0706045	1.70294e-05		0.0706045	1.61019e-05		0.0706045	4.88159e-05		0.0706045	0.000576479		0.0706045	0.000450416		0.0706045	0.000483337
0.0734984	1.69054e-05		0.0734984	1.66054e-05		0.0734984	9.71233e-05		0.0734984	0.000485738		0.0734984	0.000369374		0.0734984	0.000509535
0.0763923	1.69342e-05		0.0763923	1.71281e-05		0.0763923	0.000171713		0.0763923	0.000404966		0.0763923	0.000306087		0.0763923	0.000443532
0.0792862	1.71013e-05		0.0792862	1.76419e-05		0.0792862	0.000274071		0.0792862	0.000337371		0.0792862	0.000258656		0.0792862	0.000372191
0.0821801	1.73962e-05		0.0821801	1.81218e-05		0.0821801	0.000401982		0.0821801	0.000281881		0.0821801	0.000222222		0.0821801	0.000314089
0.085074	1.78062e-05		0.085074	1.85488e-05		0.085074	0.000546676		0.085074	0.000237278		0.085074	0.000193547		0.085074	0.000269671
0.085074	1.78062e-05		0.085074	1.85488e-05		0.085074	0.000546676		0.085074	0.000237278		0.085074	0.000193547		0.085074	0.000269671
0.0879678	1.83159e-05		0.0879678	1.89109e-05		0.0879678	0.000697795		0.0879678	0.000201619		0.0879678	0.000170466		0.0879678	0.000235785
0.0908617	1.89074e-05		0.0908617	1.92035e-05		0.0908617	0.000836816		0.0908617	0.000172823		0.0908617	0.000151956		0.0908617	0.000209712
0.0937556	1.95618e-05		0.0937556	1.94289e-05		0.0937556	0.000905043		0.0937556	0.000149456		0.0937556	0.000137186		0.0937556	0.000189494
0.0966495	2.02596e-05		0.0966495	1.95947e-05		0.0966495	0.000874094		0.0966495	0.00013055		0.0966495	0.000125385		0.0966495	0.000173686
0.0995434	2.09822e-05		0.0995434	1.97119e-05		0.0995434	0.000786344		0.0995434	0.000115232		0.0995434	0.000115968		0.0995434	0.000161316
0.102437	2.17134e-05		0.102437	1.97943e-05		0.102437	0.000684116		0.102437	0.000102814		0.102437	0.000108461		0.102437	0.000151628
0.105331	2.24363e-05		0.105331	1.98565e-05		0.105331	0.000586425		0.105331	9.27417e-05		0.105331	0.000102502		0.105331	0.000144052
0.108225	2.31331e-05		0.108225	1.99134e-05		0.108225	0.000498952		0.108225	8.46048e-05		0.108225	9.7769e-05		0.108225	0.000138127
0.111119	2.37913e-05		0.111119	1.99791e-05		0.111119	0.000424657		0.111119	7.80206e-05		0.111119	9.40047e-05		0.111119	0.000133497
0.114013	2.44018e-05		0.114013	2.00764e-05		0.114013	0.000362084		0.114013	7.26466e-05		0.114013	9.10299e-05		0.114013	0.000129894
0.116907	2.49579e-05		0.116907	2.02135e-05		0.116907	0.000309882		0.116907	6.82712e-05		0.116907	8.86899e-05		0.116907	0.0001271
0.119801	2.5455e-05		0.119801	2.0386e-05		0.119801	0.0002665		0.119801	6.47307e-05		0.119801	8.68558e-05		0.119801	0.000124926
0.122695	2.58908e-05		0.122695	2.06008e-05		0.122695	0.000230486		0.122695	6.18879e-05		0.122695	8.5421e-05		0.122695	0.000123226
0.125588	2.6265e-05		0.125588	2.08642e-05		0.125588	0.000200431		0.125588	5.96242e-05		0.125588	8.42979e-05		0.125588	0.000121893
0.128482	2.65794e-05		0.128482	2.118e-05		0.128482	0.000175317		0.128482	5.78373e-05		0.128482	8.34155e-05		0.128482	0.000120843
0.131376	2.68366e-05		0.131376	2.15494e-05		0.131376	0.000154304		0.131376	5.64389e-05		0.131376	8.2717e-05		0.131376	0.000120002
0.13427	2.70405e-05		0.13427	2.19711e-05		0.13427	0.000136536		0.13427	5.53532e-05		0.13427	8.21574e-05		0.13427	0.000119316
0.137164	2.7196e-05		0.137164	2.24422e-05		0.137164	0.000121398		0.137164	5.45163e-05		0.137164	8.17014e-05		0.137164	0.000118743
0.140058	2.73197e-05		0.140058	2.29582e-05		0.140058	0.00010843		0.140058	5.38748e-05		0.140058	8.13223e-05		0.140058	0.000118252
0.142952	2.74271e-05		0.142952	2.35137e-05		0.142952	9.72816e-05		0.142952	5.33845e-05		0.142952	8.10044e-05		0.142952	0.000117819
0.145846	2.75083e-05		0.145846	2.41029e-05		0.145846	8.76971e-05		0.145846	5.30097e-05		0.145846	8.07362e-05		0.145846	0.000117428
0.14874	2.75547e-05		0.14874	2.47188e-05		0.14874	7.94683e-05		0.14874	5.27219e-05		0.14874	8.05052e-05		0.14874	0.000117067
0.151633	2.75734e-05		0.151633	2.53545e-05		0.151633	7.24118e-05		0.151633	5.24988e-05		0.151633	8.0303e-05		0.151633	0.000116727
0.154527	2.75738e-05		0.154527	2.60031e-05		0.154527	6.63734e-05		0.154527	5.23231e-05		0.154527	8.01234e-05		0.154527	0.000116401
0.157421	2.75646e-05		0.157421	2.66583e-05		0.157421	6.12427e-05		0.157421	5.21818e-05		0.157421	7.99622e-05		0.157421	0.000116085
0.160315	2.75532e-05		0.160315	2.73147e-05		0.160315	5.69151e-05		0.160315	5.20649e-05		0.160315	7.98166e-05		0.160315	0.000115776
0.163209	2.75462e-05		0.163209	2.79675e-05		0.163209	5.32634e-05		0.163209	5.19653e-05		0.163209	7.96844e-05		0.163209	0.000115472
0.166103	2.75568e-05		0.166103	2.86226e-05		0.166103	5.01242e-05		0.166103	5.1877e-05		0.166103	7.95623e-05		0.166103	0.000115172
0.166103	2.75568e-05		0.166103	2.86226e-05		0.166103	5.01242e-05		0.166103	5.1877e-05		0.166103	7.95623e-05		0.166103	0.000115172
0.168997	2.75965e-05		0.168997	2.92769e-05		0.168997	4.73685e-05		0.168997	5.17901e-05		0.168997	7.94262e-05		0.168997	0.000114876
0.171891	2.76664e-05		0.171891	2.99262e-05		0.171891	4.49331e-05		0.171891	5.16977e-05		0.171891	7.92588e-05		0.171891	0.000114585
0.174785	2.77649e-05		0.174785	3.05683e-05		0.174785	4.27803e-05		0.174785	5.16e-05		0.174785	7.90674e-05		0.174785	0.000114299
0.177678	2.78913e-05		0.177678	3.11934e-05		0.177678	4.08748e-05		0.177678	5.14974e-05		0.177678	7.88567e-05		0.177678	0.000114017
0.180572	2.80475e-05		0.180572	3.18037e-05		0.180572	3.91866e-05		0.180572	5.13901e-05		0.180572	7.86297e-05		0.180572	0.00011374
0.183466	2.82345e-05		0.183466	3.24047e-05		0.183466	3.76889e-05		0.183466	5.12785e-05		0.183466	7.83884e-05		0.183466	0.000113467
0.18636	2.8453e-05		0.18636	3.30028e-05		0.18636	3.63565e-05		0.18636	5.11628e-05		0.18636	7.81341e-05		0.18636	0.000113195
0.189254	2.87079e-05		0.189254	3.36038e-05		0.189254	3.51681e-05		0.189254	5.10436e-05		0.189254	7.78676e-05		0.189254	0.00011292
0.192148	2.89939e-05		0.192148	3.42215e-05		0.192148	3.41052e-05		0.192148	5.09212e-05		0.192148	7.75897e-05		0.192148	0.000112649
0.195042	2.93024e-05		0.195042	3.48608e-05		0.195042	3.31529e-05		0.195042	5.07962e-05		0.195042	7.73005e-05		0.195042	0.000112389
0.197936	2.96362e-05		0.197936	3.55258e-05		0.197936	3.22979e-05		0.197936	5.06688e-05		0.197936	7.70003e-05		0.197936	0.000112134
0.20083	2.99984e-05		0.20083	3.62297e-05		0.20083	3.15288e-05		0.20083	5.05395e-05		0.20083	7.66891e-05		0.20083	0.000111881
0.203723	3.03922e-05		0.203723	3.69689e-05		0.203723	3.08347e-05		0.203723	5.04085e-05		0.203723	7.63667e-05		0.203723	0.00011163
0.206617	3.08202e-05		0.206617	3.77414e-05		0.206617	3.01988e-05		0.206617	5.02762e-05		0.206617	7.60325e-05		0.206617	0.000111382
0.209511	3.1284e-05		0.209511	3.85591e-05		0.209511	2.9609e-05		0.209511	5.01428e-05		0.209511	7.56859e-05		0.209511	0.000111137
0.212405	3.17846e-05		0.212405	3.94369e-05		0.212405	2.90639e-05		0.212405	5.00087e-05		0.212405	7.53253e-05		0.212405	0.000110902
0.215299	3.23222e-05		0.215299	4.03893e-05		0.215299	2.85622e-05		0.215299	4.98742e-05		0.215299	7.49479e-05		0.215299	0.000110686
0.215299	3.23222e-05		0.215299	4.03893e-05		0.215299	2.85622e-05		0.215299	4.98742e-05		0.215299	7.49479e-05		0.215299	0.000110686
0.218193	3.29021e-05		0.218193	4.14302e-05		0.218193	2.80967e-05		0.218193	4.97381e-05		0.218193	7.45606e-05		0.218193	0.000110473
0.221087	3.35294e-05		0.221087	4.25726e-05		0.221087	2.76572e-05		0.221087	4.95982e-05		0.221087	7.41746e-05		0.221087	0.000110236
0.223981	3.42025e-05		0.223981	4.38287e-05		0.223981	2.72394e-05		0.223981	4.94538e-05		0.223981	7.37936e-05		0.223981	0.000109967
0.226875	3.49187e-05		0.226875	4.52168e-05		0.226875	2.6842e-05		0.226875	4.93046e-05		0.226875	7.34184e-05		0.226875	0.000109668
0.229768	3.56758e-05		0.229768	4.67544e-05		0.229768	2.64651e-05		0.229768	4.91509e-05		0.229768	7.30564e-05		0.229768	0.00010934
0.232662	3.64732e-05		0.232662	4.844e-05		0.232662	2.6109e-05		0.232662	4.89943e-05		0.232662	7.27132e-05		0.232662	0.000108988
0.235556	3.73147e-05		0.235556	5.02785e-05		0.235556	2.57744e-05		0.235556	4.88361e-05		0.235556	7.23848e-05		0.235556	0.000108614
0.23845	3.81918e-05		0.23845	5.22783e-05		0.23845	2.54618e-05		0.23845	4.86764e-05		0.23845	7.20687e-05		0.23845	0.00010822
0.241344	3.91059e-05		0.241344	5.44515e-05		0.241344	2.51717e-05		0.241344	4.85154e-05		0.241344	7.17627e-05		0.241344	0.000107809
0.244238	4.00693e-05		0.244238	5.68183e-05		0.244238	2.48996e-05		0.244238	4.83533e-05		0.244238	7.14655e-05		0.244238	0.000107382
0.247132	4.10824e-05		0.247132	5.938e-05		0.247132	2.46389e-05		0.247132	4.81902e-05		0.247132	7.11757e-05		0.247132	0.00010694
0.250026	4.21488e-05		0.250026	6.21358e-05		0.250026	2.43873e-05		0.250026	4.80263e-05		0.250026	7.08925e-05		0.250026	0.000106484
0.25292	4.32742e-05		0.25292	6.5097e-05		0.25292	2.41441e-05		0.25292	4.78617e-05		0.25292	7.06152e-05		0.25292	0.000106014
0.255814	4.44645e-05		0.255814	6.82839e-05		0.255814	2.39094e-05		0.255814	4.76964e-05		0.255814	7.03434e-05		0.255814	0.000105531
0.258707	4.57264e-05		0.258707	7.17062e-05		0.258707	2.36835e-05		0.258707	4.75307e-05		0.258707	7.00766e-05		0.258707	0.000105036
0.261601	4.70649e-05		0.261601	7.53671e-05		0.261601	2.34667e-05		0.261601	4.73645e-05		0.261601	6.98147e-05		0.261601	0.000104529
0.264495	4.84917e-05		0.264495	7.92806e-05		0.264495	2.32591e-05		0.264495	4.71979e-05		0.264495	6.95576e-05		0.264495	0.000104011
0.267389	5.00266e-05		0.267389	8.34595e-05		0.267389	2.30608e-05		0.267389	4.70311e-05		0.267389	6.93054e-05		0.267389	0.000103483
0.270283	5.16853e-05		0.270283	8.79187e-05		0.270283	2.28714e-05		0.270283	4.68641e-05		0.270283	6.90583e-05		0.270283	0.000102946
0.273177	5.34825e-05		0.273177	9.26639e-05		0.273177	2.26905e-05		0.273177	4.6697e-05		0.273177	6.88167e-05		0.273177	0.000102399
0.276071	5.54326e-05		0.276071	9.76811e-05		0.276071	2.25177e-05		0.276071	4.65298e-05		0.276071	6.85812e-05		0.276071	0.000101844
0.278965	5.75445e-05		0.278965	0.000102959		0.278965	2.23525e-05		0.278965	4.63626e-05		0.278965	6.83529e-05		0.278965	0.000101281
0.281859	5.98283e-05		0.281859	0.000108497		0.281859	2.21941e-05		0.281859	4.61955e-05		0.281859	6.81332e-05		0.281859	0.00010071
0.284752	6.23009e-05		0.284752	0.000114318		0.284752	2.20419e-05		0.284752	4.60284e-05		0.284752	6.79242e-05		0.284752	0.000100132
0.287646	6.49815e-05		0.287646	0.000120442		0.287646	2.18951e-05		0.287646	4.58616e-05		0.287646	6.77286e-05		0.287646	9.95459e-05
0.29054	6.7889e-05		0.29054	0.000126877		0.29054	2.17529e-05		0.29054	4.56949e-05		0.29054	6.75486e-05		0.29054	9.89533e-05
0.293434	7.10409e-05		0.293434	0.000133658		0.293434	2.16147e-05		0.293434	4.55284e-05		0.293434	6.73639e-05		0.293434	9.8354e-05
0.296328	7.4453e-05		0.296328	0.000140828		0.296328	2.14799e-05		0.296328	4.53622e-05		0.296328	6.71551e-05		0.296328	9.77481e-05
0.299222	7.81431e-05		0.299222	0.000148408		0.299222	2.13452e-05		0.299222	4.51962e-05		0.299222	6.69249e-05		0.299222	9.71333e-05
0.302116	8.2129e-05		0.302116	0.000156425		0.302116	2.12065e-05		0.302116	4.50304e-05		0.302116	6.66742e-05		0.302116	9.65074e-05
0.30501	8.64242e-05		0.30501	0.00016493		0.30501	2.10613e-05		0.30501	4.48649e-05		0.30501	6.64034e-05		0.30501	9.58704e-05
0.307904	9.1044e-05		0.307904	0.000173979		0.307904	2.09071e-05		0.307904	4.46995e-05		0.307904	6.61124e-05		0.307904	9.52221e-05
0.310797	9.60095e-05		0.310797	0.000183626		0.310797	2.07412e-05		0.310797	4.45341e-05		0.310797	6.58007e-05		0.310797	9.45625e-05
0.313691	0.00010134		0.313691	0.000193918		0.313691	2.05615e-05		0.313691	4.43708e-05		0.313691	6.54681e-05		0.313691	9.3892e-05
0.313691	0.00010134		0.313691	0.000193918		0.313691	2.05615e-05		0.313691	4.43708e-05		0.313691	6.54681e-05		0.313691	9.3892e-05
0.316585	0.000107052		0.316585	0.0002049		0.316585	2.03873e-05		0.316585	4.42079e-05		0.316585	6.51274e-05		0.316585	9.32205e-05
0.319479	0.000113167		0.319479	0.000216616		0.319479	2.0237e-05		0.319479	4.40424e-05		0.319479	6.47896e-05		0.319479	9.25569e-05
0.322373	0.000119719		0.322373	0.000229114		0.322373	2.01059e-05		0.322373	4.3875e-05		0.322373	6.44521e-05		0.322373	9.18994e-05
0.325267	0.000126739		0.325267	0.000242453		0.325267	1.999e-05		0.325267	4.3706e-05		0.325267	6.41128e-05		0.325267	9.12466e-05
0.328161	0.000134262		0.328161	0.000256714		0.328161	1.9886e-05		0.328161	4.35359e-05		0.328161	6.37706e-05		0.328161	9.05969e-05
0.331055	0.000142347		0.331055	0.000271983		0.331055	1.97915e-05		0.331055	4.33648e-05		0.331055	6.34244e-05		0.331055	8.99494e-05
0.333949	0.00015106		0.333949	0.000288368		0.333949	1.97046e-05		0.333949	4.3193e-05		0.333949	6.30738e-05		0.333949	8.93026e-05
0.336842	0.000160466		0.336842	0.000305994		0.336842	1.96239e-05		0.336842	4.30205e-05		0.336842	6.27183e-05		0.336842	8.86557e-05
0.339736	0.000170634		0.339736	0.000324935		0.339736	1.95484e-05		0.339736	4.28475e-05		0.339736	6.23574e-05		0.339736	8.80079e-05
0.34263	0.000181648		0.34263	0.000345277		0.34263	1.94773e-05		0.34263	4.26741e-05		0.34263	6.19905e-05		0.34263	8.73659e-05
0.345524	0.000193589		0.345524	0.000367213		0.345524	1.94101e-05		0.345524	4.25002e-05		0.345524	6.16174e-05		0.345524	8.67367e-05
0.348418	0.00020653		0.348418	0.000390905		0.348418	1.93462e-05		0.348418	4.23259e-05		0.348418	6.12446e-05		0.348418	8.61197e-05
0.351312	0.000220536		0.351312	0.000416606		0.351312	1.92854e-05		0.351312	4.21513e-05		0.351312	6.0879e-05		0.351312	8.5515e-05
0.354206	0.00023566		0.354206	0.000444744		0.354206	1.92273e-05		0.354206	4.19764e-05		0.354206	6.05209e-05		0.354206	8.49227e-05
0.3571	0.000251961		0.3571	0.000475755		0.3571	1.91716e-05		0.3571	4.18012e-05		0.3571	6.01709e-05		0.3571	8.43432e-05
0.359994	0.00026948		0.359994	0.000510117		0.359994	1.91181e-05		0.359994	4.16257e-05		0.359994	5.98297e-05		0.359994	8.3777e-05
0.362887	0.000288249		0.362887	0.000548406		0.362887	1.90667e-05		0.362887	4.14499e-05		0.362887	5.94977e-05		0.362887	8.32247e-05
0.365781	0.00030833		0.365781	0.000590926		0.365781	1.90171e-05		0.365781	4.12739e-05		0.365781	5.91755e-05		0.365781	8.26868e-05
0.368675	0.000329828		0.368675	0.000639263		0.368675	1.89693e-05		0.368675	4.10975e-05		0.368675	5.88637e-05		0.368675	8.21642e-05
0.371569	0.00035293		0.371569	0.000695377		0.371569	1.89229e-05		0.371569	4.09209e-05		0.371569	5.85629e-05		0.371569	8.16575e-05
0.374463	0.000377826		0.374463	0.000761271		0.374463	1.8878e-05		0.374463	4.07439e-05		0.374463	5.82736e-05		0.374463	8.11679e-05
0.377357	0.000404684		0.377357	0.000839561		0.377357	1.88344e-05		0.377357	4.05665e-05		0.377357	5.79966e-05		0.377357	8.06984e-05
0.380251	0.000433653		0.380251	0.000933885		0.380251	1.87923e-05		0.380251	4.03885e-05		0.380251	5.77327e-05		0.380251	8.02453e-05
0.383145	0.00046493		0.383145	0.00104795		0.383145	1.87518e-05		0.383145	4.02108e-05		0.383145	5.74825e-05		0.383145	7.98023e-05
0.386039	0.000498778		0.386039	0.00117882		0.386039	1.87134e-05		0.386039	4.00343e-05		0.386039	5.7247e-05		0.386039	7.93686e-05
0.388932	0.000535504		0.388932	0.00132238		0.388932	1.86779e-05		0.388932	3.98589e-05		0.388932	5.70274e-05		0.388932	7.8944e-05
0.391826	0.00057567		0.391826	0.00146681		0.391826	1.86468e-05		0.391826	3.96846e-05		0.391826	5.68252e-05		0.391826	7.85285e-05
0.39472	0.00061971		0.39472	0.00159948		0.39472	1.86222e-05		0.39472	3.95111e-05		0.39472	5.66426e-05		0.39472	7.81221e-05
0.397614	0.000668744		0.397614	0.00172032		0.397614	1.86077e-05		0.397614	3.93384e-05		0.397614	5.64664e-05		0.397614	7.77247e-05
0.400508	0.000724067		0.400508	0.0018271		0.400508	1.86079e-05		0.400508	3.91663e-05		0.400508	5.62799e-05		0.400508	7.73365e-05
0.403402	0.000787301		0.403402	0.00191522		0.403402	1.86288e-05		0.403402	3.89944e-05		0.403402	5.60799e-05		0.403402	7.6956e-05
0.403402	0.000787301		0.403402	0.00191522		0.403402	1.86288e-05		0.403402	3.89944e-05		0.403402	5.60799e-05		0.403402	7.6956e-05
0.406296	0.000861667		0.406296	0.00198426		0.406296	1.86503e-05		0.406296	3.88226e-05		0.406296	5.5868e-05		0.406296	7.6573e-05
0.40919	0.000951276		0.40919	0.00203603		0.40919	1.86509e-05		0.40919	3.86503e-05		0.40919	5.5647e-05		0.40919	7.61773e-05
0.412084	0.0010584		0.412084	0.00207242		0.412084	1.86342e-05		0.412084	3.84775e-05		0.412084	5.54163e-05		0.412084	7.57666e-05
0.414977	0.00117979		0.414977	0.00209604		0.414977	1.86029e-05		0.414977	3.83041e-05		0.414977	5.51756e-05		0.414977	7.53402e-05
0.417871	0.00130309		0.417871	0.00210479		0.417871	1.85591e-05		0.417871	3.813e-05		0.417871	5.49251e-05		0.417871	7.48976e-05
0.420765	0.00141838		0.420765	0.0021002		0.420765	1.85048e-05		0.420765	3.79552e-05		0.420765	5.46647e-05		0.420765	7.44433e-05
0.423659	0.00152171		0.423659	0.00208816		0.423659	1.84417e-05		0.423659	3.77799e-05		0.423659	5.43947e-05		0.423659	7.39821e-05
0.426553	0.00161027		0.426553	0.00206677		0.426553	1.83714e-05		0.426553	3.76041e-05		0.426553	5.41154e-05		0.426553	7.35143e-05
0.429447	0.0016833		0.429447	0.00203473		0.429447	1.82955e-05		0.429447	3.74282e-05		0.429447	5.38272e-05		0.429447	7.30402e-05
0.432341	0.00173943		0.432341	0.00199476		0.432341	1.82157e-05		0.432341	3.72524e-05		0.432341	5.35304e-05		0.432341	7.25603e-05
0.435235	0.00177752		0.435235	0.00194869		0.435235	1.81326e-05		0.435235	3.7077e-05		0.435235	5.32255e-05		0.435235	7.20752e-05
0.438129	0.0017994		0.438129	0.00189746		0.438129	1.80457e-05		0.438129	3.69024e-05		0.438129	5.29131e-05		0.438129	7.15851e-05
0.441023	0.0018061		0.441023	0.00184232		0.441023	1.79555e-05		0.441023	3.67288e-05		0.441023	5.25938e-05		0.441023	7.10906e-05
0.443916	0.00180221		0.443916	0.00178349		0.443916	1.78617e-05		0.443916	3.65567e-05		0.443916	5.2268e-05		0.443916	7.0592e-05
0.44681	0.00178967		0.44681	0.00172166		0.44681	1.77644e-05		0.44681	3.6385e-05		0.44681	5.19372e-05		0.44681	7.00894e-05
0.449704	0.00176508		0.449704	0.00165842		0.449704	1.76643e-05		0.449704	3.62127e-05		0.449704	5.16024e-05		0.449704	6.9583e-05
0.452598	0.00173121		0.452598	0.00159386		0.452598	1.75619e-05		0.452598	3.60398e-05		0.452598	5.12646e-05		0.452598	6.90728e-05
0.455492	0.00169096		0.455492	0.00152824		0.455492	1.74579e-05		0.455492	3.58666e-05		0.455492	5.09243e-05		0.455492	6.8559e-05
0.458386	0.00164469		0.458386	0.00146266		0.458386	1.7353e-05		0.458386	3.56931e-05		0.458386	5.05824e-05		0.458386	6.80441e-05
0.46128	0.0015937		0.46128	0.00139772		0.46128	1.72478e-05		0.46128	3.55193e-05		0.46128	5.02394e-05		0.46128	6.75306e-05
0.464174	0.00153999		0.464174	0.00133376		0.464174	1.71426e-05		0.464174	3.53455e-05		0.464174	4.98959e-05		0.464174	6.70187e-05
0.467068	0.00148386		0.467068	0.00127093		0.467068	1.7038e-05		0.467068	3.51715e-05		0.467068	4.95526e-05		0.467068	6.65084e-05
0.469961	0.00142605		0.469961	0.00120943		0.469961	1.69344e-05		0.469961	3.49976e-05		0.469961	4.92098e-05		0.469961	6.6e-05
0.472855	0.00136723		0.472855	0.00114958		0.472855	1.68322e-05		0.472855	3.48238e-05		0.472855	4.8868e-05		0.472855	6.54933e-05
0.475749	0.00130804		0.475749	0.00109155		0.475749	1.67317e-05		0.475749	3.46502e-05		0.475749	4.85273e-05		0.475749	6.49884e-05
0.478643	0.00124855		0.478643	0.00103543		0.478643	1.66332e-05		0.478643	3.44769e-05		0.478643	4.81881e-05		0.478643	6.44852e-05
0.481537	0.00118917		0.481537	0.000981162		0.481537	1.65371e-05		0.481537	3.43038e-05		0.481537	4.78505e-05		0.481537	6.39836e-05
0.484431	0.00113065		0.484431	0.000928975		0.484431	1.64436e-05		0.484431	3.41312e-05		0.484431	4.75144e-05		0.484431	6.34833e-05
0.487325	0.00107331		0.487325	0.000879117		0.487325	1.63532e-05		0.487325	3.3959e-05		0.487325	4.71799e-05		0.487325	6.29839e-05
0.490219	0.00101777		0.490219	0.000831457		0.490219	1.62661e-05		0.490219	3.37873e-05		0.490219	4.68468e-05		0.490219	6.24852e-05
0.493113	0.00096421		0.493113	0.000786105		0.493113	1.61827e-05		0.493113	3.36161e-05		0.493113	4.65182e-05		0.493113	6.19868e-05
0.496006	0.00091248		0.496006	0.00074298		0.496006	1.61034e-05		0.496006	3.34456e-05		0.496006	4.61972e-05		0.496006	6.14934e-05
0.4989	0.000862573		0.4989	0.000701846		0.4989	1.60287e-05		0.4989	3.32758e-05		0.4989	4.5884e-05		0.4989	6.10105e-05
0.501794	0.000814422		0.501794	0.000662683		0.501794	1.5959e-05		0.501794	3.31066e-05		0.501794	4.5579e-05		0.501794	6.05383e-05
0.504688	0.00076836		0.504688	0.000625264		0.504688	1.58947e-05		0.504688	3.29382e-05		0.504688	4.52823e-05		0.504688	6.00772e-05
0.507582	0.000724526		0.507582	0.000589624		0.507582	1.58365e-05		0.507582	3.27705e-05		0.507582	4.49942e-05		0.507582	5.96278e-05
0.510476	0.000682535		0.510476	0.000556037		0.510476	1.57848e-05		0.510476	3.26036e-05		0.510476	4.47152e-05		0.510476	5.91908e-05
0.51337	0.000642264		0.51337	0.000524042		0.51337	1.57401e-05		0.51337	3.24374e-05		0.51337	4.44459e-05		0.51337	5.87671e-05
0.516264	0.000603698		0.516264	0.000493306		0.516264	1.57029e-05		0.516264	3.2272e-05		0.516264	4.41868e-05		0.516264	5.83581e-05
0.519158	0.000567006		0.519158	0.000464158		0.519158	1.56735e-05		0.519158	3.21074e-05		0.519158	4.39392e-05		0.519158	5.79655e-05
0.522051	0.000532372		0.522051	0.000437145		0.522051	1.56523e-05		0.522051	3.19437e-05		0.522051	4.37043e-05		0.522051	5.75915e-05
0.524945	0.00050038		0.524945	0.000412429		0.524945	1.56394e-05		0.524945	3.17809e-05		0.524945	4.34841e-05		0.524945	5.7239e-05
0.524945	0.00050038		0.524945	0.000412429		0.524945	1.56394e-05		0.524945	3.17809e-05		0.524945	4.34841e-05		0.524945	5.7239e-05
0.527839	0.000471002		0.527839	0.00038943		0.527839	1.56335e-05		0.527839	3.1619e-05		0.527839	4.3272e-05		0.527839	5.68952e-05
0.530733	0.000443376		0.530733	0.000367765		0.530733	1.5633e-05		0.530733	3.14579e-05		0.530733	4.30603e-05		0.530733	5.65449e-05
0.533627	0.000417284		0.533627	0.000347402		0.533627	1.56369e-05		0.533627	3.12977e-05		0.533627	4.28481e-05		0.533627	5.61864e-05
0.536521	0.000392677		0.536521	0.000328289		0.536521	1.56439e-05		0.536521	3.11384e-05		0.536521	4.26348e-05		0.536521	5.58244e-05
0.539415	0.000369478		0.539415	0.000310371		0.539415	1.56527e-05		0.539415	3.098e-05		0.539415	4.24212e-05		0.539415	5.54644e-05
0.542309	0.000347713		0.542309	0.000293563		0.542309	1.56617e-05		0.542309	3.08226e-05		0.542309	4.22084e-05		0.542309	5.51062e-05
0.545203	0.000327358		0.545203	0.00027777		0.545203	1.56694e-05		0.545203	3.06662e-05		0.545203	4.19961e-05		0.545203	5.47489e-05
0.548096	0.000308265		0.548096	0.000262934		0.548096	1.56743e-05		0.548096	3.05108e-05		0.548096	4.17838e-05		0.548096	5.43918e-05
0.55099	0.000290349		0.55099	0.000248977		0.55099	1.56752e-05		0.55099	3.03565e-05		0.55099	4.15712e-05		0.55099	5.40341e-05
0.553884	0.00027343		0.553884	0.000235786		0.553884	1.5671e-05		0.553884	3.02033e-05		0.553884	4.1358e-05		0.553884	5.36754e-05
0.556778	0.000257401		0.556778	0.000223304		0.556778	1.56609e-05		0.556778	3.00512e-05		0.556778	4.1144e-05		0.556778	5.3315e-05
0.559672	0.000242307		0.559672	0.000211546		0.559672	1.56452e-05		0.559672	2.99004e-05		0.559672	4.0929e-05		0.559672	5.29524e-05
0.562566	0.000228199		0.562566	0.000200485		0.562566	1.56253e-05		0.562566	2.97507e-05		0.562566	4.07129e-05		0.562566	5.25872e-05
0.56546	0.000215021		0.56546	0.000190089		0.56546	1.56021e-05		0.56546	2.96024e-05		0.56546	4.04957e-05		0.56546	5.22191e-05
0.568354	0.000202575		0.568354	0.000180433		0.568354	1.55763e-05		0.568354	2.94548e-05		0.568354	4.02772e-05		0.568354	5.18475e-05
0.571248	0.000190907		0.571248	0.000171351		0.571248	1.55478e-05		0.571248	2.93073e-05		0.571248	4.00573e-05		0.571248	5.1472e-05
0.574142	0.000180139		0.574142	0.000162735		0.574142	1.55161e-05		0.574142	2.91597e-05		0.574142	3.9836e-05		0.574142	5.1092e-05
0.577035	0.00017017		0.577035	0.000154731		0.577035	1.54802e-05		0.577035	2.90121e-05		0.577035	3.9613e-05		0.577035	5.07113e-05
0.579929	0.000160866		0.579929	0.000147301		0.579929	1.54385e-05		0.579929	2.88644e-05		0.579929	3.93883e-05		0.579929	5.03343e-05
0.582823	0.000152255		0.582823	0.000140361		0.582823	1.53889e-05		0.582823	2.87168e-05		0.582823	3.91617e-05		0.582823	4.99613e-05
0.585717	0.000144089		0.585717	0.000133848		0.585717	1.53282e-05		0.585717	2.85696e-05		0.585717	3.89329e-05		0.585717	4.95925e-05
0.588611	0.000136168		0.588611	0.000127741		0.588611	1.52519e-05		0.588611	2.84229e-05		0.588611	3.87037e-05		0.588611	4.92281e-05
0.591505	0.000128612		0.591505	0.000122031		0.591505	1.51686e-05		0.591505	2.82767e-05		0.591505	3.84758e-05		0.591505	4.88685e-05
0.594399	0.000121468		0.594399	0.000116668		0.594399	1.50918e-05		0.594399	2.8131e-05		0.594399	3.82494e-05		0.594399	4.8514e-05
0.597293	0.000114856		0.597293	0.000111467		0.597293	1.5022e-05		0.597293	2.79859e-05		0.597293	3.80247e-05		0.597293	4.81647e-05
0.600186	0.0001089		0.600186	0.000106342		0.600186	1.49575e-05		0.600186	2.78415e-05		0.600186	3.78018e-05		0.600186	4.7821e-05
0.60308	0.000103578		0.60308	0.000101361		0.60308	1.48965e-05		0.60308	2.76976e-05		0.60308	3.75807e-05		0.60308	4.74833e-05
0.605974	9.88763e-05		0.605974	9.66052e-05		0.605974	1.4838e-05		0.605974	2.75545e-05		0.605974	3.73617e-05		0.605974	4.7152e-05
0.608868	9.45918e-05		0.608868	9.21324e-05		0.608868	1.47812e-05		0.608868	2.74121e-05		0.608868	3.71447e-05		0.608868	4.68272e-05
0.611762	9.0479e-05		0.611762	8.79489e-05		0.611762	1.47256e-05		0.611762	2.72706e-05		0.611762	3.693e-05		0.611762	4.65094e-05
0.614656	8.66177e-05		0.614656	8.40634e-05		0.614656	1.4671e-05		0.614656	2.71299e-05		0.614656	3.67175e-05		0.614656	4.61983e-05
0.61755	8.29601e-05		0.61755	8.0469e-05		0.61755	1.46175e-05		0.61755	2.69901e-05		0.61755	3.65074e-05		0.61755	4.58928e-05
0.620444	7.93745e-05		0.620444	7.71094e-05		0.620444	1.45655e-05		0.620444	2.68514e-05		0.620444	3.62999e-05		0.620444	4.55949e-05
0.623338	7.588e-05		0.623338	7.39544e-05		0.623338	1.45153e-05		0.623338	2.67137e-05		0.623338	3.60951e-05		0.623338	4.53068e-05
0.626231	7.25047e-05		0.626231	7.10432e-05		0.626231	1.44675e-05		0.626231	2.65771e-05		0.626231	3.58931e-05		0.626231	4.50271e-05
0.629125	6.9262e-05		0.629125	6.84505e-05		0.629125	1.44227e-05		0.629125	2.64415e-05		0.629125	3.56943e-05		0.629125	4.47558e-05
0.632019	6.61664e-05		0.632019	6.60475e-05		0.632019	1.43815e-05		0.632019	2.63071e-05		0.632019	3.54989e-05		0.632019	4.4493e-05
0.634913	6.32403e-05		0.634913	6.36578e-05		0.634913	1.4345e-05		0.634913	2.61737e-05		0.634913	3.53075e-05		0.634913	4.42395e-05
0.637807	6.05238e-05		0.637807	6.13218e-05		0.637807	1.43146e-05		0.637807	2.60414e-05		0.637807	3.51207e-05		0.637807	4.39966e-05
0.640701	5.80649e-05		0.640701	5.91007e-05		0.640701	1.42925e-05		0.640701	2.59103e-05		0.640701	3.49369e-05		0.640701	4.37669e-05
0.643595	5.58264e-05		0.643595	5.7063e-05		0.643595	1.42825e-05		0.643595	2.57804e-05		0.643595	3.4754e-05		0.643595	4.35563e-05
0.643595	5.58264e-05		0.643595	5.7063e-05		0.643595	1.42825e-05		0.643595	2.57804e-05		0.643595	3.4754e-05		0.643595	4.35563e-05
0.646489	5.37286e-05		0.646489	5.52056e-05		0.646489	1.42801e-05		0.646489	2.56517e-05		0.646489	3.45722e-05		0.646489	4.33568e-05
0.649383	5.17546e-05		0.649383	5.34786e-05		0.649383	1.42782e-05		0.649383	2.5524e-05		0.649383	3.43915e-05		0.649383	4.3157e-05
0.652277	4.99087e-05		0.652277	5.1872e-05		0.652277	1.42761e-05		0.652277	2.53974e-05		0.652277	3.42119e-05		0.652277	4.29566e-05
0.65517	4.81815e-05		0.65517	5.03681e-05		0.65517	1.42727e-05		0.65517	2.52718e-05		0.65517	3.40333e-05		0.65517	4.27542e-05
0.658064	4.65597e-05		0.658064	4.89465e-05		0.658064	1.4267e-05		0.658064	2.51473e-05		0.658064	3.38558e-05		0.658064	4.2548e-05
0.660958	4.50363e-05		0.660958	4.75894e-05		0.660958	1.42581e-05		0.660958	2.50237e-05		0.660958	3.36789e-05		0.660958	4.23363e-05
0.663852	4.36056e-05		0.663852	4.62847e-05		0.663852	1.42446e-05		0.663852	2.49012e-05		0.663852	3.35027e-05		0.663852	4.21172e-05
0.666746	4.22516e-05		0.666746	4.50223e-05		0.666746	1.42266e-05		0.666746	2.47797e-05		0.666746	3.33268e-05		0.666746	4.18939e-05
0.66964	4.09582e-05		0.66964	4.38046e-05		0.66964	1.42056e-05		0.66964	2.46592e-05		0.66964	3.31511e-05		0.66964	4.16701e-05
0.672534	3.97223e-05		0.672534	4.26379e-05		0.672534	1.41831e-05		0.672534	2.45398e-05		0.672534	3.29752e-05		0.672534	4.14457e-05
0.675428	3.8542e-05		0.675428	4.15199e-05		0.675428	1.416e-05		0.675428	2.44214e-05		0.675428	3.27991e-05		0.675428	4.12204e-05
0.678322	3.74148e-05		0.678322	4.04493e-05		0.678322	1.41365e-05		0.678322	2.43042e-05		0.678322	3.26224e-05		0.678322	4.09944e-05
0.681215	3.63386e-05		0.681215	3.94267e-05		0.681215	1.41123e-05		0.681215	2.41881e-05		0.681215	3.24451e-05		0.681215	4.07674e-05
0.684109	3.53137e-05		0.684109	3.84389e-05		0.684109	1.40873e-05		0.684109	2.40731e-05		0.684109	3.22669e-05		0.684109	4.05393e-05
0.687003	3.43411e-05		0.687003	3.74698e-05		0.687003	1.40615e-05		0.687003	2.39594e-05		0.687003	3.20876e-05		0.687003	4.03101e-05
0.689897	3.34229e-05		0.689897	3.6517e-05		0.689897	1.40348e-05		0.689897	2.38471e-05		0.689897	3.1907e-05		0.689897	4.00797e-05
0.692791	3.25732e-05		0.692791	3.55801e-05		0.692791	1.40073e-05		0.692791	2.37357e-05		0.692791	3.17247e-05		0.692791	3.9848e-05
0.695685	3.17743e-05		0.695685	3.46597e-05		0.695685	1.39792e-05		0.695685	2.36245e-05		0.695685	3.15418e-05		0.695685	3.96151e-05
0.698579	3.09935e-05		0.698579	3.37575e-05		0.698579	1.39506e-05		0.698579	2.35135e-05		0.698579	3.13598e-05		0.698579	3.93808e-05
0.701473	3.02303e-05		0.701473	3.2883e-05		0.701473	1.3922e-05		0.701473	2.34026e-05		0.701473	3.11787e-05		0.701473	3.91454e-05
0.704367	2.94873e-05		0.704367	3.20477e-05		0.704367	1.38939e-05		0.704367	2.32918e-05		0.704367	3.09986e-05		0.704367	3.89091e-05
0.70726	2.87678e-05		0.70726	3.12586e-05		0.70726	1.38668e-05		0.70726	2.3181e-05		0.70726	3.08196e-05		0.70726	3.86725e-05
0.710154	2.80853e-05		0.710154	3.05257e-05		0.710154	1.38419e-05		0.710154	2.30703e-05		0.710154	3.0642e-05		0.710154	3.84365e-05
0.713048	2.7458e-05		0.713048	2.98637e-05		0.713048	1.38203e-05		0.713048	2.29594e-05		0.713048	3.04662e-05		0.713048	3.82025e-05
0.715942	2.68991e-05		0.715942	2.92929e-05		0.715942	1.38038e-05		0.715942	2.28484e-05		0.715942	3.0293e-05		0.715942	3.79763e-05
0.715942	2.68991e-05		0.715942	2.92929e-05		0.715942	1.38038e-05		0.715942	2.28484e-05		0.715942	3.0293e-05		0.715942	3.79763e-05
0.718836	2.6391e-05		0.718836	2.87884e-05		0.718836	1.37898e-05		0.718836	2.27371e-05		0.718836	3.01209e-05		0.718836	3.7756e-05
0.72173	2.59079e-05		0.72173	2.83125e-05		0.72173	1.37744e-05		0.72173	2.26257e-05		0.72173	2.99483e-05		0.72173	3.75347e-05
0.724624	2.54493e-05		0.724624	2.7864e-05		0.724624	1.37576e-05		0.724624	2.2514e-05		0.724624	2.9775e-05		0.724624	3.7312e-05
0.727518	2.50148e-05		0.727518	2.74411e-05		0.727518	1.37394e-05		0.727518	2.2402e-05		0.727518	2.96009e-05		0.727518	3.70872e-05
0.730412	2.46032e-05		0.730412	2.70411e-05		0.730412	1.37196e-05		0.730412	2.22896e-05		0.730412	2.94257e-05		0.730412	3.68597e-05
0.733305	2.42117e-05		0.733305	2.66609e-05		0.733305	1.36982e-05		0.733305	2.21766e-05		0.733305	2.92493e-05		0.733305	3.66285e-05
0.736199	2.38374e-05		0.736199	2.62976e-05		0.736199	1.3675e-05		0.736199	2.20629e-05		0.736199	2.90714e-05		0.736199	3.63931e-05
0.739093	2.34793e-05		0.739093	2.59487e-05		0.739093	1.36498e-05		0.739093	2.19485e-05		0.739093	2.88919e-05		0.739093	3.61527e-05
0.741987	2.31362e-05		0.741987	2.56133e-05		0.741987	1.36226e-05		0.741987	2.1833e-05		0.741987	2.87104e-05		0.741987	3.59067e-05
0.744881	2.28074e-05		0.744881	2.52909e-05		0.744881	1.3593e-05		0.744881	2.17165e-05		0.744881	2.85267e-05		0.744881	3.56543e-05
0.747775	2.24917e-05		0.747775	2.49795e-05		0.747775	1.35609e-05		0.747775	2.15985e-05		0.747775	2.83406e-05		0.747775	3.53948e-05
0.750669	2.21882e-05		0.750669	2.46766e-05		0.750669	1.3526e-05		0.750669	2.1479e-05		0.750669	2.81516e-05		0.750669	3.51274e-05
0.753563	2.18959e-05		0.753563	2.43797e-05		0.753563	1.34881e-05		0.753563	2.13578e-05		0.753563	2.79586e-05		0.753563	3.48516e-05
0.756457	2.1614e-05		0.756457	2.40863e-05		0.756457	1.34468e-05		0.756457	2.12345e-05		0.756457	2.77608e-05		0.756457	3.45664e-05
0.75935	2.13398e-05		0.75935	2.37937e-05		0.75935	1.34018e-05		0.75935	2.11084e-05		0.75935	2.75578e-05		0.75935	3.42713e-05
0.762244	2.10709e-05		0.762244	2.34994e-05		0.762244	1.33527e-05		0.762244	2.09784e-05		0.762244	2.73492e-05		0.762244	3.39653e-05
0.765138	2.08066e-05		0.765138	2.32004e-05		0.765138	1.3299e-05		0.765138	2.08442e-05		0.765138	2.71346e-05		0.765138	3.36477e-05
0.768032	2.05461e-05		0.768032	2.28989e-05		0.768032	1.32413e-05		0.768032	2.07052e-05		0.768032	2.69134e-05		0.768032	3.33179e-05
0.770926	2.02887e-05		0.770926	2.25979e-05		0.770926	1.31803e-05		0.770926	2.05612e-05		0.770926	2.66853e-05		0.770926	3.29757e-05
0.77382	2.00336e-05		0.77382	2.22957e-05		0.77382	1.31163e-05		0.77382	2.04119e-05		0.77382	2.64498e-05		0.77382	3.26207e-05
0.776714	1.97793e-05		0.776714	2.19907e-05		0.776714	1.30491e-05		0.776714	2.0257e-05		0.776714	2.62069e-05		0.776714	3.22529e-05
0.779608	1.95242e-05		0.779608	2.16816e-05		0.779608	1.29786e-05		0.779608	2.00964e-05		0.779608	2.59562e-05		0.779608	3.18727e-05
0.782502	1.92683e-05		0.782502	2.13694e-05		0.782502	1.29043e-05		0.782502	1.99299e-05		0.782502	2.56978e-05		0.782502	3.14806e-05
0.785396	1.90118e-05		0.785396	2.10556e-05		0.785396	1.28263e-05		0.785396	1.97576e-05		0.785396	2.54317e-05		0.785396	3.10771e-05
0.788289	1.87555e-05		0.788289	2.07406e-05		0.788289	1.27443e-05		0.788289	1.95797e-05		0.788289	2.51584e-05		0.788289	3.06634e-05
0.791183	1.84994e-05		0.791183	2.04284e-05		0.791183	1.2658e-05		0.791183	1.93961e-05		0.791183	2.4878e-05		0.791183	3.02405e-05
0.794077	1.82435e-05		0.794077	2.01235e-05		0.794077	1.25671e-05		0.794077	1.92072e-05		0.794077	2.45912e-05		0.794077	2.98099e-05
0.796971	1.79885e-05		0.796971	1.98272e-05		0.796971	1.24712e-05		0.796971	1.90131e-05		0.796971	2.42983e-05		0.796971	2.93732e-05
0.799865	1.77351e-05		0.799865	1.95398e-05		0.799865	1.23698e-05		0.799865	1.88139e-05		0.799865	2.4e-05		0.799865	2.89314e-05
0.799865	1.77351e-05		0.799865	1.95398e-05		0.799865	1.23698e-05		0.799865	1.88139e-05		0.799865	2.4e-05		0.799865	2.89314e-05
0.802759	1.74833e-05		0.802759	1.92548e-05		0.802759	1.22632e-05		0.802759	1.8609e-05		0.802759	2.36951e-05		0.802759	2.84824e-05
0.805653	1.72328e-05		0.805653	1.89655e-05		0.805653	1.2152e-05		0.805653	1.83978e-05		0.805653	2.33826e-05		0.805653	2.80234e-05
0.808547	1.69845e-05		0.808547	1.86727e-05		0.808547	1.20356e-05		0.808547	1.81803e-05		0.808547	2.30628e-05		0.808547	2.75547e-05
0.811441	1.67389e-05		0.811441	1.83767e-05		0.811441	1.19139e-05		0.811441	1.79565e-05		0.811441	2.2736e-05		0.811441	2.70762e-05
0.814334	1.6496e-05		0.814334	1.80789e-05		0.814334	1.17867e-05		0.814334	1.77265e-05		0.814334	2.24023e-05		0.814334	2.65879e-05
0.817228	1.62561e-05		0.817228	1.77804e-05		0.817228	1.16541e-05		0.817228	1.74904e-05		0.817228	2.20619e-05		0.817228	2.6091e-05
0.820122	1.60189e-05		0.820122	1.74803e-05		0.820122	1.15158e-05		0.820122	1.72481e-05		0.820122	2.17153e-05		0.820122	2.5587e-05
0.823016	1.57843e-05		0.823016	1.71776e-05		0.823016	1.13705e-05		0.823016	1.69998e-05		0.823016	2.13629e-05		0.823016	2.50752e-05
0.82591	1.55519e-05		0.82591	1.68713e-05		0.82591	1.1218e-05		0.82591	1.67456e-05		0.82591	2.1005e-05		0.82591	2.45551e-05
0.828804	1.53214e-05		0.828804	1.65602e-05		0.828804	1.10584e-05		0.828804	1.64857e-05		0.828804	2.06419e-05		0.828804	2.40262e-05
0.831698	1.50926e-05		0.831698	1.62435e-05		0.831698	1.08927e-05		0.831698	1.62203e-05		0.831698	2.0274e-05		0.831698	2.34877e-05
0.834592	1.48651e-05		0.834592	1.59228e-05		0.834592	1.07215e-05		0.834592	1.59495e-05		0.834592	1.99018e-05		0.834592	2.29422e-05
0.837486	1.4639e-05		0.837486	1.55998e-05		0.837486	1.05458e-05		0.837486	1.56734e-05		0.837486	1.95259e-05		0.837486	2.23918e-05
0.840379	1.44146e-05		0.840379	1.52741e-05		0.840379	1.03667e-05		0.840379	1.53925e-05		0.840379	1.91469e-05		0.840379	2.18367e-05
0.843273	1.41918e-05		0.843273	1.49452e-05		0.843273	1.01856e-05		0.843273	1.51076e-05		0.843273	1.87656e-05		0.843273	2.12765e-05
0.846167	1.39707e-05		0.846167	1.46127e-05		0.846167	1.00041e-05		0.846167	1.48196e-05		0.846167	1.83831e-05		0.846167	2.07109e-05
0.849061	1.37517e-05		0.849061	1.42762e-05		0.849061	9.822e-06		0.849061	1.45297e-05		0.849061	1.80005e-05		0.849061	2.01448e-05
0.851955	1.35351e-05		0.851955	1.39374e-05		0.851955	9.63856e-06		0.851955	1.42393e-05		0.851955	1.76195e-05		0.851955	1.95845e-05
0.854849	1.33215e-05		0.854849	1.36015e-05		0.854849	9.45515e-06		0.854849	1.39513e-05		0.854849	1.72421e-05		0.854849	1.90321e-05
0.857743	1.31117e-05		0.857743	1.32731e-05		0.857743	9.27351e-06		0.857743	1.36683e-05		0.857743	1.68716e-05		0.857743	1.84894e-05
0.860637	1.29084e-05		0.860637	1.29538e-05		0.860637	9.09578e-06		0.860637	1.33929e-05		0.860637	1.65115e-05		0.860637	1.79592e-05
0.863531	1.27157e-05		0.863531	1.26465e-05		0.863531	8.92458e-06		0.863531	1.31283e-05		0.863531	1.61654e-05		0.863531	1.74474e-05
0.866424	1.25362e-05		0.866424	1.23553e-05		0.866424	8.76336e-06		0.866424	1.28791e-05		0.866424	1.58386e-05		0.866424	1.69674e-05
0.869318	1.23747e-05		0.869318	1.2087e-05		0.869318	8.61688e-06		0.869318	1.26523e-05		0.869318	1.55392e-05		0.869318	1.65347e-05
0.872212	1.22383e-05		0.872212	1.18529e-05		0.872212	8.49166e-06		0.872212	1.24579e-05		0.872212	1.5281e-05		0.872212	1.6167e-05
0.875106	1.21382e-05		0.875106	1.16739e-05		0.875106	8.39866e-06		0.875106	1.23126e-05		0.875106	1.50886e-05		0.875106	1.58955e-05
0.878	1.20996e-05		0.878	1.16027e-05		0.878	8.36081e-06		0.878	1.2255e-05		0.878	1.50127e-05		0.878	1.57883e-05

## Sheet: oh distribution 
SN 0			SN 0.2			SN 0.4			SN 0.6			SN 0.8			SN 1
Axial distance	oh mass fraction		Axial distance	oh mass fraction		Axial distance	oh mass fraction		Axial distance	oh mass fraction		Axial distance	oh mass fraction		Axial distance	oh mass fraction
0.00115113	4.63508e-05		0.00115113	4.42349e-05		0.00115113	3.01594e-05		0.00115113	6.49304e-05		0.00115113	7.72645e-05		0.00115113	8.57331e-05
0.00404502	4.88729e-05		0.00404502	5.03571e-05		0.00404502	0.000115675		0.00404502	0.000131691		0.00404502	0.000115808		0.00404502	0.000128472
0.00693891	0.000117312		0.00693891	0.000125699		0.00693891	0.000245228		0.00693891	0.000278267		0.00693891	0.00025723		0.00693891	0.00026946
0.0098328	0.000208184		0.0098328	0.000221205		0.0098328	0.000349128		0.0098328	0.000399118		0.0098328	0.000384813		0.0098328	0.00037486
0.0127267	0.000270044		0.0127267	0.000288852		0.0127267	0.000427887		0.0127267	0.000472605		0.0127267	0.000394253		0.0127267	0.0003511
0.0156206	0.000291134		0.0156206	0.000304849		0.0156206	0.000408087		0.0156206	0.00035555		0.0156206	0.000294107		0.0156206	0.00024159
0.0185145	0.000285443		0.0185145	0.000308505		0.0185145	0.000266071		0.0185145	0.000114762		0.0185145	0.000113364		0.0185145	9.08243e-05
0.0214084	0.000256709		0.0214084	0.000267183		0.0214084	0.000147089		0.0214084	1.31948e-05		0.0214084	1.35579e-16		0.0214084	0
0.0243023	0.000210028		0.0243023	0.000191302		0.0243023	8.97432e-05		0.0243023	2.33729e-06		0.0243023	1.10692e-07		0.0243023	0
0.0271961	0.000168775		0.0271961	0.000159474		0.0271961	6.58296e-05		0.0271961	7.04204e-06		0.0271961	2.573e-06		0.0271961	2.37293e-06
0.03009	0.000139453		0.03009	0.000136691		0.03009	5.61523e-05		0.03009	8.97224e-06		0.03009	4.96891e-06		0.03009	4.59165e-06
0.0329839	0.000115696		0.0329839	0.00011322		0.0329839	5.00941e-05		0.0329839	9.05189e-06		0.0329839	3.99517e-06		0.0329839	4.03159e-06
0.0358778	9.08687e-05		0.0358778	9.5548e-05		0.0358778	4.70935e-05		0.0358778	1.7661e-05		0.0358778	8.52176e-06		0.0358778	8.04269e-06
0.0387717	6.38761e-05		0.0387717	7.76455e-05		0.0387717	4.90658e-05		0.0387717	1.97144e-05		0.0387717	1.06256e-05		0.0387717	8.74354e-06
0.0416656	4.5554e-05		0.0416656	5.50065e-05		0.0416656	5.10582e-05		0.0416656	1.12378e-05		0.0416656	1.08419e-05		0.0416656	3.48078e-06
0.0445595	4.12182e-05		0.0445595	3.70256e-05		0.0445595	4.89057e-05		0.0445595	1.25823e-05		0.0445595	1.57981e-05		0.0445595	4.56756e-06
0.0474534	4.76855e-05		0.0474534	3.44733e-05		0.0474534	4.58983e-05		0.0474534	2.12177e-05		0.0474534	1.92116e-05		0.0474534	7.6408e-06
0.0503473	5.8446e-05		0.0503473	4.59166e-05		0.0503473	4.73096e-05		0.0503473	2.61901e-05		0.0503473	2.17584e-05		0.0503473	1.1405e-05
0.0532412	7.1323e-05		0.0532412	6.22146e-05		0.0532412	6.62877e-05		0.0532412	4.60739e-05		0.0532412	3.03903e-05		0.0532412	1.71046e-05
0.056135	8.40902e-05		0.056135	7.79837e-05		0.056135	6.97887e-05		0.056135	0.000103341		0.056135	7.07846e-05		0.056135	1.80235e-05
0.0590289	9.23366e-05		0.0590289	9.04459e-05		0.0590289	4.74746e-05		0.0590289	0.000157129		0.0590289	0.000120102		0.0590289	2.6915e-05
0.0619228	9.73368e-05		0.0619228	9.93293e-05		0.0619228	3.33369e-05		0.0619228	0.000210454		0.0619228	0.000160998		0.0619228	6.52561e-05
0.0648167	0.000101299		0.0648167	0.000105397		0.0648167	2.72997e-05		0.0648167	0.000257146		0.0648167	0.000187984		0.0648167	0.000107383
0.0677106	0.000103364		0.0677106	0.000108949		0.0677106	2.94744e-05		0.0677106	0.000233784		0.0677106	0.000162276		0.0677106	0.000141532
0.0706045	0.000104444		0.0706045	0.000110793		0.0706045	4.71452e-05		0.0706045	0.000175169		0.0706045	0.000113353		0.0706045	0.000168738
0.0734984	0.000105192		0.0734984	0.000111669		0.0734984	8.82922e-05		0.0734984	0.000131578		0.0734984	8.05891e-05		0.0734984	0.000149005
0.0763923	0.000105027		0.0763923	0.00011182		0.0763923	0.000148886		0.0763923	0.000100577		0.0763923	5.92576e-05		0.0763923	0.000103111
0.0792862	0.000104426		0.0792862	0.000111306		0.0792862	0.00022699		0.0792862	7.7907e-05		0.0792862	4.46358e-05		0.0792862	7.18122e-05
0.0821801	0.000103656		0.0821801	0.000110696		0.0821801	0.00028845		0.0821801	6.09415e-05		0.0821801	3.40995e-05		0.0821801	5.13144e-05
0.085074	0.000103187		0.085074	0.000109874		0.085074	0.000346595		0.085074	4.80057e-05		0.085074	2.62491e-05		0.085074	3.75201e-05
0.085074	0.000103187		0.085074	0.000109874		0.085074	0.000346595		0.085074	4.80057e-05		0.085074	2.62491e-05		0.085074	3.75201e-05
0.0879678	0.000102833		0.0879678	0.000108737		0.0879678	0.000421674		0.0879678	3.79919e-05		0.0879678	2.03212e-05		0.0879678	2.79031e-05
0.0908617	0.000102672		0.0908617	0.000107294		0.0908617	0.000467232		0.0908617	3.01762e-05		0.0908617	1.5794e-05		0.0908617	2.10098e-05
0.0937556	0.000102761		0.0937556	0.000105633		0.0937556	0.000443984		0.0937556	2.40279e-05		0.0937556	1.22991e-05		0.0937556	1.59813e-05
0.0966495	0.000103046		0.0966495	0.000103707		0.0966495	0.00036797		0.0966495	1.91605e-05		0.0966495	9.60019e-06		0.0966495	1.22675e-05
0.0995434	0.000103363		0.0995434	0.00010134		0.0995434	0.000290046		0.0995434	1.53061e-05		0.0995434	7.5218e-06		0.0995434	9.49485e-06
0.102437	0.00010371		0.102437	9.849e-05		0.102437	0.00022487		0.102437	1.22515e-05		0.102437	5.91527e-06		0.102437	7.40879e-06
0.105331	0.000104154		0.105331	9.51928e-05		0.105331	0.000173916		0.105331	9.82681e-06		0.105331	4.68291e-06		0.105331	5.83595e-06
0.108225	0.00010434		0.108225	9.20644e-05		0.108225	0.000134437		0.108225	7.91339e-06		0.108225	3.73324e-06		0.108225	4.6599e-06
0.111119	0.000104589		0.111119	8.86101e-05		0.111119	0.000104029		0.111119	6.39924e-06		0.111119	2.99127e-06		0.111119	3.78958e-06
0.114013	0.000104737		0.114013	8.43381e-05		0.114013	8.05571e-05		0.114013	5.18165e-06		0.114013	2.41661e-06		0.114013	3.14199e-06
0.116907	0.000104378		0.116907	7.9921e-05		0.116907	6.24282e-05		0.116907	4.202e-06		0.116907	1.97549e-06		0.116907	2.65411e-06
0.119801	0.000103767		0.119801	7.53144e-05		0.119801	4.83385e-05		0.119801	3.41736e-06		0.119801	1.64008e-06		0.119801	2.29032e-06
0.122695	0.000102815		0.122695	7.09397e-05		0.122695	3.73346e-05		0.122695	2.79428e-06		0.122695	1.3876e-06		0.122695	2.02169e-06
0.125588	0.000101448		0.125588	6.69342e-05		0.125588	2.87067e-05		0.125588	2.30443e-06		0.125588	1.19955e-06		0.125588	1.82486e-06
0.128482	0.000100064		0.128482	6.22871e-05		0.128482	2.19496e-05		0.128482	1.92368e-06		0.128482	1.06107e-06		0.128482	1.68166e-06
0.131376	9.86459e-05		0.131376	6.28853e-05		0.131376	1.66517e-05		0.131376	1.63155e-06		0.131376	9.60414e-07		0.131376	1.57828e-06
0.13427	9.69839e-05		0.13427	6.25701e-05		0.13427	1.24927e-05		0.13427	1.40967e-06		0.13427	8.88443e-07		0.13427	1.50431e-06
0.137164	9.54381e-05		0.137164	5.65427e-05		0.137164	9.24172e-06		0.137164	1.24219e-06		0.137164	8.38084e-07		0.137164	1.45193e-06
0.140058	9.40187e-05		0.140058	5.2881e-05		0.140058	6.71213e-06		0.140058	1.11683e-06		0.140058	8.03955e-07		0.140058	1.41536e-06
0.142952	9.25828e-05		0.142952	5.11427e-05		0.142952	4.75585e-06		0.142952	1.02396e-06		0.142952	7.81389e-07		0.142952	1.39036e-06
0.145846	9.11588e-05		0.145846	5.06755e-05		0.145846	3.26419e-06		0.145846	9.55938e-07		0.145846	7.66787e-07		0.145846	1.37382e-06
0.14874	8.98556e-05		0.14874	5.07742e-05		0.14874	2.14791e-06		0.14874	9.06821e-07		0.14874	7.58003e-07		0.14874	1.36343e-06
0.151633	8.85959e-05		0.151633	5.08009e-05		0.151633	1.33171e-06		0.151633	8.72047e-07		0.151633	7.53434e-07		0.151633	1.35731e-06
0.154527	8.75096e-05		0.154527	5.09441e-05		0.154527	7.53448e-07		0.154527	8.48169e-07		0.154527	7.51891e-07		0.154527	1.35424e-06
0.157421	8.59903e-05		0.157421	5.12445e-05		0.157421	3.67411e-07		0.157421	8.3258e-07		0.157421	7.52495e-07		0.157421	1.35372e-06
0.160315	8.54097e-05		0.160315	5.18704e-05		0.160315	1.34728e-07		0.160315	8.23283e-07		0.160315	7.54547e-07		0.160315	1.35528e-06
0.163209	8.6418e-05		0.163209	5.26894e-05		0.163209	2.62441e-08		0.163209	8.18654e-07		0.163209	7.57422e-07		0.163209	1.35779e-06
0.166103	8.57416e-05		0.166103	5.34099e-05		0.166103	2.77556e-17		0.166103	8.17349e-07		0.166103	7.60709e-07		0.166103	1.36039e-06
0.166103	8.57416e-05		0.166103	5.34099e-05		0.166103	2.77556e-17		0.166103	8.17349e-07		0.166103	7.60709e-07		0.166103	1.36039e-06
0.168997	8.34392e-05		0.168997	5.41942e-05		0.168997	2.77556e-17		0.168997	8.17835e-07		0.168997	7.63921e-07		0.168997	1.36274e-06
0.171891	8.20104e-05		0.171891	5.51572e-05		0.171891	0		0.171891	8.19175e-07		0.171891	7.66802e-07		0.171891	1.36569e-06
0.174785	8.13618e-05		0.174785	5.62574e-05		0.174785	0		0.174785	8.21139e-07		0.174785	7.68862e-07		0.174785	1.37032e-06
0.177678	8.08498e-05		0.177678	5.71875e-05		0.177678	6.93889e-17		0.177678	8.22905e-07		0.177678	7.6952e-07		0.177678	1.37337e-06
0.180572	8.05539e-05		0.180572	5.89426e-05		0.180572	6.93889e-17		0.180572	8.23701e-07		0.180572	7.68895e-07		0.180572	1.37354e-06
0.183466	7.98879e-05		0.183466	6.03287e-05		0.183466	5.55112e-17		0.183466	8.23834e-07		0.183466	7.67117e-07		0.183466	1.37453e-06
0.18636	7.98277e-05		0.18636	6.13617e-05		0.18636	8.32667e-17		0.18636	8.24747e-07		0.18636	7.64785e-07		0.18636	1.37717e-06
0.189254	8.05775e-05		0.189254	6.25073e-05		0.189254	2.77556e-17		0.189254	8.27525e-07		0.189254	7.6298e-07		0.189254	1.38e-06
0.192148	8.08757e-05		0.192148	6.30408e-05		0.192148	5.55112e-17		0.192148	8.30875e-07		0.192148	7.61887e-07		0.192148	1.38284e-06
0.195042	8.07896e-05		0.195042	6.41138e-05		0.195042	2.35922e-16		0.195042	8.32906e-07		0.195042	7.59197e-07		0.195042	1.38614e-06
0.197936	8.05087e-05		0.197936	6.55387e-05		0.197936	1.80411e-16		0.197936	8.33393e-07		0.197936	7.5308e-07		0.197936	1.38969e-06
0.20083	8.01265e-05		0.20083	6.71661e-05		0.20083	2.77556e-17		0.20083	8.32619e-07		0.20083	7.45714e-07		0.20083	1.39335e-06
0.203723	7.96654e-05		0.203723	6.86336e-05		0.203723	1.249e-16		0.203723	8.30888e-07		0.203723	7.39271e-07		0.203723	1.3971e-06
0.206617	7.92152e-05		0.206617	7.03235e-05		0.206617	9.71445e-17		0.206617	8.29885e-07		0.206617	7.33519e-07		0.206617	1.40097e-06
0.209511	7.87166e-05		0.209511	7.22815e-05		0.209511	0		0.209511	8.31995e-07		0.209511	7.27741e-07		0.209511	1.4053e-06
0.212405	7.83102e-05		0.212405	7.40031e-05		0.212405	0		0.212405	8.38068e-07		0.212405	7.2136e-07		0.212405	1.41068e-06
0.215299	7.74571e-05		0.215299	7.49908e-05		0.215299	2.77556e-17		0.215299	8.44598e-07		0.215299	7.14109e-07		0.215299	1.41764e-06
0.215299	7.74571e-05		0.215299	7.49908e-05		0.215299	2.77556e-17		0.215299	8.44598e-07		0.215299	7.14109e-07		0.215299	1.41764e-06
0.218193	7.62833e-05		0.218193	7.55847e-05		0.218193	2.77556e-17		0.218193	8.45977e-07		0.218193	7.06391e-07		0.218193	1.42504e-06
0.221087	7.56433e-05		0.221087	7.66652e-05		0.221087	0		0.221087	8.40475e-07		0.221087	6.98683e-07		0.221087	1.43119e-06
0.223981	7.53628e-05		0.223981	7.80167e-05		0.223981	8.32667e-17		0.223981	8.32405e-07		0.223981	6.91071e-07		0.223981	1.43567e-06
0.226875	7.53063e-05		0.226875	7.93705e-05		0.226875	8.32667e-17		0.226875	8.26556e-07		0.226875	6.83578e-07		0.226875	1.43843e-06
0.229768	7.53667e-05		0.229768	8.04796e-05		0.229768	0		0.229768	8.23397e-07		0.229768	6.76598e-07		0.229768	1.43962e-06
0.232662	7.55919e-05		0.232662	8.11272e-05		0.232662	0		0.232662	8.22257e-07		0.232662	6.70429e-07		0.232662	1.43939e-06
0.235556	7.55916e-05		0.235556	8.17661e-05		0.235556	1.38778e-17		0.235556	8.22286e-07		0.235556	6.64918e-07		0.235556	1.43788e-06
0.23845	7.60955e-05		0.23845	8.32191e-05		0.23845	1.38778e-17		0.23845	8.22474e-07		0.23845	6.60258e-07		0.23845	1.43522e-06
0.241344	7.72375e-05		0.241344	8.53104e-05		0.241344	0		0.241344	8.22545e-07		0.241344	6.56597e-07		0.241344	1.43152e-06
0.244238	7.80009e-05		0.244238	8.72455e-05		0.244238	2.77556e-17		0.244238	8.22713e-07		0.244238	6.53736e-07		0.244238	1.42686e-06
0.247132	7.86186e-05		0.247132	8.96953e-05		0.247132	2.77556e-17		0.247132	8.23156e-07		0.247132	6.51467e-07		0.247132	1.42128e-06
0.250026	7.93409e-05		0.250026	9.16183e-05		0.250026	0		0.250026	8.23899e-07		0.250026	6.49649e-07		0.250026	1.41499e-06
0.25292	8.00811e-05		0.25292	9.25996e-05		0.25292	0		0.25292	8.24906e-07		0.25292	6.48193e-07		0.25292	1.4082e-06
0.255814	8.08461e-05		0.255814	9.57057e-05		0.255814	0		0.255814	8.2611e-07		0.255814	6.47041e-07		0.255814	1.40096e-06
0.258707	8.15253e-05		0.258707	9.89964e-05		0.258707	1.38778e-17		0.258707	8.27403e-07		0.258707	6.46149e-07		0.258707	1.39334e-06
0.261601	8.13521e-05		0.261601	0.000101253		0.261601	4.16334e-17		0.261601	8.28665e-07		0.261601	6.45489e-07		0.261601	1.38545e-06
0.264495	8.074e-05		0.264495	0.000105159		0.264495	2.77556e-17		0.264495	8.29928e-07		0.264495	6.45058e-07		0.264495	1.37735e-06
0.267389	8.06773e-05		0.267389	0.000110559		0.267389	0		0.267389	8.31996e-07		0.267389	6.44864e-07		0.267389	1.36903e-06
0.270283	8.13165e-05		0.270283	0.000116764		0.270283	0		0.270283	8.35367e-07		0.270283	6.44914e-07		0.270283	1.36049e-06
0.273177	8.26976e-05		0.273177	0.000124441		0.273177	8.32667e-17		0.273177	8.39581e-07		0.273177	6.45214e-07		0.273177	1.3517e-06
0.276071	8.47807e-05		0.276071	0.000133388		0.276071	9.71445e-17		0.276071	8.4426e-07		0.276071	6.4577e-07		0.276071	1.34266e-06
0.278965	8.69428e-05		0.278965	0.000140648		0.278965	1.38778e-17		0.278965	8.49162e-07		0.278965	6.46601e-07		0.278965	1.33336e-06
0.281859	8.90793e-05		0.281859	0.000145953		0.281859	0		0.281859	8.54149e-07		0.281859	6.47739e-07		0.281859	1.32379e-06
0.284752	9.12041e-05		0.284752	0.00015156		0.284752	0		0.284752	8.59156e-07		0.284752	6.49254e-07		0.284752	1.31393e-06
0.287646	9.32318e-05		0.287646	0.00015669		0.287646	1.38778e-17		0.287646	8.64109e-07		0.287646	6.51266e-07		0.287646	1.30379e-06
0.29054	9.52196e-05		0.29054	0.000160837		0.29054	1.38778e-17		0.29054	8.68858e-07		0.29054	6.53854e-07		0.29054	1.29335e-06
0.293434	9.81232e-05		0.293434	0.000162325		0.293434	0		0.293434	8.73246e-07		0.293434	6.56439e-07		0.293434	1.28259e-06
0.296328	9.93791e-05		0.296328	0.000163416		0.296328	0		0.296328	8.77241e-07		0.296328	6.58465e-07		0.296328	1.27148e-06
0.299222	9.91441e-05		0.299222	0.000167759		0.299222	8.32667e-17		0.299222	8.80952e-07		0.299222	6.59966e-07		0.299222	1.26008e-06
0.302116	0.000101932		0.302116	0.000172715		0.302116	8.32667e-17		0.302116	8.84442e-07		0.302116	6.60944e-07		0.302116	1.24843e-06
0.30501	0.000107059		0.30501	0.000177646		0.30501	2.77556e-17		0.30501	8.8762e-07		0.30501	6.6138e-07		0.30501	1.2365e-06
0.307904	0.000112831		0.307904	0.000184028		0.307904	2.77556e-17		0.307904	8.90204e-07		0.307904	6.61243e-07		0.307904	1.22427e-06
0.310797	0.000118535		0.310797	0.000189678		0.310797	2.77556e-17		0.310797	8.9181e-07		0.310797	6.60496e-07		0.310797	1.21172e-06
0.313691	0.000123639		0.313691	0.000194438		0.313691	4.16334e-17		0.313691	8.92818e-07		0.313691	6.59096e-07		0.313691	1.19882e-06
0.313691	0.000123639		0.313691	0.000194438		0.313691	4.16334e-17		0.313691	8.92818e-07		0.313691	6.59096e-07		0.313691	1.19882e-06
0.316585	0.000127033		0.316585	0.000202783		0.316585	6.93889e-17		0.316585	8.94057e-07		0.316585	6.575e-07		0.316585	1.18614e-06
0.319479	0.000127745		0.319479	0.000215552		0.319479	5.55112e-17		0.319479	8.96092e-07		0.319479	6.56146e-07		0.319479	1.17419e-06
0.322373	0.000127197		0.322373	0.000230476		0.322373	1.38778e-17		0.322373	8.99205e-07		0.322373	6.54938e-07		0.322373	1.16286e-06
0.325267	0.000127155		0.325267	0.000244842		0.325267	4.16334e-17		0.325267	9.03379e-07		0.325267	6.53781e-07		0.325267	1.15201e-06
0.328161	0.000129139		0.328161	0.000256097		0.328161	2.77556e-17		0.328161	9.0868e-07		0.328161	6.52598e-07		0.328161	1.1415e-06
0.331055	0.000134331		0.331055	0.000264724		0.331055	1.38778e-17		0.331055	9.14897e-07		0.331055	6.5133e-07		0.331055	1.13122e-06
0.333949	0.000143793		0.333949	0.000273664		0.333949	8.32667e-17		0.333949	9.21309e-07		0.333949	6.49922e-07		0.333949	1.12103e-06
0.336842	0.00015132		0.336842	0.000289282		0.336842	9.71445e-17		0.336842	9.27464e-07		0.336842	6.48324e-07		0.336842	1.11083e-06
0.339736	0.000156886		0.339736	0.000307164		0.339736	2.77556e-17		0.339736	9.34608e-07		0.339736	6.46482e-07		0.339736	1.10051e-06
0.34263	0.000160664		0.34263	0.000328819		0.34263	4.16334e-17		0.34263	9.44102e-07		0.34263	6.44336e-07		0.34263	1.09064e-06
0.345524	0.000161583		0.345524	0.000363766		0.345524	4.16334e-17		0.345524	9.54461e-07		0.345524	6.41818e-07		0.345524	1.08178e-06
0.348418	0.000161399		0.348418	0.000401034		0.348418	0		0.348418	9.64077e-07		0.348418	6.39369e-07		0.348418	1.07386e-06
0.351312	0.000170344		0.351312	0.000433746		0.351312	5.55112e-17		0.351312	9.73276e-07		0.351312	6.37441e-07		0.351312	1.06681e-06
0.354206	0.000191501		0.354206	0.000465182		0.354206	9.71445e-17		0.354206	9.82576e-07		0.354206	6.36011e-07		0.354206	1.06061e-06
0.3571	0.000214245		0.3571	0.000496454		0.3571	4.16334e-17		0.3571	9.92128e-07		0.3571	6.3508e-07		0.3571	1.05521e-06
0.359994	0.000239571		0.359994	0.000528851		0.359994	0		0.359994	1.00181e-06		0.359994	6.34639e-07		0.359994	1.05061e-06
0.362887	0.000267385		0.362887	0.000562099		0.362887	1.38778e-17		0.362887	1.01148e-06		0.362887	6.34666e-07		0.362887	1.04682e-06
0.365781	0.000295493		0.365781	0.000602364		0.365781	1.38778e-17		0.365781	1.02106e-06		0.365781	6.3514e-07		0.365781	1.04381e-06
0.368675	0.000321943		0.368675	0.000647112		0.368675	0		0.368675	1.03041e-06		0.368675	6.3607e-07		0.368675	1.04151e-06
0.371569	0.000352105		0.371569	0.000692646		0.371569	0		0.371569	1.0393e-06		0.371569	6.37467e-07		0.371569	1.03984e-06
0.374463	0.000383348		0.374463	0.000751733		0.374463	2.77556e-17		0.374463	1.04742e-06		0.374463	6.39327e-07		0.374463	1.0388e-06
0.377357	0.000408509		0.377357	0.000818566		0.377357	2.77556e-17		0.377357	1.05462e-06		0.377357	6.41616e-07		0.377357	1.03852e-06
0.380251	0.000431972		0.380251	0.000888684		0.380251	4.16334e-17		0.380251	1.06082e-06		0.380251	6.44274e-07		0.380251	1.03899e-06
0.383145	0.000459956		0.383145	0.000967505		0.383145	8.32667e-17		0.383145	1.06688e-06		0.383145	6.47249e-07		0.383145	1.04014e-06
0.386039	0.000490394		0.386039	0.00104773		0.386039	4.16334e-17		0.386039	1.07371e-06		0.386039	6.50573e-07		0.386039	1.04183e-06
0.388932	0.000519549		0.388932	0.00112238		0.388932	0		0.388932	1.08118e-06		0.388932	6.54285e-07		0.388932	1.04403e-06
0.391826	0.000547981		0.391826	0.00118607		0.391826	1.38778e-17		0.391826	1.08918e-06		0.391826	6.58353e-07		0.391826	1.04698e-06
0.39472	0.00058137		0.39472	0.00123229		0.39472	4.16334e-17		0.39472	1.09754e-06		0.39472	6.6273e-07		0.39472	1.05049e-06
0.397614	0.000619751		0.397614	0.00125971		0.397614	2.77556e-17		0.397614	1.10604e-06		0.397614	6.67102e-07		0.397614	1.05421e-06
0.400508	0.000659656		0.400508	0.00127145		0.400508	6.93889e-17		0.400508	1.11442e-06		0.400508	6.71106e-07		0.400508	1.05812e-06
0.403402	0.000705015		0.403402	0.00126532		0.403402	9.71445e-17		0.403402	1.12245e-06		0.403402	6.74794e-07		0.403402	1.06217e-06
0.403402	0.000705015		0.403402	0.00126532		0.403402	9.71445e-17		0.403402	1.12245e-06		0.403402	6.74794e-07		0.403402	1.06217e-06
0.406296	0.000757788		0.406296	0.00124264		0.406296	2.77556e-17		0.406296	1.13049e-06		0.406296	6.78419e-07		0.406296	1.06599e-06
0.40919	0.000817128		0.40919	0.00120962		0.40919	0		0.40919	1.13892e-06		0.40919	6.81932e-07		0.40919	1.06923e-06
0.412084	0.000878078		0.412084	0.00116915		0.412084	4.16334e-17		0.412084	1.14767e-06		0.412084	6.85186e-07		0.412084	1.07176e-06
0.414977	0.000933755		0.414977	0.00112306		0.414977	4.16334e-17		0.414977	1.15662e-06		0.414977	6.88233e-07		0.414977	1.07346e-06
0.417871	0.000977735		0.417871	0.00107439		0.417871	8.32667e-17		0.417871	1.16568e-06		0.417871	6.91081e-07		0.417871	1.07424e-06
0.420765	0.00100725		0.420765	0.001023		0.420765	9.71445e-17		0.420765	1.1748e-06		0.420765	6.93695e-07		0.420765	1.07446e-06
0.423659	0.00102194		0.423659	0.00096866		0.423659	1.38778e-17		0.423659	1.18389e-06		0.423659	6.96041e-07		0.423659	1.07453e-06
0.426553	0.00102228		0.426553	0.000912575		0.426553	0		0.426553	1.19291e-06		0.426553	6.98097e-07		0.426553	1.07441e-06
0.429447	0.00100933		0.429447	0.000855993		0.429447	2.77556e-17		0.429447	1.20182e-06		0.429447	6.99847e-07		0.429447	1.07409e-06
0.432341	0.000986438		0.432341	0.00080114		0.432341	5.55112e-17		0.432341	1.21058e-06		0.432341	7.01285e-07		0.432341	1.07357e-06
0.435235	0.00095533		0.435235	0.000747909		0.435235	4.16334e-17		0.435235	1.21915e-06		0.435235	7.02425e-07		0.435235	1.07285e-06
0.438129	0.000916384		0.438129	0.000696499		0.438129	2.77556e-17		0.438129	1.22749e-06		0.438129	7.03272e-07		0.438129	1.07194e-06
0.441023	0.000873912		0.441023	0.0006472		0.441023	1.38778e-17		0.441023	1.23552e-06		0.441023	7.03818e-07		0.441023	1.07083e-06
0.443916	0.000828433		0.443916	0.000600555		0.443916	0		0.443916	1.24318e-06		0.443916	7.04053e-07		0.443916	1.06949e-06
0.44681	0.000779889		0.44681	0.00055667		0.44681	0		0.44681	1.25094e-06		0.44681	7.04162e-07		0.44681	1.06792e-06
0.449704	0.0007302		0.449704	0.000514921		0.449704	1.11022e-16		0.449704	1.25931e-06		0.449704	7.04339e-07		0.449704	1.06607e-06
0.452598	0.000680984		0.452598	0.000475308		0.452598	1.94289e-16		0.452598	1.26825e-06		0.452598	7.04587e-07		0.452598	1.06391e-06
0.455492	0.000633757		0.455492	0.000438184		0.455492	1.66533e-16		0.455492	1.27774e-06		0.455492	7.04911e-07		0.455492	1.0614e-06
0.458386	0.000588284		0.458386	0.000403415		0.458386	8.32667e-17		0.458386	1.28775e-06		0.458386	7.05317e-07		0.458386	1.05881e-06
0.46128	0.000544495		0.46128	0.000370903		0.46128	0		0.46128	1.29826e-06		0.46128	7.05805e-07		0.46128	1.0564e-06
0.464174	0.000502928		0.464174	0.000340614		0.464174	4.16334e-17		0.464174	1.30923e-06		0.464174	7.06372e-07		0.464174	1.05416e-06
0.467068	0.000463663		0.467068	0.000312726		0.467068	1.11022e-16		0.467068	1.32063e-06		0.467068	7.07005e-07		0.467068	1.05206e-06
0.469961	0.000426512		0.469961	0.000287199		0.469961	6.93889e-17		0.469961	1.33243e-06		0.469961	7.07692e-07		0.469961	1.05009e-06
0.472855	0.000391675		0.472855	0.000263628		0.472855	0		0.472855	1.34458e-06		0.472855	7.08416e-07		0.472855	1.04821e-06
0.475749	0.000359433		0.475749	0.000241791		0.475749	0		0.475749	1.35704e-06		0.475749	7.09159e-07		0.475749	1.04641e-06
0.478643	0.000330294		0.478643	0.000221609		0.478643	2.77556e-17		0.478643	1.36975e-06		0.478643	7.099e-07		0.478643	1.04463e-06
0.481537	0.00030356		0.481537	0.000202917		0.481537	8.32667e-17		0.481537	1.38264e-06		0.481537	7.10609e-07		0.481537	1.04284e-06
0.484431	0.000278271		0.484431	0.000185665		0.484431	5.55112e-17		0.484431	1.39563e-06		0.484431	7.11249e-07		0.484431	1.04099e-06
0.487325	0.000254576		0.487325	0.000170131		0.487325	1.31707e-09		0.487325	1.40864e-06		0.487325	7.11779e-07		0.487325	1.03901e-06
0.490219	0.000232615		0.490219	0.000156032		0.490219	6.14946e-09		0.490219	1.42157e-06		0.490219	7.12151e-07		0.490219	1.03684e-06
0.493113	0.000212447		0.493113	0.000143235		0.493113	1.49048e-08		0.493113	1.43431e-06		0.493113	7.12641e-07		0.493113	1.03441e-06
0.496006	0.000194036		0.496006	0.000131675		0.496006	2.68825e-08		0.496006	1.44673e-06		0.496006	7.13541e-07		0.496006	1.03212e-06
0.4989	0.000177256		0.4989	0.000121015		0.4989	4.16543e-08		0.4989	1.45869e-06		0.4989	7.14834e-07		0.4989	1.03037e-06
0.501794	0.000161745		0.501794	0.000111203		0.501794	5.88397e-08		0.501794	1.47003e-06		0.501794	7.16498e-07		0.501794	1.02916e-06
0.504688	0.000147859		0.504688	0.000102048		0.504688	7.80964e-08		0.504688	1.48059e-06		0.504688	7.1851e-07		0.504688	1.02846e-06
0.507582	0.000135516		0.507582	9.35486e-05		0.507582	9.91086e-08		0.507582	1.49096e-06		0.507582	7.20841e-07		0.507582	1.02825e-06
0.510476	0.000124064		0.510476	8.59284e-05		0.510476	1.21572e-07		0.510476	1.50179e-06		0.510476	7.23455e-07		0.510476	1.02852e-06
0.51337	0.000113396		0.51337	7.90075e-05		0.51337	1.45181e-07		0.51337	1.51295e-06		0.51337	7.26312e-07		0.51337	1.02923e-06
0.516264	0.000103563		0.516264	7.26485e-05		0.516264	1.69608e-07		0.516264	1.52429e-06		0.516264	7.29364e-07		0.516264	1.03036e-06
0.519158	9.46567e-05		0.519158	6.69079e-05		0.519158	1.9448e-07		0.519158	1.53561e-06		0.519158	7.32561e-07		0.519158	1.03187e-06
0.522051	8.66187e-05		0.522051	6.17146e-05		0.522051	2.19333e-07		0.522051	1.54662e-06		0.522051	7.35831e-07		0.522051	1.03373e-06
0.524945	7.94477e-05		0.524945	5.70019e-05		0.524945	2.43585e-07		0.524945	1.55693e-06		0.524945	7.39079e-07		0.524945	1.03584e-06
0.524945	7.94477e-05		0.524945	5.70019e-05		0.524945	2.43585e-07		0.524945	1.55693e-06		0.524945	7.39079e-07		0.524945	1.03584e-06
0.527839	7.30598e-05		0.527839	5.26777e-05		0.527839	2.67708e-07		0.527839	1.56706e-06		0.527839	7.42306e-07		0.527839	1.03798e-06
0.530733	6.71889e-05		0.530733	4.86698e-05		0.530733	2.92506e-07		0.530733	1.57771e-06		0.530733	7.45555e-07		0.530733	1.03994e-06
0.533627	6.17767e-05		0.533627	4.49838e-05		0.533627	3.18012e-07		0.533627	1.58887e-06		0.533627	7.4879e-07		0.533627	1.04164e-06
0.536521	5.68069e-05		0.536521	4.15915e-05		0.536521	3.44284e-07		0.536521	1.60051e-06		0.536521	7.51962e-07		0.536521	1.04331e-06
0.539415	5.22479e-05		0.539415	3.84664e-05		0.539415	3.71335e-07		0.539415	1.61258e-06		0.539415	7.5523e-07		0.539415	1.04524e-06
0.542309	4.81065e-05		0.542309	3.55975e-05		0.542309	3.99118e-07		0.542309	1.62504e-06		0.542309	7.58777e-07		0.542309	1.04742e-06
0.545203	4.43971e-05		0.545203	3.29682e-05		0.545203	4.27574e-07		0.545203	1.63785e-06		0.545203	7.62593e-07		0.545203	1.04981e-06
0.548096	4.10875e-05		0.548096	3.05663e-05		0.548096	4.56616e-07		0.548096	1.65093e-06		0.548096	7.66648e-07		0.548096	1.05237e-06
0.55099	3.80779e-05		0.55099	2.8364e-05		0.55099	4.86158e-07		0.55099	1.66417e-06		0.55099	7.70911e-07		0.55099	1.05503e-06
0.553884	3.52553e-05		0.553884	2.63394e-05		0.553884	5.15983e-07		0.553884	1.67743e-06		0.553884	7.75347e-07		0.553884	1.05774e-06
0.556778	3.25918e-05		0.556778	2.44815e-05		0.556778	5.45878e-07		0.556778	1.69057e-06		0.556778	7.79921e-07		0.556778	1.06043e-06
0.559672	3.01099e-05		0.559672	2.27784e-05		0.559672	5.75982e-07		0.559672	1.70343e-06		0.559672	7.84597e-07		0.559672	1.06304e-06
0.562566	2.78193e-05		0.562566	2.1217e-05		0.562566	6.06464e-07		0.562566	1.71583e-06		0.562566	7.89333e-07		0.562566	1.0655e-06
0.56546	2.57122e-05		0.56546	1.97869e-05		0.56546	6.37342e-07		0.56546	1.72756e-06		0.56546	7.94089e-07		0.56546	1.06773e-06
0.568354	2.3776e-05		0.568354	1.84791e-05		0.568354	6.6859e-07		0.568354	1.73906e-06		0.568354	7.9882e-07		0.568354	1.06966e-06
0.571248	2.20033e-05		0.571248	1.72685e-05		0.571248	7.00079e-07		0.571248	1.75082e-06		0.571248	8.03479e-07		0.571248	1.07121e-06
0.574142	2.0384e-05		0.574142	1.61376e-05		0.574142	7.31625e-07		0.574142	1.76273e-06		0.574142	8.08015e-07		0.574142	1.07228e-06
0.577035	1.89071e-05		0.577035	1.50846e-05		0.577035	7.63017e-07		0.577035	1.77464e-06		0.577035	8.12372e-07		0.577035	1.07321e-06
0.579929	1.75611e-05		0.579929	1.41014e-05		0.579929	7.94023e-07		0.579929	1.78641e-06		0.579929	8.16491e-07		0.579929	1.07441e-06
0.582823	1.63346e-05		0.582823	1.31821e-05		0.582823	8.24381e-07		0.582823	1.7982e-06		0.582823	8.20304e-07		0.582823	1.07588e-06
0.585717	1.52068e-05		0.585717	1.23231e-05		0.585717	8.5378e-07		0.585717	1.8107e-06		0.585717	8.23734e-07		0.585717	1.07759e-06
0.588611	1.4166e-05		0.588611	1.15234e-05		0.588611	8.81801e-07		0.588611	1.82423e-06		0.588611	8.27043e-07		0.588611	1.07952e-06
0.591505	1.32127e-05		0.591505	1.07819e-05		0.591505	9.09123e-07		0.591505	1.83857e-06		0.591505	8.30533e-07		0.591505	1.08165e-06
0.594399	1.23414e-05		0.594399	1.00941e-05		0.594399	9.36759e-07		0.594399	1.85356e-06		0.594399	8.34197e-07		0.594399	1.08397e-06
0.597293	1.15447e-05		0.597293	9.45491e-06		0.597293	9.6472e-07		0.597293	1.86907e-06		0.597293	8.38021e-07		0.597293	1.08644e-06
0.600186	1.08116e-05		0.600186	8.863e-06		0.600186	9.92795e-07		0.600186	1.88497e-06		0.600186	8.41986e-07		0.600186	1.08905e-06
0.60308	1.01303e-05		0.60308	8.31683e-06		0.60308	1.02072e-06		0.60308	1.90116e-06		0.60308	8.46075e-07		0.60308	1.09177e-06
0.605974	9.4931e-06		0.605974	7.81328e-06		0.605974	1.04821e-06		0.605974	1.91753e-06		0.605974	8.50267e-07		0.605974	1.09458e-06
0.608868	8.89536e-06		0.608868	7.3488e-06		0.608868	1.07495e-06		0.608868	1.93398e-06		0.608868	8.5454e-07		0.608868	1.09745e-06
0.611762	8.33501e-06		0.611762	6.91934e-06		0.611762	1.10159e-06		0.611762	1.95041e-06		0.611762	8.58871e-07		0.611762	1.10034e-06
0.614656	7.81235e-06		0.614656	6.52081e-06		0.614656	1.12894e-06		0.614656	1.96673e-06		0.614656	8.63238e-07		0.614656	1.10321e-06
0.61755	7.32212e-06		0.61755	6.14964e-06		0.61755	1.15696e-06		0.61755	1.98283e-06		0.61755	8.67614e-07		0.61755	1.10597e-06
0.620444	6.86189e-06		0.620444	5.80322e-06		0.620444	1.18557e-06		0.620444	1.99862e-06		0.620444	8.71974e-07		0.620444	1.10884e-06
0.623338	6.43417e-06		0.623338	5.48005e-06		0.623338	1.21474e-06		0.623338	2.014e-06		0.623338	8.76291e-07		0.623338	1.11209e-06
0.626231	6.03784e-06		0.626231	5.17926e-06		0.626231	1.24446e-06		0.626231	2.02886e-06		0.626231	8.80536e-07		0.626231	1.11569e-06
0.629125	5.67151e-06		0.629125	4.90023e-06		0.629125	1.27473e-06		0.629125	2.04359e-06		0.629125	8.84681e-07		0.629125	1.1196e-06
0.632019	5.33385e-06		0.632019	4.64084e-06		0.632019	1.30553e-06		0.632019	2.05868e-06		0.632019	8.88696e-07		0.632019	1.12385e-06
0.634913	5.02334e-06		0.634913	4.39974e-06		0.634913	1.33671e-06		0.634913	2.07411e-06		0.634913	8.92553e-07		0.634913	1.12846e-06
0.637807	4.73767e-06		0.637807	4.17695e-06		0.637807	1.36805e-06		0.637807	2.08986e-06		0.637807	8.96223e-07		0.637807	1.13348e-06
0.640701	4.47465e-06		0.640701	3.9716e-06		0.640701	1.39924e-06		0.640701	2.10589e-06		0.640701	8.99984e-07		0.640701	1.13899e-06
0.643595	4.2323e-06		0.643595	3.78367e-06		0.643595	1.42987e-06		0.643595	2.12205e-06		0.643595	9.04166e-07		0.643595	1.1452e-06
0.643595	4.2323e-06		0.643595	3.78367e-06		0.643595	1.42987e-06		0.643595	2.12205e-06		0.643595	9.04166e-07		0.643595	1.1452e-06
0.646489	4.00649e-06		0.646489	3.60948e-06		0.646489	1.45993e-06		0.646489	2.13821e-06		0.646489	9.08622e-07		0.646489	1.15171e-06
0.649383	3.79508e-06		0.649383	3.44512e-06		0.649383	1.48975e-06		0.649383	2.15442e-06		0.649383	9.13184e-07		0.649383	1.15806e-06
0.652277	3.60018e-06		0.652277	3.29132e-06		0.652277	1.51953e-06		0.652277	2.17071e-06		0.652277	9.17848e-07		0.652277	1.16423e-06
0.65517	3.41894e-06		0.65517	3.14903e-06		0.65517	1.54939e-06		0.65517	2.18706e-06		0.65517	9.22569e-07		0.65517	1.17014e-06
0.658064	3.24773e-06		0.658064	3.0166e-06		0.658064	1.57939e-06		0.658064	2.20344e-06		0.658064	9.27307e-07		0.658064	1.1757e-06
0.660958	3.08694e-06		0.660958	2.89211e-06		0.660958	1.60952e-06		0.660958	2.21983e-06		0.660958	9.32028e-07		0.660958	1.18083e-06
0.663852	2.93594e-06		0.663852	2.77579e-06		0.663852	1.63975e-06		0.663852	2.23619e-06		0.663852	9.36709e-07		0.663852	1.18544e-06
0.666746	2.78838e-06		0.666746	2.66796e-06		0.666746	1.67009e-06		0.666746	2.25246e-06		0.666746	9.41315e-07		0.666746	1.18974e-06
0.66964	2.65115e-06		0.66964	2.5677e-06		0.66964	1.70073e-06		0.66964	2.26854e-06		0.66964	9.45816e-07		0.66964	1.19398e-06
0.672534	2.52567e-06		0.672534	2.47406e-06		0.672534	1.73183e-06		0.672534	2.28438e-06		0.672534	9.50182e-07		0.672534	1.19816e-06
0.675428	2.41079e-06		0.675428	2.38391e-06		0.675428	1.76347e-06		0.675428	2.29989e-06		0.675428	9.54381e-07		0.675428	1.20225e-06
0.678322	2.30652e-06		0.678322	2.29627e-06		0.678322	1.79563e-06		0.678322	2.31499e-06		0.678322	9.58382e-07		0.678322	1.20624e-06
0.681215	2.21671e-06		0.681215	2.21446e-06		0.681215	1.82825e-06		0.681215	2.32959e-06		0.681215	9.62148e-07		0.681215	1.21012e-06
0.684109	2.141e-06		0.684109	2.14421e-06		0.684109	1.86127e-06		0.684109	2.34358e-06		0.684109	9.65636e-07		0.684109	1.21386e-06
0.687003	2.06654e-06		0.687003	2.08623e-06		0.687003	1.8946e-06		0.687003	2.35681e-06		0.687003	9.68793e-07		0.687003	1.21742e-06
0.689897	1.99507e-06		0.689897	2.03855e-06		0.689897	1.92818e-06		0.689897	2.36912e-06		0.689897	9.71552e-07		0.689897	1.22079e-06
0.692791	1.92719e-06		0.692791	1.99478e-06		0.692791	1.9619e-06		0.692791	2.38089e-06		0.692791	9.73824e-07		0.692791	1.22392e-06
0.695685	1.86336e-06		0.695685	1.9497e-06		0.695685	1.99564e-06		0.695685	2.39257e-06		0.695685	9.75838e-07		0.695685	1.22677e-06
0.698579	1.80386e-06		0.698579	1.90702e-06		0.698579	2.02927e-06		0.698579	2.40414e-06		0.698579	9.77876e-07		0.698579	1.2293e-06
0.701473	1.74853e-06		0.701473	1.8674e-06		0.701473	2.0626e-06		0.701473	2.41551e-06		0.701473	9.79907e-07		0.701473	1.23144e-06
0.704367	1.69736e-06		0.704367	1.83107e-06		0.704367	2.09536e-06		0.704367	2.42653e-06		0.704367	9.81875e-07		0.704367	1.23312e-06
0.70726	1.65035e-06		0.70726	1.79809e-06		0.70726	2.12723e-06		0.70726	2.43703e-06		0.70726	9.83701e-07		0.70726	1.23426e-06
0.710154	1.60744e-06		0.710154	1.76852e-06		0.710154	2.15772e-06		0.710154	2.44677e-06		0.710154	9.85279e-07		0.710154	1.23477e-06
0.713048	1.56859e-06		0.713048	1.74238e-06		0.713048	2.18615e-06		0.713048	2.45535e-06		0.713048	9.86453e-07		0.713048	1.23449e-06
0.715942	1.53371e-06		0.715942	1.71954e-06		0.715942	2.21136e-06		0.715942	2.46203e-06		0.715942	9.86946e-07		0.715942	1.23352e-06
0.715942	1.53371e-06		0.715942	1.71954e-06		0.715942	2.21136e-06		0.715942	2.46203e-06		0.715942	9.86946e-07		0.715942	1.23352e-06
0.718836	1.50217e-06		0.718836	1.69965e-06		0.718836	2.23451e-06		0.718836	2.46751e-06		0.718836	9.87022e-07		0.718836	1.23234e-06
0.72173	1.47324e-06		0.72173	1.68196e-06		0.72173	2.25732e-06		0.72173	2.4728e-06		0.72173	9.87073e-07		0.72173	1.23116e-06
0.724624	1.44677e-06		0.724624	1.66599e-06		0.724624	2.27972e-06		0.724624	2.47775e-06		0.724624	9.87047e-07		0.724624	1.22989e-06
0.727518	1.42293e-06		0.727518	1.65182e-06		0.727518	2.30184e-06		0.727518	2.48236e-06		0.727518	9.86948e-07		0.727518	1.22852e-06
0.730412	1.40176e-06		0.730412	1.63946e-06		0.730412	2.32378e-06		0.730412	2.48663e-06		0.730412	9.86777e-07		0.730412	1.22702e-06
0.733305	1.38281e-06		0.733305	1.62888e-06		0.733305	2.34556e-06		0.733305	2.49053e-06		0.733305	9.86526e-07		0.733305	1.22538e-06
0.736199	1.36562e-06		0.736199	1.62007e-06		0.736199	2.36717e-06		0.736199	2.49406e-06		0.736199	9.86187e-07		0.736199	1.22355e-06
0.739093	1.35019e-06		0.739093	1.613e-06		0.739093	2.38856e-06		0.739093	2.4972e-06		0.739093	9.85748e-07		0.739093	1.2215e-06
0.741987	1.33658e-06		0.741987	1.60754e-06		0.741987	2.40967e-06		0.741987	2.49996e-06		0.741987	9.85195e-07		0.741987	1.2192e-06
0.744881	1.32481e-06		0.744881	1.6035e-06		0.744881	2.43038e-06		0.744881	2.50234e-06		0.744881	9.84514e-07		0.744881	1.21662e-06
0.747775	1.31491e-06		0.747775	1.6008e-06		0.747775	2.45059e-06		0.747775	2.5043e-06		0.747775	9.83687e-07		0.747775	1.21372e-06
0.750669	1.30688e-06		0.750669	1.5994e-06		0.750669	2.47017e-06		0.750669	2.50585e-06		0.750669	9.8266e-07		0.750669	1.21048e-06
0.753563	1.30072e-06		0.753563	1.59923e-06		0.753563	2.48899e-06		0.753563	2.50696e-06		0.753563	9.8131e-07		0.753563	1.20687e-06
0.756457	1.29639e-06		0.756457	1.60021e-06		0.756457	2.50687e-06		0.756457	2.50763e-06		0.756457	9.79544e-07		0.756457	1.20288e-06
0.75935	1.29359e-06		0.75935	1.60226e-06		0.75935	2.52365e-06		0.75935	2.50747e-06		0.75935	9.7734e-07		0.75935	1.19848e-06
0.762244	1.29203e-06		0.762244	1.60527e-06		0.762244	2.53909e-06		0.762244	2.50598e-06		0.762244	9.7467e-07		0.762244	1.19353e-06
0.765138	1.29169e-06		0.765138	1.60914e-06		0.765138	2.55297e-06		0.765138	2.50301e-06		0.765138	9.71504e-07		0.765138	1.18788e-06
0.768032	1.2925e-06		0.768032	1.6138e-06		0.768032	2.56512e-06		0.768032	2.49841e-06		0.768032	9.6781e-07		0.768032	1.18152e-06
0.770926	1.2944e-06		0.770926	1.6192e-06		0.770926	2.57538e-06		0.770926	2.49204e-06		0.770926	9.63556e-07		0.770926	1.17442e-06
0.77382	1.29726e-06		0.77382	1.62513e-06		0.77382	2.5835e-06		0.77382	2.48375e-06		0.77382	9.58708e-07		0.77382	1.16656e-06
0.776714	1.30093e-06		0.776714	1.63133e-06		0.776714	2.58918e-06		0.776714	2.47336e-06		0.776714	9.53224e-07		0.776714	1.15793e-06
0.779608	1.30522e-06		0.779608	1.63748e-06		0.779608	2.59209e-06		0.779608	2.4607e-06		0.779608	9.47057e-07		0.779608	1.14851e-06
0.782502	1.30991e-06		0.782502	1.64349e-06		0.782502	2.59196e-06		0.782502	2.44563e-06		0.782502	9.40171e-07		0.782502	1.13828e-06
0.785396	1.31479e-06		0.785396	1.64929e-06		0.785396	2.58851e-06		0.785396	2.42801e-06		0.785396	9.32546e-07		0.785396	1.12726e-06
0.788289	1.3197e-06		0.788289	1.65453e-06		0.788289	2.58143e-06		0.788289	2.40776e-06		0.788289	9.24178e-07		0.788289	1.11547e-06
0.791183	1.32452e-06		0.791183	1.65884e-06		0.791183	2.57041e-06		0.791183	2.38479e-06		0.791183	9.15083e-07		0.791183	1.10294e-06
0.794077	1.329e-06		0.794077	1.66185e-06		0.794077	2.55511e-06		0.794077	2.35906e-06		0.794077	9.05078e-07		0.794077	1.08951e-06
0.796971	1.33275e-06		0.796971	1.66313e-06		0.796971	2.53526e-06		0.796971	2.33053e-06		0.796971	8.9395e-07		0.796971	1.07498e-06
0.799865	1.33534e-06		0.799865	1.66222e-06		0.799865	2.51069e-06		0.799865	2.29921e-06		0.799865	8.81673e-07		0.799865	1.05932e-06
0.799865	1.33534e-06		0.799865	1.66222e-06		0.799865	2.51069e-06		0.799865	2.29921e-06		0.799865	8.81673e-07		0.799865	1.05932e-06
0.802759	1.33639e-06		0.802759	1.6587e-06		0.802759	2.48155e-06		0.802759	2.26508e-06		0.802759	8.68243e-07		0.802759	1.04251e-06
0.805653	1.33567e-06		0.805653	1.65236e-06		0.805653	2.4481e-06		0.805653	2.2277e-06		0.805653	8.53718e-07		0.805653	1.02459e-06
0.808547	1.33295e-06		0.808547	1.64307e-06		0.808547	2.41037e-06		0.808547	2.18669e-06		0.808547	8.38175e-07		0.808547	1.00565e-06
0.811441	1.32805e-06		0.811441	1.63066e-06		0.811441	2.36823e-06		0.811441	2.14222e-06		0.811441	8.21666e-07		0.811441	9.85718e-07
0.814334	1.32087e-06		0.814334	1.61505e-06		0.814334	2.32165e-06		0.814334	2.0946e-06		0.814334	8.04261e-07		0.814334	9.64862e-07
0.817228	1.31128e-06		0.817228	1.59622e-06		0.817228	2.27117e-06		0.817228	2.04426e-06		0.817228	7.8607e-07		0.817228	9.42968e-07
0.820122	1.29919e-06		0.820122	1.57414e-06		0.820122	2.21755e-06		0.820122	1.99154e-06		0.820122	7.66969e-07		0.820122	9.19942e-07
0.823016	1.28455e-06		0.823016	1.54884e-06		0.823016	2.1608e-06		0.823016	1.93666e-06		0.823016	7.46815e-07		0.823016	8.95898e-07
0.82591	1.26732e-06		0.82591	1.52039e-06		0.82591	2.10022e-06		0.82591	1.8798e-06		0.82591	7.25739e-07		0.82591	8.70989e-07
0.828804	1.24755e-06		0.828804	1.48897e-06		0.828804	2.03523e-06		0.828804	1.82118e-06		0.828804	7.03933e-07		0.828804	8.45412e-07
0.831698	1.22533e-06		0.831698	1.4548e-06		0.831698	1.96653e-06		0.831698	1.76101e-06		0.831698	6.81592e-07		0.831698	8.19301e-07
0.834592	1.20081e-06		0.834592	1.41817e-06		0.834592	1.89764e-06		0.834592	1.69952e-06		0.834592	6.58841e-07		0.834592	7.92653e-07
0.837486	1.17418e-06		0.837486	1.37942e-06		0.837486	1.83235e-06		0.837486	1.63693e-06		0.837486	6.35754e-07		0.837486	7.6557e-07
0.840379	1.14568e-06		0.840379	1.33894e-06		0.840379	1.76869e-06		0.840379	1.57349e-06		0.840379	6.12433e-07		0.840379	7.38252e-07
0.843273	1.11559e-06		0.843273	1.29713e-06		0.843273	1.70246e-06		0.843273	1.50959e-06		0.843273	5.89017e-07		0.843273	7.10837e-07
0.846167	1.08417e-06		0.846167	1.25439e-06		0.846167	1.62997e-06		0.846167	1.44579e-06		0.846167	5.65656e-07		0.846167	6.83465e-07
0.849061	1.05174e-06		0.849061	1.2111e-06		0.849061	1.55217e-06		0.849061	1.38285e-06		0.849061	5.42498e-07		0.849061	6.56281e-07
0.851955	1.01857e-06		0.851955	1.16765e-06		0.851955	1.4885e-06		0.851955	1.32164e-06		0.851955	5.19688e-07		0.851955	6.2944e-07
0.854849	9.84947e-07		0.854849	1.12438e-06		0.854849	1.45642e-06		0.854849	1.26272e-06		0.854849	4.97376e-07		0.854849	6.03098e-07
0.857743	9.51155e-07		0.857743	1.08162e-06		0.857743	1.43267e-06		0.857743	1.20582e-06		0.857743	4.75717e-07		0.857743	5.77428e-07
0.860637	9.17477e-07		0.860637	1.03968e-06		0.860637	1.37584e-06		0.860637	1.15012e-06		0.860637	4.54887e-07		0.860637	5.52632e-07
0.863531	8.8426e-07		0.863531	9.98983e-07		0.863531	1.29009e-06		0.863531	1.09587e-06		0.863531	4.3511e-07		0.863531	5.28969e-07
0.866424	8.52019e-07		0.866424	9.60144e-07		0.866424	1.20733e-06		0.866424	1.04553e-06		0.866424	4.16699e-07		0.866424	5.06808e-07
0.869318	8.21702e-07		0.869318	9.24242e-07		0.869318	1.14698e-06		0.869318	1.00302e-06		0.869318	4.0011e-07		0.869318	4.86733e-07
0.872212	7.95229e-07		0.872212	8.93248e-07		0.872212	1.0796e-06		0.872212	9.6189e-07		0.872212	3.8598e-07		0.872212	4.69738e-07
0.875106	7.76729e-07		0.875106	8.7047e-07		0.875106	9.90134e-07		0.875106	9.3507e-07		0.875106	3.75082e-07		0.875106	4.57753e-07
0.878	7.70213e-07		0.878	8.6171e-07		0.878	9.45871e-07		0.878	9.30767e-07		0.878	3.70612e-07		0.878	4.53412e-07

## Sheet: Radiation heat flux
SN 0			SN 0.2			SN 0.4			SN 0.6			SN 0.8			SN 1
Axial distance	Radiation heat flux W/m2		Axial distance	Radiation heat flux W/m2		Axial distance	Radiation heat flux W/m2		Axial distance	Radiation heat flux W/m2		Axial distance	Radiation heat flux W/m2		Axial distance	Radiation heat flux W/m2
0.00115113	9780.13		0.00115113	10169.4		0.00115113	16018.5		0.00115113	23349.6		0.00115113	27838.1		0.00115113	32362.4
0.00404502	9864.56		0.00404502	10262.7		0.00404502	16196.8		0.00404502	23460.7		0.00404502	28190.6		0.00404502	32582.5
0.00693891	9951.2		0.00693891	10359.8		0.00693891	16392.8		0.00693891	23610.8		0.00693891	28484.3		0.00693891	32727
0.0098328	10053.6		0.0098328	10468.7		0.0098328	16627.6		0.0098328	23831.4		0.0098328	28732.8		0.0098328	32823.8
0.0127267	10174.5		0.0127267	10592.9		0.0127267	16907.5		0.0127267	24141.7		0.0127267	28962.8		0.0127267	32977.3
0.0156206	10310.9		0.0156206	10731.2		0.0156206	17221.5		0.0156206	24529.9		0.0156206	29195.3		0.0156206	33293.9
0.0185145	10455.3		0.0185145	10873.2		0.0185145	17551.8		0.0185145	24974.5		0.0185145	29431.4		0.0185145	33817.2
0.0214084	10601.9		0.0214084	11012.8		0.0214084	17886.6		0.0214084	25453		0.0214084	29690.7		0.0214084	34510.4
0.0243023	10746.3		0.0243023	11148.9		0.0243023	18216.9		0.0243023	25927.5		0.0243023	30046.3		0.0243023	35277.4
0.0271961	10882.9		0.0271961	11278.7		0.0271961	18532.2		0.0271961	26361.3		0.0271961	30544.3		0.0271961	36006.8
0.03009	11009.9		0.03009	11401.6		0.03009	18824.5		0.03009	26738.9		0.03009	31160.5		0.03009	36620.3
0.0329839	11127.4		0.0329839	11519.7		0.0329839	19095.9		0.0329839	27079.5		0.0329839	31822.8		0.0329839	37109.5
0.0358778	11236.6		0.0358778	11633.1		0.0358778	19355.8		0.0358778	27422.7		0.0358778	32442.2		0.0358778	37473.8
0.0387717	11339.6		0.0387717	11743.4		0.0387717	19616.3		0.0387717	27772.2		0.0387717	32953.5		0.0387717	37674.3
0.0416656	11437.2		0.0416656	11853.4		0.0416656	19889.9		0.0416656	28159.3		0.0416656	33356.9		0.0416656	37841.5
0.0445595	11530.4		0.0445595	11965.7		0.0445595	20189.6		0.0445595	28635.8		0.0445595	33684.6		0.0445595	38126.2
0.0474534	11620.4		0.0474534	12079.7		0.0474534	20520.3		0.0474534	29188.5		0.0474534	33926.2		0.0474534	38511.9
0.0503473	11708.9		0.0503473	12192.7		0.0503473	20870		0.0503473	29774.4		0.0503473	34213.7		0.0503473	38875.1
0.0532412	11797.6		0.0532412	12303.9		0.0532412	21230.3		0.0532412	30364.4		0.0532412	34683.5		0.0532412	39068.7
0.056135	11888		0.056135	12414		0.056135	21603.5		0.056135	30991.1		0.056135	35255.2		0.056135	39198.4
0.0590289	11980.8		0.0590289	12523		0.0590289	21993.1		0.0590289	31673.4		0.0590289	35748.2		0.0590289	39409.3
0.0619228	12076.4		0.0619228	12630		0.0619228	22408.8		0.0619228	32189.3		0.0619228	36012.2		0.0619228	39706.9
0.0648167	12174.7		0.0648167	12734.5		0.0648167	22876.2		0.0648167	32474.2		0.0648167	36058.5		0.0648167	40067.6
0.0677106	12275.3		0.0677106	12837		0.0677106	23437.2		0.0677106	32516.1		0.0677106	35961.1		0.0677106	40392.7
0.0706045	12376.8		0.0706045	12938.6		0.0706045	24131.3		0.0706045	32349		0.0706045	35766.9		0.0706045	40573.3
0.0734984	12479		0.0734984	13040.3		0.0734984	24987.5		0.0734984	32157.4		0.0734984	35485.1		0.0734984	40553
0.0763923	12582.5		0.0763923	13142.7		0.0763923	25975.9		0.0763923	31934.7		0.0763923	35168.1		0.0763923	40375.1
0.0792862	12688.8		0.0792862	13246		0.0792862	26971.6		0.0792862	31683.8		0.0792862	34907.9		0.0792862	40178.1
0.0821801	12798.1		0.0821801	13350.3		0.0821801	27901.5		0.0821801	31417.2		0.0821801	34732.5		0.0821801	40042.4
0.085074	12909.4		0.085074	13455.4		0.085074	28714.5		0.085074	31130.1		0.085074	34626.4		0.085074	39952
0.085074	12909.4		0.085074	13455.4		0.085074	28714.5		0.085074	31130.1		0.085074	34626.4		0.085074	39952
0.0879678	13021.7		0.0879678	13561.6		0.0879678	29275.2		0.0879678	30839.4		0.0879678	34558.3		0.0879678	39882.1
0.0908617	13133.7		0.0908617	13669.1		0.0908617	29487.7		0.0908617	30581.4		0.0908617	34506.9		0.0908617	39826.2
0.0937556	13244.6		0.0937556	13777.9		0.0937556	29437.6		0.0937556	30370.7		0.0937556	34469.7		0.0937556	39783.1
0.0966495	13353.7		0.0966495	13888.6		0.0966495	29201.5		0.0966495	30213.3		0.0966495	34447		0.0966495	39747.5
0.0995434	13460.9		0.0995434	14001.1		0.0995434	28834		0.0995434	30106.1		0.0995434	34435.1		0.0995434	39715.7
0.102437	13565.9		0.102437	14115.6		0.102437	28436.5		0.102437	30032.9		0.102437	34429.8		0.102437	39680.7
0.105331	13668.6		0.105331	14231.6		0.105331	28030.1		0.105331	29976		0.105331	34422.2		0.105331	39639
0.108225	13769		0.108225	14348.5		0.108225	27612.8		0.108225	29930.4		0.108225	34408.4		0.108225	39592.1
0.111119	13867		0.111119	14465.6		0.111119	27184.5		0.111119	29894.5		0.111119	34386.7		0.111119	39540.2
0.114013	13962.6		0.114013	14582		0.114013	26769		0.114013	29863.4		0.114013	34355.5		0.114013	39488.9
0.116907	14055.8		0.116907	14696.7		0.116907	26389.6		0.116907	29837.3		0.116907	34318.1		0.116907	39439.9
0.119801	14146.6		0.119801	14808.8		0.119801	26049.9		0.119801	29813.4		0.119801	34276.3		0.119801	39392.2
0.122695	14235		0.122695	14917.8		0.122695	25744.7		0.122695	29789.5		0.122695	34231		0.122695	39344.6
0.125588	14321.1		0.125588	15023.3		0.125588	25467.4		0.125588	29766.9		0.125588	34181.7		0.125588	39294.2
0.128482	14404.7		0.128482	15125.3		0.128482	25212.6		0.128482	29742.6		0.128482	34129.7		0.128482	39240.9
0.131376	14485.9		0.131376	15223.8		0.131376	24974.5		0.131376	29714		0.131376	34078.5		0.131376	39185.7
0.13427	14564.7		0.13427	15319		0.13427	24749.9		0.13427	29678.4		0.13427	34027.8		0.13427	39128.7
0.137164	14641.4		0.137164	15411.3		0.137164	24539.2		0.137164	29634.7		0.137164	33977.6		0.137164	39070.9
0.140058	14715.7		0.140058	15501.1		0.140058	24342.3		0.140058	29582.5		0.140058	33929.1		0.140058	39012.7
0.142952	14787.8		0.142952	15588.8		0.142952	24158.2		0.142952	29522.9		0.142952	33882.4		0.142952	38954.7
0.145846	14857.6		0.145846	15674.8		0.145846	23986.3		0.145846	29457.2		0.145846	33837.9		0.145846	38897.3
0.14874	14925.1		0.14874	15759.2		0.14874	23826		0.14874	29389.5		0.14874	33795.4		0.14874	38840.9
0.151633	14990.2		0.151633	15842.5		0.151633	23676.3		0.151633	29322.3		0.151633	33755.1		0.151633	38785.7
0.154527	15053		0.154527	15925.2		0.154527	23536.5		0.154527	29256.5		0.154527	33716.8		0.154527	38731.7
0.157421	15113.6		0.157421	16007.5		0.157421	23406.4		0.157421	29194.9		0.157421	33680.2		0.157421	38678.7
0.160315	15172		0.160315	16090		0.160315	23285.6		0.160315	29139.8		0.160315	33645.3		0.160315	38626.4
0.163209	15228.4		0.163209	16173		0.163209	23173.5		0.163209	29092		0.163209	33612		0.163209	38574.5
0.166103	15282.9		0.166103	16257		0.166103	23069.5		0.166103	29051.2		0.166103	33580		0.166103	38522.6
0.166103	15282.9		0.166103	16257		0.166103	23069.5		0.166103	29051.2		0.166103	33580		0.166103	38522.6
0.168997	15335.8		0.168997	16342.4		0.168997	22973.1		0.168997	29017.2		0.168997	33548.7		0.168997	38470
0.171891	15387.5		0.171891	16429.6		0.171891	22883.9		0.171891	28989.2		0.171891	33517.6		0.171891	38416.5
0.174785	15438.1		0.174785	16518.8		0.174785	22800.8		0.174785	28965.9		0.174785	33486.2		0.174785	38361.7
0.177678	15487.9		0.177678	16609.8		0.177678	22723.8		0.177678	28946.6		0.177678	33454.1		0.177678	38305.5
0.180572	15536.9		0.180572	16702.9		0.180572	22651.5		0.180572	28930.1		0.180572	33421.1		0.180572	38247.7
0.183466	15585.5		0.183466	16798.2		0.183466	22584.3		0.183466	28915.6		0.183466	33386.7		0.183466	38188.2
0.18636	15634		0.18636	16895.7		0.18636	22521		0.18636	28902.2		0.18636	33350.6		0.18636	38127.2
0.189254	15682.6		0.189254	16995.5		0.189254	22461.2		0.189254	28889.8		0.189254	33312.8		0.189254	38064.5
0.192148	15731.5		0.192148	17097.4		0.192148	22404.4		0.192148	28877.8		0.192148	33273.3		0.192148	37999.4
0.195042	15780.9		0.195042	17201.4		0.195042	22350.1		0.195042	28865.5		0.195042	33232.1		0.195042	37932
0.197936	15831		0.197936	17307.4		0.197936	22298.2		0.197936	28852.4		0.197936	33188.6		0.197936	37863.1
0.20083	15881.9		0.20083	17415.5		0.20083	22247.9		0.20083	28838		0.20083	33142.9		0.20083	37794
0.203723	15933.9		0.203723	17525.7		0.203723	22199.5		0.203723	28822.1		0.203723	33095.9		0.203723	37725
0.206617	15987.2		0.206617	17638		0.206617	22152.5		0.206617	28803.5		0.206617	33048.4		0.206617	37655.3
0.209511	16042.1		0.209511	17752.4		0.209511	22107.2		0.209511	28781.6		0.209511	33001		0.209511	37584.6
0.212405	16098.7		0.212405	17869.1		0.212405	22063.2		0.212405	28756.8		0.212405	32953.6		0.212405	37513.2
0.215299	16157.2		0.215299	17988		0.215299	22020.9		0.215299	28729.9		0.215299	32905.7		0.215299	37441.7
0.215299	16157.2		0.215299	17988		0.215299	22020.9		0.215299	28729.9		0.215299	32905.7		0.215299	37441.7
0.218193	16217.7		0.218193	18109		0.218193	21980.2		0.218193	28701.2		0.218193	32857.4		0.218193	37369.9
0.221087	16280.2		0.221087	18232.3		0.221087	21941.7		0.221087	28670.9		0.221087	32808.3		0.221087	37298
0.223981	16344.9		0.223981	18358.3		0.223981	21905.3		0.223981	28639.3		0.223981	32758		0.223981	37225.8
0.226875	16412		0.226875	18486.9		0.226875	21871.2		0.226875	28606.5		0.226875	32706.7		0.226875	37153.1
0.229768	16481.1		0.229768	18617.8		0.229768	21838.7		0.229768	28572.6		0.229768	32655		0.229768	37079.8
0.232662	16552.4		0.232662	18751.1		0.232662	21808.2		0.232662	28537.6		0.232662	32602.7		0.232662	37006.1
0.235556	16626.2		0.235556	18887.3		0.235556	21779.2		0.235556	28501.6		0.235556	32549.7		0.235556	36931.8
0.23845	16702.3		0.23845	19026.3		0.23845	21751.9		0.23845	28464.5		0.23845	32496.1		0.23845	36857
0.241344	16780.6		0.241344	19168.2		0.241344	21726.4		0.241344	28426.4		0.241344	32441.5		0.241344	36781.4
0.244238	16861.2		0.244238	19313.2		0.244238	21702.3		0.244238	28387.2		0.244238	32386.2		0.244238	36705.1
0.247132	16943.8		0.247132	19461.5		0.247132	21679.3		0.247132	28347.1		0.247132	32330.1		0.247132	36627.9
0.250026	17028.4		0.250026	19613.1		0.250026	21657.3		0.250026	28306.5		0.250026	32273.4		0.250026	36550
0.25292	17115.1		0.25292	19768.3		0.25292	21636.1		0.25292	28265		0.25292	32215.8		0.25292	36471.1
0.255814	17203.9		0.255814	19927		0.255814	21615.3		0.255814	28222.7		0.255814	32157.6		0.255814	36391.2
0.258707	17294.6		0.258707	20089.4		0.258707	21594.8		0.258707	28179.6		0.258707	32098.5		0.258707	36310.3
0.261601	17387.4		0.261601	20255.6		0.261601	21574.6		0.261601	28135.5		0.261601	32038.7		0.261601	36228.3
0.264495	17482.3		0.264495	20425.6		0.264495	21554.5		0.264495	28090.6		0.264495	31978		0.264495	36145.2
0.267389	17579.2		0.267389	20599.4		0.267389	21534.6		0.267389	28045		0.267389	31916.4		0.267389	36061
0.270283	17678.2		0.270283	20776.8		0.270283	21514.4		0.270283	27998.6		0.270283	31853.9		0.270283	35975.7
0.273177	17779.4		0.273177	20957.8		0.273177	21493.9		0.273177	27951.6		0.273177	31790.6		0.273177	35889.3
0.276071	17882.7		0.276071	21142.5		0.276071	21473.1		0.276071	27904		0.276071	31726.2		0.276071	35801.8
0.278965	17988.2		0.278965	21330.8		0.278965	21451.8		0.278965	27855.9		0.278965	31660.9		0.278965	35713.2
0.281859	18096.1		0.281859	21522.8		0.281859	21430.2		0.281859	27807.2		0.281859	31594.7		0.281859	35623.4
0.284752	18206.3		0.284752	21718.4		0.284752	21408.3		0.284752	27758.1		0.284752	31527.4		0.284752	35532.5
0.287646	18319		0.287646	21917.7		0.287646	21386.3		0.287646	27708.5		0.287646	31459.1		0.287646	35440.5
0.29054	18434.3		0.29054	22120.7		0.29054	21364.1		0.29054	27658.5		0.29054	31389.8		0.29054	35347.2
0.293434	18552.1		0.293434	22327.2		0.293434	21341.6		0.293434	27607.9		0.293434	31319.4		0.293434	35252.6
0.296328	18672.5		0.296328	22537.2		0.296328	21318.9		0.296328	27556.7		0.296328	31248.1		0.296328	35156.7
0.299222	18795.6		0.299222	22750.7		0.299222	21295.8		0.299222	27505		0.299222	31175.7		0.299222	35059.6
0.302116	18921.2		0.302116	22967.6		0.302116	21272.6		0.302116	27452.6		0.302116	31102.3		0.302116	34961.3
0.30501	19049.5		0.30501	23187.9		0.30501	21249.2		0.30501	27399.6		0.30501	31027.9		0.30501	34861.8
0.307904	19180.4		0.307904	23411.4		0.307904	21225.9		0.307904	27346		0.307904	30952.6		0.307904	34761.2
0.310797	19314		0.310797	23637.7		0.310797	21202.3		0.310797	27291.5		0.310797	30876.2		0.310797	34659.6
0.313691	19450.1		0.313691	23866.7		0.313691	21178.6		0.313691	27236.2		0.313691	30798.8		0.313691	34556.8
0.313691	19450.1		0.313691	23866.7		0.313691	21178.6		0.313691	27236.2		0.313691	30798.8		0.313691	34556.8
0.316585	19588.7		0.316585	24098.3		0.316585	21154.6		0.316585	27180		0.316585	30720.3		0.316585	34453.1
0.319479	19729.7		0.319479	24332		0.319479	21130.6		0.319479	27122.9		0.319479	30640.8		0.319479	34348.5
0.322373	19873.1		0.322373	24567.4		0.322373	21106.5		0.322373	27064.8		0.322373	30560.5		0.322373	34243.2
0.325267	20018.9		0.325267	24804.4		0.325267	21082.6		0.325267	27006		0.325267	30479.4		0.325267	34137.2
0.328161	20167		0.328161	25042.5		0.328161	21058.8		0.328161	26946.2		0.328161	30397.6		0.328161	34030.4
0.331055	20317.6		0.331055	25281.1		0.331055	21035.1		0.331055	26885.5		0.331055	30315		0.331055	33923
0.333949	20470.5		0.333949	25519.8		0.333949	21011.5		0.333949	26823.8		0.333949	30231.7		0.333949	33815.3
0.336842	20626.1		0.336842	25757.8		0.336842	20987.9		0.336842	26761.3		0.336842	30147.8		0.336842	33707.2
0.339736	20784.3		0.339736	25994.7		0.339736	20964.4		0.339736	26698		0.339736	30063.4		0.339736	33598.7
0.34263	20945		0.34263	26229.7		0.34263	20940.8		0.34263	26634		0.34263	29978.5		0.34263	33490.1
0.345524	21108.3		0.345524	26461.1		0.345524	20917.5		0.345524	26569.4		0.345524	29893		0.345524	33381.4
0.348418	21274.2		0.348418	26687.9		0.348418	20893.9		0.348418	26504.2		0.348418	29807.1		0.348418	33272.7
0.351312	21442.5		0.351312	26909.5		0.351312	20870.3		0.351312	26438.4		0.351312	29721.1		0.351312	33164.2
0.354206	21613.2		0.354206	27124.9		0.354206	20846.5		0.354206	26372.2		0.354206	29634.7		0.354206	33055.8
0.3571	21786.1		0.3571	27332.5		0.3571	20822.6		0.3571	26305.6		0.3571	29548		0.3571	32947.5
0.359994	21961		0.359994	27530.5		0.359994	20798.5		0.359994	26238.5		0.359994	29461.3		0.359994	32839.5
0.362887	22137.4		0.362887	27716.3		0.362887	20774.2		0.362887	26171.2		0.362887	29374.5		0.362887	32731.9
0.365781	22314.9		0.365781	27888.9		0.365781	20749.7		0.365781	26103.6		0.365781	29287.8		0.365781	32624.6
0.368675	22493.4		0.368675	28045.9		0.368675	20725.1		0.368675	26035.7		0.368675	29201.3		0.368675	32517.8
0.371569	22672.2		0.371569	28184.9		0.371569	20700.2		0.371569	25967.5		0.371569	29114.8		0.371569	32411.2
0.374463	22850.6		0.374463	28303.3		0.374463	20674.9		0.374463	25899		0.374463	29028.3		0.374463	32304.8
0.377357	23028.4		0.377357	28399.3		0.377357	20649.4		0.377357	25830.4		0.377357	28942		0.377357	32198.6
0.380251	23205		0.380251	28467.5		0.380251	20623.8		0.380251	25761.6		0.380251	28855.9		0.380251	32092.9
0.383145	23379.1		0.383145	28508		0.383145	20597.9		0.383145	25692.7		0.383145	28770.1		0.383145	31987.5
0.386039	23549.1		0.386039	28517.5		0.386039	20571.8		0.386039	25623.9		0.386039	28684.5		0.386039	31882.4
0.388932	23713.8		0.388932	28494.9		0.388932	20545.5		0.388932	25555		0.388932	28599.2		0.388932	31777.6
0.391826	23871.9		0.391826	28449.3		0.391826	20519.1		0.391826	25486.2		0.391826	28514.2		0.391826	31673
0.39472	24022		0.39472	28381.9		0.39472	20492.8		0.39472	25417.4		0.39472	28429.5		0.39472	31568.7
0.397614	24161.5		0.397614	28287.5		0.397614	20466.4		0.397614	25348.7		0.397614	28345		0.397614	31464.6
0.400508	24287.3		0.400508	28166.7		0.400508	20440.2		0.400508	25280.1		0.400508	28260.8		0.400508	31360.6
0.403402	24396.7		0.403402	28024.2		0.403402	20414.1		0.403402	25211.7		0.403402	28176.9		0.403402	31256.9
0.403402	24396.7		0.403402	28024.2		0.403402	20414.1		0.403402	25211.7		0.403402	28176.9		0.403402	31256.9
0.406296	24489		0.406296	27861		0.406296	20388.2		0.406296	25143.4		0.406296	28093.2		0.406296	31153.4
0.40919	24558.5		0.40919	27678.8		0.40919	20362.4		0.40919	25075.3		0.40919	28009.8		0.40919	31050.1
0.412084	24606.5		0.412084	27481.7		0.412084	20336.4		0.412084	25007.4		0.412084	27926.7		0.412084	30947.1
0.414977	24629.6		0.414977	27272		0.414977	20310.3		0.414977	24939.7		0.414977	27843.7		0.414977	30844.2
0.417871	24626.2		0.417871	27054.9		0.417871	20284.1		0.417871	24872.2		0.417871	27761		0.417871	30741.5
0.420765	24604.8		0.420765	26826.1		0.420765	20257.8		0.420765	24805		0.420765	27678.5		0.420765	30639.1
0.423659	24566.8		0.423659	26591.5		0.423659	20231.5		0.423659	24737.9		0.423659	27596.1		0.423659	30536.9
0.426553	24507.7		0.426553	26356.7		0.426553	20205.1		0.426553	24671.1		0.426553	27514		0.426553	30435
0.429447	24431.5		0.429447	26114.8		0.429447	20178.5		0.429447	24604.5		0.429447	27432		0.429447	30333.4
0.432341	24336.1		0.432341	25875.7		0.432341	20151.9		0.432341	24538.2		0.432341	27350.2		0.432341	30232.1
0.435235	24226		0.435235	25636		0.435235	20125.2		0.435235	24472		0.435235	27268.5		0.435235	30131.2
0.438129	24102.2		0.438129	25396		0.438129	20098.4		0.438129	24406		0.438129	27187		0.438129	30030.6
0.441023	23967.6		0.441023	25163.1		0.441023	20071.6		0.441023	24340.3		0.441023	27105.7		0.441023	29930.4
0.443916	23825		0.443916	24930.3		0.443916	20044.6		0.443916	24274.7		0.443916	27024.6		0.443916	29830.6
0.44681	23672.8		0.44681	24702.8		0.44681	20017.6		0.44681	24209.3		0.44681	26943.7		0.44681	29731.3
0.449704	23517		0.449704	24483.2		0.449704	19990.6		0.449704	24144.2		0.449704	26863.2		0.449704	29632.5
0.452598	23357.2		0.452598	24265.1		0.452598	19963.5		0.452598	24079.3		0.452598	26782.9		0.452598	29534.3
0.455492	23193.5		0.455492	24056.6		0.455492	19936.3		0.455492	24014.6		0.455492	26702.9		0.455492	29436.6
0.458386	23031.9		0.458386	23854.6		0.458386	19909		0.458386	23950.1		0.458386	26623.2		0.458386	29339.3
0.46128	22869.2		0.46128	23657		0.46128	19881.7		0.46128	23885.7		0.46128	26543.7		0.46128	29242.6
0.464174	22706.6		0.464174	23471.6		0.464174	19854.2		0.464174	23821.5		0.464174	26464.5		0.464174	29146.4
0.467068	22550.4		0.467068	23289.2		0.467068	19826.7		0.467068	23757.6		0.467068	26385.8		0.467068	29050.8
0.469961	22392.9		0.469961	23114.5		0.469961	19799		0.469961	23693.9		0.469961	26307.6		0.469961	28956
0.472855	22240.8		0.472855	22950.3		0.472855	19771.3		0.472855	23630.6		0.472855	26229.8		0.472855	28861.7
0.475749	22094.8		0.475749	22789.6		0.475749	19743.3		0.475749	23567.4		0.475749	26152.4		0.475749	28768.1
0.478643	21949.1		0.478643	22639.6		0.478643	19715.2		0.478643	23504.5		0.478643	26075.4		0.478643	28675.1
0.481537	21812.1		0.481537	22495.3		0.481537	19686.9		0.481537	23441.8		0.481537	25998.9		0.481537	28582.7
0.484431	21679.1		0.484431	22356.5		0.484431	19658.5		0.484431	23379.4		0.484431	25922.8		0.484431	28491
0.487325	21549.6		0.487325	22226.8		0.487325	19630		0.487325	23317.4		0.487325	25847.3		0.487325	28400
0.490219	21429.4		0.490219	22102.5		0.490219	19601.4		0.490219	23255.7		0.490219	25772.3		0.490219	28309.6
0.493113	21311.3		0.493113	21984.5		0.493113	19572.7		0.493113	23194.2		0.493113	25697.8		0.493113	28219.9
0.496006	21200.1		0.496006	21873		0.496006	19543.8		0.496006	23133.1		0.496006	25623.7		0.496006	28130.8
0.4989	21095.3		0.4989	21768.2		0.4989	19514.6		0.4989	23072.4		0.4989	25550.2		0.4989	28042.3
0.501794	20993.7		0.501794	21668		0.501794	19485.3		0.501794	23011.9		0.501794	25477.1		0.501794	27954.4
0.504688	20899.8		0.504688	21574		0.504688	19455.6		0.504688	22951.8		0.504688	25404.5		0.504688	27867
0.507582	20808.9		0.507582	21485.8		0.507582	19425.8		0.507582	22892.1		0.507582	25332.4		0.507582	27780.2
0.510476	20723.3		0.510476	21401.8		0.510476	19395.8		0.510476	22832.7		0.510476	25260.8		0.510476	27694
0.51337	20644.6		0.51337	21323.5		0.51337	19365.8		0.51337	22773.8		0.51337	25189.8		0.51337	27608.4
0.516264	20568.2		0.516264	21249		0.516264	19335.6		0.516264	22715.1		0.516264	25119.1		0.516264	27523.1
0.519158	20498.1		0.519158	21179.8		0.519158	19305.1		0.519158	22656.7		0.519158	25048.6		0.519158	27438.2
0.522051	20432.2		0.522051	21113.1		0.522051	19274.6		0.522051	22598.6		0.522051	24978.6		0.522051	27353.5
0.524945	20369		0.524945	21050.4		0.524945	19243.9		0.524945	22540.8		0.524945	24909		0.524945	27269.4
0.524945	20369		0.524945	21050.4		0.524945	19243.9		0.524945	22540.8		0.524945	24909		0.524945	27269.4
0.527839	20310.9		0.527839	20992.5		0.527839	19213.1		0.527839	22483.4		0.527839	24839.7		0.527839	27185.6
0.530733	20256.3		0.530733	20936.1		0.530733	19182		0.530733	22426.2		0.530733	24770.7		0.530733	27102.1
0.533627	20204.6		0.533627	20884		0.533627	19150.6		0.533627	22369.3		0.533627	24702		0.533627	27018.9
0.536521	20156.8		0.536521	20834.2		0.536521	19118.8		0.536521	22312.6		0.536521	24633.6		0.536521	26935.9
0.539415	20111.4		0.539415	20786.9		0.539415	19086.7		0.539415	22256.1		0.539415	24565.3		0.539415	26853.2
0.542309	20069.4		0.542309	20742.7		0.542309	19054.3		0.542309	22199.8		0.542309	24497.3		0.542309	26770.7
0.545203	20030		0.545203	20700.2		0.545203	19021.6		0.545203	22143.7		0.545203	24429.4		0.545203	26688.5
0.548096	19993.3		0.548096	20660.3		0.548096	18988.7		0.548096	22087.7		0.548096	24361.7		0.548096	26606.5
0.55099	19959		0.55099	20622.3		0.55099	18955.5		0.55099	22031.9		0.55099	24294.1		0.55099	26524.7
0.553884	19927.2		0.553884	20586		0.553884	18921.9		0.553884	21976.2		0.553884	24226.6		0.553884	26443.1
0.556778	19897.3		0.556778	20551.3		0.556778	18888.2		0.556778	21920.6		0.556778	24159.3		0.556778	26361.7
0.559672	19869.8		0.559672	20518.8		0.559672	18854.1		0.559672	21865.1		0.559672	24092		0.559672	26280.4
0.562566	19843.9		0.562566	20487.5		0.562566	18819.7		0.562566	21809.6		0.562566	24024.8		0.562566	26199.4
0.56546	19819.4		0.56546	20457.4		0.56546	18785.1		0.56546	21754.2		0.56546	23957.7		0.56546	26118.5
0.568354	19796.8		0.568354	20428.7		0.568354	18750.1		0.568354	21698.8		0.568354	23890.6		0.568354	26037.7
0.571248	19775.4		0.571248	20400.9		0.571248	18714.8		0.571248	21643.4		0.571248	23823.6		0.571248	25957.1
0.574142	19755.1		0.574142	20374.1		0.574142	18679.1		0.574142	21588.1		0.574142	23756.6		0.574142	25876.7
0.577035	19736.1		0.577035	20348.1		0.577035	18643.1		0.577035	21532.7		0.577035	23689.7		0.577035	25796.4
0.579929	19718.1		0.579929	20322.9		0.579929	18606.8		0.579929	21477.4		0.579929	23622.8		0.579929	25716.2
0.582823	19701		0.582823	20298.3		0.582823	18570.2		0.582823	21422		0.582823	23555.9		0.582823	25636.1
0.585717	19684.9		0.585717	20274.2		0.585717	18533.2		0.585717	21366.6		0.585717	23489		0.585717	25556.1
0.588611	19669.6		0.588611	20250.5		0.588611	18496		0.588611	21311.2		0.588611	23422.2		0.588611	25476.1
0.591505	19654.9		0.591505	20227.3		0.591505	18458.4		0.591505	21255.7		0.591505	23355.4		0.591505	25396.3
0.594399	19641		0.594399	20204.5		0.594399	18420.7		0.594399	21200.4		0.594399	23288.7		0.594399	25316.6
0.597293	19627.6		0.597293	20182.2		0.597293	18382.8		0.597293	21145		0.597293	23222		0.597293	25237
0.600186	19614.8		0.600186	20160.3		0.600186	18344.7		0.600186	21089.8		0.600186	23155.5		0.600186	25157.5
0.60308	19602.5		0.60308	20138.7		0.60308	18306.4		0.60308	21034.5		0.60308	23088.9		0.60308	25078
0.605974	19590.7		0.605974	20117.5		0.605974	18268		0.605974	20979.3		0.605974	23022.4		0.605974	24998.5
0.608868	19579.6		0.608868	20096.6		0.608868	18229.5		0.608868	20924.2		0.608868	22956		0.608868	24919.1
0.611762	19569		0.611762	20076.2		0.611762	18191		0.611762	20869.3		0.611762	22889.8		0.611762	24839.8
0.614656	19559		0.614656	20056.3		0.614656	18152.6		0.614656	20814.6		0.614656	22823.8		0.614656	24760.8
0.61755	19549.8		0.61755	20036.8		0.61755	18114.3		0.61755	20760.2		0.61755	22758		0.61755	24681.9
0.620444	19541.2		0.620444	20017.9		0.620444	18076.1		0.620444	20706		0.620444	22692.4		0.620444	24603.2
0.623338	19533.4		0.623338	19999.6		0.623338	18038.2		0.623338	20652.1		0.623338	22627		0.623338	24524.7
0.626231	19526.4		0.626231	19982.1		0.626231	18000.6		0.626231	20598.6		0.626231	22562		0.626231	24446.4
0.629125	19520.2		0.629125	19965.4		0.629125	17963.5		0.629125	20545.5		0.629125	22497.3		0.629125	24368.5
0.632019	19514.8		0.632019	19949.5		0.632019	17926.9		0.632019	20493		0.632019	22433.1		0.632019	24290.9
0.634913	19510.6		0.634913	19934.7		0.634913	17890.9		0.634913	20441.3		0.634913	22369.5		0.634913	24213.9
0.637807	19507.5		0.637807	19920.9		0.637807	17855.8		0.637807	20390.3		0.637807	22306.7		0.637807	24137.5
0.640701	19505.8		0.640701	19908.5		0.640701	17821.6		0.640701	20340.4		0.640701	22244.8		0.640701	24061.9
0.643595	19505.6		0.643595	19897.5		0.643595	17788.5		0.643595	20291.6		0.643595	22184		0.643595	23987.3
0.643595	19505.6		0.643595	19897.5		0.643595	17788.5		0.643595	20291.6		0.643595	22184		0.643595	23987.3
0.646489	19507		0.646489	19888.2		0.646489	17756.7		0.646489	20243.9		0.646489	22124.3		0.646489	23913.7
0.649383	19510.1		0.649383	19880.5		0.649383	17726.2		0.649383	20197.7		0.649383	22065.9		0.649383	23841.3
0.652277	19515		0.652277	19874.8		0.652277	17697.4		0.652277	20153.1		0.652277	22008.9		0.652277	23770.2
0.65517	19521.9		0.65517	19871.1		0.65517	17670		0.65517	20110		0.65517	21953.6		0.65517	23700.6
0.658064	19530.7		0.658064	19869.3		0.658064	17644.3		0.658064	20068.6		0.658064	21899.9		0.658064	23632.5
0.660958	19541.5		0.660958	19869.6		0.660958	17620		0.660958	20028.9		0.660958	21847.8		0.660958	23565.9
0.663852	19553.8		0.663852	19871.6		0.663852	17597.1		0.663852	19990.7		0.663852	21797.3		0.663852	23500.9
0.666746	19568.3		0.666746	19875.6		0.666746	17575.6		0.666746	19954.2		0.666746	21748.4		0.666746	23437.5
0.66964	19584.3		0.66964	19881.5		0.66964	17555.5		0.66964	19919.3		0.66964	21701.3		0.66964	23376.1
0.672534	19602.1		0.672534	19889		0.672534	17536.7		0.672534	19885.9		0.672534	21655.7		0.672534	23316.5
0.675428	19621.4		0.675428	19898		0.675428	17520.4		0.675428	19854.1		0.675428	21611.8		0.675428	23258.7
0.678322	19641.8		0.678322	19908.4		0.678322	17506		0.678322	19824.2		0.678322	21569.4		0.678322	23203
0.681215	19663.8		0.681215	19920.4		0.681215	17493.1		0.681215	19797.1		0.681215	21528.9		0.681215	23149.2
0.684109	19688.9		0.684109	19935.6		0.684109	17482.2		0.684109	19771.3		0.684109	21491.8		0.684109	23098.3
0.687003	19714.6		0.687003	19951.4		0.687003	17472.6		0.687003	19748.4		0.687003	21456.2		0.687003	23051
0.689897	19742.3		0.689897	19969.4		0.689897	17465.5		0.689897	19726.5		0.689897	21423.7		0.689897	23006.1
0.692791	19770.6		0.692791	19988.1		0.692791	17458.7		0.692791	19707		0.692791	21392.9		0.692791	22966
0.695685	19800.3		0.695685	20008.5		0.695685	17454.5		0.695685	19688.9		0.695685	21364.9		0.695685	22927.8
0.698579	19830.6		0.698579	20029.5		0.698579	17451.3		0.698579	19672.9		0.698579	21338.9		0.698579	22893.6
0.701473	19862		0.701473	20051.8		0.701473	17449.7		0.701473	19658.2		0.701473	21315.8		0.701473	22862.1
0.704367	19893.7		0.704367	20074.5		0.704367	17449.2		0.704367	19645.3		0.704367	21294.6		0.704367	22834.1
0.70726	19925.6		0.70726	20097.7		0.70726	17449.9		0.70726	19633.6		0.70726	21276		0.70726	22808.5
0.710154	19957.6		0.710154	20120.9		0.710154	17451.2		0.710154	19623.2		0.710154	21259.1		0.710154	22785.7
0.713048	19989		0.713048	20143.5		0.713048	17453.3		0.713048	19613.6		0.713048	21244		0.713048	22764.6
0.715942	20020.2		0.715942	20165.9		0.715942	17455.5		0.715942	19604.6		0.715942	21230.1		0.715942	22744.8
0.715942	20020.2		0.715942	20165.9		0.715942	17455.5		0.715942	19604.6		0.715942	21230.1		0.715942	22744.8
0.718836	20049.9		0.718836	20186.9		0.718836	17457.6		0.718836	19595.9		0.718836	21217		0.718836	22726.3
0.72173	20078.8		0.72173	20207		0.72173	17459.3		0.72173	19586.8		0.72173	21204.4		0.72173	22707.9
0.724624	20105.2		0.724624	20224.6		0.724624	17459.7		0.724624	19577.3		0.724624	21191.2		0.724624	22688.9
0.727518	20129.6		0.727518	20240.4		0.727518	17459		0.727518	19566.1		0.727518	21177.4		0.727518	22668.1
0.730412	20150.2		0.730412	20252.3		0.730412	17455.7		0.730412	19553.7		0.730412	21161.2		0.730412	22645
0.733305	20168.2		0.733305	20261.6		0.733305	17450.6		0.733305	19538.2		0.733305	21143.1		0.733305	22617.8
0.736199	20181.8		0.736199	20266.6		0.736199	17441.9		0.736199	19520.5		0.736199	21120.7		0.736199	22586.9
0.739093	20190.9		0.739093	20267.4		0.739093	17430.3		0.739093	19498.6		0.739093	21094.9		0.739093	22549.9
0.741987	20195.1		0.741987	20263.4		0.741987	17413.8		0.741987	19473.3		0.741987	21063		0.741987	22507.6
0.744881	20193.9		0.744881	20254.4		0.744881	17394.4		0.744881	19442.4		0.744881	21026.8		0.744881	22456.9
0.747775	20187.2		0.747775	20240.1		0.747775	17370.5		0.747775	19408.1		0.747775	20984		0.747775	22400.4
0.750669	20174.9		0.750669	20220.8		0.750669	17342.6		0.750669	19368.9		0.750669	20935.5		0.750669	22336.6
0.753563	20157.6		0.753563	20196.7		0.753563	17311.1		0.753563	19324.8		0.753563	20881		0.753563	22265.9
0.756457	20135.3		0.756457	20168.2		0.756457	17276.2		0.756457	19277.1		0.756457	20820.2		0.756457	22189.9
0.75935	20109.1		0.75935	20136.2		0.75935	17239.1		0.75935	19225.9		0.75935	20755.3		0.75935	22109.5
0.762244	20079.6		0.762244	20101.2		0.762244	17200.5		0.762244	19172.7		0.762244	20686.8		0.762244	22027.3
0.765138	20048.2		0.765138	20064.8		0.765138	17161.8		0.765138	19118.5		0.765138	20616.5		0.765138	21945.3
0.768032	20017		0.768032	20028.6		0.768032	17124.3		0.768032	19064.7		0.768032	20545.9		0.768032	21865.7
0.770926	19987.6		0.770926	19994.2		0.770926	17088.7		0.770926	19012.3		0.770926	20476.7		0.770926	21790.2
0.77382	19963.2		0.77382	19964.6		0.77382	17057.1		0.77382	18963.7		0.77382	20412.3		0.77382	21721.8
0.776714	19944.9		0.776714	19940.2		0.776714	17030.3		0.776714	18919.9		0.776714	20354.7		0.776714	21662.4
0.779608	19934.7		0.779608	19923.4		0.779608	17012.2		0.779608	18884		0.779608	20307.1		0.779608	21614.3
0.782502	19939.9		0.782502	19921.1		0.782502	17006.7		0.782502	18861.9		0.782502	20275.2		0.782502	21581.6
0.785396	19966.8		0.785396	19939.5		0.785396	17015.9		0.785396	18856.6		0.785396	20264.3		0.785396	21569.7
0.788289	20018.3		0.788289	19981.7		0.788289	17045.1		0.788289	18873.3		0.788289	20279.7		0.788289	21584.2
0.791183	20099.2		0.791183	20052.5		0.791183	17097.9		0.791183	18917.4		0.791183	20326.7		0.791183	21629.7
0.794077	20211.1		0.794077	20154.8		0.794077	17176.4		0.794077	18991.1		0.794077	20407.8		0.794077	21709.7
0.796971	20353.5		0.796971	20288.2		0.796971	17281		0.796971	19095.4		0.796971	20523.1		0.796971	21824.8
0.799865	20524.4		0.799865	20451.1		0.799865	17410.9		0.799865	19229.8		0.799865	20671.9		0.799865	21974.8
0.799865	20524.4		0.799865	20451.1		0.799865	17410.9		0.799865	19229.8		0.799865	20671.9		0.799865	21974.8
0.802759	20720.5		0.802759	20640.4		0.802759	17563.9		0.802759	19392		0.802759	20851.5		0.802759	22157.2
0.805653	20937.4		0.805653	20851.9		0.805653	17736.9		0.805653	19578.5		0.805653	21057.5		0.805653	22368.2
0.808547	21169.4		0.808547	21080.1		0.808547	17925.6		0.808547	19784.5		0.808547	21284.7		0.808547	22602.4
0.811441	21408.6		0.811441	21317.1		0.811441	18124		0.811441	20003.2		0.811441	21525.6		0.811441	22851.8
0.814334	21646.5		0.814334	21554.6		0.814334	18324.7		0.814334	20226.3		0.814334	21770.4		0.814334	23106.3
0.817228	21873.1		0.817228	21782.2		0.817228	18519.7		0.817228	20443.7		0.817228	22008.1		0.817228	23354.6
0.820122	22079.1		0.820122	21990.6		0.820122	18700.2		0.820122	20646.7		0.820122	22228.9		0.820122	23586.1
0.823016	22259		0.823016	22173.7		0.823016	18861.8		0.823016	20826.5		0.823016	22422.9		0.823016	23790.3
0.82591	22410.6		0.82591	22328.5		0.82591	18999.5		0.82591	20981.3		0.82591	22587.7		0.82591	23965.5
0.828804	22535.9		0.828804	22457.4		0.828804	19116.9		0.828804	21107.5		0.828804	22719.9		0.828804	24108.2
0.831698	22653.8		0.831698	22576.9		0.831698	19227.9		0.831698	21224.1		0.831698	22839.8		0.831698	24240
0.834592	22826.3		0.834592	22744.6		0.834592	19372.1		0.834592	21381.8		0.834592	23002.9		0.834592	24418.6
0.837486	23130.4		0.837486	23042.1		0.837486	19619.9		0.837486	21649.5		0.837486	23287.2		0.837486	24728.8
0.840379	23590		0.840379	23502.9		0.840379	20003.7		0.840379	22071.2		0.840379	23744.2		0.840379	25227.2
0.843273	24177.6		0.843273	24100.1		0.843273	20505		0.843273	22628.1		0.843273	24355.6		0.843273	25894.2
0.846167	24851.4		0.846167	24793		0.846167	21094.8		0.846167	23284.6		0.846167	25081		0.846167	26685.1
0.849061	25575.7		0.849061	25550.6		0.849061	21752.9		0.849061	24011.1		0.849061	25880		0.849061	27553.3
0.851955	26349.6		0.851955	26372.2		0.851955	22488.9		0.851955	24820.8		0.851955	26761.6		0.851955	28502.1
0.854849	27101.8		0.854849	27173.4		0.854849	23229.2		0.854849	25648.7		0.854849	27671.2		0.854849	29481.6
0.857743	27721		0.857743	27837.2		0.857743	23864.5		0.857743	26369.7		0.857743	28474.2		0.857743	30351
0.860637	28216.7		0.860637	28374.7		0.860637	24404.5		0.860637	26981.6		0.860637	29151.2		0.860637	31079.2
0.863531	28919		0.863531	29103.8		0.863531	25090.9		0.863531	27760.8		0.863531	30008.5		0.863531	31995.2
0.866424	30253		0.866424	30477.6		0.866424	26298		0.866424	29134.1		0.866424	31520.7		0.866424	33619.8
0.869318	32041.6		0.869318	32349.7		0.869318	27939.8		0.869318	31007.6		0.869318	33584.3		0.869318	35846.9
0.872212	33718.1		0.872212	34137.6		0.872212	29539.3		0.872212	32845.4		0.872212	35607.4		0.872212	38034.6
0.875106	34865.3		0.875106	35397.1		0.875106	30691.9		0.875106	34196.2		0.875106	37092.8		0.875106	39642.1
0.878	35266.6		0.878	35850.7		0.878	31112.9		0.878	34701.7		0.878	37648		0.878	40242.9
