# Supplementary material for: Assessment of the impact of using Ammonia-Hydrogen fuel blend in a diffusion combustor: A numerical approach
Source: Research Square preprint supplement (doi:10.21203/rs.3.rs-7960312/v1), 2025-11-25
Supplement: Supplementary file 3 [file 42fe476e2cde685b8fb3591a.xlsx]

## Sheet: Axial temp distribution
SN 0			SN 0.2			SN 0.4			SN 0.6			SN 0.8			SN 1
Axial distance	temperature		Axial distance	temperature		Axial distance	temperature		Axial distance	temperature		Axial distance	temperature		Axial distance	temperature
0.00115113	311.705		0.00115113	311.549		0.00115113	310.883		0.00115113	309.357		0.00115113	309		0.00115113	309.068
0.00404502	316.745		0.00404502	316.327		0.00404502	315.656		0.00404502	313.984		0.00404502	313.639		0.00404502	313.814
0.00693891	321.948		0.00693891	321.533		0.00693891	320.844		0.00693891	319.265		0.00693891	319.079		0.00693891	319.435
0.0098328	327.363		0.0098328	327.243		0.0098328	326.541		0.0098328	325.155		0.0098328	325.289		0.0098328	325.867
0.0127267	333.085		0.0127267	333.029		0.0127267	332.382		0.0127267	331.475		0.0127267	331.962		0.0127267	332.75
0.0156206	338.856		0.0156206	338.867		0.0156206	338.313		0.0156206	338.097		0.0156206	338.993		0.0156206	339.956
0.0185145	344.699		0.0185145	344.8		0.0185145	344.354		0.0185145	344.988		0.0185145	346.319		0.0185145	347.395
0.0214084	350.603		0.0214084	350.792		0.0214084	350.522		0.0214084	352.064		0.0214084	353.785		0.0214084	354.921
0.0243023	356.549		0.0243023	356.801		0.0243023	356.812		0.0243023	359.381		0.0243023	361.366		0.0243023	362.307
0.0271961	362.432		0.0271961	362.732		0.0271961	363.097		0.0271961	366.915		0.0271961	368.796		0.0271961	369.353
0.03009	368.192		0.03009	368.541		0.03009	369.29		0.03009	374.366		0.03009	375.862		0.03009	376.024
0.0329839	373.801		0.0329839	373.889		0.0329839	375.324		0.0329839	381.396		0.0329839	382.612		0.0329839	382.262
0.0358778	379.232		0.0358778	379.025		0.0358778	381.177		0.0358778	387.928		0.0358778	388.942		0.0358778	387.94
0.0387717	384.49		0.0387717	384.32		0.0387717	386.826		0.0387717	394.28		0.0387717	394.678		0.0387717	392.876
0.0416656	389.57		0.0416656	389.495		0.0416656	392.27		0.0416656	400.377		0.0416656	399.943		0.0416656	397.453
0.0445595	394.475		0.0445595	394.482		0.0445595	397.526		0.0445595	405.978		0.0445595	404.953		0.0445595	402.27
0.0474534	399.209		0.0474534	399.273		0.0474534	402.507		0.0474534	411.289		0.0474534	409.751		0.0474534	407.06
0.0503473	403.732		0.0503473	403.879		0.0503473	407.258		0.0503473	416.495		0.0503473	414.359		0.0503473	411.508
0.0532412	408.067		0.0532412	408.322		0.0532412	411.986		0.0532412	421.692		0.0532412	418.681		0.0532412	415.797
0.056135	412.292		0.056135	412.617		0.056135	416.664		0.056135	427.106		0.056135	422.941		0.056135	419.932
0.0590289	416.425		0.0590289	416.747		0.0590289	421.219		0.0590289	433.117		0.0590289	428.007		0.0590289	423.706
0.0619228	420.47		0.0619228	420.741		0.0619228	425.437		0.0619228	440.805		0.0619228	434.45		0.0619228	427.531
0.0648167	424.426		0.0648167	424.665		0.0648167	429.591		0.0648167	452.781		0.0648167	443.157		0.0648167	431.907
0.0677106	428.299		0.0677106	428.523		0.0677106	434.069		0.0677106	473.56		0.0677106	457.034		0.0677106	436.689
0.0706045	432.09		0.0706045	432.307		0.0706045	438.639		0.0706045	511.084		0.0706045	481.608		0.0706045	442.226
0.0734984	435.8		0.0734984	436.014		0.0734984	442.991		0.0734984	579.085		0.0734984	526.462		0.0734984	450.101
0.0763923	439.425		0.0763923	439.639		0.0763923	447.381		0.0763923	694.468		0.0763923	606.804		0.0763923	462.964
0.0792862	442.983		0.0792862	443.196		0.0792862	452.09		0.0792862	860.96		0.0792862	736.191		0.0792862	485.247
0.0821801	446.506		0.0821801	446.714		0.0821801	456.803		0.0821801	1054.78		0.0821801	910.457		0.0821801	524.026
0.085074	449.982		0.085074	450.184		0.085074	461.7		0.085074	1229.85		0.085074	1100.07		0.085074	590.791
0.085074	449.982		0.085074	450.184		0.085074	461.7		0.085074	1229.85		0.085074	1100.07		0.085074	590.791
0.0879678	453.413		0.0879678	453.597		0.0879678	466.9		0.0879678	1344.06		0.0879678	1258.67		0.0879678	696.903
0.0908617	456.822		0.0908617	456.979		0.0908617	472.472		0.0908617	1384.14		0.0908617	1350.58		0.0908617	842.942
0.0937556	460.2		0.0937556	460.378		0.0937556	479.023		0.0937556	1371.84		0.0937556	1371.4		0.0937556	1013.89
0.0966495	463.561		0.0966495	463.792		0.0966495	487.32		0.0966495	1339.67		0.0966495	1349.36		0.0966495	1180.43
0.0995434	466.926		0.0995434	467.199		0.0995434	499.109		0.0995434	1304.55		0.0995434	1316.72		0.0995434	1308.4
0.102437	470.294		0.102437	470.604		0.102437	518.499		0.102437	1272.32		0.102437	1286.3		0.102437	1377.28
0.105331	473.66		0.105331	473.999		0.105331	552.221		0.105331	1244.42		0.105331	1261.02		0.105331	1390.41
0.108225	477.012		0.108225	477.413		0.108225	609.137		0.108225	1220.58		0.108225	1240.44		0.108225	1371.85
0.111119	480.369		0.111119	480.87		0.111119	697.137		0.111119	1200.41		0.111119	1223.94		0.111119	1345.12
0.114013	483.746		0.114013	484.357		0.114013	817.668		0.114013	1183.49		0.114013	1210.76		0.114013	1319.59
0.116907	487.15		0.116907	487.855		0.116907	963.589		0.116907	1169.39		0.116907	1200.18		0.116907	1297.93
0.119801	490.596		0.119801	491.384		0.119801	1119.42		0.119801	1157.68		0.119801	1191.76		0.119801	1280.29
0.122695	494.06		0.122695	494.991		0.122695	1264.16		0.122695	1148.02		0.122695	1185.18		0.122695	1266.33
0.125588	497.56		0.125588	498.673		0.125588	1377.97		0.125588	1140.11		0.125588	1180.19		0.125588	1255.32
0.128482	501.092		0.128482	502.419		0.128482	1449.24		0.128482	1133.72		0.128482	1176.39		0.128482	1246.73
0.131376	504.658		0.131376	506.221		0.131376	1475.29		0.131376	1128.64		0.131376	1173.5		0.131376	1240.13
0.13427	508.286		0.13427	510.099		0.13427	1463.61		0.13427	1124.63		0.13427	1171.3		0.13427	1234.99
0.137164	511.974		0.137164	514.067		0.137164	1430.15		0.137164	1121.47		0.137164	1169.6		0.137164	1230.95
0.140058	515.717		0.140058	518.123		0.140058	1388.15		0.140058	1118.98		0.140058	1168.29		0.140058	1227.79
0.142952	519.526		0.142952	522.287		0.142952	1344.71		0.142952	1117.01		0.142952	1167.25		0.142952	1225.39
0.145846	523.418		0.145846	526.562		0.145846	1303.83		0.145846	1115.46		0.145846	1166.41		0.145846	1223.54
0.14874	527.396		0.14874	530.949		0.14874	1267.24		0.14874	1114.27		0.14874	1165.7		0.14874	1222.09
0.151633	531.44		0.151633	535.468		0.151633	1234.85		0.151633	1113.33		0.151633	1165.1		0.151633	1220.93
0.154527	535.562		0.154527	540.117		0.154527	1206.4		0.154527	1112.58		0.154527	1164.57		0.154527	1219.99
0.157421	539.783		0.157421	544.895		0.157421	1181.76		0.157421	1111.96		0.157421	1164.1		0.157421	1219.19
0.160315	544.094		0.160315	549.803		0.160315	1160.75		0.160315	1111.45		0.160315	1163.67		0.160315	1218.49
0.163209	548.49		0.163209	554.861		0.163209	1143.08		0.163209	1111.01		0.163209	1163.27		0.163209	1217.86
0.166103	552.978		0.166103	560.089		0.166103	1128.24		0.166103	1110.61		0.166103	1162.89		0.166103	1217.28
0.166103	552.978		0.166103	560.089		0.166103	1128.24		0.166103	1110.61		0.166103	1162.89		0.166103	1217.28
0.168997	557.578		0.168997	565.491		0.168997	1115.83		0.168997	1110.26		0.168997	1162.52		0.168997	1216.74
0.171891	562.299		0.171891	571.073		0.171891	1105.47		0.171891	1109.93		0.171891	1162.15		0.171891	1216.22
0.174785	567.131		0.174785	576.831		0.174785	1096.88		0.174785	1109.62		0.174785	1161.79		0.174785	1215.72
0.177678	572.08		0.177678	582.767		0.177678	1089.85		0.177678	1109.31		0.177678	1161.43		0.177678	1215.23
0.180572	577.148		0.180572	588.863		0.180572	1084.11		0.180572	1109.02		0.180572	1161.07		0.180572	1214.75
0.183466	582.33		0.183466	595.134		0.183466	1079.42		0.183466	1108.73		0.183466	1160.71		0.183466	1214.27
0.18636	587.62		0.18636	601.58		0.18636	1075.61		0.18636	1108.43		0.18636	1160.34		0.18636	1213.79
0.189254	593.034		0.189254	608.036		0.189254	1072.52		0.189254	1108.14		0.189254	1159.97		0.189254	1213.3
0.192148	598.56		0.192148	614.668		0.192148	1070.04		0.192148	1107.85		0.192148	1159.6		0.192148	1212.82
0.195042	604.199		0.195042	621.687		0.195042	1068.06		0.195042	1107.55		0.195042	1159.22		0.195042	1212.33
0.197936	609.952		0.197936	628.926		0.197936	1066.48		0.197936	1107.25		0.197936	1158.84		0.197936	1211.84
0.20083	615.633		0.20083	636.323		0.20083	1065.21		0.20083	1106.95		0.20083	1158.45		0.20083	1211.34
0.203723	621.426		0.203723	643.883		0.203723	1064.18		0.203723	1106.64		0.203723	1158.06		0.203723	1210.83
0.206617	627.505		0.206617	651.59		0.206617	1063.35		0.206617	1106.33		0.206617	1157.66		0.206617	1210.32
0.209511	633.714		0.209511	659.417		0.209511	1062.67		0.209511	1106.02		0.209511	1157.26		0.209511	1209.8
0.212405	640.016		0.212405	667.305		0.212405	1062.09		0.212405	1105.7		0.212405	1156.85		0.212405	1209.28
0.215299	646.396		0.215299	675.345		0.215299	1061.6		0.215299	1105.38		0.215299	1156.44		0.215299	1208.75
0.215299	646.396		0.215299	675.345		0.215299	1061.6		0.215299	1105.38		0.215299	1156.44		0.215299	1208.75
0.218193	652.892		0.218193	683.616		0.218193	1061.17		0.218193	1105.05		0.218193	1156.02		0.218193	1208.21
0.221087	659.471		0.221087	692.051		0.221087	1060.78		0.221087	1104.72		0.221087	1155.59		0.221087	1207.67
0.223981	666.121		0.223981	700.644		0.223981	1060.43		0.223981	1104.39		0.223981	1155.17		0.223981	1207.11
0.226875	672.866		0.226875	709.375		0.226875	1060.1		0.226875	1104.05		0.226875	1154.73		0.226875	1206.56
0.229768	679.673		0.229768	718.238		0.229768	1059.79		0.229768	1103.71		0.229768	1154.29		0.229768	1205.99
0.232662	686.541		0.232662	727.246		0.232662	1059.49		0.232662	1103.36		0.232662	1153.85		0.232662	1205.42
0.235556	693.49		0.235556	736.359		0.235556	1059.2		0.235556	1103.01		0.235556	1153.4		0.235556	1204.84
0.23845	700.481		0.23845	745.589		0.23845	1058.91		0.23845	1102.66		0.23845	1152.95		0.23845	1204.26
0.241344	707.486		0.241344	754.979		0.241344	1058.63		0.241344	1102.3		0.241344	1152.49		0.241344	1203.67
0.244238	714.527		0.244238	764.524		0.244238	1058.34		0.244238	1101.94		0.244238	1152.03		0.244238	1203.07
0.247132	721.641		0.247132	774.214		0.247132	1058.06		0.247132	1101.58		0.247132	1151.56		0.247132	1202.47
0.250026	728.823		0.250026	784.047		0.250026	1057.77		0.250026	1101.21		0.250026	1151.09		0.250026	1201.86
0.25292	736.07		0.25292	794.02		0.25292	1057.48		0.25292	1100.84		0.25292	1150.62		0.25292	1201.25
0.255814	743.4		0.255814	804.133		0.255814	1057.19		0.255814	1100.47		0.255814	1150.14		0.255814	1200.63
0.258707	750.816		0.258707	814.386		0.258707	1056.9		0.258707	1100.09		0.258707	1149.65		0.258707	1200
0.261601	758.298		0.261601	824.781		0.261601	1056.61		0.261601	1099.71		0.261601	1149.16		0.261601	1199.37
0.264495	765.846		0.264495	835.325		0.264495	1056.31		0.264495	1099.33		0.264495	1148.67		0.264495	1198.73
0.267389	773.481		0.267389	846.007		0.267389	1056.01		0.267389	1098.94		0.267389	1148.17		0.267389	1198.09
0.270283	781.202		0.270283	856.833		0.270283	1055.71		0.270283	1098.55		0.270283	1147.67		0.270283	1197.44
0.273177	789.018		0.273177	867.826		0.273177	1055.41		0.273177	1098.16		0.273177	1147.17		0.273177	1196.78
0.276071	796.913		0.276071	879.027		0.276071	1055.1		0.276071	1097.77		0.276071	1146.66		0.276071	1196.12
0.278965	804.875		0.278965	890.447		0.278965	1054.79		0.278965	1097.37		0.278965	1146.14		0.278965	1195.45
0.281859	812.931		0.281859	902.062		0.281859	1054.48		0.281859	1096.97		0.281859	1145.63		0.281859	1194.78
0.284752	821.1		0.284752	913.867		0.284752	1054.16		0.284752	1096.57		0.284752	1145.11		0.284752	1194.11
0.287646	829.394		0.287646	925.862		0.287646	1053.84		0.287646	1096.16		0.287646	1144.58		0.287646	1193.42
0.29054	837.798		0.29054	938.068		0.29054	1053.52		0.29054	1095.75		0.29054	1144.05		0.29054	1192.74
0.293434	846.278		0.293434	950.512		0.293434	1053.2		0.293434	1095.34		0.293434	1143.52		0.293434	1192.04
0.296328	854.862		0.296328	963.205		0.296328	1052.88		0.296328	1094.93		0.296328	1142.98		0.296328	1191.35
0.299222	863.599		0.299222	976.103		0.299222	1052.55		0.299222	1094.51		0.299222	1142.44		0.299222	1190.64
0.302116	872.486		0.302116	989.199		0.302116	1052.22		0.302116	1094.09		0.302116	1141.9		0.302116	1189.94
0.30501	881.548		0.30501	1002.54		0.30501	1051.89		0.30501	1093.67		0.30501	1141.35		0.30501	1189.23
0.307904	890.804		0.307904	1016.23		0.307904	1051.56		0.307904	1093.25		0.307904	1140.8		0.307904	1188.51
0.310797	900.262		0.310797	1030.25		0.310797	1051.23		0.310797	1092.82		0.310797	1140.25		0.310797	1187.79
0.313691	909.931		0.313691	1044.46		0.313691	1050.89		0.313691	1092.4		0.313691	1139.69		0.313691	1187.06
0.313691	909.931		0.313691	1044.46		0.313691	1050.89		0.313691	1092.4		0.313691	1139.69		0.313691	1187.06
0.316585	919.81		0.316585	1058.86		0.316585	1050.55		0.316585	1091.97		0.316585	1139.13		0.316585	1186.33
0.319479	929.905		0.319479	1073.5		0.319479	1050.21		0.319479	1091.53		0.319479	1138.56		0.319479	1185.6
0.322373	940.225		0.322373	1088.4		0.322373	1049.87		0.322373	1091.1		0.322373	1138		0.322373	1184.86
0.325267	950.784		0.325267	1103.6		0.325267	1049.53		0.325267	1090.66		0.325267	1137.42		0.325267	1184.12
0.328161	961.595		0.328161	1119.09		0.328161	1049.19		0.328161	1090.22		0.328161	1136.85		0.328161	1183.37
0.331055	972.714		0.331055	1134.85		0.331055	1048.84		0.331055	1089.78		0.331055	1136.27		0.331055	1182.62
0.333949	984.13		0.333949	1150.89		0.333949	1048.49		0.333949	1089.34		0.333949	1135.69		0.333949	1181.87
0.336842	995.846		0.336842	1167.25		0.336842	1048.14		0.336842	1088.89		0.336842	1135.11		0.336842	1181.11
0.339736	1007.92		0.339736	1183.89		0.339736	1047.79		0.339736	1088.45		0.339736	1134.52		0.339736	1180.35
0.34263	1020.32		0.34263	1200.77		0.34263	1047.44		0.34263	1088		0.34263	1133.93		0.34263	1179.59
0.345524	1033.09		0.345524	1217.93		0.345524	1047.09		0.345524	1087.55		0.345524	1133.34		0.345524	1178.82
0.348418	1046.19		0.348418	1235.43		0.348418	1046.74		0.348418	1087.09		0.348418	1132.74		0.348418	1178.05
0.351312	1059.65		0.351312	1253.38		0.351312	1046.38		0.351312	1086.64		0.351312	1132.14		0.351312	1177.27
0.354206	1073.55		0.354206	1271.61		0.354206	1046.03		0.354206	1086.18		0.354206	1131.54		0.354206	1176.5
0.3571	1087.84		0.3571	1289.98		0.3571	1045.67		0.3571	1085.72		0.3571	1130.94		0.3571	1175.72
0.359994	1102.51		0.359994	1308.49		0.359994	1045.31		0.359994	1085.26		0.359994	1130.33		0.359994	1174.93
0.362887	1117.66		0.362887	1327.16		0.362887	1044.95		0.362887	1084.79		0.362887	1129.72		0.362887	1174.15
0.365781	1133.4		0.365781	1346.05		0.365781	1044.59		0.365781	1084.33		0.365781	1129.11		0.365781	1173.36
0.368675	1149.71		0.368675	1365.2		0.368675	1044.23		0.368675	1083.86		0.368675	1128.49		0.368675	1172.57
0.371569	1166.45		0.371569	1384.56		0.371569	1043.87		0.371569	1083.39		0.371569	1127.88		0.371569	1171.77
0.374463	1183.56		0.374463	1404.34		0.374463	1043.51		0.374463	1082.92		0.374463	1127.26		0.374463	1170.98
0.377357	1201.11		0.377357	1424.37		0.377357	1043.14		0.377357	1082.45		0.377357	1126.63		0.377357	1170.18
0.380251	1219.14		0.380251	1444.33		0.380251	1042.78		0.380251	1081.98		0.380251	1126.01		0.380251	1169.38
0.383145	1237.63		0.383145	1464.4		0.383145	1042.41		0.383145	1081.5		0.383145	1125.38		0.383145	1168.57
0.386039	1256.63		0.386039	1484.45		0.386039	1042.05		0.386039	1081.02		0.386039	1124.75		0.386039	1167.77
0.388932	1276.13		0.388932	1504.39		0.388932	1041.68		0.388932	1080.54		0.388932	1124.12		0.388932	1166.96
0.391826	1296.1		0.391826	1524.32		0.391826	1041.31		0.391826	1080.06		0.391826	1123.49		0.391826	1166.15
0.39472	1316.49		0.39472	1544.19		0.39472	1040.94		0.39472	1079.58		0.39472	1122.85		0.39472	1165.34
0.397614	1337.31		0.397614	1563.98		0.397614	1040.57		0.397614	1079.09		0.397614	1122.21		0.397614	1164.53
0.400508	1358.53		0.400508	1583.63		0.400508	1040.2		0.400508	1078.61		0.400508	1121.58		0.400508	1163.72
0.403402	1380.05		0.403402	1603.05		0.403402	1039.83		0.403402	1078.12		0.403402	1120.93		0.403402	1162.9
0.403402	1380.05		0.403402	1603.05		0.403402	1039.83		0.403402	1078.12		0.403402	1120.93		0.403402	1162.9
0.406296	1401.83		0.406296	1622.15		0.406296	1039.46		0.406296	1077.63		0.406296	1120.29		0.406296	1162.09
0.40919	1423.83		0.40919	1640.99		0.40919	1039.09		0.40919	1077.14		0.40919	1119.65		0.40919	1161.27
0.412084	1446.07		0.412084	1659.35		0.412084	1038.71		0.412084	1076.65		0.412084	1119		0.412084	1160.45
0.414977	1468.39		0.414977	1677.09		0.414977	1038.34		0.414977	1076.15		0.414977	1118.35		0.414977	1159.63
0.417871	1490.54		0.417871	1694.21		0.417871	1037.96		0.417871	1075.66		0.417871	1117.7		0.417871	1158.81
0.420765	1512.48		0.420765	1710.26		0.420765	1037.59		0.420765	1075.16		0.420765	1117.05		0.420765	1157.99
0.423659	1534.11		0.423659	1725.14		0.423659	1037.21		0.423659	1074.66		0.423659	1116.4		0.423659	1157.17
0.426553	1555.33		0.426553	1738.48		0.426553	1036.84		0.426553	1074.16		0.426553	1115.75		0.426553	1156.35
0.429447	1576.16		0.429447	1749.71		0.429447	1036.46		0.429447	1073.66		0.429447	1115.09		0.429447	1155.53
0.432341	1596.3		0.432341	1757.9		0.432341	1036.08		0.432341	1073.16		0.432341	1114.44		0.432341	1154.71
0.435235	1615.39		0.435235	1763.22		0.435235	1035.7		0.435235	1072.66		0.435235	1113.78		0.435235	1153.89
0.438129	1633.44		0.438129	1766.66		0.438129	1035.32		0.438129	1072.15		0.438129	1113.12		0.438129	1153.06
0.441023	1650.13		0.441023	1767.92		0.441023	1034.94		0.441023	1071.65		0.441023	1112.46		0.441023	1152.24
0.443916	1664.87		0.443916	1767.05		0.443916	1034.56		0.443916	1071.14		0.443916	1111.8		0.443916	1151.42
0.44681	1677.1		0.44681	1764.31		0.44681	1034.18		0.44681	1070.63		0.44681	1111.14		0.44681	1150.6
0.449704	1685.81		0.449704	1759.61		0.449704	1033.8		0.449704	1070.12		0.449704	1110.48		0.449704	1149.77
0.452598	1691.57		0.452598	1753.39		0.452598	1033.41		0.452598	1069.61		0.452598	1109.82		0.452598	1148.95
0.455492	1695.32		0.455492	1745.98		0.455492	1033.03		0.455492	1069.1		0.455492	1109.16		0.455492	1148.13
0.458386	1696.69		0.458386	1737.33		0.458386	1032.65		0.458386	1068.59		0.458386	1108.5		0.458386	1147.31
0.46128	1695.9		0.46128	1727.57		0.46128	1032.26		0.46128	1068.08		0.46128	1107.83		0.46128	1146.49
0.464174	1693.15		0.464174	1716.95		0.464174	1031.88		0.464174	1067.56		0.464174	1107.17		0.464174	1145.67
0.467068	1688.67		0.467068	1705.67		0.467068	1031.49		0.467068	1067.05		0.467068	1106.5		0.467068	1144.85
0.469961	1682.58		0.469961	1693.78		0.469961	1031.11		0.469961	1066.53		0.469961	1105.84		0.469961	1144.03
0.472855	1675.01		0.472855	1681.42		0.472855	1030.72		0.472855	1066.02		0.472855	1105.17		0.472855	1143.22
0.475749	1666.44		0.475749	1668.52		0.475749	1030.33		0.475749	1065.5		0.475749	1104.51		0.475749	1142.4
0.478643	1656.89		0.478643	1655.07		0.478643	1029.94		0.478643	1064.98		0.478643	1103.84		0.478643	1141.58
0.481537	1646.36		0.481537	1641.31		0.481537	1029.56		0.481537	1064.46		0.481537	1103.18		0.481537	1140.77
0.484431	1635.15		0.484431	1627.33		0.484431	1029.17		0.484431	1063.94		0.484431	1102.51		0.484431	1139.96
0.487325	1623.3		0.487325	1613.26		0.487325	1028.78		0.487325	1063.42		0.487325	1101.85		0.487325	1139.14
0.490219	1610.87		0.490219	1599.08		0.490219	1028.39		0.490219	1062.9		0.490219	1101.18		0.490219	1138.33
0.493113	1598.01		0.493113	1584.81		0.493113	1028		0.493113	1062.38		0.493113	1100.52		0.493113	1137.52
0.496006	1584.83		0.496006	1570.54		0.496006	1027.61		0.496006	1061.86		0.496006	1099.85		0.496006	1136.72
0.4989	1571.42		0.4989	1556.3		0.4989	1027.22		0.4989	1061.34		0.4989	1099.19		0.4989	1135.91
0.501794	1557.86		0.501794	1542.12		0.501794	1026.82		0.501794	1060.81		0.501794	1098.52		0.501794	1135.11
0.504688	1544.32		0.504688	1528.12		0.504688	1026.43		0.504688	1060.29		0.504688	1097.86		0.504688	1134.3
0.507582	1530.66		0.507582	1514.34		0.507582	1026.04		0.507582	1059.77		0.507582	1097.2		0.507582	1133.5
0.510476	1516.85		0.510476	1500.69		0.510476	1025.65		0.510476	1059.24		0.510476	1096.53		0.510476	1132.7
0.51337	1503.1		0.51337	1487.17		0.51337	1025.25		0.51337	1058.72		0.51337	1095.87		0.51337	1131.9
0.516264	1489.45		0.516264	1473.88		0.516264	1024.86		0.516264	1058.19		0.516264	1095.21		0.516264	1131.11
0.519158	1475.92		0.519158	1460.83		0.519158	1024.47		0.519158	1057.67		0.519158	1094.55		0.519158	1130.31
0.522051	1462.56		0.522051	1448.05		0.522051	1024.07		0.522051	1057.14		0.522051	1093.89		0.522051	1129.52
0.524945	1449.28		0.524945	1435.53		0.524945	1023.68		0.524945	1056.62		0.524945	1093.23		0.524945	1128.73
0.524945	1449.28		0.524945	1435.53		0.524945	1023.68		0.524945	1056.62		0.524945	1093.23		0.524945	1128.73
0.527839	1436.13		0.527839	1423.27		0.527839	1023.28		0.527839	1056.09		0.527839	1092.57		0.527839	1127.94
0.530733	1423.22		0.530733	1411.29		0.530733	1022.88		0.530733	1055.57		0.530733	1091.92		0.530733	1127.16
0.533627	1410.55		0.533627	1399.58		0.533627	1022.49		0.533627	1055.04		0.533627	1091.26		0.533627	1126.37
0.536521	1398.09		0.536521	1388.16		0.536521	1022.09		0.536521	1054.52		0.536521	1090.6		0.536521	1125.59
0.539415	1385.9		0.539415	1377.02		0.539415	1021.7		0.539415	1053.99		0.539415	1089.95		0.539415	1124.81
0.542309	1374		0.542309	1366.17		0.542309	1021.3		0.542309	1053.47		0.542309	1089.3		0.542309	1124.03
0.545203	1362.35		0.545203	1355.61		0.545203	1020.9		0.545203	1052.94		0.545203	1088.65		0.545203	1123.26
0.548096	1350.97		0.548096	1345.34		0.548096	1020.5		0.548096	1052.42		0.548096	1088		0.548096	1122.49
0.55099	1339.87		0.55099	1335.34		0.55099	1020.11		0.55099	1051.89		0.55099	1087.35		0.55099	1121.72
0.553884	1328.99		0.553884	1325.62		0.553884	1019.71		0.553884	1051.37		0.553884	1086.7		0.553884	1120.95
0.556778	1318.39		0.556778	1316.19		0.556778	1019.31		0.556778	1050.84		0.556778	1086.05		0.556778	1120.18
0.559672	1308.11		0.559672	1307.05		0.559672	1018.91		0.559672	1050.32		0.559672	1085.41		0.559672	1119.42
0.562566	1298.12		0.562566	1298.18		0.562566	1018.51		0.562566	1049.8		0.562566	1084.76		0.562566	1118.66
0.56546	1288.37		0.56546	1289.56		0.56546	1018.12		0.56546	1049.27		0.56546	1084.12		0.56546	1117.9
0.568354	1278.89		0.568354	1281.21		0.568354	1017.72		0.568354	1048.75		0.568354	1083.48		0.568354	1117.15
0.571248	1269.72		0.571248	1273.14		0.571248	1017.32		0.571248	1048.23		0.571248	1082.84		0.571248	1116.39
0.574142	1260.84		0.574142	1265.32		0.574142	1016.92		0.574142	1047.71		0.574142	1082.21		0.574142	1115.65
0.577035	1252.18		0.577035	1257.74		0.577035	1016.52		0.577035	1047.19		0.577035	1081.57		0.577035	1114.9
0.579929	1243.78		0.579929	1250.37		0.579929	1016.12		0.579929	1046.67		0.579929	1080.94		0.579929	1114.15
0.582823	1235.69		0.582823	1243.24		0.582823	1015.72		0.582823	1046.15		0.582823	1080.31		0.582823	1113.41
0.585717	1227.88		0.585717	1236.36		0.585717	1015.32		0.585717	1045.63		0.585717	1079.68		0.585717	1112.67
0.588611	1220.3		0.588611	1229.71		0.588611	1014.92		0.588611	1045.11		0.588611	1079.05		0.588611	1111.94
0.591505	1212.93		0.591505	1223.27		0.591505	1014.53		0.591505	1044.6		0.591505	1078.42		0.591505	1111.21
0.594399	1205.78		0.594399	1217.02		0.594399	1014.13		0.594399	1044.08		0.594399	1077.8		0.594399	1110.48
0.597293	1198.9		0.597293	1210.95		0.597293	1013.73		0.597293	1043.56		0.597293	1077.18		0.597293	1109.75
0.600186	1192.28		0.600186	1205.08		0.600186	1013.33		0.600186	1043.05		0.600186	1076.56		0.600186	1109.03
0.60308	1185.88		0.60308	1199.42		0.60308	1012.93		0.60308	1042.54		0.60308	1075.94		0.60308	1108.3
0.605974	1179.68		0.605974	1193.96		0.605974	1012.53		0.605974	1042.02		0.605974	1075.32		0.605974	1107.59
0.608868	1173.66		0.608868	1188.7		0.608868	1012.13		0.608868	1041.51		0.608868	1074.71		0.608868	1106.87
0.611762	1167.81		0.611762	1183.6		0.611762	1011.74		0.611762	1041		0.611762	1074.1		0.611762	1106.16
0.614656	1162.16		0.614656	1178.67		0.614656	1011.34		0.614656	1040.49		0.614656	1073.49		0.614656	1105.45
0.61755	1156.75		0.61755	1173.88		0.61755	1010.94		0.61755	1039.98		0.61755	1072.88		0.61755	1104.74
0.620444	1151.54		0.620444	1169.22		0.620444	1010.54		0.620444	1039.48		0.620444	1072.27		0.620444	1104.04
0.623338	1146.52		0.623338	1164.69		0.623338	1010.15		0.623338	1038.97		0.623338	1071.67		0.623338	1103.34
0.626231	1141.67		0.626231	1160.31		0.626231	1009.75		0.626231	1038.47		0.626231	1071.07		0.626231	1102.64
0.629125	1136.98		0.629125	1156.09		0.629125	1009.35		0.629125	1037.96		0.629125	1070.47		0.629125	1101.95
0.632019	1132.42		0.632019	1152.01		0.632019	1008.96		0.632019	1037.46		0.632019	1069.88		0.632019	1101.26
0.634913	1127.97		0.634913	1148.07		0.634913	1008.56		0.634913	1036.96		0.634913	1069.28		0.634913	1100.57
0.637807	1123.65		0.637807	1144.24		0.637807	1008.17		0.637807	1036.46		0.637807	1068.69		0.637807	1099.89
0.640701	1119.49		0.640701	1140.53		0.640701	1007.77		0.640701	1035.96		0.640701	1068.1		0.640701	1099.21
0.643595	1115.46		0.643595	1136.9		0.643595	1007.38		0.643595	1035.47		0.643595	1067.52		0.643595	1098.53
0.643595	1115.46		0.643595	1136.9		0.643595	1007.38		0.643595	1035.47		0.643595	1067.52		0.643595	1098.53
0.646489	1111.57		0.646489	1133.36		0.646489	1006.98		0.646489	1034.97		0.646489	1066.93		0.646489	1097.85
0.649383	1107.8		0.649383	1129.93		0.649383	1006.59		0.649383	1034.48		0.649383	1066.35		0.649383	1097.18
0.652277	1104.15		0.652277	1126.59		0.652277	1006.2		0.652277	1033.99		0.652277	1065.77		0.652277	1096.51
0.65517	1100.61		0.65517	1123.34		0.65517	1005.81		0.65517	1033.5		0.65517	1065.19		0.65517	1095.84
0.658064	1097.19		0.658064	1120.19		0.658064	1005.41		0.658064	1033.01		0.658064	1064.62		0.658064	1095.18
0.660958	1093.87		0.660958	1117.13		0.660958	1005.02		0.660958	1032.52		0.660958	1064.04		0.660958	1094.52
0.663852	1090.66		0.663852	1114.15		0.663852	1004.63		0.663852	1032.04		0.663852	1063.47		0.663852	1093.86
0.666746	1087.56		0.666746	1111.27		0.666746	1004.25		0.666746	1031.56		0.666746	1062.91		0.666746	1093.2
0.66964	1084.55		0.66964	1108.46		0.66964	1003.86		0.66964	1031.07		0.66964	1062.34		0.66964	1092.55
0.672534	1081.65		0.672534	1105.73		0.672534	1003.47		0.672534	1030.59		0.672534	1061.78		0.672534	1091.9
0.675428	1078.84		0.675428	1103.08		0.675428	1003.08		0.675428	1030.12		0.675428	1061.22		0.675428	1091.25
0.678322	1076.12		0.678322	1100.5		0.678322	1002.7		0.678322	1029.64		0.678322	1060.66		0.678322	1090.6
0.681215	1073.49		0.681215	1097.99		0.681215	1002.31		0.681215	1029.16		0.681215	1060.1		0.681215	1089.96
0.684109	1070.95		0.684109	1095.55		0.684109	1001.93		0.684109	1028.69		0.684109	1059.55		0.684109	1089.32
0.687003	1068.49		0.687003	1093.17		0.687003	1001.55		0.687003	1028.22		0.687003	1058.99		0.687003	1088.68
0.689897	1066.1		0.689897	1090.84		0.689897	1001.16		0.689897	1027.75		0.689897	1058.44		0.689897	1088.05
0.692791	1063.79		0.692791	1088.58		0.692791	1000.78		0.692791	1027.28		0.692791	1057.89		0.692791	1087.41
0.695685	1061.54		0.695685	1086.37		0.695685	1000.4		0.695685	1026.81		0.695685	1057.35		0.695685	1086.78
0.698579	1059.36		0.698579	1084.21		0.698579	1000.02		0.698579	1026.35		0.698579	1056.8		0.698579	1086.15
0.701473	1057.25		0.701473	1082.11		0.701473	999.646		0.701473	1025.88		0.701473	1056.26		0.701473	1085.52
0.704367	1055.19		0.704367	1080.05		0.704367	999.268		0.704367	1025.42		0.704367	1055.72		0.704367	1084.89
0.70726	1053.19		0.70726	1078.03		0.70726	998.891		0.70726	1024.96		0.70726	1055.17		0.70726	1084.26
0.710154	1051.25		0.710154	1076.06		0.710154	998.516		0.710154	1024.5		0.710154	1054.63		0.710154	1083.63
0.713048	1049.35		0.713048	1074.13		0.713048	998.141		0.713048	1024.04		0.713048	1054.09		0.713048	1083
0.715942	1047.51		0.715942	1072.25		0.715942	997.766		0.715942	1023.58		0.715942	1053.55		0.715942	1082.38
0.715942	1047.51		0.715942	1072.25		0.715942	997.766		0.715942	1023.58		0.715942	1053.55		0.715942	1082.38
0.718836	1045.7		0.718836	1070.41		0.718836	997.393		0.718836	1023.12		0.718836	1053.01		0.718836	1081.75
0.72173	1043.95		0.72173	1068.61		0.72173	997.02		0.72173	1022.66		0.72173	1052.47		0.72173	1081.12
0.724624	1042.24		0.724624	1066.84		0.724624	996.647		0.724624	1022.21		0.724624	1051.93		0.724624	1080.49
0.727518	1040.57		0.727518	1065.11		0.727518	996.275		0.727518	1021.75		0.727518	1051.39		0.727518	1079.86
0.730412	1038.94		0.730412	1063.41		0.730412	995.903		0.730412	1021.29		0.730412	1050.85		0.730412	1079.23
0.733305	1037.35		0.733305	1061.75		0.733305	995.531		0.733305	1020.83		0.733305	1050.31		0.733305	1078.59
0.736199	1035.8		0.736199	1060.12		0.736199	995.158		0.736199	1020.37		0.736199	1049.76		0.736199	1077.95
0.739093	1034.28		0.739093	1058.51		0.739093	994.784		0.739093	1019.91		0.739093	1049.21		0.739093	1077.3
0.741987	1032.79		0.741987	1056.93		0.741987	994.41		0.741987	1019.44		0.741987	1048.65		0.741987	1076.65
0.744881	1031.33		0.744881	1055.37		0.744881	994.034		0.744881	1018.97		0.744881	1048.09		0.744881	1075.99
0.747775	1029.9		0.747775	1053.84		0.747775	993.656		0.747775	1018.5		0.747775	1047.52		0.747775	1075.32
0.750669	1028.49		0.750669	1052.32		0.750669	993.275		0.750669	1018.02		0.750669	1046.95		0.750669	1074.64
0.753563	1027.1		0.753563	1050.82		0.753563	992.89		0.753563	1017.54		0.753563	1046.36		0.753563	1073.95
0.756457	1025.73		0.756457	1049.33		0.756457	992.501		0.756457	1017.05		0.756457	1045.77		0.756457	1073.24
0.75935	1024.38		0.75935	1047.85		0.75935	992.106		0.75935	1016.54		0.75935	1045.16		0.75935	1072.52
0.762244	1023.03		0.762244	1046.38		0.762244	991.704		0.762244	1016.03		0.762244	1044.53		0.762244	1071.78
0.765138	1021.7		0.765138	1044.9		0.765138	991.295		0.765138	1015.5		0.765138	1043.89		0.765138	1071.02
0.768032	1020.37		0.768032	1043.42		0.768032	990.875		0.768032	1014.96		0.768032	1043.23		0.768032	1070.24
0.770926	1019.04		0.770926	1041.94		0.770926	990.444		0.770926	1014.41		0.770926	1042.55		0.770926	1069.43
0.77382	1017.7		0.77382	1040.44		0.77382	990.001		0.77382	1013.83		0.77382	1041.84		0.77382	1068.59
0.776714	1016.36		0.776714	1038.93		0.776714	989.542		0.776714	1013.23		0.776714	1041.11		0.776714	1067.71
0.779608	1015.01		0.779608	1037.39		0.779608	989.068		0.779608	1012.62		0.779608	1040.35		0.779608	1066.8
0.782502	1013.64		0.782502	1035.83		0.782502	988.576		0.782502	1011.98		0.782502	1039.55		0.782502	1065.86
0.785396	1012.26		0.785396	1034.24		0.785396	988.065		0.785396	1011.31		0.785396	1038.73		0.785396	1064.87
0.788289	1010.85		0.788289	1032.62		0.788289	987.534		0.788289	1010.62		0.788289	1037.87		0.788289	1063.84
0.791183	1009.42		0.791183	1030.97		0.791183	986.982		0.791183	1009.9		0.791183	1036.97		0.791183	1062.77
0.794077	1007.96		0.794077	1029.29		0.794077	986.407		0.794077	1009.15		0.794077	1036.04		0.794077	1061.65
0.796971	1006.49		0.796971	1027.59		0.796971	985.808		0.796971	1008.37		0.796971	1035.07		0.796971	1060.49
0.799865	1004.99		0.799865	1025.87		0.799865	985.183		0.799865	1007.55		0.799865	1034.05		0.799865	1059.27
0.799865	1004.99		0.799865	1025.87		0.799865	985.183		0.799865	1007.55		0.799865	1034.05		0.799865	1059.27
0.802759	1003.49		0.802759	1024.13		0.802759	984.531		0.802759	1006.71		0.802759	1033		0.802759	1058.01
0.805653	1001.97		0.805653	1022.39		0.805653	983.849		0.805653	1005.83		0.805653	1031.9		0.805653	1056.69
0.808547	1000.44		0.808547	1020.63		0.808547	983.135		0.808547	1004.9		0.808547	1030.75		0.808547	1055.32
0.811441	998.918		0.811441	1018.87		0.811441	982.385		0.811441	1003.94		0.811441	1029.56		0.811441	1053.9
0.814334	997.391		0.814334	1017.11		0.814334	981.597		0.814334	1002.94		0.814334	1028.32		0.814334	1052.43
0.817228	995.867		0.817228	1015.34		0.817228	980.768		0.817228	1001.88		0.817228	1027.02		0.817228	1050.9
0.820122	994.344		0.820122	1013.57		0.820122	979.893		0.820122	1000.78		0.820122	1025.68		0.820122	1049.31
0.823016	992.825		0.823016	1011.78		0.823016	978.97		0.823016	999.633		0.823016	1024.28		0.823016	1047.67
0.82591	991.307		0.82591	1010		0.82591	977.995		0.82591	998.427		0.82591	1022.82		0.82591	1045.97
0.828804	989.793		0.828804	1008.2		0.828804	976.964		0.828804	997.166		0.828804	1021.31		0.828804	1044.22
0.831698	988.28		0.831698	1006.39		0.831698	975.875		0.831698	995.848		0.831698	1019.75		0.831698	1042.41
0.834592	986.771		0.834592	1004.58		0.834592	974.726		0.834592	994.472		0.834592	1018.13		0.834592	1040.56
0.837486	985.266		0.837486	1002.76		0.837486	973.514		0.837486	993.039		0.837486	1016.46		0.837486	1038.65
0.840379	983.767		0.840379	1000.94		0.840379	972.241		0.840379	991.55		0.840379	1014.74		0.840379	1036.71
0.843273	982.276		0.843273	999.113		0.843273	970.906		0.843273	990.008		0.843273	1012.97		0.843273	1034.73
0.846167	980.799		0.846167	997.295		0.846167	969.512		0.846167	988.418		0.846167	1011.17		0.846167	1032.72
0.849061	979.338		0.849061	995.487		0.849061	968.064		0.849061	986.784		0.849061	1009.34		0.849061	1030.69
0.851955	977.9		0.851955	993.697		0.851955	966.568		0.851955	985.115		0.851955	1007.49		0.851955	1028.65
0.854849	976.49		0.854849	991.934		0.854849	965.032		0.854849	983.421		0.854849	1005.62		0.854849	1026.61
0.857743	975.116		0.857743	990.207		0.857743	963.469		0.857743	981.715		0.857743	1003.76		0.857743	1024.59
0.860637	973.788		0.860637	988.529		0.860637	961.893		0.860637	980.012		0.860637	1001.92		0.860637	1022.6
0.863531	972.519		0.863531	986.918		0.863531	960.326		0.863531	978.334		0.863531	1000.12		0.863531	1020.66
0.866424	971.327		0.866424	985.397		0.866424	958.797		0.866424	976.712		0.866424	998.394		0.866424	1018.81
0.869318	970.241		0.869318	984.002		0.869318	957.35		0.869318	975.19		0.869318	996.785		0.869318	1017.1
0.872212	969.306		0.872212	982.793		0.872212	956.058		0.872212	973.842		0.872212	995.369		0.872212	1015.6
0.875106	968.601		0.875106	981.874		0.875106	955.044		0.875106	972.793		0.875106	994.276		0.875106	1014.45
0.878	968.321		0.878	981.505		0.878	954.626		0.878	972.364		0.878	993.831		0.878	1013.98

## Sheet: Axial Velocity
SN 0			SN 0.2			SN 0.4			SN 0.6			SN 0.8			SN 1
Axial distance	velocity		Axial distance	velocity		Axial distance	velocity		Axial distance	velocity		Axial distance	velocity		Axial distance	velocity
0.00115113	14.0673		0.00115113	14.127		0.00115113	14.0221		0.00115113	13.5843		0.00115113	13.4273		0.00115113	13.3603
0.00404502	14.0725		0.00404502	14.1126		0.00404502	13.8906		0.00404502	13.301		0.00404502	13.1182		0.00404502	13.0525
0.00693891	14.0618		0.00693891	14.0791		0.00693891	13.724		0.00693891	12.9865		0.00693891	12.7781		0.00693891	12.7094
0.0098328	14.0399		0.0098328	14.0314		0.0098328	13.5282		0.0098328	12.6389		0.0098328	12.3958		0.0098328	12.3187
0.0127267	14.0072		0.0127267	13.967		0.0127267	13.3051		0.0127267	12.25		0.0127267	11.9608		0.0127267	11.8697
0.0156206	13.963		0.0156206	13.8851		0.0156206	13.0561		0.0156206	11.8146		0.0156206	11.4685		0.0156206	11.3609
0.0185145	13.909		0.0185145	13.7906		0.0185145	12.7831		0.0185145	11.3337		0.0185145	10.9208		0.0185145	10.8003
0.0214084	13.848		0.0214084	13.6876		0.0214084	12.4886		0.0214084	10.81		0.0214084	10.3255		0.0214084	10.2018
0.0243023	13.7814		0.0243023	13.5774		0.0243023	12.1759		0.0243023	10.2487		0.0243023	9.69499		0.0243023	9.58237
0.0271961	13.7103		0.0271961	13.4619		0.0271961	11.8478		0.0271961	9.65697		0.0271961	9.04426		0.0271961	8.95955
0.03009	13.6366		0.03009	13.3436		0.03009	11.5071		0.03009	9.04202		0.03009	8.3893		0.03009	8.349
0.0329839	13.5627		0.0329839	13.2244		0.0329839	11.1563		0.0329839	8.41106		0.0329839	7.74708		0.0329839	7.76361
0.0358778	13.4906		0.0358778	13.1061		0.0358778	10.798		0.0358778	7.77423		0.0358778	7.13114		0.0358778	7.212
0.0387717	13.4215		0.0387717	12.9916		0.0387717	10.4337		0.0387717	7.14427		0.0387717	6.54939		0.0387717	6.69928
0.0416656	13.356		0.0416656	12.8819		0.0416656	10.0652		0.0416656	6.53076		0.0416656	6.00695		0.0416656	6.22846
0.0445595	13.2944		0.0445595	12.7767		0.0445595	9.69372		0.0445595	5.9384		0.0445595	5.50465		0.0445595	5.79866
0.0474534	13.2368		0.0474534	12.6762		0.0474534	9.31942		0.0474534	5.37069		0.0474534	5.03761		0.0474534	5.40457
0.0503473	13.1832		0.0503473	12.5805		0.0503473	8.94348		0.0503473	4.82863		0.0503473	4.59837		0.0503473	5.0393
0.0532412	13.1341		0.0532412	12.4893		0.0532412	8.5672		0.0532412	4.30946		0.0532412	4.1791		0.0532412	4.69683
0.056135	13.0899		0.056135	12.402		0.056135	8.19056		0.056135	3.81016		0.056135	3.77332		0.056135	4.37069
0.0590289	13.0506		0.0590289	12.318		0.0590289	7.81327		0.0590289	3.32925		0.0590289	3.37652		0.0590289	4.05425
0.0619228	13.0156		0.0619228	12.2365		0.0619228	7.43557		0.0619228	2.86699		0.0619228	2.98476		0.0619228	3.74306
0.0648167	12.9844		0.0648167	12.1574		0.0648167	7.0588		0.0648167	2.42622		0.0648167	2.59637		0.0648167	3.43329
0.0677106	12.9567		0.0677106	12.0803		0.0677106	6.68433		0.0677106	2.0123		0.0677106	2.21473		0.0677106	3.11976
0.0706045	12.9322		0.0706045	12.0049		0.0706045	6.3112		0.0706045	1.62985		0.0706045	1.84702		0.0706045	2.79936
0.0734984	12.9102		0.0734984	11.931		0.0734984	5.93742		0.0734984	1.27873		0.0734984	1.4996		0.0734984	2.47381
0.0763923	12.8905		0.0763923	11.8587		0.0763923	5.56277		0.0763923	0.940634		0.0763923	1.17025		0.0763923	2.14818
0.0792862	12.873		0.0792862	11.7885		0.0792862	5.18726		0.0792862	0.594824		0.0792862	0.838117		0.0792862	1.82921
0.0821801	12.8576		0.0821801	11.7203		0.0821801	4.80929		0.0821801	0.236961		0.0821801	0.485559		0.0821801	1.52263
0.085074	12.8436		0.085074	11.6545		0.085074	4.42781		0.085074	-0.112654		0.085074	0.117175		0.085074	1.23026
0.085074	12.8436		0.085074	11.6545		0.085074	4.42781		0.085074	-0.112654		0.085074	0.117175		0.085074	1.23026
0.0879678	12.8305		0.0879678	11.591		0.0879678	4.04231		0.0879678	-0.416545		0.0879678	-0.23809		0.0879678	0.937522
0.0908617	12.8183		0.0908617	11.5299		0.0908617	3.65186		0.0908617	-0.654739		0.0908617	-0.541758		0.0908617	0.629507
0.0937556	12.8068		0.0937556	11.4711		0.0937556	3.25676		0.0937556	-0.832529		0.0937556	-0.778043		0.0937556	0.302929
0.0966495	12.796		0.0966495	11.4144		0.0966495	2.85965		0.0966495	-0.968254		0.0966495	-0.956354		0.0966495	-0.0297804
0.0995434	12.7858		0.0995434	11.36		0.0995434	2.46682		0.0995434	-1.07825		0.0995434	-1.09643		0.0995434	-0.337816
0.102437	12.7763		0.102437	11.3078		0.102437	2.08804		0.102437	-1.17261		0.102437	-1.21337		0.102437	-0.596838
0.105331	12.7677		0.105331	11.2575		0.105331	1.73245		0.105331	-1.2571		0.105331	-1.31524		0.105331	-0.800018
0.108225	12.76		0.108225	11.2093		0.108225	1.40256		0.108225	-1.33512		0.108225	-1.4063		0.108225	-0.957098
0.111119	12.7533		0.111119	11.163		0.111119	1.09163		0.111119	-1.40881		0.111119	-1.48915		0.111119	-1.08302
0.114013	12.7471		0.114013	11.1185		0.114013	0.783731		0.114013	-1.47964		0.114013	-1.56549		0.114013	-1.18877
0.116907	12.7415		0.116907	11.0754		0.116907	0.472423		0.116907	-1.54849		0.116907	-1.6364		0.116907	-1.28049
0.119801	12.7369		0.119801	11.0336		0.119801	0.163929		0.119801	-1.61586		0.119801	-1.70273		0.119801	-1.36174
0.122695	12.7331		0.122695	10.9933		0.122695	-0.128965		0.122695	-1.68201		0.122695	-1.76512		0.122695	-1.43463
0.125588	12.7302		0.125588	10.9543		0.125588	-0.387643		0.125588	-1.74703		0.125588	-1.82396		0.125588	-1.5005
0.128482	12.728		0.128482	10.9166		0.128482	-0.600331		0.128482	-1.81093		0.128482	-1.8794		0.128482	-1.56026
0.131376	12.7265		0.131376	10.88		0.131376	-0.764271		0.131376	-1.87357		0.131376	-1.93142		0.131376	-1.61459
0.13427	12.7259		0.13427	10.8446		0.13427	-0.885348		0.13427	-1.93474		0.13427	-1.98003		0.13427	-1.66383
0.137164	12.7262		0.137164	10.8102		0.137164	-0.974754		0.137164	-1.99415		0.137164	-2.02516		0.137164	-1.70826
0.140058	12.7268		0.140058	10.7767		0.140058	-1.04375		0.140058	-2.05152		0.140058	-2.06679		0.140058	-1.74818
0.142952	12.728		0.142952	10.7439		0.142952	-1.10069		0.142952	-2.10657		0.142952	-2.10485		0.142952	-1.78381
0.145846	12.7295		0.145846	10.7118		0.145846	-1.15126		0.145846	-2.15909		0.145846	-2.13931		0.145846	-1.81529
0.14874	12.7315		0.14874	10.6803		0.14874	-1.19901		0.14874	-2.20889		0.14874	-2.17017		0.14874	-1.84271
0.151633	12.7338		0.151633	10.6494		0.151633	-1.24591		0.151633	-2.25575		0.151633	-2.19742		0.151633	-1.8662
0.154527	12.7364		0.154527	10.6192		0.154527	-1.29315		0.154527	-2.29951		0.154527	-2.2211		0.154527	-1.88585
0.157421	12.7392		0.157421	10.5895		0.157421	-1.34157		0.157421	-2.34002		0.157421	-2.24125		0.157421	-1.90178
0.160315	12.7423		0.160315	10.5604		0.160315	-1.39173		0.160315	-2.37716		0.160315	-2.25791		0.160315	-1.91414
0.163209	12.7456		0.163209	10.5318		0.163209	-1.44388		0.163209	-2.41084		0.163209	-2.27119		0.163209	-1.92303
0.166103	12.7489		0.166103	10.504		0.166103	-1.49792		0.166103	-2.44102		0.166103	-2.28106		0.166103	-1.92858
0.166103	12.7489		0.166103	10.504		0.166103	-1.49792		0.166103	-2.44102		0.166103	-2.28106		0.166103	-1.92858
0.168997	12.7525		0.168997	10.4769		0.168997	-1.55362		0.168997	-2.46765		0.168997	-2.28766		0.168997	-1.93109
0.171891	12.7564		0.171891	10.4505		0.171891	-1.61068		0.171891	-2.49073		0.171891	-2.29121		0.171891	-1.93048
0.174785	12.7607		0.174785	10.4244		0.174785	-1.66879		0.174785	-2.51024		0.174785	-2.29165		0.174785	-1.92694
0.177678	12.765		0.177678	10.3988		0.177678	-1.7276		0.177678	-2.52627		0.177678	-2.28894		0.177678	-1.92084
0.180572	12.7694		0.180572	10.3738		0.180572	-1.78666		0.180572	-2.53874		0.180572	-2.28345		0.180572	-1.91214
0.183466	12.7739		0.183466	10.3495		0.183466	-1.84552		0.183466	-2.54772		0.183466	-2.2753		0.183466	-1.90104
0.18636	12.7785		0.18636	10.3255		0.18636	-1.90373		0.18636	-2.55344		0.18636	-2.26447		0.18636	-1.88766
0.189254	12.7832		0.189254	10.3014		0.189254	-1.9609		0.189254	-2.55594		0.189254	-2.25114		0.189254	-1.87216
0.192148	12.7882		0.192148	10.2775		0.192148	-2.01664		0.192148	-2.55501		0.192148	-2.23541		0.192148	-1.85467
0.195042	12.7934		0.195042	10.2545		0.195042	-2.0706		0.195042	-2.55093		0.195042	-2.21742		0.195042	-1.83535
0.197936	12.7986		0.197936	10.2321		0.197936	-2.12243		0.197936	-2.54396		0.197936	-2.1973		0.197936	-1.81431
0.20083	12.8034		0.20083	10.2098		0.20083	-2.17185		0.20083	-2.53401		0.20083	-2.17517		0.20083	-1.7917
0.203723	12.8082		0.203723	10.1878		0.203723	-2.2186		0.203723	-2.52126		0.203723	-2.15115		0.203723	-1.76763
0.206617	12.8135		0.206617	10.1661		0.206617	-2.26244		0.206617	-2.50582		0.206617	-2.12536		0.206617	-1.74224
0.209511	12.8191		0.209511	10.1446		0.209511	-2.30321		0.209511	-2.4878		0.209511	-2.09793		0.209511	-1.71564
0.212405	12.8246		0.212405	10.1231		0.212405	-2.34073		0.212405	-2.46733		0.212405	-2.06899		0.212405	-1.68794
0.215299	12.83		0.215299	10.1018		0.215299	-2.3749		0.215299	-2.44454		0.215299	-2.03864		0.215299	-1.65926
0.215299	12.83		0.215299	10.1018		0.215299	-2.3749		0.215299	-2.44454		0.215299	-2.03864		0.215299	-1.65926
0.218193	12.8354		0.218193	10.0809		0.218193	-2.40562		0.218193	-2.41956		0.218193	-2.007		0.218193	-1.6297
0.221087	12.8407		0.221087	10.0602		0.221087	-2.43282		0.221087	-2.39251		0.221087	-1.97419		0.221087	-1.59937
0.223981	12.8459		0.223981	10.0397		0.223981	-2.45645		0.223981	-2.36352		0.223981	-1.94031		0.223981	-1.56836
0.226875	12.8508		0.226875	10.0193		0.226875	-2.47649		0.226875	-2.33273		0.226875	-1.90547		0.226875	-1.53676
0.229768	12.8556		0.229768	9.99909		0.229768	-2.4929		0.229768	-2.30024		0.229768	-1.86977		0.229768	-1.50467
0.232662	12.8604		0.232662	9.97893		0.232662	-2.50572		0.232662	-2.26619		0.232662	-1.83332		0.232662	-1.47216
0.235556	12.8651		0.235556	9.95872		0.235556	-2.51496		0.235556	-2.23071		0.235556	-1.7962		0.235556	-1.43932
0.23845	12.8696		0.23845	9.93839		0.23845	-2.52075		0.23845	-2.1939		0.23845	-1.75852		0.23845	-1.40623
0.241344	12.8737		0.241344	9.91793		0.241344	-2.5232		0.241344	-2.15589		0.241344	-1.72035		0.241344	-1.37295
0.244238	12.8777		0.244238	9.89731		0.244238	-2.52199		0.244238	-2.11679		0.244238	-1.68178		0.244238	-1.33955
0.247132	12.8816		0.247132	9.87646		0.247132	-2.51748		0.247132	-2.07671		0.247132	-1.6429		0.247132	-1.3061
0.250026	12.8854		0.250026	9.85541		0.250026	-2.50992		0.250026	-2.03576		0.250026	-1.60377		0.250026	-1.27266
0.25292	12.889		0.25292	9.83424		0.25292	-2.49914		0.25292	-1.99404		0.25292	-1.56448		0.25292	-1.23927
0.255814	12.8925		0.255814	9.81295		0.255814	-2.48536		0.255814	-1.95164		0.255814	-1.52508		0.255814	-1.20599
0.258707	12.8959		0.258707	9.79146		0.258707	-2.46868		0.258707	-1.90867		0.258707	-1.48564		0.258707	-1.17287
0.261601	12.8989		0.261601	9.76972		0.261601	-2.44923		0.261601	-1.86521		0.261601	-1.44623		0.261601	-1.13996
0.264495	12.9015		0.264495	9.74767		0.264495	-2.42713		0.264495	-1.82135		0.264495	-1.4069		0.264495	-1.10728
0.267389	12.9039		0.267389	9.72528		0.267389	-2.40251		0.267389	-1.77717		0.267389	-1.36771		0.267389	-1.07489
0.270283	12.9062		0.270283	9.7026		0.270283	-2.37552		0.270283	-1.73276		0.270283	-1.3287		0.270283	-1.04282
0.273177	12.9082		0.273177	9.67975		0.273177	-2.34628		0.273177	-1.68819		0.273177	-1.28993		0.273177	-1.01109
0.276071	12.91		0.276071	9.65687		0.276071	-2.31494		0.276071	-1.64352		0.276071	-1.25143		0.276071	-0.979737
0.278965	12.9116		0.278965	9.6339		0.278965	-2.28163		0.278965	-1.59884		0.278965	-1.21325		0.278965	-0.948784
0.281859	12.913		0.281859	9.61073		0.281859	-2.2465		0.281859	-1.55419		0.281859	-1.17543		0.281859	-0.918255
0.284752	12.9143		0.284752	9.58731		0.284752	-2.20968		0.284752	-1.50964		0.284752	-1.13799		0.284752	-0.888169
0.287646	12.9153		0.287646	9.5637		0.287646	-2.1713		0.287646	-1.46525		0.287646	-1.10098		0.287646	-0.858544
0.29054	12.9159		0.29054	9.53997		0.29054	-2.13149		0.29054	-1.42107		0.29054	-1.06441		0.29054	-0.829396
0.293434	12.9157		0.293434	9.51614		0.293434	-2.0904		0.293434	-1.37715		0.293434	-1.02833		0.293434	-0.800736
0.296328	12.9149		0.296328	9.49196		0.296328	-2.04814		0.296328	-1.33354		0.296328	-0.992743		0.296328	-0.772577
0.299222	12.9134		0.299222	9.4671		0.299222	-2.00484		0.299222	-1.29027		0.299222	-0.957679		0.299222	-0.744927
0.302116	12.9112		0.302116	9.44155		0.302116	-1.96062		0.302116	-1.24739		0.302116	-0.923156		0.302116	-0.717793
0.30501	12.9083		0.30501	9.41558		0.30501	-1.9156		0.30501	-1.20493		0.30501	-0.889189		0.30501	-0.69118
0.307904	12.9047		0.307904	9.38943		0.307904	-1.86987		0.307904	-1.16293		0.307904	-0.855795		0.307904	-0.665092
0.310797	12.9002		0.310797	9.3629		0.310797	-1.82356		0.310797	-1.12142		0.310797	-0.822984		0.310797	-0.63953
0.313691	12.8945		0.313691	9.33538		0.313691	-1.77677		0.313691	-1.08043		0.313691	-0.790767		0.313691	-0.614494
0.313691	12.8945		0.313691	9.33538		0.313691	-1.77677		0.313691	-1.08043		0.313691	-0.790767		0.313691	-0.614494
0.316585	12.8875		0.316585	9.30672		0.316585	-1.72958		0.316585	-1.03998		0.316585	-0.759153		0.316585	-0.589984
0.319479	12.8793		0.319479	9.27731		0.319479	-1.68209		0.319479	-1.00009		0.319479	-0.728149		0.319479	-0.565997
0.322373	12.8699		0.322373	9.24741		0.322373	-1.6344		0.322373	-0.960795		0.322373	-0.697759		0.322373	-0.542529
0.325267	12.8595		0.325267	9.21715		0.325267	-1.58658		0.325267	-0.922104		0.325267	-0.667986		0.325267	-0.519577
0.328161	12.8485		0.328161	9.18655		0.328161	-1.53871		0.328161	-0.884037		0.328161	-0.638834		0.328161	-0.497134
0.331055	12.8372		0.331055	9.15559		0.331055	-1.49087		0.331055	-0.846606		0.331055	-0.610301		0.331055	-0.475194
0.333949	12.8255		0.333949	9.1243		0.333949	-1.44312		0.333949	-0.809826		0.333949	-0.582388		0.333949	-0.453749
0.336842	12.8131		0.336842	9.0927		0.336842	-1.39553		0.336842	-0.773707		0.336842	-0.555092		0.336842	-0.432792
0.339736	12.8001		0.339736	9.06074		0.339736	-1.34816		0.339736	-0.738256		0.339736	-0.528409		0.339736	-0.412313
0.34263	12.7864		0.34263	9.02841		0.34263	-1.30106		0.34263	-0.703483		0.34263	-0.502335		0.34263	-0.392303
0.345524	12.7718		0.345524	8.99565		0.345524	-1.25429		0.345524	-0.669391		0.345524	-0.476865		0.345524	-0.372752
0.348418	12.7561		0.348418	8.96239		0.348418	-1.2079		0.348418	-0.635986		0.348418	-0.451991		0.348418	-0.35365
0.351312	12.7394		0.351312	8.92881		0.351312	-1.16193		0.351312	-0.603269		0.351312	-0.427707		0.351312	-0.334985
0.354206	12.7221		0.354206	8.8948		0.354206	-1.11641		0.354206	-0.571242		0.354206	-0.404004		0.354206	-0.316748
0.3571	12.7038		0.3571	8.86013		0.3571	-1.0714		0.3571	-0.539905		0.3571	-0.380873		0.3571	-0.298927
0.359994	12.6841		0.359994	8.82488		0.359994	-1.02691		0.359994	-0.509257		0.359994	-0.358306		0.359994	-0.28151
0.362887	12.6634		0.362887	8.78922		0.362887	-0.982988		0.362887	-0.479294		0.362887	-0.336291		0.362887	-0.264485
0.365781	12.6425		0.365781	8.75329		0.365781	-0.939654		0.365781	-0.450013		0.365781	-0.314817		0.365781	-0.247841
0.368675	12.6213		0.368675	8.71708		0.368675	-0.896934		0.368675	-0.421409		0.368675	-0.293874		0.368675	-0.231566
0.371569	12.5991		0.371569	8.68042		0.371569	-0.85485		0.371569	-0.393476		0.371569	-0.273448		0.371569	-0.215648
0.374463	12.5751		0.374463	8.64346		0.374463	-0.813421		0.374463	-0.366207		0.374463	-0.253528		0.374463	-0.200073
0.377357	12.549		0.377357	8.60623		0.377357	-0.772664		0.377357	-0.339595		0.377357	-0.234102		0.377357	-0.184831
0.380251	12.521		0.380251	8.56839		0.380251	-0.732597		0.380251	-0.313633		0.380251	-0.215157		0.380251	-0.169911
0.383145	12.4914		0.383145	8.5299		0.383145	-0.693232		0.383145	-0.288312		0.383145	-0.196682		0.383145	-0.155302
0.386039	12.46		0.386039	8.49063		0.386039	-0.654578		0.386039	-0.263623		0.386039	-0.178664		0.386039	-0.140993
0.388932	12.4265		0.388932	8.45037		0.388932	-0.616644		0.388932	-0.239555		0.388932	-0.161088		0.388932	-0.126972
0.391826	12.3903		0.391826	8.40949		0.391826	-0.579437		0.391826	-0.216098		0.391826	-0.143943		0.391826	-0.113228
0.39472	12.3521		0.39472	8.36833		0.39472	-0.542961		0.39472	-0.19324		0.39472	-0.127215		0.39472	-0.0997513
0.397614	12.3121		0.397614	8.32684		0.397614	-0.507221		0.397614	-0.17097		0.397614	-0.11089		0.397614	-0.0865303
0.400508	12.2704		0.400508	8.28463		0.400508	-0.472218		0.400508	-0.149276		0.400508	-0.094956		0.400508	-0.0735554
0.403402	12.2264		0.403402	8.24135		0.403402	-0.437953		0.403402	-0.128146		0.403402	-0.0793999		0.403402	-0.0608166
0.403402	12.2264		0.403402	8.24135		0.403402	-0.437953		0.403402	-0.128146		0.403402	-0.0793999		0.403402	-0.0608166
0.406296	12.18		0.406296	8.1972		0.406296	-0.404425		0.406296	-0.107567		0.406296	-0.0642089		0.406296	-0.0483045
0.40919	12.1314		0.40919	8.15264		0.40919	-0.371632		0.40919	-0.0875259		0.40919	-0.0493703		0.40919	-0.0360097
0.412084	12.0803		0.412084	8.10767		0.412084	-0.33957		0.412084	-0.0680108		0.412084	-0.0348717		0.412084	-0.0239233
0.414977	12.0262		0.414977	8.062		0.414977	-0.308237		0.414977	-0.0490081		0.414977	-0.0207007		0.414977	-0.0120366
0.417871	11.9688		0.417871	8.01555		0.417871	-0.277626		0.417871	-0.0305045		0.417871	-0.00684524		0.417871	-0.000341137
0.420765	11.9088		0.420765	7.9683		0.420765	-0.247732		0.420765	-0.0124868		0.420765	0.00670654		0.420765	0.0111711
0.423659	11.8468		0.423659	7.92032		0.423659	-0.218547		0.423659	0.00505833		0.423659	0.0199663		0.423659	0.0225079
0.426553	11.7831		0.426553	7.87135		0.426553	-0.190064		0.426553	0.0221444		0.426553	0.0329454		0.426553	0.0336768
0.429447	11.7173		0.429447	7.82058		0.429447	-0.162274		0.429447	0.0387848		0.429447	0.0456549		0.429447	0.0446851
0.432341	11.6484		0.432341	7.76716		0.432341	-0.135169		0.432341	0.0549927		0.432341	0.0581057		0.432341	0.0555395
0.435235	11.5764		0.435235	7.71172		0.435235	-0.108739		0.435235	0.0707815		0.435235	0.0703083		0.435235	0.0662468
0.438129	11.5022		0.438129	7.65565		0.438129	-0.0829727		0.438129	0.0861643		0.438129	0.0822729		0.438129	0.0768133
0.441023	11.4256		0.441023	7.59899		0.441023	-0.0578605		0.441023	0.101154		0.441023	0.0940096		0.441023	0.0872451
0.443916	11.3455		0.443916	7.5415		0.443916	-0.033391		0.443916	0.115764		0.443916	0.105528		0.443916	0.0975481
0.44681	11.2613		0.44681	7.48329		0.44681	-0.0095527		0.44681	0.130006		0.44681	0.116837		0.44681	0.107728
0.449704	11.1725		0.449704	7.4243		0.449704	0.0136664		0.449704	0.143893		0.449704	0.127947		0.449704	0.11779
0.452598	11.0801		0.452598	7.36496		0.452598	0.0362783		0.452598	0.157438		0.452598	0.138866		0.452598	0.127739
0.455492	10.9861		0.455492	7.30563		0.455492	0.0582957		0.455492	0.170653		0.455492	0.149602		0.455492	0.137581
0.458386	10.8904		0.458386	7.24593		0.458386	0.079731		0.458386	0.18355		0.458386	0.160163		0.458386	0.14732
0.46128	10.7926		0.46128	7.1857		0.46128	0.100597		0.46128	0.19614		0.46128	0.170559		0.46128	0.15696
0.464174	10.6932		0.464174	7.12529		0.464174	0.120907		0.464174	0.208435		0.464174	0.180796		0.464174	0.166506
0.467068	10.5929		0.467068	7.06483		0.467068	0.140673		0.467068	0.220447		0.467068	0.190882		0.467068	0.175963
0.469961	10.4914		0.469961	7.00422		0.469961	0.15991		0.469961	0.232186		0.469961	0.200823		0.469961	0.185334
0.472855	10.3891		0.472855	6.9433		0.472855	0.178629		0.472855	0.243663		0.472855	0.210628		0.472855	0.194623
0.475749	10.2867		0.475749	6.88185		0.475749	0.196845		0.475749	0.254889		0.475749	0.220302		0.475749	0.203833
0.478643	10.184		0.478643	6.81985		0.478643	0.21457		0.478643	0.265873		0.478643	0.229852		0.478643	0.21297
0.481537	10.0803		0.481537	6.75749		0.481537	0.231818		0.481537	0.276626		0.481537	0.239284		0.481537	0.222035
0.484431	9.97618		0.484431	6.69502		0.484431	0.248602		0.484431	0.287158		0.484431	0.248604		0.484431	0.231032
0.487325	9.872		0.487325	6.63255		0.487325	0.264934		0.487325	0.297478		0.487325	0.257818		0.487325	0.239965
0.490219	9.76793		0.490219	6.56998		0.490219	0.280829		0.490219	0.307595		0.490219	0.266931		0.490219	0.248837
0.493113	9.66401		0.493113	6.50725		0.493113	0.296298		0.493113	0.317518		0.493113	0.27595		0.493113	0.257651
0.496006	9.56022		0.496006	6.44445		0.496006	0.311354		0.496006	0.327256		0.496006	0.284878		0.496006	0.26641
0.4989	9.45654		0.4989	6.3816		0.4989	0.326011		0.4989	0.336818		0.4989	0.293721		0.4989	0.275117
0.501794	9.35316		0.501794	6.3187		0.501794	0.340281		0.501794	0.346211		0.501794	0.302484		0.501794	0.283775
0.504688	9.25013		0.504688	6.25591		0.504688	0.354175		0.504688	0.355445		0.504688	0.311172		0.504688	0.292387
0.507582	9.14709		0.507582	6.19319		0.507582	0.367707		0.507582	0.364525		0.507582	0.319789		0.507582	0.300956
0.510476	9.04411		0.510476	6.13038		0.510476	0.380888		0.510476	0.373461		0.510476	0.32834		0.510476	0.309485
0.51337	8.94167		0.51337	6.0675		0.51337	0.39373		0.51337	0.382259		0.51337	0.336829		0.51337	0.317976
0.516264	8.83982		0.516264	6.00471		0.516264	0.406245		0.516264	0.390927		0.516264	0.34526		0.516264	0.326433
0.519158	8.73845		0.519158	5.94208		0.519158	0.418445		0.519158	0.399473		0.519158	0.35364		0.519158	0.334859
0.522051	8.63752		0.522051	5.87962		0.522051	0.430341		0.522051	0.407903		0.522051	0.36197		0.522051	0.343257
0.524945	8.53685		0.524945	5.81721		0.524945	0.441944		0.524945	0.416223		0.524945	0.370256		0.524945	0.351629
0.524945	8.53685		0.524945	5.81721		0.524945	0.441944		0.524945	0.416223		0.524945	0.370256		0.524945	0.351629
0.527839	8.4364		0.527839	5.75477		0.527839	0.453264		0.527839	0.42444		0.527839	0.378501		0.527839	0.359979
0.530733	8.33636		0.530733	5.69236		0.530733	0.464313		0.530733	0.43256		0.530733	0.386709		0.530733	0.368309
0.533627	8.23674		0.533627	5.63005		0.533627	0.4751		0.533627	0.44059		0.533627	0.394884		0.533627	0.376622
0.536521	8.13753		0.536521	5.56789		0.536521	0.485636		0.536521	0.448535		0.536521	0.403029		0.536521	0.384922
0.539415	8.03891		0.539415	5.50595		0.539415	0.495932		0.539415	0.456401		0.539415	0.41115		0.539415	0.393212
0.542309	7.94097		0.542309	5.44428		0.542309	0.505998		0.542309	0.464195		0.542309	0.41925		0.542309	0.401495
0.545203	7.84369		0.545203	5.38294		0.545203	0.515842		0.545203	0.471923		0.545203	0.427332		0.545203	0.409775
0.548096	7.7471		0.548096	5.32196		0.548096	0.525475		0.548096	0.479589		0.548096	0.435401		0.548096	0.418054
0.55099	7.65124		0.55099	5.26136		0.55099	0.534907		0.55099	0.4872		0.55099	0.44346		0.55099	0.426337
0.553884	7.55608		0.553884	5.20117		0.553884	0.544146		0.553884	0.494761		0.553884	0.451515		0.553884	0.434627
0.556778	7.46176		0.556778	5.14147		0.556778	0.553201		0.556778	0.502277		0.556778	0.459568		0.556778	0.442928
0.559672	7.3684		0.559672	5.08224		0.559672	0.562082		0.559672	0.509755		0.559672	0.467624		0.559672	0.451243
0.562566	7.27592		0.562566	5.02347		0.562566	0.570798		0.562566	0.517199		0.562566	0.475688		0.562566	0.459576
0.56546	7.1842		0.56546	4.96518		0.56546	0.579357		0.56546	0.524615		0.56546	0.483762		0.56546	0.467932
0.568354	7.09335		0.568354	4.9074		0.568354	0.587767		0.568354	0.532008		0.568354	0.491852		0.568354	0.476314
0.571248	7.00346		0.571248	4.85018		0.571248	0.596038		0.571248	0.539385		0.571248	0.499963		0.571248	0.484727
0.574142	6.91446		0.574142	4.79349		0.574142	0.604177		0.574142	0.546749		0.574142	0.508098		0.574142	0.493175
0.577035	6.82623		0.577035	4.73731		0.577035	0.612194		0.577035	0.554108		0.577035	0.516262		0.577035	0.501662
0.579929	6.73889		0.579929	4.68164		0.579929	0.620095		0.579929	0.561466		0.579929	0.52446		0.579929	0.510193
0.582823	6.6526		0.582823	4.62655		0.582823	0.62789		0.582823	0.568828		0.582823	0.532697		0.582823	0.518773
0.585717	6.56728		0.585717	4.57208		0.585717	0.635587		0.585717	0.576202		0.585717	0.540979		0.585717	0.527408
0.588611	6.48279		0.588611	4.51821		0.588611	0.643192		0.588611	0.583591		0.588611	0.549309		0.588611	0.536103
0.591505	6.39908		0.591505	4.4649		0.591505	0.650716		0.591505	0.591003		0.591505	0.557693		0.591505	0.544865
0.594399	6.3163		0.594399	4.41214		0.594399	0.658166		0.594399	0.598444		0.594399	0.566137		0.594399	0.553701
0.597293	6.23455		0.597293	4.35994		0.597293	0.665549		0.597293	0.605919		0.597293	0.574647		0.597293	0.562616
0.600186	6.1538		0.600186	4.30838		0.600186	0.672875		0.600186	0.613435		0.600186	0.583229		0.600186	0.571617
0.60308	6.07396		0.60308	4.25748		0.60308	0.68015		0.60308	0.620998		0.60308	0.59189		0.60308	0.580707
0.605974	5.99496		0.605974	4.20725		0.605974	0.687384		0.605974	0.628614		0.605974	0.600637		0.605974	0.589891
0.608868	5.91678		0.608868	4.15766		0.608868	0.694585		0.608868	0.636291		0.608868	0.609478		0.608868	0.599174
0.611762	5.83946		0.611762	4.10868		0.611762	0.701762		0.611762	0.644036		0.611762	0.618422		0.611762	0.608562
0.614656	5.76314		0.614656	4.06031		0.614656	0.708922		0.614656	0.651855		0.614656	0.627473		0.614656	0.618064
0.61755	5.68787		0.61755	4.01252		0.61755	0.716074		0.61755	0.659757		0.61755	0.636638		0.61755	0.627689
0.620444	5.61359		0.620444	3.96532		0.620444	0.723228		0.620444	0.667751		0.620444	0.645921		0.620444	0.637444
0.623338	5.54026		0.623338	3.91872		0.623338	0.730392		0.623338	0.675845		0.623338	0.655331		0.623338	0.647339
0.626231	5.46782		0.626231	3.87279		0.626231	0.737577		0.626231	0.684049		0.626231	0.664874		0.626231	0.657382
0.629125	5.39624		0.629125	3.82755		0.629125	0.744791		0.629125	0.692373		0.629125	0.674563		0.629125	0.667582
0.632019	5.32551		0.632019	3.78297		0.632019	0.752046		0.632019	0.700824		0.632019	0.684406		0.632019	0.677947
0.634913	5.25558		0.634913	3.73903		0.634913	0.759353		0.634913	0.709411		0.634913	0.694415		0.634913	0.688486
0.637807	5.18654		0.637807	3.69572		0.637807	0.766723		0.637807	0.71814		0.637807	0.7046		0.637807	0.69921
0.640701	5.11845		0.640701	3.65302		0.640701	0.774165		0.640701	0.727022		0.640701	0.714971		0.640701	0.710127
0.643595	5.05129		0.643595	3.61091		0.643595	0.781691		0.643595	0.736069		0.643595	0.725539		0.643595	0.72125
0.643595	5.05129		0.643595	3.61091		0.643595	0.781691		0.643595	0.736069		0.643595	0.725539		0.643595	0.72125
0.646489	4.98501		0.646489	3.56938		0.646489	0.789311		0.646489	0.745292		0.646489	0.736315		0.646489	0.732588
0.649383	4.9196		0.649383	3.52847		0.649383	0.797036		0.649383	0.754707		0.649383	0.747311		0.649383	0.744153
0.652277	4.85505		0.652277	3.4882		0.652277	0.804879		0.652277	0.764325		0.652277	0.75854		0.652277	0.755957
0.65517	4.79138		0.65517	3.44857		0.65517	0.812854		0.65517	0.774161		0.65517	0.770015		0.65517	0.768012
0.658064	4.72862		0.658064	3.40961		0.658064	0.820976		0.658064	0.784227		0.658064	0.781749		0.658064	0.780332
0.660958	4.66676		0.660958	3.3713		0.660958	0.829262		0.660958	0.794539		0.660958	0.793757		0.660958	0.792929
0.663852	4.60582		0.663852	3.33365		0.663852	0.837727		0.663852	0.805113		0.663852	0.806054		0.663852	0.805818
0.666746	4.54581		0.666746	3.29667		0.666746	0.846387		0.666746	0.815964		0.666746	0.818656		0.666746	0.819014
0.66964	4.48671		0.66964	3.26034		0.66964	0.85526		0.66964	0.82711		0.66964	0.83158		0.66964	0.832533
0.672534	4.42854		0.672534	3.22469		0.672534	0.864364		0.672534	0.83857		0.672534	0.844843		0.672534	0.84639
0.675428	4.37129		0.675428	3.1897		0.675428	0.873717		0.675428	0.850362		0.675428	0.858464		0.675428	0.860602
0.678322	4.31497		0.678322	3.15539		0.678322	0.883341		0.678322	0.862506		0.678322	0.872462		0.678322	0.875188
0.681215	4.25957		0.681215	3.12175		0.681215	0.893258		0.681215	0.875026		0.681215	0.886857		0.681215	0.890166
0.684109	4.20511		0.684109	3.08881		0.684109	0.90349		0.684109	0.887942		0.684109	0.901672		0.684109	0.905557
0.687003	4.15158		0.687003	3.05655		0.687003	0.914063		0.687003	0.90128		0.687003	0.916929		0.687003	0.921381
0.689897	4.09898		0.689897	3.025		0.689897	0.925002		0.689897	0.915065		0.689897	0.932653		0.689897	0.937661
0.692791	4.04732		0.692791	2.99416		0.692791	0.936334		0.692791	0.929325		0.692791	0.94887		0.692791	0.95442
0.695685	3.9966		0.695685	2.96406		0.695685	0.948091		0.695685	0.944088		0.695685	0.965606		0.695685	0.971682
0.698579	3.94686		0.698579	2.93469		0.698579	0.960304		0.698579	0.959387		0.698579	0.98289		0.698579	0.989474
0.701473	3.89809		0.701473	2.90608		0.701473	0.973006		0.701473	0.975253		0.701473	1.00075		0.701473	1.00782
0.704367	3.85032		0.704367	2.87826		0.704367	0.986235		0.704367	0.991723		0.704367	1.01923		0.704367	1.02676
0.70726	3.80356		0.70726	2.85124		0.70726	1.00003		0.70726	1.00883		0.70726	1.03835		0.70726	1.04631
0.710154	3.75784		0.710154	2.82505		0.710154	1.01443		0.710154	1.02662		0.710154	1.05815		0.710154	1.06652
0.713048	3.71318		0.713048	2.79971		0.713048	1.02948		0.713048	1.04514		0.713048	1.07868		0.713048	1.08741
0.715942	3.6696		0.715942	2.77524		0.715942	1.04523		0.715942	1.06442		0.715942	1.09997		0.715942	1.10903
0.715942	3.6696		0.715942	2.77524		0.715942	1.04523		0.715942	1.06442		0.715942	1.09997		0.715942	1.10903
0.718836	3.62715		0.718836	2.75173		0.718836	1.06174		0.718836	1.08453		0.718836	1.12208		0.718836	1.13141
0.72173	3.58587		0.72173	2.7292		0.72173	1.07905		0.72173	1.10551		0.72173	1.14504		0.72173	1.1546
0.724624	3.54582		0.724624	2.70768		0.724624	1.09723		0.724624	1.12741		0.724624	1.16891		0.724624	1.17864
0.727518	3.50703		0.727518	2.68723		0.727518	1.11635		0.727518	1.15031		0.727518	1.19375		0.727518	1.2036
0.730412	3.46954		0.730412	2.66792		0.730412	1.13647		0.730412	1.17427		0.730412	1.21961		0.730412	1.22951
0.733305	3.43344		0.733305	2.6498		0.733305	1.15767		0.733305	1.19935		0.733305	1.24657		0.733305	1.25643
0.736199	3.39884		0.736199	2.63295		0.736199	1.18004		0.736199	1.22565		0.736199	1.27469		0.736199	1.28444
0.739093	3.36579		0.739093	2.61745		0.739093	1.20367		0.739093	1.25324		0.739093	1.30406		0.739093	1.3136
0.741987	3.33438		0.741987	2.6034		0.741987	1.22865		0.741987	1.28221		0.741987	1.33474		0.741987	1.34398
0.744881	3.30473		0.744881	2.5909		0.744881	1.25509		0.744881	1.31267		0.744881	1.36684		0.744881	1.37567
0.747775	3.27695		0.747775	2.58009		0.747775	1.28311		0.747775	1.34472		0.747775	1.40045		0.747775	1.40875
0.750669	3.25118		0.750669	2.57109		0.750669	1.31285		0.750669	1.37849		0.750669	1.43569		0.750669	1.44332
0.753563	3.22758		0.753563	2.56405		0.753563	1.34443		0.753563	1.4141		0.753563	1.47267		0.753563	1.47948
0.756457	3.20633		0.756457	2.55915		0.756457	1.37802		0.756457	1.45171		0.756457	1.51152		0.756457	1.51736
0.75935	3.18764		0.75935	2.55661		0.75935	1.41379		0.75935	1.49146		0.75935	1.55238		0.75935	1.55708
0.762244	3.17173		0.762244	2.55666		0.762244	1.45193		0.762244	1.53355		0.762244	1.59543		0.762244	1.59878
0.765138	3.15887		0.765138	2.55957		0.765138	1.49264		0.765138	1.57816		0.765138	1.64082		0.765138	1.64262
0.768032	3.14935		0.768032	2.56563		0.768032	1.53617		0.768032	1.62551		0.768032	1.68875		0.768032	1.68876
0.770926	3.14352		0.770926	2.57518		0.770926	1.58278		0.770926	1.67584		0.770926	1.73944		0.770926	1.7374
0.77382	3.14185		0.77382	2.58862		0.77382	1.63276		0.77382	1.72941		0.77382	1.79313		0.77382	1.78875
0.776714	3.14475		0.776714	2.60639		0.776714	1.68643		0.776714	1.78652		0.776714	1.85006		0.776714	1.84302
0.779608	3.15269		0.779608	2.629		0.779608	1.74415		0.779608	1.84749		0.779608	1.91052		0.779608	1.90047
0.782502	3.16629		0.782502	2.65701		0.782502	1.80633		0.782502	1.91267		0.782502	1.97482		0.782502	1.96138
0.785396	3.18621		0.785396	2.69107		0.785396	1.87341		0.785396	1.98245		0.785396	2.0433		0.785396	2.02605
0.788289	3.21316		0.788289	2.73186		0.788289	1.94591		0.788289	2.05728		0.788289	2.11635		0.788289	2.09482
0.791183	3.24796		0.791183	2.78012		0.791183	2.02438		0.791183	2.13764		0.791183	2.19439		0.791183	2.16806
0.794077	3.29149		0.794077	2.83668		0.794077	2.10944		0.794077	2.22406		0.794077	2.27789		0.794077	2.2462
0.796971	3.34468		0.796971	2.90239		0.796971	2.20178		0.796971	2.31715		0.796971	2.36736		0.796971	2.32969
0.799865	3.40855		0.799865	2.97818		0.799865	2.30218		0.799865	2.41756		0.799865	2.4634		0.799865	2.41906
0.799865	3.40855		0.799865	2.97818		0.799865	2.30218		0.799865	2.41756		0.799865	2.4634		0.799865	2.41906
0.802759	3.48417		0.802759	3.06508		0.802759	2.41151		0.802759	2.52606		0.802759	2.56666		0.802759	2.51489
0.805653	3.57271		0.805653	3.16418		0.805653	2.53076		0.805653	2.64348		0.805653	2.67787		0.805653	2.61783
0.808547	3.67544		0.808547	3.27673		0.808547	2.66103		0.808547	2.77079		0.808547	2.79786		0.808547	2.72861
0.811441	3.79373		0.811441	3.40409		0.811441	2.80355		0.811441	2.90904		0.811441	2.92755		0.811441	2.84806
0.814334	3.92914		0.814334	3.54785		0.814334	2.95973		0.814334	3.05942		0.814334	3.068		0.814334	2.97709
0.817228	4.0834		0.817228	3.70977		0.817228	3.13112		0.817228	3.22329		0.817228	3.22034		0.817228	3.11672
0.820122	4.25845		0.820122	3.89186		0.820122	3.31949		0.820122	3.40213		0.820122	3.38588		0.820122	3.2681
0.823016	4.4565		0.823016	4.09637		0.823016	3.52676		0.823016	3.59759		0.823016	3.56604		0.823016	3.43247
0.82591	4.67998		0.82591	4.32583		0.82591	3.7551		0.82591	3.8115		0.82591	3.76237		0.82591	3.6112
0.828804	4.93161		0.828804	4.58298		0.828804	4.00685		0.828804	4.04582		0.828804	3.97656		0.828804	3.80578
0.831698	5.21434		0.831698	4.87085		0.831698	4.28457		0.831698	4.3027		0.831698	4.21043		0.831698	4.01779
0.834592	5.53129		0.834592	5.19263		0.834592	4.59097		0.834592	4.58439		0.834592	4.46588		0.834592	4.24887
0.837486	5.88575		0.837486	5.55167		0.837486	4.92891		0.837486	4.89323		0.837486	4.74487		0.837486	4.50072
0.840379	6.28101		0.840379	5.95135		0.840379	5.30131		0.840379	5.23155		0.840379	5.04931		0.840379	4.77498
0.843273	6.72026		0.843273	6.39499		0.843273	5.71102		0.843273	5.60162		0.843273	5.38103		0.843273	5.0732
0.846167	7.20638		0.846167	6.8856		0.846167	6.16069		0.846167	6.00544		0.846167	5.7416		0.846167	5.39665
0.849061	7.74169		0.849061	7.42572		0.849061	6.65258		0.849061	6.44459		0.849061	6.13216		0.849061	5.74623
0.851955	8.32773		0.851955	8.01711		0.851955	7.18829		0.851955	6.92003		0.851955	6.55327		0.851955	6.12227
0.854849	8.96483		0.854849	8.66039		0.854849	7.76841		0.854849	7.43175		0.854849	7.00457		0.854849	6.5243
0.857743	9.65214		0.857743	9.35501		0.857743	8.3925		0.857743	7.97875		0.857743	7.48483		0.857743	6.95099
0.860637	10.3866		0.860637	10.0981		0.860637	9.05798		0.860637	8.55817		0.860637	7.99112		0.860637	7.39955
0.863531	11.1649		0.863531	10.887		0.863531	9.76237		0.863531	9.16709		0.863531	8.52045		0.863531	7.86706
0.866424	11.9776		0.866424	11.7119		0.866424	10.4965		0.866424	9.79708		0.866424	9.06517		0.866424	8.3466
0.869318	12.8285		0.869318	12.5777		0.869318	11.265		0.869318	10.4511		0.869318	9.62726		0.869318	8.83959
0.872212	13.6853		0.872212	13.4502		0.872212	12.0344		0.872212	11.1013		0.872212	10.1832		0.872212	9.3256
0.875106	14.6374		0.875106	14.4235		0.875106	12.8927		0.875106	11.8206		0.875106	10.7945		0.875106	9.85821
0.878	15.1709		0.878	14.9709		0.878	13.3779		0.878	12.2256		0.878	11.1376		0.878	10.1565

## Sheet: Radial temp distribution
SN 0			SN 0.2			SN 0.4			SN 0.6			SN 0.8			SN 1
Radial distance	temperature		Radial distance	temperature		Radial distance	temperature		Radial distance	temperature		Radial distance	temperature		Radial distance	temperature
0	968.324		0	981.507		0	954.627		0	972.364		0	993.831		0	1013.98
0.005	967.79		0.005	980.803		0.005	953.815		0.005	971.54		0.005	992.982		0.005	1013.09
0.01	966.226		0.01	978.739		0.01	951.408		0.01	969.096		0.01	990.468		0.01	1010.47
0.015	963.619		0.015	975.31		0.015	947.319		0.015	964.953		0.015	986.216		0.015	1006.04
0.02	959.924		0.02	970.467		0.02	941.358		0.02	958.928		0.02	980.054		0.02	999.631
0.025	955.103		0.025	964.19		0.025	933.332		0.025	950.84		0.025	971.812		0.025	991.097
0.03	949.013		0.03	956.342		0.03	922.937		0.03	940.389		0.03	961.199		0.03	980.15
0.035	941.166		0.035	946.405		0.035	909.43		0.035	926.855		0.035	947.498		0.035	966.069
0.04	928.657		0.04	931.144		0.04	888.933		0.04	906.458		0.04	926.956		0.04	944.993
0.045	784.338		0.045	781.3		0.045	746.769		0.045	757.038		0.045	768.03		0.045	776.328

## Sheet: n2o distribution
SN 0			SN 0.2			SN 0.4			SN 0.6			SN 0.8			SN 1
Axial distance	n2o mass fraction		Axial distance	n2o mass fraction		Axial distance	n2o mass fraction		Axial distance	n2o mass fraction		Axial distance	n2o mass fraction		Axial distance	n2o mass fraction
0.00115113	1.46995e-10		0.00115113	1.45585e-10		0.00115113	1.38949e-10		0.00115113	2.3127e-11		0.00115113	1.11829e-11		0.00115113	9.5816e-12
0.00404502	1.9396e-10		0.00404502	1.92638e-10		0.00404502	1.68411e-10		0.00404502	2.89174e-11		0.00404502	1.24238e-11		0.00404502	1.02031e-11
0.00693891	2.4858e-10		0.00693891	2.48673e-10		0.00693891	1.95091e-10		0.00693891	3.45689e-11		0.00693891	1.35216e-11		0.00693891	1.05052e-11
0.0098328	3.13069e-10		0.0098328	3.14633e-10		0.0098328	2.15952e-10		0.0098328	4.00432e-11		0.0098328	1.43169e-11		0.0098328	1.05245e-11
0.0127267	3.86766e-10		0.0127267	3.86423e-10		0.0127267	2.295e-10		0.0127267	4.49307e-11		0.0127267	1.48784e-11		0.0127267	1.02931e-11
0.0156206	4.67669e-10		0.0156206	4.60707e-10		0.0156206	2.36198e-10		0.0156206	4.88915e-11		0.0156206	1.5205e-11		0.0156206	9.84673e-12
0.0185145	5.52326e-10		0.0185145	5.33258e-10		0.0185145	2.38171e-10		0.0185145	5.17985e-11		0.0185145	1.52495e-11		0.0185145	9.26149e-12
0.0214084	6.36345e-10		0.0214084	5.99135e-10		0.0214084	2.3827e-10		0.0214084	5.38396e-11		0.0214084	1.49974e-11		0.0214084	8.59577e-12
0.0243023	7.15105e-10		0.0243023	6.54112e-10		0.0243023	2.38656e-10		0.0243023	5.4812e-11		0.0243023	1.44255e-11		0.0243023	7.88227e-12
0.0271961	7.84399e-10		0.0271961	6.95721e-10		0.0271961	2.40104e-10		0.0271961	5.47396e-11		0.0271961	1.36408e-11		0.0271961	7.13708e-12
0.03009	8.41142e-10		0.03009	7.23129e-10		0.03009	2.42285e-10		0.03009	5.38227e-11		0.03009	1.27849e-11		0.03009	6.47445e-12
0.0329839	8.84071e-10		0.0329839	7.36532e-10		0.0329839	2.44817e-10		0.0329839	5.18457e-11		0.0329839	1.19942e-11		0.0329839	5.99195e-12
0.0358778	9.12694e-10		0.0358778	7.3742e-10		0.0358778	2.47095e-10		0.0358778	4.8954e-11		0.0358778	1.12805e-11		0.0358778	5.76141e-12
0.0387717	9.27319e-10		0.0387717	7.2836e-10		0.0387717	2.48385e-10		0.0387717	4.54934e-11		0.0387717	1.06892e-11		0.0387717	5.85841e-12
0.0416656	9.29599e-10		0.0416656	7.1193e-10		0.0416656	2.48673e-10		0.0416656	4.18326e-11		0.0416656	1.04147e-11		0.0416656	6.33083e-12
0.0445595	9.21551e-10		0.0445595	6.90575e-10		0.0445595	2.48128e-10		0.0445595	3.83196e-11		0.0445595	1.0724e-11		0.0445595	7.22546e-12
0.0474534	9.05679e-10		0.0474534	6.66797e-10		0.0474534	2.46796e-10		0.0474534	3.53924e-11		0.0474534	1.19114e-11		0.0474534	8.60249e-12
0.0503473	8.83959e-10		0.0503473	6.42965e-10		0.0503473	2.44777e-10		0.0503473	3.3579e-11		0.0503473	1.44038e-11		0.0503473	1.05233e-11
0.0532412	8.57909e-10		0.0532412	6.21301e-10		0.0532412	2.42738e-10		0.0532412	3.41987e-11		0.0532412	1.91773e-11		0.0532412	1.30435e-11
0.056135	8.29356e-10		0.056135	6.03779e-10		0.056135	2.40516e-10		0.056135	4.11779e-11		0.056135	2.86648e-11		0.056135	1.62408e-11
0.0590289	8.00079e-10		0.0590289	5.91901e-10		0.0590289	2.37452e-10		0.0590289	6.44029e-11		0.0590289	4.90471e-11		0.0590289	2.03982e-11
0.0619228	7.71715e-10		0.0619228	5.86533e-10		0.0619228	2.33736e-10		0.0619228	1.26358e-10		0.0619228	9.34261e-11		0.0619228	2.63465e-11
0.0648167	7.45827e-10		0.0648167	5.87694e-10		0.0648167	2.29591e-10		0.0648167	2.70066e-10		0.0648167	1.95276e-10		0.0648167	3.61931e-11
0.0677106	7.23715e-10		0.0677106	5.94843e-10		0.0677106	2.25501e-10		0.0677106	5.69074e-10		0.0677106	4.17384e-10		0.0677106	5.52293e-11
0.0706045	7.06329e-10		0.0706045	6.0736e-10		0.0706045	2.21243e-10		0.0706045	1.16983e-09		0.0706045	8.58698e-10		0.0706045	9.56308e-11
0.0734984	6.9441e-10		0.0734984	6.244e-10		0.0734984	2.16219e-10		0.0734984	2.34524e-09		0.0734984	1.64601e-09		0.0734984	1.84121e-10
0.0763923	6.88322e-10		0.0763923	6.44847e-10		0.0763923	2.10576e-10		0.0763923	4.52185e-09		0.0763923	2.96112e-09		0.0763923	3.69905e-10
0.0792862	6.88015e-10		0.0792862	6.67502e-10		0.0792862	2.04666e-10		0.0792862	8.22654e-09		0.0792862	5.22792e-09		0.0792862	7.35279e-10
0.0821801	6.93225e-10		0.0821801	6.91169e-10		0.0821801	1.98472e-10		0.0821801	1.38257e-08		0.0821801	8.95242e-09		0.0821801	1.39553e-09
0.085074	7.03749e-10		0.085074	7.14715e-10		0.085074	1.92027e-10		0.085074	2.11256e-08		0.085074	1.4349e-08		0.085074	2.46679e-09
0.085074	7.03749e-10		0.085074	7.14715e-10		0.085074	1.92027e-10		0.085074	2.11256e-08		0.085074	1.4349e-08		0.085074	2.46679e-09
0.0879678	7.19453e-10		0.0879678	7.3719e-10		0.0879678	1.8567e-10		0.0879678	2.92857e-08		0.0879678	2.11474e-08		0.0879678	4.23146e-09
0.0908617	7.39893e-10		0.0908617	7.5786e-10		0.0908617	1.80238e-10		0.0908617	3.70985e-08		0.0908617	2.85323e-08		0.0908617	7.08269e-09
0.0937556	7.6445e-10		0.0937556	7.76502e-10		0.0937556	1.79479e-10		0.0937556	3.81003e-08		0.0937556	3.35737e-08		0.0937556	1.12834e-08
0.0966495	7.92383e-10		0.0966495	7.92416e-10		0.0966495	1.9482e-10		0.0966495	3.67315e-08		0.0966495	3.35182e-08		0.0966495	1.68765e-08
0.0995434	8.22799e-10		0.0995434	8.05218e-10		0.0995434	2.53287e-10		0.0995434	3.20783e-08		0.0995434	3.0197e-08		0.0995434	2.35462e-08
0.102437	8.54958e-10		0.102437	8.15439e-10		0.102437	4.13075e-10		0.102437	2.77598e-08		0.102437	2.65798e-08		0.102437	3.05748e-08
0.105331	8.88128e-10		0.105331	8.23396e-10		0.105331	7.69356e-10		0.105331	2.41189e-08		0.105331	2.34981e-08		0.105331	3.50843e-08
0.108225	9.2169e-10		0.108225	8.2955e-10		0.108225	1.47693e-09		0.108225	2.1086e-08		0.108225	2.09792e-08		0.108225	3.50566e-08
0.111119	9.55452e-10		0.111119	8.34252e-10		0.111119	2.77489e-09		0.111119	1.85842e-08		0.111119	1.89656e-08		0.111119	3.24342e-08
0.114013	9.88047e-10		0.114013	8.37958e-10		0.114013	4.96452e-09		0.114013	1.65284e-08		0.114013	1.7359e-08		0.114013	2.93945e-08
0.116907	1.01878e-09		0.116907	8.41332e-10		0.116907	8.31722e-09		0.116907	1.48425e-08		0.116907	1.60698e-08		0.116907	2.668e-08
0.119801	1.04721e-09		0.119801	8.44999e-10		0.119801	1.30167e-08		0.119801	1.34611e-08		0.119801	1.50387e-08		0.119801	2.44236e-08
0.122695	1.07247e-09		0.122695	8.49422e-10		0.122695	1.90624e-08		0.122695	1.23326e-08		0.122695	1.42191e-08		0.122695	2.26201e-08
0.125588	1.09478e-09		0.125588	8.55026e-10		0.125588	2.61774e-08		0.125588	1.14129e-08		0.125588	1.35726e-08		0.125588	2.11852e-08
0.128482	1.11406e-09		0.128482	8.62291e-10		0.128482	3.38925e-08		0.128482	1.0664e-08		0.128482	1.30627e-08		0.128482	2.00481e-08
0.131376	1.13029e-09		0.131376	8.71618e-10		0.131376	4.15225e-08		0.131376	1.00558e-08		0.131376	1.2661e-08		0.131376	1.91565e-08
0.13427	1.14354e-09		0.13427	8.83453e-10		0.13427	4.6083e-08		0.13427	9.56487e-09		0.13427	1.23448e-08		0.13427	1.84518e-08
0.137164	1.15394e-09		0.137164	8.97678e-10		0.137164	4.56678e-08		0.137164	9.17168e-09		0.137164	1.2096e-08		0.137164	1.78917e-08
0.140058	1.16166e-09		0.140058	9.14187e-10		0.140058	4.21297e-08		0.140058	8.8597e-09		0.140058	1.18996e-08		0.140058	1.74514e-08
0.142952	1.16698e-09		0.142952	9.33533e-10		0.142952	3.7381e-08		0.142952	8.61456e-09		0.142952	1.17434e-08		0.142952	1.71111e-08
0.145846	1.17017e-09		0.145846	9.55299e-10		0.145846	3.25832e-08		0.145846	8.42271e-09		0.145846	1.16178e-08		0.145846	1.68484e-08
0.14874	1.1715e-09		0.14874	9.79246e-10		0.14874	2.82724e-08		0.14874	8.27274e-09		0.14874	1.15152e-08		0.14874	1.66461e-08
0.151633	1.17129e-09		0.151633	1.00511e-09		0.151633	2.44917e-08		0.151633	8.15598e-09		0.151633	1.14296e-08		0.151633	1.64906e-08
0.154527	1.16986e-09		0.154527	1.03276e-09		0.154527	2.11933e-08		0.154527	8.06524e-09		0.154527	1.13564e-08		0.154527	1.6371e-08
0.157421	1.16753e-09		0.157421	1.0619e-09		0.157421	1.83708e-08		0.157421	7.99461e-09		0.157421	1.12923e-08		0.157421	1.62787e-08
0.160315	1.16467e-09		0.160315	1.09224e-09		0.160315	1.59942e-08		0.160315	7.9393e-09		0.160315	1.12348e-08		0.160315	1.62071e-08
0.163209	1.16151e-09		0.163209	1.12345e-09		0.163209	1.40111e-08		0.163209	7.89552e-09		0.163209	1.11822e-08		0.163209	1.61511e-08
0.166103	1.15826e-09		0.166103	1.15476e-09		0.166103	1.23572e-08		0.166103	7.8606e-09		0.166103	1.11334e-08		0.166103	1.61061e-08
0.166103	1.15826e-09		0.166103	1.15476e-09		0.166103	1.23572e-08		0.166103	7.8606e-09		0.166103	1.11334e-08		0.166103	1.61061e-08
0.168997	1.15524e-09		0.168997	1.18668e-09		0.168997	1.09753e-08		0.168997	7.83189e-09		0.168997	1.10893e-08		0.168997	1.60655e-08
0.171891	1.15268e-09		0.171891	1.21904e-09		0.171891	9.82063e-09		0.171891	7.80711e-09		0.171891	1.10503e-08		0.171891	1.60244e-08
0.174785	1.15109e-09		0.174785	1.25122e-09		0.174785	8.85437e-09		0.174785	7.7851e-09		0.174785	1.10154e-08		0.174785	1.5982e-08
0.177678	1.15062e-09		0.177678	1.28295e-09		0.177678	8.04559e-09		0.177678	7.76501e-09		0.177678	1.09839e-08		0.177678	1.5938e-08
0.180572	1.15106e-09		0.180572	1.31437e-09		0.180572	7.37417e-09		0.180572	7.74622e-09		0.180572	1.0955e-08		0.180572	1.58922e-08
0.183466	1.15254e-09		0.183466	1.34496e-09		0.183466	6.82357e-09		0.183466	7.72827e-09		0.183466	1.09285e-08		0.183466	1.58444e-08
0.18636	1.15521e-09		0.18636	1.37459e-09		0.18636	6.3774e-09		0.18636	7.71086e-09		0.18636	1.09039e-08		0.18636	1.57946e-08
0.189254	1.15923e-09		0.189254	1.4032e-09		0.189254	6.0175e-09		0.189254	7.69378e-09		0.189254	1.0881e-08		0.189254	1.57426e-08
0.192148	1.16476e-09		0.192148	1.43041e-09		0.192148	5.72984e-09		0.192148	7.6769e-09		0.192148	1.08596e-08		0.192148	1.56891e-08
0.195042	1.17183e-09		0.195042	1.457e-09		0.195042	5.50506e-09		0.195042	7.66013e-09		0.195042	1.08396e-08		0.195042	1.56344e-08
0.197936	1.18052e-09		0.197936	1.48325e-09		0.197936	5.33336e-09		0.197936	7.64344e-09		0.197936	1.0821e-08		0.197936	1.55787e-08
0.20083	1.19087e-09		0.20083	1.50837e-09		0.20083	5.2061e-09		0.20083	7.6268e-09		0.20083	1.08036e-08		0.20083	1.5522e-08
0.203723	1.20285e-09		0.203723	1.5321e-09		0.203723	5.11573e-09		0.203723	7.6102e-09		0.203723	1.07874e-08		0.203723	1.54644e-08
0.206617	1.21677e-09		0.206617	1.55498e-09		0.206617	5.05572e-09		0.206617	7.59366e-09		0.206617	1.07724e-08		0.206617	1.54061e-08
0.209511	1.23248e-09		0.209511	1.5775e-09		0.209511	5.02046e-09		0.209511	7.5772e-09		0.209511	1.07587e-08		0.209511	1.53471e-08
0.212405	1.25001e-09		0.212405	1.59958e-09		0.212405	5.00649e-09		0.212405	7.56089e-09		0.212405	1.07465e-08		0.212405	1.52875e-08
0.215299	1.26927e-09		0.215299	1.62125e-09		0.215299	5.01275e-09		0.215299	7.54483e-09		0.215299	1.07358e-08		0.215299	1.52273e-08
0.215299	1.26927e-09		0.215299	1.62125e-09		0.215299	5.01275e-09		0.215299	7.54483e-09		0.215299	1.07358e-08		0.215299	1.52273e-08
0.218193	1.2904e-09		0.218193	1.64333e-09		0.218193	5.0321e-09		0.218193	7.52863e-09		0.218193	1.07254e-08		0.218193	1.51664e-08
0.221087	1.31404e-09		0.221087	1.66641e-09		0.221087	5.05438e-09		0.221087	7.51166e-09		0.221087	1.07132e-08		0.221087	1.51049e-08
0.223981	1.33974e-09		0.223981	1.69093e-09		0.223981	5.07457e-09		0.223981	7.49369e-09		0.223981	1.0698e-08		0.223981	1.50427e-08
0.226875	1.36728e-09		0.226875	1.71763e-09		0.226875	5.09034e-09		0.226875	7.47471e-09		0.226875	1.06795e-08		0.226875	1.49798e-08
0.229768	1.39725e-09		0.229768	1.74642e-09		0.229768	5.10124e-09		0.229768	7.45478e-09		0.229768	1.06577e-08		0.229768	1.49162e-08
0.232662	1.42925e-09		0.232662	1.77715e-09		0.232662	5.10763e-09		0.232662	7.43403e-09		0.232662	1.06331e-08		0.232662	1.48517e-08
0.235556	1.46279e-09		0.235556	1.81038e-09		0.235556	5.11011e-09		0.235556	7.41257e-09		0.235556	1.06065e-08		0.235556	1.47865e-08
0.23845	1.4982e-09		0.23845	1.84637e-09		0.23845	5.10928e-09		0.23845	7.3905e-09		0.23845	1.05779e-08		0.23845	1.47203e-08
0.241344	1.53554e-09		0.241344	1.88527e-09		0.241344	5.1057e-09		0.241344	7.36788e-09		0.241344	1.05478e-08		0.241344	1.4653e-08
0.244238	1.5747e-09		0.244238	1.92722e-09		0.244238	5.09983e-09		0.244238	7.34477e-09		0.244238	1.05163e-08		0.244238	1.4585e-08
0.247132	1.61552e-09		0.247132	1.97253e-09		0.247132	5.09204e-09		0.247132	7.3212e-09		0.247132	1.04836e-08		0.247132	1.4517e-08
0.250026	1.65793e-09		0.250026	2.02147e-09		0.250026	5.08266e-09		0.250026	7.29721e-09		0.250026	1.04499e-08		0.250026	1.44495e-08
0.25292	1.70214e-09		0.25292	2.07398e-09		0.25292	5.07194e-09		0.25292	7.27298e-09		0.25292	1.04153e-08		0.25292	1.43825e-08
0.255814	1.74815e-09		0.255814	2.13009e-09		0.255814	5.0601e-09		0.255814	7.24872e-09		0.255814	1.038e-08		0.255814	1.43159e-08
0.258707	1.79568e-09		0.258707	2.19036e-09		0.258707	5.04732e-09		0.258707	7.22443e-09		0.258707	1.0344e-08		0.258707	1.42497e-08
0.261601	1.84471e-09		0.261601	2.25545e-09		0.261601	5.03376e-09		0.261601	7.20015e-09		0.261601	1.03074e-08		0.261601	1.41839e-08
0.264495	1.89553e-09		0.264495	2.32614e-09		0.264495	5.01953e-09		0.264495	7.17588e-09		0.264495	1.02702e-08		0.264495	1.41185e-08
0.267389	1.94843e-09		0.267389	2.40324e-09		0.267389	5.00476e-09		0.267389	7.15164e-09		0.267389	1.02327e-08		0.267389	1.40534e-08
0.270283	2.00326e-09		0.270283	2.48754e-09		0.270283	4.98951e-09		0.270283	7.12744e-09		0.270283	1.01947e-08		0.270283	1.39887e-08
0.273177	2.05964e-09		0.273177	2.57967e-09		0.273177	4.97388e-09		0.273177	7.10329e-09		0.273177	1.01563e-08		0.273177	1.39243e-08
0.276071	2.11766e-09		0.276071	2.68012e-09		0.276071	4.95791e-09		0.276071	7.07919e-09		0.276071	1.01176e-08		0.276071	1.38601e-08
0.278965	2.17754e-09		0.278965	2.78946e-09		0.278965	4.94165e-09		0.278965	7.05517e-09		0.278965	1.00786e-08		0.278965	1.37962e-08
0.281859	2.23954e-09		0.281859	2.90851e-09		0.281859	4.92516e-09		0.281859	7.03122e-09		0.281859	1.00393e-08		0.281859	1.37324e-08
0.284752	2.30398e-09		0.284752	3.03811e-09		0.284752	4.90846e-09		0.284752	7.00735e-09		0.284752	9.99968e-09		0.284752	1.36687e-08
0.287646	2.37121e-09		0.287646	3.17848e-09		0.287646	4.89159e-09		0.287646	6.98356e-09		0.287646	9.95973e-09		0.287646	1.36054e-08
0.29054	2.44166e-09		0.29054	3.32962e-09		0.29054	4.87458e-09		0.29054	6.95984e-09		0.29054	9.91953e-09		0.29054	1.35427e-08
0.293434	2.51575e-09		0.293434	3.49186e-09		0.293434	4.85747e-09		0.293434	6.9362e-09		0.293434	9.8792e-09		0.293434	1.3481e-08
0.296328	2.59413e-09		0.296328	3.66567e-09		0.296328	4.84027e-09		0.296328	6.91262e-09		0.296328	9.83875e-09		0.296328	1.34203e-08
0.299222	2.67738e-09		0.299222	3.85201e-09		0.299222	4.823e-09		0.299222	6.88909e-09		0.299222	9.79818e-09		0.299222	1.33606e-08
0.302116	2.76602e-09		0.302116	4.05146e-09		0.302116	4.80567e-09		0.302116	6.8656e-09		0.302116	9.75746e-09		0.302116	1.3302e-08
0.30501	2.86077e-09		0.30501	4.26395e-09		0.30501	4.78815e-09		0.30501	6.84213e-09		0.30501	9.71658e-09		0.30501	1.32444e-08
0.307904	2.96247e-09		0.307904	4.48968e-09		0.307904	4.77028e-09		0.307904	6.81866e-09		0.307904	9.67553e-09		0.307904	1.31877e-08
0.310797	3.07207e-09		0.310797	4.7289e-09		0.310797	4.7521e-09		0.310797	6.79515e-09		0.310797	9.63429e-09		0.310797	1.3132e-08
0.313691	3.19086e-09		0.313691	4.98232e-09		0.313691	4.73369e-09		0.313691	6.77155e-09		0.313691	9.59285e-09		0.313691	1.30769e-08
0.313691	3.19086e-09		0.313691	4.98232e-09		0.313691	4.73369e-09		0.313691	6.77155e-09		0.313691	9.59285e-09		0.313691	1.30769e-08
0.316585	3.32005e-09		0.316585	5.25029e-09		0.316585	4.71521e-09		0.316585	6.7476e-09		0.316585	9.55123e-09		0.316585	1.30206e-08
0.319479	3.46076e-09		0.319479	5.53297e-09		0.319479	4.69678e-09		0.319479	6.72305e-09		0.319479	9.50943e-09		0.319479	1.29617e-08
0.322373	3.61451e-09		0.322373	5.83088e-09		0.322373	4.67843e-09		0.322373	6.6979e-09		0.322373	9.46744e-09		0.322373	1.29002e-08
0.325267	3.78256e-09		0.325267	6.1441e-09		0.325267	4.66017e-09		0.325267	6.6725e-09		0.325267	9.42523e-09		0.325267	1.28362e-08
0.328161	3.96611e-09		0.328161	6.47341e-09		0.328161	4.642e-09		0.328161	6.64718e-09		0.328161	9.38277e-09		0.328161	1.27701e-08
0.331055	4.16615e-09		0.331055	6.81889e-09		0.331055	4.62393e-09		0.331055	6.62192e-09		0.331055	9.34002e-09		0.331055	1.27024e-08
0.333949	4.38389e-09		0.333949	7.17991e-09		0.333949	4.606e-09		0.333949	6.59673e-09		0.333949	9.29694e-09		0.333949	1.26337e-08
0.336842	4.62094e-09		0.336842	7.55666e-09		0.336842	4.58821e-09		0.336842	6.57161e-09		0.336842	9.25348e-09		0.336842	1.2564e-08
0.339736	4.87857e-09		0.339736	7.95051e-09		0.339736	4.57058e-09		0.339736	6.54655e-09		0.339736	9.20957e-09		0.339736	1.24937e-08
0.34263	5.15785e-09		0.34263	8.36232e-09		0.34263	4.55313e-09		0.34263	6.52155e-09		0.34263	9.16546e-09		0.34263	1.24228e-08
0.345524	5.46011e-09		0.345524	8.79308e-09		0.345524	4.53589e-09		0.345524	6.4966e-09		0.345524	9.12144e-09		0.345524	1.23515e-08
0.348418	5.78716e-09		0.348418	9.245e-09		0.348418	4.51887e-09		0.348418	6.47171e-09		0.348418	9.0775e-09		0.348418	1.22797e-08
0.351312	6.14038e-09		0.351312	9.71954e-09		0.351312	4.50208e-09		0.351312	6.44687e-09		0.351312	9.03366e-09		0.351312	1.22076e-08
0.354206	6.5206e-09		0.354206	1.02194e-08		0.354206	4.48554e-09		0.354206	6.42208e-09		0.354206	8.98992e-09		0.354206	1.21353e-08
0.3571	6.9294e-09		0.3571	1.07491e-08		0.3571	4.46928e-09		0.3571	6.39733e-09		0.3571	8.9463e-09		0.3571	1.20628e-08
0.359994	7.36834e-09		0.359994	1.13131e-08		0.359994	4.45332e-09		0.359994	6.37262e-09		0.359994	8.90281e-09		0.359994	1.199e-08
0.362887	7.83903e-09		0.362887	1.19171e-08		0.362887	4.43767e-09		0.362887	6.34794e-09		0.362887	8.85947e-09		0.362887	1.19171e-08
0.365781	8.34282e-09		0.365781	1.25674e-08		0.365781	4.42237e-09		0.365781	6.3233e-09		0.365781	8.81632e-09		0.365781	1.18441e-08
0.368675	8.88054e-09		0.368675	1.32707e-08		0.368675	4.40744e-09		0.368675	6.29868e-09		0.368675	8.77339e-09		0.368675	1.17715e-08
0.371569	9.45353e-09		0.371569	1.40353e-08		0.371569	4.39293e-09		0.371569	6.27409e-09		0.371569	8.73071e-09		0.371569	1.17e-08
0.374463	1.00636e-08		0.374463	1.4868e-08		0.374463	4.3789e-09		0.374463	6.24951e-09		0.374463	8.68832e-09		0.374463	1.16296e-08
0.377357	1.07136e-08		0.377357	1.57718e-08		0.377357	4.36545e-09		0.377357	6.22494e-09		0.377357	8.64626e-09		0.377357	1.15603e-08
0.380251	1.14073e-08		0.380251	1.67474e-08		0.380251	4.35278e-09		0.380251	6.20034e-09		0.380251	8.60456e-09		0.380251	1.14924e-08
0.383145	1.21493e-08		0.383145	1.77955e-08		0.383145	4.34114e-09		0.383145	6.17561e-09		0.383145	8.5632e-09		0.383145	1.14257e-08
0.386039	1.29444e-08		0.386039	1.89195e-08		0.386039	4.33002e-09		0.386039	6.15088e-09		0.386039	8.52216e-09		0.386039	1.13603e-08
0.388932	1.37981e-08		0.388932	2.01238e-08		0.388932	4.31892e-09		0.388932	6.12656e-09		0.388932	8.48162e-09		0.388932	1.12963e-08
0.391826	1.47164e-08		0.391826	2.14132e-08		0.391826	4.30805e-09		0.391826	6.10278e-09		0.391826	8.44149e-09		0.391826	1.12337e-08
0.39472	1.57057e-08		0.39472	2.27914e-08		0.39472	4.29751e-09		0.39472	6.07957e-09		0.39472	8.40158e-09		0.39472	1.11725e-08
0.397614	1.6772e-08		0.397614	2.42609e-08		0.397614	4.2873e-09		0.397614	6.05693e-09		0.397614	8.36196e-09		0.397614	1.11127e-08
0.400508	1.79196e-08		0.400508	2.58289e-08		0.400508	4.27732e-09		0.400508	6.03489e-09		0.400508	8.32268e-09		0.400508	1.10545e-08
0.403402	1.91518e-08		0.403402	2.75115e-08		0.403402	4.26738e-09		0.403402	6.01353e-09		0.403402	8.2837e-09		0.403402	1.0998e-08
0.403402	1.91518e-08		0.403402	2.75115e-08		0.403402	4.26738e-09		0.403402	6.01353e-09		0.403402	8.2837e-09		0.403402	1.0998e-08
0.406296	2.04688e-08		0.406296	2.9336e-08		0.406296	4.2576e-09		0.406296	5.99231e-09		0.406296	8.24464e-09		0.406296	1.09419e-08
0.40919	2.18702e-08		0.40919	3.13216e-08		0.40919	4.2481e-09		0.40919	5.9707e-09		0.40919	8.20509e-09		0.40919	1.08852e-08
0.412084	2.33583e-08		0.412084	3.34962e-08		0.412084	4.23862e-09		0.412084	5.94875e-09		0.412084	8.16504e-09		0.412084	1.08278e-08
0.414977	2.49392e-08		0.414977	3.59171e-08		0.414977	4.22902e-09		0.414977	5.92648e-09		0.414977	8.12457e-09		0.414977	1.07696e-08
0.417871	2.66233e-08		0.417871	3.86576e-08		0.417871	4.21922e-09		0.417871	5.90388e-09		0.417871	8.08371e-09		0.417871	1.07108e-08
0.420765	2.84223e-08		0.420765	4.18434e-08		0.420765	4.20917e-09		0.420765	5.88096e-09		0.420765	8.04252e-09		0.420765	1.06512e-08
0.423659	3.03439e-08		0.423659	4.5655e-08		0.423659	4.19883e-09		0.423659	5.85773e-09		0.423659	8.00102e-09		0.423659	1.05911e-08
0.426553	3.24004e-08		0.426553	5.03304e-08		0.426553	4.18819e-09		0.426553	5.83424e-09		0.426553	7.95926e-09		0.426553	1.05305e-08
0.429447	3.46183e-08		0.429447	5.61351e-08		0.429447	4.17724e-09		0.429447	5.81052e-09		0.429447	7.91729e-09		0.429447	1.04695e-08
0.432341	3.70567e-08		0.432341	6.29559e-08		0.432341	4.16599e-09		0.432341	5.78664e-09		0.432341	7.87516e-09		0.432341	1.04083e-08
0.435235	3.98024e-08		0.435235	7.02909e-08		0.435235	4.15443e-09		0.435235	5.76264e-09		0.435235	7.83285e-09		0.435235	1.03469e-08
0.438129	4.29448e-08		0.438129	7.73654e-08		0.438129	4.14256e-09		0.438129	5.73859e-09		0.438129	7.79036e-09		0.438129	1.02854e-08
0.441023	4.66565e-08		0.441023	8.37746e-08		0.441023	4.13035e-09		0.441023	5.71453e-09		0.441023	7.74771e-09		0.441023	1.02238e-08
0.443916	5.12573e-08		0.443916	8.94852e-08		0.443916	4.1178e-09		0.443916	5.69053e-09		0.443916	7.70495e-09		0.443916	1.01618e-08
0.44681	5.70386e-08		0.44681	9.43794e-08		0.44681	4.10487e-09		0.44681	5.66648e-09		0.44681	7.66211e-09		0.44681	1.00997e-08
0.449704	6.3711e-08		0.449704	9.84863e-08		0.449704	4.09153e-09		0.449704	5.6423e-09		0.449704	7.61922e-09		0.449704	1.00374e-08
0.452598	7.02946e-08		0.452598	1.01882e-07		0.452598	4.07773e-09		0.452598	5.61802e-09		0.452598	7.57631e-09		0.452598	9.97511e-09
0.455492	7.62569e-08		0.455492	1.04608e-07		0.455492	4.06343e-09		0.455492	5.59365e-09		0.455492	7.53339e-09		0.455492	9.91282e-09
0.458386	8.1554e-08		0.458386	1.0658e-07		0.458386	4.04853e-09		0.458386	5.56922e-09		0.458386	7.4905e-09		0.458386	9.85061e-09
0.46128	8.60265e-08		0.46128	1.07882e-07		0.46128	4.03328e-09		0.46128	5.54474e-09		0.46128	7.44764e-09		0.46128	9.78854e-09
0.464174	8.96493e-08		0.464174	1.08819e-07		0.464174	4.01804e-09		0.464174	5.52022e-09		0.464174	7.40482e-09		0.464174	9.72666e-09
0.467068	9.24589e-08		0.467068	1.09083e-07		0.467068	4.00284e-09		0.467068	5.49568e-09		0.467068	7.36207e-09		0.467068	9.66502e-09
0.469961	9.44077e-08		0.469961	1.08308e-07		0.469961	3.98772e-09		0.469961	5.47114e-09		0.469961	7.31936e-09		0.469961	9.60367e-09
0.472855	9.55919e-08		0.472855	1.06937e-07		0.472855	3.97268e-09		0.472855	5.44659e-09		0.472855	7.27671e-09		0.472855	9.54265e-09
0.475749	9.61128e-08		0.475749	1.05049e-07		0.475749	3.95773e-09		0.475749	5.42206e-09		0.475749	7.2341e-09		0.475749	9.48199e-09
0.478643	9.60054e-08		0.478643	1.02675e-07		0.478643	3.94287e-09		0.478643	5.39756e-09		0.478643	7.19172e-09		0.478643	9.4217e-09
0.481537	9.54223e-08		0.481537	1.00109e-07		0.481537	3.92811e-09		0.481537	5.37308e-09		0.481537	7.14976e-09		0.481537	9.36182e-09
0.484431	9.44403e-08		0.484431	9.7396e-08		0.484431	3.91343e-09		0.484431	5.34866e-09		0.484431	7.10823e-09		0.484431	9.30237e-09
0.487325	9.30209e-08		0.487325	9.45759e-08		0.487325	3.89885e-09		0.487325	5.32428e-09		0.487325	7.06715e-09		0.487325	9.24339e-09
0.490219	9.12109e-08		0.490219	9.1655e-08		0.490219	3.88436e-09		0.490219	5.29997e-09		0.490219	7.02654e-09		0.490219	9.18489e-09
0.493113	8.91245e-08		0.493113	8.86452e-08		0.493113	3.86995e-09		0.493113	5.27573e-09		0.493113	6.98642e-09		0.493113	9.1269e-09
0.496006	8.68238e-08		0.496006	8.55853e-08		0.496006	3.85562e-09		0.496006	5.25156e-09		0.496006	6.94679e-09		0.496006	9.06942e-09
0.4989	8.43496e-08		0.4989	8.25038e-08		0.4989	3.84138e-09		0.4989	5.22747e-09		0.4989	6.90767e-09		0.4989	9.01247e-09
0.501794	8.17465e-08		0.501794	7.9418e-08		0.501794	3.82721e-09		0.501794	5.20347e-09		0.501794	6.86908e-09		0.501794	8.95606e-09
0.504688	7.90738e-08		0.504688	7.63507e-08		0.504688	3.81313e-09		0.504688	5.17954e-09		0.504688	6.83103e-09		0.504688	8.90016e-09
0.507582	7.63175e-08		0.507582	7.33306e-08		0.507582	3.79913e-09		0.507582	5.1557e-09		0.507582	6.79352e-09		0.507582	8.84479e-09
0.510476	7.34864e-08		0.510476	7.03611e-08		0.510476	3.78522e-09		0.510476	5.13196e-09		0.510476	6.75657e-09		0.510476	8.78999e-09
0.51337	7.06508e-08		0.51337	6.74386e-08		0.51337	3.7714e-09		0.51337	5.1083e-09		0.51337	6.72016e-09		0.51337	8.73584e-09
0.516264	6.78269e-08		0.516264	6.45834e-08		0.516264	3.75769e-09		0.516264	5.08473e-09		0.516264	6.68429e-09		0.516264	8.68234e-09
0.519158	6.50224e-08		0.519158	6.18043e-08		0.519158	3.7441e-09		0.519158	5.06126e-09		0.519158	6.64895e-09		0.519158	8.62952e-09
0.522051	6.22611e-08		0.522051	5.91046e-08		0.522051	3.73067e-09		0.522051	5.03788e-09		0.522051	6.6146e-09		0.522051	8.5774e-09
0.524945	5.9538e-08		0.524945	5.64966e-08		0.524945	3.71741e-09		0.524945	5.0146e-09		0.524945	6.58184e-09		0.524945	8.52604e-09
0.524945	5.9538e-08		0.524945	5.64966e-08		0.524945	3.71741e-09		0.524945	5.0146e-09		0.524945	6.58184e-09		0.524945	8.52604e-09
0.527839	5.68684e-08		0.527839	5.3987e-08		0.527839	3.70422e-09		0.527839	4.99143e-09		0.527839	6.54993e-09		0.527839	8.47523e-09
0.530733	5.42781e-08		0.530733	5.15687e-08		0.530733	3.69095e-09		0.530733	4.96837e-09		0.530733	6.51803e-09		0.530733	8.42476e-09
0.533627	5.17785e-08		0.533627	4.92419e-08		0.533627	3.67758e-09		0.533627	4.94544e-09		0.533627	6.48613e-09		0.533627	8.3746e-09
0.536521	4.93732e-08		0.536521	4.70189e-08		0.536521	3.66414e-09		0.536521	4.92263e-09		0.536521	6.45422e-09		0.536521	8.32474e-09
0.539415	4.70571e-08		0.539415	4.49026e-08		0.539415	3.65067e-09		0.539415	4.89995e-09		0.539415	6.42225e-09		0.539415	8.27519e-09
0.542309	4.48245e-08		0.542309	4.28819e-08		0.542309	3.63716e-09		0.542309	4.87742e-09		0.542309	6.3902e-09		0.542309	8.22592e-09
0.545203	4.2681e-08		0.545203	4.09495e-08		0.545203	3.62358e-09		0.545203	4.85502e-09		0.545203	6.35803e-09		0.545203	8.17695e-09
0.548096	4.06326e-08		0.548096	3.9106e-08		0.548096	3.60994e-09		0.548096	4.83277e-09		0.548096	6.32568e-09		0.548096	8.12821e-09
0.55099	3.86791e-08		0.55099	3.73538e-08		0.55099	3.59621e-09		0.55099	4.81067e-09		0.55099	6.29312e-09		0.55099	8.07966e-09
0.553884	3.68235e-08		0.553884	3.56851e-08		0.553884	3.58239e-09		0.553884	4.78873e-09		0.553884	6.26028e-09		0.553884	8.03128e-09
0.556778	3.50527e-08		0.556778	3.40887e-08		0.556778	3.56856e-09		0.556778	4.7669e-09		0.556778	6.2271e-09		0.556778	7.98309e-09
0.559672	3.33562e-08		0.559672	3.2564e-08		0.559672	3.55483e-09		0.559672	4.74513e-09		0.559672	6.19351e-09		0.559672	7.93508e-09
0.562566	3.17388e-08		0.562566	3.11163e-08		0.562566	3.54117e-09		0.562566	4.72343e-09		0.562566	6.15944e-09		0.562566	7.88726e-09
0.56546	3.02122e-08		0.56546	2.97516e-08		0.56546	3.52758e-09		0.56546	4.7018e-09		0.56546	6.1252e-09		0.56546	7.83964e-09
0.568354	2.87656e-08		0.568354	2.84573e-08		0.568354	3.51405e-09		0.568354	4.68022e-09		0.568354	6.09115e-09		0.568354	7.79224e-09
0.571248	2.73845e-08		0.571248	2.72189e-08		0.571248	3.50056e-09		0.571248	4.65871e-09		0.571248	6.05729e-09		0.571248	7.74507e-09
0.574142	2.60744e-08		0.574142	2.60417e-08		0.574142	3.48712e-09		0.574142	4.63726e-09		0.574142	6.02362e-09		0.574142	7.69815e-09
0.577035	2.48406e-08		0.577035	2.49273e-08		0.577035	3.47373e-09		0.577035	4.61588e-09		0.577035	5.99013e-09		0.577035	7.65149e-09
0.579929	2.36669e-08		0.579929	2.38768e-08		0.579929	3.46039e-09		0.579929	4.59457e-09		0.579929	5.9568e-09		0.579929	7.60511e-09
0.582823	2.25377e-08		0.582823	2.28744e-08		0.582823	3.44709e-09		0.582823	4.57333e-09		0.582823	5.92364e-09		0.582823	7.55904e-09
0.585717	2.14599e-08		0.585717	2.1908e-08		0.585717	3.43384e-09		0.585717	4.55217e-09		0.585717	5.89063e-09		0.585717	7.51329e-09
0.588611	2.04399e-08		0.588611	2.09862e-08		0.588611	3.42064e-09		0.588611	4.53108e-09		0.588611	5.85777e-09		0.588611	7.46785e-09
0.591505	1.94871e-08		0.591505	2.01138e-08		0.591505	3.40749e-09		0.591505	4.51009e-09		0.591505	5.82505e-09		0.591505	7.42274e-09
0.594399	1.859e-08		0.594399	1.92952e-08		0.594399	3.39438e-09		0.594399	4.48918e-09		0.594399	5.79245e-09		0.594399	7.37799e-09
0.597293	1.77325e-08		0.597293	1.85391e-08		0.597293	3.38129e-09		0.597293	4.46836e-09		0.597293	5.75996e-09		0.597293	7.33361e-09
0.600186	1.69157e-08		0.600186	1.78255e-08		0.600186	3.36822e-09		0.600186	4.44765e-09		0.600186	5.72756e-09		0.600186	7.28961e-09
0.60308	1.61444e-08		0.60308	1.71323e-08		0.60308	3.35514e-09		0.60308	4.42704e-09		0.60308	5.69524e-09		0.60308	7.246e-09
0.605974	1.54222e-08		0.605974	1.64602e-08		0.605974	3.34202e-09		0.605974	4.40653e-09		0.605974	5.66297e-09		0.605974	7.20278e-09
0.608868	1.47521e-08		0.608868	1.58135e-08		0.608868	3.32899e-09		0.608868	4.38615e-09		0.608868	5.63071e-09		0.608868	7.15995e-09
0.611762	1.41305e-08		0.611762	1.51968e-08		0.611762	3.31621e-09		0.611762	4.36588e-09		0.611762	5.59869e-09		0.611762	7.11752e-09
0.614656	1.35319e-08		0.614656	1.46129e-08		0.614656	3.30367e-09		0.614656	4.34573e-09		0.614656	5.56718e-09		0.614656	7.07547e-09
0.61755	1.29435e-08		0.61755	1.40651e-08		0.61755	3.29136e-09		0.61755	4.3257e-09		0.61755	5.53623e-09		0.61755	7.0338e-09
0.620444	1.2373e-08		0.620444	1.35556e-08		0.620444	3.27929e-09		0.620444	4.3058e-09		0.620444	5.50584e-09		0.620444	6.99251e-09
0.623338	1.18266e-08		0.623338	1.30797e-08		0.623338	3.26743e-09		0.623338	4.28604e-09		0.623338	5.47603e-09		0.623338	6.95165e-09
0.626231	1.13111e-08		0.626231	1.26206e-08		0.626231	3.25578e-09		0.626231	4.26641e-09		0.626231	5.44683e-09		0.626231	6.9113e-09
0.629125	1.08296e-08		0.629125	1.21678e-08		0.629125	3.24435e-09		0.629125	4.24692e-09		0.629125	5.41826e-09		0.629125	6.87152e-09
0.632019	1.03867e-08		0.632019	1.17285e-08		0.632019	3.23313e-09		0.632019	4.22759e-09		0.632019	5.39035e-09		0.632019	6.83239e-09
0.634913	9.99012e-09		0.634913	1.1311e-08		0.634913	3.22214e-09		0.634913	4.20841e-09		0.634913	5.36314e-09		0.634913	6.79393e-09
0.637807	9.62726e-09		0.637807	1.0918e-08		0.637807	3.21142e-09		0.637807	4.1894e-09		0.637807	5.33672e-09		0.637807	6.75619e-09
0.640701	9.28119e-09		0.640701	1.05564e-08		0.640701	3.20103e-09		0.640701	4.17058e-09		0.640701	5.31124e-09		0.640701	6.71924e-09
0.643595	8.96274e-09		0.643595	1.02373e-08		0.643595	3.1911e-09		0.643595	4.15197e-09		0.643595	5.28697e-09		0.643595	6.68318e-09
0.643595	8.96274e-09		0.643595	1.02373e-08		0.643595	3.1911e-09		0.643595	4.15197e-09		0.643595	5.28697e-09		0.643595	6.68318e-09
0.646489	8.67323e-09		0.646489	9.954e-09		0.646489	3.18145e-09		0.646489	4.13354e-09		0.646489	5.26351e-09		0.646489	6.6478e-09
0.649383	8.40441e-09		0.649383	9.69189e-09		0.649383	3.17183e-09		0.649383	4.11525e-09		0.649383	5.24025e-09		0.649383	6.61273e-09
0.652277	8.15435e-09		0.652277	9.44612e-09		0.652277	3.1622e-09		0.652277	4.09708e-09		0.652277	5.21708e-09		0.652277	6.57781e-09
0.65517	7.91999e-09		0.65517	9.21296e-09		0.65517	3.1525e-09		0.65517	4.07904e-09		0.65517	5.19386e-09		0.65517	6.54292e-09
0.658064	7.69854e-09		0.658064	8.98765e-09		0.658064	3.1427e-09		0.658064	4.06111e-09		0.658064	5.17043e-09		0.658064	6.50793e-09
0.660958	7.48777e-09		0.660958	8.76748e-09		0.660958	3.13275e-09		0.660958	4.04329e-09		0.660958	5.1469e-09		0.660958	6.47273e-09
0.663852	7.28525e-09		0.663852	8.55253e-09		0.663852	3.12264e-09		0.663852	4.02558e-09		0.663852	5.12343e-09		0.663852	6.43721e-09
0.666746	7.08996e-09		0.666746	8.34312e-09		0.666746	3.11233e-09		0.666746	4.00799e-09		0.666746	5.1e-09		0.666746	6.40158e-09
0.66964	6.90165e-09		0.66964	8.13953e-09		0.66964	3.1018e-09		0.66964	3.99049e-09		0.66964	5.07659e-09		0.66964	6.36612e-09
0.672534	6.71952e-09		0.672534	7.94141e-09		0.672534	3.09103e-09		0.672534	3.97307e-09		0.672534	5.05318e-09		0.672534	6.33082e-09
0.675428	6.5438e-09		0.675428	7.74899e-09		0.675428	3.07999e-09		0.675428	3.95572e-09		0.675428	5.02977e-09		0.675428	6.29568e-09
0.678322	6.375e-09		0.678322	7.56396e-09		0.678322	3.06864e-09		0.678322	3.93844e-09		0.678322	5.00636e-09		0.678322	6.26068e-09
0.681215	6.21295e-09		0.681215	7.38747e-09		0.681215	3.05712e-09		0.681215	3.92124e-09		0.681215	4.98293e-09		0.681215	6.22582e-09
0.684109	6.0575e-09		0.684109	7.21933e-09		0.684109	3.04562e-09		0.684109	3.9041e-09		0.684109	4.95949e-09		0.684109	6.19107e-09
0.687003	5.90825e-09		0.687003	7.05918e-09		0.687003	3.03416e-09		0.687003	3.88703e-09		0.687003	4.93603e-09		0.687003	6.15642e-09
0.689897	5.76486e-09		0.689897	6.90605e-09		0.689897	3.02273e-09		0.689897	3.87003e-09		0.689897	4.91253e-09		0.689897	6.12184e-09
0.692791	5.6274e-09		0.692791	6.75945e-09		0.692791	3.01135e-09		0.692791	3.8531e-09		0.692791	4.889e-09		0.692791	6.08729e-09
0.695685	5.49612e-09		0.695685	6.61967e-09		0.695685	3.00001e-09		0.695685	3.83622e-09		0.695685	4.86542e-09		0.695685	6.05276e-09
0.698579	5.37053e-09		0.698579	6.48699e-09		0.698579	2.98872e-09		0.698579	3.81939e-09		0.698579	4.84179e-09		0.698579	6.01819e-09
0.701473	5.25004e-09		0.701473	6.36095e-09		0.701473	2.97749e-09		0.701473	3.8026e-09		0.701473	4.81811e-09		0.701473	5.98355e-09
0.704367	5.13497e-09		0.704367	6.24104e-09		0.704367	2.96634e-09		0.704367	3.78585e-09		0.704367	4.79436e-09		0.704367	5.94879e-09
0.70726	5.02583e-09		0.70726	6.12734e-09		0.70726	2.95528e-09		0.70726	3.76912e-09		0.70726	4.77054e-09		0.70726	5.91383e-09
0.710154	4.92336e-09		0.710154	6.02113e-09		0.710154	2.94435e-09		0.710154	3.7524e-09		0.710154	4.74668e-09		0.710154	5.87853e-09
0.713048	4.82805e-09		0.713048	5.92414e-09		0.713048	2.93359e-09		0.713048	3.73565e-09		0.713048	4.72301e-09		0.713048	5.84294e-09
0.715942	4.74088e-09		0.715942	5.83427e-09		0.715942	2.92307e-09		0.715942	3.71886e-09		0.715942	4.69989e-09		0.715942	5.80697e-09
0.715942	4.74088e-09		0.715942	5.83427e-09		0.715942	2.92307e-09		0.715942	3.71886e-09		0.715942	4.69989e-09		0.715942	5.80697e-09
0.718836	4.65959e-09		0.718836	5.74734e-09		0.718836	2.91269e-09		0.718836	3.70207e-09		0.718836	4.67708e-09		0.718836	5.77101e-09
0.72173	4.5809e-09		0.72173	5.66171e-09		0.72173	2.90229e-09		0.72173	3.68533e-09		0.72173	4.65427e-09		0.72173	5.73554e-09
0.724624	4.50458e-09		0.724624	5.57738e-09		0.724624	2.89187e-09		0.724624	3.66867e-09		0.724624	4.63141e-09		0.724624	5.70034e-09
0.727518	4.43045e-09		0.727518	5.49433e-09		0.727518	2.88143e-09		0.727518	3.65209e-09		0.727518	4.60848e-09		0.727518	5.66518e-09
0.730412	4.35825e-09		0.730412	5.41263e-09		0.730412	2.87096e-09		0.730412	3.63552e-09		0.730412	4.58543e-09		0.730412	5.62993e-09
0.733305	4.28769e-09		0.733305	5.33236e-09		0.733305	2.86043e-09		0.733305	3.6189e-09		0.733305	4.56224e-09		0.733305	5.59449e-09
0.736199	4.21849e-09		0.736199	5.25346e-09		0.736199	2.84984e-09		0.736199	3.60217e-09		0.736199	4.53884e-09		0.736199	5.55878e-09
0.739093	4.1504e-09		0.739093	5.17582e-09		0.739093	2.83918e-09		0.739093	3.58532e-09		0.739093	4.5152e-09		0.739093	5.52273e-09
0.741987	4.08319e-09		0.741987	5.09934e-09		0.741987	2.82841e-09		0.741987	3.56831e-09		0.741987	4.49125e-09		0.741987	5.48626e-09
0.744881	4.01657e-09		0.744881	5.02392e-09		0.744881	2.81753e-09		0.744881	3.55112e-09		0.744881	4.46696e-09		0.744881	5.44928e-09
0.747775	3.95097e-09		0.747775	4.94943e-09		0.747775	2.80649e-09		0.747775	3.5337e-09		0.747775	4.44224e-09		0.747775	5.41174e-09
0.750669	3.88692e-09		0.750669	4.87587e-09		0.750669	2.79528e-09		0.750669	3.51601e-09		0.750669	4.41703e-09		0.750669	5.37365e-09
0.753563	3.82422e-09		0.753563	4.80322e-09		0.753563	2.78384e-09		0.753563	3.49801e-09		0.753563	4.39125e-09		0.753563	5.33516e-09
0.756457	3.76261e-09		0.756457	4.73133e-09		0.756457	2.77216e-09		0.756457	3.47965e-09		0.756457	4.36483e-09		0.756457	5.29593e-09
0.75935	3.70187e-09		0.75935	4.66002e-09		0.75935	2.7602e-09		0.75935	3.46087e-09		0.75935	4.33766e-09		0.75935	5.25553e-09
0.762244	3.64177e-09		0.762244	4.58913e-09		0.762244	2.74794e-09		0.762244	3.44161e-09		0.762244	4.30966e-09		0.762244	5.21408e-09
0.765138	3.58212e-09		0.765138	4.51846e-09		0.765138	2.73532e-09		0.765138	3.42181e-09		0.765138	4.28075e-09		0.765138	5.17169e-09
0.768032	3.52303e-09		0.768032	4.44804e-09		0.768032	2.72228e-09		0.768032	3.40142e-09		0.768032	4.25083e-09		0.768032	5.12838e-09
0.770926	3.46471e-09		0.770926	4.37792e-09		0.770926	2.70874e-09		0.770926	3.38037e-09		0.770926	4.21981e-09		0.770926	5.08415e-09
0.77382	3.40712e-09		0.77382	4.30799e-09		0.77382	2.69465e-09		0.77382	3.35862e-09		0.77382	4.18763e-09		0.77382	5.03899e-09
0.776714	3.35023e-09		0.776714	4.23816e-09		0.776714	2.67993e-09		0.776714	3.33614e-09		0.776714	4.15421e-09		0.776714	4.99292e-09
0.779608	3.29407e-09		0.779608	4.16837e-09		0.779608	2.66451e-09		0.779608	3.31289e-09		0.779608	4.11948e-09		0.779608	4.946e-09
0.782502	3.23875e-09		0.782502	4.09861e-09		0.782502	2.64831e-09		0.782502	3.28886e-09		0.782502	4.08341e-09		0.782502	4.8983e-09
0.785396	3.18446e-09		0.785396	4.02894e-09		0.785396	2.63127e-09		0.785396	3.264e-09		0.785396	4.04598e-09		0.785396	4.84994e-09
0.788289	3.13153e-09		0.788289	3.95988e-09		0.788289	2.6133e-09		0.788289	3.23823e-09		0.788289	4.00716e-09		0.788289	4.8011e-09
0.791183	3.08064e-09		0.791183	3.89179e-09		0.791183	2.59433e-09		0.791183	3.21149e-09		0.791183	3.96694e-09		0.791183	4.75153e-09
0.794077	3.03232e-09		0.794077	3.82466e-09		0.794077	2.57425e-09		0.794077	3.18379e-09		0.794077	3.92534e-09		0.794077	4.70094e-09
0.796971	2.98679e-09		0.796971	3.75866e-09		0.796971	2.55301e-09		0.796971	3.15515e-09		0.796971	3.88236e-09		0.796971	4.64943e-09
0.799865	2.94416e-09		0.799865	3.69392e-09		0.799865	2.53054e-09		0.799865	3.12557e-09		0.799865	3.83806e-09		0.799865	4.59709e-09
0.799865	2.94416e-09		0.799865	3.69392e-09		0.799865	2.53054e-09		0.799865	3.12557e-09		0.799865	3.83806e-09		0.799865	4.59709e-09
0.802759	2.90253e-09		0.802759	3.62938e-09		0.802759	2.50723e-09		0.802759	3.09491e-09		0.802759	3.79262e-09		0.802759	4.54333e-09
0.805653	2.86012e-09		0.805653	3.56447e-09		0.805653	2.48353e-09		0.805653	3.06305e-09		0.805653	3.74619e-09		0.805653	4.48754e-09
0.808547	2.81727e-09		0.808547	3.49972e-09		0.808547	2.45942e-09		0.808547	3.02994e-09		0.808547	3.69881e-09		0.808547	4.42973e-09
0.811441	2.77429e-09		0.811441	3.43513e-09		0.811441	2.43485e-09		0.811441	2.99555e-09		0.811441	3.65047e-09		0.811441	4.36989e-09
0.814334	2.73128e-09		0.814334	3.37058e-09		0.814334	2.40956e-09		0.814334	2.95983e-09		0.814334	3.60117e-09		0.814334	4.30842e-09
0.817228	2.68836e-09		0.817228	3.30592e-09		0.817228	2.38336e-09		0.817228	2.9227e-09		0.817228	3.55087e-09		0.817228	4.24575e-09
0.820122	2.64562e-09		0.820122	3.24111e-09		0.820122	2.35626e-09		0.820122	2.88442e-09		0.820122	3.49955e-09		0.820122	4.18197e-09
0.823016	2.60299e-09		0.823016	3.17641e-09		0.823016	2.32828e-09		0.823016	2.84527e-09		0.823016	3.44717e-09		0.823016	4.11715e-09
0.82591	2.5604e-09		0.82591	3.11194e-09		0.82591	2.29948e-09		0.82591	2.80532e-09		0.82591	3.39405e-09		0.82591	4.05137e-09
0.828804	2.51791e-09		0.828804	3.04754e-09		0.828804	2.26992e-09		0.828804	2.7646e-09		0.828804	3.34054e-09		0.828804	3.98477e-09
0.831698	2.47554e-09		0.831698	2.98309e-09		0.831698	2.23969e-09		0.831698	2.72318e-09		0.831698	3.28674e-09		0.831698	3.9173e-09
0.834592	2.4332e-09		0.834592	2.91846e-09		0.834592	2.20891e-09		0.834592	2.68117e-09		0.834592	3.23284e-09		0.834592	3.84891e-09
0.837486	2.39079e-09		0.837486	2.85431e-09		0.837486	2.17772e-09		0.837486	2.63871e-09		0.837486	3.17915e-09		0.837486	3.77976e-09
0.840379	2.34835e-09		0.840379	2.7915e-09		0.840379	2.14623e-09		0.840379	2.59593e-09		0.840379	3.12619e-09		0.840379	3.71006e-09
0.843273	2.30591e-09		0.843273	2.73036e-09		0.843273	2.11419e-09		0.843273	2.55272e-09		0.843273	3.07324e-09		0.843273	3.64004e-09
0.846167	2.26376e-09		0.846167	2.67132e-09		0.846167	2.08146e-09		0.846167	2.50897e-09		0.846167	3.01937e-09		0.846167	3.56993e-09
0.849061	2.22227e-09		0.849061	2.61478e-09		0.849061	2.04825e-09		0.849061	2.4649e-09		0.849061	2.96489e-09		0.849061	3.49992e-09
0.851955	2.18152e-09		0.851955	2.56059e-09		0.851955	2.01486e-09		0.851955	2.42078e-09		0.851955	2.91025e-09		0.851955	3.43032e-09
0.854849	2.14159e-09		0.854849	2.50853e-09		0.854849	1.98157e-09		0.854849	2.37692e-09		0.854849	2.85591e-09		0.854849	3.36154e-09
0.857743	2.10258e-09		0.857743	2.45874e-09		0.857743	1.94878e-09		0.857743	2.33369e-09		0.857743	2.80235e-09		0.857743	3.29406e-09
0.860637	2.06468e-09		0.860637	2.41164e-09		0.860637	1.91665e-09		0.860637	2.29138e-09		0.860637	2.75006e-09		0.860637	3.22843e-09
0.863531	2.02815e-09		0.863531	2.36801e-09		0.863531	1.88539e-09		0.863531	2.2504e-09		0.863531	2.69965e-09		0.863531	3.16541e-09
0.866424	1.99359e-09		0.866424	2.32891e-09		0.866424	1.85559e-09		0.866424	2.21149e-09		0.866424	2.65204e-09		0.866424	3.10605e-09
0.869318	1.96237e-09		0.869318	2.29564e-09		0.869318	1.82814e-09		0.869318	2.17577e-09		0.869318	2.60853e-09		0.869318	3.05194e-09
0.872212	1.93614e-09		0.872212	2.26822e-09		0.872212	1.80438e-09		0.872212	2.14497e-09		0.872212	2.57117e-09		0.872212	3.00556e-09
0.875106	1.91695e-09		0.875106	2.24804e-09		0.875106	1.78647e-09		0.875106	2.12187e-09		0.875106	2.54328e-09		0.875106	2.97102e-09
0.878	1.90954e-09		0.878	2.23962e-09		0.878	1.77932e-09		0.878	2.11269e-09		0.878	2.5322e-09		0.878	2.95736e-09

## Sheet: no2 distribution
SN 0			SN 0.2			SN 0.4			SN 0.6			SN 0.8			SN 1
Axial distance	no2 mass fraction		Axial distance	no2 mass fraction		Axial distance	no2 mass fraction		Axial distance	no2 mass fraction		Axial distance	no2 mass fraction		Axial distance	no2 mass fraction
0.00115113	3.46729e-09		0.00115113	3.46789e-09		0.00115113	2.42658e-09		0.00115113	7.21467e-10		0.00115113	4.23077e-10		0.00115113	2.43371e-10
0.00404502	4.62317e-09		0.00404502	4.56473e-09		0.00404502	2.83101e-09		0.00404502	8.86644e-10		0.00404502	4.62287e-10		0.00404502	2.60899e-10
0.00693891	5.85706e-09		0.00693891	5.7633e-09		0.00693891	3.19009e-09		0.00693891	1.02808e-09		0.00693891	4.96886e-10		0.00693891	2.71406e-10
0.0098328	7.2291e-09		0.0098328	7.08429e-09		0.0098328	3.49604e-09		0.0098328	1.15032e-09		0.0098328	5.19428e-10		0.0098328	2.74751e-10
0.0127267	8.69083e-09		0.0127267	8.39841e-09		0.0127267	3.76447e-09		0.0127267	1.24772e-09		0.0127267	5.29956e-10		0.0127267	2.70544e-10
0.0156206	1.01677e-08		0.0156206	9.62375e-09		0.0156206	4.02475e-09		0.0156206	1.31591e-09		0.0156206	5.27703e-10		0.0156206	2.59379e-10
0.0185145	1.15707e-08		0.0185145	1.06942e-08		0.0185145	4.30289e-09		0.0185145	1.35549e-09		0.0185145	5.13138e-10		0.0185145	2.43129e-10
0.0214084	1.28208e-08		0.0214084	1.15546e-08		0.0214084	4.60957e-09		0.0214084	1.37335e-09		0.0214084	4.88743e-10		0.0214084	2.23388e-10
0.0243023	1.38612e-08		0.0243023	1.21785e-08		0.0243023	4.93525e-09		0.0243023	1.36682e-09		0.0243023	4.55793e-10		0.0243023	2.01839e-10
0.0271961	1.46597e-08		0.0271961	1.25741e-08		0.0271961	5.25586e-09		0.0271961	1.33891e-09		0.0271961	4.18508e-10		0.0271961	1.79975e-10
0.03009	1.52119e-08		0.03009	1.27753e-08		0.03009	5.54395e-09		0.03009	1.29548e-09		0.03009	3.81031e-10		0.03009	1.62178e-10
0.0329839	1.5545e-08		0.0329839	1.28262e-08		0.0329839	5.78827e-09		0.0329839	1.23283e-09		0.0329839	3.48192e-10		0.0329839	1.53127e-10
0.0358778	1.56936e-08		0.0358778	1.27782e-08		0.0358778	5.97964e-09		0.0358778	1.15559e-09		0.0358778	3.22862e-10		0.0358778	1.54841e-10
0.0387717	1.56933e-08		0.0387717	1.26838e-08		0.0387717	6.10467e-09		0.0387717	1.0707e-09		0.0387717	3.09991e-10		0.0387717	1.68053e-10
0.0416656	1.55927e-08		0.0416656	1.25877e-08		0.0416656	6.16783e-09		0.0416656	9.85471e-10		0.0416656	3.1533e-10		0.0416656	1.9504e-10
0.0445595	1.54365e-08		0.0445595	1.25259e-08		0.0445595	6.17857e-09		0.0445595	9.0914e-10		0.0445595	3.45625e-10		0.0445595	2.39394e-10
0.0474534	1.5265e-08		0.0474534	1.25233e-08		0.0474534	6.14418e-09		0.0474534	8.61594e-10		0.0474534	4.16506e-10		0.0474534	3.05269e-10
0.0503473	1.511e-08		0.0503473	1.25951e-08		0.0503473	6.07395e-09		0.0503473	8.67787e-10		0.0503473	5.55525e-10		0.0503473	3.96332e-10
0.0532412	1.49943e-08		0.0532412	1.27488e-08		0.0532412	5.99015e-09		0.0532412	9.89736e-10		0.0532412	8.20398e-10		0.0532412	5.15817e-10
0.056135	1.49368e-08		0.056135	1.2985e-08		0.056135	5.89322e-09		0.056135	1.43095e-09		0.056135	1.36255e-09		0.056135	6.70791e-10
0.0590289	1.49494e-08		0.0590289	1.32979e-08		0.0590289	5.76983e-09		0.0590289	2.7413e-09		0.0590289	2.55343e-09		0.0590289	8.82136e-10
0.0619228	1.50382e-08		0.0619228	1.36776e-08		0.0619228	5.62743e-09		0.0619228	6.13892e-09		0.0619228	5.21419e-09		0.0619228	1.2041e-09
0.0648167	1.52066e-08		0.0648167	1.41103e-08		0.0648167	5.47362e-09		0.0648167	1.37989e-08		0.0648167	1.15079e-08		0.0648167	1.7722e-09
0.0677106	1.54558e-08		0.0677106	1.45788e-08		0.0677106	5.32248e-09		0.0677106	2.94756e-08		0.0677106	2.5411e-08		0.0677106	2.93203e-09
0.0706045	1.57823e-08		0.0706045	1.50644e-08		0.0706045	5.17042e-09		0.0706045	6.09638e-08		0.0706045	5.3089e-08		0.0706045	5.45059e-09
0.0734984	1.61775e-08		0.0734984	1.55478e-08		0.0734984	5.00402e-09		0.0734984	1.23093e-07		0.0734984	1.02149e-07		0.0734984	1.10013e-08
0.0763923	1.66321e-08		0.0763923	1.60121e-08		0.0763923	4.82778e-09		0.0763923	2.39353e-07		0.0763923	1.83146e-07		0.0763923	2.26831e-08
0.0792862	1.71354e-08		0.0792862	1.64448e-08		0.0792862	4.65111e-09		0.0792862	4.3928e-07		0.0792862	3.22841e-07		0.0792862	4.56216e-08
0.0821801	1.76758e-08		0.0821801	1.68379e-08		0.0821801	4.4742e-09		0.0821801	7.44683e-07		0.0821801	5.53902e-07		0.0821801	8.68182e-08
0.085074	1.82412e-08		0.085074	1.71868e-08		0.085074	4.29898e-09		0.085074	1.14774e-06		0.085074	8.89983e-07		0.085074	1.53033e-07
0.085074	1.82412e-08		0.085074	1.71868e-08		0.085074	4.29898e-09		0.085074	1.14774e-06		0.085074	8.89983e-07		0.085074	1.53033e-07
0.0879678	1.88214e-08		0.0879678	1.749e-08		0.0879678	4.1404e-09		0.0879678	1.60486e-06		0.0879678	1.31362e-06		0.0879678	2.62059e-07
0.0908617	1.94048e-08		0.0908617	1.77498e-08		0.0908617	4.0495e-09		0.0908617	2.0604e-06		0.0908617	1.77624e-06		0.0908617	4.38836e-07
0.0937556	1.99795e-08		0.0937556	1.79754e-08		0.0937556	4.16677e-09		0.0937556	2.42342e-06		0.0937556	2.21615e-06		0.0937556	6.99399e-07
0.0966495	2.05352e-08		0.0966495	1.81684e-08		0.0966495	4.94634e-09		0.0966495	2.63755e-06		0.0966495	2.54683e-06		0.0966495	1.04546e-06
0.0995434	2.10617e-08		0.0995434	1.83327e-08		0.0995434	7.56966e-09		0.0995434	2.74262e-06		0.0995434	2.73462e-06		0.0995434	1.45567e-06
0.102437	2.15529e-08		0.102437	1.84814e-08		0.102437	1.44767e-08		0.102437	2.7881e-06		0.102437	2.82812e-06		0.102437	1.88945e-06
0.105331	2.20054e-08		0.105331	1.86226e-08		0.105331	2.94014e-08		0.105331	2.80025e-06		0.105331	2.87008e-06		0.105331	2.29336e-06
0.108225	2.24174e-08		0.108225	1.87662e-08		0.108225	5.85579e-08		0.108225	2.79282e-06		0.108225	2.88456e-06		0.108225	2.59919e-06
0.111119	2.27936e-08		0.111119	1.89154e-08		0.111119	1.11962e-07		0.111119	2.77465e-06		0.111119	2.88515e-06		0.111119	2.78548e-06
0.114013	2.31261e-08		0.114013	1.90738e-08		0.114013	2.02575e-07		0.114013	2.75165e-06		0.114013	2.87845e-06		0.114013	2.88945e-06
0.116907	2.34132e-08		0.116907	1.92493e-08		0.116907	3.42445e-07		0.116907	2.7272e-06		0.116907	2.86766e-06		0.116907	2.94454e-06
0.119801	2.36579e-08		0.119801	1.94479e-08		0.119801	5.40793e-07		0.119801	2.70248e-06		0.119801	2.85528e-06		0.119801	2.97194e-06
0.122695	2.38591e-08		0.122695	1.96683e-08		0.122695	8.00061e-07		0.122695	2.67847e-06		0.122695	2.84345e-06		0.122695	2.98435e-06
0.125588	2.40253e-08		0.125588	1.99083e-08		0.125588	1.11145e-06		0.125588	2.65608e-06		0.125588	2.83324e-06		0.125588	2.98817e-06
0.128482	2.41608e-08		0.128482	2.01714e-08		0.128482	1.45834e-06		0.128482	2.63612e-06		0.128482	2.82443e-06		0.128482	2.98752e-06
0.131376	2.4271e-08		0.131376	2.04582e-08		0.131376	1.82107e-06		0.131376	2.61905e-06		0.131376	2.81676e-06		0.131376	2.98499e-06
0.13427	2.43614e-08		0.13427	2.07718e-08		0.13427	2.16287e-06		0.13427	2.60458e-06		0.13427	2.81011e-06		0.13427	2.98113e-06
0.137164	2.44368e-08		0.137164	2.11032e-08		0.137164	2.43228e-06		0.137164	2.59234e-06		0.137164	2.80433e-06		0.137164	2.97638e-06
0.140058	2.45025e-08		0.140058	2.14452e-08		0.140058	2.60787e-06		0.140058	2.58201e-06		0.140058	2.79925e-06		0.140058	2.97154e-06
0.142952	2.45635e-08		0.142952	2.18067e-08		0.142952	2.70363e-06		0.142952	2.57327e-06		0.142952	2.79472e-06		0.142952	2.96723e-06
0.145846	2.46243e-08		0.145846	2.21786e-08		0.145846	2.74317e-06		0.145846	2.56599e-06		0.145846	2.7906e-06		0.145846	2.96338e-06
0.14874	2.46901e-08		0.14874	2.25563e-08		0.14874	2.74794e-06		0.14874	2.56001e-06		0.14874	2.78681e-06		0.14874	2.95997e-06
0.151633	2.47633e-08		0.151633	2.29365e-08		0.151633	2.72939e-06		0.151633	2.55505e-06		0.151633	2.78325e-06		0.151633	2.95695e-06
0.154527	2.48467e-08		0.154527	2.33168e-08		0.154527	2.69451e-06		0.154527	2.5509e-06		0.154527	2.77989e-06		0.154527	2.95426e-06
0.157421	2.49442e-08		0.157421	2.36945e-08		0.157421	2.65098e-06		0.157421	2.54738e-06		0.157421	2.7767e-06		0.157421	2.95184e-06
0.160315	2.50585e-08		0.160315	2.40668e-08		0.160315	2.60465e-06		0.160315	2.54433e-06		0.160315	2.77365e-06		0.160315	2.94964e-06
0.163209	2.51938e-08		0.163209	2.4432e-08		0.163209	2.55906e-06		0.163209	2.54163e-06		0.163209	2.7707e-06		0.163209	2.94759e-06
0.166103	2.53496e-08		0.166103	2.47839e-08		0.166103	2.51516e-06		0.166103	2.53923e-06		0.166103	2.76783e-06		0.166103	2.94564e-06
0.166103	2.53496e-08		0.166103	2.47839e-08		0.166103	2.51516e-06		0.166103	2.53923e-06		0.166103	2.76783e-06		0.166103	2.94564e-06
0.168997	2.55253e-08		0.168997	2.51362e-08		0.168997	2.4738e-06		0.168997	2.53703e-06		0.168997	2.76505e-06		0.168997	2.94361e-06
0.171891	2.5724e-08		0.171891	2.54897e-08		0.171891	2.43562e-06		0.171891	2.53494e-06		0.171891	2.76236e-06		0.171891	2.94137e-06
0.174785	2.59554e-08		0.174785	2.58361e-08		0.174785	2.40124e-06		0.174785	2.53294e-06		0.174785	2.75974e-06		0.174785	2.93893e-06
0.177678	2.62164e-08		0.177678	2.61758e-08		0.177678	2.37144e-06		0.177678	2.53097e-06		0.177678	2.75718e-06		0.177678	2.9363e-06
0.180572	2.64975e-08		0.180572	2.65157e-08		0.180572	2.34578e-06		0.180572	2.52904e-06		0.180572	2.75465e-06		0.180572	2.93351e-06
0.183466	2.68014e-08		0.183466	2.68551e-08		0.183466	2.32396e-06		0.183466	2.52712e-06		0.183466	2.75215e-06		0.183466	2.93055e-06
0.18636	2.71291e-08		0.18636	2.71979e-08		0.18636	2.30563e-06		0.18636	2.5252e-06		0.18636	2.74967e-06		0.18636	2.92744e-06
0.189254	2.74814e-08		0.189254	2.75477e-08		0.189254	2.29061e-06		0.189254	2.52327e-06		0.189254	2.74721e-06		0.189254	2.92418e-06
0.192148	2.7862e-08		0.192148	2.79044e-08		0.192148	2.27889e-06		0.192148	2.52134e-06		0.192148	2.74477e-06		0.192148	2.92083e-06
0.195042	2.82668e-08		0.195042	2.82835e-08		0.195042	2.27022e-06		0.195042	2.5194e-06		0.195042	2.74233e-06		0.195042	2.91741e-06
0.197936	2.86964e-08		0.197936	2.86924e-08		0.197936	2.26418e-06		0.197936	2.51744e-06		0.197936	2.7399e-06		0.197936	2.91395e-06
0.20083	2.91506e-08		0.20083	2.91202e-08		0.20083	2.2604e-06		0.20083	2.51548e-06		0.20083	2.73748e-06		0.20083	2.91045e-06
0.203723	2.96269e-08		0.203723	2.95649e-08		0.203723	2.25854e-06		0.203723	2.51351e-06		0.203723	2.73507e-06		0.203723	2.9069e-06
0.206617	3.01357e-08		0.206617	3.00379e-08		0.206617	2.25824e-06		0.206617	2.51153e-06		0.206617	2.73267e-06		0.206617	2.90333e-06
0.209511	3.06724e-08		0.209511	3.05496e-08		0.209511	2.25926e-06		0.209511	2.50955e-06		0.209511	2.73028e-06		0.209511	2.89973e-06
0.212405	3.12377e-08		0.212405	3.10965e-08		0.212405	2.26158e-06		0.212405	2.50757e-06		0.212405	2.7279e-06		0.212405	2.89612e-06
0.215299	3.18301e-08		0.215299	3.16774e-08		0.215299	2.26534e-06		0.215299	2.5056e-06		0.215299	2.72556e-06		0.215299	2.8925e-06
0.215299	3.18301e-08		0.215299	3.16774e-08		0.215299	2.26534e-06		0.215299	2.5056e-06		0.215299	2.72556e-06		0.215299	2.8925e-06
0.218193	3.24533e-08		0.218193	3.23082e-08		0.218193	2.26989e-06		0.218193	2.50361e-06		0.218193	2.72319e-06		0.218193	2.88885e-06
0.221087	3.31265e-08		0.221087	3.29984e-08		0.221087	2.27416e-06		0.221087	2.50152e-06		0.221087	2.7207e-06		0.221087	2.88512e-06
0.223981	3.38393e-08		0.223981	3.37567e-08		0.223981	2.2777e-06		0.223981	2.49932e-06		0.223981	2.71805e-06		0.223981	2.88129e-06
0.226875	3.45865e-08		0.226875	3.45999e-08		0.226875	2.28032e-06		0.226875	2.497e-06		0.226875	2.71522e-06		0.226875	2.87736e-06
0.229768	3.53856e-08		0.229768	3.55213e-08		0.229768	2.28206e-06		0.229768	2.49458e-06		0.229768	2.71222e-06		0.229768	2.87333e-06
0.232662	3.62284e-08		0.232662	3.65148e-08		0.232662	2.28305e-06		0.232662	2.49206e-06		0.232662	2.70909e-06		0.232662	2.86919e-06
0.235556	3.71048e-08		0.235556	3.75941e-08		0.235556	2.2834e-06		0.235556	2.48945e-06		0.235556	2.70587e-06		0.235556	2.86496e-06
0.23845	3.80257e-08		0.23845	3.87646e-08		0.23845	2.28323e-06		0.23845	2.48676e-06		0.23845	2.70257e-06		0.23845	2.86064e-06
0.241344	3.89961e-08		0.241344	4.00287e-08		0.241344	2.28263e-06		0.241344	2.484e-06		0.241344	2.69918e-06		0.241344	2.85622e-06
0.244238	4.00164e-08		0.244238	4.13885e-08		0.244238	2.28169e-06		0.244238	2.48117e-06		0.244238	2.69573e-06		0.244238	2.85172e-06
0.247132	4.10859e-08		0.247132	4.28491e-08		0.247132	2.28047e-06		0.247132	2.47828e-06		0.247132	2.69222e-06		0.247132	2.84716e-06
0.250026	4.22067e-08		0.250026	4.44139e-08		0.250026	2.27902e-06		0.250026	2.47533e-06		0.250026	2.68865e-06		0.250026	2.84258e-06
0.25292	4.33882e-08		0.25292	4.60786e-08		0.25292	2.27739e-06		0.25292	2.47234e-06		0.25292	2.68504e-06		0.25292	2.83797e-06
0.255814	4.46339e-08		0.255814	4.78403e-08		0.255814	2.27561e-06		0.255814	2.46934e-06		0.255814	2.68137e-06		0.255814	2.83332e-06
0.258707	4.59398e-08		0.258707	4.97068e-08		0.258707	2.2737e-06		0.258707	2.46633e-06		0.258707	2.67766e-06		0.258707	2.82865e-06
0.261601	4.73102e-08		0.261601	5.16887e-08		0.261601	2.27169e-06		0.261601	2.46331e-06		0.261601	2.67392e-06		0.261601	2.82394e-06
0.264495	4.87558e-08		0.264495	5.38e-08		0.264495	2.26961e-06		0.264495	2.46028e-06		0.264495	2.67013e-06		0.264495	2.81921e-06
0.267389	5.02862e-08		0.267389	5.60565e-08		0.267389	2.26745e-06		0.267389	2.45725e-06		0.267389	2.66631e-06		0.267389	2.81444e-06
0.270283	5.19012e-08		0.270283	5.84748e-08		0.270283	2.26525e-06		0.270283	2.45421e-06		0.270283	2.66246e-06		0.270283	2.80964e-06
0.273177	5.35973e-08		0.273177	6.10675e-08		0.273177	2.26299e-06		0.273177	2.45116e-06		0.273177	2.65857e-06		0.273177	2.80481e-06
0.276071	5.53808e-08		0.276071	6.38452e-08		0.276071	2.26071e-06		0.276071	2.4481e-06		0.276071	2.65466e-06		0.276071	2.79995e-06
0.278965	5.72604e-08		0.278965	6.68201e-08		0.278965	2.25839e-06		0.278965	2.44505e-06		0.278965	2.65071e-06		0.278965	2.79506e-06
0.281859	5.92452e-08		0.281859	7.00117e-08		0.281859	2.25605e-06		0.281859	2.44198e-06		0.281859	2.64673e-06		0.281859	2.79013e-06
0.284752	6.1345e-08		0.284752	7.34406e-08		0.284752	2.25369e-06		0.284752	2.43892e-06		0.284752	2.64271e-06		0.284752	2.78516e-06
0.287646	6.35698e-08		0.287646	7.71131e-08		0.287646	2.2513e-06		0.287646	2.43585e-06		0.287646	2.63866e-06		0.287646	2.78014e-06
0.29054	6.59301e-08		0.29054	8.10311e-08		0.29054	2.2489e-06		0.29054	2.43277e-06		0.29054	2.63457e-06		0.29054	2.77512e-06
0.293434	6.84363e-08		0.293434	8.52058e-08		0.293434	2.24649e-06		0.293434	2.42969e-06		0.293434	2.63049e-06		0.293434	2.77009e-06
0.296328	7.11039e-08		0.296328	8.96536e-08		0.296328	2.24405e-06		0.296328	2.42661e-06		0.296328	2.62639e-06		0.296328	2.76506e-06
0.299222	7.39458e-08		0.299222	9.44042e-08		0.299222	2.2416e-06		0.299222	2.42353e-06		0.299222	2.6223e-06		0.299222	2.76003e-06
0.302116	7.69702e-08		0.302116	9.94786e-08		0.302116	2.23913e-06		0.302116	2.42044e-06		0.302116	2.61819e-06		0.302116	2.755e-06
0.30501	8.01908e-08		0.30501	1.04884e-07		0.30501	2.23667e-06		0.30501	2.41735e-06		0.30501	2.61408e-06		0.30501	2.74997e-06
0.307904	8.36238e-08		0.307904	1.10636e-07		0.307904	2.23421e-06		0.307904	2.41424e-06		0.307904	2.60996e-06		0.307904	2.74494e-06
0.310797	8.72866e-08		0.310797	1.16753e-07		0.310797	2.23176e-06		0.310797	2.41114e-06		0.310797	2.60583e-06		0.310797	2.7399e-06
0.313691	9.12076e-08		0.313691	1.23265e-07		0.313691	2.22931e-06		0.313691	2.40802e-06		0.313691	2.60169e-06		0.313691	2.73486e-06
0.313691	9.12076e-08		0.313691	1.23265e-07		0.313691	2.22931e-06		0.313691	2.40802e-06		0.313691	2.60169e-06		0.313691	2.73486e-06
0.316585	9.54106e-08		0.316585	1.30194e-07		0.316585	2.22685e-06		0.316585	2.40485e-06		0.316585	2.59752e-06		0.316585	2.72975e-06
0.319479	9.99184e-08		0.319479	1.37556e-07		0.319479	2.22434e-06		0.319479	2.4016e-06		0.319479	2.5933e-06		0.319479	2.72455e-06
0.322373	1.04765e-07		0.322373	1.45378e-07		0.322373	2.22182e-06		0.322373	2.39827e-06		0.322373	2.58905e-06		0.322373	2.71926e-06
0.325267	1.0998e-07		0.325267	1.53671e-07		0.325267	2.21927e-06		0.325267	2.39489e-06		0.325267	2.58475e-06		0.325267	2.71387e-06
0.328161	1.15588e-07		0.328161	1.62468e-07		0.328161	2.21671e-06		0.328161	2.3915e-06		0.328161	2.58041e-06		0.328161	2.7084e-06
0.331055	1.21613e-07		0.331055	1.71781e-07		0.331055	2.21415e-06		0.331055	2.3881e-06		0.331055	2.57603e-06		0.331055	2.70287e-06
0.333949	1.28087e-07		0.333949	1.8161e-07		0.333949	2.21159e-06		0.333949	2.38468e-06		0.333949	2.57161e-06		0.333949	2.6973e-06
0.336842	1.35056e-07		0.336842	1.9197e-07		0.336842	2.20904e-06		0.336842	2.38124e-06		0.336842	2.56714e-06		0.336842	2.6917e-06
0.339736	1.42558e-07		0.339736	2.02908e-07		0.339736	2.20649e-06		0.339736	2.3778e-06		0.339736	2.56263e-06		0.339736	2.68606e-06
0.34263	1.5063e-07		0.34263	2.14451e-07		0.34263	2.20394e-06		0.34263	2.37435e-06		0.34263	2.55808e-06		0.34263	2.68039e-06
0.345524	1.59315e-07		0.345524	2.26623e-07		0.345524	2.20141e-06		0.345524	2.37089e-06		0.345524	2.55353e-06		0.345524	2.6747e-06
0.348418	1.68676e-07		0.348418	2.39468e-07		0.348418	2.19889e-06		0.348418	2.36742e-06		0.348418	2.54897e-06		0.348418	2.66897e-06
0.351312	1.78763e-07		0.351312	2.53002e-07		0.351312	2.19638e-06		0.351312	2.36394e-06		0.351312	2.54439e-06		0.351312	2.66322e-06
0.354206	1.89613e-07		0.354206	2.67262e-07		0.354206	2.19388e-06		0.354206	2.36045e-06		0.354206	2.53981e-06		0.354206	2.65745e-06
0.3571	2.01288e-07		0.3571	2.82315e-07		0.3571	2.19139e-06		0.3571	2.35695e-06		0.3571	2.53522e-06		0.3571	2.65165e-06
0.359994	2.13848e-07		0.359994	2.98221e-07		0.359994	2.18892e-06		0.359994	2.35344e-06		0.359994	2.53061e-06		0.359994	2.64582e-06
0.362887	2.27358e-07		0.362887	3.15053e-07		0.362887	2.18645e-06		0.362887	2.34992e-06		0.362887	2.526e-06		0.362887	2.63997e-06
0.365781	2.41875e-07		0.365781	3.32897e-07		0.365781	2.184e-06		0.365781	2.34638e-06		0.365781	2.52137e-06		0.365781	2.63409e-06
0.368675	2.57439e-07		0.368675	3.5185e-07		0.368675	2.18154e-06		0.368675	2.34283e-06		0.368675	2.51673e-06		0.368675	2.6282e-06
0.371569	2.74095e-07		0.371569	3.72054e-07		0.371569	2.17909e-06		0.371569	2.33926e-06		0.371569	2.51208e-06		0.371569	2.62232e-06
0.374463	2.91893e-07		0.374463	3.93637e-07		0.374463	2.17663e-06		0.374463	2.33566e-06		0.374463	2.50741e-06		0.374463	2.61646e-06
0.377357	3.10891e-07		0.377357	4.16647e-07		0.377357	2.17416e-06		0.377357	2.33204e-06		0.377357	2.50273e-06		0.377357	2.6106e-06
0.380251	3.31161e-07		0.380251	4.41086e-07		0.380251	2.17167e-06		0.380251	2.32838e-06		0.380251	2.49804e-06		0.380251	2.60475e-06
0.383145	3.52773e-07		0.383145	4.66974e-07		0.383145	2.16915e-06		0.383145	2.32467e-06		0.383145	2.49332e-06		0.383145	2.59892e-06
0.386039	3.75804e-07		0.386039	4.94393e-07		0.386039	2.16662e-06		0.386039	2.32092e-06		0.386039	2.48857e-06		0.386039	2.59309e-06
0.388932	4.00338e-07		0.388932	5.23458e-07		0.388932	2.16411e-06		0.388932	2.31721e-06		0.388932	2.4838e-06		0.388932	2.58728e-06
0.391826	4.26478e-07		0.391826	5.54305e-07		0.391826	2.16162e-06		0.391826	2.31357e-06		0.391826	2.47903e-06		0.391826	2.58147e-06
0.39472	4.54339e-07		0.39472	5.87067e-07		0.39472	2.15912e-06		0.39472	2.31e-06		0.39472	2.47427e-06		0.39472	2.57567e-06
0.397614	4.84036e-07		0.397614	6.2188e-07		0.397614	2.15662e-06		0.397614	2.30651e-06		0.397614	2.46953e-06		0.397614	2.56986e-06
0.400508	5.15671e-07		0.400508	6.58902e-07		0.400508	2.15411e-06		0.400508	2.30308e-06		0.400508	2.46479e-06		0.400508	2.56406e-06
0.403402	5.49342e-07		0.403402	6.98336e-07		0.403402	2.15158e-06		0.403402	2.29972e-06		0.403402	2.46005e-06		0.403402	2.55826e-06
0.403402	5.49342e-07		0.403402	6.98336e-07		0.403402	2.15158e-06		0.403402	2.29972e-06		0.403402	2.46005e-06		0.403402	2.55826e-06
0.406296	5.85099e-07		0.406296	7.40483e-07		0.406296	2.149e-06		0.406296	2.29638e-06		0.406296	2.4553e-06		0.406296	2.55245e-06
0.40919	6.22959e-07		0.40919	7.85635e-07		0.40919	2.14636e-06		0.40919	2.293e-06		0.40919	2.45052e-06		0.40919	2.54662e-06
0.412084	6.62971e-07		0.412084	8.34188e-07		0.412084	2.14365e-06		0.412084	2.28959e-06		0.412084	2.4457e-06		0.412084	2.54077e-06
0.414977	7.05236e-07		0.414977	8.86778e-07		0.414977	2.14088e-06		0.414977	2.28613e-06		0.414977	2.44084e-06		0.414977	2.53488e-06
0.417871	7.4993e-07		0.417871	9.44026e-07		0.417871	2.13806e-06		0.417871	2.28264e-06		0.417871	2.43595e-06		0.417871	2.52897e-06
0.420765	7.97274e-07		0.420765	1.00688e-06		0.420765	2.13517e-06		0.420765	2.2791e-06		0.420765	2.43104e-06		0.420765	2.52303e-06
0.423659	8.47532e-07		0.423659	1.07653e-06		0.423659	2.13224e-06		0.423659	2.27551e-06		0.423659	2.42609e-06		0.423659	2.51707e-06
0.426553	9.00914e-07		0.426553	1.15526e-06		0.426553	2.12926e-06		0.426553	2.27189e-06		0.426553	2.42111e-06		0.426553	2.51109e-06
0.429447	9.57637e-07		0.429447	1.24701e-06		0.429447	2.12624e-06		0.429447	2.26824e-06		0.429447	2.41612e-06		0.429447	2.5051e-06
0.432341	1.01817e-06		0.432341	1.35548e-06		0.432341	2.1232e-06		0.432341	2.26456e-06		0.432341	2.4111e-06		0.432341	2.49912e-06
0.435235	1.08331e-06		0.435235	1.48027e-06		0.435235	2.12014e-06		0.435235	2.26085e-06		0.435235	2.40607e-06		0.435235	2.49313e-06
0.438129	1.15388e-06		0.438129	1.61741e-06		0.438129	2.11706e-06		0.438129	2.25714e-06		0.438129	2.40101e-06		0.438129	2.48716e-06
0.441023	1.23121e-06		0.441023	1.76515e-06		0.441023	2.11398e-06		0.441023	2.25341e-06		0.441023	2.39593e-06		0.441023	2.48118e-06
0.443916	1.31801e-06		0.443916	1.91856e-06		0.443916	2.11091e-06		0.443916	2.24968e-06		0.443916	2.39084e-06		0.443916	2.47518e-06
0.44681	1.41932e-06		0.44681	2.07395e-06		0.44681	2.10784e-06		0.44681	2.24594e-06		0.44681	2.38573e-06		0.44681	2.46917e-06
0.449704	1.53844e-06		0.449704	2.23265e-06		0.449704	2.10479e-06		0.449704	2.24216e-06		0.449704	2.38061e-06		0.449704	2.46315e-06
0.452598	1.66992e-06		0.452598	2.39099e-06		0.452598	2.10176e-06		0.452598	2.23836e-06		0.452598	2.37548e-06		0.452598	2.45713e-06
0.455492	1.81006e-06		0.455492	2.54626e-06		0.455492	2.09876e-06		0.455492	2.23454e-06		0.455492	2.37035e-06		0.455492	2.45111e-06
0.458386	1.95889e-06		0.458386	2.69769e-06		0.458386	2.0958e-06		0.458386	2.23069e-06		0.458386	2.36521e-06		0.458386	2.44509e-06
0.46128	2.1101e-06		0.46128	2.84371e-06		0.46128	2.09285e-06		0.46128	2.22683e-06		0.46128	2.36006e-06		0.46128	2.43909e-06
0.464174	2.26098e-06		0.464174	2.98551e-06		0.464174	2.08992e-06		0.464174	2.22295e-06		0.464174	2.35491e-06		0.464174	2.43309e-06
0.467068	2.40998e-06		0.467068	3.11765e-06		0.467068	2.08698e-06		0.467068	2.21906e-06		0.467068	2.34977e-06		0.467068	2.42711e-06
0.469961	2.55419e-06		0.469961	3.23303e-06		0.469961	2.08405e-06		0.469961	2.21515e-06		0.469961	2.34462e-06		0.469961	2.42115e-06
0.472855	2.69304e-06		0.472855	3.33615e-06		0.472855	2.08112e-06		0.472855	2.21123e-06		0.472855	2.33948e-06		0.472855	2.41522e-06
0.475749	2.82453e-06		0.475749	3.43018e-06		0.475749	2.07819e-06		0.475749	2.2073e-06		0.475749	2.33434e-06		0.475749	2.4093e-06
0.478643	2.94826e-06		0.478643	3.51495e-06		0.478643	2.07526e-06		0.478643	2.20335e-06		0.478643	2.32921e-06		0.478643	2.4034e-06
0.481537	3.06409e-06		0.481537	3.59182e-06		0.481537	2.07234e-06		0.481537	2.1994e-06		0.481537	2.3241e-06		0.481537	2.3975e-06
0.484431	3.17076e-06		0.484431	3.66086e-06		0.484431	2.06943e-06		0.484431	2.19545e-06		0.484431	2.319e-06		0.484431	2.39163e-06
0.487325	3.26798e-06		0.487325	3.72248e-06		0.487325	2.06652e-06		0.487325	2.19148e-06		0.487325	2.31393e-06		0.487325	2.38576e-06
0.490219	3.35614e-06		0.490219	3.77654e-06		0.490219	2.06361e-06		0.490219	2.1875e-06		0.490219	2.30888e-06		0.490219	2.37992e-06
0.493113	3.43513e-06		0.493113	3.82306e-06		0.493113	2.0607e-06		0.493113	2.18352e-06		0.493113	2.30385e-06		0.493113	2.37409e-06
0.496006	3.50531e-06		0.496006	3.86245e-06		0.496006	2.0578e-06		0.496006	2.17953e-06		0.496006	2.29885e-06		0.496006	2.36828e-06
0.4989	3.56687e-06		0.4989	3.89446e-06		0.4989	2.05491e-06		0.4989	2.17553e-06		0.4989	2.29387e-06		0.4989	2.36249e-06
0.501794	3.62041e-06		0.501794	3.91979e-06		0.501794	2.05201e-06		0.501794	2.17153e-06		0.501794	2.28891e-06		0.501794	2.35671e-06
0.504688	3.6668e-06		0.504688	3.94031e-06		0.504688	2.04912e-06		0.504688	2.16754e-06		0.504688	2.28399e-06		0.504688	2.35095e-06
0.507582	3.70504e-06		0.507582	3.95609e-06		0.507582	2.04623e-06		0.507582	2.16356e-06		0.507582	2.27909e-06		0.507582	2.34521e-06
0.510476	3.73492e-06		0.510476	3.96515e-06		0.510476	2.04334e-06		0.510476	2.15958e-06		0.510476	2.27422e-06		0.510476	2.33949e-06
0.51337	3.7584e-06		0.51337	3.96802e-06		0.51337	2.04045e-06		0.51337	2.15562e-06		0.51337	2.26938e-06		0.51337	2.33379e-06
0.516264	3.77578e-06		0.516264	3.96681e-06		0.516264	2.03755e-06		0.516264	2.15167e-06		0.516264	2.26456e-06		0.516264	2.32811e-06
0.519158	3.78751e-06		0.519158	3.96225e-06		0.519158	2.03465e-06		0.519158	2.14773e-06		0.519158	2.25976e-06		0.519158	2.32246e-06
0.522051	3.79386e-06		0.522051	3.95467e-06		0.522051	2.03174e-06		0.522051	2.1438e-06		0.522051	2.25502e-06		0.522051	2.31682e-06
0.524945	3.79404e-06		0.524945	3.94339e-06		0.524945	2.02882e-06		0.524945	2.13989e-06		0.524945	2.25035e-06		0.524945	2.3112e-06
0.524945	3.79404e-06		0.524945	3.94339e-06		0.524945	2.02882e-06		0.524945	2.13989e-06		0.524945	2.25035e-06		0.524945	2.3112e-06
0.527839	3.78981e-06		0.527839	3.92863e-06		0.527839	2.0259e-06		0.527839	2.13598e-06		0.527839	2.24572e-06		0.527839	2.3056e-06
0.530733	3.78206e-06		0.530733	3.91128e-06		0.530733	2.02299e-06		0.530733	2.13209e-06		0.530733	2.24109e-06		0.530733	2.30002e-06
0.533627	3.77021e-06		0.533627	3.89135e-06		0.533627	2.0201e-06		0.533627	2.12821e-06		0.533627	2.23646e-06		0.533627	2.29447e-06
0.536521	3.75446e-06		0.536521	3.86904e-06		0.536521	2.01722e-06		0.536521	2.12433e-06		0.536521	2.23184e-06		0.536521	2.28895e-06
0.539415	3.73582e-06		0.539415	3.84474e-06		0.539415	2.01434e-06		0.539415	2.12047e-06		0.539415	2.22721e-06		0.539415	2.28345e-06
0.542309	3.71497e-06		0.542309	3.8187e-06		0.542309	2.01145e-06		0.542309	2.11661e-06		0.542309	2.22257e-06		0.542309	2.27797e-06
0.545203	3.69152e-06		0.545203	3.79141e-06		0.545203	2.00856e-06		0.545203	2.11276e-06		0.545203	2.21793e-06		0.545203	2.27252e-06
0.548096	3.6659e-06		0.548096	3.76303e-06		0.548096	2.00566e-06		0.548096	2.10893e-06		0.548096	2.21328e-06		0.548096	2.26709e-06
0.55099	3.63834e-06		0.55099	3.73344e-06		0.55099	2.00277e-06		0.55099	2.1051e-06		0.55099	2.20861e-06		0.55099	2.26168e-06
0.553884	3.60848e-06		0.553884	3.70299e-06		0.553884	1.99986e-06		0.553884	2.10129e-06		0.553884	2.20391e-06		0.553884	2.25629e-06
0.556778	3.57744e-06		0.556778	3.67228e-06		0.556778	1.99696e-06		0.556778	2.09748e-06		0.556778	2.1992e-06		0.556778	2.25092e-06
0.559672	3.54615e-06		0.559672	3.64127e-06		0.559672	1.99407e-06		0.559672	2.09368e-06		0.559672	2.19444e-06		0.559672	2.24558e-06
0.562566	3.51418e-06		0.562566	3.60981e-06		0.562566	1.99118e-06		0.562566	2.08987e-06		0.562566	2.18965e-06		0.562566	2.24025e-06
0.56546	3.48085e-06		0.56546	3.57797e-06		0.56546	1.9883e-06		0.56546	2.08607e-06		0.56546	2.18484e-06		0.56546	2.23494e-06
0.568354	3.44697e-06		0.568354	3.54621e-06		0.568354	1.98543e-06		0.568354	2.08227e-06		0.568354	2.18006e-06		0.568354	2.22964e-06
0.571248	3.4135e-06		0.571248	3.51489e-06		0.571248	1.98255e-06		0.571248	2.07848e-06		0.571248	2.1753e-06		0.571248	2.22437e-06
0.574142	3.37985e-06		0.574142	3.48361e-06		0.574142	1.97969e-06		0.574142	2.07468e-06		0.574142	2.17056e-06		0.574142	2.21912e-06
0.577035	3.34537e-06		0.577035	3.45221e-06		0.577035	1.97682e-06		0.577035	2.07088e-06		0.577035	2.16584e-06		0.577035	2.21389e-06
0.579929	3.31088e-06		0.579929	3.42067e-06		0.579929	1.97396e-06		0.579929	2.06709e-06		0.579929	2.16114e-06		0.579929	2.20868e-06
0.582823	3.2775e-06		0.582823	3.3896e-06		0.582823	1.9711e-06		0.582823	2.06329e-06		0.582823	2.15646e-06		0.582823	2.2035e-06
0.585717	3.24484e-06		0.585717	3.35945e-06		0.585717	1.96823e-06		0.585717	2.0595e-06		0.585717	2.15179e-06		0.585717	2.19833e-06
0.588611	3.2122e-06		0.588611	3.32988e-06		0.588611	1.96538e-06		0.588611	2.05571e-06		0.588611	2.14714e-06		0.588611	2.19319e-06
0.591505	3.17913e-06		0.591505	3.30057e-06		0.591505	1.96252e-06		0.591505	2.05191e-06		0.591505	2.1425e-06		0.591505	2.18807e-06
0.594399	3.14644e-06		0.594399	3.27128e-06		0.594399	1.95967e-06		0.594399	2.04812e-06		0.594399	2.13788e-06		0.594399	2.18296e-06
0.597293	3.11492e-06		0.597293	3.24203e-06		0.597293	1.95681e-06		0.597293	2.04433e-06		0.597293	2.13327e-06		0.597293	2.17788e-06
0.600186	3.08427e-06		0.600186	3.21341e-06		0.600186	1.95396e-06		0.600186	2.04054e-06		0.600186	2.12867e-06		0.600186	2.17282e-06
0.60308	3.0542e-06		0.60308	3.18593e-06		0.60308	1.95112e-06		0.60308	2.03675e-06		0.60308	2.12408e-06		0.60308	2.16779e-06
0.605974	3.02445e-06		0.605974	3.15947e-06		0.605974	1.94827e-06		0.605974	2.03297e-06		0.605974	2.11949e-06		0.605974	2.16277e-06
0.608868	2.99477e-06		0.608868	3.13378e-06		0.608868	1.94543e-06		0.608868	2.02918e-06		0.608868	2.11492e-06		0.608868	2.15778e-06
0.611762	2.96515e-06		0.611762	3.10862e-06		0.611762	1.9426e-06		0.611762	2.02539e-06		0.611762	2.11036e-06		0.611762	2.1528e-06
0.614656	2.93645e-06		0.614656	3.08381e-06		0.614656	1.93978e-06		0.614656	2.02163e-06		0.614656	2.10584e-06		0.614656	2.14784e-06
0.61755	2.90919e-06		0.61755	3.05919e-06		0.61755	1.93696e-06		0.61755	2.01788e-06		0.61755	2.10136e-06		0.61755	2.14291e-06
0.620444	2.88302e-06		0.620444	3.03463e-06		0.620444	1.93415e-06		0.620444	2.01416e-06		0.620444	2.09692e-06		0.620444	2.13798e-06
0.623338	2.85764e-06		0.623338	3.01021e-06		0.623338	1.93135e-06		0.623338	2.01045e-06		0.623338	2.09253e-06		0.623338	2.13309e-06
0.626231	2.83275e-06		0.626231	2.9865e-06		0.626231	1.92856e-06		0.626231	2.00677e-06		0.626231	2.08818e-06		0.626231	2.12821e-06
0.629125	2.80819e-06		0.629125	2.96383e-06		0.629125	1.92579e-06		0.629125	2.00311e-06		0.629125	2.08387e-06		0.629125	2.12336e-06
0.632019	2.78377e-06		0.632019	2.94195e-06		0.632019	1.92302e-06		0.632019	1.99948e-06		0.632019	2.07962e-06		0.632019	2.11855e-06
0.634913	2.75919e-06		0.634913	2.92065e-06		0.634913	1.92027e-06		0.634913	1.99587e-06		0.634913	2.07542e-06		0.634913	2.11377e-06
0.637807	2.73489e-06		0.637807	2.89971e-06		0.637807	1.91754e-06		0.637807	1.99228e-06		0.637807	2.07128e-06		0.637807	2.10902e-06
0.640701	2.7114e-06		0.640701	2.87891e-06		0.640701	1.91482e-06		0.640701	1.98873e-06		0.640701	2.06721e-06		0.640701	2.10431e-06
0.643595	2.68847e-06		0.643595	2.8579e-06		0.643595	1.91214e-06		0.643595	1.98522e-06		0.643595	2.06324e-06		0.643595	2.09965e-06
0.643595	2.68847e-06		0.643595	2.8579e-06		0.643595	1.91214e-06		0.643595	1.98522e-06		0.643595	2.06324e-06		0.643595	2.09965e-06
0.646489	2.66596e-06		0.646489	2.83687e-06		0.646489	1.90948e-06		0.646489	1.98174e-06		0.646489	2.05934e-06		0.646489	2.09501e-06
0.649383	2.644e-06		0.649383	2.81626e-06		0.649383	1.90682e-06		0.649383	1.97828e-06		0.649383	2.05545e-06		0.649383	2.09039e-06
0.652277	2.62258e-06		0.652277	2.79611e-06		0.652277	1.90416e-06		0.652277	1.97483e-06		0.652277	2.05157e-06		0.652277	2.08576e-06
0.65517	2.60163e-06		0.65517	2.77637e-06		0.65517	1.90151e-06		0.65517	1.97139e-06		0.65517	2.04767e-06		0.65517	2.08112e-06
0.658064	2.58119e-06		0.658064	2.75708e-06		0.658064	1.89886e-06		0.658064	1.96796e-06		0.658064	2.04376e-06		0.658064	2.07645e-06
0.660958	2.56131e-06		0.660958	2.7383e-06		0.660958	1.8962e-06		0.660958	1.96454e-06		0.660958	2.03984e-06		0.660958	2.07176e-06
0.663852	2.542e-06		0.663852	2.71998e-06		0.663852	1.89354e-06		0.663852	1.96112e-06		0.663852	2.03592e-06		0.663852	2.06703e-06
0.666746	2.5233e-06		0.666746	2.70214e-06		0.666746	1.89088e-06		0.666746	1.95772e-06		0.666746	2.03201e-06		0.666746	2.06227e-06
0.66964	2.50521e-06		0.66964	2.68481e-06		0.66964	1.88821e-06		0.66964	1.95431e-06		0.66964	2.02809e-06		0.66964	2.05753e-06
0.672534	2.48767e-06		0.672534	2.66793e-06		0.672534	1.88553e-06		0.672534	1.95091e-06		0.672534	2.02418e-06		0.672534	2.0528e-06
0.675428	2.4707e-06		0.675428	2.65147e-06		0.675428	1.88285e-06		0.675428	1.94752e-06		0.675428	2.02026e-06		0.675428	2.04808e-06
0.678322	2.45437e-06		0.678322	2.63545e-06		0.678322	1.88016e-06		0.678322	1.94412e-06		0.678322	2.01634e-06		0.678322	2.04337e-06
0.681215	2.43861e-06		0.681215	2.61986e-06		0.681215	1.87746e-06		0.681215	1.94073e-06		0.681215	2.01242e-06		0.681215	2.03867e-06
0.684109	2.42336e-06		0.684109	2.60465e-06		0.684109	1.87477e-06		0.684109	1.93735e-06		0.684109	2.0085e-06		0.684109	2.03398e-06
0.687003	2.40858e-06		0.687003	2.58977e-06		0.687003	1.87208e-06		0.687003	1.93396e-06		0.687003	2.00457e-06		0.687003	2.0293e-06
0.689897	2.39427e-06		0.689897	2.57524e-06		0.689897	1.86939e-06		0.689897	1.93058e-06		0.689897	2.00064e-06		0.689897	2.02462e-06
0.692791	2.38037e-06		0.692791	2.56105e-06		0.692791	1.8667e-06		0.692791	1.9272e-06		0.692791	1.99671e-06		0.692791	2.01995e-06
0.695685	2.36679e-06		0.695685	2.54714e-06		0.695685	1.86401e-06		0.695685	1.92383e-06		0.695685	1.99277e-06		0.695685	2.01529e-06
0.698579	2.35357e-06		0.698579	2.53346e-06		0.698579	1.86132e-06		0.698579	1.92045e-06		0.698579	1.98882e-06		0.698579	2.01063e-06
0.701473	2.34075e-06		0.701473	2.52003e-06		0.701473	1.85863e-06		0.701473	1.91708e-06		0.701473	1.98487e-06		0.701473	2.00598e-06
0.704367	2.32828e-06		0.704367	2.50687e-06		0.704367	1.85594e-06		0.704367	1.9137e-06		0.704367	1.98091e-06		0.704367	2.00134e-06
0.70726	2.31609e-06		0.70726	2.49393e-06		0.70726	1.85324e-06		0.70726	1.91031e-06		0.70726	1.97694e-06		0.70726	1.9967e-06
0.710154	2.30414e-06		0.710154	2.48123e-06		0.710154	1.85053e-06		0.710154	1.90691e-06		0.710154	1.97296e-06		0.710154	1.99209e-06
0.713048	2.29243e-06		0.713048	2.46886e-06		0.713048	1.8478e-06		0.713048	1.9035e-06		0.713048	1.96898e-06		0.713048	1.98751e-06
0.715942	2.28098e-06		0.715942	2.45679e-06		0.715942	1.84504e-06		0.715942	1.90005e-06		0.715942	1.96504e-06		0.715942	1.983e-06
0.715942	2.28098e-06		0.715942	2.45679e-06		0.715942	1.84504e-06		0.715942	1.90005e-06		0.715942	1.96504e-06		0.715942	1.983e-06
0.718836	2.26978e-06		0.718836	2.44502e-06		0.718836	1.84227e-06		0.718836	1.8966e-06		0.718836	1.9611e-06		0.718836	1.97853e-06
0.72173	2.25886e-06		0.72173	2.43348e-06		0.72173	1.8395e-06		0.72173	1.89315e-06		0.72173	1.95715e-06		0.72173	1.97404e-06
0.724624	2.24815e-06		0.724624	2.42215e-06		0.724624	1.83672e-06		0.724624	1.88972e-06		0.724624	1.95317e-06		0.724624	1.96953e-06
0.727518	2.23765e-06		0.727518	2.41099e-06		0.727518	1.83394e-06		0.727518	1.8863e-06		0.727518	1.94918e-06		0.727518	1.96499e-06
0.730412	2.22733e-06		0.730412	2.39999e-06		0.730412	1.83114e-06		0.730412	1.88288e-06		0.730412	1.94515e-06		0.730412	1.96042e-06
0.733305	2.21722e-06		0.733305	2.38919e-06		0.733305	1.82834e-06		0.733305	1.87942e-06		0.733305	1.94108e-06		0.733305	1.95582e-06
0.736199	2.20729e-06		0.736199	2.37856e-06		0.736199	1.82553e-06		0.736199	1.87594e-06		0.736199	1.93697e-06		0.736199	1.95117e-06
0.739093	2.19751e-06		0.739093	2.36807e-06		0.739093	1.8227e-06		0.739093	1.87241e-06		0.739093	1.93281e-06		0.739093	1.94646e-06
0.741987	2.18784e-06		0.741987	2.35769e-06		0.741987	1.81985e-06		0.741987	1.86884e-06		0.741987	1.92858e-06		0.741987	1.9417e-06
0.744881	2.17824e-06		0.744881	2.34739e-06		0.744881	1.81698e-06		0.744881	1.86521e-06		0.744881	1.92429e-06		0.744881	1.93687e-06
0.747775	2.16874e-06		0.747775	2.33713e-06		0.747775	1.81408e-06		0.747775	1.86152e-06		0.747775	1.91992e-06		0.747775	1.93196e-06
0.750669	2.15939e-06		0.750669	2.32693e-06		0.750669	1.81116e-06		0.750669	1.85776e-06		0.750669	1.91545e-06		0.750669	1.92697e-06
0.753563	2.15017e-06		0.753563	2.31679e-06		0.753563	1.80819e-06		0.753563	1.85392e-06		0.753563	1.91089e-06		0.753563	1.92189e-06
0.756457	2.14102e-06		0.756457	2.30668e-06		0.756457	1.80517e-06		0.756457	1.84997e-06		0.756457	1.9062e-06		0.756457	1.91669e-06
0.75935	2.1319e-06		0.75935	2.29655e-06		0.75935	1.80209e-06		0.75935	1.84592e-06		0.75935	1.90138e-06		0.75935	1.91131e-06
0.762244	2.12277e-06		0.762244	2.28636e-06		0.762244	1.79891e-06		0.762244	1.84173e-06		0.762244	1.89641e-06		0.762244	1.90575e-06
0.765138	2.11358e-06		0.765138	2.27605e-06		0.765138	1.79563e-06		0.765138	1.83741e-06		0.765138	1.89126e-06		0.765138	1.89998e-06
0.768032	2.10435e-06		0.768032	2.26564e-06		0.768032	1.79223e-06		0.768032	1.83292e-06		0.768032	1.88589e-06		0.768032	1.89398e-06
0.770926	2.0951e-06		0.770926	2.2551e-06		0.770926	1.78871e-06		0.770926	1.82826e-06		0.770926	1.8803e-06		0.770926	1.88775e-06
0.77382	2.0858e-06		0.77382	2.24441e-06		0.77382	1.78504e-06		0.77382	1.82342e-06		0.77382	1.87446e-06		0.77382	1.88126e-06
0.776714	2.07641e-06		0.776714	2.23352e-06		0.776714	1.78123e-06		0.776714	1.81838e-06		0.776714	1.86836e-06		0.776714	1.8745e-06
0.779608	2.06691e-06		0.779608	2.2224e-06		0.779608	1.77726e-06		0.779608	1.81313e-06		0.779608	1.86197e-06		0.779608	1.86745e-06
0.782502	2.05727e-06		0.782502	2.21102e-06		0.782502	1.77313e-06		0.782502	1.80768e-06		0.782502	1.8553e-06		0.782502	1.86012e-06
0.785396	2.04748e-06		0.785396	2.19935e-06		0.785396	1.76885e-06		0.785396	1.80201e-06		0.785396	1.84833e-06		0.785396	1.85248e-06
0.788289	2.03756e-06		0.788289	2.18742e-06		0.788289	1.76441e-06		0.788289	1.7961e-06		0.788289	1.84105e-06		0.788289	1.84455e-06
0.791183	2.02753e-06		0.791183	2.17527e-06		0.791183	1.75983e-06		0.791183	1.78995e-06		0.791183	1.83347e-06		0.791183	1.83631e-06
0.794077	2.01745e-06		0.794077	2.16291e-06		0.794077	1.75511e-06		0.794077	1.78357e-06		0.794077	1.82557e-06		0.794077	1.82772e-06
0.796971	2.00734e-06		0.796971	2.15035e-06		0.796971	1.75026e-06		0.796971	1.77695e-06		0.796971	1.81735e-06		0.796971	1.81879e-06
0.799865	1.9972e-06		0.799865	2.13764e-06		0.799865	1.74529e-06		0.799865	1.7701e-06		0.799865	1.80882e-06		0.799865	1.80952e-06
0.799865	1.9972e-06		0.799865	2.13764e-06		0.799865	1.74529e-06		0.799865	1.7701e-06		0.799865	1.80882e-06		0.799865	1.80952e-06
0.802759	1.98697e-06		0.802759	2.12474e-06		0.802759	1.74013e-06		0.802759	1.76299e-06		0.802759	1.79998e-06		0.802759	1.79991e-06
0.805653	1.97657e-06		0.805653	2.11169e-06		0.805653	1.73467e-06		0.805653	1.7556e-06		0.805653	1.79085e-06		0.805653	1.78994e-06
0.808547	1.96604e-06		0.808547	2.09856e-06		0.808547	1.72892e-06		0.808547	1.74793e-06		0.808547	1.78142e-06		0.808547	1.77963e-06
0.811441	1.95546e-06		0.811441	2.08534e-06		0.811441	1.72286e-06		0.811441	1.73996e-06		0.811441	1.7717e-06		0.811441	1.76897e-06
0.814334	1.94482e-06		0.814334	2.07203e-06		0.814334	1.71647e-06		0.814334	1.73172e-06		0.814334	1.76168e-06		0.814334	1.75797e-06
0.817228	1.93415e-06		0.817228	2.05863e-06		0.817228	1.70971e-06		0.817228	1.72319e-06		0.817228	1.75136e-06		0.817228	1.74665e-06
0.820122	1.92346e-06		0.820122	2.04512e-06		0.820122	1.70258e-06		0.820122	1.71435e-06		0.820122	1.74075e-06		0.820122	1.73502e-06
0.823016	1.91273e-06		0.823016	2.03153e-06		0.823016	1.69505e-06		0.823016	1.70513e-06		0.823016	1.72983e-06		0.823016	1.72308e-06
0.82591	1.90197e-06		0.82591	2.01788e-06		0.82591	1.68712e-06		0.82591	1.69553e-06		0.82591	1.71863e-06		0.82591	1.71087e-06
0.828804	1.89119e-06		0.828804	2.00414e-06		0.828804	1.67877e-06		0.828804	1.68557e-06		0.828804	1.70717e-06		0.828804	1.6984e-06
0.831698	1.88041e-06		0.831698	1.99031e-06		0.831698	1.67001e-06		0.831698	1.67524e-06		0.831698	1.69546e-06		0.831698	1.68568e-06
0.834592	1.86963e-06		0.834592	1.97638e-06		0.834592	1.66083e-06		0.834592	1.66457e-06		0.834592	1.68356e-06		0.834592	1.67273e-06
0.837486	1.85885e-06		0.837486	1.96242e-06		0.837486	1.65124e-06		0.837486	1.65357e-06		0.837486	1.67151e-06		0.837486	1.65956e-06
0.840379	1.84805e-06		0.840379	1.94851e-06		0.840379	1.64127e-06		0.840379	1.64228e-06		0.840379	1.6594e-06		0.840379	1.64623e-06
0.843273	1.83724e-06		0.843273	1.9347e-06		0.843273	1.63091e-06		0.843273	1.6307e-06		0.843273	1.64716e-06		0.843273	1.6328e-06
0.846167	1.82647e-06		0.846167	1.92103e-06		0.846167	1.62018e-06		0.846167	1.61887e-06		0.846167	1.63468e-06		0.846167	1.61931e-06
0.849061	1.81583e-06		0.849061	1.90759e-06		0.849061	1.60914e-06		0.849061	1.60684e-06		0.849061	1.62203e-06		0.849061	1.6058e-06
0.851955	1.80535e-06		0.851955	1.8944e-06		0.851955	1.59785e-06		0.851955	1.59468e-06		0.851955	1.60932e-06		0.851955	1.59236e-06
0.854849	1.79509e-06		0.854849	1.8815e-06		0.854849	1.58641e-06		0.854849	1.58247e-06		0.854849	1.59665e-06		0.854849	1.57907e-06
0.857743	1.7851e-06		0.857743	1.86898e-06		0.857743	1.5749e-06		0.857743	1.57032e-06		0.857743	1.58413e-06		0.857743	1.56604e-06
0.860637	1.77544e-06		0.860637	1.85693e-06		0.860637	1.56348e-06		0.860637	1.55835e-06		0.860637	1.5719e-06		0.860637	1.55337e-06
0.863531	1.76622e-06		0.863531	1.84553e-06		0.863531	1.55229e-06		0.863531	1.54673e-06		0.863531	1.56009e-06		0.863531	1.54121e-06
0.866424	1.75758e-06		0.866424	1.83496e-06		0.866424	1.54159e-06		0.866424	1.53567e-06		0.866424	1.54894e-06		0.866424	1.52978e-06
0.869318	1.74981e-06		0.869318	1.82553e-06		0.869318	1.53169e-06		0.869318	1.52551e-06		0.869318	1.53876e-06		0.869318	1.51938e-06
0.872212	1.74327e-06		0.872212	1.81759e-06		0.872212	1.52309e-06		0.872212	1.51674e-06		0.872212	1.53003e-06		0.872212	1.51049e-06
0.875106	1.73849e-06		0.875106	1.81173e-06		0.875106	1.5166e-06		0.875106	1.51016e-06		0.875106	1.52352e-06		0.875106	1.50389e-06
0.878	1.73665e-06		0.878	1.80942e-06		0.878	1.51401e-06		0.878	1.50755e-06		0.878	1.52094e-06		0.878	1.50128e-06

## Sheet: no distribution 
SN 0			SN 0.2			SN 0.4			SN 0.6			SN 0.8			SN 1
Axial distance	no mass fraction		Axial distance	no mass fraction		Axial distance	no mass fraction		Axial distance	no mass fraction		Axial distance	no mass fraction		Axial distance	no mass fraction
0.00115113	2.02262e-06		0.00115113	2.00257e-06		0.00115113	1.95115e-06		0.00115113	3.24784e-07		0.00115113	1.57816e-07		0.00115113	1.393e-07
0.00404502	2.66768e-06		0.00404502	2.65069e-06		0.00404502	2.36856e-06		0.00404502	4.04718e-07		0.00404502	1.76085e-07		0.00404502	1.48411e-07
0.00693891	3.42183e-06		0.00693891	3.42863e-06		0.00693891	2.74712e-06		0.00693891	4.83198e-07		0.00693891	1.92123e-07		0.00693891	1.5241e-07
0.0098328	4.31552e-06		0.0098328	4.3485e-06		0.0098328	3.04321e-06		0.0098328	5.59605e-07		0.0098328	2.03816e-07		0.0098328	1.51933e-07
0.0127267	5.34098e-06		0.0127267	5.35477e-06		0.0127267	3.23493e-06		0.0127267	6.28293e-07		0.0127267	2.11795e-07		0.0127267	1.47698e-07
0.0156206	6.47177e-06		0.0156206	6.40099e-06		0.0156206	3.32812e-06		0.0156206	6.84558e-07		0.0156206	2.15877e-07		0.0156206	1.4065e-07
0.0185145	7.6605e-06		0.0185145	7.42723e-06		0.0185145	3.35257e-06		0.0185145	7.26547e-07		0.0185145	2.15567e-07		0.0185145	1.31962e-07
0.0214084	8.84545e-06		0.0214084	8.36294e-06		0.0214084	3.3492e-06		0.0214084	7.5633e-07		0.0214084	2.10981e-07		0.0214084	1.22353e-07
0.0243023	9.96092e-06		0.0243023	9.14726e-06		0.0243023	3.34958e-06		0.0243023	7.70782e-07		0.0243023	2.02322e-07		0.0243023	1.12184e-07
0.0271961	1.09465e-05		0.0271961	9.74406e-06		0.0271961	3.36525e-06		0.0271961	7.6991e-07		0.0271961	1.912e-07		0.0271961	1.01439e-07
0.03009	1.17573e-05		0.03009	1.01403e-05		0.03009	3.39179e-06		0.03009	7.56201e-07		0.03009	1.79314e-07		0.03009	9.16746e-08
0.0329839	1.23742e-05		0.0329839	1.03377e-05		0.0329839	3.42392e-06		0.0329839	7.27673e-07		0.0329839	1.68355e-07		0.0329839	8.47217e-08
0.0358778	1.27891e-05		0.0358778	1.03565e-05		0.0358778	3.45322e-06		0.0358778	6.87207e-07		0.0358778	1.58318e-07		0.0358778	8.1977e-08
0.0387717	1.30054e-05		0.0387717	1.02325e-05		0.0387717	3.46954e-06		0.0387717	6.39073e-07		0.0387717	1.50134e-07		0.0387717	8.35966e-08
0.0416656	1.30458e-05		0.0416656	1.00023e-05		0.0416656	3.47275e-06		0.0416656	5.87608e-07		0.0416656	1.46951e-07		0.0416656	8.94528e-08
0.0445595	1.29384e-05		0.0445595	9.70018e-06		0.0445595	3.46513e-06		0.0445595	5.37521e-07		0.0445595	1.51181e-07		0.0445595	1.00599e-07
0.0474534	1.27184e-05		0.0474534	9.36163e-06		0.0474534	3.44721e-06		0.0474534	4.95504e-07		0.0474534	1.65768e-07		0.0474534	1.18293e-07
0.0503473	1.24137e-05		0.0503473	9.02043e-06		0.0503473	3.42029e-06		0.0503473	4.71781e-07		0.0503473	1.97725e-07		0.0503473	1.43511e-07
0.0532412	1.20457e-05		0.0532412	8.70853e-06		0.0532412	3.39346e-06		0.0532412	4.8124e-07		0.0532412	2.60819e-07		0.0532412	1.76906e-07
0.056135	1.16403e-05		0.056135	8.45484e-06		0.056135	3.36414e-06		0.056135	5.70004e-07		0.056135	3.8598e-07		0.056135	2.19391e-07
0.0590289	1.12228e-05		0.0590289	8.28162e-06		0.0590289	3.32307e-06		0.0590289	8.69378e-07		0.0590289	6.53077e-07		0.0590289	2.74605e-07
0.0619228	1.08166e-05		0.0619228	8.20208e-06		0.0619228	3.27293e-06		0.0619228	1.68079e-06		0.0619228	1.23492e-06		0.0619228	3.53327e-07
0.0648167	1.04442e-05		0.0648167	8.21684e-06		0.0648167	3.21681e-06		0.0648167	3.57552e-06		0.0648167	2.5696e-06		0.0648167	4.82576e-07
0.0677106	1.01248e-05		0.0677106	8.3182e-06		0.0677106	3.16136e-06		0.0677106	7.52322e-06		0.0677106	5.47585e-06		0.0677106	7.30271e-07
0.0706045	9.87257e-06		0.0706045	8.49739e-06		0.0706045	3.10303e-06		0.0706045	1.54498e-05		0.0706045	1.12447e-05		0.0706045	1.25541e-06
0.0734984	9.69863e-06		0.0734984	8.74238e-06		0.0734984	3.03358e-06		0.0734984	3.09353e-05		0.0734984	2.15345e-05		0.0734984	2.4056e-06
0.0763923	9.60879e-06		0.0763923	9.03717e-06		0.0763923	2.95545e-06		0.0763923	5.95587e-05		0.0763923	3.87295e-05		0.0763923	4.81827e-06
0.0792862	9.60262e-06		0.0792862	9.36437e-06		0.0792862	2.87364e-06		0.0792862	0.000108179		0.0792862	6.83362e-05		0.0792862	9.56014e-06
0.0821801	9.67649e-06		0.0821801	9.70658e-06		0.0821801	2.78756e-06		0.0821801	0.000181508		0.0821801	0.000116889		0.0821801	1.81269e-05
0.085074	9.82767e-06		0.085074	1.00473e-05		0.085074	2.69772e-06		0.085074	0.000276929		0.085074	0.000187118		0.085074	3.20286e-05
0.085074	9.82767e-06		0.085074	1.00473e-05		0.085074	2.69772e-06		0.085074	0.000276929		0.085074	0.000187118		0.085074	3.20286e-05
0.0879678	1.00545e-05		0.0879678	1.03725e-05		0.0879678	2.60917e-06		0.0879678	0.000383463		0.0879678	0.000275482		0.0879678	5.49088e-05
0.0908617	1.03508e-05		0.0908617	1.06717e-05		0.0908617	2.53622e-06		0.0908617	0.000485384		0.0908617	0.000371327		0.0908617	9.18236e-05
0.0937556	1.07077e-05		0.0937556	1.09412e-05		0.0937556	2.52953e-06		0.0937556	0.000518586		0.0937556	0.000434635		0.0937556	0.000146139
0.0966495	1.11144e-05		0.0966495	1.1171e-05		0.0966495	2.72666e-06		0.0966495	0.000470971		0.0966495	0.000428313		0.0966495	0.000218382
0.0995434	1.1558e-05		0.0995434	1.13555e-05		0.0995434	3.4998e-06		0.0995434	0.000405208		0.0995434	0.000378997		0.0995434	0.000304491
0.102437	1.20276e-05		0.102437	1.15022e-05		0.102437	5.64795e-06		0.102437	0.00034545		0.102437	0.000327638		0.102437	0.000395073
0.105331	1.25125e-05		0.105331	1.16159e-05		0.105331	1.04479e-05		0.105331	0.000295821		0.105331	0.000284795		0.105331	0.000450871
0.108225	1.30034e-05		0.108225	1.17031e-05		0.108225	1.99825e-05		0.108225	0.000254929		0.108225	0.000250272		0.108225	0.000444914
0.111119	1.34976e-05		0.111119	1.17692e-05		0.111119	3.7457e-05		0.111119	0.000221493		0.111119	0.000222956		0.111119	0.000405035
0.114013	1.39748e-05		0.114013	1.18209e-05		0.114013	6.68937e-05		0.114013	0.000194215		0.114013	0.000201342		0.114013	0.00036122
0.116907	1.44248e-05		0.116907	1.18678e-05		0.116907	0.000111895		0.116907	0.000171977		0.116907	0.000184128		0.116907	0.000322993
0.119801	1.48411e-05		0.119801	1.19192e-05		0.119801	0.000174864		0.119801	0.00015385		0.119801	0.00017045		0.119801	0.000291676
0.122695	1.52108e-05		0.122695	1.19819e-05		0.122695	0.000255722		0.122695	0.00013911		0.122695	0.000159625		0.122695	0.000266881
0.125588	1.55373e-05		0.125588	1.20623e-05		0.125588	0.00035071		0.125588	0.000127146		0.125588	0.000151101		0.125588	0.000247301
0.128482	1.58193e-05		0.128482	1.21674e-05		0.128482	0.000453518		0.128482	0.000117435		0.128482	0.000144392		0.128482	0.000231877
0.131376	1.60564e-05		0.131376	1.23031e-05		0.131376	0.000554751		0.131376	0.000109563		0.131376	0.000139117		0.131376	0.000219835
0.13427	1.62498e-05		0.13427	1.2476e-05		0.13427	0.000612964		0.13427	0.000103224		0.13427	0.000134976		0.13427	0.000210369
0.137164	1.64012e-05		0.137164	1.26844e-05		0.137164	0.000602392		0.137164	9.81593e-05		0.137164	0.000131727		0.137164	0.000202895
0.140058	1.65134e-05		0.140058	1.29266e-05		0.140058	0.000549881		0.140058	9.41547e-05		0.140058	0.000129171		0.140058	0.000197061
0.142952	1.65902e-05		0.142952	1.32108e-05		0.142952	0.000482289		0.142952	9.10226e-05		0.142952	0.000127147		0.142952	0.000192584
0.145846	1.66359e-05		0.145846	1.35308e-05		0.145846	0.000415363		0.145846	8.85833e-05		0.145846	0.000125526		0.145846	0.000189163
0.14874	1.66542e-05		0.14874	1.38829e-05		0.14874	0.000356101		0.14874	8.66858e-05		0.14874	0.00012421		0.14874	0.000186561
0.151633	1.66499e-05		0.151633	1.42633e-05		0.151633	0.000304756		0.151633	8.5218e-05		0.151633	0.000123119		0.151633	0.00018459
0.154527	1.66277e-05		0.154527	1.46699e-05		0.154527	0.000260382		0.154527	8.40868e-05		0.154527	0.00012219		0.154527	0.000183106
0.157421	1.65924e-05		0.157421	1.50983e-05		0.157421	0.000222706		0.157421	8.32158e-05		0.157421	0.000121379		0.157421	0.000181993
0.160315	1.65493e-05		0.160315	1.55442e-05		0.160315	0.000191169		0.160315	8.25432e-05		0.160315	0.000120654		0.160315	0.000181161
0.163209	1.65019e-05		0.163209	1.60027e-05		0.163209	0.000164959		0.163209	8.20199e-05		0.163209	0.000119991		0.163209	0.000180542
0.166103	1.64533e-05		0.166103	1.64624e-05		0.166103	0.000143178		0.166103	8.16112e-05		0.166103	0.00011938		0.166103	0.000180073
0.166103	1.64533e-05		0.166103	1.64624e-05		0.166103	0.000143178		0.166103	8.16112e-05		0.166103	0.00011938		0.166103	0.000180073
0.168997	1.6408e-05		0.168997	1.69307e-05		0.168997	0.000125037		0.168997	8.12823e-05		0.168997	0.000118831		0.168997	0.000179657
0.171891	1.63697e-05		0.171891	1.74049e-05		0.171891	0.000109932		0.171891	8.10027e-05		0.171891	0.000118353		0.171891	0.000179227
0.174785	1.63454e-05		0.174785	1.78763e-05		0.174785	9.73299e-05		0.174785	8.07581e-05		0.174785	0.000117934		0.174785	0.00017877
0.177678	1.63375e-05		0.177678	1.83409e-05		0.177678	8.68003e-05		0.177678	8.05375e-05		0.177678	0.000117562		0.177678	0.000178285
0.180572	1.63432e-05		0.180572	1.88003e-05		0.180572	7.80793e-05		0.180572	8.03333e-05		0.180572	0.000117228		0.180572	0.000177769
0.183466	1.63641e-05		0.183466	1.92472e-05		0.183466	7.09518e-05		0.183466	8.01396e-05		0.183466	0.000116927		0.183466	0.000177222
0.18636	1.64028e-05		0.18636	1.96792e-05		0.18636	6.52034e-05		0.18636	7.99527e-05		0.18636	0.000116655		0.18636	0.000176644
0.189254	1.64612e-05		0.189254	2.00952e-05		0.189254	6.05936e-05		0.189254	7.97699e-05		0.189254	0.000116407		0.189254	0.000176034
0.192148	1.65418e-05		0.192148	2.04899e-05		0.192148	5.69376e-05		0.192148	7.95897e-05		0.192148	0.000116181		0.192148	0.0001754
0.195042	1.66449e-05		0.195042	2.08741e-05		0.195042	5.41124e-05		0.195042	7.94111e-05		0.195042	0.000115976		0.195042	0.000174748
0.197936	1.67719e-05		0.197936	2.12522e-05		0.197936	5.19881e-05		0.197936	7.92335e-05		0.197936	0.000115789		0.197936	0.00017408
0.20083	1.69229e-05		0.20083	2.16127e-05		0.20083	5.04505e-05		0.20083	7.90569e-05		0.20083	0.000115621		0.20083	0.000173398
0.203723	1.7098e-05		0.203723	2.19519e-05		0.203723	4.94001e-05		0.203723	7.88811e-05		0.203723	0.000115471		0.203723	0.000172703
0.206617	1.73011e-05		0.206617	2.22777e-05		0.206617	4.87515e-05		0.206617	7.87063e-05		0.206617	0.000115338		0.206617	0.000171998
0.209511	1.75303e-05		0.209511	2.25971e-05		0.209511	4.84309e-05		0.209511	7.8533e-05		0.209511	0.000115224		0.209511	0.000171283
0.212405	1.77859e-05		0.212405	2.29091e-05		0.212405	4.83852e-05		0.212405	7.83619e-05		0.212405	0.00011513		0.212405	0.000170559
0.215299	1.80666e-05		0.215299	2.32143e-05		0.215299	4.86097e-05		0.215299	7.81947e-05		0.215299	0.00011506		0.215299	0.000169828
0.215299	1.80666e-05		0.215299	2.32143e-05		0.215299	4.86097e-05		0.215299	7.81947e-05		0.215299	0.00011506		0.215299	0.000169828
0.218193	1.83741e-05		0.218193	2.35245e-05		0.218193	4.90122e-05		0.218193	7.80259e-05		0.218193	0.000114994		0.218193	0.000169089
0.221087	1.87175e-05		0.221087	2.38482e-05		0.221087	4.94423e-05		0.221087	7.78469e-05		0.221087	0.000114902		0.221087	0.000168342
0.223981	1.90905e-05		0.223981	2.41918e-05		0.223981	4.98298e-05		0.223981	7.76547e-05		0.223981	0.00011477		0.223981	0.000167585
0.226875	1.94897e-05		0.226875	2.45658e-05		0.226875	5.01436e-05		0.226875	7.74489e-05		0.226875	0.000114591		0.226875	0.000166819
0.229768	1.99235e-05		0.229768	2.49691e-05		0.229768	5.03791e-05		0.229768	7.72307e-05		0.229768	0.000114368		0.229768	0.000166043
0.232662	2.03861e-05		0.232662	2.54e-05		0.232662	5.05432e-05		0.232662	7.70016e-05		0.232662	0.000114106		0.232662	0.000165257
0.235556	2.08706e-05		0.235556	2.58662e-05		0.235556	5.06459e-05		0.235556	7.67631e-05		0.235556	0.000113815		0.235556	0.000164461
0.23845	2.13812e-05		0.23845	2.63715e-05		0.23845	5.06975e-05		0.23845	7.65167e-05		0.23845	0.000113497		0.23845	0.000163652
0.241344	2.1919e-05		0.241344	2.69179e-05		0.241344	5.07067e-05		0.241344	7.62633e-05		0.241344	0.000113158		0.241344	0.000162831
0.244238	2.24823e-05		0.244238	2.75076e-05		0.244238	5.06807e-05		0.244238	7.60037e-05		0.244238	0.0001128		0.244238	0.000162
0.247132	2.30686e-05		0.247132	2.81448e-05		0.247132	5.06254e-05		0.247132	7.57385e-05		0.247132	0.000112425		0.247132	0.000161169
0.250026	2.36768e-05		0.250026	2.88334e-05		0.250026	5.05459e-05		0.250026	7.5468e-05		0.250026	0.000112037		0.250026	0.000160346
0.25292	2.43097e-05		0.25292	2.95725e-05		0.25292	5.04463e-05		0.25292	7.51945e-05		0.25292	0.000111637		0.25292	0.000159529
0.255814	2.49674e-05		0.255814	3.03627e-05		0.255814	5.033e-05		0.255814	7.49204e-05		0.255814	0.000111226		0.255814	0.000158719
0.258707	2.56455e-05		0.258707	3.12118e-05		0.258707	5.01999e-05		0.258707	7.46459e-05		0.258707	0.000110807		0.258707	0.000157914
0.261601	2.6344e-05		0.261601	3.21292e-05		0.261601	5.00583e-05		0.261601	7.43713e-05		0.261601	0.00011038		0.261601	0.000157116
0.264495	2.70666e-05		0.264495	3.31261e-05		0.264495	4.99073e-05		0.264495	7.40969e-05		0.264495	0.000109946		0.264495	0.000156323
0.267389	2.78175e-05		0.267389	3.42138e-05		0.267389	4.97484e-05		0.267389	7.38227e-05		0.267389	0.000109507		0.267389	0.000155535
0.270283	2.85944e-05		0.270283	3.54038e-05		0.270283	4.95829e-05		0.270283	7.35491e-05		0.270283	0.000109062		0.270283	0.000154753
0.273177	2.93918e-05		0.273177	3.67049e-05		0.273177	4.9412e-05		0.273177	7.32761e-05		0.273177	0.000108613		0.273177	0.000153976
0.276071	3.0211e-05		0.276071	3.81241e-05		0.276071	4.92366e-05		0.276071	7.30039e-05		0.276071	0.000108161		0.276071	0.000153203
0.278965	3.10549e-05		0.278965	3.96695e-05		0.278965	4.90574e-05		0.278965	7.27325e-05		0.278965	0.000107704		0.278965	0.000152434
0.281859	3.19273e-05		0.281859	4.13527e-05		0.281859	4.88751e-05		0.281859	7.24622e-05		0.281859	0.000107244		0.281859	0.000151668
0.284752	3.28327e-05		0.284752	4.31857e-05		0.284752	4.86902e-05		0.284752	7.21928e-05		0.284752	0.000106781		0.284752	0.000150905
0.287646	3.3776e-05		0.287646	4.51715e-05		0.287646	4.85031e-05		0.287646	7.19246e-05		0.287646	0.000106315		0.287646	0.000150147
0.29054	3.47633e-05		0.29054	4.73102e-05		0.29054	4.83143e-05		0.29054	7.16573e-05		0.29054	0.000105845		0.29054	0.000149399
0.293434	3.58009e-05		0.293434	4.96062e-05		0.293434	4.81242e-05		0.293434	7.13911e-05		0.293434	0.000105375		0.293434	0.000148663
0.296328	3.68977e-05		0.296328	5.20659e-05		0.296328	4.79333e-05		0.296328	7.11258e-05		0.296328	0.000104904		0.296328	0.000147941
0.299222	3.80622e-05		0.299222	5.47029e-05		0.299222	4.77415e-05		0.299222	7.08612e-05		0.299222	0.000104431		0.299222	0.000147234
0.302116	3.93018e-05		0.302116	5.75246e-05		0.302116	4.75492e-05		0.302116	7.05972e-05		0.302116	0.000103957		0.302116	0.000146541
0.30501	4.06269e-05		0.30501	6.05298e-05		0.30501	4.73545e-05		0.30501	7.03336e-05		0.30501	0.000103481		0.30501	0.000145862
0.307904	4.20498e-05		0.307904	6.37206e-05		0.307904	4.71556e-05		0.307904	7.00701e-05		0.307904	0.000103004		0.307904	0.000145197
0.310797	4.35838e-05		0.310797	6.71001e-05		0.310797	4.69529e-05		0.310797	6.98062e-05		0.310797	0.000102524		0.310797	0.000144544
0.313691	4.52475e-05		0.313691	7.06772e-05		0.313691	4.67473e-05		0.313691	6.95415e-05		0.313691	0.000102042		0.313691	0.000143899
0.313691	4.52475e-05		0.313691	7.06772e-05		0.313691	4.67473e-05		0.313691	6.95415e-05		0.313691	0.000102042		0.313691	0.000143899
0.316585	4.70578e-05		0.316585	7.44563e-05		0.316585	4.65411e-05		0.316585	6.92728e-05		0.316585	0.000101558		0.316585	0.000143239
0.319479	4.90308e-05		0.319479	7.84391e-05		0.319479	4.63358e-05		0.319479	6.89972e-05		0.319479	0.000101073		0.319479	0.000142546
0.322373	5.11876e-05		0.322373	8.26318e-05		0.322373	4.61318e-05		0.322373	6.87148e-05		0.322373	0.000100586		0.322373	0.000141818
0.325267	5.35459e-05		0.325267	8.70351e-05		0.325267	4.59292e-05		0.325267	6.84295e-05		0.325267	0.000100096		0.325267	0.00014106
0.328161	5.61226e-05		0.328161	9.16589e-05		0.328161	4.5728e-05		0.328161	6.81452e-05		0.328161	9.9604e-05		0.328161	0.000140273
0.331055	5.89314e-05		0.331055	9.65037e-05		0.331055	4.55284e-05		0.331055	6.78618e-05		0.331055	9.91083e-05		0.331055	0.000139466
0.333949	6.19893e-05		0.333949	0.000101559		0.333949	4.53306e-05		0.333949	6.75791e-05		0.333949	9.86088e-05		0.333949	0.000138645
0.336842	6.5318e-05		0.336842	0.000106828		0.336842	4.5135e-05		0.336842	6.72973e-05		0.336842	9.81046e-05		0.336842	0.000137813
0.339736	6.89351e-05		0.339736	0.000112329		0.339736	4.49417e-05		0.339736	6.70162e-05		0.339736	9.7595e-05		0.339736	0.000136971
0.34263	7.28551e-05		0.34263	0.000118072		0.34263	4.47511e-05		0.34263	6.67359e-05		0.34263	9.70829e-05		0.34263	0.000136122
0.345524	7.70958e-05		0.345524	0.000124071		0.345524	4.45632e-05		0.345524	6.64562e-05		0.345524	9.6572e-05		0.345524	0.000135267
0.348418	8.16816e-05		0.348418	0.000130359		0.348418	4.43784e-05		0.348418	6.61772e-05		0.348418	9.60623e-05		0.348418	0.000134407
0.351312	8.66306e-05		0.351312	0.000136955		0.351312	4.41968e-05		0.351312	6.58988e-05		0.351312	9.55537e-05		0.351312	0.000133542
0.354206	9.19533e-05		0.354206	0.0001439		0.354206	4.40188e-05		0.354206	6.56209e-05		0.354206	9.50465e-05		0.354206	0.000132675
0.3571	9.76703e-05		0.3571	0.000151256		0.3571	4.38444e-05		0.3571	6.53435e-05		0.3571	9.45409e-05		0.3571	0.000131805
0.359994	0.000103801		0.359994	0.00015909		0.359994	4.3674e-05		0.359994	6.50664e-05		0.359994	9.40369e-05		0.359994	0.000130933
0.362887	0.000110367		0.362887	0.000167481		0.362887	4.35078e-05		0.362887	6.47898e-05		0.362887	9.35349e-05		0.362887	0.000130058
0.365781	0.000117384		0.365781	0.00017652		0.365781	4.33461e-05		0.365781	6.45134e-05		0.365781	9.30353e-05		0.365781	0.000129183
0.368675	0.000124863		0.368675	0.000186302		0.368675	4.31893e-05		0.368675	6.42372e-05		0.368675	9.25384e-05		0.368675	0.000128313
0.371569	0.000132819		0.371569	0.000196941		0.371569	4.30378e-05		0.371569	6.3961e-05		0.371569	9.20448e-05		0.371569	0.000127457
0.374463	0.000141277		0.374463	0.000208529		0.374463	4.28923e-05		0.374463	6.36848e-05		0.374463	9.1555e-05		0.374463	0.000126616
0.377357	0.000150275		0.377357	0.000221106		0.377357	4.27542e-05		0.377357	6.34084e-05		0.377357	9.10693e-05		0.377357	0.00012579
0.380251	0.000159866		0.380251	0.000234677		0.380251	4.26255e-05		0.380251	6.31313e-05		0.380251	9.05882e-05		0.380251	0.00012498
0.383145	0.000170114		0.383145	0.000249248		0.383145	4.25094e-05		0.383145	6.28517e-05		0.383145	9.01112e-05		0.383145	0.000124187
0.386039	0.000181089		0.386039	0.000264863		0.386039	4.23997e-05		0.386039	6.2572e-05		0.386039	8.96383e-05		0.386039	0.000123411
0.388932	0.000192867		0.388932	0.000281582		0.388932	4.229e-05		0.388932	6.22981e-05		0.388932	8.91717e-05		0.388932	0.000122654
0.391826	0.000205533		0.391826	0.000299468		0.391826	4.21828e-05		0.391826	6.20325e-05		0.391826	8.87105e-05		0.391826	0.000121914
0.39472	0.000219176		0.39472	0.000318572		0.39472	4.20794e-05		0.39472	6.17755e-05		0.39472	8.82526e-05		0.39472	0.000121193
0.397614	0.000233878		0.397614	0.000338927		0.397614	4.19796e-05		0.397614	6.15272e-05		0.397614	8.7799e-05		0.397614	0.000120491
0.400508	0.000249697		0.400508	0.000360632		0.400508	4.18823e-05		0.400508	6.12882e-05		0.400508	8.73503e-05		0.400508	0.000119811
0.403402	0.000266673		0.403402	0.000383909		0.403402	4.17851e-05		0.403402	6.10598e-05		0.403402	8.69064e-05		0.403402	0.000119153
0.403402	0.000266673		0.403402	0.000383909		0.403402	4.17851e-05		0.403402	6.10598e-05		0.403402	8.69064e-05		0.403402	0.000119153
0.406296	0.000284801		0.406296	0.000409146		0.406296	4.16894e-05		0.406296	6.08341e-05		0.406296	8.64616e-05		0.406296	0.000118502
0.40919	0.000304072		0.40919	0.000436608		0.40919	4.15965e-05		0.40919	6.0603e-05		0.40919	8.60103e-05		0.40919	0.000117841
0.412084	0.000324518		0.412084	0.000466684		0.412084	4.15035e-05		0.412084	6.03677e-05		0.412084	8.55526e-05		0.412084	0.000117171
0.414977	0.000346225		0.414977	0.000500193		0.414977	4.14086e-05		0.414977	6.01282e-05		0.414977	8.50894e-05		0.414977	0.000116491
0.417871	0.000369344		0.417871	0.000538162		0.417871	4.13109e-05		0.417871	5.98844e-05		0.417871	8.46214e-05		0.417871	0.000115803
0.420765	0.00039404		0.420765	0.000582319		0.420765	4.12097e-05		0.420765	5.96365e-05		0.420765	8.41492e-05		0.420765	0.000115106
0.423659	0.000420422		0.423659	0.000635205		0.423659	4.11047e-05		0.423659	5.93847e-05		0.423659	8.36732e-05		0.423659	0.000114403
0.426553	0.000448665		0.426553	0.000700155		0.426553	4.09958e-05		0.426553	5.91294e-05		0.426553	8.31939e-05		0.426553	0.000113693
0.429447	0.000479147		0.429447	0.000780814		0.429447	4.0883e-05		0.429447	5.88711e-05		0.429447	8.27119e-05		0.429447	0.000112979
0.432341	0.000512709		0.432341	0.000875454		0.432341	4.07663e-05		0.432341	5.86105e-05		0.432341	8.22277e-05		0.432341	0.000112261
0.435235	0.000550566		0.435235	0.000976842		0.435235	4.06457e-05		0.435235	5.83483e-05		0.435235	8.17414e-05		0.435235	0.000111543
0.438129	0.000593965		0.438129	0.0010741		0.438129	4.05212e-05		0.438129	5.80851e-05		0.438129	8.12531e-05		0.438129	0.000110824
0.441023	0.000645339		0.441023	0.00116156		0.441023	4.03925e-05		0.441023	5.78215e-05		0.441023	8.07633e-05		0.441023	0.000110103
0.443916	0.00070918		0.443916	0.00123881		0.443916	4.02596e-05		0.443916	5.75583e-05		0.443916	8.02723e-05		0.443916	0.000109378
0.44681	0.000789508		0.44681	0.00130425		0.44681	4.01221e-05		0.44681	5.72944e-05		0.44681	7.97805e-05		0.44681	0.000108652
0.449704	0.000882076		0.449704	0.00135829		0.449704	3.99796e-05		0.449704	5.7029e-05		0.449704	7.92884e-05		0.449704	0.000107924
0.452598	0.000972967		0.452598	0.00140201		0.452598	3.98315e-05		0.452598	5.67622e-05		0.452598	7.87961e-05		0.452598	0.000107195
0.455492	0.00105471		0.455492	0.001436		0.455492	3.96774e-05		0.455492	5.64945e-05		0.455492	7.8304e-05		0.455492	0.000106467
0.458386	0.00112674		0.458386	0.00145919		0.458386	3.9516e-05		0.458386	5.6226e-05		0.458386	7.78123e-05		0.458386	0.00010574
0.46128	0.00118688		0.46128	0.00147289		0.46128	3.93506e-05		0.46128	5.5957e-05		0.46128	7.73211e-05		0.46128	0.000105016
0.464174	0.00123484		0.464174	0.00148021		0.464174	3.91852e-05		0.464174	5.56875e-05		0.464174	7.68306e-05		0.464174	0.000104293
0.467068	0.00127117		0.467068	0.00147877		0.467068	3.90206e-05		0.467068	5.54178e-05		0.467068	7.63408e-05		0.467068	0.000103574
0.469961	0.00129537		0.469961	0.00146496		0.469961	3.88571e-05		0.469961	5.5148e-05		0.469961	7.58516e-05		0.469961	0.000102859
0.472855	0.00130848		0.472855	0.00144283		0.472855	3.86947e-05		0.472855	5.48782e-05		0.472855	7.5363e-05		0.472855	0.000102148
0.475749	0.00131225		0.475749	0.00141414		0.475749	3.85335e-05		0.475749	5.46087e-05		0.475749	7.48748e-05		0.475749	0.000101442
0.478643	0.00130799		0.478643	0.00137953		0.478643	3.83736e-05		0.478643	5.43394e-05		0.478643	7.43895e-05		0.478643	0.000100741
0.481537	0.00129719		0.481537	0.00134225		0.481537	3.82149e-05		0.481537	5.40705e-05		0.481537	7.391e-05		0.481537	0.000100045
0.484431	0.00128048		0.484431	0.00130294		0.484431	3.80575e-05		0.484431	5.38022e-05		0.484431	7.34364e-05		0.484431	9.93548e-05
0.487325	0.00125771		0.487325	0.00126219		0.487325	3.79013e-05		0.487325	5.35345e-05		0.487325	7.29689e-05		0.487325	9.86708e-05
0.490219	0.00122975		0.490219	0.00122016		0.490219	3.77463e-05		0.490219	5.32675e-05		0.490219	7.25077e-05		0.490219	9.79931e-05
0.493113	0.00119823		0.493113	0.00117702		0.493113	3.75923e-05		0.493113	5.30013e-05		0.493113	7.20529e-05		0.493113	9.73219e-05
0.496006	0.00116394		0.496006	0.00113332		0.496006	3.74395e-05		0.496006	5.2736e-05		0.496006	7.16049e-05		0.496006	9.66573e-05
0.4989	0.00112745		0.4989	0.00108949		0.4989	3.72876e-05		0.4989	5.24717e-05		0.4989	7.11636e-05		0.4989	9.59994e-05
0.501794	0.00108937		0.501794	0.00104577		0.501794	3.71369e-05		0.501794	5.22083e-05		0.501794	7.07294e-05		0.501794	9.5348e-05
0.504688	0.00105054		0.504688	0.00100243		0.504688	3.69871e-05		0.504688	5.1946e-05		0.504688	7.03024e-05		0.504688	9.47031e-05
0.507582	0.00101079		0.507582	0.000959889		0.507582	3.68385e-05		0.507582	5.16849e-05		0.507582	6.98827e-05		0.507582	9.40645e-05
0.510476	0.000970254		0.510476	0.000918249		0.510476	3.66909e-05		0.510476	5.14249e-05		0.510476	6.94703e-05		0.510476	9.34333e-05
0.51337	0.000929847		0.51337	0.00087743		0.51337	3.65446e-05		0.51337	5.11662e-05		0.51337	6.90651e-05		0.51337	9.28101e-05
0.516264	0.000889791		0.516264	0.000837673		0.516264	3.63996e-05		0.516264	5.09088e-05		0.516264	6.86671e-05		0.516264	9.21954e-05
0.519158	0.000850193		0.519158	0.000799095		0.519158	3.62562e-05		0.519158	5.06527e-05		0.519158	6.8276e-05		0.519158	9.15892e-05
0.522051	0.000811368		0.522051	0.000761721		0.522051	3.61147e-05		0.522051	5.0398e-05		0.522051	6.78983e-05		0.522051	9.0992e-05
0.524945	0.000773273		0.524945	0.000725745		0.524945	3.59756e-05		0.524945	5.01448e-05		0.524945	6.75419e-05		0.524945	9.04041e-05
0.524945	0.000773273		0.524945	0.000725745		0.524945	3.59756e-05		0.524945	5.01448e-05		0.524945	6.75419e-05		0.524945	9.04041e-05
0.527839	0.000736095		0.527839	0.000691252		0.527839	3.58373e-05		0.527839	4.9893e-05		0.527839	6.71967e-05		0.527839	8.98232e-05
0.530733	0.00070016		0.530733	0.000658111		0.530733	3.56979e-05		0.530733	4.96425e-05		0.530733	6.68512e-05		0.530733	8.92462e-05
0.533627	0.000665625		0.533627	0.000626325		0.533627	3.55571e-05		0.533627	4.93935e-05		0.533627	6.65052e-05		0.533627	8.8673e-05
0.536521	0.000632526		0.536521	0.000596074		0.536521	3.54155e-05		0.536521	4.91459e-05		0.536521	6.61583e-05		0.536521	8.81033e-05
0.539415	0.000600763		0.539415	0.000567378		0.539415	3.52734e-05		0.539415	4.88998e-05		0.539415	6.58101e-05		0.539415	8.7537e-05
0.542309	0.000570237		0.542309	0.000540063		0.542309	3.51309e-05		0.542309	4.86553e-05		0.542309	6.54602e-05		0.542309	8.69741e-05
0.545203	0.000541039		0.545203	0.000514013		0.545203	3.49876e-05		0.545203	4.84124e-05		0.545203	6.51079e-05		0.545203	8.64144e-05
0.548096	0.000513239		0.548096	0.000489232		0.548096	3.48436e-05		0.548096	4.81711e-05		0.548096	6.47525e-05		0.548096	8.58573e-05
0.55099	0.000486822		0.55099	0.000465753		0.55099	3.46985e-05		0.55099	4.79315e-05		0.55099	6.43933e-05		0.55099	8.53024e-05
0.553884	0.000461832		0.553884	0.000443457		0.553884	3.45523e-05		0.553884	4.76936e-05		0.553884	6.40295e-05		0.553884	8.47495e-05
0.556778	0.000438058		0.556778	0.00042217		0.556778	3.44062e-05		0.556778	4.74571e-05		0.556778	6.36601e-05		0.556778	8.41986e-05
0.559672	0.000415328		0.559672	0.000401887		0.559672	3.4261e-05		0.559672	4.72212e-05		0.559672	6.3284e-05		0.559672	8.36499e-05
0.562566	0.000393719		0.562566	0.000382684		0.562566	3.41168e-05		0.562566	4.69861e-05		0.562566	6.29002e-05		0.562566	8.31033e-05
0.56546	0.000373414		0.56546	0.000364643		0.56546	3.39733e-05		0.56546	4.67516e-05		0.56546	6.25134e-05		0.56546	8.2559e-05
0.568354	0.000354237		0.568354	0.000347575		0.568354	3.38304e-05		0.568354	4.65178e-05		0.568354	6.21292e-05		0.568354	8.20171e-05
0.571248	0.000335958		0.571248	0.000331266		0.571248	3.36881e-05		0.571248	4.62847e-05		0.571248	6.17476e-05		0.571248	8.14778e-05
0.574142	0.000318666		0.574142	0.000315802		0.574142	3.35464e-05		0.574142	4.60523e-05		0.574142	6.13685e-05		0.574142	8.09413e-05
0.577035	0.00030245		0.577035	0.000301207		0.577035	3.34053e-05		0.577035	4.58206e-05		0.577035	6.09918e-05		0.577035	8.04079e-05
0.579929	0.000287067		0.579929	0.000287494		0.579929	3.32647e-05		0.579929	4.55897e-05		0.579929	6.06173e-05		0.579929	7.98776e-05
0.582823	0.000272276		0.582823	0.000274435		0.582823	3.31247e-05		0.582823	4.53597e-05		0.582823	6.02449e-05		0.582823	7.93509e-05
0.585717	0.000258178		0.585717	0.000261851		0.585717	3.29853e-05		0.585717	4.51305e-05		0.585717	5.98744e-05		0.585717	7.88278e-05
0.588611	0.000244881		0.588611	0.000249866		0.588611	3.28465e-05		0.588611	4.49023e-05		0.588611	5.95058e-05		0.588611	7.83087e-05
0.591505	0.000232525		0.591505	0.000238556		0.591505	3.27082e-05		0.591505	4.4675e-05		0.591505	5.91389e-05		0.591505	7.77936e-05
0.594399	0.000220932		0.594399	0.000227987		0.594399	3.25704e-05		0.594399	4.44487e-05		0.594399	5.87734e-05		0.594399	7.72829e-05
0.597293	0.000209861		0.597293	0.00021828		0.597293	3.24329e-05		0.597293	4.42235e-05		0.597293	5.84092e-05		0.597293	7.67767e-05
0.600186	0.000199329		0.600186	0.000209146		0.600186	3.22956e-05		0.600186	4.39995e-05		0.600186	5.80461e-05		0.600186	7.62752e-05
0.60308	0.000189409		0.60308	0.000200266		0.60308	3.21582e-05		0.60308	4.37766e-05		0.60308	5.76837e-05		0.60308	7.57783e-05
0.605974	0.000180152		0.605974	0.000191654		0.605974	3.20202e-05		0.605974	4.3555e-05		0.605974	5.73217e-05		0.605974	7.52862e-05
0.608868	0.000171606		0.608868	0.000183372		0.608868	3.18833e-05		0.608868	4.33347e-05		0.608868	5.69595e-05		0.608868	7.47987e-05
0.611762	0.000163722		0.611762	0.000175489		0.611762	3.17494e-05		0.611762	4.31157e-05		0.611762	5.66003e-05		0.611762	7.43158e-05
0.614656	0.000156136		0.614656	0.000168048		0.614656	3.16184e-05		0.614656	4.28982e-05		0.614656	5.62477e-05		0.614656	7.38372e-05
0.61755	0.000148662		0.61755	0.000161095		0.61755	3.14902e-05		0.61755	4.26822e-05		0.61755	5.59023e-05		0.61755	7.3363e-05
0.620444	0.000141412		0.620444	0.000154664		0.620444	3.13649e-05		0.620444	4.24677e-05		0.620444	5.55641e-05		0.620444	7.2893e-05
0.623338	0.000134476		0.623338	0.000148688		0.623338	3.12421e-05		0.623338	4.22548e-05		0.623338	5.52335e-05		0.623338	7.2428e-05
0.626231	0.000127951		0.626231	0.000142927		0.626231	3.11218e-05		0.626231	4.20435e-05		0.626231	5.49107e-05		0.626231	7.19689e-05
0.629125	0.000121882		0.629125	0.000137233		0.629125	3.10041e-05		0.629125	4.1834e-05		0.629125	5.45961e-05		0.629125	7.15169e-05
0.632019	0.000116334		0.632019	0.000131705		0.632019	3.08889e-05		0.632019	4.16262e-05		0.632019	5.429e-05		0.632019	7.10728e-05
0.634913	0.000111417		0.634913	0.000126464		0.634913	3.07764e-05		0.634913	4.14203e-05		0.634913	5.39931e-05		0.634913	7.0637e-05
0.637807	0.000106951		0.637807	0.000121545		0.637807	3.06671e-05		0.637807	4.12164e-05		0.637807	5.37065e-05		0.637807	7.02099e-05
0.640701	0.000102695		0.640701	0.000117048		0.640701	3.05618e-05		0.640701	4.10147e-05		0.640701	5.34324e-05		0.640701	6.97923e-05
0.643595	9.87981e-05		0.643595	0.000113123		0.643595	3.0462e-05		0.643595	4.08156e-05		0.643595	5.31743e-05		0.643595	6.93856e-05
0.643595	9.87981e-05		0.643595	0.000113123		0.643595	3.0462e-05		0.643595	4.08156e-05		0.643595	5.31743e-05		0.643595	6.93856e-05
0.646489	9.52807e-05		0.646489	0.000109676		0.646489	3.03656e-05		0.646489	4.06186e-05		0.646489	5.29269e-05		0.646489	6.89868e-05
0.649383	9.20312e-05		0.649383	0.000106502		0.649383	3.02694e-05		0.649383	4.04231e-05		0.649383	5.26816e-05		0.649383	6.85911e-05
0.652277	8.90239e-05		0.652277	0.000103537		0.652277	3.0173e-05		0.652277	4.0229e-05		0.652277	5.24369e-05		0.652277	6.81965e-05
0.65517	8.62195e-05		0.65517	0.000100732		0.65517	3.00758e-05		0.65517	4.00363e-05		0.65517	5.21909e-05		0.65517	6.78011e-05
0.658064	8.35799e-05		0.658064	9.80246e-05		0.658064	2.99772e-05		0.658064	3.98448e-05		0.658064	5.19415e-05		0.658064	6.74031e-05
0.660958	8.1074e-05		0.660958	9.53799e-05		0.660958	2.98768e-05		0.660958	3.96545e-05		0.660958	5.16903e-05		0.660958	6.70008e-05
0.663852	7.867e-05		0.663852	9.27981e-05		0.663852	2.97743e-05		0.663852	3.94654e-05		0.663852	5.14394e-05		0.663852	6.65927e-05
0.666746	7.63529e-05		0.666746	9.02833e-05		0.666746	2.96694e-05		0.666746	3.92774e-05		0.666746	5.11888e-05		0.666746	6.61821e-05
0.66964	7.41193e-05		0.66964	8.78387e-05		0.66964	2.95618e-05		0.66964	3.90905e-05		0.66964	5.09381e-05		0.66964	6.57737e-05
0.672534	7.19596e-05		0.672534	8.54604e-05		0.672534	2.94513e-05		0.672534	3.89044e-05		0.672534	5.06872e-05		0.672534	6.53676e-05
0.675428	6.98759e-05		0.675428	8.31523e-05		0.675428	2.93376e-05		0.675428	3.87191e-05		0.675428	5.0436e-05		0.675428	6.49636e-05
0.678322	6.78738e-05		0.678322	8.09369e-05		0.678322	2.922e-05		0.678322	3.85347e-05		0.678322	5.01844e-05		0.678322	6.45618e-05
0.681215	6.59518e-05		0.681215	7.88295e-05		0.681215	2.91004e-05		0.681215	3.83512e-05		0.681215	4.99324e-05		0.681215	6.41619e-05
0.684109	6.41092e-05		0.684109	7.68286e-05		0.684109	2.8981e-05		0.684109	3.81684e-05		0.684109	4.968e-05		0.684109	6.37638e-05
0.687003	6.23411e-05		0.687003	7.49296e-05		0.687003	2.88619e-05		0.687003	3.79864e-05		0.687003	4.94269e-05		0.687003	6.33671e-05
0.689897	6.0643e-05		0.689897	7.31186e-05		0.689897	2.87432e-05		0.689897	3.78053e-05		0.689897	4.91733e-05		0.689897	6.29716e-05
0.692791	5.90171e-05		0.692791	7.13882e-05		0.692791	2.8625e-05		0.692791	3.76248e-05		0.692791	4.89191e-05		0.692791	6.25771e-05
0.695685	5.74675e-05		0.695685	6.97435e-05		0.695685	2.85072e-05		0.695685	3.7445e-05		0.695685	4.86641e-05		0.695685	6.21831e-05
0.698579	5.59875e-05		0.698579	6.81887e-05		0.698579	2.83899e-05		0.698579	3.72659e-05		0.698579	4.84082e-05		0.698579	6.17893e-05
0.701473	5.45693e-05		0.701473	6.67179e-05		0.701473	2.82733e-05		0.701473	3.70873e-05		0.701473	4.81515e-05		0.701473	6.13953e-05
0.704367	5.32176e-05		0.704367	6.53237e-05		0.704367	2.81576e-05		0.704367	3.69091e-05		0.704367	4.78939e-05		0.704367	6.10006e-05
0.70726	5.19397e-05		0.70726	6.4008e-05		0.70726	2.80429e-05		0.70726	3.67312e-05		0.70726	4.76356e-05		0.70726	6.06046e-05
0.710154	5.07463e-05		0.710154	6.27874e-05		0.710154	2.79297e-05		0.710154	3.65535e-05		0.710154	4.73765e-05		0.710154	6.02061e-05
0.713048	4.96435e-05		0.713048	6.16839e-05		0.713048	2.78186e-05		0.713048	3.63757e-05		0.713048	4.71203e-05		0.713048	5.98064e-05
0.715942	4.86439e-05		0.715942	6.0668e-05		0.715942	2.77104e-05		0.715942	3.61976e-05		0.715942	4.68713e-05		0.715942	5.94058e-05
0.715942	4.86439e-05		0.715942	6.0668e-05		0.715942	2.77104e-05		0.715942	3.61976e-05		0.715942	4.68713e-05		0.715942	5.94058e-05
0.718836	4.7718e-05		0.718836	5.96845e-05		0.718836	2.76038e-05		0.718836	3.60197e-05		0.718836	4.66267e-05		0.718836	5.90074e-05
0.72173	4.68223e-05		0.72173	5.87135e-05		0.72173	2.7497e-05		0.72173	3.58424e-05		0.72173	4.6382e-05		0.72173	5.86152e-05
0.724624	4.59543e-05		0.724624	5.77557e-05		0.724624	2.73899e-05		0.724624	3.56659e-05		0.724624	4.61369e-05		0.724624	5.82263e-05
0.727518	4.51115e-05		0.727518	5.68116e-05		0.727518	2.72826e-05		0.727518	3.54903e-05		0.727518	4.5891e-05		0.727518	5.78383e-05
0.730412	4.42909e-05		0.730412	5.58822e-05		0.730412	2.71748e-05		0.730412	3.5315e-05		0.730412	4.56439e-05		0.730412	5.74496e-05
0.733305	4.34883e-05		0.733305	5.49685e-05		0.733305	2.70665e-05		0.733305	3.51391e-05		0.733305	4.53951e-05		0.733305	5.7059e-05
0.736199	4.26997e-05		0.736199	5.40701e-05		0.736199	2.69574e-05		0.736199	3.49622e-05		0.736199	4.51442e-05		0.736199	5.66656e-05
0.739093	4.19224e-05		0.739093	5.31862e-05		0.739093	2.68474e-05		0.739093	3.47841e-05		0.739093	4.48905e-05		0.739093	5.62686e-05
0.741987	4.11533e-05		0.741987	5.23159e-05		0.741987	2.67363e-05		0.741987	3.46044e-05		0.741987	4.46334e-05		0.741987	5.58671e-05
0.744881	4.03889e-05		0.744881	5.14581e-05		0.744881	2.66238e-05		0.744881	3.44227e-05		0.744881	4.43725e-05		0.744881	5.54602e-05
0.747775	3.9636e-05		0.747775	5.06119e-05		0.747775	2.65096e-05		0.747775	3.42388e-05		0.747775	4.41069e-05		0.747775	5.50472e-05
0.750669	3.89028e-05		0.750669	4.97769e-05		0.750669	2.63934e-05		0.750669	3.4052e-05		0.750669	4.38358e-05		0.750669	5.46283e-05
0.753563	3.81869e-05		0.753563	4.89527e-05		0.753563	2.62746e-05		0.753563	3.38621e-05		0.753563	4.35585e-05		0.753563	5.42054e-05
0.756457	3.74853e-05		0.756457	4.81377e-05		0.756457	2.61531e-05		0.756457	3.36684e-05		0.756457	4.3274e-05		0.756457	5.37745e-05
0.75935	3.67951e-05		0.75935	4.73303e-05		0.75935	2.60288e-05		0.75935	3.34703e-05		0.75935	4.29813e-05		0.75935	5.3331e-05
0.762244	3.61138e-05		0.762244	4.65287e-05		0.762244	2.59016e-05		0.762244	3.32672e-05		0.762244	4.26794e-05		0.762244	5.28763e-05
0.765138	3.54392e-05		0.765138	4.5731e-05		0.765138	2.57708e-05		0.765138	3.30586e-05		0.765138	4.23674e-05		0.765138	5.24117e-05
0.768032	3.47726e-05		0.768032	4.49372e-05		0.768032	2.56357e-05		0.768032	3.28437e-05		0.768032	4.20448e-05		0.768032	5.19376e-05
0.770926	3.41165e-05		0.770926	4.41479e-05		0.770926	2.54958e-05		0.770926	3.2622e-05		0.770926	4.17105e-05		0.770926	5.1454e-05
0.77382	3.34706e-05		0.77382	4.33619e-05		0.77382	2.53502e-05		0.77382	3.23931e-05		0.77382	4.13636e-05		0.77382	5.09611e-05
0.776714	3.28351e-05		0.776714	4.25784e-05		0.776714	2.51985e-05		0.776714	3.21565e-05		0.776714	4.10034e-05		0.776714	5.0459e-05
0.779608	3.22106e-05		0.779608	4.17968e-05		0.779608	2.50398e-05		0.779608	3.19121e-05		0.779608	4.0629e-05		0.779608	4.99483e-05
0.782502	3.15989e-05		0.782502	4.10171e-05		0.782502	2.48734e-05		0.782502	3.16596e-05		0.782502	4.024e-05		0.782502	4.94301e-05
0.785396	3.10025e-05		0.785396	4.02401e-05		0.785396	2.46987e-05		0.785396	3.13987e-05		0.785396	3.98358e-05		0.785396	4.89057e-05
0.788289	3.04262e-05		0.788289	3.94719e-05		0.788289	2.45151e-05		0.788289	3.11284e-05		0.788289	3.94162e-05		0.788289	4.83769e-05
0.791183	2.98779e-05		0.791183	3.87161e-05		0.791183	2.43216e-05		0.791183	3.0848e-05		0.791183	3.89808e-05		0.791183	4.78412e-05
0.794077	2.93646e-05		0.794077	3.7972e-05		0.794077	2.41176e-05		0.794077	3.05579e-05		0.794077	3.85294e-05		0.794077	4.72949e-05
0.796971	2.8889e-05		0.796971	3.72416e-05		0.796971	2.39023e-05		0.796971	3.02582e-05		0.796971	3.8062e-05		0.796971	4.67392e-05
0.799865	2.8452e-05		0.799865	3.65259e-05		0.799865	2.36754e-05		0.799865	2.9949e-05		0.799865	3.75791e-05		0.799865	4.61751e-05
0.799865	2.8452e-05		0.799865	3.65259e-05		0.799865	2.36754e-05		0.799865	2.9949e-05		0.799865	3.75791e-05		0.799865	4.61751e-05
0.802759	2.80282e-05		0.802759	3.58114e-05		0.802759	2.34406e-05		0.802759	2.96291e-05		0.802759	3.70846e-05		0.802759	4.55962e-05
0.805653	2.75933e-05		0.805653	3.50921e-05		0.805653	2.3202e-05		0.805653	2.92969e-05		0.805653	3.65821e-05		0.805653	4.49958e-05
0.808547	2.71518e-05		0.808547	3.43757e-05		0.808547	2.29596e-05		0.808547	2.89523e-05		0.808547	3.60719e-05		0.808547	4.4374e-05
0.811441	2.67075e-05		0.811441	3.36618e-05		0.811441	2.2713e-05		0.811441	2.85949e-05		0.811441	3.55539e-05		0.811441	4.37306e-05
0.814334	2.62617e-05		0.814334	3.29489e-05		0.814334	2.24595e-05		0.814334	2.82242e-05		0.814334	3.50279e-05		0.814334	4.30702e-05
0.817228	2.5816e-05		0.817228	3.22351e-05		0.817228	2.2197e-05		0.817228	2.78396e-05		0.817228	3.44936e-05		0.817228	4.2398e-05
0.820122	2.53716e-05		0.820122	3.152e-05		0.820122	2.19258e-05		0.820122	2.74435e-05		0.820122	3.39502e-05		0.820122	4.17148e-05
0.823016	2.4928e-05		0.823016	3.08071e-05		0.823016	2.16462e-05		0.823016	2.70394e-05		0.823016	3.33973e-05		0.823016	4.10214e-05
0.82591	2.44842e-05		0.82591	3.00979e-05		0.82591	2.13586e-05		0.82591	2.66277e-05		0.82591	3.28387e-05		0.82591	4.03187e-05
0.828804	2.4041e-05		0.828804	2.93905e-05		0.828804	2.10638e-05		0.828804	2.62089e-05		0.828804	3.22791e-05		0.828804	3.96081e-05
0.831698	2.35987e-05		0.831698	2.86836e-05		0.831698	2.07626e-05		0.831698	2.57837e-05		0.831698	3.17195e-05		0.831698	3.8889e-05
0.834592	2.31562e-05		0.834592	2.79758e-05		0.834592	2.04561e-05		0.834592	2.53533e-05		0.834592	3.11622e-05		0.834592	3.81607e-05
0.837486	2.27122e-05		0.837486	2.72753e-05		0.837486	2.0146e-05		0.837486	2.4919e-05		0.837486	3.06112e-05		0.837486	3.7425e-05
0.840379	2.22672e-05		0.840379	2.6593e-05		0.840379	1.9833e-05		0.840379	2.44823e-05		0.840379	3.00735e-05		0.840379	3.66839e-05
0.843273	2.18221e-05		0.843273	2.59333e-05		0.843273	1.95147e-05		0.843273	2.40418e-05		0.843273	2.95378e-05		0.843273	3.594e-05
0.846167	2.13799e-05		0.846167	2.53015e-05		0.846167	1.91897e-05		0.846167	2.35962e-05		0.846167	2.89895e-05		0.846167	3.51954e-05
0.849061	2.09446e-05		0.849061	2.47028e-05		0.849061	1.88602e-05		0.849061	2.31477e-05		0.849061	2.84322e-05		0.849061	3.44523e-05
0.851955	2.0517e-05		0.851955	2.41343e-05		0.851955	1.85288e-05		0.851955	2.26989e-05		0.851955	2.78712e-05		0.851955	3.3714e-05
0.854849	2.00976e-05		0.854849	2.3591e-05		0.854849	1.81985e-05		0.854849	2.22531e-05		0.854849	2.7312e-05		0.854849	3.29845e-05
0.857743	1.96875e-05		0.857743	2.30728e-05		0.857743	1.78731e-05		0.857743	2.1814e-05		0.857743	2.67599e-05		0.857743	3.22689e-05
0.860637	1.92882e-05		0.860637	2.25842e-05		0.860637	1.75543e-05		0.860637	2.13843e-05		0.860637	2.62203e-05		0.860637	3.15732e-05
0.863531	1.89027e-05		0.863531	2.21347e-05		0.863531	1.72441e-05		0.863531	2.0968e-05		0.863531	2.57001e-05		0.863531	3.09053e-05
0.866424	1.85371e-05		0.866424	2.17363e-05		0.866424	1.69484e-05		0.866424	2.05729e-05		0.866424	2.52085e-05		0.866424	3.02762e-05
0.869318	1.82064e-05		0.869318	2.14034e-05		0.869318	1.6676e-05		0.869318	2.02101e-05		0.869318	2.47592e-05		0.869318	2.97028e-05
0.872212	1.79285e-05		0.872212	2.11311e-05		0.872212	1.64403e-05		0.872212	1.98972e-05		0.872212	2.43733e-05		0.872212	2.92113e-05
0.875106	1.77253e-05		0.875106	2.09302e-05		0.875106	1.62626e-05		0.875106	1.96626e-05		0.875106	2.40852e-05		0.875106	2.88452e-05
0.878	1.7647e-05		0.878	2.08451e-05		0.878	1.61917e-05		0.878	1.95693e-05		0.878	2.39707e-05		0.878	2.87005e-05

## Sheet: oh distribution 
SN 0			SN 0.2			SN 0.4			SN 0.6			SN 0.8			SN 1
Axial distance	oh mass fraction		Axial distance	oh mass fraction		Axial distance	oh mass fraction		Axial distance	oh mass fraction		Axial distance	oh mass fraction		Axial distance	oh mass fraction
0.00115113	4.88094e-05		0.00115113	4.72305e-05		0.00115113	4.66354e-05		0.00115113	3.85429e-05		0.00115113	3.89765e-05		0.00115113	4.01284e-05
0.00404502	4.63626e-05		0.00404502	4.50374e-05		0.00404502	4.62298e-05		0.00404502	4.08274e-05		0.00404502	4.18138e-05		0.00404502	4.25666e-05
0.00693891	4.316e-05		0.00693891	4.33872e-05		0.00693891	4.48825e-05		0.00693891	4.19755e-05		0.00693891	4.31761e-05		0.00693891	4.32582e-05
0.0098328	4.04314e-05		0.0098328	4.18889e-05		0.0098328	4.27234e-05		0.0098328	4.13533e-05		0.0098328	4.19681e-05		0.0098328	4.07817e-05
0.0127267	3.76897e-05		0.0127267	3.91239e-05		0.0127267	3.89113e-05		0.0127267	3.86002e-05		0.0127267	3.77226e-05		0.0127267	3.49358e-05
0.0156206	3.41239e-05		0.0156206	3.57754e-05		0.0156206	3.44037e-05		0.0156206	3.41457e-05		0.0156206	3.15403e-05		0.0156206	2.75029e-05
0.0185145	3.02634e-05		0.0185145	3.20337e-05		0.0185145	2.9686e-05		0.0185145	2.84852e-05		0.0185145	2.45491e-05		0.0185145	1.97561e-05
0.0214084	2.58781e-05		0.0214084	2.75913e-05		0.0214084	2.46866e-05		0.0214084	2.2459e-05		0.0214084	1.78383e-05		0.0214084	1.26408e-05
0.0243023	2.11196e-05		0.0243023	2.26078e-05		0.0243023	1.96176e-05		0.0243023	1.62777e-05		0.0243023	1.15936e-05		0.0243023	7.51338e-06
0.0271961	1.66056e-05		0.0271961	1.76649e-05		0.0271961	1.48894e-05		0.0271961	1.01303e-05		0.0271961	6.81315e-06		0.0271961	4.64018e-06
0.03009	1.25629e-05		0.03009	1.31457e-05		0.03009	1.06122e-05		0.03009	5.12939e-06		0.03009	4.15016e-06		0.03009	2.91614e-06
0.0329839	9.08598e-06		0.0329839	9.92174e-06		0.0329839	6.90138e-06		0.0329839	1.90734e-06		0.0329839	2.33925e-06		0.0329839	1.66795e-06
0.0358778	6.20525e-06		0.0358778	6.42536e-06		0.0358778	3.85674e-06		0.0358778	3.87712e-07		0.0358778	1.0642e-06		0.0358778	7.41123e-07
0.0387717	3.87279e-06		0.0387717	2.09613e-06		0.0387717	1.36018e-06		0.0387717	1.58314e-16		0.0387717	3.81148e-07		0.0387717	1.98205e-07
0.0416656	2.00909e-06		0.0416656	6.66002e-08		0.0416656	1.11074e-07		0.0416656	8.95822e-17		0.0416656	7.82262e-08		0.0416656	0
0.0445595	5.90564e-07		0.0445595	0		0.0445595	5.42914e-17		0.0445595	1.95156e-17		0.0445595	0		0.0445595	2.50307e-17
0.0474534	0		0.0474534	3.08456e-17		0.0474534	6.35614e-17		0.0474534	1.95156e-17		0.0474534	0		0.0474534	1.09299e-16
0.0503473	0		0.0503473	3.08456e-17		0.0503473	9.26993e-18		0.0503473	0		0.0503473	6.9577e-17		0.0503473	8.42688e-17
0.0532412	0		0.0532412	4.98733e-18		0.0532412	1.13841e-18		0.0532412	9.66295e-18		0.0532412	1.38251e-16		0.0532412	1.58636e-09
0.056135	9.92045e-18		0.056135	2.5533e-17		0.056135	1.75641e-17		0.056135	1.25158e-17		0.056135	6.8674e-17		0.056135	1.58636e-09
0.0590289	3.91939e-17		0.0590289	3.51824e-17		0.0590289	1.19967e-16		0.0590289	2.85281e-18		0.0590289	4.41406e-17		0.0590289	1.36689e-16
0.0619228	7.1991e-17		0.0619228	8.25078e-17		0.0619228	1.03541e-16		0.0619228	3.50876e-07		0.0619228	4.41406e-17		0.0619228	1.07344e-16
0.0648167	7.23163e-17		0.0648167	1.41922e-16		0.0648167	8.12757e-07		0.0648167	4.84626e-06		0.0648167	1.88767e-06		0.0648167	0
0.0677106	5.95769e-17		0.0677106	7.4051e-17		0.0677106	1.77804e-06		0.0677106	2.7826e-05		0.0677106	1.35737e-05		0.0677106	5.40746e-18
0.0706045	2.99782e-17		0.0706045	3.56703e-17		0.0706045	2.07154e-06		0.0706045	4.06342e-05		0.0706045	4.68527e-05		0.0706045	5.40746e-18
0.0734984	4.22297e-17		0.0734984	3.56703e-17		0.0734984	2.46707e-06		0.0734984	1.73035e-05		0.0734984	3.72519e-05		0.0734984	1.42798e-06
0.0763923	1.58402e-16		0.0763923	0		0.0763923	2.97732e-06		0.0763923	0		0.0763923	2.08523e-06		0.0763923	1.00897e-05
0.0792862	1.16172e-16		0.0792862	8.78746e-17		0.0792862	3.44207e-06		0.0792862	1.67182e-05		0.0792862	4.3443e-06		0.0792862	2.76654e-05
0.0821801	0		0.0821801	1.47397e-16		0.0821801	3.79357e-06		0.0821801	5.75302e-05		0.0821801	2.50165e-05		0.0821801	2.33184e-05
0.085074	3.69713e-17		0.085074	5.95227e-17		0.085074	4.17339e-06		0.085074	9.46969e-05		0.085074	6.39274e-05		0.085074	4.31472e-06
0.085074	3.69713e-17		0.085074	5.95227e-17		0.085074	4.17339e-06		0.085074	9.46969e-05		0.085074	6.39274e-05		0.085074	4.31472e-06
0.0879678	7.57857e-17		0.0879678	3.44234e-17		0.0879678	3.63587e-06		0.0879678	0.000123535		0.0879678	0.000100398		0.0879678	2.68048e-06
0.0908617	1.57755e-06		0.0908617	4.40186e-17		0.0908617	2.86922e-06		0.0908617	0.000147215		0.0908617	0.000131049		0.0908617	1.66026e-05
0.0937556	6.40128e-06		0.0937556	1.06511e-06		0.0937556	4.24826e-06		0.0937556	0.000139132		0.0937556	0.000134204		0.0937556	4.22884e-05
0.0966495	1.3697e-05		0.0966495	4.96189e-06		0.0966495	1.4429e-05		0.0966495	0.000107972		0.0966495	0.000103069		0.0966495	6.5684e-05
0.0995434	2.07292e-05		0.0995434	1.03869e-05		0.0995434	3.21273e-05		0.0995434	8.14213e-05		0.0995434	7.30416e-05		0.0995434	8.76037e-05
0.102437	2.54009e-05		0.102437	1.45035e-05		0.102437	2.52504e-05		0.102437	6.18648e-05		0.102437	5.22229e-05		0.102437	0.000114169
0.105331	2.7575e-05		0.105331	1.62685e-05		0.105331	4.74249e-06		0.105331	4.76531e-05		0.105331	3.82091e-05		0.105331	0.00011628
0.108225	2.54096e-05		0.108225	1.68056e-05		0.108225	9.1073e-18		0.108225	3.70478e-05		0.108225	2.84957e-05		0.108225	9.08169e-05
0.111119	1.97988e-05		0.111119	1.5719e-05		0.111119	5.11979e-06		0.111119	2.8994e-05		0.111119	2.15699e-05		0.111119	6.62856e-05
0.114013	1.39309e-05		0.114013	1.22596e-05		0.114013	2.36492e-05		0.114013	2.27894e-05		0.114013	1.65248e-05		0.114013	4.84022e-05
0.116907	9.5766e-06		0.116907	7.92605e-06		0.116907	5.54786e-05		0.116907	1.79595e-05		0.116907	1.28015e-05		0.116907	3.59387e-05
0.119801	7.90563e-06		0.119801	5.06993e-06		0.119801	8.76799e-05		0.119801	1.41814e-05		0.119801	1.00347e-05		0.119801	2.71478e-05
0.122695	7.69481e-06		0.122695	5.48141e-06		0.122695	0.000113832		0.122695	1.12193e-05		0.122695	7.94738e-06		0.122695	2.08458e-05
0.125588	9.45711e-06		0.125588	8.50802e-06		0.125588	0.00014403		0.125588	8.89862e-06		0.125588	6.34334e-06		0.125588	1.62703e-05
0.128482	1.28791e-05		0.128482	1.29228e-05		0.128482	0.000181328		0.128482	7.06669e-06		0.128482	5.11339e-06		0.128482	1.28974e-05
0.131376	1.50206e-05		0.131376	1.46693e-05		0.131376	0.00021616		0.131376	5.60573e-06		0.131376	4.17562e-06		0.131376	1.03745e-05
0.13427	1.24043e-05		0.13427	1.10956e-05		0.13427	0.000219692		0.13427	4.44859e-06		0.13427	3.4648e-06		0.13427	8.49173e-06
0.137164	7.51702e-06		0.137164	7.62746e-06		0.137164	0.0001895		0.137164	3.54024e-06		0.137164	2.92903e-06		0.137164	7.09381e-06
0.140058	5.8736e-06		0.140058	9.66198e-06		0.140058	0.000154008		0.140058	2.83536e-06		0.140058	2.52812e-06		0.140058	6.0672e-06
0.142952	9.63252e-06		0.142952	1.80761e-05		0.142952	0.000122736		0.142952	2.31822e-06		0.142952	2.23025e-06		0.142952	5.31142e-06
0.145846	1.827e-05		0.145846	2.95978e-05		0.145846	9.74896e-05		0.145846	1.93626e-06		0.145846	2.01043e-06		0.145846	4.75277e-06
0.14874	2.87169e-05		0.14874	4.12299e-05		0.14874	7.77236e-05		0.14874	1.63511e-06		0.14874	1.84947e-06		0.14874	4.34735e-06
0.151633	3.83934e-05		0.151633	5.11668e-05		0.151633	6.22115e-05		0.151633	1.40788e-06		0.151633	1.73267e-06		0.151633	4.056e-06
0.154527	4.73624e-05		0.154527	5.73982e-05		0.154527	4.99299e-05		0.154527	1.23877e-06		0.154527	1.64627e-06		0.154527	3.85086e-06
0.157421	5.53133e-05		0.157421	6.05657e-05		0.157421	4.01962e-05		0.157421	1.11481e-06		0.157421	1.57993e-06		0.157421	3.71015e-06
0.160315	6.02896e-05		0.160315	6.18941e-05		0.160315	3.24585e-05		0.160315	1.02566e-06		0.160315	1.52831e-06		0.160315	3.61738e-06
0.163209	6.30058e-05		0.163209	6.23636e-05		0.163209	2.62575e-05		0.163209	9.63065e-07		0.163209	1.48733e-06		0.163209	3.56051e-06
0.166103	6.46443e-05		0.166103	6.20386e-05		0.166103	2.12811e-05		0.166103	9.20064e-07		0.166103	1.4543e-06		0.166103	3.53057e-06
0.166103	6.46443e-05		0.166103	6.20386e-05		0.166103	2.12811e-05		0.166103	9.20064e-07		0.166103	1.4543e-06		0.166103	3.53057e-06
0.168997	6.56682e-05		0.168997	6.07084e-05		0.168997	1.72699e-05		0.168997	8.90269e-07		0.168997	1.42882e-06		0.168997	3.51509e-06
0.171891	6.59757e-05		0.171891	5.85263e-05		0.171891	1.40301e-05		0.171891	8.6917e-07		0.171891	1.41069e-06		0.171891	3.50378e-06
0.174785	6.5138e-05		0.174785	5.6062e-05		0.174785	1.13983e-05		0.174785	8.54439e-07		0.174785	1.39792e-06		0.174785	3.49272e-06
0.177678	6.36309e-05		0.177678	5.34195e-05		0.177678	9.22097e-06		0.177678	8.44283e-07		0.177678	1.3887e-06		0.177678	3.48063e-06
0.180572	6.20323e-05		0.180572	5.0467e-05		0.180572	7.43074e-06		0.180572	8.37193e-07		0.180572	1.38231e-06		0.180572	3.46858e-06
0.183466	6.01303e-05		0.183466	4.76706e-05		0.183466	5.93154e-06		0.183466	8.32048e-07		0.183466	1.3792e-06		0.183466	3.45604e-06
0.18636	5.80207e-05		0.18636	4.32497e-05		0.18636	4.83358e-06		0.18636	8.28407e-07		0.18636	1.37863e-06		0.18636	3.44192e-06
0.189254	5.61878e-05		0.189254	4.46023e-05		0.189254	4.0329e-06		0.189254	8.26171e-07		0.189254	1.37775e-06		0.189254	3.42566e-06
0.192148	5.41366e-05		0.192148	4.72331e-05		0.192148	3.32209e-06		0.192148	8.24922e-07		0.192148	1.37747e-06		0.192148	3.40749e-06
0.195042	5.20911e-05		0.195042	4.32463e-05		0.195042	2.75853e-06		0.195042	8.23837e-07		0.195042	1.3799e-06		0.195042	3.38778e-06
0.197936	4.94153e-05		0.197936	4.064e-05		0.197936	2.3169e-06		0.197936	8.22455e-07		0.197936	1.38416e-06		0.197936	3.36666e-06
0.20083	4.17731e-05		0.20083	3.95579e-05		0.20083	1.97526e-06		0.20083	8.20766e-07		0.20083	1.38952e-06		0.20083	3.34429e-06
0.203723	3.85976e-05		0.203723	3.86994e-05		0.203723	1.71468e-06		0.203723	8.19062e-07		0.203723	1.39589e-06		0.203723	3.32093e-06
0.206617	4.11528e-05		0.206617	3.84029e-05		0.206617	1.51802e-06		0.206617	8.18221e-07		0.206617	1.40335e-06		0.206617	3.29694e-06
0.209511	4.0957e-05		0.209511	3.82057e-05		0.209511	1.3717e-06		0.209511	8.18733e-07		0.209511	1.41194e-06		0.209511	3.27248e-06
0.212405	3.90528e-05		0.212405	4.07141e-05		0.212405	1.27364e-06		0.212405	8.19677e-07		0.212405	1.42172e-06		0.212405	3.2475e-06
0.215299	3.67099e-05		0.215299	4.29353e-05		0.215299	1.20791e-06		0.215299	8.19229e-07		0.215299	1.43286e-06		0.215299	3.22192e-06
0.215299	3.67099e-05		0.215299	4.29353e-05		0.215299	1.20791e-06		0.215299	8.19229e-07		0.215299	1.43286e-06		0.215299	3.22192e-06
0.218193	3.58821e-05		0.218193	4.2437e-05		0.218193	1.15681e-06		0.218193	8.169e-07		0.218193	1.44429e-06		0.218193	3.19581e-06
0.221087	3.52636e-05		0.221087	4.26313e-05		0.221087	1.1195e-06		0.221087	8.14048e-07		0.221087	1.45427e-06		0.221087	3.16933e-06
0.223981	3.51869e-05		0.223981	4.27282e-05		0.223981	1.09209e-06		0.223981	8.11671e-07		0.223981	1.46207e-06		0.223981	3.1425e-06
0.226875	3.58783e-05		0.226875	4.27354e-05		0.226875	1.0719e-06		0.226875	8.09748e-07		0.226875	1.46738e-06		0.226875	3.11535e-06
0.229768	3.68208e-05		0.229768	4.31265e-05		0.229768	1.05708e-06		0.229768	8.07919e-07		0.229768	1.47022e-06		0.229768	3.08786e-06
0.232662	3.8472e-05		0.232662	4.36075e-05		0.232662	1.04635e-06		0.232662	8.05855e-07		0.232662	1.471e-06		0.232662	3.06002e-06
0.235556	3.96782e-05		0.235556	4.33238e-05		0.235556	1.03884e-06		0.235556	8.03366e-07		0.235556	1.47016e-06		0.235556	3.03179e-06
0.23845	4.14451e-05		0.23845	4.3114e-05		0.23845	1.0337e-06		0.23845	8.00429e-07		0.23845	1.46794e-06		0.23845	3.0031e-06
0.241344	4.38053e-05		0.241344	4.44581e-05		0.241344	1.03033e-06		0.241344	7.97148e-07		0.241344	1.46453e-06		0.241344	2.97388e-06
0.244238	4.50461e-05		0.244238	4.68521e-05		0.244238	1.02775e-06		0.244238	7.93605e-07		0.244238	1.46012e-06		0.244238	2.9443e-06
0.247132	4.63149e-05		0.247132	4.81727e-05		0.247132	1.02492e-06		0.247132	7.89819e-07		0.247132	1.45486e-06		0.247132	2.91508e-06
0.250026	4.63879e-05		0.250026	4.70821e-05		0.250026	1.02236e-06		0.250026	7.85783e-07		0.250026	1.44888e-06		0.250026	2.88668e-06
0.25292	4.52774e-05		0.25292	4.5144e-05		0.25292	1.02163e-06		0.25292	7.81671e-07		0.25292	1.44229e-06		0.25292	2.85909e-06
0.255814	4.49804e-05		0.255814	4.41616e-05		0.255814	1.02376e-06		0.255814	7.77644e-07		0.255814	1.43519e-06		0.255814	2.83231e-06
0.258707	4.56657e-05		0.258707	4.50651e-05		0.258707	1.02659e-06		0.258707	7.73671e-07		0.258707	1.42768e-06		0.258707	2.8063e-06
0.261601	4.6458e-05		0.261601	4.8241e-05		0.261601	1.0278e-06		0.261601	7.69755e-07		0.261601	1.41984e-06		0.261601	2.78102e-06
0.264495	4.6163e-05		0.264495	5.3444e-05		0.264495	1.02752e-06		0.264495	7.6607e-07		0.264495	1.41174e-06		0.264495	2.75645e-06
0.267389	4.38537e-05		0.267389	6.10353e-05		0.267389	1.02603e-06		0.267389	7.62776e-07		0.267389	1.40344e-06		0.267389	2.73254e-06
0.270283	4.03195e-05		0.270283	6.90305e-05		0.270283	1.02365e-06		0.270283	7.59827e-07		0.270283	1.39499e-06		0.270283	2.70928e-06
0.273177	3.80518e-05		0.273177	7.5044e-05		0.273177	1.02234e-06		0.273177	7.57122e-07		0.273177	1.38642e-06		0.273177	2.68662e-06
0.276071	3.64546e-05		0.276071	7.9005e-05		0.276071	1.02486e-06		0.276071	7.54589e-07		0.276071	1.37776e-06		0.276071	2.66453e-06
0.278965	3.49307e-05		0.278965	8.05958e-05		0.278965	1.0314e-06		0.278965	7.52186e-07		0.278965	1.36903e-06		0.278965	2.64296e-06
0.281859	3.52548e-05		0.281859	8.06256e-05		0.281859	1.03703e-06		0.281859	7.49886e-07		0.281859	1.36023e-06		0.281859	2.62185e-06
0.284752	3.75728e-05		0.284752	7.98156e-05		0.284752	1.03436e-06		0.284752	7.47673e-07		0.284752	1.35141e-06		0.284752	2.60118e-06
0.287646	4.11083e-05		0.287646	7.83892e-05		0.287646	1.0256e-06		0.287646	7.45531e-07		0.287646	1.34255e-06		0.287646	2.58112e-06
0.29054	4.46184e-05		0.29054	7.66341e-05		0.29054	1.0187e-06		0.29054	7.43446e-07		0.29054	1.33375e-06		0.29054	2.56194e-06
0.293434	4.94828e-05		0.293434	7.49199e-05		0.293434	1.01569e-06		0.293434	7.41407e-07		0.293434	1.32513e-06		0.293434	2.54388e-06
0.296328	5.57129e-05		0.296328	7.3281e-05		0.296328	1.01534e-06		0.296328	7.39402e-07		0.296328	1.31671e-06		0.296328	2.52709e-06
0.299222	6.10945e-05		0.299222	7.23629e-05		0.299222	1.01592e-06		0.299222	7.3743e-07		0.299222	1.30846e-06		0.299222	2.51154e-06
0.302116	6.58416e-05		0.302116	7.26171e-05		0.302116	1.01647e-06		0.302116	7.35483e-07		0.302116	1.30033e-06		0.302116	2.49721e-06
0.30501	6.97779e-05		0.30501	7.42579e-05		0.30501	1.01674e-06		0.30501	7.33549e-07		0.30501	1.29231e-06		0.30501	2.48408e-06
0.307904	7.28678e-05		0.307904	7.47528e-05		0.307904	1.01684e-06		0.307904	7.31608e-07		0.307904	1.28436e-06		0.307904	2.47208e-06
0.310797	7.4818e-05		0.310797	7.40915e-05		0.310797	1.01705e-06		0.310797	7.29634e-07		0.310797	1.27645e-06		0.310797	2.46114e-06
0.313691	7.47477e-05		0.313691	7.54141e-05		0.313691	1.01747e-06		0.313691	7.27569e-07		0.313691	1.26854e-06		0.313691	2.4509e-06
0.313691	7.47477e-05		0.313691	7.54141e-05		0.313691	1.01747e-06		0.313691	7.27569e-07		0.313691	1.26854e-06		0.313691	2.4509e-06
0.316585	7.40168e-05		0.316585	7.72564e-05		0.316585	1.01823e-06		0.316585	7.25251e-07		0.316585	1.26067e-06		0.316585	2.4399e-06
0.319479	7.37984e-05		0.319479	7.82405e-05		0.319479	1.01949e-06		0.319479	7.22561e-07		0.319479	1.25287e-06		0.319479	2.42687e-06
0.322373	7.34753e-05		0.322373	7.87007e-05		0.322373	1.02121e-06		0.322373	7.19494e-07		0.322373	1.24513e-06		0.322373	2.41182e-06
0.325267	7.30413e-05		0.325267	7.77573e-05		0.325267	1.02329e-06		0.325267	7.16408e-07		0.325267	1.23739e-06		0.325267	2.3949e-06
0.328161	7.31339e-05		0.328161	7.77148e-05		0.328161	1.02559e-06		0.328161	7.13665e-07		0.328161	1.22962e-06		0.328161	2.37625e-06
0.331055	7.39631e-05		0.331055	7.92408e-05		0.331055	1.02805e-06		0.331055	7.11256e-07		0.331055	1.22174e-06		0.331055	2.35646e-06
0.333949	7.49604e-05		0.333949	8.22018e-05		0.333949	1.03101e-06		0.333949	7.09159e-07		0.333949	1.21372e-06		0.333949	2.33607e-06
0.336842	7.67609e-05		0.336842	8.54468e-05		0.336842	1.0351e-06		0.336842	7.0734e-07		0.336842	1.20547e-06		0.336842	2.31519e-06
0.339736	7.93029e-05		0.339736	8.93194e-05		0.339736	1.04047e-06		0.339736	7.05768e-07		0.339736	1.19692e-06		0.339736	2.29395e-06
0.34263	8.19086e-05		0.34263	9.52458e-05		0.34263	1.0467e-06		0.34263	7.04416e-07		0.34263	1.18834e-06		0.34263	2.27244e-06
0.345524	8.3758e-05		0.345524	0.000100621		0.345524	1.05351e-06		0.345524	7.03259e-07		0.345524	1.18005e-06		0.345524	2.25072e-06
0.348418	8.52454e-05		0.348418	0.000104593		0.348418	1.06072e-06		0.348418	7.02274e-07		0.348418	1.17202e-06		0.348418	2.22887e-06
0.351312	8.63935e-05		0.351312	0.000105872		0.351312	1.06821e-06		0.351312	7.01438e-07		0.351312	1.16426e-06		0.351312	2.20691e-06
0.354206	8.4698e-05		0.354206	0.000108111		0.354206	1.07589e-06		0.354206	7.00732e-07		0.354206	1.15674e-06		0.354206	2.18487e-06
0.3571	8.13906e-05		0.3571	0.000112556		0.3571	1.0837e-06		0.3571	7.00133e-07		0.3571	1.14946e-06		0.3571	2.16277e-06
0.359994	8.01527e-05		0.359994	0.000118134		0.359994	1.09157e-06		0.359994	6.99622e-07		0.359994	1.14241e-06		0.359994	2.1406e-06
0.362887	8.04502e-05		0.362887	0.000125129		0.362887	1.09944e-06		0.362887	6.99177e-07		0.362887	1.13557e-06		0.362887	2.11835e-06
0.365781	7.97115e-05		0.365781	0.000132454		0.365781	1.10724e-06		0.365781	6.98773e-07		0.365781	1.12894e-06		0.365781	2.09598e-06
0.368675	7.89408e-05		0.368675	0.000138473		0.368675	1.11494e-06		0.368675	6.98381e-07		0.368675	1.12251e-06		0.368675	2.07409e-06
0.371569	8.11698e-05		0.371569	0.000141473		0.371569	1.12245e-06		0.371569	6.97965e-07		0.371569	1.11627e-06		0.371569	2.05323e-06
0.374463	8.77529e-05		0.374463	0.000144505		0.374463	1.12968e-06		0.374463	6.97484e-07		0.374463	1.11023e-06		0.374463	2.03341e-06
0.377357	9.25806e-05		0.377357	0.000153905		0.377357	1.13652e-06		0.377357	6.96891e-07		0.377357	1.10435e-06		0.377357	2.01466e-06
0.380251	9.47194e-05		0.380251	0.000168182		0.380251	1.14288e-06		0.380251	6.96133e-07		0.380251	1.09861e-06		0.380251	1.99699e-06
0.383145	9.7047e-05		0.383145	0.000181114		0.383145	1.14867e-06		0.383145	6.95087e-07		0.383145	1.09296e-06		0.383145	1.98042e-06
0.386039	9.71897e-05		0.386039	0.000191193		0.386039	1.15454e-06		0.386039	6.9385e-07		0.386039	1.08731e-06		0.386039	1.96494e-06
0.388932	0.000100344		0.388932	0.000198034		0.388932	1.16109e-06		0.388932	6.92835e-07		0.388932	1.08178e-06		0.388932	1.95055e-06
0.391826	0.000110501		0.391826	0.000203291		0.391826	1.16819e-06		0.391826	6.92272e-07		0.391826	1.07653e-06		0.391826	1.93723e-06
0.39472	0.000124826		0.39472	0.000211672		0.39472	1.17581e-06		0.39472	6.92134e-07		0.39472	1.07165e-06		0.39472	1.92494e-06
0.397614	0.000138982		0.397614	0.000227655		0.397614	1.18388e-06		0.397614	6.92363e-07		0.397614	1.06712e-06		0.397614	1.91366e-06
0.400508	0.000148285		0.400508	0.000252687		0.400508	1.19214e-06		0.400508	6.92892e-07		0.400508	1.06291e-06		0.400508	1.90344e-06
0.403402	0.000153472		0.403402	0.000284412		0.403402	1.20029e-06		0.403402	6.93705e-07		0.403402	1.05897e-06		0.403402	1.89439e-06
0.403402	0.000153472		0.403402	0.000284412		0.403402	1.20029e-06		0.403402	6.93705e-07		0.403402	1.05897e-06		0.403402	1.89439e-06
0.406296	0.000161012		0.406296	0.000315439		0.406296	1.20852e-06		0.406296	6.94641e-07		0.406296	1.05509e-06		0.406296	1.88579e-06
0.40919	0.000177557		0.40919	0.000343746		0.40919	1.21706e-06		0.40919	6.9555e-07		0.40919	1.05105e-06		0.40919	1.87685e-06
0.412084	0.000199432		0.412084	0.000367302		0.412084	1.22569e-06		0.412084	6.96444e-07		0.412084	1.04685e-06		0.412084	1.86752e-06
0.414977	0.000230214		0.414977	0.000387167		0.414977	1.23431e-06		0.414977	6.97296e-07		0.414977	1.0425e-06		0.414977	1.85779e-06
0.417871	0.000269527		0.417871	0.000408629		0.417871	1.24295e-06		0.417871	6.98072e-07		0.417871	1.03799e-06		0.417871	1.84766e-06
0.420765	0.000305462		0.420765	0.000427637		0.420765	1.25165e-06		0.420765	6.98748e-07		0.420765	1.03333e-06		0.420765	1.83712e-06
0.423659	0.00033503		0.423659	0.000450987		0.423659	1.26033e-06		0.423659	6.99309e-07		0.423659	1.0285e-06		0.423659	1.8262e-06
0.426553	0.000357053		0.426553	0.000481203		0.426553	1.26896e-06		0.426553	6.99747e-07		0.426553	1.02347e-06		0.426553	1.81494e-06
0.429447	0.000377007		0.429447	0.000514657		0.429447	1.27752e-06		0.429447	7.00065e-07		0.429447	1.01825e-06		0.429447	1.80337e-06
0.432341	0.000396292		0.432341	0.000552392		0.432341	1.2859e-06		0.432341	7.0027e-07		0.432341	1.01283e-06		0.432341	1.79155e-06
0.435235	0.000413068		0.435235	0.000591807		0.435235	1.29407e-06		0.435235	7.00368e-07		0.435235	1.00732e-06		0.435235	1.77952e-06
0.438129	0.000430705		0.438129	0.000627105		0.438129	1.30223e-06		0.438129	7.00366e-07		0.438129	1.00187e-06		0.438129	1.76734e-06
0.441023	0.000451548		0.441023	0.000650561		0.441023	1.31066e-06		0.441023	7.00264e-07		0.441023	9.9647e-07		0.441023	1.75507e-06
0.443916	0.000476188		0.443916	0.000662368		0.443916	1.31905e-06		0.443916	7.0006e-07		0.443916	9.91138e-07		0.443916	1.74277e-06
0.44681	0.000501245		0.44681	0.000664471		0.44681	1.32699e-06		0.44681	6.99877e-07		0.44681	9.8587e-07		0.44681	1.73046e-06
0.449704	0.000522995		0.449704	0.000657196		0.449704	1.33451e-06		0.449704	6.99833e-07		0.449704	9.80664e-07		0.449704	1.71817e-06
0.452598	0.000543605		0.452598	0.000643419		0.452598	1.34163e-06		0.452598	6.99924e-07		0.452598	9.75514e-07		0.452598	1.70593e-06
0.455492	0.000561366		0.455492	0.00062515		0.455492	1.34824e-06		0.455492	7.00145e-07		0.455492	9.70411e-07		0.455492	1.69376e-06
0.458386	0.000572085		0.458386	0.000602492		0.458386	1.35415e-06		0.458386	7.00495e-07		0.458386	9.65348e-07		0.458386	1.68165e-06
0.46128	0.000575512		0.46128	0.000576746		0.46128	1.35988e-06		0.46128	7.00971e-07		0.46128	9.60312e-07		0.46128	1.66962e-06
0.464174	0.00057036		0.464174	0.000550304		0.464174	1.36616e-06		0.464174	7.0157e-07		0.464174	9.55287e-07		0.464174	1.65767e-06
0.467068	0.000557983		0.467068	0.00052357		0.467068	1.37316e-06		0.467068	7.02282e-07		0.467068	9.50243e-07		0.467068	1.6458e-06
0.469961	0.000540291		0.469961	0.000495703		0.469961	1.38093e-06		0.469961	7.03088e-07		0.469961	9.45142e-07		0.469961	1.63398e-06
0.472855	0.000518463		0.472855	0.000467607		0.472855	1.38949e-06		0.472855	7.03965e-07		0.472855	9.39939e-07		0.472855	1.62222e-06
0.475749	0.000495598		0.475749	0.000439158		0.475749	1.39881e-06		0.475749	7.04896e-07		0.475749	9.34606e-07		0.475749	1.61067e-06
0.478643	0.000471001		0.478643	0.000410496		0.478643	1.40879e-06		0.478643	7.05876e-07		0.478643	9.29385e-07		0.478643	1.59949e-06
0.481537	0.0004437		0.481537	0.000382647		0.481537	1.41935e-06		0.481537	7.069e-07		0.481537	9.24531e-07		0.481537	1.58867e-06
0.484431	0.000416102		0.484431	0.000355947		0.484431	1.43046e-06		0.484431	7.07956e-07		0.484431	9.20045e-07		0.484431	1.57819e-06
0.487325	0.000389033		0.487325	0.000330504		0.487325	1.4421e-06		0.487325	7.09021e-07		0.487325	9.15911e-07		0.487325	1.56802e-06
0.490219	0.000362807		0.490219	0.000306349		0.490219	1.45424e-06		0.490219	7.10059e-07		0.490219	9.12095e-07		0.490219	1.55816e-06
0.493113	0.000338356		0.493113	0.00028352		0.493113	1.46686e-06		0.493113	7.11011e-07		0.493113	9.08552e-07		0.493113	1.5486e-06
0.496006	0.0003158		0.496006	0.000262093		0.496006	1.4799e-06		0.496006	7.11797e-07		0.496006	9.05256e-07		0.496006	1.53932e-06
0.4989	0.000293917		0.4989	0.000242221		0.4989	1.49331e-06		0.4989	7.12329e-07		0.4989	9.02241e-07		0.4989	1.53027e-06
0.501794	0.00027216		0.501794	0.000223806		0.501794	1.50699e-06		0.501794	7.12811e-07		0.501794	8.99534e-07		0.501794	1.52138e-06
0.504688	0.000251114		0.504688	0.000206499		0.504688	1.52085e-06		0.504688	7.13501e-07		0.504688	8.97109e-07		0.504688	1.51256e-06
0.507582	0.000231262		0.507582	0.000190298		0.507582	1.53477e-06		0.507582	7.14401e-07		0.507582	8.94941e-07		0.507582	1.5037e-06
0.510476	0.000212825		0.510476	0.000175454		0.510476	1.5486e-06		0.510476	7.15478e-07		0.510476	8.92976e-07		0.510476	1.49505e-06
0.51337	0.000195698		0.51337	0.000161803		0.51337	1.56217e-06		0.51337	7.16705e-07		0.51337	8.91063e-07		0.51337	1.48689e-06
0.516264	0.000179818		0.516264	0.000149123		0.516264	1.57527e-06		0.516264	7.18032e-07		0.516264	8.89049e-07		0.516264	1.47919e-06
0.519158	0.000165128		0.519158	0.00013737		0.519158	1.58758e-06		0.519158	7.1932e-07		0.519158	8.87068e-07		0.519158	1.4719e-06
0.522051	0.000151557		0.522051	0.000126435		0.522051	1.59863e-06		0.522051	7.2035e-07		0.522051	8.85725e-07		0.522051	1.46494e-06
0.524945	0.000139218		0.524945	0.000116427		0.524945	1.60779e-06		0.524945	7.2101e-07		0.524945	8.85176e-07		0.524945	1.45813e-06
0.524945	0.000139218		0.524945	0.000116427		0.524945	1.60779e-06		0.524945	7.2101e-07		0.524945	8.85176e-07		0.524945	1.45813e-06
0.527839	0.000127984		0.527839	0.000107362		0.527839	1.61592e-06		0.527839	7.21711e-07		0.527839	8.84862e-07		0.527839	1.45134e-06
0.530733	0.000117649		0.530733	9.90735e-05		0.530733	1.6242e-06		0.530733	7.22917e-07		0.530733	8.84509e-07		0.530733	1.44473e-06
0.533627	0.000108183		0.533627	9.14589e-05		0.533627	1.63259e-06		0.533627	7.2447e-07		0.533627	8.84182e-07		0.533627	1.4386e-06
0.536521	9.95239e-05		0.536521	8.44351e-05		0.536521	1.64121e-06		0.536521	7.26039e-07		0.536521	8.83943e-07		0.536521	1.43288e-06
0.539415	9.15261e-05		0.539415	7.79569e-05		0.539415	1.6502e-06		0.539415	7.27527e-07		0.539415	8.83787e-07		0.539415	1.42717e-06
0.542309	8.40851e-05		0.542309	7.1987e-05		0.542309	1.65953e-06		0.542309	7.28971e-07		0.542309	8.83674e-07		0.542309	1.42136e-06
0.545203	7.72468e-05		0.545203	6.64632e-05		0.545203	1.66919e-06		0.545203	7.30431e-07		0.545203	8.83565e-07		0.545203	1.41553e-06
0.548096	7.09756e-05		0.548096	6.13727e-05		0.548096	1.6791e-06		0.548096	7.31941e-07		0.548096	8.83417e-07		0.548096	1.40985e-06
0.55099	6.52503e-05		0.55099	5.67308e-05		0.55099	1.68919e-06		0.55099	7.33463e-07		0.55099	8.8318e-07		0.55099	1.40446e-06
0.553884	6.01463e-05		0.553884	5.24784e-05		0.553884	1.69931e-06		0.553884	7.34925e-07		0.553884	8.82789e-07		0.553884	1.3993e-06
0.556778	5.5548e-05		0.556778	4.85229e-05		0.556778	1.71022e-06		0.556778	7.36495e-07		0.556778	8.82107e-07		0.556778	1.39437e-06
0.559672	5.13064e-05		0.559672	4.48579e-05		0.559672	1.72265e-06		0.559672	7.38373e-07		0.559672	8.80992e-07		0.559672	1.38963e-06
0.562566	4.73822e-05		0.562566	4.15063e-05		0.562566	1.73639e-06		0.562566	7.40557e-07		0.562566	8.79369e-07		0.562566	1.38505e-06
0.56546	4.37745e-05		0.56546	3.84661e-05		0.56546	1.75125e-06		0.56546	7.43036e-07		0.56546	8.77583e-07		0.56546	1.38057e-06
0.568354	4.04026e-05		0.568354	3.56688e-05		0.568354	1.76705e-06		0.568354	7.45751e-07		0.568354	8.76017e-07		0.568354	1.37608e-06
0.571248	3.7234e-05		0.571248	3.30632e-05		0.571248	1.78365e-06		0.571248	7.4861e-07		0.571248	8.74669e-07		0.571248	1.37156e-06
0.574142	3.43432e-05		0.574142	3.06893e-05		0.574142	1.80094e-06		0.574142	7.51564e-07		0.574142	8.73524e-07		0.574142	1.36698e-06
0.577035	3.17379e-05		0.577035	2.85371e-05		0.577035	1.81878e-06		0.577035	7.5461e-07		0.577035	8.72562e-07		0.577035	1.36234e-06
0.579929	2.9342e-05		0.579929	2.65864e-05		0.579929	1.83706e-06		0.579929	7.57745e-07		0.579929	8.71757e-07		0.579929	1.35761e-06
0.582823	2.71152e-05		0.582823	2.47787e-05		0.582823	1.85566e-06		0.582823	7.60956e-07		0.582823	8.71079e-07		0.582823	1.35275e-06
0.585717	2.50861e-05		0.585717	2.30826e-05		0.585717	1.87446e-06		0.585717	7.64226e-07		0.585717	8.70499e-07		0.585717	1.34794e-06
0.588611	2.32398e-05		0.588611	2.15092e-05		0.588611	1.89332e-06		0.588611	7.67531e-07		0.588611	8.69986e-07		0.588611	1.34337e-06
0.591505	2.15563e-05		0.591505	2.00466e-05		0.591505	1.9121e-06		0.591505	7.70844e-07		0.591505	8.6951e-07		0.591505	1.33903e-06
0.594399	2.00124e-05		0.594399	1.86874e-05		0.594399	1.93066e-06		0.594399	7.74133e-07		0.594399	8.69039e-07		0.594399	1.33491e-06
0.597293	1.8593e-05		0.597293	1.74291e-05		0.597293	1.94886e-06		0.597293	7.77354e-07		0.597293	8.68536e-07		0.597293	1.33099e-06
0.600186	1.72924e-05		0.600186	1.62536e-05		0.600186	1.96655e-06		0.600186	7.80462e-07		0.600186	8.67957e-07		0.600186	1.32726e-06
0.60308	1.61021e-05		0.60308	1.51547e-05		0.60308	1.98357e-06		0.60308	7.83405e-07		0.60308	8.6724e-07		0.60308	1.32369e-06
0.605974	1.50146e-05		0.605974	1.4142e-05		0.605974	1.99973e-06		0.605974	7.86127e-07		0.605974	8.66315e-07		0.605974	1.32025e-06
0.608868	1.40206e-05		0.608868	1.32104e-05		0.608868	2.01567e-06		0.608868	7.88565e-07		0.608868	8.65118e-07		0.608868	1.31691e-06
0.611762	1.3102e-05		0.611762	1.23533e-05		0.611762	2.03217e-06		0.611762	7.90923e-07		0.611762	8.63889e-07		0.611762	1.31362e-06
0.614656	1.22343e-05		0.614656	1.15647e-05		0.614656	2.04923e-06		0.614656	7.93445e-07		0.614656	8.62916e-07		0.614656	1.31032e-06
0.61755	1.14142e-05		0.61755	1.08395e-05		0.61755	2.06686e-06		0.61755	7.96135e-07		0.61755	8.62213e-07		0.61755	1.30698e-06
0.620444	1.06496e-05		0.620444	1.01733e-05		0.620444	2.08503e-06		0.620444	7.98987e-07		0.620444	8.61785e-07		0.620444	1.30358e-06
0.623338	9.93875e-06		0.623338	9.5568e-06		0.623338	2.10372e-06		0.623338	8.01986e-07		0.623338	8.61634e-07		0.623338	1.30013e-06
0.626231	9.28002e-06		0.626231	8.9826e-06		0.626231	2.1229e-06		0.626231	8.0511e-07		0.626231	8.61764e-07		0.626231	1.2968e-06
0.629125	8.67035e-06		0.629125	8.44956e-06		0.629125	2.14253e-06		0.629125	8.08339e-07		0.629125	8.62177e-07		0.629125	1.29381e-06
0.632019	8.10696e-06		0.632019	7.95545e-06		0.632019	2.16259e-06		0.632019	8.11666e-07		0.632019	8.6288e-07		0.632019	1.29118e-06
0.634913	7.58829e-06		0.634913	7.49756e-06		0.634913	2.18302e-06		0.634913	8.15091e-07		0.634913	8.63893e-07		0.634913	1.28894e-06
0.637807	7.11046e-06		0.637807	7.07407e-06		0.637807	2.20379e-06		0.637807	8.18618e-07		0.637807	8.65249e-07		0.637807	1.28708e-06
0.640701	6.67241e-06		0.640701	6.68472e-06		0.640701	2.22479e-06		0.640701	8.22252e-07		0.640701	8.67013e-07		0.640701	1.28565e-06
0.643595	6.27847e-06		0.643595	6.33082e-06		0.643595	2.24583e-06		0.643595	8.25987e-07		0.643595	8.69291e-07		0.643595	1.28469e-06
0.643595	6.27847e-06		0.643595	6.33082e-06		0.643595	2.24583e-06		0.643595	8.25987e-07		0.643595	8.69291e-07		0.643595	1.28469e-06
0.646489	5.92386e-06		0.646489	6.00786e-06		0.646489	2.26675e-06		0.646489	8.29732e-07		0.646489	8.71829e-07		0.646489	1.28398e-06
0.649383	5.59742e-06		0.649383	5.70757e-06		0.649383	2.28763e-06		0.649383	8.33419e-07		0.649383	8.74301e-07		0.649383	1.28327e-06
0.652277	5.29385e-06		0.652277	5.42719e-06		0.652277	2.30851e-06		0.652277	8.37042e-07		0.652277	8.76648e-07		0.652277	1.28246e-06
0.65517	5.01207e-06		0.65517	5.16679e-06		0.65517	2.3293e-06		0.65517	8.40566e-07		0.65517	8.78771e-07		0.65517	1.28145e-06
0.658064	4.74856e-06		0.658064	4.92248e-06		0.658064	2.34993e-06		0.658064	8.43956e-07		0.658064	8.8057e-07		0.658064	1.28013e-06
0.660958	4.50052e-06		0.660958	4.69073e-06		0.660958	2.37034e-06		0.660958	8.47177e-07		0.660958	8.82187e-07		0.660958	1.2784e-06
0.663852	4.26548e-06		0.663852	4.47231e-06		0.663852	2.39045e-06		0.663852	8.50194e-07		0.663852	8.83822e-07		0.663852	1.27617e-06
0.666746	4.04108e-06		0.666746	4.26579e-06		0.666746	2.41012e-06		0.666746	8.52948e-07		0.666746	8.85464e-07		0.666746	1.27368e-06
0.66964	3.82945e-06		0.66964	4.0699e-06		0.66964	2.42918e-06		0.66964	8.55605e-07		0.66964	8.87097e-07		0.66964	1.27124e-06
0.672534	3.63234e-06		0.672534	3.88609e-06		0.672534	2.44745e-06		0.672534	8.58368e-07		0.672534	8.88708e-07		0.672534	1.26886e-06
0.675428	3.44836e-06		0.675428	3.71544e-06		0.675428	2.46468e-06		0.675428	8.61245e-07		0.675428	8.90287e-07		0.675428	1.26653e-06
0.678322	3.27685e-06		0.678322	3.55782e-06		0.678322	2.4806e-06		0.678322	8.64229e-07		0.678322	8.9182e-07		0.678322	1.26424e-06
0.681215	3.11826e-06		0.681215	3.4124e-06		0.681215	2.49599e-06		0.681215	8.67308e-07		0.681215	8.93295e-07		0.681215	1.26196e-06
0.684109	2.97121e-06		0.684109	3.27815e-06		0.684109	2.51183e-06		0.684109	8.70468e-07		0.684109	8.94696e-07		0.684109	1.25967e-06
0.687003	2.83304e-06		0.687003	3.15391e-06		0.687003	2.52816e-06		0.687003	8.73689e-07		0.687003	8.96003e-07		0.687003	1.25734e-06
0.689897	2.70238e-06		0.689897	3.03877e-06		0.689897	2.54493e-06		0.689897	8.76949e-07		0.689897	8.97194e-07		0.689897	1.25495e-06
0.692791	2.57885e-06		0.692791	2.93223e-06		0.692791	2.56206e-06		0.692791	8.8022e-07		0.692791	8.9824e-07		0.692791	1.25246e-06
0.695685	2.45937e-06		0.695685	2.83409e-06		0.695685	2.57944e-06		0.695685	8.8347e-07		0.695685	8.99107e-07		0.695685	1.24982e-06
0.698579	2.34907e-06		0.698579	2.74428e-06		0.698579	2.59694e-06		0.698579	8.86656e-07		0.698579	8.99752e-07		0.698579	1.24699e-06
0.701473	2.24651e-06		0.701473	2.66258e-06		0.701473	2.61438e-06		0.701473	8.89724e-07		0.701473	9.00124e-07		0.701473	1.2439e-06
0.704367	2.15046e-06		0.704367	2.58868e-06		0.704367	2.6315e-06		0.704367	8.92604e-07		0.704367	9.00162e-07		0.704367	1.24049e-06
0.70726	2.07111e-06		0.70726	2.522e-06		0.70726	2.64798e-06		0.70726	8.95198e-07		0.70726	8.99784e-07		0.70726	1.23667e-06
0.710154	2.00959e-06		0.710154	2.4614e-06		0.710154	2.66335e-06		0.710154	8.97371e-07		0.710154	8.98881e-07		0.710154	1.23232e-06
0.713048	1.95588e-06		0.713048	2.40642e-06		0.713048	2.67695e-06		0.713048	8.98924e-07		0.713048	8.9764e-07		0.713048	1.22763e-06
0.715942	1.90186e-06		0.715942	2.35635e-06		0.715942	2.68759e-06		0.715942	8.99522e-07		0.715942	8.96238e-07		0.715942	1.22274e-06
0.715942	1.90186e-06		0.715942	2.35635e-06		0.715942	2.68759e-06		0.715942	8.99522e-07		0.715942	8.96238e-07		0.715942	1.22274e-06
0.718836	1.85059e-06		0.718836	2.30709e-06		0.718836	2.69649e-06		0.718836	8.9957e-07		0.718836	8.94771e-07		0.718836	1.21783e-06
0.72173	1.80278e-06		0.72173	2.25688e-06		0.72173	2.70547e-06		0.72173	8.99653e-07		0.72173	8.93353e-07		0.72173	1.2131e-06
0.724624	1.75737e-06		0.724624	2.20762e-06		0.724624	2.71438e-06		0.724624	8.99749e-07		0.724624	8.91932e-07		0.724624	1.20845e-06
0.727518	1.71504e-06		0.727518	2.16249e-06		0.727518	2.72326e-06		0.727518	8.9989e-07		0.727518	8.905e-07		0.727518	1.20382e-06
0.730412	1.67568e-06		0.730412	2.1274e-06		0.730412	2.73212e-06		0.730412	9.00031e-07		0.730412	8.89038e-07		0.730412	1.19917e-06
0.733305	1.63875e-06		0.733305	2.10002e-06		0.733305	2.74095e-06		0.733305	9.00108e-07		0.733305	8.87526e-07		0.733305	1.19447e-06
0.736199	1.60384e-06		0.736199	2.07641e-06		0.736199	2.74972e-06		0.736199	9.00124e-07		0.736199	8.8594e-07		0.736199	1.18969e-06
0.739093	1.57095e-06		0.739093	2.05366e-06		0.739093	2.75842e-06		0.739093	9.00082e-07		0.739093	8.84256e-07		0.739093	1.1848e-06
0.741987	1.5402e-06		0.741987	2.02963e-06		0.741987	2.767e-06		0.741987	8.9996e-07		0.741987	8.82448e-07		0.741987	1.17977e-06
0.744881	1.51168e-06		0.744881	2.00702e-06		0.744881	2.77542e-06		0.744881	8.99717e-07		0.744881	8.80489e-07		0.744881	1.17456e-06
0.747775	1.48529e-06		0.747775	1.98625e-06		0.747775	2.78363e-06		0.747775	8.99314e-07		0.747775	8.78356e-07		0.747775	1.16915e-06
0.750669	1.46087e-06		0.750669	1.96716e-06		0.750669	2.79156e-06		0.750669	8.98716e-07		0.750669	8.76024e-07		0.750669	1.16353e-06
0.753563	1.4384e-06		0.753563	1.9495e-06		0.753563	2.79911e-06		0.753563	8.97888e-07		0.753563	8.73465e-07		0.753563	1.15775e-06
0.756457	1.41794e-06		0.756457	1.93328e-06		0.756457	2.80612e-06		0.756457	8.96793e-07		0.756457	8.7065e-07		0.756457	1.15165e-06
0.75935	1.39954e-06		0.75935	1.91859e-06		0.75935	2.81218e-06		0.75935	8.95391e-07		0.75935	8.67547e-07		0.75935	1.14504e-06
0.762244	1.38321e-06		0.762244	1.90548e-06		0.762244	2.81691e-06		0.762244	8.93643e-07		0.762244	8.64124e-07		0.762244	1.13794e-06
0.765138	1.36884e-06		0.765138	1.89395e-06		0.765138	2.8201e-06		0.765138	8.91506e-07		0.765138	8.60289e-07		0.765138	1.13036e-06
0.768032	1.35621e-06		0.768032	1.88385e-06		0.768032	2.82154e-06		0.768032	8.8894e-07		0.768032	8.55939e-07		0.768032	1.12228e-06
0.770926	1.34511e-06		0.770926	1.87493e-06		0.770926	2.82102e-06		0.770926	8.85907e-07		0.770926	8.51034e-07		0.770926	1.1137e-06
0.77382	1.33551e-06		0.77382	1.86702e-06		0.77382	2.81832e-06		0.77382	8.82364e-07		0.77382	8.45536e-07		0.77382	1.10459e-06
0.776714	1.32732e-06		0.776714	1.85991e-06		0.776714	2.81322e-06		0.776714	8.78252e-07		0.776714	8.39395e-07		0.776714	1.09495e-06
0.779608	1.32041e-06		0.779608	1.85339e-06		0.779608	2.80561e-06		0.779608	8.73515e-07		0.779608	8.32561e-07		0.779608	1.08476e-06
0.782502	1.31467e-06		0.782502	1.84726e-06		0.782502	2.79536e-06		0.782502	8.68104e-07		0.782502	8.2499e-07		0.782502	1.07402e-06
0.785396	1.30995e-06		0.785396	1.84127e-06		0.785396	2.78218e-06		0.785396	8.61923e-07		0.785396	8.16652e-07		0.785396	1.06274e-06
0.788289	1.30609e-06		0.788289	1.83515e-06		0.788289	2.76567e-06		0.788289	8.54748e-07		0.788289	8.07525e-07		0.788289	1.05097e-06
0.791183	1.30291e-06		0.791183	1.8286e-06		0.791183	2.74548e-06		0.791183	8.46396e-07		0.791183	7.97582e-07		0.791183	1.03851e-06
0.794077	1.30017e-06		0.794077	1.82125e-06		0.794077	2.7212e-06		0.794077	8.368e-07		0.794077	7.86798e-07		0.794077	1.02512e-06
0.796971	1.29756e-06		0.796971	1.81269e-06		0.796971	2.69206e-06		0.796971	8.25897e-07		0.796971	7.75154e-07		0.796971	1.01076e-06
0.799865	1.29473e-06		0.799865	1.80248e-06		0.799865	2.6573e-06		0.799865	8.13716e-07		0.799865	7.62595e-07		0.799865	9.95454e-07
0.799865	1.29473e-06		0.799865	1.80248e-06		0.799865	2.6573e-06		0.799865	8.13716e-07		0.799865	7.62595e-07		0.799865	9.95454e-07
0.802759	1.29088e-06		0.802759	1.78989e-06		0.802759	2.61777e-06		0.802759	8.00442e-07		0.802759	7.49105e-07		0.802759	9.79103e-07
0.805653	1.28534e-06		0.805653	1.77459e-06		0.805653	2.57574e-06		0.805653	7.86308e-07		0.805653	7.34759e-07		0.805653	9.61674e-07
0.808547	1.27803e-06		0.808547	1.75659e-06		0.808547	2.53186e-06		0.808547	7.71327e-07		0.808547	7.19612e-07		0.808547	9.43245e-07
0.811441	1.26884e-06		0.811441	1.73572e-06		0.811441	2.48522e-06		0.811441	7.55331e-07		0.811441	7.03698e-07		0.811441	9.23877e-07
0.814334	1.25761e-06		0.814334	1.71186e-06		0.814334	2.43436e-06		0.814334	7.38286e-07		0.814334	6.87051e-07		0.814334	9.03552e-07
0.817228	1.24418e-06		0.817228	1.68502e-06		0.817228	2.3763e-06		0.817228	7.20312e-07		0.817228	6.69715e-07		0.817228	8.82244e-07
0.820122	1.22845e-06		0.820122	1.65527e-06		0.820122	2.30766e-06		0.820122	7.01273e-07		0.820122	6.51741e-07		0.820122	8.6002e-07
0.823016	1.21043e-06		0.823016	1.6227e-06		0.823016	2.23596e-06		0.823016	6.80858e-07		0.823016	6.33196e-07		0.823016	8.36969e-07
0.82591	1.19021e-06		0.82591	1.58738e-06		0.82591	2.17394e-06		0.82591	6.58903e-07		0.82591	6.14066e-07		0.82591	8.13205e-07
0.828804	1.16796e-06		0.828804	1.54944e-06		0.828804	2.11362e-06		0.828804	6.35846e-07		0.828804	5.94376e-07		0.828804	7.88884e-07
0.831698	1.1438e-06		0.831698	1.50912e-06		0.831698	2.04143e-06		0.831698	6.13222e-07		0.831698	5.74323e-07		0.831698	7.63896e-07
0.834592	1.11785e-06		0.834592	1.46668e-06		0.834592	1.95601e-06		0.834592	5.92553e-07		0.834592	5.54103e-07		0.834592	7.38106e-07
0.837486	1.0903e-06		0.837486	1.42247e-06		0.837486	1.85048e-06		0.837486	5.73085e-07		0.837486	5.33823e-07		0.837486	7.11683e-07
0.840379	1.06113e-06		0.840379	1.37687e-06		0.840379	1.73987e-06		0.840379	5.51561e-07		0.840379	5.13577e-07		0.840379	6.84851e-07
0.843273	1.03048e-06		0.843273	1.33026e-06		0.843273	1.66113e-06		0.843273	5.27177e-07		0.843273	4.93088e-07		0.843273	6.57863e-07
0.846167	9.98862e-07		0.846167	1.28304e-06		0.846167	1.60757e-06		0.846167	5.02436e-07		0.846167	4.72133e-07		0.846167	6.30801e-07
0.849061	9.66599e-07		0.849061	1.23558e-06		0.849061	1.5516e-06		0.849061	4.78843e-07		0.849061	4.50982e-07		0.849061	6.03618e-07
0.851955	9.33941e-07		0.851955	1.1882e-06		0.851955	1.49318e-06		0.851955	4.56022e-07		0.851955	4.29952e-07		0.851955	5.76498e-07
0.854849	9.01104e-07		0.854849	1.14119e-06		0.854849	1.43702e-06		0.854849	4.33679e-07		0.854849	4.0926e-07		0.854849	5.49813e-07
0.857743	8.68278e-07		0.857743	1.09478e-06		0.857743	1.3749e-06		0.857743	4.12309e-07		0.857743	3.89064e-07		0.857743	5.24005e-07
0.860637	8.35634e-07		0.860637	1.04915e-06		0.860637	1.30405e-06		0.860637	3.92169e-07		0.860637	3.69746e-07		0.860637	4.99164e-07
0.863531	8.03355e-07		0.863531	1.0045e-06		0.863531	1.23364e-06		0.863531	3.73615e-07		0.863531	3.51958e-07		0.863531	4.75389e-07
0.866424	7.71729e-07		0.866424	9.61199e-07		0.866424	1.1707e-06		0.866424	3.57823e-07		0.866424	3.35774e-07		0.866424	4.53226e-07
0.869318	7.41426e-07		0.869318	9.20139e-07		0.869318	1.11707e-06		0.869318	3.43395e-07		0.869318	3.20712e-07		0.869318	4.33244e-07
0.872212	7.14471e-07		0.872212	8.83732e-07		0.872212	1.07255e-06		0.872212	3.18865e-07		0.872212	3.06018e-07		0.872212	4.16108e-07
0.875106	6.98566e-07		0.875106	8.58369e-07		0.875106	1.03725e-06		0.875106	3.0455e-07		0.875106	2.99415e-07		0.875106	4.02859e-07
0.878	6.94948e-07		0.878	8.49659e-07		0.878	1.02222e-06		0.878	3.07374e-07		0.878	3.00257e-07		0.878	3.97427e-07

## Sheet: Radiation heat flux
SN 0			SN 0.2			SN 0.4			SN 0.6			SN 0.8			SN 1
Axial distance	Radiation heat flux W/m2		Axial distance	Radiation heat flux W/m2		Axial distance	Radiation heat flux W/m2		Axial distance	Radiation heat flux W/m2		Axial distance	Radiation heat flux W/m2		Axial distance	Radiation heat flux W/m2
0.00115113	9206.94		0.00115113	9591.51		0.00115113	17840.8		0.00115113	24139.8		0.00115113	28945.6		0.00115113	34430.8
0.00404502	9249.58		0.00404502	9641.28		0.00404502	17957.5		0.00404502	24165.1		0.00404502	29288.1		0.00404502	34728.2
0.00693891	9295.08		0.00693891	9695.78		0.00693891	18088.1		0.00693891	24204.8		0.00693891	29608.9		0.00693891	34952.2
0.0098328	9359.21		0.0098328	9767.34		0.0098328	18257.5		0.0098328	24296.9		0.0098328	29922.2		0.0098328	35150.1
0.0127267	9450.97		0.0127267	9861.34		0.0127267	18480.2		0.0127267	24481.3		0.0127267	30240.3		0.0127267	35345.7
0.0156206	9564.52		0.0156206	9973.65		0.0156206	18746.1		0.0156206	24759.4		0.0156206	30550.8		0.0156206	35536.2
0.0185145	9688.49		0.0185145	10093.7		0.0185145	19042.6		0.0185145	25113.6		0.0185145	30854.8		0.0185145	35777.9
0.0214084	9815.99		0.0214084	10214.4		0.0214084	19366.6		0.0214084	25533.7		0.0214084	31166.3		0.0214084	36124.6
0.0243023	9941.23		0.0243023	10327.9		0.0243023	19708.7		0.0243023	25995		0.0243023	31470.6		0.0243023	36582
0.0271961	10057.9		0.0271961	10430.2		0.0271961	20054.8		0.0271961	26465		0.0271961	31731.3		0.0271961	37136.1
0.03009	10161.8		0.03009	10520.8		0.03009	20391		0.03009	26913.9		0.03009	31965.1		0.03009	37754.4
0.0329839	10252.2		0.0329839	10602.3		0.0329839	20707.2		0.0329839	27316.6		0.0329839	32228.3		0.0329839	38388.8
0.0358778	10331.5		0.0358778	10677.5		0.0358778	20999.2		0.0358778	27655.3		0.0358778	32554.4		0.0358778	38986.5
0.0387717	10403.4		0.0387717	10749.5		0.0387717	21266.7		0.0387717	27921.6		0.0387717	32955.7		0.0387717	39502.5
0.0416656	10469.3		0.0416656	10821.9		0.0416656	21510		0.0416656	28122.1		0.0416656	33417.7		0.0416656	39915
0.0445595	10530.5		0.0445595	10896		0.0445595	21729		0.0445595	28280		0.0445595	33902.1		0.0445595	40234
0.0474534	10587.9		0.0474534	10971.5		0.0474534	21926.7		0.0474534	28412.1		0.0474534	34358.8		0.0474534	40492
0.0503473	10642.7		0.0503473	11047.4		0.0503473	22108.2		0.0503473	28536.3		0.0503473	34746.6		0.0503473	40663.1
0.0532412	10696.5		0.0532412	11124		0.0532412	22276.3		0.0532412	28706.6		0.0532412	35052		0.0532412	40737.1
0.056135	10751.8		0.056135	11201.1		0.056135	22430		0.056135	28968.7		0.056135	35297.8		0.056135	40811.1
0.0590289	10810.3		0.0590289	11278.2		0.0590289	22567.7		0.0590289	29329.9		0.0590289	35489.6		0.0590289	40940.8
0.0619228	10872.6		0.0619228	11355		0.0619228	22693.9		0.0619228	29771		0.0619228	35617.4		0.0619228	41112.2
0.0648167	10938.6		0.0648167	11431.2		0.0648167	22816.3		0.0648167	30247.9		0.0648167	35763.3		0.0648167	41317.3
0.0677106	11008.7		0.0677106	11506.8		0.0677106	22941.9		0.0677106	30709.1		0.0677106	36000.2		0.0677106	41545.3
0.0706045	11082.9		0.0706045	11582		0.0706045	23080.9		0.0706045	31125		0.0706045	36310.2		0.0706045	41736.6
0.0734984	11160		0.0734984	11657.3		0.0734984	23242.5		0.0734984	31513.1		0.0734984	36670.5		0.0734984	41880.1
0.0763923	11239.2		0.0763923	11733		0.0763923	23433		0.0763923	31923.6		0.0763923	37024.9		0.0763923	42041.8
0.0792862	11320.6		0.0792862	11809.4		0.0792862	23655.1		0.0792862	32366		0.0792862	37334.2		0.0792862	42247.1
0.0821801	11404.7		0.0821801	11886.5		0.0821801	23910.4		0.0821801	32888.5		0.0821801	37664.9		0.0821801	42495.6
0.085074	11491.6		0.085074	11964.3		0.085074	24197.5		0.085074	33522		0.085074	38075.4		0.085074	42795.9
0.085074	11491.6		0.085074	11964.3		0.085074	24197.5		0.085074	33522		0.085074	38075.4		0.085074	42795.9
0.0879678	11580.8		0.0879678	12042.7		0.0879678	24511.5		0.0879678	34080.8		0.0879678	38502.7		0.0879678	43164.3
0.0908617	11671		0.0908617	12122		0.0908617	24845.4		0.0908617	34343.2		0.0908617	38850.1		0.0908617	43616.2
0.0937556	11761.1		0.0937556	12202.6		0.0937556	25189		0.0937556	34381.6		0.0937556	39090.5		0.0937556	44150.4
0.0966495	11850.2		0.0966495	12284.6		0.0966495	25530.9		0.0966495	34349.8		0.0966495	39246.6		0.0966495	44734
0.0995434	11937.8		0.0995434	12368.4		0.0995434	25865.7		0.0995434	34267.8		0.0995434	39322.8		0.0995434	45286.4
0.102437	12023.4		0.102437	12454.2		0.102437	26204.6		0.102437	34163		0.102437	39308.4		0.102437	45700.8
0.105331	12106.8		0.105331	12541.8		0.105331	26577.6		0.105331	34058.9		0.105331	39250.5		0.105331	45953
0.108225	12188		0.108225	12630.8		0.108225	27022		0.108225	33949.3		0.108225	39209.5		0.108225	46073.4
0.111119	12266.9		0.111119	12720.5		0.111119	27555.9		0.111119	33827.4		0.111119	39189.5		0.111119	46065.6
0.114013	12343.3		0.114013	12810.1		0.114013	28154.3		0.114013	33723.7		0.114013	39174.8		0.114013	45985.1
0.116907	12417.3		0.116907	12898.9		0.116907	28815.3		0.116907	33660.3		0.116907	39156.6		0.116907	45902.8
0.119801	12488.9		0.119801	12986.2		0.119801	29552.4		0.119801	33623.8		0.119801	39132.7		0.119801	45832.9
0.122695	12558.2		0.122695	13071.3		0.122695	30314		0.122695	33599.3		0.122695	39103.2		0.122695	45770.4
0.125588	12625.1		0.125588	13154.1		0.125588	31014.6		0.125588	33581.3		0.125588	39068.2		0.125588	45710.4
0.128482	12689.9		0.128482	13234.3		0.128482	31596.1		0.128482	33565.7		0.128482	39029		0.128482	45650.7
0.131376	12752.5		0.131376	13312		0.131376	31983.5		0.131376	33549.2		0.131376	38984.2		0.131376	45589.3
0.13427	12812.9		0.13427	13387.3		0.13427	32160.3		0.13427	33530.1		0.13427	38933.8		0.13427	45526.5
0.137164	12871.4		0.137164	13460.4		0.137164	32199.5		0.137164	33504.9		0.137164	38881.5		0.137164	45459
0.140058	12927.9		0.140058	13531.4		0.140058	32110.6		0.140058	33470.2		0.140058	38826.3		0.140058	45387
0.142952	12982.8		0.142952	13600.6		0.142952	31930.1		0.142952	33427.6		0.142952	38770.5		0.142952	45312.3
0.145846	13036		0.145846	13668		0.145846	31718		0.145846	33377.7		0.145846	38718.4		0.145846	45233.8
0.14874	13087.7		0.14874	13734		0.14874	31477.6		0.14874	33319.7		0.14874	38670.1		0.14874	45156.8
0.151633	13137.9		0.151633	13798.9		0.151633	31215.7		0.151633	33259.4		0.151633	38623.2		0.151633	45083.4
0.154527	13186.6		0.154527	13862.7		0.154527	30939.7		0.154527	33200.1		0.154527	38575.2		0.154527	45011.7
0.157421	13233.9		0.157421	13925.9		0.157421	30648.7		0.157421	33142.1		0.157421	38526.5		0.157421	44939.4
0.160315	13279.8		0.160315	13988.7		0.160315	30361.1		0.160315	33085.9		0.160315	38477.4		0.160315	44865.1
0.163209	13324.6		0.163209	14051.4		0.163209	30103.7		0.163209	33034.4		0.163209	38428		0.163209	44788.4
0.166103	13368.4		0.166103	14114.4		0.166103	29882.6		0.166103	32987.3		0.166103	38378.7		0.166103	44709.3
0.166103	13368.4		0.166103	14114.4		0.166103	29882.6		0.166103	32987.3		0.166103	38378.7		0.166103	44709.3
0.168997	13411.5		0.168997	14178.1		0.168997	29696.5		0.168997	32942.9		0.168997	38329.6		0.168997	44628
0.171891	13454.2		0.171891	14242.8		0.171891	29541.9		0.171891	32902.3		0.171891	38281.1		0.171891	44544.8
0.174785	13496.6		0.174785	14308.6		0.174785	29411.1		0.174785	32865.3		0.174785	38233.2		0.174785	44460.2
0.177678	13538.9		0.177678	14375.8		0.177678	29296.1		0.177678	32831.7		0.177678	38186.4		0.177678	44374.9
0.180572	13581.4		0.180572	14444.5		0.180572	29194.6		0.180572	32801.3		0.180572	38140.5		0.180572	44289.2
0.183466	13624.1		0.183466	14514.9		0.183466	29106.3		0.183466	32773.9		0.183466	38095.6		0.183466	44203.5
0.18636	13667.1		0.18636	14587		0.18636	29028.7		0.18636	32749.2		0.18636	38051.4		0.18636	44118.2
0.189254	13710.6		0.189254	14660.7		0.189254	28960.7		0.189254	32726.7		0.189254	38007.8		0.189254	44033.4
0.192148	13754.5		0.192148	14736		0.192148	28901.9		0.192148	32706.1		0.192148	37964.6		0.192148	43949.5
0.195042	13799		0.195042	14812.9		0.195042	28849.7		0.195042	32687.5		0.195042	37921.9		0.195042	43867.1
0.197936	13844.4		0.197936	14891.2		0.197936	28801.5		0.197936	32670.5		0.197936	37879.5		0.197936	43786.8
0.20083	13890.8		0.20083	14971.1		0.20083	28755.3		0.20083	32654.7		0.20083	37837.9		0.20083	43708.4
0.203723	13938.3		0.203723	15052.4		0.203723	28708.7		0.203723	32639.5		0.203723	37796.3		0.203723	43630.6
0.206617	13987.3		0.206617	15135.1		0.206617	28660		0.206617	32624.5		0.206617	37753.1		0.206617	43552.4
0.209511	14037.6		0.209511	15219.3		0.209511	28608.5		0.209511	32609.5		0.209511	37707.9		0.209511	43473.8
0.212405	14089.4		0.212405	15305.1		0.212405	28554.6		0.212405	32594.3		0.212405	37661		0.212405	43395.1
0.215299	14142.8		0.215299	15392.5		0.215299	28498.9		0.215299	32577.6		0.215299	37613.3		0.215299	43316.9
0.215299	14142.8		0.215299	15392.5		0.215299	28498.9		0.215299	32577.6		0.215299	37613.3		0.215299	43316.9
0.218193	14197.9		0.218193	15481.1		0.218193	28443.2		0.218193	32558.3		0.218193	37565.8		0.218193	43239.7
0.221087	14254.8		0.221087	15571.2		0.221087	28390.8		0.221087	32536.1		0.221087	37518.5		0.221087	43163.9
0.223981	14313.8		0.223981	15663		0.223981	28342.3		0.223981	32511.5		0.223981	37471.1		0.223981	43089
0.226875	14374.9		0.226875	15756.9		0.226875	28298.3		0.226875	32485.1		0.226875	37422.6		0.226875	43014.3
0.229768	14437.8		0.229768	15852.5		0.229768	28260.8		0.229768	32457.2		0.229768	37371.9		0.229768	42939.3
0.232662	14502.6		0.232662	15949.7		0.232662	28230.6		0.232662	32428.1		0.232662	37319.5		0.232662	42863.8
0.235556	14569.6		0.235556	16048.8		0.235556	28207.9		0.235556	32397.8		0.235556	37266.3		0.235556	42787.7
0.23845	14638.8		0.23845	16149.7		0.23845	28192.1		0.23845	32366.3		0.23845	37212.1		0.23845	42710.8
0.241344	14710.3		0.241344	16252.4		0.241344	28182		0.241344	32333.6		0.241344	37156.7		0.241344	42632.9
0.244238	14784		0.244238	16356.9		0.244238	28176.3		0.244238	32299.4		0.244238	37100		0.244238	42553.8
0.247132	14859.8		0.247132	16463.5		0.247132	28174.1		0.247132	32263.8		0.247132	37042.2		0.247132	42473.6
0.250026	14937.8		0.250026	16572.1		0.250026	28174.2		0.250026	32226.7		0.250026	36983.2		0.250026	42392.1
0.25292	15017.9		0.25292	16682.7		0.25292	28175.7		0.25292	32188.1		0.25292	36923.2		0.25292	42309.2
0.255814	15100.1		0.255814	16795.4		0.255814	28177.8		0.255814	32147.6		0.255814	36862.2		0.255814	42225
0.258707	15184.4		0.258707	16910.3		0.258707	28179.5		0.258707	32105.7		0.258707	36800.3		0.258707	42139.5
0.261601	15270.7		0.261601	17027.5		0.261601	28180.2		0.261601	32062.9		0.261601	36737.5		0.261601	42052.7
0.264495	15359.1		0.264495	17146.9		0.264495	28179.1		0.264495	32019.2		0.264495	36673.9		0.264495	41964.7
0.267389	15449.6		0.267389	17268.7		0.267389	28175.6		0.267389	31974.5		0.267389	36609.3		0.267389	41875.4
0.270283	15542		0.270283	17393		0.270283	28169.7		0.270283	31928.8		0.270283	36543.8		0.270283	41784.9
0.273177	15636.4		0.273177	17519.6		0.273177	28161.3		0.273177	31882.3		0.273177	36477.4		0.273177	41693.1
0.276071	15732.7		0.276071	17648.8		0.276071	28150.1		0.276071	31834.9		0.276071	36410.1		0.276071	41600.1
0.278965	15830.8		0.278965	17780.6		0.278965	28135.8		0.278965	31786.7		0.278965	36341.7		0.278965	41505.8
0.281859	15930.9		0.281859	17915.2		0.281859	28118.1		0.281859	31737.9		0.281859	36272.3		0.281859	41410.1
0.284752	16032.8		0.284752	18052.6		0.284752	28096.9		0.284752	31688.3		0.284752	36201.9		0.284752	41313
0.287646	16136.5		0.287646	18192.6		0.287646	28072.6		0.287646	31638		0.287646	36130.2		0.287646	41214.4
0.29054	16242.1		0.29054	18335.7		0.29054	28045.5		0.29054	31587.1		0.29054	36057.4		0.29054	41114.1
0.293434	16349.5		0.293434	18481.7		0.293434	28016		0.293434	31535.4		0.293434	35983.3		0.293434	41012.1
0.296328	16458.7		0.296328	18630.7		0.296328	27984.6		0.296328	31483		0.296328	35908		0.296328	40908.3
0.299222	16569.7		0.299222	18782.8		0.299222	27951.3		0.299222	31429.9		0.299222	35831.5		0.299222	40802.7
0.302116	16682.5		0.302116	18937.8		0.302116	27916.7		0.302116	31376.2		0.302116	35753.7		0.302116	40695.2
0.30501	16797		0.30501	19095.8		0.30501	27880.9		0.30501	31321.6		0.30501	35674.7		0.30501	40585.9
0.307904	16913.3		0.307904	19256.7		0.307904	27844.2		0.307904	31266.2		0.307904	35594.3		0.307904	40474.9
0.310797	17031.2		0.310797	19420.7		0.310797	27806.4		0.310797	31209.8		0.310797	35512.6		0.310797	40362
0.313691	17151.1		0.313691	19587.7		0.313691	27767.6		0.313691	31152.4		0.313691	35429.3		0.313691	40247.4
0.313691	17151.1		0.313691	19587.7		0.313691	27767.6		0.313691	31152.4		0.313691	35429.3		0.313691	40247.4
0.316585	17272.8		0.316585	19757.9		0.316585	27727.8		0.316585	31093.9		0.316585	35344.4		0.316585	40131
0.319479	17396.4		0.319479	19931.2		0.319479	27687.3		0.319479	31034.3		0.319479	35258.1		0.319479	40012.9
0.322373	17521.9		0.322373	20107.6		0.322373	27645.9		0.322373	30973.6		0.322373	35170.4		0.322373	39893.5
0.325267	17649.5		0.325267	20287.3		0.325267	27603.6		0.325267	30911.8		0.325267	35081.3		0.325267	39772.8
0.328161	17779.2		0.328161	20470.4		0.328161	27560.7		0.328161	30848.9		0.328161	34990.9		0.328161	39650.8
0.331055	17911.2		0.331055	20656.8		0.331055	27517.4		0.331055	30784.8		0.331055	34899.3		0.331055	39527.1
0.333949	18045.5		0.333949	20846.6		0.333949	27473.6		0.333949	30719.5		0.333949	34806.4		0.333949	39402.2
0.336842	18182.3		0.336842	21040		0.336842	27429.2		0.336842	30652.9		0.336842	34712.3		0.336842	39276.8
0.339736	18321.4		0.339736	21236.8		0.339736	27384.2		0.339736	30585.2		0.339736	34617.2		0.339736	39150.8
0.34263	18463		0.34263	21437.2		0.34263	27338.8		0.34263	30516.3		0.34263	34521.3		0.34263	39024.2
0.345524	18607.1		0.345524	21641.2		0.345524	27293		0.345524	30446.3		0.345524	34424.5		0.345524	38897
0.348418	18753.6		0.348418	21848.7		0.348418	27246.8		0.348418	30375.3		0.348418	34326.7		0.348418	38769.4
0.351312	18902.8		0.351312	22059.8		0.351312	27200.2		0.351312	30303.3		0.351312	34228.1		0.351312	38641.4
0.354206	19054.9		0.354206	22274.2		0.354206	27153.2		0.354206	30230.3		0.354206	34129		0.354206	38513.1
0.3571	19209.9		0.3571	22491.6		0.3571	27105.9		0.3571	30156.4		0.3571	34029.6		0.3571	38384.7
0.359994	19367.9		0.359994	22712		0.359994	27058.2		0.359994	30081.7		0.359994	33929.8		0.359994	38256.3
0.362887	19528.9		0.362887	22935.3		0.362887	27010.2		0.362887	30006.4		0.362887	33829.6		0.362887	38128
0.365781	19693.1		0.365781	23161.5		0.365781	26961.8		0.365781	29930.4		0.365781	33729.3		0.365781	37999.9
0.368675	19860.6		0.368675	23390.4		0.368675	26912.9		0.368675	29854		0.368675	33628.8		0.368675	37872.1
0.371569	20031.4		0.371569	23621.9		0.371569	26863.6		0.371569	29776.9		0.371569	33528.1		0.371569	37744.5
0.374463	20205		0.374463	23855.6		0.374463	26813.5		0.374463	29699		0.374463	33427.2		0.374463	37616.8
0.377357	20381.5		0.377357	24091.5		0.377357	26762.9		0.377357	29620.6		0.377357	33326.3		0.377357	37489.4
0.380251	20560.9		0.380251	24328.7		0.380251	26711.7		0.380251	29542		0.380251	33225.7		0.380251	37362.4
0.383145	20743.1		0.383145	24566.7		0.383145	26659.9		0.383145	29463.3		0.383145	33125.2		0.383145	37235.8
0.386039	20928.2		0.386039	24804.7		0.386039	26607.5		0.386039	29384.3		0.386039	33025		0.386039	37109.5
0.388932	21116.1		0.388932	25042.2		0.388932	26554.3		0.388932	29305.1		0.388932	32925		0.388932	36983.6
0.391826	21306.8		0.391826	25278.6		0.391826	26500.4		0.391826	29225.6		0.391826	32825.3		0.391826	36857.9
0.39472	21500.2		0.39472	25513.3		0.39472	26445.8		0.39472	29146.1		0.39472	32725.9		0.39472	36732.7
0.397614	21696.3		0.397614	25745.4		0.397614	26390.3		0.397614	29066.5		0.397614	32626.7		0.397614	36607.7
0.400508	21894.9		0.400508	25974		0.400508	26334.1		0.400508	28986.9		0.400508	32527.8		0.400508	36483
0.403402	22095.5		0.403402	26198.3		0.403402	26277.1		0.403402	28907.4		0.403402	32429.2		0.403402	36358.7
0.403402	22095.5		0.403402	26198.3		0.403402	26277.1		0.403402	28907.4		0.403402	32429.2		0.403402	36358.7
0.406296	22297.7		0.406296	26416.8		0.406296	26219.3		0.406296	28827.9		0.406296	32330.9		0.406296	36234.8
0.40919	22501.1		0.40919	26627.9		0.40919	26160.8		0.40919	28748.6		0.40919	32232.8		0.40919	36111.2
0.412084	22705.1		0.412084	26830.1		0.412084	26101.7		0.412084	28669.5		0.412084	32135		0.412084	35987.9
0.414977	22908.6		0.414977	27021.8		0.414977	26041.8		0.414977	28590.4		0.414977	32037.5		0.414977	35864.9
0.417871	23110.8		0.417871	27201.1		0.417871	25981.4		0.417871	28511.6		0.417871	31940.2		0.417871	35742.3
0.420765	23310.8		0.420765	27365.4		0.420765	25920.4		0.420765	28432.9		0.420765	31843.1		0.420765	35620.1
0.423659	23507.6		0.423659	27512.4		0.423659	25858.8		0.423659	28354.4		0.423659	31746.3		0.423659	35498.3
0.426553	23700.4		0.426553	27638.9		0.426553	25796.9		0.426553	28276.1		0.426553	31649.8		0.426553	35376.9
0.429447	23887.7		0.429447	27741.9		0.429447	25734.5		0.429447	28198		0.429447	31553.4		0.429447	35256
0.432341	24066.8		0.432341	27816.9		0.432341	25671.8		0.432341	28120.1		0.432341	31457.3		0.432341	35135.5
0.435235	24235.8		0.435235	27868.1		0.435235	25608.9		0.435235	28042.3		0.435235	31361.4		0.435235	35015.5
0.438129	24393.1		0.438129	27894.3		0.438129	25545.5		0.438129	27964.8		0.438129	31265.7		0.438129	34895.9
0.441023	24536.1		0.441023	27893		0.441023	25481.8		0.441023	27887.4		0.441023	31170.3		0.441023	34776.9
0.443916	24661.5		0.443916	27872.3		0.443916	25418		0.443916	27810.3		0.443916	31075		0.443916	34658.4
0.44681	24766.7		0.44681	27835.6		0.44681	25354.1		0.44681	27733.3		0.44681	30980.1		0.44681	34540.4
0.449704	24848.2		0.449704	27780.9		0.449704	25290.1		0.449704	27656.6		0.449704	30885.5		0.449704	34423.2
0.452598	24909.1		0.452598	27711.1		0.452598	25226		0.452598	27580.2		0.452598	30791.3		0.452598	34306.6
0.455492	24948.6		0.455492	27626.5		0.455492	25161.9		0.455492	27504		0.455492	30697.4		0.455492	34190.7
0.458386	24967.7		0.458386	27529.6		0.458386	25097.6		0.458386	27428		0.458386	30603.9		0.458386	34075.3
0.46128	24969.1		0.46128	27421.1		0.46128	25033.4		0.46128	27352.2		0.46128	30510.6		0.46128	33960.6
0.464174	24953.1		0.464174	27303.7		0.464174	24969.1		0.464174	27276.5		0.464174	30417.8		0.464174	33846.4
0.467068	24925.2		0.467068	27177.5		0.467068	24905.1		0.467068	27201.2		0.467068	30325.4		0.467068	33733.1
0.469961	24887.1		0.469961	27046.5		0.469961	24841.2		0.469961	27126.2		0.469961	30233.7		0.469961	33620.6
0.472855	24837.3		0.472855	26910.6		0.472855	24777.4		0.472855	27051.5		0.472855	30142.4		0.472855	33508.9
0.475749	24777		0.475749	26770.1		0.475749	24713.8		0.475749	26977.1		0.475749	30051.7		0.475749	33397.9
0.478643	24708.2		0.478643	26629.2		0.478643	24650.4		0.478643	26902.9		0.478643	29961.5		0.478643	33287.6
0.481537	24631		0.481537	26484.9		0.481537	24587.1		0.481537	26829.1		0.481537	29871.8		0.481537	33178.1
0.484431	24547.8		0.484431	26341.2		0.484431	24524		0.484431	26755.5		0.484431	29782.7		0.484431	33069.4
0.487325	24459.9		0.487325	26199.9		0.487325	24461.1		0.487325	26682.4		0.487325	29694.2		0.487325	32961.5
0.490219	24367.3		0.490219	26057.3		0.490219	24398.4		0.490219	26609.6		0.490219	29606.3		0.490219	32854.4
0.493113	24273.3		0.493113	25919.1		0.493113	24335.9		0.493113	26537.3		0.493113	29519		0.493113	32748.1
0.496006	24176.6		0.496006	25783.8		0.496006	24273.5		0.496006	26465.3		0.496006	29432.4		0.496006	32642.6
0.4989	24079.3		0.4989	25648.6		0.4989	24211.4		0.4989	26393.6		0.4989	29346.3		0.4989	32537.9
0.501794	23983.3		0.501794	25520.8		0.501794	24149.5		0.501794	26322.4		0.501794	29260.8		0.501794	32433.8
0.504688	23886.5		0.504688	25395.3		0.504688	24087.8		0.504688	26251.5		0.504688	29175.9		0.504688	32330.5
0.507582	23792.6		0.507582	25272.3		0.507582	24026.3		0.507582	26181.1		0.507582	29091.7		0.507582	32228
0.510476	23699.3		0.510476	25156.3		0.510476	23965		0.510476	26111.2		0.510476	29008.1		0.510476	32126.2
0.51337	23607.5		0.51337	25042.3		0.51337	23904		0.51337	26041.7		0.51337	28925.1		0.51337	32025.1
0.516264	23520		0.516264	24933.3		0.516264	23843		0.516264	25972.6		0.516264	28842.5		0.516264	31924.5
0.519158	23432.6		0.519158	24829.1		0.519158	23782.1		0.519158	25903.8		0.519158	28760.4		0.519158	31824.2
0.522051	23349.4		0.522051	24727.4		0.522051	23721.3		0.522051	25835.3		0.522051	28678.6		0.522051	31724.5
0.524945	23269.3		0.524945	24632.2		0.524945	23660.7		0.524945	25767.2		0.524945	28597.4		0.524945	31625.3
0.524945	23269.3		0.524945	24632.2		0.524945	23660.7		0.524945	25767.2		0.524945	28597.4		0.524945	31625.3
0.527839	23190.3		0.527839	24538.6		0.527839	23600.2		0.527839	25699.5		0.527839	28516.6		0.527839	31526.6
0.530733	23116.7		0.530733	24451.1		0.530733	23539.8		0.530733	25632.2		0.530733	28436.2		0.530733	31428.2
0.533627	23044.9		0.533627	24365.9		0.533627	23479.5		0.533627	25565.2		0.533627	28356.2		0.533627	31330.2
0.536521	22975.4		0.536521	24284.3		0.536521	23419.3		0.536521	25498.4		0.536521	28276.4		0.536521	31232.5
0.539415	22910.2		0.539415	24207.6		0.539415	23359.2		0.539415	25431.9		0.539415	28196.9		0.539415	31135.1
0.542309	22847.3		0.542309	24132.9		0.542309	23299.1		0.542309	25365.6		0.542309	28117.6		0.542309	31038
0.545203	22787.1		0.545203	24062.4		0.545203	23239.1		0.545203	25299.6		0.545203	28038.5		0.545203	30941.1
0.548096	22730.1		0.548096	23994.4		0.548096	23179.2		0.548096	25233.8		0.548096	27959.5		0.548096	30844.4
0.55099	22675.5		0.55099	23929.5		0.55099	23119.3		0.55099	25168.1		0.55099	27880.8		0.55099	30747.9
0.553884	22623.5		0.553884	23867.4		0.553884	23059.5		0.553884	25102.6		0.553884	27802.1		0.553884	30651.6
0.556778	22574.2		0.556778	23807.7		0.556778	22999.7		0.556778	25037.2		0.556778	27723.5		0.556778	30555.4
0.559672	22527.4		0.559672	23750.9		0.559672	22940		0.559672	24971.8		0.559672	27645		0.559672	30459.3
0.562566	22483.1		0.562566	23696.1		0.562566	22880.3		0.562566	24906.6		0.562566	27566.5		0.562566	30363.4
0.56546	22441.3		0.56546	23643.5		0.56546	22820.6		0.56546	24841.3		0.56546	27488		0.56546	30267.5
0.568354	22401.4		0.568354	23593		0.568354	22760.9		0.568354	24776.2		0.568354	27409.6		0.568354	30171.7
0.571248	22364		0.571248	23544.5		0.571248	22701.2		0.571248	24711		0.571248	27331.2		0.571248	30076.1
0.574142	22328.2		0.574142	23497.8		0.574142	22641.6		0.574142	24645.8		0.574142	27252.7		0.574142	29980.5
0.577035	22294.1		0.577035	23452.5		0.577035	22581.9		0.577035	24580.7		0.577035	27174.3		0.577035	29884.9
0.579929	22261.7		0.579929	23409.1		0.579929	22522.3		0.579929	24515.5		0.579929	27095.8		0.579929	29789.4
0.582823	22230.9		0.582823	23366.9		0.582823	22462.7		0.582823	24450.2		0.582823	27017.3		0.582823	29694
0.585717	22201.5		0.585717	23326		0.585717	22403.1		0.585717	24384.9		0.585717	26938.7		0.585717	29598.6
0.588611	22173.4		0.588611	23286.3		0.588611	22343.6		0.588611	24319.7		0.588611	26860.2		0.588611	29503.3
0.591505	22146.4		0.591505	23247.8		0.591505	22284.1		0.591505	24254.4		0.591505	26781.6		0.591505	29408.1
0.594399	22120.6		0.594399	23210.1		0.594399	22224.8		0.594399	24189.1		0.594399	26703.1		0.594399	29313
0.597293	22096.2		0.597293	23173.6		0.597293	22165.6		0.597293	24124		0.597293	26624.7		0.597293	29218
0.600186	22072.8		0.600186	23137.9		0.600186	22106.6		0.600186	24058.9		0.600186	26546.4		0.600186	29123.2
0.60308	22050.4		0.60308	23103		0.60308	22047.8		0.60308	23993.8		0.60308	26468.1		0.60308	29028.5
0.605974	22029		0.605974	23068.9		0.605974	21989.2		0.605974	23928.8		0.605974	26389.9		0.605974	28933.9
0.608868	22008.5		0.608868	23035.7		0.608868	21930.8		0.608868	23864		0.608868	26311.8		0.608868	28839.5
0.611762	21989		0.611762	23003.4		0.611762	21872.8		0.611762	23799.4		0.611762	26233.9		0.611762	28745.4
0.614656	21970.5		0.614656	22972.2		0.614656	21815.3		0.614656	23735.2		0.614656	26156.5		0.614656	28651.6
0.61755	21953.1		0.61755	22941.8		0.61755	21758.3		0.61755	23671.3		0.61755	26079.3		0.61755	28558.3
0.620444	21936.8		0.620444	22912.5		0.620444	21701.8		0.620444	23607.8		0.620444	26002.5		0.620444	28465.3
0.623338	21921.5		0.623338	22884.3		0.623338	21645.9		0.623338	23544.7		0.623338	25926.1		0.623338	28372.7
0.626231	21907.5		0.626231	22857.4		0.626231	21590.5		0.626231	23482		0.626231	25850.1		0.626231	28280.6
0.629125	21894.7		0.629125	22831.7		0.629125	21536		0.629125	23420		0.629125	25774.7		0.629125	28189
0.632019	21883		0.632019	22807.3		0.632019	21482.3		0.632019	23358.6		0.632019	25700		0.632019	28098.1
0.634913	21872.6		0.634913	22784.3		0.634913	21429.7		0.634913	23298.2		0.634913	25626.1		0.634913	28008
0.637807	21863.7		0.637807	22762.5		0.637807	21378.3		0.637807	23238.7		0.637807	25553.1		0.637807	27918.9
0.640701	21856.6		0.640701	22742.5		0.640701	21328.2		0.640701	23180.4		0.640701	25481.3		0.640701	27830.9
0.643595	21851.3		0.643595	22724.2		0.643595	21279.6		0.643595	23123.6		0.643595	25410.9		0.643595	27744.2
0.643595	21851.3		0.643595	22724.2		0.643595	21279.6		0.643595	23123.6		0.643595	25410.9		0.643595	27744.2
0.646489	21848		0.646489	22708		0.646489	21232.7		0.646489	23068.2		0.646489	25342		0.646489	27659.1
0.649383	21846.9		0.649383	22694		0.649383	21187.7		0.649383	23014.5		0.649383	25274.8		0.649383	27575.7
0.652277	21848.1		0.652277	22682.4		0.652277	21144.6		0.652277	22962.7		0.652277	25209.5		0.652277	27494.1
0.65517	21851.6		0.65517	22673.3		0.65517	21103.6		0.65517	22912.8		0.65517	25146.2		0.65517	27414.5
0.658064	21857.5		0.658064	22666.8		0.658064	21064.7		0.658064	22865.1		0.658064	25084.9		0.658064	27337.1
0.660958	21865.5		0.660958	22662.4		0.660958	21027.7		0.660958	22819.1		0.660958	25025.8		0.660958	27261.7
0.663852	21876.1		0.663852	22660.6		0.663852	20992.7		0.663852	22775.2		0.663852	24968.5		0.663852	27188.4
0.666746	21888.7		0.666746	22661		0.666746	20959.6		0.666746	22733.2		0.666746	24913.6		0.666746	27117.3
0.66964	21904.1		0.66964	22664.1		0.66964	20928.3		0.66964	22693.2		0.66964	24860.7		0.66964	27048.5
0.672534	21921.4		0.672534	22669.4		0.672534	20898.8		0.672534	22655.1		0.672534	24809.9		0.672534	26981.9
0.675428	21940.8		0.675428	22676.9		0.675428	20871.2		0.675428	22618.7		0.675428	24761.1		0.675428	26917.5
0.678322	21962		0.678322	22686.4		0.678322	20847.3		0.678322	22584.4		0.678322	24714.2		0.678322	26855.4
0.681215	21984.6		0.681215	22697.4		0.681215	20824.8		0.681215	22553.8		0.681215	24669.4		0.681215	26795.2
0.684109	22009.1		0.684109	22710.7		0.684109	20805		0.684109	22524.7		0.684109	24628.8		0.684109	26737.7
0.687003	22036.2		0.687003	22726.3		0.687003	20787		0.687003	22498.6		0.687003	24589.9		0.687003	26684.9
0.689897	22065.1		0.689897	22744.7		0.689897	20771.4		0.689897	22474.2		0.689897	24554.3		0.689897	26634
0.692791	22095.3		0.692791	22763.8		0.692791	20757.5		0.692791	22452.5		0.692791	24520.5		0.692791	26587
0.695685	22127.9		0.695685	22786.8		0.695685	20746		0.695685	22432.6		0.695685	24490		0.695685	26542.3
0.698579	22160.4		0.698579	22809.7		0.698579	20736.1		0.698579	22415.2		0.698579	24461.4		0.698579	26501.5
0.701473	22196.5		0.701473	22834.5		0.701473	20728.2		0.701473	22399.4		0.701473	24435.8		0.701473	26463.2
0.704367	22231.8		0.704367	22859.9		0.704367	20721.7		0.704367	22385.8		0.704367	24412		0.704367	26428.4
0.70726	22267.8		0.70726	22886.1		0.70726	20716.8		0.70726	22373.5		0.70726	24390.7		0.70726	26396.1
0.710154	22304.1		0.710154	22912.6		0.710154	20712.7		0.710154	22362.7		0.710154	24371.1		0.710154	26366.7
0.713048	22339.6		0.713048	22938.8		0.713048	20709.7		0.713048	22352.8		0.713048	24353.2		0.713048	26339.3
0.715942	22375		0.715942	22964.8		0.715942	20706.8		0.715942	22343.6		0.715942	24336.4		0.715942	26313.7
0.715942	22375		0.715942	22964.8		0.715942	20706.8		0.715942	22343.6		0.715942	24336.4		0.715942	26313.7
0.718836	22409		0.718836	22989.1		0.718836	20703.9		0.718836	22334.6		0.718836	24320		0.718836	26289.4
0.72173	22441.9		0.72173	23012.7		0.72173	20700.6		0.72173	22325		0.72173	24304		0.72173	26265
0.724624	22471.8		0.724624	23032.8		0.724624	20695.9		0.724624	22314.9		0.724624	24287		0.724624	26240.7
0.727518	22500		0.727518	23051.9		0.727518	20689.9		0.727518	22302.7		0.727518	24269.3		0.727518	26214.8
0.730412	22524.6		0.730412	23067.6		0.730412	20681.1		0.730412	22289		0.730412	24249		0.730412	26187.4
0.733305	22545.7		0.733305	23079.3		0.733305	20670.1		0.733305	22271.7		0.733305	24226.6		0.733305	26156
0.736199	22562.1		0.736199	23086.3		0.736199	20654.9		0.736199	22251.6		0.736199	24199.7		0.736199	26121.4
0.739093	22573.3		0.739093	23088		0.739093	20636.5		0.739093	22226.7		0.739093	24169.2		0.739093	26080.9
0.741987	22578.6		0.741987	23084		0.741987	20612.7		0.741987	22197.9		0.741987	24132.2		0.741987	26035.4
0.744881	22577.6		0.744881	23073.8		0.744881	20585.5		0.744881	22162.6		0.744881	24091.1		0.744881	25981.7
0.747775	22570.1		0.747775	23057.5		0.747775	20552.4		0.747775	22123.6		0.747775	24043		0.747775	25922.7
0.750669	22556.1		0.750669	23035		0.750669	20514.7		0.750669	22078.8		0.750669	23988.5		0.750669	25855.9
0.753563	22536.2		0.753563	23006.5		0.753563	20473		0.753563	22028.2		0.753563	23928.4		0.753563	25780.9
0.756457	22510.3		0.756457	22973.1		0.756457	20427.1		0.756457	21974		0.756457	23862.7		0.756457	25700.3
0.75935	22479.8		0.75935	22934.6		0.75935	20378.6		0.75935	21916		0.75935	23792.4		0.75935	25614
0.762244	22445.4		0.762244	22892.7		0.762244	20328.4		0.762244	21855.6		0.762244	23718.7		0.762244	25523.7
0.765138	22408.6		0.765138	22848.6		0.765138	20277.7		0.765138	21794		0.765138	23642.7		0.765138	25430.5
0.768032	22371.2		0.768032	22804		0.768032	20227.9		0.768032	21732.7		0.768032	23565.9		0.768032	25336.5
0.770926	22335.4		0.770926	22761.7		0.770926	20180.4		0.770926	21673.3		0.770926	23490.5		0.770926	25244.8
0.77382	22305.4		0.77382	22724		0.77382	20137.4		0.77382	21618.2		0.77382	23419.2		0.77382	25157.5
0.776714	22281.7		0.776714	22693.1		0.776714	20099.2		0.776714	21568.1		0.776714	23353.3		0.776714	25078.1
0.779608	22267.2		0.779608	22670.4		0.779608	20070.6		0.779608	21526.8		0.779608	23296.9		0.779608	25010.4
0.782502	22268.9		0.782502	22663		0.782502	20057		0.782502	21501.7		0.782502	23257.7		0.782502	24960.1
0.785396	22296.1		0.785396	22680.4		0.785396	20060.9		0.785396	21495.8		0.785396	23240.1		0.785396	24935.5
0.788289	22353		0.788289	22727		0.788289	20088.7		0.788289	21515		0.788289	23251.5		0.788289	24943.3
0.791183	22443.9		0.791183	22808.1		0.791183	20145.9		0.791183	21566.5		0.791183	23299.4		0.791183	24990.2
0.794077	22572.8		0.794077	22928.1		0.794077	20235.1		0.794077	21653.1		0.794077	23387.6		0.794077	25081.2
0.796971	22738.7		0.796971	23087		0.796971	20357		0.796971	21776.1		0.796971	23517.6		0.796971	25217.5
0.799865	22939.8		0.799865	23283.2		0.799865	20511		0.799865	21935.1		0.799865	23688.9		0.799865	25398.4
0.799865	22939.8		0.799865	23283.2		0.799865	20511		0.799865	21935.1		0.799865	23688.9		0.799865	25398.4
0.802759	23172.2		0.802759	23512.9		0.802759	20694.5		0.802759	22127.5		0.802759	23898.6		0.802759	25620.9
0.805653	23430.7		0.805653	23771.1		0.805653	20903.4		0.805653	22349.3		0.805653	24141.8		0.805653	25879.9
0.808547	23708.4		0.808547	24051		0.808547	21132.7		0.808547	22594.9		0.808547	24412.6		0.808547	26169
0.811441	23996		0.811441	24343.1		0.811441	21375.1		0.811441	22856.7		0.811441	24701.6		0.811441	26478
0.814334	24283.5		0.814334	24636.8		0.814334	21621.8		0.814334	23124.6		0.814334	24997.6		0.814334	26795
0.817228	24559.2		0.817228	24920.2		0.817228	21862.6		0.817228	23387.7		0.817228	25287.3		0.817228	27105.4
0.820122	24811.8		0.820122	25181.7		0.820122	22087.8		0.820122	23633.4		0.820122	25559		0.820122	27396.3
0.823016	25034.4		0.823016	25413.7		0.823016	22291		0.823016	23854.6		0.823016	25800.7		0.823016	27654.9
0.82591	25221.9		0.82591	25610.8		0.82591	22466		0.82591	24044.6		0.82591	26009.7		0.82591	27877.4
0.828804	25380.4		0.828804	25778.2		0.828804	22617.4		0.828804	24206.5		0.828804	26181.2		0.828804	28059.1
0.831698	25529		0.831698	25933.7		0.831698	22759.3		0.831698	24356.5		0.831698	26337.7		0.831698	28223.7
0.834592	25737.1		0.834592	26142		0.834592	22940.3		0.834592	24546.4		0.834592	26541.8		0.834592	28438.3
0.837486	26102.8		0.837486	26508.7		0.837486	23249.9		0.837486	24874.2		0.837486	26890.2		0.837486	28808.3
0.840379	26659		0.840379	27080		0.840379	23732.9		0.840379	25389.9		0.840379	27447.4		0.840379	29407.8
0.843273	27373.3		0.843273	27824.1		0.843273	24368.1		0.843273	26071.7		0.843273	28190.4		0.843273	30216.2
0.846167	28195.9		0.846167	28690.7		0.846167	25118.9		0.846167	26878.4		0.846167	29073.2		0.846167	31182
0.849061	29081.5		0.849061	29637.7		0.849061	25957.2		0.849061	27772.8		0.849061	30050		0.849061	32251.5
0.851955	30023.5		0.851955	30659.3		0.851955	26891.9		0.851955	28764.7		0.851955	31127.4		0.851955	33426
0.854849	30939.9		0.854849	31657.5		0.854849	27832.4		0.854849	29771.8		0.854849	32228.8		0.854849	34628.8
0.857743	31699.7		0.857743	32491		0.857743	28642.8		0.857743	30646		0.857743	33193.5		0.857743	35687.2
0.860637	32307.5		0.860637	33165.5		0.860637	29329.5		0.860637	31382.1		0.860637	34001.8		0.860637	36570.4
0.863531	33157.3		0.863531	34069.3		0.863531	30195.4		0.863531	32312.9		0.863531	35021		0.863531	37676
0.866424	34782.8		0.866424	35785.3		0.866424	31735.4		0.866424	33978.8		0.866424	36852.2		0.866424	39668
0.869318	36984.5		0.869318	38147.9		0.869318	33857.5		0.869318	36277.3		0.869318	39383.5		0.869318	42432.5
0.872212	39067.2		0.872212	40424.8		0.872212	35950.3		0.872212	38544.3		0.872212	41880.3		0.872212	45164.8
0.875106	40516.9		0.875106	42054.8		0.875106	37497.3		0.875106	40221.1		0.875106	43726.2		0.875106	47187.7
0.878	41033.6		0.878	42651.8		0.878	38078.8		0.878	40852.2		0.878	44420.6		0.878	47949.3
