# Supplementary material for: Assessment of the impact of using Ammonia-Hydrogen fuel blend in a diffusion combustor: A numerical approach
Source: Research Square preprint supplement (doi:10.21203/rs.3.rs-7960312/v1), 2025-11-25
Supplement: Supplementary file 6 [file b055bfd3f21ea69098ac01cd.xlsx]

## Sheet: Axial temp distribution
SN 0			SN 0.2			SN 0.4			SN 0.6			SN 0.8			SN 1
Axial distance	temperature		Axial distance	temperature		Axial distance	temperature		Axial distance	temperature		Axial distance	temperature		Axial distance	temperature
0.00115113	322.413		0.00115113	322.602		0.00115113	323.009		0.00115113	320.753		0.00115113	319.581		0.00115113	319.688
0.00404502	330.471		0.00404502	330.782		0.00404502	330.942		0.00404502	329.423		0.00404502	328.075		0.00404502	328.368
0.00693891	338.913		0.00693891	339.181		0.00693891	339.123		0.00693891	338.108		0.00693891	336.884		0.00693891	337.617
0.0098328	347.137		0.0098328	347.231		0.0098328	347.145		0.0098328	346.383		0.0098328	345.635		0.0098328	346.618
0.0127267	355.118		0.0127267	355.24		0.0127267	355.072		0.0127267	354.602		0.0127267	354.243		0.0127267	355.741
0.0156206	362.832		0.0156206	363.03		0.0156206	362.898		0.0156206	362.814		0.0156206	362.717		0.0156206	364.744
0.0185145	370.119		0.0185145	370.357		0.0185145	370.337		0.0185145	370.948		0.0185145	371.135		0.0185145	373.187
0.0214084	377.15		0.0214084	377.376		0.0214084	377.455		0.0214084	378.789		0.0214084	379.188		0.0214084	381.002
0.0243023	383.71		0.0243023	383.936		0.0243023	384.285		0.0243023	386.349		0.0243023	386.768		0.0243023	388.246
0.0271961	389.982		0.0271961	390.202		0.0271961	390.837		0.0271961	393.672		0.0271961	393.887		0.0271961	394.829
0.03009	396.231		0.03009	396.402		0.03009	397.102		0.03009	400.69		0.03009	400.388		0.03009	400.846
0.0329839	402.274		0.0329839	402.363		0.0329839	403.099		0.0329839	407.354		0.0329839	406.342		0.0329839	406.415
0.0358778	408.066		0.0358778	408.068		0.0358778	408.855		0.0358778	413.47		0.0358778	411.922		0.0358778	411.553
0.0387717	413.579		0.0387717	413.482		0.0387717	414.383		0.0387717	419.228		0.0387717	417.009		0.0387717	416.43
0.0416656	418.859		0.0416656	418.616		0.0416656	419.731		0.0416656	424.895		0.0416656	421.985		0.0416656	421.149
0.0445595	423.97		0.0445595	423.61		0.0445595	424.918		0.0445595	430.497		0.0445595	427.229		0.0445595	425.57
0.0474534	428.931		0.0474534	428.522		0.0474534	429.934		0.0474534	436.488		0.0474534	432.571		0.0474534	429.867
0.0503473	433.753		0.0503473	433.313		0.0503473	434.528		0.0503473	444.126		0.0503473	438.876		0.0503473	434.122
0.0532412	438.449		0.0532412	437.978		0.0532412	439.097		0.0532412	455.868		0.0532412	447.769		0.0532412	438.556
0.056135	443.014		0.056135	442.53		0.056135	444.02		0.056135	476.257		0.056135	462.083		0.056135	443.738
0.0590289	447.478		0.0590289	446.996		0.0590289	449.003		0.0590289	514.313		0.0590289	488.407		0.0590289	450.641
0.0619228	451.871		0.0619228	451.4		0.0619228	454.006		0.0619228	587.189		0.0619228	539.092		0.0619228	461.937
0.0648167	456.211		0.0648167	455.743		0.0648167	459.097		0.0648167	716.931		0.0648167	634.245		0.0648167	482.117
0.0677106	460.519		0.0677106	460.019		0.0677106	464.175		0.0677106	907.977		0.0677106	790.442		0.0677106	519.48
0.0706045	464.791		0.0706045	464.244		0.0706045	469.56		0.0706045	1125.68		0.0706045	996.005		0.0706045	588.207
0.0734984	469.043		0.0734984	468.445		0.0734984	475.568		0.0734984	1305.48		0.0734984	1199.91		0.0734984	704.569
0.0763923	473.27		0.0763923	472.632		0.0763923	482.764		0.0763923	1399.32		0.0763923	1339.22		0.0763923	872.157
0.0792862	477.47		0.0792862	476.814		0.0792862	492.676		0.0792862	1409.21		0.0792862	1385.31		0.0792862	1068.56
0.0821801	481.696		0.0821801	481.008		0.0821801	508.447		0.0821801	1375.12		0.0821801	1365.98		0.0821801	1246.86
0.085074	485.96		0.085074	485.203		0.085074	537.029		0.085074	1332.3		0.085074	1327.13		0.085074	1361.53
0.085074	485.96		0.085074	485.203		0.085074	537.029		0.085074	1332.3		0.085074	1327.13		0.085074	1361.53
0.0879678	490.226		0.0879678	489.422		0.0879678	589.127		0.0879678	1291.86		0.0879678	1289.91		0.0879678	1396.73
0.0908617	494.51		0.0908617	493.701		0.0908617	676.361		0.0908617	1256.67		0.0908617	1258.58		0.0908617	1378.32
0.0937556	498.838		0.0937556	498.046		0.0937556	803.905		0.0937556	1226.9		0.0937556	1233.23		0.0937556	1343.96
0.0966495	503.206		0.0966495	502.457		0.0966495	964.601		0.0966495	1201.84		0.0966495	1212.98		0.0966495	1310.72
0.0995434	507.639		0.0995434	506.922		0.0995434	1139.34		0.0995434	1180.84		0.0995434	1196.9		0.0995434	1283.55
0.102437	512.163		0.102437	511.485		0.102437	1301.21		0.102437	1163.13		0.102437	1184.11		0.102437	1262.4
0.105331	516.758		0.105331	516.172		0.105331	1425.1		0.105331	1148.31		0.105331	1173.93		0.105331	1245.78
0.108225	521.432		0.108225	520.97		0.108225	1496.99		0.108225	1135.96		0.108225	1165.86		0.108225	1232.71
0.111119	526.183		0.111119	525.877		0.111119	1514.73		0.111119	1125.71		0.111119	1159.48		0.111119	1222.46
0.114013	531.016		0.114013	530.914		0.114013	1490.41		0.114013	1117.31		0.114013	1154.43		0.114013	1214.42
0.116907	535.97		0.116907	536.084		0.116907	1444.53		0.116907	1110.45		0.116907	1150.5		0.116907	1208.22
0.119801	541.047		0.119801	541.392		0.119801	1392.02		0.119801	1104.88		0.119801	1147.52		0.119801	1203.42
0.122695	546.244		0.122695	546.867		0.122695	1340.31		0.122695	1100.42		0.122695	1145.25		0.122695	1199.68
0.125588	551.571		0.125588	552.521		0.125588	1292.8		0.125588	1096.91		0.125588	1143.52		0.125588	1196.8
0.128482	557.023		0.128482	558.342		0.128482	1251.01		0.128482	1094.15		0.128482	1142.19		0.128482	1194.63
0.131376	562.602		0.131376	564.341		0.131376	1215.04		0.131376	1092		0.131376	1141.17		0.131376	1192.97
0.13427	568.328		0.13427	570.523		0.13427	1184.32		0.13427	1090.33		0.13427	1140.36		0.13427	1191.69
0.137164	574.207		0.137164	576.929		0.137164	1158.38		0.137164	1089.02		0.137164	1139.7		0.137164	1190.68
0.140058	580.219		0.140058	583.582		0.140058	1136.62		0.140058	1088		0.140058	1139.16		0.140058	1189.87
0.142952	586.38		0.142952	590.445		0.142952	1118.51		0.142952	1087.19		0.142952	1138.69		0.142952	1189.2
0.145846	592.722		0.145846	597.505		0.145846	1103.46		0.145846	1086.54		0.145846	1138.27		0.145846	1188.62
0.14874	599.235		0.14874	604.768		0.14874	1090.97		0.14874	1086.01		0.14874	1137.89		0.14874	1188.1
0.151633	605.888		0.151633	612.238		0.151633	1080.63		0.151633	1085.56		0.151633	1137.53		0.151633	1187.62
0.154527	612.698		0.154527	619.842		0.154527	1072.08		0.154527	1085.17		0.154527	1137.19		0.154527	1187.17
0.157421	619.641		0.157421	627.408		0.157421	1065.02		0.157421	1084.82		0.157421	1136.85		0.157421	1186.74
0.160315	626.69		0.160315	635.191		0.160315	1059.22		0.160315	1084.5		0.160315	1136.51		0.160315	1186.31
0.163209	633.681		0.163209	643.406		0.163209	1054.47		0.163209	1084.2		0.163209	1136.18		0.163209	1185.89
0.166103	640.765		0.166103	651.849		0.166103	1050.59		0.166103	1083.91		0.166103	1135.85		0.166103	1185.47
0.166103	640.765		0.166103	651.849		0.166103	1050.59		0.166103	1083.91		0.166103	1135.85		0.166103	1185.47
0.168997	648.173		0.168997	660.477		0.168997	1047.45		0.168997	1083.63		0.168997	1135.51		0.168997	1185.05
0.171891	655.735		0.171891	669.242		0.171891	1044.91		0.171891	1083.36		0.171891	1135.18		0.171891	1184.63
0.174785	663.393		0.174785	678.121		0.174785	1042.87		0.174785	1083.09		0.174785	1134.85		0.174785	1184.21
0.177678	671.123		0.177678	687.128		0.177678	1041.22		0.177678	1082.82		0.177678	1134.51		0.177678	1183.78
0.180572	678.89		0.180572	696.241		0.180572	1039.9		0.180572	1082.55		0.180572	1134.17		0.180572	1183.36
0.183466	686.7		0.183466	705.381		0.183466	1038.84		0.183466	1082.28		0.183466	1133.83		0.183466	1182.92
0.18636	694.577		0.18636	714.549		0.18636	1037.99		0.18636	1082.01		0.18636	1133.48		0.18636	1182.48
0.189254	702.418		0.189254	723.821		0.189254	1037.3		0.189254	1081.73		0.189254	1133.13		0.189254	1182.04
0.192148	710.215		0.192148	733.206		0.192148	1036.74		0.192148	1081.46		0.192148	1132.78		0.192148	1181.59
0.195042	718.034		0.195042	742.703		0.195042	1036.26		0.195042	1081.18		0.195042	1132.42		0.195042	1181.14
0.197936	725.883		0.197936	752.316		0.197936	1035.86		0.197936	1080.89		0.197936	1132.06		0.197936	1180.67
0.20083	733.782		0.20083	762.041		0.20083	1035.51		0.20083	1080.61		0.20083	1131.69		0.20083	1180.21
0.203723	741.723		0.203723	771.851		0.203723	1035.19		0.203723	1080.31		0.203723	1131.32		0.203723	1179.73
0.206617	749.708		0.206617	781.73		0.206617	1034.9		0.206617	1080.02		0.206617	1130.94		0.206617	1179.25
0.209511	757.714		0.209511	791.681		0.209511	1034.63		0.209511	1079.72		0.209511	1130.55		0.209511	1178.76
0.212405	765.73		0.212405	801.705		0.212405	1034.37		0.212405	1079.42		0.212405	1130.17		0.212405	1178.27
0.215299	773.805		0.215299	811.815		0.215299	1034.12		0.215299	1079.11		0.215299	1129.77		0.215299	1177.77
0.215299	773.805		0.215299	811.815		0.215299	1034.12		0.215299	1079.11		0.215299	1129.77		0.215299	1177.77
0.218193	781.934		0.218193	822.017		0.218193	1033.87		0.218193	1078.8		0.218193	1129.37		0.218193	1177.26
0.221087	790.08		0.221087	832.309		0.221087	1033.63		0.221087	1078.49		0.221087	1128.97		0.221087	1176.74
0.223981	798.222		0.223981	842.692		0.223981	1033.38		0.223981	1078.17		0.223981	1128.56		0.223981	1176.22
0.226875	806.355		0.226875	853.167		0.226875	1033.14		0.226875	1077.85		0.226875	1128.15		0.226875	1175.7
0.229768	814.49		0.229768	863.741		0.229768	1032.89		0.229768	1077.52		0.229768	1127.73		0.229768	1175.16
0.232662	822.627		0.232662	874.426		0.232662	1032.65		0.232662	1077.2		0.232662	1127.31		0.232662	1174.62
0.235556	830.766		0.235556	885.227		0.235556	1032.4		0.235556	1076.86		0.235556	1126.88		0.235556	1174.07
0.23845	838.917		0.23845	896.143		0.23845	1032.15		0.23845	1076.53		0.23845	1126.45		0.23845	1173.52
0.241344	847.073		0.241344	907.179		0.241344	1031.9		0.241344	1076.19		0.241344	1126.01		0.241344	1172.96
0.244238	855.232		0.244238	918.357		0.244238	1031.64		0.244238	1075.85		0.244238	1125.57		0.244238	1172.4
0.247132	863.418		0.247132	929.686		0.247132	1031.38		0.247132	1075.5		0.247132	1125.12		0.247132	1171.83
0.250026	871.642		0.250026	941.167		0.250026	1031.12		0.250026	1075.15		0.250026	1124.67		0.250026	1171.25
0.25292	879.905		0.25292	952.775		0.25292	1030.86		0.25292	1074.8		0.25292	1124.22		0.25292	1170.66
0.255814	888.207		0.255814	964.525		0.255814	1030.59		0.255814	1074.45		0.255814	1123.76		0.255814	1170.07
0.258707	896.541		0.258707	976.457		0.258707	1030.32		0.258707	1074.09		0.258707	1123.3		0.258707	1169.48
0.261601	904.912		0.261601	988.608		0.261601	1030.05		0.261601	1073.73		0.261601	1122.83		0.261601	1168.88
0.264495	913.348		0.264495	1000.98		0.264495	1029.77		0.264495	1073.37		0.264495	1122.36		0.264495	1168.27
0.267389	921.849		0.267389	1013.53		0.267389	1029.49		0.267389	1073		0.267389	1121.88		0.267389	1167.66
0.270283	930.416		0.270283	1026.26		0.270283	1029.21		0.270283	1072.63		0.270283	1121.4		0.270283	1167.04
0.273177	939.055		0.273177	1039.18		0.273177	1028.92		0.273177	1072.26		0.273177	1120.92		0.273177	1166.42
0.276071	947.784		0.276071	1052.28		0.276071	1028.64		0.276071	1071.88		0.276071	1120.43		0.276071	1165.79
0.278965	956.597		0.278965	1065.56		0.278965	1028.35		0.278965	1071.5		0.278965	1119.93		0.278965	1165.16
0.281859	965.501		0.281859	1079.06		0.281859	1028.06		0.281859	1071.12		0.281859	1119.44		0.281859	1164.52
0.284752	974.518		0.284752	1092.8		0.284752	1027.76		0.284752	1070.74		0.284752	1118.94		0.284752	1163.87
0.287646	983.652		0.287646	1106.74		0.287646	1027.46		0.287646	1070.35		0.287646	1118.43		0.287646	1163.22
0.29054	992.914		0.29054	1120.89		0.29054	1027.16		0.29054	1069.97		0.29054	1117.93		0.29054	1162.57
0.293434	1002.32		0.293434	1135.31		0.293434	1026.86		0.293434	1069.58		0.293434	1117.41		0.293434	1161.91
0.296328	1011.86		0.296328	1150.07		0.296328	1026.56		0.296328	1069.18		0.296328	1116.9		0.296328	1161.24
0.299222	1021.57		0.299222	1165.18		0.299222	1026.25		0.299222	1068.79		0.299222	1116.38		0.299222	1160.57
0.302116	1031.44		0.302116	1180.44		0.302116	1025.95		0.302116	1068.39		0.302116	1115.86		0.302116	1159.9
0.30501	1041.49		0.30501	1195.91		0.30501	1025.64		0.30501	1067.99		0.30501	1115.33		0.30501	1159.22
0.307904	1051.72		0.307904	1211.62		0.307904	1025.32		0.307904	1067.58		0.307904	1114.8		0.307904	1158.54
0.310797	1062.13		0.310797	1227.61		0.310797	1025.01		0.310797	1067.18		0.310797	1114.27		0.310797	1157.85
0.313691	1072.75		0.313691	1243.87		0.313691	1024.7		0.313691	1066.77		0.313691	1113.73		0.313691	1157.16
0.313691	1072.75		0.313691	1243.87		0.313691	1024.7		0.313691	1066.77		0.313691	1113.73		0.313691	1157.16
0.316585	1083.61		0.316585	1260.33		0.316585	1024.38		0.316585	1066.36		0.316585	1113.19		0.316585	1156.46
0.319479	1094.71		0.319479	1277.04		0.319479	1024.06		0.319479	1065.95		0.319479	1112.65		0.319479	1155.76
0.322373	1106.09		0.322373	1294.02		0.322373	1023.74		0.322373	1065.53		0.322373	1112.1		0.322373	1155.05
0.325267	1117.75		0.325267	1311.27		0.325267	1023.42		0.325267	1065.12		0.325267	1111.55		0.325267	1154.34
0.328161	1129.71		0.328161	1328.77		0.328161	1023.09		0.328161	1064.7		0.328161	1110.99		0.328161	1153.63
0.331055	1142.03		0.331055	1346.53		0.331055	1022.77		0.331055	1064.28		0.331055	1110.44		0.331055	1152.91
0.333949	1154.77		0.333949	1364.55		0.333949	1022.44		0.333949	1063.86		0.333949	1109.88		0.333949	1152.19
0.336842	1167.84		0.336842	1382.85		0.336842	1022.11		0.336842	1063.43		0.336842	1109.31		0.336842	1151.47
0.339736	1181.24		0.339736	1401.58		0.339736	1021.78		0.339736	1063		0.339736	1108.75		0.339736	1150.74
0.34263	1195.02		0.34263	1420.57		0.34263	1021.45		0.34263	1062.57		0.34263	1108.18		0.34263	1150.01
0.345524	1209.16		0.345524	1439.6		0.345524	1021.12		0.345524	1062.14		0.345524	1107.6		0.345524	1149.28
0.348418	1223.71		0.348418	1458.71		0.348418	1020.79		0.348418	1061.71		0.348418	1107.03		0.348418	1148.54
0.351312	1238.7		0.351312	1477.93		0.351312	1020.45		0.351312	1061.28		0.351312	1106.45		0.351312	1147.8
0.354206	1254.16		0.354206	1497.24		0.354206	1020.11		0.354206	1060.84		0.354206	1105.87		0.354206	1147.05
0.3571	1270.09		0.3571	1516.77		0.3571	1019.78		0.3571	1060.4		0.3571	1105.29		0.3571	1146.3
0.359994	1286.48		0.359994	1536.5		0.359994	1019.44		0.359994	1059.96		0.359994	1104.7		0.359994	1145.55
0.362887	1303.33		0.362887	1556.32		0.362887	1019.1		0.362887	1059.51		0.362887	1104.11		0.362887	1144.8
0.365781	1320.64		0.365781	1576.16		0.365781	1018.75		0.365781	1059.07		0.365781	1103.52		0.365781	1144.04
0.368675	1338.46		0.368675	1595.82		0.368675	1018.41		0.368675	1058.62		0.368675	1102.92		0.368675	1143.29
0.371569	1356.99		0.371569	1615.25		0.371569	1018.07		0.371569	1058.17		0.371569	1102.32		0.371569	1142.53
0.374463	1375.93		0.374463	1634.56		0.374463	1017.72		0.374463	1057.72		0.374463	1101.72		0.374463	1141.76
0.377357	1394.97		0.377357	1653.71		0.377357	1017.38		0.377357	1057.27		0.377357	1101.12		0.377357	1141
0.380251	1414.41		0.380251	1672.63		0.380251	1017.03		0.380251	1056.82		0.380251	1100.52		0.380251	1140.23
0.383145	1434.43		0.383145	1691.26		0.383145	1016.68		0.383145	1056.36		0.383145	1099.91		0.383145	1139.46
0.386039	1454.8		0.386039	1709.5		0.386039	1016.33		0.386039	1055.9		0.386039	1099.3		0.386039	1138.69
0.388932	1475.39		0.388932	1727.49		0.388932	1015.98		0.388932	1055.44		0.388932	1098.69		0.388932	1137.91
0.391826	1496.21		0.391826	1744.89		0.391826	1015.63		0.391826	1054.98		0.391826	1098.08		0.391826	1137.14
0.39472	1517.32		0.39472	1761.54		0.39472	1015.27		0.39472	1054.52		0.39472	1097.46		0.39472	1136.36
0.397614	1538.52		0.397614	1777.4		0.397614	1014.92		0.397614	1054.05		0.397614	1096.85		0.397614	1135.58
0.400508	1559.57		0.400508	1791.98		0.400508	1014.56		0.400508	1053.59		0.400508	1096.23		0.400508	1134.8
0.403402	1580.48		0.403402	1805.08		0.403402	1014.21		0.403402	1053.12		0.403402	1095.6		0.403402	1134.02
0.403402	1580.48		0.403402	1805.08		0.403402	1014.21		0.403402	1053.12		0.403402	1095.6		0.403402	1134.02
0.406296	1601.16		0.406296	1816.45		0.406296	1013.85		0.406296	1052.65		0.406296	1094.98		0.406296	1133.24
0.40919	1621.44		0.40919	1825.03		0.40919	1013.49		0.40919	1052.18		0.40919	1094.36		0.40919	1132.46
0.412084	1641.16		0.412084	1830.76		0.412084	1013.13		0.412084	1051.71		0.412084	1093.73		0.412084	1131.68
0.414977	1660.15		0.414977	1834.42		0.414977	1012.77		0.414977	1051.23		0.414977	1093.1		0.414977	1130.89
0.417871	1678.34		0.417871	1835.84		0.417871	1012.41		0.417871	1050.76		0.417871	1092.48		0.417871	1130.11
0.420765	1695.46		0.420765	1834.88		0.420765	1012.05		0.420765	1050.28		0.420765	1091.84		0.420765	1129.32
0.423659	1711.02		0.423659	1831.89		0.423659	1011.69		0.423659	1049.8		0.423659	1091.21		0.423659	1128.54
0.426553	1724.96		0.426553	1827.1		0.426553	1011.32		0.426553	1049.32		0.426553	1090.58		0.426553	1127.75
0.429447	1735.84		0.429447	1820.59		0.429447	1010.96		0.429447	1048.84		0.429447	1089.95		0.429447	1126.97
0.432341	1743.2		0.432341	1812.61		0.432341	1010.59		0.432341	1048.36		0.432341	1089.31		0.432341	1126.18
0.435235	1748.08		0.435235	1803.42		0.435235	1010.22		0.435235	1047.88		0.435235	1088.67		0.435235	1125.39
0.438129	1750.68		0.438129	1793.21		0.438129	1009.85		0.438129	1047.39		0.438129	1088.04		0.438129	1124.61
0.441023	1751.01		0.441023	1781.89		0.441023	1009.48		0.441023	1046.91		0.441023	1087.4		0.441023	1123.82
0.443916	1748.98		0.443916	1769.57		0.443916	1009.11		0.443916	1046.42		0.443916	1086.76		0.443916	1123.03
0.44681	1744.8		0.44681	1756.56		0.44681	1008.74		0.44681	1045.93		0.44681	1086.12		0.44681	1122.25
0.449704	1738.73		0.449704	1742.95		0.449704	1008.37		0.449704	1045.44		0.449704	1085.48		0.449704	1121.46
0.452598	1731.15		0.452598	1728.82		0.452598	1008		0.452598	1044.95		0.452598	1084.84		0.452598	1120.68
0.455492	1722.14		0.455492	1714.27		0.455492	1007.62		0.455492	1044.46		0.455492	1084.2		0.455492	1119.89
0.458386	1711.89		0.458386	1699.34		0.458386	1007.25		0.458386	1043.97		0.458386	1083.55		0.458386	1119.11
0.46128	1700.72		0.46128	1684.11		0.46128	1006.87		0.46128	1043.48		0.46128	1082.91		0.46128	1118.32
0.464174	1688.61		0.464174	1668.67		0.464174	1006.5		0.464174	1042.98		0.464174	1082.27		0.464174	1117.54
0.467068	1675.73		0.467068	1653.05		0.467068	1006.12		0.467068	1042.49		0.467068	1081.63		0.467068	1116.76
0.469961	1662.49		0.469961	1637.31		0.469961	1005.74		0.469961	1041.99		0.469961	1080.98		0.469961	1115.98
0.472855	1648.68		0.472855	1621.52		0.472855	1005.36		0.472855	1041.5		0.472855	1080.34		0.472855	1115.19
0.475749	1634.22		0.475749	1605.72		0.475749	1004.98		0.475749	1041		0.475749	1079.69		0.475749	1114.42
0.478643	1619.46		0.478643	1589.99		0.478643	1004.6		0.478643	1040.5		0.478643	1079.05		0.478643	1113.64
0.481537	1604.52		0.481537	1574.32		0.481537	1004.22		0.481537	1040		0.481537	1078.41		0.481537	1112.86
0.484431	1589.39		0.484431	1558.72		0.484431	1003.83		0.484431	1039.5		0.484431	1077.76		0.484431	1112.08
0.487325	1574.13		0.487325	1543.27		0.487325	1003.45		0.487325	1039		0.487325	1077.12		0.487325	1111.31
0.490219	1558.8		0.490219	1528.05		0.490219	1003.07		0.490219	1038.5		0.490219	1076.48		0.490219	1110.54
0.493113	1543.4		0.493113	1513.01		0.493113	1002.68		0.493113	1038		0.493113	1075.83		0.493113	1109.76
0.496006	1528.12		0.496006	1498.19		0.496006	1002.3		0.496006	1037.5		0.496006	1075.19		0.496006	1108.99
0.4989	1512.98		0.4989	1483.63		0.4989	1001.91		0.4989	1037		0.4989	1074.55		0.4989	1108.23
0.501794	1497.91		0.501794	1469.33		0.501794	1001.52		0.501794	1036.5		0.501794	1073.91		0.501794	1107.46
0.504688	1482.94		0.504688	1455.25		0.504688	1001.14		0.504688	1035.99		0.504688	1073.27		0.504688	1106.69
0.507582	1468.18		0.507582	1441.4		0.507582	1000.75		0.507582	1035.49		0.507582	1072.62		0.507582	1105.93
0.510476	1453.62		0.510476	1427.88		0.510476	1000.36		0.510476	1034.99		0.510476	1071.98		0.510476	1105.17
0.51337	1439.22		0.51337	1414.69		0.51337	999.969		0.51337	1034.48		0.51337	1071.35		0.51337	1104.41
0.516264	1425.03		0.516264	1401.86		0.516264	999.579		0.516264	1033.98		0.516264	1070.71		0.516264	1103.65
0.519158	1411.14		0.519158	1389.4		0.519158	999.188		0.519158	1033.47		0.519158	1070.07		0.519158	1102.89
0.522051	1397.55		0.522051	1377.24		0.522051	998.796		0.522051	1032.97		0.522051	1069.43		0.522051	1102.14
0.524945	1384.25		0.524945	1365.35		0.524945	998.404		0.524945	1032.46		0.524945	1068.8		0.524945	1101.38
0.524945	1384.25		0.524945	1365.35		0.524945	998.404		0.524945	1032.46		0.524945	1068.8		0.524945	1101.38
0.527839	1371.25		0.527839	1353.75		0.527839	998.012		0.527839	1031.96		0.527839	1068.16		0.527839	1100.63
0.530733	1358.58		0.530733	1342.46		0.530733	997.619		0.530733	1031.45		0.530733	1067.53		0.530733	1099.88
0.533627	1346.22		0.533627	1331.48		0.533627	997.225		0.533627	1030.95		0.533627	1066.89		0.533627	1099.14
0.536521	1334.17		0.536521	1320.8		0.536521	996.831		0.536521	1030.45		0.536521	1066.26		0.536521	1098.39
0.539415	1322.46		0.539415	1310.43		0.539415	996.436		0.539415	1029.94		0.539415	1065.63		0.539415	1097.65
0.542309	1311.06		0.542309	1300.36		0.542309	996.042		0.542309	1029.44		0.542309	1065		0.542309	1096.91
0.545203	1299.96		0.545203	1290.59		0.545203	995.646		0.545203	1028.93		0.545203	1064.37		0.545203	1096.17
0.548096	1289.18		0.548096	1281.11		0.548096	995.25		0.548096	1028.43		0.548096	1063.74		0.548096	1095.44
0.55099	1278.72		0.55099	1271.92		0.55099	994.854		0.55099	1027.92		0.55099	1063.12		0.55099	1094.71
0.553884	1268.56		0.553884	1263.02		0.553884	994.458		0.553884	1027.42		0.553884	1062.49		0.553884	1093.98
0.556778	1258.67		0.556778	1254.39		0.556778	994.061		0.556778	1026.92		0.556778	1061.87		0.556778	1093.25
0.559672	1249.09		0.559672	1246.06		0.559672	993.664		0.559672	1026.42		0.559672	1061.25		0.559672	1092.52
0.562566	1239.83		0.562566	1238		0.562566	993.266		0.562566	1025.91		0.562566	1060.63		0.562566	1091.8
0.56546	1230.85		0.56546	1230.21		0.56546	992.868		0.56546	1025.41		0.56546	1060.01		0.56546	1091.08
0.568354	1222.14		0.568354	1222.67		0.568354	992.47		0.568354	1024.91		0.568354	1059.4		0.568354	1090.36
0.571248	1213.71		0.571248	1215.37		0.571248	992.072		0.571248	1024.41		0.571248	1058.78		0.571248	1089.65
0.574142	1205.57		0.574142	1208.29		0.574142	991.673		0.574142	1023.91		0.574142	1058.17		0.574142	1088.94
0.577035	1197.71		0.577035	1201.46		0.577035	991.274		0.577035	1023.41		0.577035	1057.56		0.577035	1088.23
0.579929	1190.12		0.579929	1194.86		0.579929	990.875		0.579929	1022.91		0.579929	1056.95		0.579929	1087.52
0.582823	1182.77		0.582823	1188.49		0.582823	990.476		0.582823	1022.41		0.582823	1056.34		0.582823	1086.82
0.585717	1175.64		0.585717	1182.32		0.585717	990.077		0.585717	1021.92		0.585717	1055.73		0.585717	1086.11
0.588611	1168.75		0.588611	1176.36		0.588611	989.677		0.588611	1021.42		0.588611	1055.13		0.588611	1085.42
0.591505	1162.13		0.591505	1170.58		0.591505	989.278		0.591505	1020.93		0.591505	1054.53		0.591505	1084.72
0.594399	1155.75		0.594399	1164.99		0.594399	988.879		0.594399	1020.43		0.594399	1053.93		0.594399	1084.03
0.597293	1149.6		0.597293	1159.58		0.597293	988.479		0.597293	1019.94		0.597293	1053.33		0.597293	1083.34
0.600186	1143.64		0.600186	1154.37		0.600186	988.08		0.600186	1019.44		0.600186	1052.73		0.600186	1082.65
0.60308	1137.86		0.60308	1149.35		0.60308	987.68		0.60308	1018.95		0.60308	1052.14		0.60308	1081.96
0.605974	1132.26		0.605974	1144.49		0.605974	987.281		0.605974	1018.46		0.605974	1051.54		0.605974	1081.28
0.608868	1126.84		0.608868	1139.79		0.608868	986.882		0.608868	1017.97		0.608868	1050.95		0.608868	1080.6
0.611762	1121.64		0.611762	1135.25		0.611762	986.483		0.611762	1017.48		0.611762	1050.36		0.611762	1079.93
0.614656	1116.64		0.614656	1130.85		0.614656	986.084		0.614656	1017		0.614656	1049.78		0.614656	1079.25
0.61755	1111.83		0.61755	1126.58		0.61755	985.686		0.61755	1016.51		0.61755	1049.2		0.61755	1078.58
0.620444	1107.19		0.620444	1122.44		0.620444	985.288		0.620444	1016.02		0.620444	1048.61		0.620444	1077.91
0.623338	1102.71		0.623338	1118.42		0.623338	984.89		0.623338	1015.54		0.623338	1048.03		0.623338	1077.25
0.626231	1098.36		0.626231	1114.54		0.626231	984.492		0.626231	1015.06		0.626231	1047.46		0.626231	1076.59
0.629125	1094.17		0.629125	1110.78		0.629125	984.094		0.629125	1014.58		0.629125	1046.88		0.629125	1075.93
0.632019	1090.1		0.632019	1107.16		0.632019	983.698		0.632019	1014.1		0.632019	1046.31		0.632019	1075.27
0.634913	1086.15		0.634913	1103.65		0.634913	983.301		0.634913	1013.62		0.634913	1045.74		0.634913	1074.61
0.637807	1082.33		0.637807	1100.25		0.637807	982.905		0.637807	1013.14		0.637807	1045.17		0.637807	1073.96
0.640701	1078.64		0.640701	1096.96		0.640701	982.509		0.640701	1012.66		0.640701	1044.6		0.640701	1073.31
0.643595	1075.08		0.643595	1093.76		0.643595	982.114		0.643595	1012.19		0.643595	1044.04		0.643595	1072.67
0.643595	1075.08		0.643595	1093.76		0.643595	982.114		0.643595	1012.19		0.643595	1044.04		0.643595	1072.67
0.646489	1071.63		0.646489	1090.64		0.646489	981.72		0.646489	1011.72		0.646489	1043.48		0.646489	1072.03
0.649383	1068.31		0.649383	1087.62		0.649383	981.326		0.649383	1011.24		0.649383	1042.92		0.649383	1071.38
0.652277	1065.09		0.652277	1084.68		0.652277	980.932		0.652277	1010.77		0.652277	1042.36		0.652277	1070.75
0.65517	1061.98		0.65517	1081.83		0.65517	980.54		0.65517	1010.31		0.65517	1041.81		0.65517	1070.11
0.658064	1058.97		0.658064	1079.06		0.658064	980.148		0.658064	1009.84		0.658064	1041.25		0.658064	1069.48
0.660958	1056.06		0.660958	1076.37		0.660958	979.757		0.660958	1009.37		0.660958	1040.7		0.660958	1068.85
0.663852	1053.25		0.663852	1073.76		0.663852	979.366		0.663852	1008.91		0.663852	1040.15		0.663852	1068.22
0.666746	1050.53		0.666746	1071.23		0.666746	978.977		0.666746	1008.45		0.666746	1039.61		0.666746	1067.59
0.66964	1047.89		0.66964	1068.76		0.66964	978.588		0.66964	1007.99		0.66964	1039.06		0.66964	1066.97
0.672534	1045.35		0.672534	1066.37		0.672534	978.2		0.672534	1007.53		0.672534	1038.52		0.672534	1066.35
0.675428	1042.88		0.675428	1064.05		0.675428	977.813		0.675428	1007.07		0.675428	1037.98		0.675428	1065.73
0.678322	1040.49		0.678322	1061.79		0.678322	977.426		0.678322	1006.62		0.678322	1037.44		0.678322	1065.11
0.681215	1038.19		0.681215	1059.59		0.681215	977.041		0.681215	1006.16		0.681215	1036.91		0.681215	1064.5
0.684109	1035.95		0.684109	1057.45		0.684109	976.657		0.684109	1005.71		0.684109	1036.37		0.684109	1063.88
0.687003	1033.79		0.687003	1055.37		0.687003	976.273		0.687003	1005.26		0.687003	1035.84		0.687003	1063.27
0.689897	1031.69		0.689897	1053.35		0.689897	975.891		0.689897	1004.81		0.689897	1035.31		0.689897	1062.66
0.692791	1029.66		0.692791	1051.37		0.692791	975.51		0.692791	1004.36		0.692791	1034.78		0.692791	1062.05
0.695685	1027.69		0.695685	1049.45		0.695685	975.129		0.695685	1003.91		0.695685	1034.25		0.695685	1061.44
0.698579	1025.78		0.698579	1047.58		0.698579	974.75		0.698579	1003.47		0.698579	1033.72		0.698579	1060.84
0.701473	1023.92		0.701473	1045.75		0.701473	974.372		0.701473	1003.02		0.701473	1033.19		0.701473	1060.23
0.704367	1022.11		0.704367	1043.96		0.704367	973.994		0.704367	1002.58		0.704367	1032.67		0.704367	1059.62
0.70726	1020.35		0.70726	1042.22		0.70726	973.618		0.70726	1002.13		0.70726	1032.15		0.70726	1059.02
0.710154	1018.64		0.710154	1040.52		0.710154	973.242		0.710154	1001.69		0.710154	1031.62		0.710154	1058.41
0.713048	1016.98		0.713048	1038.85		0.713048	972.867		0.713048	1001.25		0.713048	1031.1		0.713048	1057.81
0.715942	1015.36		0.715942	1037.22		0.715942	972.493		0.715942	1000.81		0.715942	1030.57		0.715942	1057.2
0.715942	1015.36		0.715942	1037.22		0.715942	972.493		0.715942	1000.81		0.715942	1030.57		0.715942	1057.2
0.718836	1013.79		0.718836	1035.63		0.718836	972.12		0.718836	1000.37		0.718836	1030.05		0.718836	1056.59
0.72173	1012.25		0.72173	1034.07		0.72173	971.747		0.72173	999.931		0.72173	1029.53		0.72173	1055.98
0.724624	1010.76		0.724624	1032.54		0.724624	971.374		0.724624	999.491		0.724624	1029		0.724624	1055.37
0.727518	1009.31		0.727518	1031.04		0.727518	971.002		0.727518	999.05		0.727518	1028.47		0.727518	1054.75
0.730412	1007.89		0.730412	1029.57		0.730412	970.63		0.730412	998.608		0.730412	1027.94		0.730412	1054.14
0.733305	1006.5		0.733305	1028.13		0.733305	970.258		0.733305	998.165		0.733305	1027.41		0.733305	1053.52
0.736199	1005.15		0.736199	1026.72		0.736199	969.885		0.736199	997.721		0.736199	1026.88		0.736199	1052.89
0.739093	1003.82		0.739093	1025.33		0.739093	969.512		0.739093	997.274		0.739093	1026.34		0.739093	1052.26
0.741987	1002.52		0.741987	1023.96		0.741987	969.137		0.741987	996.823		0.741987	1025.79		0.741987	1051.62
0.744881	1001.25		0.744881	1022.61		0.744881	968.761		0.744881	996.369		0.744881	1025.24		0.744881	1050.97
0.747775	1000		0.747775	1021.28		0.747775	968.382		0.747775	995.911		0.747775	1024.69		0.747775	1050.31
0.750669	998.769		0.750669	1019.96		0.750669	968.001		0.750669	995.446		0.750669	1024.12		0.750669	1049.64
0.753563	997.556		0.753563	1018.66		0.753563	967.616		0.753563	994.974		0.753563	1023.54		0.753563	1048.96
0.756457	996.358		0.756457	1017.37		0.756457	967.226		0.756457	994.494		0.756457	1022.95		0.756457	1048.27
0.75935	995.173		0.75935	1016.08		0.75935	966.83		0.75935	994.004		0.75935	1022.35		0.75935	1047.56
0.762244	993.997		0.762244	1014.8		0.762244	966.427		0.762244	993.503		0.762244	1021.73		0.762244	1046.82
0.765138	992.828		0.765138	1013.51		0.765138	966.016		0.765138	992.989		0.765138	1021.1		0.765138	1046.07
0.768032	991.661		0.768032	1012.22		0.768032	965.594		0.768032	992.459		0.768032	1020.44		0.768032	1045.29
0.770926	990.494		0.770926	1010.93		0.770926	965.162		0.770926	991.913		0.770926	1019.76		0.770926	1044.49
0.77382	989.323		0.77382	1009.62		0.77382	964.716		0.77382	991.347		0.77382	1019.06		0.77382	1043.65
0.776714	988.144		0.776714	1008.29		0.776714	964.256		0.776714	990.762		0.776714	1018.33		0.776714	1042.78
0.779608	986.954		0.779608	1006.95		0.779608	963.779		0.779608	990.154		0.779608	1017.57		0.779608	1041.88
0.782502	985.749		0.782502	1005.58		0.782502	963.286		0.782502	989.522		0.782502	1016.78		0.782502	1040.94
0.785396	984.528		0.785396	1004.19		0.785396	962.773		0.785396	988.864		0.785396	1015.95		0.785396	1039.95
0.788289	983.287		0.788289	1002.76		0.788289	962.241		0.788289	988.181		0.788289	1015.09		0.788289	1038.93
0.791183	982.026		0.791183	1001.32		0.791183	961.688		0.791183	987.469		0.791183	1014.2		0.791183	1037.86
0.794077	980.743		0.794077	999.845		0.794077	961.113		0.794077	986.728		0.794077	1013.26		0.794077	1036.74
0.796971	979.442		0.796971	998.352		0.796971	960.515		0.796971	985.956		0.796971	1012.29		0.796971	1035.57
0.799865	978.124		0.799865	996.84		0.799865	959.891		0.799865	985.152		0.799865	1011.27		0.799865	1034.36
0.799865	978.124		0.799865	996.84		0.799865	959.891		0.799865	985.152		0.799865	1011.27		0.799865	1034.36
0.802759	976.792		0.802759	995.315		0.802759	959.241		0.802759	984.313		0.802759	1010.21		0.802759	1033.09
0.805653	975.451		0.805653	993.78		0.805653	958.563		0.805653	983.439		0.805653	1009.1		0.805653	1031.77
0.808547	974.103		0.808547	992.236		0.808547	957.853		0.808547	982.527		0.808547	1007.96		0.808547	1030.41
0.811441	972.752		0.811441	990.685		0.811441	957.11		0.811441	981.575		0.811441	1006.76		0.811441	1028.99
0.814334	971.4		0.814334	989.129		0.814334	956.33		0.814334	980.581		0.814334	1005.52		0.814334	1027.51
0.817228	970.047		0.817228	987.566		0.817228	955.511		0.817228	979.541		0.817228	1004.22		0.817228	1025.99
0.820122	968.696		0.820122	985.996		0.820122	954.649		0.820122	978.455		0.820122	1002.88		0.820122	1024.41
0.823016	967.345		0.823016	984.418		0.823016	953.741		0.823016	977.319		0.823016	1001.48		0.823016	1022.78
0.82591	965.995		0.82591	982.83		0.82591	952.784		0.82591	976.133		0.82591	1000.04		0.82591	1021.1
0.828804	964.646		0.828804	981.233		0.828804	951.775		0.828804	974.893		0.828804	998.542		0.828804	1019.38
0.831698	963.298		0.831698	979.627		0.831698	950.711		0.831698	973.6		0.831698	996.994		0.831698	1017.6
0.834592	961.952		0.834592	978.011		0.834592	949.59		0.834592	972.253		0.834592	995.397		0.834592	1015.78
0.837486	960.607		0.837486	976.388		0.837486	948.412		0.837486	970.853		0.837486	993.754		0.837486	1013.92
0.840379	959.268		0.840379	974.759		0.840379	947.176		0.840379	969.401		0.840379	992.068		0.840379	1012.02
0.843273	957.935		0.843273	973.128		0.843273	945.883		0.843273	967.9		0.843273	990.344		0.843273	1010.1
0.846167	956.612		0.846167	971.501		0.846167	944.536		0.846167	966.355		0.846167	988.587		0.846167	1008.15
0.849061	955.303		0.849061	969.88		0.849061	943.139		0.849061	964.772		0.849061	986.806		0.849061	1006.19
0.851955	954.013		0.851955	968.274		0.851955	941.698		0.851955	963.158		0.851955	985.008		0.851955	1004.22
0.854849	952.747		0.854849	966.69		0.854849	940.222		0.854849	961.523		0.854849	983.206		0.854849	1002.26
0.857743	951.513		0.857743	965.137		0.857743	938.721		0.857743	959.879		0.857743	981.411		0.857743	1000.32
0.860637	950.319		0.860637	963.628		0.860637	937.21		0.860637	958.241		0.860637	979.639		0.860637	998.421
0.863531	949.178		0.863531	962.176		0.863531	935.71		0.863531	956.631		0.863531	977.912		0.863531	996.576
0.866424	948.106		0.866424	960.806		0.866424	934.248		0.866424	955.076		0.866424	976.257		0.866424	994.818
0.869318	947.129		0.869318	959.548		0.869318	932.867		0.869318	953.62		0.869318	974.719		0.869318	993.191
0.872212	946.288		0.872212	958.459		0.872212	931.635		0.872212	952.331		0.872212	973.369		0.872212	991.769
0.875106	945.654		0.875106	957.63		0.875106	930.669		0.875106	951.331		0.875106	972.328		0.875106	990.678
0.878	945.403		0.878	957.298		0.878	930.271		0.878	950.922		0.878	971.905		0.878	990.236

## Sheet: Axial Velocity
SN 0			SN 0.2			SN 0.4			SN 0.6			SN 0.8			SN 1
Axial distance	velocity		Axial distance	velocity		Axial distance	velocity		Axial distance	velocity		Axial distance	velocity		Axial distance	velocity
0.00115113	13.9485		0.00115113	14.0245		0.00115113	13.8193		0.00115113	13.341		0.00115113	13.1597		0.00115113	13.1046
0.00404502	13.9671		0.00404502	14.0177		0.00404502	13.647		0.00404502	13.0103		0.00404502	12.8059		0.00404502	12.7532
0.00693891	13.9705		0.00693891	13.9911		0.00693891	13.4333		0.00693891	12.6369		0.00693891	12.4131		0.00693891	12.3549
0.0098328	13.9536		0.0098328	13.94		0.0098328	13.1787		0.0098328	12.2101		0.0098328	11.9607		0.0098328	11.8911
0.0127267	13.9192		0.0127267	13.866		0.0127267	12.8889		0.0127267	11.7271		0.0127267	11.4378		0.0127267	11.3545
0.0156206	13.8721		0.0156206	13.7746		0.0156206	12.5677		0.0156206	11.1884		0.0156206	10.8461		0.0156206	10.7492
0.0185145	13.8144		0.0185145	13.6692		0.0185145	12.2147		0.0185145	10.5953		0.0185145	10.1932		0.0185145	10.0884
0.0214084	13.7471		0.0214084	13.5511		0.0214084	11.8336		0.0214084	9.95256		0.0214084	9.49228		0.0214084	9.39504
0.0243023	13.6729		0.0243023	13.4254		0.0243023	11.4303		0.0243023	9.27003		0.0243023	8.76347		0.0243023	8.69512
0.0271961	13.5965		0.0271961	13.2968		0.0271961	11.0099		0.0271961	8.56005		0.0271961	8.02983		0.0271961	8.01096
0.03009	13.5218		0.03009	13.1678		0.03009	10.5765		0.03009	7.83636		0.03009	7.31308		0.03009	7.35952
0.0329839	13.4499		0.0329839	13.0421		0.0329839	10.1336		0.0329839	7.11363		0.0329839	6.63017		0.0329839	6.75188
0.0358778	13.3812		0.0358778	12.9196		0.0358778	9.68387		0.0358778	6.40494		0.0358778	5.99045		0.0358778	6.19373
0.0387717	13.3167		0.0387717	12.8006		0.0387717	9.22976		0.0387717	5.71973		0.0387717	5.39491		0.0387717	5.68467
0.0416656	13.257		0.0416656	12.6871		0.0416656	8.7735		0.0416656	5.06263		0.0416656	4.83852		0.0416656	5.21778
0.0445595	13.2024		0.0445595	12.5802		0.0445595	8.31663		0.0445595	4.43303		0.0445595	4.31339		0.0445595	4.78347
0.0474534	13.1527		0.0474534	12.4792		0.0474534	7.85926		0.0474534	3.82897		0.0474534	3.80942		0.0474534	4.37252
0.0503473	13.1077		0.0503473	12.3831		0.0503473	7.40152		0.0503473	3.25131		0.0503473	3.3192		0.0503473	3.97534
0.0532412	13.0674		0.0532412	12.2916		0.0532412	6.94548		0.0532412	2.70361		0.0532412	2.84019		0.0532412	3.5834
0.056135	13.0323		0.056135	12.2042		0.056135	6.49273		0.056135	2.19177		0.056135	2.37472		0.056135	3.19151
0.0590289	13.0021		0.0590289	12.12		0.0590289	6.04225		0.0590289	1.72223		0.0590289	1.93086		0.0590289	2.79699
0.0619228	12.9765		0.0619228	12.0385		0.0619228	5.59233		0.0619228	1.29643		0.0619228	1.51577		0.0619228	2.40176
0.0648167	12.9551		0.0648167	11.9595		0.0648167	5.14123		0.0648167	0.89339		0.0648167	1.12475		0.0648167	2.01326
0.0677106	12.9373		0.0677106	11.8825		0.0677106	4.68686		0.0677106	0.489752		0.0677106	0.733103		0.0677106	1.64005
0.0706045	12.9222		0.0706045	11.8072		0.0706045	4.22802		0.0706045	0.0886654		0.0706045	0.326335		0.0706045	1.28616
0.0734984	12.9095		0.0734984	11.7336		0.0734984	3.76375		0.0734984	-0.275417		0.0734984	-0.0749325		0.0734984	0.936555
0.0763923	12.8989		0.0763923	11.6619		0.0763923	3.2941		0.0763923	-0.56193		0.0763923	-0.426429		0.0763923	0.57367
0.0792862	12.8898		0.0792862	11.592		0.0792862	2.82375		0.0792862	-0.764672		0.0792862	-0.695625		0.0792862	0.197044
0.0821801	12.8823		0.0821801	11.5244		0.0821801	2.36317		0.0821801	-0.905521		0.0821801	-0.889525		0.0821801	-0.169339
0.085074	12.8757		0.085074	11.4592		0.085074	1.926		0.085074	-1.0104		0.085074	-1.0343		0.085074	-0.485001
0.085074	12.8757		0.085074	11.4592		0.085074	1.926		0.085074	-1.0104		0.085074	-1.0343		0.085074	-0.485001
0.0879678	12.8697		0.0879678	11.3965		0.0879678	1.52069		0.0879678	-1.09568		0.0879678	-1.15127		0.0879678	-0.729178
0.0908617	12.8642		0.0908617	11.3365		0.0908617	1.14404		0.0908617	-1.17001		0.0908617	-1.25143		0.0908617	-0.909706
0.0937556	12.8592		0.0937556	11.2792		0.0937556	0.777073		0.0937556	-1.23825		0.0937556	-1.34046		0.0937556	-1.04809
0.0966495	12.8548		0.0966495	11.2244		0.0966495	0.410006		0.0966495	-1.30323		0.0966495	-1.42173		0.0966495	-1.16164
0.0995434	12.8508		0.0995434	11.1717		0.0995434	0.0516967		0.0995434	-1.36659		0.0995434	-1.49731		0.0995434	-1.25978
0.102437	12.8474		0.102437	11.1208		0.102437	-0.279287		0.102437	-1.42932		0.102437	-1.5685		0.102437	-1.34725
0.105331	12.8445		0.105331	11.0717		0.105331	-0.559199		0.105331	-1.49202		0.105331	-1.63615		0.105331	-1.42638
0.108225	12.8422		0.108225	11.0245		0.108225	-0.775608		0.108225	-1.55499		0.108225	-1.70084		0.108225	-1.49866
0.111119	12.8403		0.111119	10.9791		0.111119	-0.929297		0.111119	-1.61832		0.111119	-1.7629		0.111119	-1.56517
0.114013	12.8391		0.114013	10.9353		0.114013	-1.03199		0.114013	-1.68192		0.114013	-1.82249		0.114013	-1.62669
0.116907	12.839		0.116907	10.8929		0.116907	-1.10031		0.116907	-1.7456		0.116907	-1.87972		0.116907	-1.6838
0.119801	12.8396		0.119801	10.8519		0.119801	-1.14871		0.119801	-1.80905		0.119801	-1.9346		0.119801	-1.73681
0.122695	12.841		0.122695	10.8121		0.122695	-1.18666		0.122695	-1.872		0.122695	-1.98699		0.122695	-1.78589
0.125588	12.843		0.125588	10.7736		0.125588	-1.22003		0.125588	-1.93415		0.125588	-2.03673		0.125588	-1.83124
0.128482	12.8455		0.128482	10.736		0.128482	-1.25246		0.128482	-1.99512		0.128482	-2.08368		0.128482	-1.87296
0.131376	12.8486		0.131376	10.6994		0.131376	-1.28596		0.131376	-2.05458		0.131376	-2.12768		0.131376	-1.91107
0.13427	12.8521		0.13427	10.6638		0.13427	-1.32159		0.13427	-2.11219		0.13427	-2.16861		0.13427	-1.94557
0.137164	12.8562		0.137164	10.6293		0.137164	-1.35996		0.137164	-2.16766		0.137164	-2.20637		0.137164	-1.97647
0.140058	12.8607		0.140058	10.5958		0.140058	-1.4014		0.140058	-2.22071		0.140058	-2.24088		0.140058	-2.0038
0.142952	12.8656		0.142952	10.5628		0.142952	-1.44597		0.142952	-2.27112		0.142952	-2.27208		0.142952	-2.02757
0.145846	12.871		0.145846	10.5304		0.145846	-1.49357		0.145846	-2.31867		0.145846	-2.29992		0.145846	-2.04785
0.14874	12.8767		0.14874	10.4987		0.14874	-1.54396		0.14874	-2.36321		0.14874	-2.32439		0.14874	-2.0647
0.151633	12.8827		0.151633	10.4679		0.151633	-1.59685		0.151633	-2.40458		0.151633	-2.34548		0.151633	-2.07819
0.154527	12.8889		0.154527	10.4375		0.154527	-1.65189		0.154527	-2.44267		0.154527	-2.36323		0.154527	-2.08845
0.157421	12.8954		0.157421	10.4071		0.157421	-1.70868		0.157421	-2.47739		0.157421	-2.37765		0.157421	-2.09543
0.160315	12.902		0.160315	10.3775		0.160315	-1.7668		0.160315	-2.50868		0.160315	-2.3888		0.160315	-2.09942
0.163209	12.9082		0.163209	10.349		0.163209	-1.82581		0.163209	-2.53648		0.163209	-2.39665		0.163209	-2.10064
0.166103	12.9144		0.166103	10.3214		0.166103	-1.88526		0.166103	-2.56076		0.166103	-2.40141		0.166103	-2.09866
0.166103	12.9144		0.166103	10.3214		0.166103	-1.88526		0.166103	-2.56076		0.166103	-2.40141		0.166103	-2.09866
0.168997	12.9214		0.168997	10.2941		0.168997	-1.94469		0.168997	-2.58153		0.168997	-2.40332		0.168997	-2.09405
0.171891	12.9288		0.171891	10.2673		0.171891	-2.00367		0.171891	-2.5988		0.171891	-2.40193		0.171891	-2.08705
0.174785	12.9361		0.174785	10.2408		0.174785	-2.06176		0.174785	-2.61261		0.174785	-2.39766		0.174785	-2.07741
0.177678	12.9433		0.177678	10.2148		0.177678	-2.11856		0.177678	-2.62293		0.177678	-2.39081		0.177678	-2.06548
0.180572	12.9503		0.180572	10.1892		0.180572	-2.17371		0.180572	-2.62986		0.180572	-2.38114		0.180572	-2.0513
0.183466	12.9573		0.183466	10.1638		0.183466	-2.22688		0.183466	-2.6336		0.183466	-2.36894		0.183466	-2.03504
0.18636	12.9644		0.18636	10.1388		0.18636	-2.27778		0.18636	-2.63403		0.18636	-2.35427		0.18636	-2.0168
0.189254	12.9713		0.189254	10.1142		0.189254	-2.32614		0.189254	-2.63113		0.189254	-2.33726		0.189254	-1.99673
0.192148	12.9781		0.192148	10.0902		0.192148	-2.37175		0.192148	-2.62524		0.192148	-2.31802		0.192148	-1.97493
0.195042	12.985		0.195042	10.0667		0.195042	-2.41441		0.195042	-2.61646		0.195042	-2.29669		0.195042	-1.95153
0.197936	12.992		0.197936	10.0437		0.197936	-2.45395		0.197936	-2.60475		0.197936	-2.27337		0.197936	-1.92665
0.20083	12.9993		0.20083	10.0211		0.20083	-2.49025		0.20083	-2.59029		0.20083	-2.24818		0.20083	-1.9004
0.203723	13.0067		0.203723	9.99883		0.203723	-2.5232		0.203723	-2.57318		0.203723	-2.22126		0.203723	-1.87291
0.206617	13.0142		0.206617	9.97685		0.206617	-2.5527		0.206617	-2.55356		0.206617	-2.19271		0.206617	-1.84428
0.209511	13.0216		0.209511	9.95517		0.209511	-2.5787		0.209511	-2.53154		0.209511	-2.16266		0.209511	-1.81462
0.212405	13.0289		0.212405	9.93376		0.212405	-2.60116		0.212405	-2.50726		0.212405	-2.13123		0.212405	-1.78403
0.215299	13.0361		0.215299	9.91251		0.215299	-2.62004		0.215299	-2.48083		0.215299	-2.09852		0.215299	-1.75262
0.215299	13.0361		0.215299	9.91251		0.215299	-2.62004		0.215299	-2.48083		0.215299	-2.09852		0.215299	-1.75262
0.218193	13.043		0.218193	9.89129		0.218193	-2.63531		0.218193	-2.45238		0.218193	-2.06465		0.218193	-1.72048
0.221087	13.0496		0.221087	9.87002		0.221087	-2.64702		0.221087	-2.42205		0.221087	-2.02972		0.221087	-1.68771
0.223981	13.0559		0.223981	9.84873		0.223981	-2.65516		0.223981	-2.38995		0.223981	-1.99385		0.223981	-1.65439
0.226875	13.0619		0.226875	9.82751		0.226875	-2.6599		0.226875	-2.35621		0.226875	-1.95713		0.226875	-1.62061
0.229768	13.0679		0.229768	9.80638		0.229768	-2.66133		0.229768	-2.32096		0.229768	-1.91967		0.229768	-1.58646
0.232662	13.0739		0.232662	9.78524		0.232662	-2.65903		0.232662	-2.28432		0.232662	-1.88155		0.232662	-1.552
0.235556	13.08		0.235556	9.76402		0.235556	-2.6535		0.235556	-2.2464		0.235556	-1.84288		0.235556	-1.51731
0.23845	13.0859		0.23845	9.74273		0.23845	-2.64495		0.23845	-2.20732		0.23845	-1.80373		0.23845	-1.48247
0.241344	13.0917		0.241344	9.72139		0.241344	-2.63317		0.241344	-2.1672		0.241344	-1.7642		0.241344	-1.44754
0.244238	13.0972		0.244238	9.70001		0.244238	-2.6184		0.244238	-2.12614		0.244238	-1.72436		0.244238	-1.41258
0.247132	13.1024		0.247132	9.67855		0.247132	-2.60074		0.247132	-2.08425		0.247132	-1.68429		0.247132	-1.37764
0.250026	13.1075		0.250026	9.65693		0.250026	-2.58031		0.250026	-2.04163		0.250026	-1.64406		0.250026	-1.34279
0.25292	13.1123		0.25292	9.63505		0.25292	-2.55724		0.25292	-1.99837		0.25292	-1.60374		0.25292	-1.30807
0.255814	13.1169		0.255814	9.61291		0.255814	-2.53166		0.255814	-1.95459		0.255814	-1.56339		0.255814	-1.27354
0.258707	13.1211		0.258707	9.59064		0.258707	-2.5037		0.258707	-1.91035		0.258707	-1.52308		0.258707	-1.23922
0.261601	13.125		0.261601	9.56829		0.261601	-2.4735		0.261601	-1.86575		0.261601	-1.48287		0.261601	-1.20518
0.264495	13.1286		0.264495	9.54576		0.264495	-2.44119		0.264495	-1.82087		0.264495	-1.4428		0.264495	-1.17143
0.267389	13.132		0.267389	9.52304		0.267389	-2.40692		0.267389	-1.7758		0.267389	-1.40293		0.267389	-1.13802
0.270283	13.1351		0.270283	9.5004		0.270283	-2.37081		0.270283	-1.73059		0.270283	-1.36331		0.270283	-1.10498
0.273177	13.1379		0.273177	9.47796		0.273177	-2.33302		0.273177	-1.68533		0.273177	-1.32398		0.273177	-1.07233
0.276071	13.1404		0.276071	9.4556		0.276071	-2.29366		0.276071	-1.64008		0.276071	-1.28498		0.276071	-1.0401
0.278965	13.1425		0.278965	9.43318		0.278965	-2.25287		0.278965	-1.5949		0.278965	-1.24635		0.278965	-1.00832
0.281859	13.1439		0.281859	9.41062		0.281859	-2.21079		0.281859	-1.54986		0.281859	-1.20812		0.281859	-0.977002
0.284752	13.1445		0.284752	9.38791		0.284752	-2.16753		0.284752	-1.505		0.284752	-1.17033		0.284752	-0.946163
0.287646	13.1444		0.287646	9.36508		0.287646	-2.12323		0.287646	-1.46038		0.287646	-1.13301		0.287646	-0.91582
0.29054	13.1438		0.29054	9.34202		0.29054	-2.078		0.29054	-1.41605		0.29054	-1.09617		0.29054	-0.885987
0.293434	13.1426		0.293434	9.31871		0.293434	-2.03195		0.293434	-1.37205		0.293434	-1.05985		0.293434	-0.856674
0.296328	13.1407		0.296328	9.29533		0.296328	-1.9852		0.296328	-1.32843		0.296328	-1.02407		0.296328	-0.82789
0.299222	13.1383		0.299222	9.27181		0.299222	-1.93785		0.299222	-1.28522		0.299222	-0.988844		0.299222	-0.799642
0.302116	13.1351		0.302116	9.24769		0.302116	-1.89		0.302116	-1.24246		0.302116	-0.954189		0.302116	-0.771934
0.30501	13.131		0.30501	9.22275		0.30501	-1.84176		0.30501	-1.20019		0.30501	-0.92012		0.30501	-0.74477
0.307904	13.126		0.307904	9.19709		0.307904	-1.79321		0.307904	-1.15842		0.307904	-0.88665		0.307904	-0.718153
0.310797	13.1201		0.310797	9.17074		0.310797	-1.74444		0.310797	-1.1172		0.310797	-0.853789		0.310797	-0.692081
0.313691	13.1134		0.313691	9.14358		0.313691	-1.69554		0.313691	-1.07654		0.313691	-0.821545		0.313691	-0.666553
0.313691	13.1134		0.313691	9.14358		0.313691	-1.69554		0.313691	-1.07654		0.313691	-0.821545		0.313691	-0.666553
0.316585	13.1058		0.316585	9.11553		0.316585	-1.64658		0.316585	-1.03647		0.316585	-0.789925		0.316585	-0.641568
0.319479	13.0972		0.319479	9.08676		0.319479	-1.59764		0.319479	-0.997006		0.319479	-0.758933		0.319479	-0.617121
0.322373	13.0875		0.322373	9.05746		0.322373	-1.54879		0.322373	-0.95817		0.322373	-0.728573		0.322373	-0.593208
0.325267	13.0769		0.325267	9.02755		0.325267	-1.50009		0.325267	-0.919975		0.325267	-0.698847		0.325267	-0.569822
0.328161	13.0656		0.328161	8.99695		0.328161	-1.45161		0.328161	-0.882437		0.328161	-0.669754		0.328161	-0.546957
0.331055	13.0538		0.331055	8.96574		0.331055	-1.4034		0.331055	-0.845565		0.331055	-0.641294		0.331055	-0.524605
0.333949	13.0415		0.333949	8.93405		0.333949	-1.35551		0.333949	-0.809372		0.333949	-0.613464		0.333949	-0.502757
0.336842	13.0285		0.336842	8.90217		0.336842	-1.30799		0.336842	-0.773863		0.336842	-0.58626		0.336842	-0.481405
0.339736	13.0144		0.339736	8.87058		0.339736	-1.26089		0.339736	-0.739047		0.339736	-0.559677		0.339736	-0.460539
0.34263	12.9992		0.34263	8.83922		0.34263	-1.21425		0.34263	-0.704927		0.34263	-0.533709		0.34263	-0.440148
0.345524	12.9828		0.345524	8.80744		0.345524	-1.16811		0.345524	-0.671506		0.345524	-0.50835		0.345524	-0.420222
0.348418	12.9651		0.348418	8.77478		0.348418	-1.1225		0.348418	-0.638787		0.348418	-0.483591		0.348418	-0.400749
0.351312	12.9462		0.351312	8.74123		0.351312	-1.07745		0.351312	-0.606771		0.351312	-0.459425		0.351312	-0.381718
0.354206	12.9259		0.354206	8.7071		0.354206	-1.033		0.354206	-0.575455		0.354206	-0.435841		0.354206	-0.363118
0.3571	12.9037		0.3571	8.67278		0.3571	-0.989167		0.3571	-0.544838		0.3571	-0.41283		0.3571	-0.344936
0.359994	12.8797		0.359994	8.6383		0.359994	-0.945977		0.359994	-0.514917		0.359994	-0.390381		0.359994	-0.32716
0.362887	12.854		0.362887	8.60359		0.362887	-0.903451		0.362887	-0.485687		0.362887	-0.368483		0.362887	-0.309779
0.365781	12.8269		0.365781	8.56859		0.365781	-0.861605		0.365781	-0.457143		0.365781	-0.347124		0.365781	-0.29278
0.368675	12.7985		0.368675	8.53299		0.368675	-0.820455		0.368675	-0.429279		0.368675	-0.326292		0.368675	-0.27615
0.371569	12.7687		0.371569	8.49673		0.371569	-0.780015		0.371569	-0.402085		0.371569	-0.305973		0.371569	-0.259876
0.374463	12.7368		0.374463	8.45996		0.374463	-0.740295		0.374463	-0.375555		0.374463	-0.286155		0.374463	-0.243947
0.377357	12.7031		0.377357	8.42268		0.377357	-0.701307		0.377357	-0.349679		0.377357	-0.266825		0.377357	-0.228351
0.380251	12.6681		0.380251	8.38501		0.380251	-0.663059		0.380251	-0.324449		0.380251	-0.24797		0.380251	-0.213075
0.383145	12.6317		0.383145	8.34703		0.383145	-0.625557		0.383145	-0.299855		0.383145	-0.229579		0.383145	-0.19811
0.386039	12.593		0.386039	8.30871		0.386039	-0.588804		0.386039	-0.275887		0.386039	-0.211636		0.386039	-0.183444
0.388932	12.5513		0.388932	8.27		0.388932	-0.552804		0.388932	-0.252532		0.388932	-0.194129		0.388932	-0.169065
0.391826	12.5067		0.391826	8.23052		0.391826	-0.517557		0.391826	-0.22978		0.391826	-0.177043		0.391826	-0.154962
0.39472	12.4598		0.39472	8.19029		0.39472	-0.483064		0.39472	-0.207617		0.39472	-0.160366		0.39472	-0.141124
0.397614	12.4104		0.397614	8.14962		0.397614	-0.449322		0.397614	-0.186032		0.397614	-0.144084		0.397614	-0.127541
0.400508	12.3587		0.400508	8.10789		0.400508	-0.41633		0.400508	-0.165011		0.400508	-0.128184		0.400508	-0.114203
0.403402	12.3048		0.403402	8.06466		0.403402	-0.384084		0.403402	-0.144541		0.403402	-0.112652		0.403402	-0.101099
0.403402	12.3048		0.403402	8.06466		0.403402	-0.384084		0.403402	-0.144541		0.403402	-0.112652		0.403402	-0.101099
0.406296	12.2483		0.406296	8.02007		0.406296	-0.35258		0.406296	-0.12461		0.406296	-0.097475		0.406296	-0.0882198
0.40919	12.1888		0.40919	7.97339		0.40919	-0.32181		0.40919	-0.105203		0.40919	-0.0826412		0.40919	-0.0755568
0.412084	12.126		0.412084	7.92459		0.412084	-0.29177		0.412084	-0.0863078		0.412084	-0.0681376		0.412084	-0.0631006
0.414977	12.0606		0.414977	7.87489		0.414977	-0.262452		0.414977	-0.0679098		0.414977	-0.0539518		0.414977	-0.0508426
0.417871	11.993		0.417871	7.82448		0.417871	-0.233847		0.417871	-0.0499956		0.417871	-0.0400717		0.417871	-0.0387744
0.420765	11.9225		0.420765	7.77295		0.420765	-0.205946		0.420765	-0.0325513		0.420765	-0.0264854		0.420765	-0.0268882
0.423659	11.8485		0.423659	7.72052		0.423659	-0.178741		0.423659	-0.0155632		0.423659	-0.0131813		0.423659	-0.0151761
0.426553	11.7717		0.426553	7.66753		0.426553	-0.152222		0.426553	0.000982448		0.426553	-0.000148038		0.426553	-0.0036307
0.429447	11.6908		0.429447	7.61405		0.429447	-0.126377		0.429447	0.0170993		0.429447	0.0126253		0.429447	0.00775507
0.432341	11.6047		0.432341	7.56014		0.432341	-0.101196		0.432341	0.032801		0.432341	0.0251496		0.432341	0.0189881
0.435235	11.5154		0.435235	7.50618		0.435235	-0.0766664		0.435235	0.0481009		0.435235	0.0374351		0.435235	0.0300748
0.438129	11.4242		0.438129	7.45233		0.438129	-0.0527777		0.438129	0.0630123		0.438129	0.0494921		0.438129	0.0410215
0.441023	11.3311		0.441023	7.39812		0.441023	-0.029517		0.441023	0.0775484		0.441023	0.0613303		0.441023	0.0518343
0.443916	11.2358		0.443916	7.34332		0.443916	-0.00687209		0.443916	0.0917221		0.443916	0.0729592		0.443916	0.0625187
0.44681	11.1382		0.44681	7.28831		0.44681	0.01517		0.44681	0.105546		0.44681	0.084388		0.44681	0.0730804
0.449704	11.0391		0.449704	7.23321		0.449704	0.0366222		0.449704	0.119033		0.449704	0.0956256		0.449704	0.0835246
0.452598	10.9391		0.452598	7.17786		0.452598	0.0574976		0.452598	0.132196		0.452598	0.106681		0.452598	0.0938565
0.455492	10.8384		0.455492	7.12206		0.455492	0.0778096		0.455492	0.145046		0.455492	0.117561		0.455492	0.104081
0.458386	10.7369		0.458386	7.06577		0.458386	0.0975715		0.458386	0.157595		0.458386	0.128276		0.458386	0.114202
0.46128	10.6353		0.46128	7.0091		0.46128	0.116797		0.46128	0.169855		0.46128	0.138832		0.46128	0.124225
0.464174	10.5336		0.464174	6.95211		0.464174	0.135499		0.464174	0.181837		0.464174	0.149237		0.464174	0.134154
0.467068	10.4316		0.467068	6.89477		0.467068	0.153692		0.467068	0.193553		0.467068	0.159497		0.467068	0.143993
0.469961	10.3293		0.469961	6.8371		0.469961	0.171389		0.469961	0.205013		0.469961	0.169621		0.469961	0.153745
0.472855	10.2265		0.472855	6.77921		0.472855	0.188603		0.472855	0.216227		0.472855	0.179615		0.472855	0.163416
0.475749	10.1227		0.475749	6.72102		0.475749	0.205348		0.475749	0.227207		0.475749	0.189485		0.475749	0.173007
0.478643	10.0189		0.478643	6.66238		0.478643	0.221637		0.478643	0.237961		0.478643	0.199237		0.478643	0.182524
0.481537	9.91534		0.481537	6.6033		0.481537	0.237484		0.481537	0.248501		0.481537	0.208877		0.481537	0.191969
0.484431	9.81196		0.484431	6.54381		0.484431	0.252901		0.484431	0.258834		0.484431	0.218412		0.484431	0.201346
0.487325	9.70864		0.487325	6.484		0.487325	0.267903		0.487325	0.268971		0.487325	0.227846		0.487325	0.210658
0.490219	9.60532		0.490219	6.42399		0.490219	0.282501		0.490219	0.278919		0.490219	0.237185		0.490219	0.219908
0.493113	9.50206		0.493113	6.36381		0.493113	0.296708		0.493113	0.288689		0.493113	0.246434		0.493113	0.2291
0.496006	9.39904		0.496006	6.30356		0.496006	0.310537		0.496006	0.298288		0.496006	0.255598		0.496006	0.238236
0.4989	9.29631		0.4989	6.24322		0.4989	0.324001		0.4989	0.307725		0.4989	0.264682		0.4989	0.247319
0.501794	9.19375		0.501794	6.18268		0.501794	0.337111		0.501794	0.317007		0.501794	0.273691		0.501794	0.256353
0.504688	9.09154		0.504688	6.12189		0.504688	0.34988		0.504688	0.326142		0.504688	0.282629		0.504688	0.26534
0.507582	8.98989		0.507582	6.06095		0.507582	0.362318		0.507582	0.335138		0.507582	0.2915		0.507582	0.274284
0.510476	8.88868		0.510476	6.00004		0.510476	0.374439		0.510476	0.344001		0.510476	0.30031		0.510476	0.283186
0.51337	8.78781		0.51337	5.93922		0.51337	0.386253		0.51337	0.35274		0.51337	0.309062		0.51337	0.292051
0.516264	8.68746		0.516264	5.87851		0.516264	0.397773		0.516264	0.36136		0.516264	0.317761		0.516264	0.300881
0.519158	8.58785		0.519158	5.81792		0.519158	0.409008		0.519158	0.36987		0.519158	0.326411		0.519158	0.30968
0.522051	8.48883		0.522051	5.75732		0.522051	0.419971		0.522051	0.378275		0.522051	0.335016		0.522051	0.31845
0.524945	8.39026		0.524945	5.69655		0.524945	0.430671		0.524945	0.386583		0.524945	0.343581		0.524945	0.327195
0.524945	8.39026		0.524945	5.69655		0.524945	0.430671		0.524945	0.386583		0.524945	0.343581		0.524945	0.327195
0.527839	8.2921		0.527839	5.63569		0.527839	0.441118		0.527839	0.394797		0.527839	0.352107		0.527839	0.335916
0.530733	8.19438		0.530733	5.57486		0.530733	0.451322		0.530733	0.402926		0.530733	0.360601		0.530733	0.344618
0.533627	8.09711		0.533627	5.51416		0.533627	0.461295		0.533627	0.410974		0.533627	0.369064		0.533627	0.353304
0.536521	8.00035		0.536521	5.45362		0.536521	0.471044		0.536521	0.418948		0.536521	0.377502		0.536521	0.361977
0.539415	7.9042		0.539415	5.39331		0.539415	0.480581		0.539415	0.426853		0.539415	0.385918		0.539415	0.37064
0.542309	7.80866		0.542309	5.33327		0.542309	0.489914		0.542309	0.434695		0.542309	0.394316		0.542309	0.379296
0.545203	7.71376		0.545203	5.27352		0.545203	0.499052		0.545203	0.442479		0.545203	0.402701		0.545203	0.387949
0.548096	7.61958		0.548096	5.2141		0.548096	0.508005		0.548096	0.450212		0.548096	0.411075		0.548096	0.396603
0.55099	7.52614		0.55099	5.15501		0.55099	0.516782		0.55099	0.457897		0.55099	0.419443		0.55099	0.405261
0.553884	7.43343		0.553884	5.09629		0.553884	0.525391		0.553884	0.465542		0.553884	0.427809		0.553884	0.413927
0.556778	7.34143		0.556778	5.03798		0.556778	0.533841		0.556778	0.47315		0.556778	0.436177		0.556778	0.422604
0.559672	7.25025		0.559672	4.98011		0.559672	0.542139		0.559672	0.480728		0.559672	0.444551		0.559672	0.431297
0.562566	7.15991		0.562566	4.92269		0.562566	0.550295		0.562566	0.48828		0.562566	0.452935		0.562566	0.44001
0.56546	7.07036		0.56546	4.86571		0.56546	0.558317		0.56546	0.495812		0.56546	0.461334		0.56546	0.448747
0.568354	6.98156		0.568354	4.80918		0.568354	0.566212		0.568354	0.503329		0.568354	0.469752		0.568354	0.457511
0.571248	6.8936		0.571248	4.7531		0.571248	0.573989		0.571248	0.510835		0.571248	0.478193		0.571248	0.466307
0.574142	6.80653		0.574142	4.69749		0.574142	0.581654		0.574142	0.518338		0.574142	0.486662		0.574142	0.47514
0.577035	6.72033		0.577035	4.64239		0.577035	0.589217		0.577035	0.525841		0.577035	0.495164		0.577035	0.484014
0.579929	6.63495		0.579929	4.58782		0.579929	0.596685		0.579929	0.533351		0.579929	0.503702		0.579929	0.492935
0.582823	6.55035		0.582823	4.53378		0.582823	0.604065		0.582823	0.540872		0.582823	0.512284		0.582823	0.501908
0.585717	6.46653		0.585717	4.48026		0.585717	0.611365		0.585717	0.548411		0.585717	0.520912		0.585717	0.510938
0.588611	6.38356		0.588611	4.42726		0.588611	0.618593		0.588611	0.555972		0.588611	0.529592		0.588611	0.520034
0.591505	6.30156		0.591505	4.37477		0.591505	0.625757		0.591505	0.563563		0.591505	0.538331		0.591505	0.5292
0.594399	6.22047		0.594399	4.32284		0.594399	0.632863		0.594399	0.571187		0.594399	0.547133		0.594399	0.538443
0.597293	6.14022		0.597293	4.2715		0.597293	0.639919		0.597293	0.578853		0.597293	0.556005		0.597293	0.547767
0.600186	6.06077		0.600186	4.22076		0.600186	0.646934		0.600186	0.586565		0.600186	0.564954		0.600186	0.557175
0.60308	5.9821		0.60308	4.17062		0.60308	0.653914		0.60308	0.594331		0.60308	0.573988		0.60308	0.566672
0.605974	5.90423		0.605974	4.12107		0.605974	0.660869		0.605974	0.602156		0.605974	0.583114		0.605974	0.576263
0.608868	5.82726		0.608868	4.0721		0.608868	0.667804		0.608868	0.610047		0.608868	0.592338		0.608868	0.585956
0.611762	5.75126		0.611762	4.02371		0.611762	0.67473		0.611762	0.618011		0.611762	0.601665		0.611762	0.595759
0.614656	5.6762		0.614656	3.9759		0.614656	0.681653		0.614656	0.626056		0.614656	0.611101		0.614656	0.605681
0.61755	5.60206		0.61755	3.92867		0.61755	0.688583		0.61755	0.634189		0.61755	0.620651		0.61755	0.615729
0.620444	5.52877		0.620444	3.88202		0.620444	0.695526		0.620444	0.642421		0.620444	0.630323		0.620444	0.625911
0.623338	5.45632		0.623338	3.83596		0.623338	0.702493		0.623338	0.65076		0.623338	0.640125		0.623338	0.636236
0.626231	5.3847		0.626231	3.79052		0.626231	0.709492		0.626231	0.659215		0.626231	0.650068		0.626231	0.646711
0.629125	5.31392		0.629125	3.74572		0.629125	0.716533		0.629125	0.667794		0.629125	0.66016		0.629125	0.657345
0.632019	5.24397		0.632019	3.70156		0.632019	0.723626		0.632019	0.676502		0.632019	0.670413		0.632019	0.668147
0.634913	5.17483		0.634913	3.65803		0.634913	0.730782		0.634913	0.68535		0.634913	0.680835		0.634913	0.679125
0.637807	5.10656		0.637807	3.61511		0.637807	0.738011		0.637807	0.694343		0.637807	0.691436		0.637807	0.69029
0.640701	5.03919		0.640701	3.5728		0.640701	0.745324		0.640701	0.703495		0.640701	0.702227		0.640701	0.70165
0.643595	4.97271		0.643595	3.53108		0.643595	0.752731		0.643595	0.712817		0.643595	0.713218		0.643595	0.713217
0.643595	4.97271		0.643595	3.53108		0.643595	0.752731		0.643595	0.712817		0.643595	0.713218		0.643595	0.713217
0.646489	4.90708		0.646489	3.48995		0.646489	0.760242		0.646489	0.722322		0.646489	0.724421		0.646489	0.725001
0.649383	4.8423		0.649383	3.44943		0.649383	0.767866		0.649383	0.732023		0.649383	0.735847		0.649383	0.737014
0.652277	4.77836		0.652277	3.40952		0.652277	0.775618		0.652277	0.741932		0.652277	0.747508		0.652277	0.749266
0.65517	4.71528		0.65517	3.37024		0.65517	0.783509		0.65517	0.752061		0.65517	0.759418		0.65517	0.761769
0.658064	4.65306		0.658064	3.33159		0.658064	0.791557		0.658064	0.762425		0.658064	0.77159		0.658064	0.774538
0.660958	4.59172		0.660958	3.29358		0.660958	0.799775		0.660958	0.773038		0.660958	0.784038		0.660958	0.787583
0.663852	4.53125		0.663852	3.25621		0.663852	0.808179		0.663852	0.783915		0.663852	0.796777		0.663852	0.80092
0.666746	4.47165		0.666746	3.21949		0.666746	0.816786		0.666746	0.795074		0.666746	0.809822		0.666746	0.814562
0.66964	4.41294		0.66964	3.1834		0.66964	0.825611		0.66964	0.806529		0.66964	0.82319		0.66964	0.828524
0.672534	4.35511		0.672534	3.14797		0.672534	0.834673		0.672534	0.8183		0.672534	0.836898		0.672534	0.842823
0.675428	4.29816		0.675428	3.1132		0.675428	0.84399		0.675428	0.830406		0.675428	0.850964		0.675428	0.857474
0.678322	4.24211		0.678322	3.07909		0.678322	0.853583		0.678322	0.842865		0.678322	0.865407		0.678322	0.872495
0.681215	4.18694		0.681215	3.04564		0.681215	0.863472		0.681215	0.8557		0.681215	0.880246		0.681215	0.887904
0.684109	4.13268		0.684109	3.01287		0.684109	0.873681		0.684109	0.868933		0.684109	0.895503		0.684109	0.90372
0.687003	4.07933		0.687003	2.98079		0.687003	0.884232		0.687003	0.882586		0.687003	0.9112		0.687003	0.919964
0.689897	4.02688		0.689897	2.94939		0.689897	0.895152		0.689897	0.896687		0.689897	0.927361		0.689897	0.936655
0.692791	3.97535		0.692791	2.91869		0.692791	0.906468		0.692791	0.91126		0.692791	0.94401		0.692791	0.953818
0.695685	3.92475		0.695685	2.88872		0.695685	0.918208		0.695685	0.926335		0.695685	0.961174		0.695685	0.971474
0.698579	3.87509		0.698579	2.85947		0.698579	0.930403		0.698579	0.941942		0.698579	0.97888		0.698579	0.989649
0.701473	3.82638		0.701473	2.83098		0.701473	0.943088		0.701473	0.958112		0.701473	0.997158		0.701473	1.00837
0.704367	3.77864		0.704367	2.80325		0.704367	0.956296		0.704367	0.974881		0.704367	1.01604		0.704367	1.02766
0.70726	3.73189		0.70726	2.77632		0.70726	0.970066		0.70726	0.992283		0.70726	1.03556		0.70726	1.04756
0.710154	3.68616		0.710154	2.7502		0.710154	0.984438		0.710154	1.01036		0.710154	1.05575		0.710154	1.06809
0.713048	3.64147		0.713048	2.72492		0.713048	0.999456		0.713048	1.02915		0.713048	1.07665		0.713048	1.08929
0.715942	3.59787		0.715942	2.70049		0.715942	1.01517		0.715942	1.0487		0.715942	1.0983		0.715942	1.11119
0.715942	3.59787		0.715942	2.70049		0.715942	1.01517		0.715942	1.0487		0.715942	1.0983		0.715942	1.11119
0.718836	3.55538		0.718836	2.67697		0.718836	1.03162		0.718836	1.06906		0.718836	1.12075		0.718836	1.13384
0.72173	3.51405		0.72173	2.65442		0.72173	1.04887		0.72173	1.09028		0.72173	1.14403		0.72173	1.15727
0.724624	3.47392		0.724624	2.63286		0.724624	1.06698		0.724624	1.11241		0.724624	1.16821		0.724624	1.18153
0.727518	3.43504		0.727518	2.61236		0.727518	1.08601		0.727518	1.13552		0.727518	1.19333		0.727518	1.20666
0.730412	3.39744		0.730412	2.59296		0.730412	1.10603		0.730412	1.15966		0.730412	1.21945		0.730412	1.23272
0.733305	3.36119		0.733305	2.57473		0.733305	1.12711		0.733305	1.18491		0.733305	1.24664		0.733305	1.25976
0.736199	3.32639		0.736199	2.55774		0.736199	1.14933		0.736199	1.21135		0.736199	1.27495		0.736199	1.28784
0.739093	3.29314		0.739093	2.54207		0.739093	1.17278		0.739093	1.23905		0.739093	1.30448		0.739093	1.31702
0.741987	3.2615		0.741987	2.52783		0.741987	1.19757		0.741987	1.2681		0.741987	1.33529		0.741987	1.34738
0.744881	3.23157		0.744881	2.5151		0.744881	1.22378		0.744881	1.29861		0.744881	1.36747		0.744881	1.37899
0.747775	3.20349		0.747775	2.50402		0.747775	1.25153		0.747775	1.33067		0.747775	1.40112		0.747775	1.41194
0.750669	3.17738		0.750669	2.49472		0.750669	1.28096		0.750669	1.3644		0.750669	1.43634		0.750669	1.44631
0.753563	3.1534		0.753563	2.48734		0.753563	1.31219		0.753563	1.39993		0.753563	1.47324		0.753563	1.48221
0.756457	3.13172		0.756457	2.48206		0.756457	1.34538		0.756457	1.43741		0.756457	1.51195		0.756457	1.51974
0.75935	3.11254		0.75935	2.47907		0.75935	1.38069		0.75935	1.47697		0.75935	1.55261		0.75935	1.55903
0.762244	3.0961		0.762244	2.47862		0.762244	1.4183		0.762244	1.5188		0.762244	1.59536		0.762244	1.60021
0.765138	3.08266		0.765138	2.48097		0.765138	1.45843		0.765138	1.56308		0.765138	1.64038		0.765138	1.64342
0.768032	3.07249		0.768032	2.4864		0.768032	1.50129		0.768032	1.61003		0.768032	1.68785		0.768032	1.68882
0.770926	3.06593		0.770926	2.49524		0.770926	1.54714		0.770926	1.65986		0.770926	1.73797		0.770926	1.7366
0.77382	3.06343		0.77382	2.50789		0.77382	1.59626		0.77382	1.71284		0.77382	1.79096		0.77382	1.78694
0.776714	3.0654		0.776714	2.52477		0.776714	1.64897		0.776714	1.76924		0.776714	1.84707		0.776714	1.84006
0.779608	3.07231		0.779608	2.54636		0.779608	1.7056		0.779608	1.82937		0.779608	1.90656		0.779608	1.8962
0.782502	3.08474		0.782502	2.57321		0.782502	1.76655		0.782502	1.89357		0.782502	1.96973		0.782502	1.95561
0.785396	3.10334		0.785396	2.60594		0.785396	1.83225		0.785396	1.96222		0.785396	2.0369		0.785396	2.01859
0.788289	3.12878		0.788289	2.64521		0.788289	1.90318		0.788289	2.03574		0.788289	2.10844		0.788289	2.08546
0.791183	3.16185		0.791183	2.69174		0.791183	1.97987		0.791183	2.11458		0.791183	2.18475		0.791183	2.15657
0.794077	3.2034		0.794077	2.74629		0.794077	2.06293		0.794077	2.19926		0.794077	2.26628		0.794077	2.23232
0.796971	3.25434		0.796971	2.80971		0.796971	2.153		0.796971	2.29035		0.796971	2.35352		0.796971	2.31315
0.799865	3.31562		0.799865	2.88287		0.799865	2.25084		0.799865	2.38848		0.799865	2.44702		0.799865	2.39955
0.799865	3.31562		0.799865	2.88287		0.799865	2.25084		0.799865	2.38848		0.799865	2.44702		0.799865	2.39955
0.802759	3.3883		0.802759	2.96676		0.802759	2.35728		0.802759	2.49438		0.802759	2.54741		0.802759	2.49207
0.805653	3.47349		0.805653	3.06245		0.805653	2.47325		0.805653	2.60885		0.805653	2.65538		0.805653	2.59133
0.808547	3.57241		0.808547	3.17111		0.808547	2.59981		0.808547	2.73279		0.808547	2.77172		0.808547	2.69803
0.811441	3.68639		0.811441	3.29409		0.811441	2.73814		0.811441	2.86723		0.811441	2.8973		0.811441	2.81294
0.814334	3.81693		0.814334	3.43289		0.814334	2.88958		0.814334	3.0133		0.814334	3.03312		0.814334	2.93693
0.817228	3.9657		0.817228	3.58923		0.817228	3.05562		0.817228	3.17228		0.817228	3.18026		0.817228	3.07096
0.820122	4.13457		0.820122	3.76504		0.820122	3.23793		0.820122	3.34558		0.820122	3.33995		0.820122	3.21611
0.823016	4.32568		0.823016	3.96251		0.823016	3.43837		0.823016	3.53478		0.823016	3.51354		0.823016	3.37355
0.82591	4.54136		0.82591	4.18405		0.82591	3.65898		0.82591	3.74161		0.82591	3.70248		0.82591	3.54459
0.828804	4.78423		0.828804	4.43232		0.828804	3.902		0.828804	3.96795		0.828804	3.90839		0.828804	3.73061
0.831698	5.05713		0.831698	4.71024		0.831698	4.16988		0.831698	4.21582		0.831698	4.13298		0.831698	3.9331
0.834592	5.36308		0.834592	5.02087		0.834592	4.46519		0.834592	4.48735		0.834592	4.37802		0.834592	4.15361
0.837486	5.70522		0.837486	5.36745		0.837486	4.79065		0.837486	4.78476		0.837486	4.64536		0.837486	4.39372
0.840379	6.08672		0.840379	5.75323		0.840379	5.14902		0.840379	5.11026		0.840379	4.93681		0.840379	4.65498
0.843273	6.51064		0.843273	6.18139		0.843273	5.54302		0.843273	5.46595		0.843273	5.25405		0.843273	4.9388
0.846167	6.97972		0.846167	6.65483		0.846167	5.97514		0.846167	5.85372		0.846167	5.59853		0.846167	5.24636
0.849061	7.4962		0.849061	7.17597		0.849061	6.44748		0.849061	6.275		0.849061	5.97129		0.849061	5.57846
0.851955	8.06152		0.851955	7.74648		0.851955	6.96153		0.851955	6.73064		0.851955	6.37277		0.851955	5.93535
0.854849	8.67597		0.854849	8.36694		0.854849	7.51779		0.854849	7.22055		0.854849	6.80257		0.854849	6.31651
0.857743	9.33868		0.857743	9.03677		0.857743	8.11576		0.857743	7.74369		0.857743	7.25942		0.857743	6.7206
0.860637	10.0466		0.860637	9.75323		0.860637	8.75287		0.860637	8.29719		0.860637	7.74044		0.860637	7.14488
0.863531	10.7967		0.863531	10.5136		0.863531	9.42667		0.863531	8.87816		0.863531	8.24266		0.863531	7.58647
0.866424	11.5796		0.866424	11.3085		0.866424	10.1283		0.866424	9.47847		0.866424	8.75874		0.866424	8.03877
0.869318	12.399		0.869318	12.1425		0.869318	10.8621		0.869318	10.1008		0.869318	9.29039		0.869318	8.50294
0.872212	13.2239		0.872212	12.9828		0.872212	11.596		0.872212	10.7186		0.872212	9.81541		0.872212	8.95983
0.875106	14.1399		0.875106	13.9195		0.875106	12.4138		0.875106	11.4012		0.875106	10.3918		0.875106	9.45957
0.878	14.6529		0.878	14.446		0.878	12.8759		0.878	11.7851		0.878	10.7149		0.878	9.7392

## Sheet: Radial temp distribution
SN 0			SN 0.2			SN 0.4			SN 0.6			SN 0.8			SN 1
Radial distance	temperature		Radial distance	temperature		Radial distance	temperature		Radial distance	temperature		Radial distance	temperature		Radial distance	temperature
0	945.406		0	957.301		0	930.27		0	951		0	971.905		0	990.236
0.005	944.925		0.005	956.664		0.005	929.509		0.005	950		0.005	971.1		0.005	989.397
0.01	943.514		0.01	954.798		0.01	927.249		0.01	948		0.01	968.718		0.01	986.919
0.015	941.16		0.015	951.692		0.015	923.408		0.015	944		0.015	964.692		0.015	982.739
0.02	937.815		0.02	947.295		0.02	917.802		0.02	938		0.02	958.863		0.02	976.706
0.025	933.436		0.025	941.574		0.025	910.244		0.025	930		0.025	951.081		0.025	968.679
0.03	927.881		0.03	934.39		0.03	900.437		0.03	921		0.03	941.079		0.03	958.397
0.035	920.677		0.035	925.232		0.035	887.672		0.035	908		0.035	928.198		0.035	945.191
0.04	909.053		0.04	911.01		0.04	868.261		0.04	888		0.04	908.923		0.04	925.442
0.045	772.27		0.045	768.944		0.045	733.69		0.045	746		0.045	757.125		0.045	764.58

## Sheet: n2o distribution
SN 0			SN 0.2			SN 0.4			SN 0.6			SN 0.8			SN 1
Axial distance	n2o mass fraction		Axial distance	n2o mass fraction		Axial distance	n2o mass fraction		Axial distance	n2o mass fraction		Axial distance	n2o mass fraction		Axial distance	n2o mass fraction
0.00115113	2.08548e-10		0.00115113	2.07937e-10		0.00115113	1.3602e-10		0.00115113	2.2172e-11		0.00115113	1.56609e-11		0.00115113	1.01355e-11
0.00404502	2.94234e-10		0.00404502	2.91823e-10		0.00404502	1.61006e-10		0.00404502	3.25357e-11		0.00404502	1.74389e-11		0.00404502	1.13196e-11
0.00693891	3.94918e-10		0.00693891	3.88915e-10		0.00693891	1.79982e-10		0.00693891	4.1605e-11		0.00693891	1.89851e-11		0.00693891	1.217e-11
0.0098328	5.0936e-10		0.0098328	4.96203e-10		0.0098328	1.92534e-10		0.0098328	4.83283e-11		0.0098328	2.03795e-11		0.0098328	1.25155e-11
0.0127267	6.34678e-10		0.0127267	6.08425e-10		0.0127267	2.00268e-10		0.0127267	5.38556e-11		0.0127267	2.13823e-11		0.0127267	1.22919e-11
0.0156206	7.65787e-10		0.0156206	7.18626e-10		0.0156206	2.06259e-10		0.0156206	5.77172e-11		0.0156206	2.17962e-11		0.0156206	1.15701e-11
0.0185145	8.95637e-10		0.0185145	8.18985e-10		0.0185145	2.1323e-10		0.0185145	5.94484e-11		0.0185145	2.15396e-11		0.0185145	1.0518e-11
0.0214084	1.0164e-09		0.0214084	9.0242e-10		0.0214084	2.22193e-10		0.0214084	5.9081e-11		0.0214084	2.07593e-11		0.0214084	9.37648e-12
0.0243023	1.12122e-09		0.0243023	9.64529e-10		0.0243023	2.32532e-10		0.0243023	5.7111e-11		0.0243023	1.95759e-11		0.0243023	8.33513e-12
0.0271961	1.20556e-09		0.0271961	1.00364e-09		0.0271961	2.42946e-10		0.0271961	5.41132e-11		0.0271961	1.80463e-11		0.0271961	7.59914e-12
0.03009	1.2672e-09		0.03009	1.02096e-09		0.03009	2.52152e-10		0.03009	5.07365e-11		0.03009	1.65e-11		0.03009	7.31417e-12
0.0329839	1.30591e-09		0.0329839	1.01965e-09		0.0329839	2.59289e-10		0.0329839	4.72601e-11		0.0329839	1.5332e-11		0.0329839	7.60665e-12
0.0358778	1.32305e-09		0.0358778	1.00351e-09		0.0358778	2.64046e-10		0.0358778	4.37459e-11		0.0358778	1.49441e-11		0.0358778	8.58474e-12
0.0387717	1.3218e-09		0.0387717	9.76425e-10		0.0387717	2.66397e-10		0.0387717	4.07747e-11		0.0387717	1.58705e-11		0.0387717	1.03296e-11
0.0416656	1.30562e-09		0.0416656	9.42191e-10		0.0416656	2.67031e-10		0.0416656	3.9438e-11		0.0416656	1.90711e-11		0.0416656	1.29524e-11
0.0445595	1.27721e-09		0.0445595	9.04616e-10		0.0445595	2.65792e-10		0.0445595	4.24729e-11		0.0445595	2.6708e-11		0.0445595	1.66563e-11
0.0474534	1.23977e-09		0.0474534	8.6713e-10		0.0474534	2.62121e-10		0.0474534	5.81086e-11		0.0474534	4.43031e-11		0.0474534	2.18672e-11
0.0503473	1.19646e-09		0.0503473	8.3302e-10		0.0503473	2.56649e-10		0.0503473	1.08111e-10		0.0503473	8.44902e-11		0.0503473	2.98214e-11
0.0532412	1.15006e-09		0.0532412	8.05027e-10		0.0532412	2.49901e-10		0.0532412	2.39021e-10		0.0532412	1.77695e-10		0.0532412	4.40054e-11
0.056135	1.10313e-09		0.056135	7.85059e-10		0.056135	2.42111e-10		0.056135	5.61315e-10		0.056135	3.88497e-10		0.056135	7.34152e-11
0.0590289	1.05797e-09		0.0590289	7.74164e-10		0.0590289	2.33466e-10		0.0590289	1.2401e-09		0.0590289	8.20472e-10		0.0590289	1.39779e-10
0.0619228	1.01658e-09		0.0619228	7.72188e-10		0.0619228	2.24214e-10		0.0619228	2.57019e-09		0.0619228	1.68273e-09		0.0619228	2.84913e-10
0.0648167	9.80715e-10		0.0648167	7.78141e-10		0.0648167	2.14853e-10		0.0648167	5.13623e-09		0.0648167	3.36637e-09		0.0648167	5.84898e-10
0.0677106	9.51788e-10		0.0677106	7.90948e-10		0.0677106	2.05319e-10		0.0677106	9.7062e-09		0.0677106	6.43822e-09		0.0677106	1.17621e-09
0.0706045	9.30748e-10		0.0706045	8.09482e-10		0.0706045	1.95899e-10		0.0706045	1.67363e-08		0.0706045	1.14591e-08		0.0706045	2.30348e-09
0.0734984	9.18053e-10		0.0734984	8.32319e-10		0.0734984	1.88651e-10		0.0734984	2.56751e-08		0.0734984	1.8484e-08		0.0734984	4.34601e-09
0.0763923	9.13671e-10		0.0763923	8.57925e-10		0.0763923	1.90023e-10		0.0763923	3.48501e-08		0.0763923	2.66755e-08		0.0763923	7.7614e-09
0.0792862	9.17103e-10		0.0792862	8.84802e-10		0.0792862	2.19069e-10		0.0792862	4.09031e-08		0.0792862	3.44494e-08		0.0792862	1.28785e-08
0.0821801	9.28047e-10		0.0821801	9.11583e-10		0.0821801	3.23385e-10		0.0821801	4.07626e-08		0.0821801	3.67871e-08		0.0821801	1.95455e-08
0.085074	9.45744e-10		0.085074	9.37054e-10		0.085074	6.02925e-10		0.085074	3.64002e-08		0.085074	3.32655e-08		0.085074	2.6976e-08
0.085074	9.45744e-10		0.085074	9.37054e-10		0.085074	6.02925e-10		0.085074	3.64002e-08		0.085074	3.32655e-08		0.085074	2.6976e-08
0.0879678	9.69354e-10		0.0879678	9.60279e-10		0.0879678	1.24183e-09		0.0879678	3.14181e-08		0.0879678	2.87804e-08		0.0879678	3.38109e-08
0.0908617	9.98437e-10		0.0908617	9.80685e-10		0.0908617	2.5318e-09		0.0908617	2.69508e-08		0.0908617	2.4819e-08		0.0908617	3.60059e-08
0.0937556	1.0321e-09		0.0937556	9.98264e-10		0.0937556	4.86061e-09		0.0937556	2.3215e-08		0.0937556	2.16135e-08		0.0937556	3.31345e-08
0.0966495	1.0693e-09		0.0966495	1.01262e-09		0.0966495	8.63544e-09		0.0966495	2.01264e-08		0.0966495	1.90757e-08		0.0966495	2.92426e-08
0.0995434	1.10907e-09		0.0995434	1.02362e-09		0.0995434	1.41331e-08		0.0995434	1.75879e-08		0.0995434	1.70782e-08		0.0995434	2.58635e-08
0.102437	1.15025e-09		0.102437	1.03196e-09		0.102437	2.13329e-08		0.102437	1.54859e-08		0.102437	1.54988e-08		0.102437	2.32047e-08
0.105331	1.19168e-09		0.105331	1.03815e-09		0.105331	2.98579e-08		0.105331	1.37548e-08		0.105331	1.42458e-08		0.105331	2.11063e-08
0.108225	1.23232e-09		0.108225	1.04273e-09		0.108225	3.90666e-08		0.108225	1.2334e-08		0.108225	1.32524e-08		0.108225	1.94486e-08
0.111119	1.2712e-09		0.111119	1.04638e-09		0.111119	4.79457e-08		0.111119	1.11659e-08		0.111119	1.24638e-08		0.111119	1.81427e-08
0.114013	1.30818e-09		0.114013	1.0498e-09		0.114013	5.26087e-08		0.114013	1.02099e-08		0.114013	1.18383e-08		0.114013	1.71128e-08
0.116907	1.34214e-09		0.116907	1.05368e-09		0.116907	5.09392e-08		0.116907	9.43094e-09		0.116907	1.13435e-08		0.116907	1.63074e-08
0.119801	1.37255e-09		0.119801	1.05865e-09		0.119801	4.57882e-08		0.119801	8.80015e-09		0.119801	1.09536e-08		0.119801	1.56787e-08
0.122695	1.39924e-09		0.122695	1.06527e-09		0.122695	3.96979e-08		0.122695	8.28887e-09		0.122695	1.06473e-08		0.122695	1.51885e-08
0.125588	1.42173e-09		0.125588	1.07406e-09		0.125588	3.38236e-08		0.125588	7.87391e-09		0.125588	1.04074e-08		0.125588	1.48081e-08
0.128482	1.44079e-09		0.128482	1.0856e-09		0.128482	2.86633e-08		0.128482	7.53972e-09		0.128482	1.02201e-08		0.128482	1.45143e-08
0.131376	1.45625e-09		0.131376	1.09985e-09		0.131376	2.43068e-08		0.131376	7.27161e-09		0.131376	1.00739e-08		0.131376	1.42868e-08
0.13427	1.46803e-09		0.13427	1.11721e-09		0.13427	2.06626e-08		0.13427	7.05686e-09		0.13427	9.95937e-09		0.13427	1.411e-08
0.137164	1.47664e-09		0.137164	1.13809e-09		0.137164	1.76545e-08		0.137164	6.88558e-09		0.137164	9.86912e-09		0.137164	1.39714e-08
0.140058	1.48314e-09		0.140058	1.16185e-09		0.140058	1.51814e-08		0.140058	6.74935e-09		0.140058	9.79716e-09		0.140058	1.38615e-08
0.142952	1.48767e-09		0.142952	1.18813e-09		0.142952	1.31546e-08		0.142952	6.64104e-09		0.142952	9.73886e-09		0.142952	1.37728e-08
0.145846	1.48972e-09		0.145846	1.2167e-09		0.145846	1.1495e-08		0.145846	6.55471e-09		0.145846	9.69067e-09		0.145846	1.36997e-08
0.14874	1.48972e-09		0.14874	1.24723e-09		0.14874	1.0136e-08		0.14874	6.48543e-09		0.14874	9.64988e-09		0.14874	1.36377e-08
0.151633	1.48814e-09		0.151633	1.27946e-09		0.151633	9.02669e-09		0.151633	6.42918e-09		0.151633	9.61447e-09		0.151633	1.35837e-08
0.154527	1.48546e-09		0.154527	1.3135e-09		0.154527	8.12299e-09		0.154527	6.38272e-09		0.154527	9.58289e-09		0.154527	1.35353e-08
0.157421	1.48205e-09		0.157421	1.34856e-09		0.157421	7.38619e-09		0.157421	6.34346e-09		0.157421	9.55405e-09		0.157421	1.34908e-08
0.160315	1.47825e-09		0.160315	1.38394e-09		0.160315	6.78166e-09		0.160315	6.30939e-09		0.160315	9.5271e-09		0.160315	1.3449e-08
0.163209	1.4745e-09		0.163209	1.41979e-09		0.163209	6.28292e-09		0.163209	6.27893e-09		0.163209	9.50145e-09		0.163209	1.34088e-08
0.166103	1.47154e-09		0.166103	1.45633e-09		0.166103	5.87301e-09		0.166103	6.25097e-09		0.166103	9.47666e-09		0.166103	1.33696e-08
0.166103	1.47154e-09		0.166103	1.45633e-09		0.166103	5.87301e-09		0.166103	6.25097e-09		0.166103	9.47666e-09		0.166103	1.33696e-08
0.168997	1.47003e-09		0.168997	1.49391e-09		0.168997	5.53474e-09		0.168997	6.22566e-09		0.168997	9.45251e-09		0.168997	1.33304e-08
0.171891	1.47003e-09		0.171891	1.53278e-09		0.171891	5.25545e-09		0.171891	6.20306e-09		0.171891	9.42886e-09		0.171891	1.32905e-08
0.174785	1.47155e-09		0.174785	1.57216e-09		0.174785	5.02848e-09		0.174785	6.18259e-09		0.174785	9.40544e-09		0.174785	1.32497e-08
0.177678	1.47463e-09		0.177678	1.611e-09		0.177678	4.84751e-09		0.177678	6.16411e-09		0.177678	9.38201e-09		0.177678	1.3208e-08
0.180572	1.47938e-09		0.180572	1.64949e-09		0.180572	4.70292e-09		0.180572	6.14728e-09		0.180572	9.35832e-09		0.180572	1.31654e-08
0.183466	1.48579e-09		0.183466	1.68764e-09		0.183466	4.58663e-09		0.183466	6.13172e-09		0.183466	9.33453e-09		0.183466	1.31217e-08
0.18636	1.49391e-09		0.18636	1.72514e-09		0.18636	4.49372e-09		0.18636	6.11715e-09		0.18636	9.31084e-09		0.18636	1.30771e-08
0.189254	1.50395e-09		0.189254	1.76159e-09		0.189254	4.41993e-09		0.189254	6.10335e-09		0.189254	9.28706e-09		0.189254	1.30314e-08
0.192148	1.51565e-09		0.192148	1.79683e-09		0.192148	4.36159e-09		0.192148	6.09016e-09		0.192148	9.26311e-09		0.192148	1.29847e-08
0.195042	1.52879e-09		0.195042	1.83091e-09		0.195042	4.31558e-09		0.195042	6.07746e-09		0.195042	9.23895e-09		0.195042	1.29373e-08
0.197936	1.54359e-09		0.197936	1.86404e-09		0.197936	4.27929e-09		0.197936	6.06515e-09		0.197936	9.21456e-09		0.197936	1.28892e-08
0.20083	1.56024e-09		0.20083	1.89606e-09		0.20083	4.25058e-09		0.20083	6.05319e-09		0.20083	9.18993e-09		0.20083	1.28405e-08
0.203723	1.57885e-09		0.203723	1.9269e-09		0.203723	4.22772e-09		0.203723	6.0415e-09		0.203723	9.16507e-09		0.203723	1.2791e-08
0.206617	1.59952e-09		0.206617	1.95719e-09		0.206617	4.20929e-09		0.206617	6.03008e-09		0.206617	9.14003e-09		0.206617	1.27409e-08
0.209511	1.62231e-09		0.209511	1.98763e-09		0.209511	4.19425e-09		0.209511	6.01891e-09		0.209511	9.11489e-09		0.209511	1.26901e-08
0.212405	1.64732e-09		0.212405	2.01888e-09		0.212405	4.18181e-09		0.212405	6.00803e-09		0.212405	9.0898e-09		0.212405	1.26387e-08
0.215299	1.67454e-09		0.215299	2.05154e-09		0.215299	4.17139e-09		0.215299	5.99753e-09		0.215299	9.06505e-09		0.215299	1.25865e-08
0.215299	1.67454e-09		0.215299	2.05154e-09		0.215299	4.17139e-09		0.215299	5.99753e-09		0.215299	9.06505e-09		0.215299	1.25865e-08
0.218193	1.7043e-09		0.218193	2.08653e-09		0.218193	4.16224e-09		0.218193	5.987e-09		0.218193	9.04021e-09		0.218193	1.25337e-08
0.221087	1.73686e-09		0.221087	2.12481e-09		0.221087	4.15365e-09		0.221087	5.97582e-09		0.221087	9.01456e-09		0.221087	1.24805e-08
0.223981	1.77217e-09		0.223981	2.167e-09		0.223981	4.14524e-09		0.223981	5.96377e-09		0.223981	8.98796e-09		0.223981	1.24269e-08
0.226875	1.80978e-09		0.226875	2.21354e-09		0.226875	4.13678e-09		0.226875	5.95081e-09		0.226875	8.96039e-09		0.226875	1.23729e-08
0.229768	1.84958e-09		0.229768	2.26439e-09		0.229768	4.12817e-09		0.229768	5.93702e-09		0.229768	8.93194e-09		0.229768	1.23185e-08
0.232662	1.89203e-09		0.232662	2.31995e-09		0.232662	4.11939e-09		0.232662	5.9225e-09		0.232662	8.9027e-09		0.232662	1.22637e-08
0.235556	1.93722e-09		0.235556	2.38124e-09		0.235556	4.11042e-09		0.235556	5.90735e-09		0.235556	8.87274e-09		0.235556	1.22084e-08
0.23845	1.9848e-09		0.23845	2.44869e-09		0.23845	4.10129e-09		0.23845	5.89168e-09		0.23845	8.84213e-09		0.23845	1.21525e-08
0.241344	2.03435e-09		0.241344	2.52239e-09		0.241344	4.09199e-09		0.241344	5.87555e-09		0.241344	8.81087e-09		0.241344	1.2096e-08
0.244238	2.08594e-09		0.244238	2.60249e-09		0.244238	4.08254e-09		0.244238	5.85901e-09		0.244238	8.77898e-09		0.244238	1.20388e-08
0.247132	2.13965e-09		0.247132	2.68913e-09		0.247132	4.07297e-09		0.247132	5.8421e-09		0.247132	8.74645e-09		0.247132	1.19809e-08
0.250026	2.19551e-09		0.250026	2.78274e-09		0.250026	4.06329e-09		0.250026	5.82484e-09		0.250026	8.71324e-09		0.250026	1.19229e-08
0.25292	2.25355e-09		0.25292	2.88425e-09		0.25292	4.0535e-09		0.25292	5.80724e-09		0.25292	8.67935e-09		0.25292	1.18655e-08
0.255814	2.31368e-09		0.255814	2.99471e-09		0.255814	4.04363e-09		0.255814	5.7893e-09		0.255814	8.64519e-09		0.255814	1.18085e-08
0.258707	2.37606e-09		0.258707	3.11507e-09		0.258707	4.03368e-09		0.258707	5.77096e-09		0.258707	8.61117e-09		0.258707	1.1752e-08
0.261601	2.44095e-09		0.261601	3.24621e-09		0.261601	4.02368e-09		0.261601	5.75218e-09		0.261601	8.57726e-09		0.261601	1.16959e-08
0.264495	2.50851e-09		0.264495	3.3896e-09		0.264495	4.01362e-09		0.264495	5.73289e-09		0.264495	8.54346e-09		0.264495	1.16403e-08
0.267389	2.5788e-09		0.267389	3.54637e-09		0.267389	4.00353e-09		0.267389	5.71368e-09		0.267389	8.50976e-09		0.267389	1.15851e-08
0.270283	2.65189e-09		0.270283	3.71659e-09		0.270283	3.99341e-09		0.270283	5.69519e-09		0.270283	8.47618e-09		0.270283	1.15303e-08
0.273177	2.72829e-09		0.273177	3.90015e-09		0.273177	3.98326e-09		0.273177	5.67737e-09		0.273177	8.44271e-09		0.273177	1.14761e-08
0.276071	2.80867e-09		0.276071	4.09659e-09		0.276071	3.9731e-09		0.276071	5.6602e-09		0.276071	8.40936e-09		0.276071	1.14224e-08
0.278965	2.89371e-09		0.278965	4.30558e-09		0.278965	3.96294e-09		0.278965	5.64366e-09		0.278965	8.37613e-09		0.278965	1.13692e-08
0.281859	2.98438e-09		0.281859	4.528e-09		0.281859	3.95278e-09		0.281859	5.6277e-09		0.281859	8.34303e-09		0.281859	1.13166e-08
0.284752	3.08179e-09		0.284752	4.76446e-09		0.284752	3.94262e-09		0.284752	5.6123e-09		0.284752	8.31005e-09		0.284752	1.12648e-08
0.287646	3.1866e-09		0.287646	5.01492e-09		0.287646	3.93247e-09		0.287646	5.59745e-09		0.287646	8.2772e-09		0.287646	1.12137e-08
0.29054	3.29951e-09		0.29054	5.27982e-09		0.29054	3.92233e-09		0.29054	5.58312e-09		0.29054	8.24447e-09		0.29054	1.11636e-08
0.293434	3.42158e-09		0.293434	5.55964e-09		0.293434	3.91222e-09		0.293434	5.5693e-09		0.293434	8.21185e-09		0.293434	1.11146e-08
0.296328	3.55398e-09		0.296328	5.85563e-09		0.296328	3.90212e-09		0.296328	5.55597e-09		0.296328	8.17933e-09		0.296328	1.1065e-08
0.299222	3.69792e-09		0.299222	6.16813e-09		0.299222	3.89204e-09		0.299222	5.54311e-09		0.299222	8.1469e-09		0.299222	1.10132e-08
0.302116	3.85462e-09		0.302116	6.4973e-09		0.302116	3.88199e-09		0.302116	5.53071e-09		0.302116	8.11455e-09		0.302116	1.09592e-08
0.30501	4.02533e-09		0.30501	6.84339e-09		0.30501	3.87196e-09		0.30501	5.51875e-09		0.30501	8.08226e-09		0.30501	1.09031e-08
0.307904	4.21129e-09		0.307904	7.20593e-09		0.307904	3.86195e-09		0.307904	5.50721e-09		0.307904	8.05004e-09		0.307904	1.08449e-08
0.310797	4.41374e-09		0.310797	7.58543e-09		0.310797	3.85195e-09		0.310797	5.49609e-09		0.310797	8.01786e-09		0.310797	1.07846e-08
0.313691	4.63417e-09		0.313691	7.98332e-09		0.313691	3.84195e-09		0.313691	5.48532e-09		0.313691	7.98511e-09		0.313691	1.07222e-08
0.313691	4.63417e-09		0.313691	7.98332e-09		0.313691	3.84195e-09		0.313691	5.48532e-09		0.313691	7.98511e-09		0.313691	1.07222e-08
0.316585	4.87373e-09		0.316585	8.40136e-09		0.316585	3.83154e-09		0.316585	5.47354e-09		0.316585	7.95155e-09		0.316585	1.0659e-08
0.319479	5.13364e-09		0.319479	8.84091e-09		0.319479	3.82046e-09		0.319479	5.45976e-09		0.319479	7.9175e-09		0.319479	1.0596e-08
0.322373	5.41541e-09		0.322373	9.3035e-09		0.322373	3.80886e-09		0.322373	5.44444e-09		0.322373	7.88298e-09		0.322373	1.0533e-08
0.325267	5.71997e-09		0.325267	9.79109e-09		0.325267	3.79688e-09		0.325267	5.42783e-09		0.325267	7.84802e-09		0.325267	1.047e-08
0.328161	6.04834e-09		0.328161	1.03076e-08		0.328161	3.78461e-09		0.328161	5.41012e-09		0.328161	7.81265e-09		0.328161	1.04067e-08
0.331055	6.4019e-09		0.331055	1.08569e-08		0.331055	3.77216e-09		0.331055	5.39148e-09		0.331055	7.77695e-09		0.331055	1.03431e-08
0.333949	6.78203e-09		0.333949	1.14427e-08		0.333949	3.75957e-09		0.333949	5.37205e-09		0.333949	7.74095e-09		0.333949	1.02789e-08
0.336842	7.19015e-09		0.336842	1.20676e-08		0.336842	3.74692e-09		0.336842	5.35193e-09		0.336842	7.70468e-09		0.336842	1.0215e-08
0.339736	7.62778e-09		0.339736	1.27334e-08		0.339736	3.73425e-09		0.339736	5.33135e-09		0.339736	7.66819e-09		0.339736	1.01521e-08
0.34263	8.09653e-09		0.34263	1.34424e-08		0.34263	3.72158e-09		0.34263	5.31058e-09		0.34263	7.6315e-09		0.34263	1.00904e-08
0.345524	8.59827e-09		0.345524	1.41969e-08		0.345524	3.70896e-09		0.345524	5.2897e-09		0.345524	7.5946e-09		0.345524	1.003e-08
0.348418	9.13513e-09		0.348418	1.49993e-08		0.348418	3.6964e-09		0.348418	5.26876e-09		0.348418	7.55752e-09		0.348418	9.97103e-09
0.351312	9.70956e-09		0.351312	1.5855e-08		0.351312	3.68393e-09		0.351312	5.24781e-09		0.351312	7.52024e-09		0.351312	9.9135e-09
0.354206	1.03244e-08		0.354206	1.6769e-08		0.354206	3.67157e-09		0.354206	5.22689e-09		0.354206	7.48275e-09		0.354206	9.85755e-09
0.3571	1.0983e-08		0.3571	1.7743e-08		0.3571	3.65933e-09		0.3571	5.20603e-09		0.3571	7.44504e-09		0.3571	9.80331e-09
0.359994	1.169e-08		0.359994	1.87806e-08		0.359994	3.64723e-09		0.359994	5.18525e-09		0.359994	7.40709e-09		0.359994	9.75094e-09
0.362887	1.24509e-08		0.362887	1.98871e-08		0.362887	3.63528e-09		0.362887	5.16458e-09		0.362887	7.36887e-09		0.362887	9.7006e-09
0.365781	1.32711e-08		0.365781	2.10704e-08		0.365781	3.62349e-09		0.365781	5.14403e-09		0.365781	7.33079e-09		0.365781	9.6525e-09
0.368675	1.41553e-08		0.368675	2.23424e-08		0.368675	3.61186e-09		0.368675	5.12361e-09		0.368675	7.29327e-09		0.368675	9.60684e-09
0.371569	1.51084e-08		0.371569	2.37156e-08		0.371569	3.6004e-09		0.371569	5.10335e-09		0.371569	7.2563e-09		0.371569	9.56385e-09
0.374463	1.61346e-08		0.374463	2.52027e-08		0.374463	3.58912e-09		0.374463	5.08324e-09		0.374463	7.21991e-09		0.374463	9.52371e-09
0.377357	1.72371e-08		0.377357	2.68188e-08		0.377357	3.578e-09		0.377357	5.06331e-09		0.377357	7.1841e-09		0.377357	9.48453e-09
0.380251	1.84191e-08		0.380251	2.85792e-08		0.380251	3.56704e-09		0.380251	5.04354e-09		0.380251	7.14892e-09		0.380251	9.44442e-09
0.383145	1.96833e-08		0.383145	3.05052e-08		0.383145	3.55622e-09		0.383145	5.02394e-09		0.383145	7.11439e-09		0.383145	9.40351e-09
0.386039	2.10336e-08		0.386039	3.26257e-08		0.386039	3.54552e-09		0.386039	5.0045e-09		0.386039	7.08053e-09		0.386039	9.36186e-09
0.388932	2.24779e-08		0.388932	3.49729e-08		0.388932	3.53493e-09		0.388932	4.98521e-09		0.388932	7.04737e-09		0.388932	9.31947e-09
0.391826	2.40311e-08		0.391826	3.76123e-08		0.391826	3.52439e-09		0.391826	4.96604e-09		0.391826	7.01493e-09		0.391826	9.2763e-09
0.39472	2.57094e-08		0.39472	4.05935e-08		0.39472	3.51388e-09		0.39472	4.94696e-09		0.39472	6.98326e-09		0.39472	9.23228e-09
0.397614	2.75264e-08		0.397614	4.4026e-08		0.397614	3.50335e-09		0.397614	4.92794e-09		0.397614	6.9524e-09		0.397614	9.18731e-09
0.400508	2.94913e-08		0.400508	4.81452e-08		0.400508	3.49268e-09		0.400508	4.90897e-09		0.400508	6.9224e-09		0.400508	9.14126e-09
0.403402	3.16047e-08		0.403402	5.32007e-08		0.403402	3.48176e-09		0.403402	4.8898e-09		0.403402	6.89335e-09		0.403402	9.094e-09
0.403402	3.16047e-08		0.403402	5.32007e-08		0.403402	3.48176e-09		0.403402	4.8898e-09		0.403402	6.89335e-09		0.403402	9.094e-09
0.406296	3.38728e-08		0.406296	5.94373e-08		0.406296	3.47068e-09		0.406296	4.87036e-09		0.406296	6.86449e-09		0.406296	9.04579e-09
0.40919	3.63113e-08		0.40919	6.68889e-08		0.40919	3.45955e-09		0.40919	4.85077e-09		0.40919	6.8351e-09		0.40919	8.99685e-09
0.412084	3.89673e-08		0.412084	7.51003e-08		0.412084	3.44831e-09		0.412084	4.83095e-09		0.412084	6.80527e-09		0.412084	8.94726e-09
0.414977	4.19123e-08		0.414977	8.34679e-08		0.414977	3.43696e-09		0.414977	4.81089e-09		0.414977	6.77505e-09		0.414977	8.89726e-09
0.417871	4.52057e-08		0.417871	9.14385e-08		0.417871	3.42548e-09		0.417871	4.79056e-09		0.417871	6.74446e-09		0.417871	8.84693e-09
0.420765	4.89565e-08		0.420765	9.86813e-08		0.420765	3.41386e-09		0.420765	4.76999e-09		0.420765	6.71347e-09		0.420765	8.79627e-09
0.423659	5.33766e-08		0.423659	1.05055e-07		0.423659	3.40212e-09		0.423659	4.74917e-09		0.423659	6.6821e-09		0.423659	8.74525e-09
0.426553	5.87896e-08		0.426553	1.1048e-07		0.426553	3.39026e-09		0.426553	4.72811e-09		0.426553	6.65037e-09		0.426553	8.69387e-09
0.429447	6.53492e-08		0.429447	1.14947e-07		0.429447	3.3783e-09		0.429447	4.70685e-09		0.429447	6.61833e-09		0.429447	8.64213e-09
0.432341	7.26521e-08		0.432341	1.18431e-07		0.432341	3.36625e-09		0.432341	4.68539e-09		0.432341	6.58599e-09		0.432341	8.59004e-09
0.435235	8.01348e-08		0.435235	1.2103e-07		0.435235	3.35414e-09		0.435235	4.66375e-09		0.435235	6.55342e-09		0.435235	8.53761e-09
0.438129	8.71575e-08		0.438129	1.2285e-07		0.438129	3.34198e-09		0.438129	4.64196e-09		0.438129	6.52064e-09		0.438129	8.48486e-09
0.441023	9.33015e-08		0.441023	1.23727e-07		0.441023	3.3298e-09		0.441023	4.62001e-09		0.441023	6.48769e-09		0.441023	8.4318e-09
0.443916	9.85084e-08		0.443916	1.23726e-07		0.443916	3.3176e-09		0.443916	4.59791e-09		0.443916	6.45462e-09		0.443916	8.37844e-09
0.44681	1.02714e-07		0.44681	1.23194e-07		0.44681	3.30541e-09		0.44681	4.57567e-09		0.44681	6.42145e-09		0.44681	8.32479e-09
0.449704	1.05959e-07		0.449704	1.22169e-07		0.449704	3.29323e-09		0.449704	4.55328e-09		0.449704	6.38821e-09		0.449704	8.27097e-09
0.452598	1.08315e-07		0.452598	1.20635e-07		0.452598	3.28109e-09		0.452598	4.53074e-09		0.452598	6.35493e-09		0.452598	8.21712e-09
0.455492	1.09826e-07		0.455492	1.18642e-07		0.455492	3.269e-09		0.455492	4.50803e-09		0.455492	6.32163e-09		0.455492	8.16325e-09
0.458386	1.10481e-07		0.458386	1.1626e-07		0.458386	3.25698e-09		0.458386	4.48514e-09		0.458386	6.28829e-09		0.458386	8.1094e-09
0.46128	1.10404e-07		0.46128	1.13556e-07		0.46128	3.24504e-09		0.46128	4.46205e-09		0.46128	6.25492e-09		0.46128	8.05556e-09
0.464174	1.09788e-07		0.464174	1.10588e-07		0.464174	3.23321e-09		0.464174	4.43894e-09		0.464174	6.22151e-09		0.464174	8.00176e-09
0.467068	1.08744e-07		0.467068	1.07401e-07		0.467068	3.22152e-09		0.467068	4.41599e-09		0.467068	6.18809e-09		0.467068	7.94802e-09
0.469961	1.07285e-07		0.469961	1.04048e-07		0.469961	3.21e-09		0.469961	4.39323e-09		0.469961	6.15466e-09		0.469961	7.89434e-09
0.472855	1.05275e-07		0.472855	1.00581e-07		0.472855	3.19868e-09		0.472855	4.37067e-09		0.472855	6.12124e-09		0.472855	7.84075e-09
0.475749	1.02822e-07		0.475749	9.70388e-08		0.475749	3.18761e-09		0.475749	4.34833e-09		0.475749	6.08785e-09		0.475749	7.78725e-09
0.478643	1.00092e-07		0.478643	9.34614e-08		0.478643	3.17671e-09		0.478643	4.32624e-09		0.478643	6.05448e-09		0.478643	7.73385e-09
0.481537	9.70997e-08		0.481537	8.98666e-08		0.481537	3.16577e-09		0.481537	4.3044e-09		0.481537	6.02114e-09		0.481537	7.68056e-09
0.484431	9.38985e-08		0.484431	8.62702e-08		0.484431	3.15474e-09		0.484431	4.28283e-09		0.484431	5.98784e-09		0.484431	7.62738e-09
0.487325	9.05612e-08		0.487325	8.27039e-08		0.487325	3.14361e-09		0.487325	4.26156e-09		0.487325	5.95459e-09		0.487325	7.57462e-09
0.490219	8.71375e-08		0.490219	7.91856e-08		0.490219	3.13239e-09		0.490219	4.24059e-09		0.490219	5.92139e-09		0.490219	7.52259e-09
0.493113	8.36558e-08		0.493113	7.5721e-08		0.493113	3.12108e-09		0.493113	4.21994e-09		0.493113	5.88823e-09		0.493113	7.47134e-09
0.496006	8.01905e-08		0.496006	7.2323e-08		0.496006	3.1097e-09		0.496006	4.19965e-09		0.496006	5.85512e-09		0.496006	7.42093e-09
0.4989	7.67736e-08		0.4989	6.90103e-08		0.4989	3.09824e-09		0.4989	4.17971e-09		0.4989	5.82205e-09		0.4989	7.3714e-09
0.501794	7.33894e-08		0.501794	6.57938e-08		0.501794	3.08672e-09		0.501794	4.16018e-09		0.501794	5.78912e-09		0.501794	7.32284e-09
0.504688	7.00442e-08		0.504688	6.26902e-08		0.504688	3.07515e-09		0.504688	4.14107e-09		0.504688	5.75646e-09		0.504688	7.27532e-09
0.507582	6.67709e-08		0.507582	5.97054e-08		0.507582	3.06354e-09		0.507582	4.12245e-09		0.507582	5.72408e-09		0.507582	7.22894e-09
0.510476	6.35828e-08		0.510476	5.68301e-08		0.510476	3.05188e-09		0.510476	4.10438e-09		0.510476	5.692e-09		0.510476	7.18378e-09
0.51337	6.04843e-08		0.51337	5.40674e-08		0.51337	3.04019e-09		0.51337	4.08699e-09		0.51337	5.66027e-09		0.51337	7.13993e-09
0.516264	5.74727e-08		0.516264	5.14095e-08		0.516264	3.02848e-09		0.516264	4.07042e-09		0.516264	5.62889e-09		0.516264	7.09744e-09
0.519158	5.45713e-08		0.519158	4.88525e-08		0.519158	3.01675e-09		0.519158	4.05488e-09		0.519158	5.59792e-09		0.519158	7.05633e-09
0.522051	5.17966e-08		0.522051	4.64176e-08		0.522051	3.00499e-09		0.522051	4.03982e-09		0.522051	5.5674e-09		0.522051	7.01662e-09
0.524945	4.91428e-08		0.524945	4.41255e-08		0.524945	2.99321e-09		0.524945	4.02461e-09		0.524945	5.53738e-09		0.524945	6.97887e-09
0.524945	4.91428e-08		0.524945	4.41255e-08		0.524945	2.99321e-09		0.524945	4.02461e-09		0.524945	5.53738e-09		0.524945	6.97887e-09
0.527839	4.66032e-08		0.527839	4.19638e-08		0.527839	2.98142e-09		0.527839	4.00942e-09		0.527839	5.50773e-09		0.527839	6.94213e-09
0.530733	4.41721e-08		0.530733	3.99065e-08		0.530733	2.96964e-09		0.530733	3.99437e-09		0.530733	5.47829e-09		0.530733	6.90493e-09
0.533627	4.18593e-08		0.533627	3.79465e-08		0.533627	2.95786e-09		0.533627	3.97942e-09		0.533627	5.44905e-09		0.533627	6.86733e-09
0.536521	3.96685e-08		0.536521	3.60832e-08		0.536521	2.94606e-09		0.536521	3.96451e-09		0.536521	5.42e-09		0.536521	6.8294e-09
0.539415	3.75875e-08		0.539415	3.43189e-08		0.539415	2.93425e-09		0.539415	3.94956e-09		0.539415	5.39112e-09		0.539415	6.79121e-09
0.542309	3.56108e-08		0.542309	3.26559e-08		0.542309	2.9224e-09		0.542309	3.9345e-09		0.542309	5.36242e-09		0.542309	6.75282e-09
0.545203	3.37392e-08		0.545203	3.10921e-08		0.545203	2.9105e-09		0.545203	3.91928e-09		0.545203	5.33389e-09		0.545203	6.71425e-09
0.548096	3.19597e-08		0.548096	2.96171e-08		0.548096	2.89853e-09		0.548096	3.90389e-09		0.548096	5.30548e-09		0.548096	6.67554e-09
0.55099	3.02701e-08		0.55099	2.82189e-08		0.55099	2.88647e-09		0.55099	3.8883e-09		0.55099	5.27715e-09		0.55099	6.63666e-09
0.553884	2.8679e-08		0.553884	2.68912e-08		0.553884	2.8744e-09		0.553884	3.8725e-09		0.553884	5.2489e-09		0.553884	6.59763e-09
0.556778	2.7187e-08		0.556778	2.56275e-08		0.556778	2.86243e-09		0.556778	3.85649e-09		0.556778	5.22072e-09		0.556778	6.55845e-09
0.559672	2.57746e-08		0.559672	2.44266e-08		0.559672	2.85055e-09		0.559672	3.84028e-09		0.559672	5.19262e-09		0.559672	6.51911e-09
0.562566	2.44283e-08		0.562566	2.32893e-08		0.562566	2.83877e-09		0.562566	3.82385e-09		0.562566	5.16459e-09		0.562566	6.4797e-09
0.56546	2.31589e-08		0.56546	2.22135e-08		0.56546	2.82706e-09		0.56546	3.80722e-09		0.56546	5.13662e-09		0.56546	6.44032e-09
0.568354	2.19613e-08		0.568354	2.1198e-08		0.568354	2.81542e-09		0.568354	3.79037e-09		0.568354	5.10873e-09		0.568354	6.401e-09
0.571248	2.08245e-08		0.571248	2.02408e-08		0.571248	2.80384e-09		0.571248	3.77331e-09		0.571248	5.0809e-09		0.571248	6.36176e-09
0.574142	1.97405e-08		0.574142	1.93397e-08		0.574142	2.79231e-09		0.574142	3.75604e-09		0.574142	5.05313e-09		0.574142	6.32262e-09
0.577035	1.87037e-08		0.577035	1.84821e-08		0.577035	2.78082e-09		0.577035	3.73853e-09		0.577035	5.02543e-09		0.577035	6.28361e-09
0.579929	1.77169e-08		0.579929	1.76579e-08		0.579929	2.76936e-09		0.579929	3.72092e-09		0.579929	4.99781e-09		0.579929	6.24476e-09
0.582823	1.67848e-08		0.582823	1.68721e-08		0.582823	2.75794e-09		0.582823	3.70334e-09		0.582823	4.97033e-09		0.582823	6.20607e-09
0.585717	1.59188e-08		0.585717	1.61259e-08		0.585717	2.74654e-09		0.585717	3.68581e-09		0.585717	4.94302e-09		0.585717	6.16757e-09
0.588611	1.50945e-08		0.588611	1.54232e-08		0.588611	2.73516e-09		0.588611	3.66834e-09		0.588611	4.9159e-09		0.588611	6.12927e-09
0.591505	1.42884e-08		0.591505	1.47681e-08		0.591505	2.72381e-09		0.591505	3.65094e-09		0.591505	4.88895e-09		0.591505	6.09119e-09
0.594399	1.35195e-08		0.594399	1.41576e-08		0.594399	2.71248e-09		0.594399	3.63362e-09		0.594399	4.86217e-09		0.594399	6.05332e-09
0.597293	1.27999e-08		0.597293	1.35735e-08		0.597293	2.70119e-09		0.597293	3.61641e-09		0.597293	4.83558e-09		0.597293	6.01569e-09
0.600186	1.21408e-08		0.600186	1.29978e-08		0.600186	2.68995e-09		0.600186	3.5993e-09		0.600186	4.80918e-09		0.600186	5.9783e-09
0.60308	1.15504e-08		0.60308	1.24378e-08		0.60308	2.67877e-09		0.60308	3.5823e-09		0.60308	4.78298e-09		0.60308	5.94118e-09
0.605974	1.10253e-08		0.605974	1.19031e-08		0.605974	2.66767e-09		0.605974	3.56544e-09		0.605974	4.75697e-09		0.605974	5.90447e-09
0.608868	1.05379e-08		0.608868	1.1395e-08		0.608868	2.65668e-09		0.608868	3.54871e-09		0.608868	4.73118e-09		0.608868	5.86828e-09
0.611762	1.0062e-08		0.611762	1.0914e-08		0.611762	2.64582e-09		0.611762	3.53213e-09		0.611762	4.70559e-09		0.611762	5.83264e-09
0.614656	9.60004e-09		0.614656	1.04637e-08		0.614656	2.63513e-09		0.614656	3.51571e-09		0.614656	4.68023e-09		0.614656	5.79754e-09
0.61755	9.15687e-09		0.61755	1.00495e-08		0.61755	2.62465e-09		0.61755	3.49946e-09		0.61755	4.65509e-09		0.61755	5.76299e-09
0.620444	8.73984e-09		0.620444	9.67389e-09		0.620444	2.61444e-09		0.620444	3.48338e-09		0.620444	4.63018e-09		0.620444	5.729e-09
0.623338	8.35752e-09		0.623338	9.33571e-09		0.623338	2.60456e-09		0.623338	3.46748e-09		0.623338	4.6055e-09		0.623338	5.69558e-09
0.626231	8.00638e-09		0.626231	9.01497e-09		0.626231	2.59484e-09		0.626231	3.45176e-09		0.626231	4.58106e-09		0.626231	5.66274e-09
0.629125	7.68185e-09		0.629125	8.69827e-09		0.629125	2.58509e-09		0.629125	3.43621e-09		0.629125	4.55686e-09		0.629125	5.6305e-09
0.632019	7.38684e-09		0.632019	8.39079e-09		0.632019	2.57532e-09		0.632019	3.42083e-09		0.632019	4.53291e-09		0.632019	5.59888e-09
0.634913	7.12929e-09		0.634913	8.09454e-09		0.634913	2.56554e-09		0.634913	3.40559e-09		0.634913	4.50922e-09		0.634913	5.56791e-09
0.637807	6.893e-09		0.637807	7.81435e-09		0.637807	2.55579e-09		0.637807	3.39059e-09		0.637807	4.48582e-09		0.637807	5.53764e-09
0.640701	6.66105e-09		0.640701	7.55706e-09		0.640701	2.54608e-09		0.640701	3.37592e-09		0.640701	4.46275e-09		0.640701	5.50812e-09
0.643595	6.44358e-09		0.643595	7.33099e-09		0.643595	2.53648e-09		0.643595	3.36165e-09		0.643595	4.44023e-09		0.643595	5.47948e-09
0.643595	6.44358e-09		0.643595	7.33099e-09		0.643595	2.53648e-09		0.643595	3.36165e-09		0.643595	4.44023e-09		0.643595	5.47948e-09
0.646489	6.24083e-09		0.646489	7.13e-09		0.646489	2.52695e-09		0.646489	3.34765e-09		0.646489	4.41823e-09		0.646489	5.45129e-09
0.649383	6.04827e-09		0.649383	6.94175e-09		0.649383	2.51743e-09		0.649383	3.33374e-09		0.649383	4.39648e-09		0.649383	5.4231e-09
0.652277	5.86587e-09		0.652277	6.76436e-09		0.652277	2.50792e-09		0.652277	3.31989e-09		0.652277	4.37497e-09		0.652277	5.39497e-09
0.65517	5.69278e-09		0.65517	6.59586e-09		0.65517	2.49843e-09		0.65517	3.30608e-09		0.65517	4.35365e-09		0.65517	5.36688e-09
0.658064	5.52785e-09		0.658064	6.43443e-09		0.658064	2.48893e-09		0.658064	3.29229e-09		0.658064	4.33247e-09		0.658064	5.3388e-09
0.660958	5.36995e-09		0.660958	6.27828e-09		0.660958	2.47943e-09		0.660958	3.27851e-09		0.660958	4.31141e-09		0.660958	5.31071e-09
0.663852	5.21799e-09		0.663852	6.12603e-09		0.663852	2.46992e-09		0.663852	3.26473e-09		0.663852	4.29045e-09		0.663852	5.28262e-09
0.666746	5.07103e-09		0.666746	5.97844e-09		0.666746	2.46039e-09		0.666746	3.25095e-09		0.666746	4.26956e-09		0.666746	5.25452e-09
0.66964	4.92868e-09		0.66964	5.83543e-09		0.66964	2.45084e-09		0.66964	3.23718e-09		0.66964	4.24874e-09		0.66964	5.22639e-09
0.672534	4.79077e-09		0.672534	5.69521e-09		0.672534	2.44125e-09		0.672534	3.22341e-09		0.672534	4.22798e-09		0.672534	5.19822e-09
0.675428	4.65699e-09		0.675428	5.5569e-09		0.675428	2.43163e-09		0.675428	3.20964e-09		0.675428	4.20727e-09		0.675428	5.17001e-09
0.678322	4.52698e-09		0.678322	5.42175e-09		0.678322	2.42195e-09		0.678322	3.19587e-09		0.678322	4.18661e-09		0.678322	5.14174e-09
0.681215	4.40087e-09		0.681215	5.29144e-09		0.681215	2.4122e-09		0.681215	3.1821e-09		0.681215	4.16598e-09		0.681215	5.11339e-09
0.684109	4.27889e-09		0.684109	5.16598e-09		0.684109	2.40236e-09		0.684109	3.1683e-09		0.684109	4.14539e-09		0.684109	5.08494e-09
0.687003	4.16071e-09		0.687003	5.04538e-09		0.687003	2.39242e-09		0.687003	3.15448e-09		0.687003	4.12482e-09		0.687003	5.05635e-09
0.689897	4.04594e-09		0.689897	4.9298e-09		0.689897	2.38236e-09		0.689897	3.14063e-09		0.689897	4.10424e-09		0.689897	5.02759e-09
0.692791	3.93572e-09		0.692791	4.81866e-09		0.692791	2.37214e-09		0.692791	3.12673e-09		0.692791	4.08364e-09		0.692791	4.99879e-09
0.695685	3.83159e-09		0.695685	4.71147e-09		0.695685	2.36174e-09		0.695685	3.11276e-09		0.695685	4.06298e-09		0.695685	4.97015e-09
0.698579	3.73382e-09		0.698579	4.6086e-09		0.698579	2.35113e-09		0.698579	3.0987e-09		0.698579	4.0422e-09		0.698579	4.94168e-09
0.701473	3.64273e-09		0.701473	4.51054e-09		0.701473	2.3405e-09		0.701473	3.08463e-09		0.701473	4.02122e-09		0.701473	4.91341e-09
0.704367	3.55882e-09		0.704367	4.41795e-09		0.704367	2.33006e-09		0.704367	3.07063e-09		0.704367	3.99994e-09		0.704367	4.88533e-09
0.70726	3.48301e-09		0.70726	4.33073e-09		0.70726	2.31984e-09		0.70726	3.0567e-09		0.70726	3.97822e-09		0.70726	4.85748e-09
0.710154	3.41697e-09		0.710154	4.24881e-09		0.710154	2.30985e-09		0.710154	3.04284e-09		0.710154	3.95586e-09		0.710154	4.82988e-09
0.713048	3.35977e-09		0.713048	4.17336e-09		0.713048	2.30009e-09		0.713048	3.02906e-09		0.713048	3.93258e-09		0.713048	4.80259e-09
0.715942	3.31048e-09		0.715942	4.10603e-09		0.715942	2.29063e-09		0.715942	3.01538e-09		0.715942	3.90795e-09		0.715942	4.77568e-09
0.715942	3.31048e-09		0.715942	4.10603e-09		0.715942	2.29063e-09		0.715942	3.01538e-09		0.715942	3.90795e-09		0.715942	4.77568e-09
0.718836	3.26653e-09		0.718836	4.0445e-09		0.718836	2.28135e-09		0.718836	3.00174e-09		0.718836	3.88259e-09		0.718836	4.74898e-09
0.72173	3.22427e-09		0.72173	3.98536e-09		0.72173	2.27215e-09		0.72173	2.98809e-09		0.72173	3.85732e-09		0.72173	4.72225e-09
0.724624	3.18361e-09		0.724624	3.92859e-09		0.724624	2.26302e-09		0.724624	2.97441e-09		0.724624	3.83217e-09		0.724624	4.69545e-09
0.727518	3.14474e-09		0.727518	3.87416e-09		0.727518	2.25393e-09		0.727518	2.96069e-09		0.727518	3.80713e-09		0.727518	4.66854e-09
0.730412	3.10757e-09		0.730412	3.82178e-09		0.730412	2.24487e-09		0.730412	2.9469e-09		0.730412	3.78222e-09		0.730412	4.64146e-09
0.733305	3.07165e-09		0.733305	3.77108e-09		0.733305	2.23583e-09		0.733305	2.93304e-09		0.733305	3.75748e-09		0.733305	4.61416e-09
0.736199	3.03655e-09		0.736199	3.72173e-09		0.736199	2.22677e-09		0.736199	2.91907e-09		0.736199	3.73294e-09		0.736199	4.58658e-09
0.739093	3.00188e-09		0.739093	3.67341e-09		0.739093	2.21768e-09		0.739093	2.90499e-09		0.739093	3.70862e-09		0.739093	4.55865e-09
0.741987	2.96728e-09		0.741987	3.62582e-09		0.741987	2.20854e-09		0.741987	2.89076e-09		0.741987	3.68457e-09		0.741987	4.53035e-09
0.744881	2.93244e-09		0.744881	3.57899e-09		0.744881	2.19932e-09		0.744881	2.87635e-09		0.744881	3.66082e-09		0.744881	4.50164e-09
0.747775	2.89746e-09		0.747775	3.53296e-09		0.747775	2.19e-09		0.747775	2.86173e-09		0.747775	3.63745e-09		0.747775	4.47244e-09
0.750669	2.86267e-09		0.750669	3.48751e-09		0.750669	2.18055e-09		0.750669	2.84686e-09		0.750669	3.6142e-09		0.750669	4.44267e-09
0.753563	2.82802e-09		0.753563	3.44245e-09		0.753563	2.17093e-09		0.753563	2.83171e-09		0.753563	3.59064e-09		0.753563	4.41224e-09
0.756457	2.79326e-09		0.756457	3.39756e-09		0.756457	2.16112e-09		0.756457	2.81623e-09		0.756457	3.56665e-09		0.756457	4.38107e-09
0.75935	2.75819e-09		0.75935	3.35265e-09		0.75935	2.15107e-09		0.75935	2.80038e-09		0.75935	3.54219e-09		0.75935	4.34904e-09
0.762244	2.72265e-09		0.762244	3.30755e-09		0.762244	2.14074e-09		0.762244	2.78409e-09		0.762244	3.51725e-09		0.762244	4.31606e-09
0.765138	2.68649e-09		0.765138	3.26209e-09		0.765138	2.13009e-09		0.765138	2.76733e-09		0.765138	3.49181e-09		0.765138	4.28202e-09
0.768032	2.64956e-09		0.768032	3.21641e-09		0.768032	2.11908e-09		0.768032	2.75004e-09		0.768032	3.46586e-09		0.768032	4.24682e-09
0.770926	2.61215e-09		0.770926	3.17069e-09		0.770926	2.10768e-09		0.770926	2.73218e-09		0.770926	3.43938e-09		0.770926	4.21037e-09
0.77382	2.57465e-09		0.77382	3.12487e-09		0.77382	2.09584e-09		0.77382	2.71372e-09		0.77382	3.41234e-09		0.77382	4.17256e-09
0.776714	2.53705e-09		0.776714	3.0789e-09		0.776714	2.08365e-09		0.776714	2.69462e-09		0.776714	3.38477e-09		0.776714	4.13333e-09
0.779608	2.49941e-09		0.779608	3.03273e-09		0.779608	2.07114e-09		0.779608	2.67486e-09		0.779608	3.35667e-09		0.779608	4.09268e-09
0.782502	2.46181e-09		0.782502	2.98637e-09		0.782502	2.05826e-09		0.782502	2.65445e-09		0.782502	3.32809e-09		0.782502	4.05065e-09
0.785396	2.4244e-09		0.785396	2.93981e-09		0.785396	2.04499e-09		0.785396	2.6334e-09		0.785396	3.29908e-09		0.785396	4.00726e-09
0.788289	2.38735e-09		0.788289	2.89344e-09		0.788289	2.03133e-09		0.788289	2.61172e-09		0.788289	3.26971e-09		0.788289	3.96255e-09
0.791183	2.35086e-09		0.791183	2.84811e-09		0.791183	2.01729e-09		0.791183	2.58944e-09		0.791183	3.24007e-09		0.791183	3.91659e-09
0.794077	2.31545e-09		0.794077	2.80446e-09		0.794077	2.00289e-09		0.794077	2.56662e-09		0.794077	3.20998e-09		0.794077	3.86946e-09
0.796971	2.28168e-09		0.796971	2.76265e-09		0.796971	1.98813e-09		0.796971	2.54327e-09		0.796971	3.17924e-09		0.796971	3.82123e-09
0.799865	2.24971e-09		0.799865	2.72274e-09		0.799865	1.97303e-09		0.799865	2.51941e-09		0.799865	3.1479e-09		0.799865	3.77196e-09
0.799865	2.24971e-09		0.799865	2.72274e-09		0.799865	1.97303e-09		0.799865	2.51941e-09		0.799865	3.1479e-09		0.799865	3.77196e-09
0.802759	2.21851e-09		0.802759	2.68363e-09		0.802759	1.95745e-09		0.802759	2.49491e-09		0.802759	3.11553e-09		0.802759	3.72122e-09
0.805653	2.18708e-09		0.805653	2.64424e-09		0.805653	1.94125e-09		0.805653	2.46959e-09		0.805653	3.08167e-09		0.805653	3.66884e-09
0.808547	2.15559e-09		0.808547	2.60475e-09		0.808547	1.92441e-09		0.808547	2.44345e-09		0.808547	3.04633e-09		0.808547	3.6151e-09
0.811441	2.12418e-09		0.811441	2.56529e-09		0.811441	1.90691e-09		0.811441	2.4165e-09		0.811441	3.00955e-09		0.811441	3.56007e-09
0.814334	2.09288e-09		0.814334	2.52585e-09		0.814334	1.88872e-09		0.814334	2.38873e-09		0.814334	2.97137e-09		0.814334	3.50378e-09
0.817228	2.06179e-09		0.817228	2.48638e-09		0.817228	1.86982e-09		0.817228	2.36015e-09		0.817228	2.93179e-09		0.817228	3.44626e-09
0.820122	2.03099e-09		0.820122	2.44676e-09		0.820122	1.85019e-09		0.820122	2.33075e-09		0.820122	2.89087e-09		0.820122	3.3875e-09
0.823016	2.00038e-09		0.823016	2.40684e-09		0.823016	1.82969e-09		0.823016	2.30052e-09		0.823016	2.84868e-09		0.823016	3.32748e-09
0.82591	1.96987e-09		0.82591	2.36669e-09		0.82591	1.8082e-09		0.82591	2.26949e-09		0.82591	2.80525e-09		0.82591	3.26645e-09
0.828804	1.93933e-09		0.828804	2.3264e-09		0.828804	1.78566e-09		0.828804	2.23767e-09		0.828804	2.7606e-09		0.828804	3.20468e-09
0.831698	1.90871e-09		0.831698	2.28587e-09		0.831698	1.76207e-09		0.831698	2.20512e-09		0.831698	2.71477e-09		0.831698	3.14224e-09
0.834592	1.878e-09		0.834592	2.24504e-09		0.834592	1.73739e-09		0.834592	2.1718e-09		0.834592	2.66781e-09		0.834592	3.07919e-09
0.837486	1.84724e-09		0.837486	2.20386e-09		0.837486	1.71161e-09		0.837486	2.13768e-09		0.837486	2.61984e-09		0.837486	3.01559e-09
0.840379	1.81653e-09		0.840379	2.16239e-09		0.840379	1.68474e-09		0.840379	2.10285e-09		0.840379	2.57112e-09		0.840379	2.95155e-09
0.843273	1.78583e-09		0.843273	2.12073e-09		0.843273	1.65678e-09		0.843273	2.06739e-09		0.843273	2.52187e-09		0.843273	2.88763e-09
0.846167	1.75514e-09		0.846167	2.07912e-09		0.846167	1.62777e-09		0.846167	2.03145e-09		0.846167	2.47223e-09		0.846167	2.82448e-09
0.849061	1.72445e-09		0.849061	2.03782e-09		0.849061	1.59808e-09		0.849061	1.99516e-09		0.849061	2.42233e-09		0.849061	2.76227e-09
0.851955	1.6938e-09		0.851955	1.9969e-09		0.851955	1.56812e-09		0.851955	1.9587e-09		0.851955	2.37231e-09		0.851955	2.70121e-09
0.854849	1.66326e-09		0.854849	1.95646e-09		0.854849	1.53804e-09		0.854849	1.92233e-09		0.854849	2.32269e-09		0.854849	2.64152e-09
0.857743	1.63293e-09		0.857743	1.9166e-09		0.857743	1.50802e-09		0.857743	1.88637e-09		0.857743	2.27412e-09		0.857743	2.58432e-09
0.860637	1.60344e-09		0.860637	1.87742e-09		0.860637	1.47828e-09		0.860637	1.85113e-09		0.860637	2.22698e-09		0.860637	2.53093e-09
0.863531	1.57554e-09		0.863531	1.83986e-09		0.863531	1.44914e-09		0.863531	1.81703e-09		0.863531	2.18174e-09		0.863531	2.48211e-09
0.866424	1.54974e-09		0.866424	1.80509e-09		0.866424	1.42114e-09		0.866424	1.78465e-09		0.866424	2.13904e-09		0.866424	2.43895e-09
0.869318	1.5268e-09		0.869318	1.77387e-09		0.869318	1.39535e-09		0.869318	1.75484e-09		0.869318	2.09981e-09		0.869318	2.40308e-09
0.872212	1.50753e-09		0.872212	1.74747e-09		0.872212	1.37317e-09		0.872212	1.72912e-09		0.872212	2.06611e-09		0.872212	2.37416e-09
0.875106	1.49333e-09		0.875106	1.72803e-09		0.875106	1.35655e-09		0.875106	1.70994e-09		0.875106	2.04124e-09		0.875106	2.35249e-09
0.878	1.48774e-09		0.878	1.72041e-09		0.878	1.34986e-09		0.878	1.70233e-09		0.878	2.03145e-09		0.878	2.34387e-09

## Sheet: no2 distribution
SN 0			SN 0.2			SN 0.4			SN 0.6			SN 0.8			SN 1
Axial distance	no2 mass fraction		Axial distance	no2 mass fraction		Axial distance	no2 mass fraction		Axial distance	no2 mass fraction		Axial distance	no2 mass fraction		Axial distance	no2 mass fraction
0.00115113	3.434e-09		0.00115113	3.46064e-09		0.00115113	1.51995e-09		0.00115113	8.98511e-10		0.00115113	4.62744e-10		0.00115113	2.74627e-10
0.00404502	4.92275e-09		0.00404502	4.85476e-09		0.00404502	1.8471e-09		0.00404502	1.09954e-09		0.00404502	5.04906e-10		0.00404502	2.99074e-10
0.00693891	6.62732e-09		0.00693891	6.39649e-09		0.00693891	2.19116e-09		0.00693891	1.29098e-09		0.00693891	5.40166e-10		0.00693891	3.17432e-10
0.0098328	8.453e-09		0.0098328	7.99894e-09		0.0098328	2.57798e-09		0.0098328	1.44933e-09		0.0098328	5.69954e-10		0.0098328	3.25024e-10
0.0127267	1.03115e-08		0.0127267	9.55503e-09		0.0127267	3.03213e-09		0.0127267	1.56897e-09		0.0127267	5.87281e-10		0.0127267	3.20434e-10
0.0156206	1.21026e-08		0.0156206	1.09613e-08		0.0156206	3.55963e-09		0.0156206	1.6419e-09		0.0156206	5.86968e-10		0.0156206	3.05207e-10
0.0185145	1.372e-08		0.0185145	1.21329e-08		0.0185145	4.13967e-09		0.0185145	1.66123e-09		0.0185145	5.69425e-10		0.0185145	2.82143e-10
0.0214084	1.5077e-08		0.0214084	1.30188e-08		0.0214084	4.72684e-09		0.0214084	1.6306e-09		0.0214084	5.40752e-10		0.0214084	2.55543e-10
0.0243023	1.6125e-08		0.0243023	1.3616e-08		0.0243023	5.26697e-09		0.0243023	1.5641e-09		0.0243023	5.04511e-10		0.0243023	2.30108e-10
0.0271961	1.68593e-08		0.0271961	1.39597e-08		0.0271961	5.71949e-09		0.0271961	1.47532e-09		0.0271961	4.62991e-10		0.0271961	2.15632e-10
0.03009	1.73088e-08		0.03009	1.41106e-08		0.03009	6.06273e-09		0.03009	1.37846e-09		0.03009	4.2798e-10		0.03009	2.18004e-10
0.0329839	1.75216e-08		0.0329839	1.41387e-08		0.0329839	6.29103e-09		0.0329839	1.27737e-09		0.0329839	4.15611e-10		0.0329839	2.38959e-10
0.0358778	1.75557e-08		0.0358778	1.41093e-08		0.0358778	6.41237e-09		0.0358778	1.17298e-09		0.0358778	4.36674e-10		0.0358778	2.8429e-10
0.0387717	1.74755e-08		0.0387717	1.40788e-08		0.0387717	6.43941e-09		0.0387717	1.09506e-09		0.0387717	5.11739e-10		0.0387717	3.61887e-10
0.0416656	1.73357e-08		0.0416656	1.4091e-08		0.0416656	6.40225e-09		0.0416656	1.09702e-09		0.0416656	6.97951e-10		0.0416656	4.8021e-10
0.0445595	1.71783e-08		0.0445595	1.41763e-08		0.0445595	6.30859e-09		0.0445595	1.30622e-09		0.0445595	1.11603e-09		0.0445595	6.52568e-10
0.0474534	1.70432e-08		0.0474534	1.43538e-08		0.0474534	6.15114e-09		0.0474534	2.14078e-09		0.0474534	2.09016e-09		0.0474534	9.08838e-10
0.0503473	1.6962e-08		0.0503473	1.46323e-08		0.0503473	5.9495e-09		0.0503473	4.68577e-09		0.0503473	4.33537e-09		0.0503473	1.33283e-09
0.0532412	1.69562e-08		0.0532412	1.50123e-08		0.0532412	5.72017e-09		0.0532412	1.1201e-08		0.0532412	9.64726e-09		0.0532412	2.15725e-09
0.056135	1.70378e-08		0.056135	1.5483e-08		0.056135	5.47154e-09		0.056135	2.731e-08		0.056135	2.19063e-08		0.056135	3.9447e-09
0.0590289	1.72133e-08		0.0590289	1.60245e-08		0.0590289	5.20992e-09		0.0590289	6.11203e-08		0.0590289	4.70987e-08		0.0590289	8.03846e-09
0.0619228	1.74859e-08		0.0619228	1.6615e-08		0.0619228	4.94221e-09		0.0619228	1.27101e-07		0.0619228	9.76463e-08		0.0619228	1.69552e-08
0.0648167	1.78528e-08		0.0648167	1.72302e-08		0.0648167	4.68123e-09		0.0648167	2.55459e-07		0.0648167	1.97529e-07		0.0648167	3.53245e-08
0.0677106	1.83067e-08		0.0677106	1.78454e-08		0.0677106	4.42711e-09		0.0677106	4.86983e-07		0.0677106	3.8223e-07		0.0677106	7.15202e-08
0.0706045	1.88375e-08		0.0706045	1.84375e-08		0.0706045	4.19464e-09		0.0706045	8.47904e-07		0.0706045	6.88649e-07		0.0706045	1.40937e-07
0.0734984	1.94324e-08		0.0734984	1.89884e-08		0.0734984	4.07576e-09		0.0734984	1.31506e-06		0.0734984	1.12469e-06		0.0734984	2.67954e-07
0.0763923	2.00773e-08		0.0763923	1.94852e-08		0.0763923	4.28047e-09		0.0763923	1.81607e-06		0.0763923	1.6426e-06		0.0763923	4.82541e-07
0.0792862	2.07579e-08		0.0792862	1.992e-08		0.0792862	5.52663e-09		0.0792862	2.27325e-06		0.0792862	2.16003e-06		0.0792862	8.07806e-07
0.0821801	2.14727e-08		0.0821801	2.02903e-08		0.0821801	9.72889e-09		0.0821801	2.59648e-06		0.0821801	2.56025e-06		0.0821801	1.23796e-06
0.085074	2.21907e-08		0.085074	2.05979e-08		0.085074	2.05943e-08		0.085074	2.76061e-06		0.085074	2.783e-06		0.085074	1.72812e-06
0.085074	2.21907e-08		0.085074	2.05979e-08		0.085074	2.05943e-08		0.085074	2.76061e-06		0.085074	2.783e-06		0.085074	1.72812e-06
0.0879678	2.28838e-08		0.0879678	2.0848e-08		0.0879678	4.51065e-08		0.0879678	2.8259e-06		0.0879678	2.87983e-06		0.0879678	2.21442e-06
0.0908617	2.35561e-08		0.0908617	2.10496e-08		0.0908617	9.47461e-08		0.0908617	2.83906e-06		0.0908617	2.91182e-06		0.0908617	2.59553e-06
0.0937556	2.41995e-08		0.0937556	2.12156e-08		0.0937556	1.85046e-07		0.0937556	2.8252e-06		0.0937556	2.91273e-06		0.0937556	2.8185e-06
0.0966495	2.48059e-08		0.0966495	2.13535e-08		0.0966495	3.3291e-07		0.0966495	2.79762e-06		0.0966495	2.89933e-06		0.0966495	2.92975e-06
0.0995434	2.5368e-08		0.0995434	2.14714e-08		0.0995434	5.51015e-07		0.0995434	2.76408e-06		0.0995434	2.88049e-06		0.0995434	2.98079e-06
0.102437	2.58795e-08		0.102437	2.15825e-08		0.102437	8.41374e-07		0.102437	2.72782e-06		0.102437	2.86008e-06		0.102437	3.00196e-06
0.105331	2.63352e-08		0.105331	2.16957e-08		0.105331	1.1926e-06		0.105331	2.69147e-06		0.105331	2.83973e-06		0.105331	3.00677e-06
0.108225	2.67323e-08		0.108225	2.18185e-08		0.108225	1.58375e-06		0.108225	2.65632e-06		0.108225	2.82054e-06		0.108225	3.003e-06
0.111119	2.70708e-08		0.111119	2.19572e-08		0.111119	1.99031e-06		0.111119	2.6236e-06		0.111119	2.80304e-06		0.111119	2.99502e-06
0.114013	2.7357e-08		0.114013	2.21166e-08		0.114013	2.36073e-06		0.114013	2.59443e-06		0.114013	2.78726e-06		0.114013	2.98532e-06
0.116907	2.75897e-08		0.116907	2.23004e-08		0.116907	2.63146e-06		0.116907	2.56873e-06		0.116907	2.7736e-06		0.116907	2.9758e-06
0.119801	2.77714e-08		0.119801	2.25106e-08		0.119801	2.78784e-06		0.119801	2.5463e-06		0.119801	2.76228e-06		0.119801	2.96692e-06
0.122695	2.79107e-08		0.122695	2.27473e-08		0.122695	2.85567e-06		0.122695	2.52723e-06		0.122695	2.75287e-06		0.122695	2.95868e-06
0.125588	2.8012e-08		0.125588	2.3012e-08		0.125588	2.86385e-06		0.125588	2.51137e-06		0.125588	2.74499e-06		0.125588	2.95137e-06
0.128482	2.80861e-08		0.128482	2.33087e-08		0.128482	2.83629e-06		0.128482	2.49823e-06		0.128482	2.73839e-06		0.128482	2.9451e-06
0.131376	2.81388e-08		0.131376	2.36292e-08		0.131376	2.78875e-06		0.131376	2.48735e-06		0.131376	2.73285e-06		0.131376	2.93966e-06
0.13427	2.81756e-08		0.13427	2.39758e-08		0.13427	2.73104e-06		0.13427	2.4783e-06		0.13427	2.72813e-06		0.13427	2.93485e-06
0.137164	2.82037e-08		0.137164	2.43556e-08		0.137164	2.6706e-06		0.137164	2.47074e-06		0.137164	2.72405e-06		0.137164	2.93057e-06
0.140058	2.82406e-08		0.140058	2.47521e-08		0.140058	2.61164e-06		0.140058	2.46441e-06		0.140058	2.72046e-06		0.140058	2.92673e-06
0.142952	2.82894e-08		0.142952	2.51524e-08		0.142952	2.55694e-06		0.142952	2.45905e-06		0.142952	2.71724e-06		0.142952	2.92322e-06
0.145846	2.83407e-08		0.145846	2.55521e-08		0.145846	2.50734e-06		0.145846	2.45446e-06		0.145846	2.71429e-06		0.145846	2.91994e-06
0.14874	2.83988e-08		0.14874	2.59486e-08		0.14874	2.46288e-06		0.14874	2.45046e-06		0.14874	2.71155e-06		0.14874	2.91681e-06
0.151633	2.84693e-08		0.151633	2.63406e-08		0.151633	2.42356e-06		0.151633	2.44693e-06		0.151633	2.70894e-06		0.151633	2.9138e-06
0.154527	2.85568e-08		0.154527	2.67312e-08		0.154527	2.38898e-06		0.154527	2.44373e-06		0.154527	2.70644e-06		0.154527	2.91086e-06
0.157421	2.86665e-08		0.157421	2.71137e-08		0.157421	2.35883e-06		0.157421	2.44077e-06		0.157421	2.70401e-06		0.157421	2.90795e-06
0.160315	2.87997e-08		0.160315	2.74841e-08		0.160315	2.33258e-06		0.160315	2.43798e-06		0.160315	2.70162e-06		0.160315	2.90506e-06
0.163209	2.8957e-08		0.163209	2.78483e-08		0.163209	2.30962e-06		0.163209	2.43531e-06		0.163209	2.69925e-06		0.163209	2.90218e-06
0.166103	2.91493e-08		0.166103	2.8218e-08		0.166103	2.2897e-06		0.166103	2.43269e-06		0.166103	2.6969e-06		0.166103	2.89927e-06
0.166103	2.91493e-08		0.166103	2.8218e-08		0.166103	2.2897e-06		0.166103	2.43269e-06		0.166103	2.6969e-06		0.166103	2.89927e-06
0.168997	2.93836e-08		0.168997	2.86057e-08		0.168997	2.27255e-06		0.168997	2.43015e-06		0.168997	2.69453e-06		0.168997	2.89631e-06
0.171891	2.96586e-08		0.171891	2.90175e-08		0.171891	2.25783e-06		0.171891	2.4277e-06		0.171891	2.69213e-06		0.171891	2.89325e-06
0.174785	2.99721e-08		0.174785	2.94479e-08		0.174785	2.24533e-06		0.174785	2.42531e-06		0.174785	2.68969e-06		0.174785	2.89009e-06
0.177678	3.03208e-08		0.177678	2.98872e-08		0.177678	2.23482e-06		0.177678	2.423e-06		0.177678	2.6872e-06		0.177678	2.88686e-06
0.180572	3.07071e-08		0.180572	3.03401e-08		0.180572	2.22599e-06		0.180572	2.42076e-06		0.180572	2.68465e-06		0.180572	2.88353e-06
0.183466	3.11233e-08		0.183466	3.08121e-08		0.183466	2.21858e-06		0.183466	2.41856e-06		0.183466	2.68207e-06		0.183466	2.88013e-06
0.18636	3.15652e-08		0.18636	3.13034e-08		0.18636	2.21236e-06		0.18636	2.41639e-06		0.18636	2.67947e-06		0.18636	2.87664e-06
0.189254	3.20388e-08		0.189254	3.18123e-08		0.189254	2.20715e-06		0.189254	2.41424e-06		0.189254	2.67684e-06		0.189254	2.87306e-06
0.192148	3.25369e-08		0.192148	3.23402e-08		0.192148	2.20278e-06		0.192148	2.4121e-06		0.192148	2.67419e-06		0.192148	2.86942e-06
0.195042	3.30529e-08		0.195042	3.28911e-08		0.195042	2.19908e-06		0.195042	2.40997e-06		0.195042	2.67151e-06		0.195042	2.86574e-06
0.197936	3.35902e-08		0.197936	3.34706e-08		0.197936	2.19593e-06		0.197936	2.40784e-06		0.197936	2.6688e-06		0.197936	2.86203e-06
0.20083	3.41525e-08		0.20083	3.40775e-08		0.20083	2.19322e-06		0.20083	2.40571e-06		0.20083	2.66605e-06		0.20083	2.8583e-06
0.203723	3.47417e-08		0.203723	3.47118e-08		0.203723	2.19085e-06		0.203723	2.40357e-06		0.203723	2.66327e-06		0.203723	2.85454e-06
0.206617	3.53604e-08		0.206617	3.53839e-08		0.206617	2.18872e-06		0.206617	2.40143e-06		0.206617	2.66046e-06		0.206617	2.85076e-06
0.209511	3.60106e-08		0.209511	3.61051e-08		0.209511	2.18682e-06		0.209511	2.39928e-06		0.209511	2.65762e-06		0.209511	2.84695e-06
0.212405	3.6696e-08		0.212405	3.68857e-08		0.212405	2.18511e-06		0.212405	2.39712e-06		0.212405	2.65477e-06		0.212405	2.84313e-06
0.215299	3.74178e-08		0.215299	3.77346e-08		0.215299	2.18359e-06		0.215299	2.39497e-06		0.215299	2.65192e-06		0.215299	2.83929e-06
0.215299	3.74178e-08		0.215299	3.77346e-08		0.215299	2.18359e-06		0.215299	2.39497e-06		0.215299	2.65192e-06		0.215299	2.83929e-06
0.218193	3.81851e-08		0.218193	3.86658e-08		0.218193	2.18216e-06		0.218193	2.39279e-06		0.218193	2.64904e-06		0.218193	2.83541e-06
0.221087	3.90058e-08		0.221087	3.96944e-08		0.221087	2.18072e-06		0.221087	2.39056e-06		0.221087	2.64608e-06		0.221087	2.83147e-06
0.223981	3.98816e-08		0.223981	4.08291e-08		0.223981	2.17922e-06		0.223981	2.38829e-06		0.223981	2.64304e-06		0.223981	2.82746e-06
0.226875	4.0804e-08		0.226875	4.20758e-08		0.226875	2.17763e-06		0.226875	2.38596e-06		0.226875	2.63991e-06		0.226875	2.82335e-06
0.229768	4.17725e-08		0.229768	4.34318e-08		0.229768	2.17597e-06		0.229768	2.38358e-06		0.229768	2.63671e-06		0.229768	2.81916e-06
0.232662	4.28003e-08		0.232662	4.49025e-08		0.232662	2.17424e-06		0.232662	2.38116e-06		0.232662	2.63342e-06		0.232662	2.81489e-06
0.235556	4.38928e-08		0.235556	4.65046e-08		0.235556	2.17245e-06		0.235556	2.37869e-06		0.235556	2.63006e-06		0.235556	2.81054e-06
0.23845	4.50457e-08		0.23845	4.82443e-08		0.23845	2.1706e-06		0.23845	2.37618e-06		0.23845	2.62664e-06		0.23845	2.8061e-06
0.241344	4.62545e-08		0.241344	5.012e-08		0.241344	2.16871e-06		0.241344	2.37363e-06		0.241344	2.62314e-06		0.241344	2.80159e-06
0.244238	4.75253e-08		0.244238	5.2132e-08		0.244238	2.16678e-06		0.244238	2.37105e-06		0.244238	2.61957e-06		0.244238	2.797e-06
0.247132	4.88635e-08		0.247132	5.4281e-08		0.247132	2.16481e-06		0.247132	2.36843e-06		0.247132	2.61594e-06		0.247132	2.79234e-06
0.250026	5.02733e-08		0.250026	5.65741e-08		0.250026	2.1628e-06		0.250026	2.36577e-06		0.250026	2.61222e-06		0.250026	2.78762e-06
0.25292	5.17587e-08		0.25292	5.90287e-08		0.25292	2.16077e-06		0.25292	2.36308e-06		0.25292	2.60844e-06		0.25292	2.78286e-06
0.255814	5.33212e-08		0.255814	6.16648e-08		0.255814	2.15871e-06		0.255814	2.36035e-06		0.255814	2.60461e-06		0.255814	2.77808e-06
0.258707	5.49688e-08		0.258707	6.45019e-08		0.258707	2.15663e-06		0.258707	2.35757e-06		0.258707	2.60077e-06		0.258707	2.77326e-06
0.261601	5.67114e-08		0.261601	6.75587e-08		0.261601	2.15453e-06		0.261601	2.35475e-06		0.261601	2.59693e-06		0.261601	2.76841e-06
0.264495	5.85548e-08		0.264495	7.08673e-08		0.264495	2.1524e-06		0.264495	2.35188e-06		0.264495	2.59309e-06		0.264495	2.76352e-06
0.267389	6.05016e-08		0.267389	7.44538e-08		0.267389	2.15026e-06		0.267389	2.34899e-06		0.267389	2.58923e-06		0.267389	2.7586e-06
0.270283	6.25543e-08		0.270283	7.83248e-08		0.270283	2.1481e-06		0.270283	2.34614e-06		0.270283	2.58536e-06		0.270283	2.75365e-06
0.273177	6.47238e-08		0.273177	8.24849e-08		0.273177	2.14592e-06		0.273177	2.34331e-06		0.273177	2.58149e-06		0.273177	2.74865e-06
0.276071	6.70232e-08		0.276071	8.69328e-08		0.276071	2.14373e-06		0.276071	2.34051e-06		0.276071	2.5776e-06		0.276071	2.74363e-06
0.278965	6.94645e-08		0.278965	9.16708e-08		0.278965	2.14153e-06		0.278965	2.33772e-06		0.278965	2.57371e-06		0.278965	2.73856e-06
0.281859	7.2066e-08		0.281859	9.67276e-08		0.281859	2.13931e-06		0.281859	2.33496e-06		0.281859	2.5698e-06		0.281859	2.73346e-06
0.284752	7.48476e-08		0.284752	1.02127e-07		0.284752	2.13708e-06		0.284752	2.33222e-06		0.284752	2.56589e-06		0.284752	2.72833e-06
0.287646	7.78196e-08		0.287646	1.0788e-07		0.287646	2.13484e-06		0.287646	2.3295e-06		0.287646	2.56196e-06		0.287646	2.72316e-06
0.29054	8.09921e-08		0.29054	1.14009e-07		0.29054	2.13259e-06		0.29054	2.32679e-06		0.29054	2.55802e-06		0.29054	2.71795e-06
0.293434	8.43841e-08		0.293434	1.20538e-07		0.293434	2.13032e-06		0.293434	2.3241e-06		0.293434	2.55406e-06		0.293434	2.71271e-06
0.296328	8.8018e-08		0.296328	1.27508e-07		0.296328	2.12805e-06		0.296328	2.32143e-06		0.296328	2.55009e-06		0.296328	2.70741e-06
0.299222	9.19192e-08		0.299222	1.3494e-07		0.299222	2.12577e-06		0.299222	2.31876e-06		0.299222	2.5461e-06		0.299222	2.70202e-06
0.302116	9.61171e-08		0.302116	1.42854e-07		0.302116	2.12348e-06		0.302116	2.31612e-06		0.302116	2.54208e-06		0.302116	2.69655e-06
0.30501	1.00643e-07		0.30501	1.51267e-07		0.30501	2.12117e-06		0.30501	2.31348e-06		0.30501	2.53805e-06		0.30501	2.69099e-06
0.307904	1.0553e-07		0.307904	1.60179e-07		0.307904	2.11886e-06		0.307904	2.31086e-06		0.307904	2.53398e-06		0.307904	2.68535e-06
0.310797	1.10808e-07		0.310797	1.69612e-07		0.310797	2.11653e-06		0.310797	2.30825e-06		0.310797	2.52989e-06		0.310797	2.67963e-06
0.313691	1.16518e-07		0.313691	1.79603e-07		0.313691	2.11419e-06		0.313691	2.30564e-06		0.313691	2.52572e-06		0.313691	2.67382e-06
0.313691	1.16518e-07		0.313691	1.79603e-07		0.313691	2.11419e-06		0.313691	2.30564e-06		0.313691	2.52572e-06		0.313691	2.67382e-06
0.316585	1.22693e-07		0.316585	1.90194e-07		0.316585	2.11181e-06		0.316585	2.30295e-06		0.316585	2.52149e-06		0.316585	2.66797e-06
0.319479	1.29371e-07		0.319479	2.01409e-07		0.319479	2.10938e-06		0.319479	2.30011e-06		0.319479	2.51722e-06		0.319479	2.66214e-06
0.322373	1.36599e-07		0.322373	2.13271e-07		0.322373	2.10693e-06		0.322373	2.29715e-06		0.322373	2.51291e-06		0.322373	2.6563e-06
0.325267	1.44411e-07		0.325267	2.25803e-07		0.325267	2.10444e-06		0.325267	2.2941e-06		0.325267	2.50857e-06		0.325267	2.65046e-06
0.328161	1.52847e-07		0.328161	2.39068e-07		0.328161	2.10194e-06		0.328161	2.29096e-06		0.328161	2.50419e-06		0.328161	2.6446e-06
0.331055	1.61955e-07		0.331055	2.53127e-07		0.331055	2.09942e-06		0.331055	2.28775e-06		0.331055	2.49979e-06		0.331055	2.63872e-06
0.333949	1.71787e-07		0.333949	2.6803e-07		0.333949	2.0969e-06		0.333949	2.28448e-06		0.333949	2.49535e-06		0.333949	2.6328e-06
0.336842	1.82394e-07		0.336842	2.83813e-07		0.336842	2.09436e-06		0.336842	2.28115e-06		0.336842	2.4909e-06		0.336842	2.6269e-06
0.339736	1.9383e-07		0.339736	3.00497e-07		0.339736	2.09183e-06		0.339736	2.27778e-06		0.339736	2.48642e-06		0.339736	2.62103e-06
0.34263	2.0615e-07		0.34263	3.18128e-07		0.34263	2.08929e-06		0.34263	2.2744e-06		0.34263	2.48191e-06		0.34263	2.61523e-06
0.345524	2.1941e-07		0.345524	3.36767e-07		0.345524	2.08675e-06		0.345524	2.271e-06		0.345524	2.47739e-06		0.345524	2.60948e-06
0.348418	2.33668e-07		0.348418	3.56479e-07		0.348418	2.08422e-06		0.348418	2.26759e-06		0.348418	2.47284e-06		0.348418	2.60379e-06
0.351312	2.48984e-07		0.351312	3.77392e-07		0.351312	2.08168e-06		0.351312	2.26418e-06		0.351312	2.46828e-06		0.351312	2.59816e-06
0.354206	2.65419e-07		0.354206	3.99626e-07		0.354206	2.07915e-06		0.354206	2.26077e-06		0.354206	2.46368e-06		0.354206	2.59259e-06
0.3571	2.83045e-07		0.3571	4.23222e-07		0.3571	2.07663e-06		0.3571	2.25735e-06		0.3571	2.45906e-06		0.3571	2.5871e-06
0.359994	3.01949e-07		0.359994	4.48233e-07		0.359994	2.07411e-06		0.359994	2.25394e-06		0.359994	2.4544e-06		0.359994	2.58167e-06
0.362887	3.2224e-07		0.362887	4.74711e-07		0.362887	2.07159e-06		0.362887	2.25052e-06		0.362887	2.44971e-06		0.362887	2.57632e-06
0.365781	3.44012e-07		0.365781	5.0275e-07		0.365781	2.06908e-06		0.365781	2.24711e-06		0.365781	2.44503e-06		0.365781	2.57106e-06
0.368675	3.67354e-07		0.368675	5.32528e-07		0.368675	2.06658e-06		0.368675	2.2437e-06		0.368675	2.44041e-06		0.368675	2.5659e-06
0.371569	3.92373e-07		0.371569	5.64251e-07		0.371569	2.06409e-06		0.371569	2.24028e-06		0.371569	2.43585e-06		0.371569	2.56083e-06
0.374463	4.19175e-07		0.374463	5.98131e-07		0.374463	2.06161e-06		0.374463	2.23687e-06		0.374463	2.43134e-06		0.374463	2.55587e-06
0.377357	4.47864e-07		0.377357	6.34367e-07		0.377357	2.05913e-06		0.377357	2.23347e-06		0.377357	2.42689e-06		0.377357	2.55094e-06
0.380251	4.78552e-07		0.380251	6.73151e-07		0.380251	2.05666e-06		0.380251	2.23006e-06		0.380251	2.42251e-06		0.380251	2.54596e-06
0.383145	5.11338e-07		0.383145	7.14735e-07		0.383145	2.0542e-06		0.383145	2.22665e-06		0.383145	2.41818e-06		0.383145	2.54093e-06
0.386039	5.46344e-07		0.386039	7.59526e-07		0.386039	2.05174e-06		0.386039	2.22323e-06		0.386039	2.4139e-06		0.386039	2.53586e-06
0.388932	5.83668e-07		0.388932	8.07892e-07		0.388932	2.04928e-06		0.388932	2.21981e-06		0.388932	2.40968e-06		0.388932	2.53073e-06
0.391826	6.23379e-07		0.391826	8.60296e-07		0.391826	2.04681e-06		0.391826	2.21638e-06		0.391826	2.40552e-06		0.391826	2.52555e-06
0.39472	6.65571e-07		0.39472	9.17349e-07		0.39472	2.04435e-06		0.39472	2.21292e-06		0.39472	2.4014e-06		0.39472	2.5203e-06
0.397614	7.10372e-07		0.397614	9.79819e-07		0.397614	2.04187e-06		0.397614	2.20944e-06		0.397614	2.39732e-06		0.397614	2.51499e-06
0.400508	7.57964e-07		0.400508	1.04895e-06		0.400508	2.03938e-06		0.400508	2.20593e-06		0.400508	2.39328e-06		0.400508	2.50959e-06
0.403402	8.08553e-07		0.403402	1.12683e-06		0.403402	2.03691e-06		0.403402	2.20236e-06		0.403402	2.38928e-06		0.403402	2.5041e-06
0.403402	8.08553e-07		0.403402	1.12683e-06		0.403402	2.03691e-06		0.403402	2.20236e-06		0.403402	2.38928e-06		0.403402	2.5041e-06
0.406296	8.62389e-07		0.406296	1.2166e-06		0.406296	2.03443e-06		0.406296	2.19876e-06		0.406296	2.38525e-06		0.406296	2.49853e-06
0.40919	9.19793e-07		0.40919	1.3223e-06		0.40919	2.03192e-06		0.40919	2.19514e-06		0.40919	2.38115e-06		0.40919	2.4929e-06
0.412084	9.81161e-07		0.412084	1.44586e-06		0.412084	2.02938e-06		0.412084	2.1915e-06		0.412084	2.37698e-06		0.412084	2.48722e-06
0.414977	1.04712e-06		0.414977	1.58612e-06		0.414977	2.02681e-06		0.414977	2.18784e-06		0.414977	2.37274e-06		0.414977	2.48149e-06
0.417871	1.11831e-06		0.417871	1.73937e-06		0.417871	2.02421e-06		0.417871	2.18414e-06		0.417871	2.36843e-06		0.417871	2.47572e-06
0.420765	1.19562e-06		0.420765	1.9025e-06		0.420765	2.02158e-06		0.420765	2.18042e-06		0.420765	2.36404e-06		0.420765	2.46992e-06
0.423659	1.28064e-06		0.423659	2.07024e-06		0.423659	2.01893e-06		0.423659	2.17667e-06		0.423659	2.35958e-06		0.423659	2.46408e-06
0.426553	1.37613e-06		0.426553	2.23974e-06		0.426553	2.01624e-06		0.426553	2.17288e-06		0.426553	2.35504e-06		0.426553	2.45821e-06
0.429447	1.48623e-06		0.429447	2.41022e-06		0.429447	2.01353e-06		0.429447	2.16907e-06		0.429447	2.35044e-06		0.429447	2.4523e-06
0.432341	1.61363e-06		0.432341	2.5782e-06		0.432341	2.0108e-06		0.432341	2.16523e-06		0.432341	2.34578e-06		0.432341	2.44636e-06
0.435235	1.75856e-06		0.435235	2.74147e-06		0.435235	2.00804e-06		0.435235	2.16137e-06		0.435235	2.34106e-06		0.435235	2.4404e-06
0.438129	1.91424e-06		0.438129	2.89859e-06		0.438129	2.00527e-06		0.438129	2.15749e-06		0.438129	2.3363e-06		0.438129	2.43441e-06
0.441023	2.07586e-06		0.441023	3.04928e-06		0.441023	2.00249e-06		0.441023	2.15359e-06		0.441023	2.33149e-06		0.441023	2.4284e-06
0.443916	2.24247e-06		0.443916	3.19218e-06		0.443916	1.99969e-06		0.443916	2.14967e-06		0.443916	2.32665e-06		0.443916	2.42238e-06
0.44681	2.40983e-06		0.44681	3.32651e-06		0.44681	1.99689e-06		0.44681	2.14574e-06		0.44681	2.32178e-06		0.44681	2.41635e-06
0.449704	2.57493e-06		0.449704	3.45128e-06		0.449704	1.99407e-06		0.449704	2.14179e-06		0.449704	2.31688e-06		0.449704	2.41031e-06
0.452598	2.73489e-06		0.452598	3.5658e-06		0.452598	1.99125e-06		0.452598	2.13783e-06		0.452598	2.31195e-06		0.452598	2.40425e-06
0.455492	2.88852e-06		0.455492	3.67067e-06		0.455492	1.98842e-06		0.455492	2.13385e-06		0.455492	2.30701e-06		0.455492	2.39819e-06
0.458386	3.03488e-06		0.458386	3.76606e-06		0.458386	1.98559e-06		0.458386	2.12986e-06		0.458386	2.30205e-06		0.458386	2.39212e-06
0.46128	3.17203e-06		0.46128	3.8513e-06		0.46128	1.98275e-06		0.46128	2.12585e-06		0.46128	2.29707e-06		0.46128	2.38604e-06
0.464174	3.29961e-06		0.464174	3.92611e-06		0.464174	1.97992e-06		0.464174	2.12184e-06		0.464174	2.29207e-06		0.464174	2.37997e-06
0.467068	3.41808e-06		0.467068	3.99099e-06		0.467068	1.97708e-06		0.467068	2.11784e-06		0.467068	2.28706e-06		0.467068	2.37389e-06
0.469961	3.52649e-06		0.469961	4.04676e-06		0.469961	1.97424e-06		0.469961	2.11385e-06		0.469961	2.28204e-06		0.469961	2.36782e-06
0.472855	3.6234e-06		0.472855	4.09414e-06		0.472855	1.9714e-06		0.472855	2.10986e-06		0.472855	2.277e-06		0.472855	2.36175e-06
0.475749	3.71027e-06		0.475749	4.13305e-06		0.475749	1.96857e-06		0.475749	2.1059e-06		0.475749	2.27196e-06		0.475749	2.35569e-06
0.478643	3.78646e-06		0.478643	4.16418e-06		0.478643	1.96574e-06		0.478643	2.10195e-06		0.478643	2.26692e-06		0.478643	2.34964e-06
0.481537	3.85016e-06		0.481537	4.18789e-06		0.481537	1.96291e-06		0.481537	2.09801e-06		0.481537	2.26187e-06		0.481537	2.3436e-06
0.484431	3.90252e-06		0.484431	4.20427e-06		0.484431	1.96008e-06		0.484431	2.0941e-06		0.484431	2.25683e-06		0.484431	2.33758e-06
0.487325	3.94542e-06		0.487325	4.21429e-06		0.487325	1.95726e-06		0.487325	2.09021e-06		0.487325	2.25178e-06		0.487325	2.33157e-06
0.490219	3.97969e-06		0.490219	4.21851e-06		0.490219	1.95443e-06		0.490219	2.08634e-06		0.490219	2.24674e-06		0.490219	2.32561e-06
0.493113	4.00579e-06		0.493113	4.21699e-06		0.493113	1.9516e-06		0.493113	2.0825e-06		0.493113	2.2417e-06		0.493113	2.31968e-06
0.496006	4.02481e-06		0.496006	4.21137e-06		0.496006	1.94878e-06		0.496006	2.07869e-06		0.496006	2.23667e-06		0.496006	2.3138e-06
0.4989	4.03686e-06		0.4989	4.2019e-06		0.4989	1.94596e-06		0.4989	2.0749e-06		0.4989	2.23164e-06		0.4989	2.30796e-06
0.501794	4.04085e-06		0.501794	4.18836e-06		0.501794	1.94314e-06		0.501794	2.07115e-06		0.501794	2.22662e-06		0.501794	2.30217e-06
0.504688	4.03842e-06		0.504688	4.16992e-06		0.504688	1.94032e-06		0.504688	2.06744e-06		0.504688	2.22163e-06		0.504688	2.29644e-06
0.507582	4.03198e-06		0.507582	4.14671e-06		0.507582	1.93751e-06		0.507582	2.06377e-06		0.507582	2.21667e-06		0.507582	2.29076e-06
0.510476	4.0207e-06		0.510476	4.12111e-06		0.510476	1.9347e-06		0.510476	2.06014e-06		0.510476	2.21173e-06		0.510476	2.28515e-06
0.51337	4.0037e-06		0.51337	4.0933e-06		0.51337	1.93188e-06		0.51337	2.05658e-06		0.51337	2.20682e-06		0.51337	2.27961e-06
0.516264	3.9822e-06		0.516264	4.06412e-06		0.516264	1.92907e-06		0.516264	2.05308e-06		0.516264	2.20195e-06		0.516264	2.27414e-06
0.519158	3.95766e-06		0.519158	4.03407e-06		0.519158	1.92626e-06		0.519158	2.04968e-06		0.519158	2.19712e-06		0.519158	2.26873e-06
0.522051	3.93024e-06		0.522051	4.00104e-06		0.522051	1.92344e-06		0.522051	2.04632e-06		0.522051	2.19233e-06		0.522051	2.2634e-06
0.524945	3.89985e-06		0.524945	3.96451e-06		0.524945	1.92061e-06		0.524945	2.04292e-06		0.524945	2.18759e-06		0.524945	2.25817e-06
0.524945	3.89985e-06		0.524945	3.96451e-06		0.524945	1.92061e-06		0.524945	2.04292e-06		0.524945	2.18759e-06		0.524945	2.25817e-06
0.527839	3.86681e-06		0.527839	3.92615e-06		0.527839	1.91779e-06		0.527839	2.03952e-06		0.527839	2.18288e-06		0.527839	2.25298e-06
0.530733	3.83201e-06		0.530733	3.8868e-06		0.530733	1.91497e-06		0.530733	2.03614e-06		0.530733	2.17819e-06		0.530733	2.24778e-06
0.533627	3.79545e-06		0.533627	3.84663e-06		0.533627	1.91216e-06		0.533627	2.03275e-06		0.533627	2.17351e-06		0.533627	2.24256e-06
0.536521	3.75729e-06		0.536521	3.80574e-06		0.536521	1.90935e-06		0.536521	2.02938e-06		0.536521	2.16885e-06		0.536521	2.23733e-06
0.539415	3.71795e-06		0.539415	3.76438e-06		0.539415	1.90656e-06		0.539415	2.02599e-06		0.539415	2.16419e-06		0.539415	2.2321e-06
0.542309	3.67762e-06		0.542309	3.72271e-06		0.542309	1.90378e-06		0.542309	2.0226e-06		0.542309	2.15954e-06		0.542309	2.22686e-06
0.545203	3.63631e-06		0.545203	3.68088e-06		0.545203	1.901e-06		0.545203	2.01919e-06		0.545203	2.15489e-06		0.545203	2.22162e-06
0.548096	3.5947e-06		0.548096	3.63911e-06		0.548096	1.89823e-06		0.548096	2.01576e-06		0.548096	2.15025e-06		0.548096	2.21639e-06
0.55099	3.55298e-06		0.55099	3.59761e-06		0.55099	1.89547e-06		0.55099	2.01232e-06		0.55099	2.1456e-06		0.55099	2.21115e-06
0.553884	3.51082e-06		0.553884	3.55641e-06		0.553884	1.89271e-06		0.553884	2.00885e-06		0.553884	2.14096e-06		0.553884	2.20591e-06
0.556778	3.4681e-06		0.556778	3.51573e-06		0.556778	1.88996e-06		0.556778	2.00536e-06		0.556778	2.13632e-06		0.556778	2.20068e-06
0.559672	3.42553e-06		0.559672	3.47581e-06		0.559672	1.88721e-06		0.559672	2.00185e-06		0.559672	2.13168e-06		0.559672	2.19544e-06
0.562566	3.38373e-06		0.562566	3.43667e-06		0.562566	1.88446e-06		0.562566	1.99832e-06		0.562566	2.12704e-06		0.562566	2.19021e-06
0.56546	3.34218e-06		0.56546	3.39824e-06		0.56546	1.88171e-06		0.56546	1.99476e-06		0.56546	2.1224e-06		0.56546	2.18499e-06
0.568354	3.30084e-06		0.568354	3.36028e-06		0.568354	1.87897e-06		0.568354	1.99119e-06		0.568354	2.11776e-06		0.568354	2.17978e-06
0.571248	3.26012e-06		0.571248	3.32279e-06		0.571248	1.87622e-06		0.571248	1.98758e-06		0.571248	2.11312e-06		0.571248	2.17458e-06
0.574142	3.22041e-06		0.574142	3.28589e-06		0.574142	1.87347e-06		0.574142	1.98395e-06		0.574142	2.10848e-06		0.574142	2.16939e-06
0.577035	3.18181e-06		0.577035	3.2499e-06		0.577035	1.87072e-06		0.577035	1.98029e-06		0.577035	2.10383e-06		0.577035	2.16422e-06
0.579929	3.14397e-06		0.579929	3.21496e-06		0.579929	1.86796e-06		0.579929	1.97662e-06		0.579929	2.09919e-06		0.579929	2.15906e-06
0.582823	3.1067e-06		0.582823	3.18093e-06		0.582823	1.8652e-06		0.582823	1.97295e-06		0.582823	2.09456e-06		0.582823	2.15392e-06
0.585717	3.06982e-06		0.585717	3.14765e-06		0.585717	1.86244e-06		0.585717	1.96929e-06		0.585717	2.08995e-06		0.585717	2.14879e-06
0.588611	3.03394e-06		0.588611	3.11497e-06		0.588611	1.85968e-06		0.588611	1.96564e-06		0.588611	2.08537e-06		0.588611	2.14369e-06
0.591505	2.99961e-06		0.591505	3.0828e-06		0.591505	1.85691e-06		0.591505	1.96199e-06		0.591505	2.0808e-06		0.591505	2.1386e-06
0.594399	2.96656e-06		0.594399	3.05116e-06		0.594399	1.85413e-06		0.594399	1.95835e-06		0.594399	2.07626e-06		0.594399	2.13354e-06
0.597293	2.93445e-06		0.597293	3.02045e-06		0.597293	1.85136e-06		0.597293	1.95472e-06		0.597293	2.07174e-06		0.597293	2.12849e-06
0.600186	2.90281e-06		0.600186	2.99093e-06		0.600186	1.84857e-06		0.600186	1.9511e-06		0.600186	2.06724e-06		0.600186	2.12348e-06
0.60308	2.87127e-06		0.60308	2.9624e-06		0.60308	1.84578e-06		0.60308	1.94749e-06		0.60308	2.06276e-06		0.60308	2.11848e-06
0.605974	2.83977e-06		0.605974	2.93466e-06		0.605974	1.84299e-06		0.605974	1.9439e-06		0.605974	2.05831e-06		0.605974	2.11351e-06
0.608868	2.80902e-06		0.608868	2.90763e-06		0.608868	1.84019e-06		0.608868	1.94032e-06		0.608868	2.05388e-06		0.608868	2.10857e-06
0.611762	2.77962e-06		0.611762	2.88121e-06		0.611762	1.83739e-06		0.611762	1.93675e-06		0.611762	2.04948e-06		0.611762	2.10365e-06
0.614656	2.75142e-06		0.614656	2.85538e-06		0.614656	1.83459e-06		0.614656	1.9332e-06		0.614656	2.0451e-06		0.614656	2.09876e-06
0.61755	2.72425e-06		0.61755	2.83016e-06		0.61755	1.83178e-06		0.61755	1.92967e-06		0.61755	2.04076e-06		0.61755	2.09391e-06
0.620444	2.69784e-06		0.620444	2.80537e-06		0.620444	1.82896e-06		0.620444	1.92615e-06		0.620444	2.03644e-06		0.620444	2.08908e-06
0.623338	2.67191e-06		0.623338	2.78096e-06		0.623338	1.82614e-06		0.623338	1.92265e-06		0.623338	2.03214e-06		0.623338	2.08428e-06
0.626231	2.6465e-06		0.626231	2.75727e-06		0.626231	1.82332e-06		0.626231	1.91918e-06		0.626231	2.02788e-06		0.626231	2.07952e-06
0.629125	2.62172e-06		0.629125	2.73456e-06		0.629125	1.82051e-06		0.629125	1.91571e-06		0.629125	2.02365e-06		0.629125	2.07478e-06
0.632019	2.59733e-06		0.632019	2.71272e-06		0.632019	1.8177e-06		0.632019	1.91227e-06		0.632019	2.01945e-06		0.632019	2.07008e-06
0.634913	2.57309e-06		0.634913	2.69161e-06		0.634913	1.81491e-06		0.634913	1.90885e-06		0.634913	2.01528e-06		0.634913	2.06541e-06
0.637807	2.54932e-06		0.637807	2.6711e-06		0.637807	1.81212e-06		0.637807	1.90545e-06		0.637807	2.01115e-06		0.637807	2.06077e-06
0.640701	2.52643e-06		0.640701	2.65107e-06		0.640701	1.80935e-06		0.640701	1.90209e-06		0.640701	2.00706e-06		0.640701	2.05618e-06
0.643595	2.50417e-06		0.643595	2.6313e-06		0.643595	1.80659e-06		0.643595	1.89878e-06		0.643595	2.00305e-06		0.643595	2.05163e-06
0.643595	2.50417e-06		0.643595	2.6313e-06		0.643595	1.80659e-06		0.643595	1.89878e-06		0.643595	2.00305e-06		0.643595	2.05163e-06
0.646489	2.48247e-06		0.646489	2.61184e-06		0.646489	1.80385e-06		0.646489	1.8955e-06		0.646489	1.99912e-06		0.646489	2.0471e-06
0.649383	2.46142e-06		0.649383	2.59282e-06		0.649383	1.80112e-06		0.649383	1.89224e-06		0.649383	1.99521e-06		0.649383	2.04258e-06
0.652277	2.44101e-06		0.652277	2.57416e-06		0.652277	1.79839e-06		0.652277	1.88898e-06		0.652277	1.99133e-06		0.652277	2.03808e-06
0.65517	2.42113e-06		0.65517	2.55592e-06		0.65517	1.79567e-06		0.65517	1.88572e-06		0.65517	1.98747e-06		0.65517	2.03358e-06
0.658064	2.40181e-06		0.658064	2.53817e-06		0.658064	1.79295e-06		0.658064	1.88247e-06		0.658064	1.98362e-06		0.658064	2.02908e-06
0.660958	2.3831e-06		0.660958	2.52086e-06		0.660958	1.79024e-06		0.660958	1.87921e-06		0.660958	1.97978e-06		0.660958	2.0246e-06
0.663852	2.36496e-06		0.663852	2.50395e-06		0.663852	1.78752e-06		0.663852	1.87595e-06		0.663852	1.97595e-06		0.663852	2.02011e-06
0.666746	2.34732e-06		0.666746	2.48745e-06		0.666746	1.78481e-06		0.666746	1.87269e-06		0.666746	1.97211e-06		0.666746	2.01563e-06
0.66964	2.33021e-06		0.66964	2.47141e-06		0.66964	1.78211e-06		0.66964	1.86943e-06		0.66964	1.96827e-06		0.66964	2.01115e-06
0.672534	2.31368e-06		0.672534	2.45581e-06		0.672534	1.7794e-06		0.672534	1.86617e-06		0.672534	1.96443e-06		0.672534	2.00667e-06
0.675428	2.29766e-06		0.675428	2.4406e-06		0.675428	1.77669e-06		0.675428	1.86291e-06		0.675428	1.96059e-06		0.675428	2.00219e-06
0.678322	2.28208e-06		0.678322	2.4258e-06		0.678322	1.77399e-06		0.678322	1.85964e-06		0.678322	1.95675e-06		0.678322	1.99771e-06
0.681215	2.267e-06		0.681215	2.41143e-06		0.681215	1.77128e-06		0.681215	1.85637e-06		0.681215	1.95289e-06		0.681215	1.99322e-06
0.684109	2.25244e-06		0.684109	2.39745e-06		0.684109	1.76858e-06		0.684109	1.8531e-06		0.684109	1.94904e-06		0.684109	1.98872e-06
0.687003	2.23836e-06		0.687003	2.38383e-06		0.687003	1.76587e-06		0.687003	1.84982e-06		0.687003	1.94517e-06		0.687003	1.9842e-06
0.689897	2.22468e-06		0.689897	2.37052e-06		0.689897	1.76316e-06		0.689897	1.84654e-06		0.689897	1.9413e-06		0.689897	1.97967e-06
0.692791	2.21142e-06		0.692791	2.35755e-06		0.692791	1.76044e-06		0.692791	1.84325e-06		0.692791	1.93742e-06		0.692791	1.97514e-06
0.695685	2.19861e-06		0.695685	2.34492e-06		0.695685	1.75771e-06		0.695685	1.83994e-06		0.695685	1.93353e-06		0.695685	1.97062e-06
0.698579	2.18623e-06		0.698579	2.33261e-06		0.698579	1.75498e-06		0.698579	1.83663e-06		0.698579	1.92963e-06		0.698579	1.96611e-06
0.701473	2.17422e-06		0.701473	2.32059e-06		0.701473	1.75225e-06		0.701473	1.83331e-06		0.701473	1.92574e-06		0.701473	1.96161e-06
0.704367	2.16256e-06		0.704367	2.30882e-06		0.704367	1.74952e-06		0.704367	1.82999e-06		0.704367	1.92184e-06		0.704367	1.95713e-06
0.70726	2.15124e-06		0.70726	2.29732e-06		0.70726	1.7468e-06		0.70726	1.82668e-06		0.70726	1.91794e-06		0.70726	1.95266e-06
0.710154	2.14032e-06		0.710154	2.28611e-06		0.710154	1.7441e-06		0.710154	1.82337e-06		0.710154	1.91404e-06		0.710154	1.94821e-06
0.713048	2.12984e-06		0.713048	2.27518e-06		0.713048	1.74139e-06		0.713048	1.82006e-06		0.713048	1.91014e-06		0.713048	1.94378e-06
0.715942	2.1198e-06		0.715942	2.26449e-06		0.715942	1.73869e-06		0.715942	1.81675e-06		0.715942	1.90625e-06		0.715942	1.93938e-06
0.715942	2.1198e-06		0.715942	2.26449e-06		0.715942	1.73869e-06		0.715942	1.81675e-06		0.715942	1.90625e-06		0.715942	1.93938e-06
0.718836	2.11009e-06		0.718836	2.25401e-06		0.718836	1.736e-06		0.718836	1.81344e-06		0.718836	1.90236e-06		0.718836	1.93498e-06
0.72173	2.10063e-06		0.72173	2.24372e-06		0.72173	1.7333e-06		0.72173	1.81012e-06		0.72173	1.89845e-06		0.72173	1.93057e-06
0.724624	2.09139e-06		0.724624	2.23363e-06		0.724624	1.7306e-06		0.724624	1.80679e-06		0.724624	1.89451e-06		0.724624	1.92612e-06
0.727518	2.08239e-06		0.727518	2.22374e-06		0.727518	1.7279e-06		0.727518	1.80344e-06		0.727518	1.89055e-06		0.727518	1.92164e-06
0.730412	2.07364e-06		0.730412	2.21403e-06		0.730412	1.7252e-06		0.730412	1.80006e-06		0.730412	1.88656e-06		0.730412	1.91711e-06
0.733305	2.0651e-06		0.733305	2.20448e-06		0.733305	1.72248e-06		0.733305	1.79666e-06		0.733305	1.88254e-06		0.733305	1.91253e-06
0.736199	2.05673e-06		0.736199	2.19505e-06		0.736199	1.71975e-06		0.736199	1.79323e-06		0.736199	1.87848e-06		0.736199	1.90789e-06
0.739093	2.04849e-06		0.739093	2.18572e-06		0.739093	1.717e-06		0.739093	1.78976e-06		0.739093	1.87438e-06		0.739093	1.90317e-06
0.741987	2.04034e-06		0.741987	2.17646e-06		0.741987	1.71423e-06		0.741987	1.78625e-06		0.741987	1.87023e-06		0.741987	1.89837e-06
0.744881	2.03225e-06		0.744881	2.1673e-06		0.744881	1.71144e-06		0.744881	1.78268e-06		0.744881	1.86602e-06		0.744881	1.89347e-06
0.747775	2.02422e-06		0.747775	2.15823e-06		0.747775	1.70861e-06		0.747775	1.77906e-06		0.747775	1.86176e-06		0.747775	1.88846e-06
0.750669	2.01629e-06		0.750669	2.14922e-06		0.750669	1.70574e-06		0.750669	1.77536e-06		0.750669	1.85741e-06		0.750669	1.88333e-06
0.753563	2.00844e-06		0.753563	2.14026e-06		0.753563	1.70282e-06		0.753563	1.77158e-06		0.753563	1.85294e-06		0.753563	1.87805e-06
0.756457	2.00064e-06		0.756457	2.1313e-06		0.756457	1.69984e-06		0.756457	1.76771e-06		0.756457	1.84832e-06		0.756457	1.87262e-06
0.75935	1.99284e-06		0.75935	2.12231e-06		0.75935	1.6968e-06		0.75935	1.76373e-06		0.75935	1.84354e-06		0.75935	1.86701e-06
0.762244	1.98501e-06		0.762244	2.11326e-06		0.762244	1.69367e-06		0.762244	1.75963e-06		0.762244	1.83859e-06		0.762244	1.8612e-06
0.765138	1.97712e-06		0.765138	2.10412e-06		0.765138	1.69046e-06		0.765138	1.75538e-06		0.765138	1.83344e-06		0.765138	1.85517e-06
0.768032	1.96913e-06		0.768032	2.09488e-06		0.768032	1.68714e-06		0.768032	1.75098e-06		0.768032	1.82808e-06		0.768032	1.84891e-06
0.770926	1.96105e-06		0.770926	2.08554e-06		0.770926	1.6837e-06		0.770926	1.7464e-06		0.770926	1.82249e-06		0.770926	1.8424e-06
0.77382	1.9529e-06		0.77382	2.07607e-06		0.77382	1.68013e-06		0.77382	1.74163e-06		0.77382	1.81666e-06		0.77382	1.83561e-06
0.776714	1.94465e-06		0.776714	2.06644e-06		0.776714	1.67642e-06		0.776714	1.73667e-06		0.776714	1.81057e-06		0.776714	1.82853e-06
0.779608	1.93629e-06		0.779608	2.05662e-06		0.779608	1.67253e-06		0.779608	1.73149e-06		0.779608	1.80422e-06		0.779608	1.82115e-06
0.782502	1.9278e-06		0.782502	2.0466e-06		0.782502	1.66846e-06		0.782502	1.72611e-06		0.782502	1.79759e-06		0.782502	1.81344e-06
0.785396	1.91917e-06		0.785396	2.03635e-06		0.785396	1.66419e-06		0.785396	1.72051e-06		0.785396	1.79068e-06		0.785396	1.80539e-06
0.788289	1.9104e-06		0.788289	2.0259e-06		0.788289	1.65972e-06		0.788289	1.71471e-06		0.788289	1.78349e-06		0.788289	1.79701e-06
0.791183	1.90148e-06		0.791183	2.01531e-06		0.791183	1.65505e-06		0.791183	1.7087e-06		0.791183	1.77602e-06		0.791183	1.78831e-06
0.794077	1.89246e-06		0.794077	2.00463e-06		0.794077	1.65018e-06		0.794077	1.70249e-06		0.794077	1.76825e-06		0.794077	1.77928e-06
0.796971	1.88341e-06		0.796971	1.99389e-06		0.796971	1.64511e-06		0.796971	1.69609e-06		0.796971	1.76015e-06		0.796971	1.76994e-06
0.799865	1.87434e-06		0.799865	1.98309e-06		0.799865	1.63984e-06		0.799865	1.6895e-06		0.799865	1.75173e-06		0.799865	1.76029e-06
0.799865	1.87434e-06		0.799865	1.98309e-06		0.799865	1.63984e-06		0.799865	1.6895e-06		0.799865	1.75173e-06		0.799865	1.76029e-06
0.802759	1.86521e-06		0.802759	1.97221e-06		0.802759	1.63433e-06		0.802759	1.68269e-06		0.802759	1.74299e-06		0.802759	1.75028e-06
0.805653	1.85596e-06		0.805653	1.9612e-06		0.805653	1.62856e-06		0.805653	1.67562e-06		0.805653	1.73392e-06		0.805653	1.73987e-06
0.808547	1.84663e-06		0.808547	1.95008e-06		0.808547	1.62252e-06		0.808547	1.66825e-06		0.808547	1.72453e-06		0.808547	1.72911e-06
0.811441	1.83725e-06		0.811441	1.93889e-06		0.811441	1.61619e-06		0.811441	1.66056e-06		0.811441	1.71481e-06		0.811441	1.718e-06
0.814334	1.82782e-06		0.814334	1.92763e-06		0.814334	1.60957e-06		0.814334	1.65253e-06		0.814334	1.70477e-06		0.814334	1.70656e-06
0.817228	1.81837e-06		0.817228	1.91628e-06		0.817228	1.60265e-06		0.817228	1.64416e-06		0.817228	1.6944e-06		0.817228	1.69479e-06
0.820122	1.80891e-06		0.820122	1.90484e-06		0.820122	1.59543e-06		0.820122	1.63545e-06		0.820122	1.68371e-06		0.820122	1.68272e-06
0.823016	1.79945e-06		0.823016	1.89328e-06		0.823016	1.58786e-06		0.823016	1.62639e-06		0.823016	1.67267e-06		0.823016	1.67034e-06
0.82591	1.78997e-06		0.82591	1.88163e-06		0.82591	1.5799e-06		0.82591	1.61698e-06		0.82591	1.66131e-06		0.82591	1.65769e-06
0.828804	1.78046e-06		0.828804	1.86988e-06		0.828804	1.57154e-06		0.828804	1.60723e-06		0.828804	1.64963e-06		0.828804	1.64479e-06
0.831698	1.7709e-06		0.831698	1.85805e-06		0.831698	1.56279e-06		0.831698	1.59714e-06		0.831698	1.63765e-06		0.831698	1.63167e-06
0.834592	1.76129e-06		0.834592	1.84613e-06		0.834592	1.55367e-06		0.834592	1.58673e-06		0.834592	1.62538e-06		0.834592	1.61835e-06
0.837486	1.75165e-06		0.837486	1.83413e-06		0.837486	1.54419e-06		0.837486	1.57598e-06		0.837486	1.61286e-06		0.837486	1.60488e-06
0.840379	1.74201e-06		0.840379	1.82204e-06		0.840379	1.53437e-06		0.840379	1.56493e-06		0.840379	1.60012e-06		0.840379	1.59129e-06
0.843273	1.73239e-06		0.843273	1.80984e-06		0.843273	1.52426e-06		0.843273	1.55362e-06		0.843273	1.58722e-06		0.843273	1.57766e-06
0.846167	1.72282e-06		0.846167	1.79764e-06		0.846167	1.5139e-06		0.846167	1.54209e-06		0.846167	1.57421e-06		0.846167	1.56406e-06
0.849061	1.71333e-06		0.849061	1.78551e-06		0.849061	1.5033e-06		0.849061	1.5304e-06		0.849061	1.56113e-06		0.849061	1.55056e-06
0.851955	1.70393e-06		0.851955	1.77351e-06		0.851955	1.4925e-06		0.851955	1.5186e-06		0.851955	1.54805e-06		0.851955	1.53723e-06
0.854849	1.69468e-06		0.854849	1.76169e-06		0.854849	1.48157e-06		0.854849	1.50679e-06		0.854849	1.53508e-06		0.854849	1.52415e-06
0.857743	1.68564e-06		0.857743	1.75011e-06		0.857743	1.47061e-06		0.857743	1.49506e-06		0.857743	1.52236e-06		0.857743	1.51146e-06
0.860637	1.67692e-06		0.860637	1.73886e-06		0.860637	1.45975e-06		0.860637	1.48354e-06		0.860637	1.50998e-06		0.860637	1.49934e-06
0.863531	1.66869e-06		0.863531	1.72811e-06		0.863531	1.44916e-06		0.863531	1.47237e-06		0.863531	1.49811e-06		0.863531	1.48797e-06
0.866424	1.66107e-06		0.866424	1.71812e-06		0.866424	1.43904e-06		0.866424	1.46176e-06		0.866424	1.48692e-06		0.866424	1.47756e-06
0.869318	1.6543e-06		0.869318	1.70911e-06		0.869318	1.4297e-06		0.869318	1.452e-06		0.869318	1.47671e-06		0.869318	1.46845e-06
0.872212	1.64861e-06		0.872212	1.70149e-06		0.872212	1.42162e-06		0.872212	1.44359e-06		0.872212	1.46797e-06		0.872212	1.46085e-06
0.875106	1.64443e-06		0.875106	1.69588e-06		0.875106	1.41553e-06		0.875106	1.43731e-06		0.875106	1.46151e-06		0.875106	1.4552e-06
0.878	1.64281e-06		0.878	1.69369e-06		0.878	1.4131e-06		0.878	1.43482e-06		0.878	1.45896e-06		0.878	1.45297e-06

## Sheet: no distribution 
SN 0			SN 0.2			SN 0.4			SN 0.6			SN 0.8			SN 1
Axial distance	no mass fraction		Axial distance	no mass fraction		Axial distance	no mass fraction		Axial distance	no mass fraction		Axial distance	no mass fraction		Axial distance	no mass fraction
0.00115113	2.95228e-06		0.00115113	2.9474e-06		0.00115113	1.95823e-06		0.00115113	3.0517e-07		0.00115113	2.2164e-07		0.00115113	1.48928e-07
0.00404502	4.16302e-06		0.00404502	4.13617e-06		0.00404502	2.31761e-06		0.00404502	4.49676e-07		0.00404502	2.48111e-07		0.00404502	1.66561e-07
0.00693891	5.58666e-06		0.00693891	5.51465e-06		0.00693891	2.58913e-06		0.00693891	5.76791e-07		0.00693891	2.71445e-07		0.00693891	1.78362e-07
0.0098328	7.20659e-06		0.0098328	7.04116e-06		0.0098328	2.76593e-06		0.0098328	6.71269e-07		0.0098328	2.92038e-07		0.0098328	1.8145e-07
0.0127267	8.98316e-06		0.0127267	8.64164e-06		0.0127267	2.87041e-06		0.0127267	7.49585e-07		0.0127267	3.06055e-07		0.0127267	1.76099e-07
0.0156206	1.08453e-05		0.0156206	1.0217e-05		0.0156206	2.94717e-06		0.0156206	8.05065e-07		0.0156206	3.10507e-07		0.0156206	1.64701e-07
0.0185145	1.26934e-05		0.0185145	1.16551e-05		0.0185145	3.03655e-06		0.0185145	8.30597e-07		0.0185145	3.05165e-07		0.0185145	1.49528e-07
0.0214084	1.44161e-05		0.0214084	1.28535e-05		0.0214084	3.15436e-06		0.0214084	8.25835e-07		0.0214084	2.93229e-07		0.0214084	1.3317e-07
0.0243023	1.59148e-05		0.0243023	1.37482e-05		0.0243023	3.29273e-06		0.0243023	7.98442e-07		0.0243023	2.76291e-07		0.0243023	1.17824e-07
0.0271961	1.71239e-05		0.0271961	1.43136e-05		0.0271961	3.43352e-06		0.0271961	7.57552e-07		0.0271961	2.54662e-07		0.0271961	1.07417e-07
0.03009	1.80106e-05		0.03009	1.45661e-05		0.03009	3.55872e-06		0.03009	7.11916e-07		0.03009	2.32526e-07		0.03009	1.04587e-07
0.0329839	1.857e-05		0.0329839	1.45501e-05		0.0329839	3.65613e-06		0.0329839	6.64395e-07		0.0329839	2.16495e-07		0.0329839	1.0912e-07
0.0358778	1.88209e-05		0.0358778	1.43195e-05		0.0358778	3.72128e-06		0.0358778	6.1529e-07		0.0358778	2.12711e-07		0.0358778	1.2153e-07
0.0387717	1.88078e-05		0.0387717	1.39296e-05		0.0387717	3.75368e-06		0.0387717	5.74738e-07		0.0387717	2.25157e-07		0.0387717	1.4393e-07
0.0416656	1.85793e-05		0.0416656	1.34349e-05		0.0416656	3.76278e-06		0.0416656	5.6075e-07		0.0416656	2.65946e-07		0.0416656	1.78509e-07
0.0445595	1.81744e-05		0.0445595	1.28899e-05		0.0445595	3.74608e-06		0.0445595	6.02203e-07		0.0445595	3.66613e-07		0.0445595	2.28066e-07
0.0474534	1.76384e-05		0.0474534	1.2344e-05		0.0474534	3.69557e-06		0.0474534	8.04419e-07		0.0474534	5.99576e-07		0.0474534	2.98126e-07
0.0503473	1.70161e-05		0.0503473	1.18451e-05		0.0503473	3.62003e-06		0.0503473	1.46954e-06		0.0503473	1.13325e-06		0.0503473	4.047e-07
0.0532412	1.63477e-05		0.0532412	1.14338e-05		0.0532412	3.52672e-06		0.0532412	3.22825e-06		0.0532412	2.37271e-06		0.0532412	5.92669e-07
0.056135	1.56697e-05		0.056135	1.1139e-05		0.056135	3.41876e-06		0.056135	7.55694e-06		0.056135	5.17087e-06		0.056135	9.79784e-07
0.0590289	1.50152e-05		0.0590289	1.09769e-05		0.0590289	3.29876e-06		0.0590289	1.6668e-05		0.0590289	1.08983e-05		0.0590289	1.85284e-06
0.0619228	1.44136e-05		0.0619228	1.09458e-05		0.0619228	3.17014e-06		0.0619228	3.451e-05		0.0619228	2.23142e-05		0.0619228	3.76315e-06
0.0648167	1.38905e-05		0.0648167	1.10312e-05		0.0648167	3.03997e-06		0.0648167	6.88673e-05		0.0648167	4.45567e-05		0.0648167	7.70939e-06
0.0677106	1.34675e-05		0.0677106	1.12174e-05		0.0677106	2.90686e-06		0.0677106	0.000129898		0.0677106	8.50313e-05		0.0677106	1.54801e-05
0.0706045	1.31591e-05		0.0706045	1.14882e-05		0.0706045	2.77512e-06		0.0706045	0.00022352		0.0706045	0.000150976		0.0706045	3.02695e-05
0.0734984	1.29728e-05		0.0734984	1.18229e-05		0.0734984	2.67844e-06		0.0734984	0.000342236		0.0734984	0.000242923		0.0734984	5.70091e-05
0.0763923	1.29083e-05		0.0763923	1.21987e-05		0.0763923	2.69949e-06		0.0763923	0.000463589		0.0763923	0.000349801		0.0763923	0.00010161
0.0792862	1.29584e-05		0.0792862	1.25937e-05		0.0792862	3.08653e-06		0.0792862	0.000541383		0.0792862	0.00045091		0.0792862	0.000168242
0.0821801	1.31189e-05		0.0821801	1.29875e-05		0.0821801	4.50129e-06		0.0821801	0.000533969		0.0821801	0.000477145		0.0821801	0.000254782
0.085074	1.33789e-05		0.085074	1.33621e-05		0.085074	8.32117e-06		0.085074	0.000470187		0.085074	0.000423967		0.085074	0.000350906
0.085074	1.33789e-05		0.085074	1.33621e-05		0.085074	8.32117e-06		0.085074	0.000470187		0.085074	0.000423967		0.085074	0.000350906
0.0879678	1.37264e-05		0.0879678	1.37037e-05		0.0879678	1.70511e-05		0.0879678	0.000399981		0.0879678	0.00036016		0.0879678	0.000438798
0.0908617	1.41551e-05		0.0908617	1.40037e-05		0.0908617	3.46509e-05		0.0908617	0.000338176		0.0908617	0.000305118		0.0908617	0.000463039
0.0937556	1.46518e-05		0.0937556	1.42619e-05		0.0937556	6.63681e-05		0.0937556	0.000287149		0.0937556	0.000261241		0.0937556	0.000418847
0.0966495	1.52012e-05		0.0966495	1.44724e-05		0.0966495	0.000117681		0.0966495	0.000245376		0.0966495	0.00022687		0.0966495	0.0003629
0.0995434	1.57891e-05		0.0995434	1.46333e-05		0.0995434	0.000192262		0.0995434	0.000211316		0.0995434	0.000200026		0.0995434	0.000315434
0.102437	1.63982e-05		0.102437	1.4755e-05		0.102437	0.000289741		0.102437	0.00018332		0.102437	0.00017894		0.102437	0.000278585
0.105331	1.70113e-05		0.105331	1.48449e-05		0.105331	0.000404944		0.105331	0.000160403		0.105331	0.000162311		0.105331	0.00024982
0.108225	1.76131e-05		0.108225	1.49113e-05		0.108225	0.000529145		0.108225	0.000141692		0.108225	0.000149191		0.108225	0.000227295
0.111119	1.81891e-05		0.111119	1.49642e-05		0.111119	0.000648233		0.111119	0.000126384		0.111119	0.000138824		0.111119	0.000209681
0.114013	1.8737e-05		0.114013	1.50142e-05		0.114013	0.000707933		0.114013	0.000113903		0.114013	0.00013064		0.114013	0.000195879
0.116907	1.92404e-05		0.116907	1.50714e-05		0.116907	0.000679554		0.116907	0.000103774		0.116907	0.000124192		0.116907	0.000185142
0.119801	1.96912e-05		0.119801	1.51453e-05		0.119801	0.000604286		0.119801	9.56081e-05		0.119801	0.000119119		0.119801	0.000176813
0.122695	2.0087e-05		0.122695	1.52442e-05		0.122695	0.000518021		0.122695	8.90124e-05		0.122695	0.000115144		0.122695	0.000170364
0.125588	2.04204e-05		0.125588	1.53759e-05		0.125588	0.000436319		0.125588	8.36719e-05		0.125588	0.000112041		0.125588	0.000165392
0.128482	2.07029e-05		0.128482	1.55488e-05		0.128482	0.00036547		0.128482	7.93834e-05		0.128482	0.000109626		0.128482	0.000161564
0.131376	2.09321e-05		0.131376	1.57623e-05		0.131376	0.000306278		0.131376	7.5952e-05		0.131376	0.000107749		0.131376	0.000158615
0.13427	2.11067e-05		0.13427	1.60224e-05		0.13427	0.000257202		0.13427	7.32091e-05		0.13427	0.000106288		0.13427	0.000156333
0.137164	2.12345e-05		0.137164	1.63345e-05		0.137164	0.000216989		0.137164	7.10263e-05		0.137164	0.000105143		0.137164	0.000154556
0.140058	2.13306e-05		0.140058	1.66893e-05		0.140058	0.000184128		0.140058	6.92944e-05		0.140058	0.000104238		0.140058	0.000153156
0.142952	2.13975e-05		0.142952	1.70819e-05		0.142952	0.000157328		0.142952	6.79216e-05		0.142952	0.000103513		0.142952	0.000152035
0.145846	2.14277e-05		0.145846	1.75088e-05		0.145846	0.000135472		0.145846	6.6831e-05		0.145846	0.000102919		0.145846	0.000151117
0.14874	2.14278e-05		0.14874	1.79648e-05		0.14874	0.00011764		0.14874	6.59591e-05		0.14874	0.000102423		0.14874	0.000150346
0.151633	2.14048e-05		0.151633	1.84461e-05		0.151633	0.00010313		0.151633	6.52543e-05		0.151633	0.000101998		0.151633	0.000149679
0.154527	2.13657e-05		0.154527	1.89541e-05		0.154527	9.13448e-05		0.154527	6.46746e-05		0.154527	0.000101623		0.154527	0.000149087
0.157421	2.13159e-05		0.157421	1.94767e-05		0.157421	8.17601e-05		0.157421	6.41868e-05		0.157421	0.000101284		0.157421	0.000148545
0.160315	2.12606e-05		0.160315	2.00036e-05		0.160315	7.3914e-05		0.160315	6.3765e-05		0.160315	0.000100971		0.160315	0.000148038
0.163209	2.12062e-05		0.163209	2.05368e-05		0.163209	6.74595e-05		0.163209	6.33888e-05		0.163209	0.000100675		0.163209	0.000147553
0.166103	2.11635e-05		0.166103	2.10794e-05		0.166103	6.217e-05		0.166103	6.30443e-05		0.166103	0.000100391		0.166103	0.000147081
0.166103	2.11635e-05		0.166103	2.10794e-05		0.166103	6.217e-05		0.166103	6.30443e-05		0.166103	0.000100391		0.166103	0.000147081
0.168997	2.11421e-05		0.168997	2.1636e-05		0.168997	5.78163e-05		0.168997	6.27357e-05		0.168997	0.000100116		0.168997	0.00014661
0.171891	2.11429e-05		0.171891	2.22102e-05		0.171891	5.42308e-05		0.171891	6.24651e-05		0.171891	9.9848e-05		0.171891	0.00014613
0.174785	2.11663e-05		0.174785	2.27907e-05		0.174785	5.13269e-05		0.174785	6.22243e-05		0.174785	9.95839e-05		0.174785	0.00014564
0.177678	2.12127e-05		0.177678	2.3362e-05		0.177678	4.90224e-05		0.177678	6.20106e-05		0.177678	9.93206e-05		0.177678	0.000145139
0.180572	2.1284e-05		0.180572	2.39266e-05		0.180572	4.71905e-05		0.180572	6.18192e-05		0.180572	9.90545e-05		0.180572	0.000144627
0.183466	2.13799e-05		0.183466	2.4485e-05		0.183466	4.57247e-05		0.183466	6.1645e-05		0.183466	9.87875e-05		0.183466	0.000144102
0.18636	2.15013e-05		0.18636	2.50325e-05		0.18636	4.4561e-05		0.18636	6.14843e-05		0.18636	9.85216e-05		0.18636	0.000143566
0.189254	2.16511e-05		0.189254	2.55632e-05		0.189254	4.36439e-05		0.189254	6.13341e-05		0.189254	9.82543e-05		0.189254	0.000143017
0.192148	2.18257e-05		0.192148	2.6075e-05		0.192148	4.29257e-05		0.192148	6.11923e-05		0.192148	9.79847e-05		0.192148	0.000142456
0.195042	2.2022e-05		0.195042	2.65686e-05		0.195042	4.2366e-05		0.195042	6.10572e-05		0.195042	9.77123e-05		0.195042	0.000141886
0.197936	2.2243e-05		0.197936	2.70472e-05		0.197936	4.19313e-05		0.197936	6.09276e-05		0.197936	9.74366e-05		0.197936	0.000141306
0.20083	2.24914e-05		0.20083	2.75086e-05		0.20083	4.15939e-05		0.20083	6.08026e-05		0.20083	9.71578e-05		0.20083	0.000140717
0.203723	2.27687e-05		0.203723	2.79519e-05		0.203723	4.13312e-05		0.203723	6.06814e-05		0.203723	9.6876e-05		0.203723	0.00014012
0.206617	2.30762e-05		0.206617	2.83864e-05		0.206617	4.11254e-05		0.206617	6.05638e-05		0.206617	9.65918e-05		0.206617	0.000139513
0.209511	2.34148e-05		0.209511	2.88223e-05		0.209511	4.0963e-05		0.209511	6.04497e-05		0.209511	9.63064e-05		0.209511	0.000138899
0.212405	2.37858e-05		0.212405	2.92694e-05		0.212405	4.08345e-05		0.212405	6.03393e-05		0.212405	9.60216e-05		0.212405	0.000138275
0.215299	2.4189e-05		0.215299	2.97363e-05		0.215299	4.07324e-05		0.215299	6.02338e-05		0.215299	9.57416e-05		0.215299	0.000137642
0.215299	2.4189e-05		0.215299	2.97363e-05		0.215299	4.07324e-05		0.215299	6.02338e-05		0.215299	9.57416e-05		0.215299	0.000137642
0.218193	2.46288e-05		0.218193	3.02363e-05		0.218193	4.06466e-05		0.218193	6.01281e-05		0.218193	9.54607e-05		0.218193	0.000137002
0.221087	2.51089e-05		0.221087	3.07837e-05		0.221087	4.05671e-05		0.221087	6.00149e-05		0.221087	9.51696e-05		0.221087	0.000136356
0.223981	2.56285e-05		0.223981	3.13871e-05		0.223981	4.04883e-05		0.223981	5.98915e-05		0.223981	9.48667e-05		0.223981	0.000135706
0.226875	2.61811e-05		0.226875	3.20532e-05		0.226875	4.04074e-05		0.226875	5.97572e-05		0.226875	9.45518e-05		0.226875	0.000135051
0.229768	2.67649e-05		0.229768	3.27815e-05		0.229768	4.03235e-05		0.229768	5.96131e-05		0.229768	9.4226e-05		0.229768	0.000134391
0.232662	2.73863e-05		0.232662	3.35776e-05		0.232662	4.02364e-05		0.232662	5.94604e-05		0.232662	9.38906e-05		0.232662	0.000133727
0.235556	2.80465e-05		0.235556	3.44564e-05		0.235556	4.01462e-05		0.235556	5.93004e-05		0.235556	9.35466e-05		0.235556	0.000133057
0.23845	2.87405e-05		0.23845	3.54242e-05		0.23845	4.00531e-05		0.23845	5.91342e-05		0.23845	9.31945e-05		0.23845	0.000132381
0.241344	2.94619e-05		0.241344	3.6482e-05		0.241344	3.99576e-05		0.241344	5.89625e-05		0.241344	9.28346e-05		0.241344	0.000131698
0.244238	3.02116e-05		0.244238	3.76323e-05		0.244238	3.98598e-05		0.244238	5.87862e-05		0.244238	9.24671e-05		0.244238	0.000131007
0.247132	3.09907e-05		0.247132	3.88769e-05		0.247132	3.97602e-05		0.247132	5.86055e-05		0.247132	9.20918e-05		0.247132	0.000130307
0.250026	3.17996e-05		0.250026	4.02222e-05		0.250026	3.96589e-05		0.250026	5.84208e-05		0.250026	9.17083e-05		0.250026	0.000129606
0.25292	3.26383e-05		0.25292	4.16817e-05		0.25292	3.95561e-05		0.25292	5.82321e-05		0.25292	9.13164e-05		0.25292	0.000128913
0.255814	3.35057e-05		0.255814	4.32701e-05		0.255814	3.94522e-05		0.255814	5.80391e-05		0.255814	9.09214e-05		0.255814	0.000128225
0.258707	3.44039e-05		0.258707	4.50009e-05		0.258707	3.93472e-05		0.258707	5.78416e-05		0.258707	9.05282e-05		0.258707	0.000127544
0.261601	3.53364e-05		0.261601	4.68865e-05		0.261601	3.92414e-05		0.261601	5.76386e-05		0.261601	9.01364e-05		0.261601	0.000126868
0.264495	3.63058e-05		0.264495	4.89479e-05		0.264495	3.9135e-05		0.264495	5.74292e-05		0.264495	8.9746e-05		0.264495	0.000126198
0.267389	3.73128e-05		0.267389	5.12006e-05		0.267389	3.9028e-05		0.267389	5.72212e-05		0.267389	8.9357e-05		0.267389	0.000125534
0.270283	3.83585e-05		0.270283	5.36453e-05		0.270283	3.89206e-05		0.270283	5.70227e-05		0.270283	8.89695e-05		0.270283	0.000124877
0.273177	3.94504e-05		0.273177	5.62801e-05		0.273177	3.88129e-05		0.273177	5.68333e-05		0.273177	8.85836e-05		0.273177	0.000124225
0.276071	4.05983e-05		0.276071	5.90978e-05		0.276071	3.87051e-05		0.276071	5.66527e-05		0.276071	8.81992e-05		0.276071	0.000123581
0.278965	4.18121e-05		0.278965	6.20933e-05		0.278965	3.85971e-05		0.278965	5.64803e-05		0.278965	8.78165e-05		0.278965	0.000122943
0.281859	4.3106e-05		0.281859	6.5279e-05		0.281859	3.84892e-05		0.281859	5.63158e-05		0.281859	8.74354e-05		0.281859	0.000122314
0.284752	4.44958e-05		0.284752	6.86625e-05		0.284752	3.83814e-05		0.284752	5.61589e-05		0.284752	8.70561e-05		0.284752	0.000121694
0.287646	4.59916e-05		0.287646	7.2243e-05		0.287646	3.82738e-05		0.287646	5.60093e-05		0.287646	8.66784e-05		0.287646	0.000121084
0.29054	4.76033e-05		0.29054	7.60261e-05		0.29054	3.81664e-05		0.29054	5.58668e-05		0.29054	8.63024e-05		0.29054	0.000120487
0.293434	4.93464e-05		0.293434	8.00179e-05		0.293434	3.80592e-05		0.293434	5.57312e-05		0.293434	8.59279e-05		0.293434	0.000119906
0.296328	5.12375e-05		0.296328	8.42354e-05		0.296328	3.79524e-05		0.296328	5.56022e-05		0.296328	8.55548e-05		0.296328	0.000119315
0.299222	5.3294e-05		0.299222	8.86825e-05		0.299222	3.7846e-05		0.299222	5.54797e-05		0.299222	8.5183e-05		0.299222	0.000118693
0.302116	5.55333e-05		0.302116	9.33609e-05		0.302116	3.774e-05		0.302116	5.53634e-05		0.302116	8.48124e-05		0.302116	0.000118041
0.30501	5.79729e-05		0.30501	9.82733e-05		0.30501	3.76345e-05		0.30501	5.52533e-05		0.30501	8.44427e-05		0.30501	0.000117359
0.307904	6.06303e-05		0.307904	0.000103413		0.307904	3.75293e-05		0.307904	5.5149e-05		0.307904	8.40741e-05		0.307904	0.000116648
0.310797	6.35226e-05		0.310797	0.000108786		0.310797	3.74246e-05		0.310797	5.50505e-05		0.310797	8.37064e-05		0.310797	0.000115907
0.313691	6.66705e-05		0.313691	0.000114412		0.313691	3.732e-05		0.313691	5.4957e-05		0.313691	8.33309e-05		0.313691	0.000115137
0.313691	6.66705e-05		0.313691	0.000114412		0.313691	3.732e-05		0.313691	5.4957e-05		0.313691	8.33309e-05		0.313691	0.000115137
0.316585	7.00896e-05		0.316585	0.000120317		0.316585	3.72108e-05		0.316585	5.48502e-05		0.316585	8.2945e-05		0.316585	0.000114357
0.319479	7.37965e-05		0.319479	0.000126519		0.319479	3.70932e-05		0.319479	5.47163e-05		0.319479	8.25541e-05		0.319479	0.000113585
0.322373	7.78116e-05		0.322373	0.000133041		0.322373	3.69693e-05		0.322373	5.45615e-05		0.322373	8.21581e-05		0.322373	0.000112817
0.325267	8.21468e-05		0.325267	0.00013991		0.325267	3.68408e-05		0.325267	5.43891e-05		0.325267	8.17571e-05		0.325267	0.000112051
0.328161	8.68157e-05		0.328161	0.000147183		0.328161	3.67089e-05		0.328161	5.4202e-05		0.328161	8.13518e-05		0.328161	0.000111285
0.331055	9.18363e-05		0.331055	0.000154916		0.331055	3.65746e-05		0.331055	5.40024e-05		0.331055	8.09428e-05		0.331055	0.000110516
0.333949	9.72271e-05		0.333949	0.000163159		0.333949	3.64389e-05		0.333949	5.37923e-05		0.333949	8.05305e-05		0.333949	0.000109744
0.336842	0.000103006		0.336842	0.000171952		0.336842	3.63023e-05		0.336842	5.35729e-05		0.336842	8.01153e-05		0.336842	0.000108976
0.339736	0.000109195		0.339736	0.00018132		0.339736	3.61655e-05		0.339736	5.33475e-05		0.339736	7.96977e-05		0.339736	0.000108224
0.34263	0.000115813		0.34263	0.000191294		0.34263	3.60289e-05		0.34263	5.31194e-05		0.34263	7.92779e-05		0.34263	0.000107492
0.345524	0.000122886		0.345524	0.000201905		0.345524	3.58929e-05		0.345524	5.28895e-05		0.345524	7.88559e-05		0.345524	0.000106778
0.348418	0.000130443		0.348418	0.000213185		0.348418	3.57577e-05		0.348418	5.26588e-05		0.348418	7.8432e-05		0.348418	0.000106086
0.351312	0.000138518		0.351312	0.000225207		0.351312	3.56236e-05		0.351312	5.24279e-05		0.351312	7.80059e-05		0.351312	0.000105416
0.354206	0.000147149		0.354206	0.00023804		0.354206	3.5491e-05		0.354206	5.21973e-05		0.354206	7.75776e-05		0.354206	0.000104769
0.3571	0.000156384		0.3571	0.000251707		0.3571	3.53599e-05		0.3571	5.19673e-05		0.3571	7.71469e-05		0.3571	0.000104147
0.359994	0.000166286		0.359994	0.000266256		0.359994	3.52306e-05		0.359994	5.17384e-05		0.359994	7.67134e-05		0.359994	0.000103553
0.362887	0.000176936		0.362887	0.000281764		0.362887	3.51032e-05		0.362887	5.15108e-05		0.362887	7.62769e-05		0.362887	0.000102989
0.365781	0.000188406		0.365781	0.000298344		0.365781	3.49778e-05		0.365781	5.12848e-05		0.365781	7.58427e-05		0.365781	0.000102457
0.368675	0.000200763		0.368675	0.000316166		0.368675	3.48545e-05		0.368675	5.10606e-05		0.368675	7.54163e-05		0.368675	0.000101961
0.371569	0.000214074		0.371569	0.000335403		0.371569	3.47333e-05		0.371569	5.08383e-05		0.371569	7.49977e-05		0.371569	0.000101505
0.374463	0.000228396		0.374463	0.000356232		0.374463	3.46143e-05		0.374463	5.06181e-05		0.374463	7.4587e-05		0.374463	0.00010109
0.377357	0.00024377		0.377357	0.000378865		0.377357	3.44973e-05		0.377357	5.03999e-05		0.377357	7.41847e-05		0.377357	0.000100688
0.380251	0.000260241		0.380251	0.000403518		0.380251	3.43823e-05		0.380251	5.0184e-05		0.380251	7.3791e-05		0.380251	0.000100272
0.383145	0.000277841		0.383145	0.00043049		0.383145	3.42692e-05		0.383145	4.99701e-05		0.383145	7.34064e-05		0.383145	9.98433e-05
0.386039	0.000296623		0.386039	0.000460184		0.386039	3.41576e-05		0.386039	4.97581e-05		0.386039	7.30311e-05		0.386039	9.94029e-05
0.388932	0.000316699		0.388932	0.000493053		0.388932	3.40472e-05		0.388932	4.95478e-05		0.388932	7.26655e-05		0.388932	9.89509e-05
0.391826	0.000338282		0.391826	0.00053002		0.391826	3.39376e-05		0.391826	4.9339e-05		0.391826	7.231e-05		0.391826	9.84866e-05
0.39472	0.000361599		0.39472	0.000571801		0.39472	3.38284e-05		0.39472	4.9131e-05		0.39472	7.19651e-05		0.39472	9.80091e-05
0.397614	0.000386836		0.397614	0.000619931		0.397614	3.3719e-05		0.397614	4.89234e-05		0.397614	7.16314e-05		0.397614	9.75173e-05
0.400508	0.000414122		0.400508	0.000677734		0.400508	3.3608e-05		0.400508	4.87162e-05		0.400508	7.13097e-05		0.400508	9.70093e-05
0.403402	0.000443459		0.403402	0.000748741		0.403402	3.3494e-05		0.403402	4.85055e-05		0.403402	7.10011e-05		0.403402	9.64832e-05
0.403402	0.000443459		0.403402	0.000748741		0.403402	3.3494e-05		0.403402	4.85055e-05		0.403402	7.10011e-05		0.403402	9.64832e-05
0.406296	0.000474937		0.406296	0.000836339		0.406296	3.33781e-05		0.406296	4.82909e-05		0.406296	7.06952e-05		0.406296	9.59427e-05
0.40919	0.000508778		0.40919	0.000940877		0.40919	3.32619e-05		0.40919	4.8075e-05		0.40919	7.03813e-05		0.40919	9.53908e-05
0.412084	0.000545654		0.412084	0.00105576		0.412084	3.31447e-05		0.412084	4.78566e-05		0.412084	7.00611e-05		0.412084	9.48288e-05
0.414977	0.000586575		0.414977	0.00117232		0.414977	3.30264e-05		0.414977	4.76353e-05		0.414977	6.97357e-05		0.414977	9.42609e-05
0.417871	0.000632376		0.417871	0.00128272		0.417871	3.29068e-05		0.417871	4.74111e-05		0.417871	6.94051e-05		0.417871	9.36888e-05
0.420765	0.0006846		0.420765	0.00138231		0.420765	3.27859e-05		0.420765	4.71839e-05		0.420765	6.90692e-05		0.420765	9.31124e-05
0.423659	0.000746266		0.423659	0.0014692		0.423659	3.26636e-05		0.423659	4.6954e-05		0.423659	6.87281e-05		0.423659	9.25313e-05
0.426553	0.000821956		0.426553	0.00154229		0.426553	3.25401e-05		0.426553	4.67214e-05		0.426553	6.83821e-05		0.426553	9.19455e-05
0.429447	0.000913686		0.429447	0.00160153		0.429447	3.24155e-05		0.429447	4.64864e-05		0.429447	6.80318e-05		0.429447	9.13547e-05
0.432341	0.00101553		0.432341	0.00164668		0.432341	3.22901e-05		0.432341	4.62492e-05		0.432341	6.76774e-05		0.432341	9.07591e-05
0.435235	0.00111942		0.435235	0.00167927		0.435235	3.2164e-05		0.435235	4.60098e-05		0.435235	6.73197e-05		0.435235	9.01587e-05
0.438129	0.00121635		0.438129	0.00170091		0.438129	3.20374e-05		0.438129	4.57686e-05		0.438129	6.69591e-05		0.438129	8.95537e-05
0.441023	0.00130046		0.441023	0.00170883		0.441023	3.19106e-05		0.441023	4.55256e-05		0.441023	6.6596e-05		0.441023	8.89439e-05
0.443916	0.00137091		0.443916	0.00170486		0.443916	3.17836e-05		0.443916	4.52808e-05		0.443916	6.6231e-05		0.443916	8.83296e-05
0.44681	0.0014269		0.44681	0.00169402		0.44681	3.16567e-05		0.44681	4.50342e-05		0.44681	6.58643e-05		0.44681	8.77105e-05
0.449704	0.00146895		0.449704	0.0016758		0.449704	3.153e-05		0.449704	4.47857e-05		0.449704	6.54964e-05		0.449704	8.70888e-05
0.452598	0.00149841		0.452598	0.00165036		0.452598	3.14037e-05		0.452598	4.45352e-05		0.452598	6.51275e-05		0.452598	8.64667e-05
0.455492	0.00151543		0.455492	0.00161879		0.455492	3.12779e-05		0.455492	4.42825e-05		0.455492	6.47579e-05		0.455492	8.58444e-05
0.458386	0.00152018		0.458386	0.0015821		0.458386	3.11529e-05		0.458386	4.40274e-05		0.458386	6.43878e-05		0.458386	8.5222e-05
0.46128	0.00151564		0.46128	0.00154115		0.46128	3.10289e-05		0.46128	4.37696e-05		0.46128	6.4017e-05		0.46128	8.45998e-05
0.464174	0.00150355		0.464174	0.00149675		0.464174	3.09061e-05		0.464174	4.35115e-05		0.464174	6.36458e-05		0.464174	8.3978e-05
0.467068	0.00148467		0.467068	0.00144957		0.467068	3.07849e-05		0.467068	4.32557e-05		0.467068	6.32743e-05		0.467068	8.33568e-05
0.469961	0.00146014		0.469961	0.00140031		0.469961	3.06656e-05		0.469961	4.30026e-05		0.469961	6.29028e-05		0.469961	8.27363e-05
0.472855	0.0014287		0.472855	0.00134974		0.472855	3.05487e-05		0.472855	4.27524e-05		0.472855	6.25314e-05		0.472855	8.21167e-05
0.475749	0.00139141		0.475749	0.0012984		0.475749	3.04348e-05		0.475749	4.25052e-05		0.475749	6.21601e-05		0.475749	8.1498e-05
0.478643	0.00135058		0.478643	0.00124684		0.478643	3.03226e-05		0.478643	4.22615e-05		0.478643	6.17891e-05		0.478643	8.08803e-05
0.481537	0.00130645		0.481537	0.00119526		0.481537	3.021e-05		0.481537	4.20213e-05		0.481537	6.14185e-05		0.481537	8.02638e-05
0.484431	0.00125975		0.484431	0.00114391		0.484431	3.00963e-05		0.484431	4.17849e-05		0.484431	6.10484e-05		0.484431	7.96485e-05
0.487325	0.00121141		0.487325	0.00109322		0.487325	2.99813e-05		0.487325	4.15526e-05		0.487325	6.06788e-05		0.487325	7.90385e-05
0.490219	0.0011621		0.490219	0.00104339		0.490219	2.98653e-05		0.490219	4.13246e-05		0.490219	6.03097e-05		0.490219	7.84381e-05
0.493113	0.00111223		0.493113	0.000994537		0.493113	2.97483e-05		0.493113	4.11012e-05		0.493113	5.99411e-05		0.493113	7.7848e-05
0.496006	0.00106282		0.496006	0.0009468		0.496006	2.96303e-05		0.496006	4.08826e-05		0.496006	5.9573e-05		0.496006	7.72688e-05
0.4989	0.00101431		0.4989	0.000900433		0.4989	2.95114e-05		0.4989	4.06692e-05		0.4989	5.92054e-05		0.4989	7.67015e-05
0.501794	0.000966483		0.501794	0.000855604		0.501794	2.93919e-05		0.501794	4.04614e-05		0.501794	5.88396e-05		0.501794	7.61469e-05
0.504688	0.000919407		0.504688	0.000812554		0.504688	2.92716e-05		0.504688	4.02597e-05		0.504688	5.84769e-05		0.504688	7.56062e-05
0.507582	0.00087351		0.507582	0.000771342		0.507582	2.91509e-05		0.507582	4.00649e-05		0.507582	5.81177e-05		0.507582	7.50806e-05
0.510476	0.000828991		0.510476	0.00073175		0.510476	2.90297e-05		0.510476	3.98781e-05		0.510476	5.77623e-05		0.510476	7.45713e-05
0.51337	0.000785929		0.51337	0.000693811		0.51337	2.89082e-05		0.51337	3.97008e-05		0.51337	5.7411e-05		0.51337	7.40794e-05
0.516264	0.00074424		0.516264	0.000657402		0.516264	2.87863e-05		0.516264	3.95355e-05		0.516264	5.70641e-05		0.516264	7.36057e-05
0.519158	0.000704203		0.519158	0.00062245		0.519158	2.86643e-05		0.519158	3.93847e-05		0.519158	5.67223e-05		0.519158	7.31505e-05
0.522051	0.000666049		0.522051	0.000589259		0.522051	2.85421e-05		0.522051	3.92408e-05		0.522051	5.63861e-05		0.522051	7.27141e-05
0.524945	0.000629693		0.524945	0.000558144		0.524945	2.84198e-05		0.524945	3.90945e-05		0.524945	5.60561e-05		0.524945	7.23039e-05
0.524945	0.000629693		0.524945	0.000558144		0.524945	2.84198e-05		0.524945	3.90945e-05		0.524945	5.60561e-05		0.524945	7.23039e-05
0.527839	0.000595022		0.527839	0.000528928		0.527839	2.82974e-05		0.527839	3.8948e-05		0.527839	5.57307e-05		0.527839	7.19069e-05
0.530733	0.00056193		0.530733	0.000501209		0.530733	2.8175e-05		0.530733	3.88033e-05		0.530733	5.54076e-05		0.530733	7.1503e-05
0.533627	0.000530567		0.533627	0.000474881		0.533627	2.80527e-05		0.533627	3.86597e-05		0.533627	5.50868e-05		0.533627	7.10928e-05
0.536521	0.000500991		0.536521	0.000449935		0.536521	2.79302e-05		0.536521	3.85162e-05		0.536521	5.47681e-05		0.536521	7.06774e-05
0.539415	0.000473001		0.539415	0.000426397		0.539415	2.78075e-05		0.539415	3.83719e-05		0.539415	5.44513e-05		0.539415	7.02578e-05
0.542309	0.000446491		0.542309	0.000404296		0.542309	2.76844e-05		0.542309	3.82258e-05		0.542309	5.41364e-05		0.542309	6.98348e-05
0.545203	0.000421474		0.545203	0.000383598		0.545203	2.75607e-05		0.545203	3.80772e-05		0.545203	5.38232e-05		0.545203	6.94087e-05
0.548096	0.000397753		0.548096	0.00036414		0.548096	2.74361e-05		0.548096	3.79258e-05		0.548096	5.35114e-05		0.548096	6.89798e-05
0.55099	0.000375298		0.55099	0.000345744		0.55099	2.73104e-05		0.55099	3.77712e-05		0.55099	5.32005e-05		0.55099	6.85481e-05
0.553884	0.000354235		0.553884	0.000328321		0.553884	2.71846e-05		0.553884	3.76135e-05		0.553884	5.28906e-05		0.553884	6.81135e-05
0.556778	0.000334566		0.556778	0.000311774		0.556778	2.70601e-05		0.556778	3.74525e-05		0.556778	5.25814e-05		0.556778	6.76761e-05
0.559672	0.000315998		0.559672	0.000296077		0.559672	2.69368e-05		0.559672	3.72882e-05		0.559672	5.22731e-05		0.559672	6.72359e-05
0.562566	0.000298331		0.562566	0.000281241		0.562566	2.68146e-05		0.562566	3.71206e-05		0.562566	5.19656e-05		0.562566	6.67941e-05
0.56546	0.000281726		0.56546	0.000267239		0.56546	2.66934e-05		0.56546	3.69498e-05		0.56546	5.16588e-05		0.56546	6.63523e-05
0.568354	0.000266112		0.568354	0.000254062		0.568354	2.65731e-05		0.568354	3.67756e-05		0.568354	5.13527e-05		0.568354	6.59108e-05
0.571248	0.00025133		0.571248	0.000241681		0.571248	2.64536e-05		0.571248	3.65982e-05		0.571248	5.10473e-05		0.571248	6.54699e-05
0.574142	0.000237261		0.574142	0.000230062		0.574142	2.63348e-05		0.574142	3.64172e-05		0.574142	5.07426e-05		0.574142	6.503e-05
0.577035	0.000223829		0.577035	0.000219026		0.577035	2.62165e-05		0.577035	3.62326e-05		0.577035	5.04386e-05		0.577035	6.45914e-05
0.579929	0.000211077		0.579929	0.000208428		0.579929	2.60988e-05		0.579929	3.60462e-05		0.579929	5.01355e-05		0.579929	6.41544e-05
0.582823	0.000199079		0.582823	0.000198341		0.582823	2.59814e-05		0.582823	3.586e-05		0.582823	4.98338e-05		0.582823	6.37192e-05
0.585717	0.000187994		0.585717	0.000188783		0.585717	2.58644e-05		0.585717	3.56743e-05		0.585717	4.9534e-05		0.585717	6.32861e-05
0.588611	0.000177476		0.588611	0.000179812		0.588611	2.57477e-05		0.588611	3.54893e-05		0.588611	4.92362e-05		0.588611	6.28553e-05
0.591505	0.000167197		0.591505	0.000171485		0.591505	2.56314e-05		0.591505	3.5305e-05		0.591505	4.89402e-05		0.591505	6.24268e-05
0.594399	0.000157432		0.594399	0.000163759		0.594399	2.55154e-05		0.594399	3.51217e-05		0.594399	4.86461e-05		0.594399	6.20009e-05
0.597293	0.000148347		0.597293	0.000156375		0.597293	2.53999e-05		0.597293	3.49395e-05		0.597293	4.83543e-05		0.597293	6.15776e-05
0.600186	0.000140065		0.600186	0.000149083		0.600186	2.5285e-05		0.600186	3.47585e-05		0.600186	4.80648e-05		0.600186	6.1157e-05
0.60308	0.000132673		0.60308	0.00014199		0.60308	2.51708e-05		0.60308	3.45789e-05		0.60308	4.77776e-05		0.60308	6.07396e-05
0.605974	0.000126132		0.605974	0.000135228		0.605974	2.50575e-05		0.605974	3.44009e-05		0.605974	4.74928e-05		0.605974	6.0327e-05
0.608868	0.00012007		0.608868	0.000128819		0.608868	2.49454e-05		0.608868	3.42245e-05		0.608868	4.72105e-05		0.608868	5.9921e-05
0.611762	0.000114128		0.611762	0.000122776		0.611762	2.48349e-05		0.611762	3.40499e-05		0.611762	4.69308e-05		0.611762	5.95216e-05
0.614656	0.000108346		0.614656	0.000117138		0.614656	2.47262e-05		0.614656	3.38772e-05		0.614656	4.66537e-05		0.614656	5.91288e-05
0.61755	0.000102793		0.61755	0.000111974		0.61755	2.46199e-05		0.61755	3.37065e-05		0.61755	4.63793e-05		0.61755	5.87427e-05
0.620444	9.75723e-05		0.620444	0.000107317		0.620444	2.45165e-05		0.620444	3.35379e-05		0.620444	4.61077e-05		0.620444	5.83634e-05
0.623338	9.28059e-05		0.623338	0.00010316		0.623338	2.44168e-05		0.623338	3.33715e-05		0.623338	4.58389e-05		0.623338	5.79911e-05
0.626231	8.84464e-05		0.626231	9.9227e-05		0.626231	2.43189e-05		0.626231	3.32073e-05		0.626231	4.5573e-05		0.626231	5.76258e-05
0.629125	8.44319e-05		0.629125	9.53294e-05		0.629125	2.42205e-05		0.629125	3.30452e-05		0.629125	4.53099e-05		0.629125	5.72677e-05
0.632019	8.08034e-05		0.632019	9.15393e-05		0.632019	2.41218e-05		0.632019	3.28851e-05		0.632019	4.50499e-05		0.632019	5.6917e-05
0.634913	7.76709e-05		0.634913	8.78859e-05		0.634913	2.4023e-05		0.634913	3.27268e-05		0.634913	4.47931e-05		0.634913	5.65741e-05
0.637807	7.48144e-05		0.637807	8.44369e-05		0.637807	2.39243e-05		0.637807	3.25713e-05		0.637807	4.45397e-05		0.637807	5.62394e-05
0.640701	7.2001e-05		0.640701	8.12871e-05		0.640701	2.3826e-05		0.640701	3.24198e-05		0.640701	4.42904e-05		0.640701	5.59137e-05
0.643595	6.9366e-05		0.643595	7.85514e-05		0.643595	2.37286e-05		0.643595	3.22731e-05		0.643595	4.40479e-05		0.643595	5.55982e-05
0.643595	6.9366e-05		0.643595	7.85514e-05		0.643595	2.37286e-05		0.643595	3.22731e-05		0.643595	4.40479e-05		0.643595	5.55982e-05
0.646489	6.69178e-05		0.646489	7.61471e-05		0.646489	2.3632e-05		0.646489	3.21297e-05		0.646489	4.38117e-05		0.646489	5.52874e-05
0.649383	6.45997e-05		0.649383	7.39074e-05		0.649383	2.35354e-05		0.649383	3.1987e-05		0.649383	4.35786e-05		0.649383	5.4976e-05
0.652277	6.24111e-05		0.652277	7.1808e-05		0.652277	2.34389e-05		0.652277	3.1845e-05		0.652277	4.33482e-05		0.652277	5.46653e-05
0.65517	6.03426e-05		0.65517	6.98217e-05		0.65517	2.33424e-05		0.65517	3.17032e-05		0.65517	4.31201e-05		0.65517	5.43549e-05
0.658064	5.83786e-05		0.658064	6.79235e-05		0.658064	2.32459e-05		0.658064	3.15615e-05		0.658064	4.28936e-05		0.658064	5.40446e-05
0.660958	5.65029e-05		0.660958	6.60899e-05		0.660958	2.31492e-05		0.660958	3.14197e-05		0.660958	4.26684e-05		0.660958	5.37343e-05
0.663852	5.47017e-05		0.663852	6.43032e-05		0.663852	2.30524e-05		0.663852	3.12777e-05		0.663852	4.24441e-05		0.663852	5.3424e-05
0.666746	5.29637e-05		0.666746	6.25733e-05		0.666746	2.29553e-05		0.666746	3.11356e-05		0.666746	4.22208e-05		0.666746	5.31136e-05
0.66964	5.12828e-05		0.66964	6.08985e-05		0.66964	2.28579e-05		0.66964	3.09933e-05		0.66964	4.19981e-05		0.66964	5.28029e-05
0.672534	4.96557e-05		0.672534	5.92551e-05		0.672534	2.27602e-05		0.672534	3.0851e-05		0.672534	4.1776e-05		0.672534	5.24918e-05
0.675428	4.8079e-05		0.675428	5.7633e-05		0.675428	2.26619e-05		0.675428	3.07085e-05		0.675428	4.15544e-05		0.675428	5.21802e-05
0.678322	4.65489e-05		0.678322	5.60478e-05		0.678322	2.25629e-05		0.678322	3.05658e-05		0.678322	4.13333e-05		0.678322	5.18678e-05
0.681215	4.50662e-05		0.681215	5.45206e-05		0.681215	2.24632e-05		0.681215	3.04228e-05		0.681215	4.11125e-05		0.681215	5.15544e-05
0.684109	4.36324e-05		0.684109	5.30524e-05		0.684109	2.23624e-05		0.684109	3.02796e-05		0.684109	4.08921e-05		0.684109	5.12396e-05
0.687003	4.22442e-05		0.687003	5.16443e-05		0.687003	2.22604e-05		0.687003	3.01358e-05		0.687003	4.06717e-05		0.687003	5.09229e-05
0.689897	4.08974e-05		0.689897	5.02984e-05		0.689897	2.2157e-05		0.689897	2.99915e-05		0.689897	4.04514e-05		0.689897	5.06038e-05
0.692791	3.96065e-05		0.692791	4.90067e-05		0.692791	2.20518e-05		0.692791	2.98464e-05		0.692791	4.02307e-05		0.692791	5.02843e-05
0.695685	3.83907e-05		0.695685	4.77622e-05		0.695685	2.19446e-05		0.695685	2.97003e-05		0.695685	4.00093e-05		0.695685	4.99673e-05
0.698579	3.7254e-05		0.698579	4.65697e-05		0.698579	2.18349e-05		0.698579	2.95531e-05		0.698579	3.97865e-05		0.698579	4.96531e-05
0.701473	3.62012e-05		0.701473	4.54359e-05		0.701473	2.17251e-05		0.701473	2.94056e-05		0.701473	3.95616e-05		0.701473	4.93418e-05
0.704367	3.5239e-05		0.704367	4.43699e-05		0.704367	2.16175e-05		0.704367	2.9259e-05		0.704367	3.93333e-05		0.704367	4.90336e-05
0.70726	3.43792e-05		0.70726	4.33701e-05		0.70726	2.15124e-05		0.70726	2.91132e-05		0.70726	3.91002e-05		0.70726	4.87289e-05
0.710154	3.36418e-05		0.710154	4.2436e-05		0.710154	2.14099e-05		0.710154	2.89684e-05		0.710154	3.88602e-05		0.710154	4.84283e-05
0.713048	3.30131e-05		0.713048	4.15825e-05		0.713048	2.13103e-05		0.713048	2.88246e-05		0.713048	3.861e-05		0.713048	4.81326e-05
0.715942	3.24799e-05		0.715942	4.08316e-05		0.715942	2.12142e-05		0.715942	2.86822e-05		0.715942	3.8345e-05		0.715942	4.78432e-05
0.715942	3.24799e-05		0.715942	4.08316e-05		0.715942	2.12142e-05		0.715942	2.86822e-05		0.715942	3.8345e-05		0.715942	4.78432e-05
0.718836	3.20105e-05		0.718836	4.01533e-05		0.718836	2.11204e-05		0.718836	2.85404e-05		0.718836	3.8072e-05		0.718836	4.75572e-05
0.72173	3.15595e-05		0.72173	3.95037e-05		0.72173	2.10275e-05		0.72173	2.83985e-05		0.72173	3.78002e-05		0.72173	4.72709e-05
0.724624	3.11264e-05		0.724624	3.88823e-05		0.724624	2.09352e-05		0.724624	2.82562e-05		0.724624	3.75297e-05		0.724624	4.69839e-05
0.727518	3.07136e-05		0.727518	3.82887e-05		0.727518	2.08434e-05		0.727518	2.81135e-05		0.727518	3.72605e-05		0.727518	4.66956e-05
0.730412	3.032e-05		0.730412	3.77191e-05		0.730412	2.0752e-05		0.730412	2.79702e-05		0.730412	3.69929e-05		0.730412	4.64051e-05
0.733305	2.99404e-05		0.733305	3.71692e-05		0.733305	2.06607e-05		0.733305	2.78259e-05		0.733305	3.67274e-05		0.733305	4.61119e-05
0.736199	2.95697e-05		0.736199	3.66348e-05		0.736199	2.05694e-05		0.736199	2.76806e-05		0.736199	3.64641e-05		0.736199	4.58149e-05
0.739093	2.92032e-05		0.739093	3.61122e-05		0.739093	2.04776e-05		0.739093	2.7534e-05		0.739093	3.62036e-05		0.739093	4.55136e-05
0.741987	2.88368e-05		0.741987	3.55978e-05		0.741987	2.03854e-05		0.741987	2.73858e-05		0.741987	3.59462e-05		0.741987	4.5208e-05
0.744881	2.84669e-05		0.744881	3.50917e-05		0.744881	2.02923e-05		0.744881	2.72356e-05		0.744881	3.56925e-05		0.744881	4.48981e-05
0.747775	2.80946e-05		0.747775	3.45945e-05		0.747775	2.01982e-05		0.747775	2.70832e-05		0.747775	3.54432e-05		0.747775	4.45831e-05
0.750669	2.77236e-05		0.750669	3.41037e-05		0.750669	2.01026e-05		0.750669	2.69281e-05		0.750669	3.51956e-05		0.750669	4.4262e-05
0.753563	2.73532e-05		0.753563	3.36171e-05		0.753563	2.00053e-05		0.753563	2.67699e-05		0.753563	3.49449e-05		0.753563	4.39338e-05
0.756457	2.69807e-05		0.756457	3.31323e-05		0.756457	1.9906e-05		0.756457	2.66081e-05		0.756457	3.46896e-05		0.756457	4.35974e-05
0.75935	2.6604e-05		0.75935	3.26472e-05		0.75935	1.98042e-05		0.75935	2.64423e-05		0.75935	3.44297e-05		0.75935	4.32517e-05
0.762244	2.62213e-05		0.762244	3.21599e-05		0.762244	1.96995e-05		0.762244	2.62718e-05		0.762244	3.41649e-05		0.762244	4.28955e-05
0.765138	2.58309e-05		0.765138	3.16687e-05		0.765138	1.95915e-05		0.765138	2.60963e-05		0.765138	3.38952e-05		0.765138	4.25278e-05
0.768032	2.54314e-05		0.768032	3.11753e-05		0.768032	1.94797e-05		0.768032	2.59157e-05		0.768032	3.36203e-05		0.768032	4.21472e-05
0.770926	2.50263e-05		0.770926	3.0682e-05		0.770926	1.93639e-05		0.770926	2.57295e-05		0.770926	3.334e-05		0.770926	4.17528e-05
0.77382	2.462e-05		0.77382	3.01881e-05		0.77382	1.92437e-05		0.77382	2.55373e-05		0.77382	3.30545e-05		0.77382	4.13435e-05
0.776714	2.42129e-05		0.776714	2.96934e-05		0.776714	1.91199e-05		0.776714	2.53389e-05		0.776714	3.27636e-05		0.776714	4.09183e-05
0.779608	2.38059e-05		0.779608	2.91976e-05		0.779608	1.89933e-05		0.779608	2.51341e-05		0.779608	3.24678e-05		0.779608	4.04776e-05
0.782502	2.34001e-05		0.782502	2.87009e-05		0.782502	1.88633e-05		0.782502	2.49231e-05		0.782502	3.21673e-05		0.782502	4.00224e-05
0.785396	2.29978e-05		0.785396	2.82032e-05		0.785396	1.87296e-05		0.785396	2.47058e-05		0.785396	3.18629e-05		0.785396	3.95528e-05
0.788289	2.26013e-05		0.788289	2.77087e-05		0.788289	1.85923e-05		0.788289	2.44828e-05		0.788289	3.15553e-05		0.788289	3.90694e-05
0.791183	2.22131e-05		0.791183	2.72285e-05		0.791183	1.84515e-05		0.791183	2.42543e-05		0.791183	3.12456e-05		0.791183	3.85729e-05
0.794077	2.18395e-05		0.794077	2.67708e-05		0.794077	1.83074e-05		0.794077	2.40209e-05		0.794077	3.09315e-05		0.794077	3.80642e-05
0.796971	2.14869e-05		0.796971	2.63374e-05		0.796971	1.81601e-05		0.796971	2.37829e-05		0.796971	3.0611e-05		0.796971	3.75441e-05
0.799865	2.1157e-05		0.799865	2.59287e-05		0.799865	1.80098e-05		0.799865	2.35408e-05		0.799865	3.02845e-05		0.799865	3.70128e-05
0.799865	2.1157e-05		0.799865	2.59287e-05		0.799865	1.80098e-05		0.799865	2.35408e-05		0.799865	3.02845e-05		0.799865	3.70128e-05
0.802759	2.08372e-05		0.802759	2.55304e-05		0.802759	1.78549e-05		0.802759	2.32926e-05		0.802759	2.99474e-05		0.802759	3.64651e-05
0.805653	2.05153e-05		0.805653	2.51288e-05		0.805653	1.76938e-05		0.805653	2.30366e-05		0.805653	2.95947e-05		0.805653	3.5899e-05
0.808547	2.01931e-05		0.808547	2.47258e-05		0.808547	1.75265e-05		0.808547	2.27725e-05		0.808547	2.92266e-05		0.808547	3.53188e-05
0.811441	1.98722e-05		0.811441	2.43231e-05		0.811441	1.73525e-05		0.811441	2.25006e-05		0.811441	2.88436e-05		0.811441	3.47254e-05
0.814334	1.9553e-05		0.814334	2.39205e-05		0.814334	1.71719e-05		0.814334	2.22208e-05		0.814334	2.84456e-05		0.814334	3.4119e-05
0.817228	1.92367e-05		0.817228	2.35174e-05		0.817228	1.69842e-05		0.817228	2.1933e-05		0.817228	2.8033e-05		0.817228	3.34998e-05
0.820122	1.89237e-05		0.820122	2.31125e-05		0.820122	1.67892e-05		0.820122	2.16371e-05		0.820122	2.76066e-05		0.820122	3.28676e-05
0.823016	1.86133e-05		0.823016	2.27041e-05		0.823016	1.65857e-05		0.823016	2.13331e-05		0.823016	2.71672e-05		0.823016	3.22222e-05
0.82591	1.83039e-05		0.82591	2.22928e-05		0.82591	1.63725e-05		0.82591	2.10212e-05		0.82591	2.6715e-05		0.82591	3.15663e-05
0.828804	1.79942e-05		0.828804	2.18799e-05		0.828804	1.6149e-05		0.828804	2.07016e-05		0.828804	2.62502e-05		0.828804	3.09036e-05
0.831698	1.76837e-05		0.831698	2.14642e-05		0.831698	1.59151e-05		0.831698	2.03745e-05		0.831698	2.57732e-05		0.831698	3.02348e-05
0.834592	1.7372e-05		0.834592	2.10449e-05		0.834592	1.56705e-05		0.834592	2.00398e-05		0.834592	2.52844e-05		0.834592	2.95602e-05
0.837486	1.70596e-05		0.837486	2.06213e-05		0.837486	1.54149e-05		0.837486	1.96975e-05		0.837486	2.47849e-05		0.837486	2.88805e-05
0.840379	1.67473e-05		0.840379	2.01944e-05		0.840379	1.51483e-05		0.840379	1.93481e-05		0.840379	2.4278e-05		0.840379	2.81967e-05
0.843273	1.64344e-05		0.843273	1.97655e-05		0.843273	1.48708e-05		0.843273	1.89925e-05		0.843273	2.37659e-05		0.843273	2.75157e-05
0.846167	1.61207e-05		0.846167	1.93368e-05		0.846167	1.45827e-05		0.846167	1.86321e-05		0.846167	2.32501e-05		0.846167	2.68451e-05
0.849061	1.58061e-05		0.849061	1.8911e-05		0.849061	1.42877e-05		0.849061	1.82681e-05		0.849061	2.27316e-05		0.849061	2.61867e-05
0.851955	1.54907e-05		0.851955	1.84888e-05		0.851955	1.39905e-05		0.851955	1.79021e-05		0.851955	2.22118e-05		0.851955	2.55426e-05
0.854849	1.5175e-05		0.854849	1.8071e-05		0.854849	1.36923e-05		0.854849	1.75371e-05		0.854849	2.16963e-05		0.854849	2.4915e-05
0.857743	1.48602e-05		0.857743	1.76584e-05		0.857743	1.33948e-05		0.857743	1.71764e-05		0.857743	2.11924e-05		0.857743	2.4317e-05
0.860637	1.4553e-05		0.860637	1.72518e-05		0.860637	1.31e-05		0.860637	1.6823e-05		0.860637	2.0704e-05		0.860637	2.37645e-05
0.863531	1.42617e-05		0.863531	1.68615e-05		0.863531	1.2811e-05		0.863531	1.64811e-05		0.863531	2.02356e-05		0.863531	2.32659e-05
0.866424	1.39917e-05		0.866424	1.65006e-05		0.866424	1.25332e-05		0.866424	1.61563e-05		0.866424	1.97935e-05		0.866424	2.28333e-05
0.869318	1.37513e-05		0.869318	1.61765e-05		0.869318	1.22773e-05		0.869318	1.58568e-05		0.869318	1.93869e-05		0.869318	2.24849e-05
0.872212	1.3549e-05		0.872212	1.59026e-05		0.872212	1.20574e-05		0.872212	1.55983e-05		0.872212	1.90376e-05		0.872212	2.221e-05
0.875106	1.33999e-05		0.875106	1.5701e-05		0.875106	1.18929e-05		0.875106	1.54056e-05		0.875106	1.87802e-05		0.875106	2.20031e-05
0.878	1.33411e-05		0.878	1.5622e-05		0.878	1.18268e-05		0.878	1.53293e-05		0.878	1.86791e-05		0.878	2.19206e-05

## Sheet: oh distribution 
SN 0			SN 0.2			SN 0.4			SN 0.6			SN 0.8			SN 1
Axial distance	oh mass fraction		Axial distance	oh mass fraction		Axial distance	oh mass fraction		Axial distance	oh mass fraction		Axial distance	oh mass fraction		Axial distance	oh mass fraction
0.00115113	0.000211272		0.00115113	0.000211031		0.00115113	0.000230948		0.00115113	0.000215149		0.00115113	0.000217382		0.00115113	0.000216714
0.00404502	0.000190318		0.00404502	0.000185271		0.00404502	0.000190689		0.00404502	0.000223749		0.00404502	0.000242957		0.00404502	0.000239738
0.00693891	0.0001413		0.00693891	0.000139123		0.00693891	0.00014309		0.00693891	0.000154266		0.00693891	0.00018331		0.00693891	0.000173553
0.0098328	9.60839e-05		0.0098328	9.88929e-05		0.0098328	0.000102509		0.0098328	9.73549e-05		0.0098328	0.000110074		0.0098328	0.000100823
0.0127267	7.49233e-05		0.0127267	7.67106e-05		0.0127267	8.07851e-05		0.0127267	6.65172e-05		0.0127267	6.30322e-05		0.0127267	5.35394e-05
0.0156206	6.11511e-05		0.0156206	6.35915e-05		0.0156206	6.32968e-05		0.0156206	4.55782e-05		0.0156206	3.86505e-05		0.0156206	2.45118e-05
0.0185145	5.0509e-05		0.0185145	5.36074e-05		0.0185145	4.84244e-05		0.0185145	2.96469e-05		0.0185145	2.29345e-05		0.0185145	8.05963e-06
0.0214084	4.27819e-05		0.0214084	4.66944e-05		0.0214084	3.69561e-05		0.0214084	1.8753e-05		0.0214084	1.13504e-05		0.0214084	1.32097e-06
0.0243023	3.75665e-05		0.0243023	4.19144e-05		0.0243023	2.7682e-05		0.0243023	1.14133e-05		0.0243023	5.58486e-06		0.0243023	6.71179e-07
0.0271961	3.30262e-05		0.0271961	3.76314e-05		0.0271961	1.99389e-05		0.0271961	5.83589e-06		0.0271961	3.69322e-06		0.0271961	1.77133e-06
0.03009	2.80362e-05		0.03009	3.2978e-05		0.03009	1.33534e-05		0.03009	2.53221e-06		0.03009	2.49962e-06		0.03009	1.66533e-06
0.0329839	2.32222e-05		0.0329839	2.86616e-05		0.0329839	7.70033e-06		0.0329839	8.47242e-07		0.0329839	1.12756e-06		0.0329839	6.46762e-07
0.0358778	1.79144e-05		0.0358778	2.4787e-05		0.0358778	2.91702e-06		0.0358778	1.64208e-07		0.0358778	2.39423e-07		0.0358778	8.1586e-08
0.0387717	1.24572e-05		0.0387717	2.05387e-05		0.0387717	3.66827e-07		0.0387717	3.79861e-09		0.0387717	2.10928e-17		0.0387717	4.74017e-17
0.0416656	9.92349e-06		0.0416656	1.40632e-05		0.0416656	0		0.0416656	8.12135e-18		0.0416656	9.40613e-17		0.0416656	3.96835e-17
0.0445595	1.18628e-05		0.0445595	7.48927e-06		0.0445595	0		0.0445595	8.12135e-18		0.0445595	1.29069e-16		0.0445595	0
0.0474534	1.68041e-05		0.0474534	4.58849e-06		0.0474534	6.19284e-07		0.0474534	0		0.0474534	1.01542e-16		0.0474534	5.0141e-17
0.0503473	2.39434e-05		0.0503473	5.94765e-06		0.0503473	4.03963e-06		0.0503473	6.77897e-17		0.0503473	1.19786e-06		0.0503473	6.43067e-17
0.0532412	3.28543e-05		0.0532412	1.12924e-05		0.0532412	9.94817e-06		0.0532412	1.04377e-05		0.0532412	9.99824e-06		0.0532412	1.41658e-17
0.056135	4.30709e-05		0.056135	1.97735e-05		0.056135	1.54757e-05		0.056135	3.42592e-05		0.056135	4.28213e-05		0.056135	6.35907e-07
0.0590289	5.16952e-05		0.0590289	2.955e-05		0.0590289	2.00085e-05		0.0590289	2.91477e-05		0.0590289	4.37973e-05		0.0590289	5.71392e-06
0.0619228	5.6065e-05		0.0619228	3.73032e-05		0.0619228	2.37133e-05		0.0619228	5.32624e-06		0.0619228	9.77644e-06		0.0619228	2.70245e-05
0.0648167	5.43587e-05		0.0648167	4.08525e-05		0.0648167	2.61593e-05		0.0648167	7.88059e-06		0.0648167	6.46184e-17		0.0648167	3.05497e-05
0.0677106	4.59638e-05		0.0677106	3.89314e-05		0.0677106	2.65865e-05		0.0677106	3.94769e-05		0.0677106	1.2949e-05		0.0677106	8.97035e-06
0.0706045	3.41508e-05		0.0706045	3.12583e-05		0.0706045	2.47512e-05		0.0706045	9.36656e-05		0.0706045	5.36895e-05		0.0706045	3.67062e-07
0.0734984	2.36445e-05		0.0734984	2.202e-05		0.0734984	1.60125e-05		0.0734984	0.000148916		0.0734984	9.47395e-05		0.0734984	4.41659e-06
0.0763923	1.67746e-05		0.0763923	1.53851e-05		0.0763923	2.89829e-05		0.0763923	0.000197957		0.0763923	0.000123829		0.0763923	2.35966e-05
0.0792862	1.29564e-05		0.0792862	1.26709e-05		0.0792862	5.0873e-05		0.0792862	0.000205235		0.0792862	0.00014532		0.0792862	6.16938e-05
0.0821801	1.32191e-05		0.0821801	1.4098e-05		0.0821801	3.88644e-05		0.0821801	0.000164559		0.0821801	0.000130061		0.0821801	9.5775e-05
0.085074	1.68841e-05		0.085074	1.80787e-05		0.085074	1.71651e-05		0.085074	0.000123087		0.085074	9.3204e-05		0.085074	0.000119
0.085074	1.68841e-05		0.085074	1.80787e-05		0.085074	1.71651e-05		0.085074	0.000123087		0.085074	9.3204e-05		0.085074	0.000119
0.0879678	2.05599e-05		0.0879678	2.43498e-05		0.0879678	7.07049e-06		0.0879678	9.259e-05		0.0879678	6.65719e-05		0.0879678	0.000132536
0.0908617	1.74053e-05		0.0908617	2.75609e-05		0.0908617	1.12127e-05		0.0908617	7.07256e-05		0.0908617	4.86042e-05		0.0908617	0.000116151
0.0937556	8.36803e-06		0.0937556	2.33038e-05		0.0937556	3.24419e-05		0.0937556	5.47715e-05		0.0937556	3.62276e-05		0.0937556	8.41867e-05
0.0966495	4.22687e-06		0.0966495	1.97372e-05		0.0966495	6.73891e-05		0.0966495	4.27985e-05		0.0966495	2.74241e-05		0.0966495	5.98229e-05
0.0995434	1.12514e-05		0.0995434	2.45125e-05		0.0995434	0.000110475		0.0995434	3.36361e-05		0.0995434	2.09729e-05		0.0995434	4.3332e-05
0.102437	2.63602e-05		0.102437	3.86908e-05		0.102437	0.000145402		0.102437	2.65222e-05		0.102437	1.61587e-05		0.102437	3.20429e-05
0.105331	4.23165e-05		0.105331	5.67925e-05		0.105331	0.000183212		0.105331	2.09554e-05		0.105331	1.25322e-05		0.105331	2.4093e-05
0.108225	5.71405e-05		0.108225	7.21115e-05		0.108225	0.000235701		0.108225	1.65813e-05		0.108225	9.77828e-06		0.108225	1.83687e-05
0.111119	6.91422e-05		0.111119	8.25599e-05		0.111119	0.000280377		0.111119	1.31289e-05		0.111119	7.68076e-06		0.111119	1.4185e-05
0.114013	7.79981e-05		0.114013	8.84183e-05		0.114013	0.000279053		0.114013	1.03911e-05		0.114013	6.09531e-06		0.114013	1.11017e-05
0.116907	8.48078e-05		0.116907	9.0723e-05		0.116907	0.000233939		0.116907	8.23219e-06		0.116907	4.88833e-06		0.116907	8.80575e-06
0.119801	8.91147e-05		0.119801	9.09082e-05		0.119801	0.000186056		0.119801	6.54733e-06		0.119801	3.95314e-06		0.119801	7.09994e-06
0.122695	9.12674e-05		0.122695	8.97847e-05		0.122695	0.000145865		0.122695	5.21632e-06		0.122695	3.23492e-06		0.122695	5.84864e-06
0.125588	9.21097e-05		0.125588	8.74728e-05		0.125588	0.000114314		0.125588	4.14927e-06		0.125588	2.68899e-06		0.125588	4.92908e-06
0.128482	9.18496e-05		0.128482	8.43483e-05		0.128482	8.99948e-05		0.128482	3.30238e-06		0.128482	2.27734e-06		0.128482	4.24415e-06
0.131376	9.1023e-05		0.131376	8.08272e-05		0.131376	7.12619e-05		0.131376	2.63513e-06		0.131376	1.96887e-06		0.131376	3.73739e-06
0.13427	9.02286e-05		0.13427	7.74977e-05		0.13427	5.67419e-05		0.13427	2.11257e-06		0.13427	1.73984e-06		0.13427	3.36533e-06
0.137164	8.90807e-05		0.137164	7.41975e-05		0.137164	4.54209e-05		0.137164	1.70741e-06		0.137164	1.57133e-06		0.137164	3.09323e-06
0.140058	8.72574e-05		0.140058	7.05163e-05		0.140058	3.6529e-05		0.140058	1.39649e-06		0.140058	1.44845e-06		0.140058	2.89429e-06
0.142952	8.55108e-05		0.142952	6.67689e-05		0.142952	2.94714e-05		0.142952	1.16044e-06		0.142952	1.35966e-06		0.142952	2.74927e-06
0.145846	8.43346e-05		0.145846	6.33577e-05		0.145846	2.38298e-05		0.145846	9.83178e-07		0.145846	1.29618e-06		0.145846	2.64374e-06
0.14874	8.27448e-05		0.14874	5.97801e-05		0.14874	1.9295e-05		0.14874	8.51553e-07		0.14874	1.25136e-06		0.14874	2.56691e-06
0.151633	8.08327e-05		0.151633	5.69442e-05		0.151633	1.56102e-05		0.151633	7.55009e-07		0.151633	1.22019e-06		0.151633	2.51083e-06
0.154527	7.89583e-05		0.154527	5.42713e-05		0.154527	1.26365e-05		0.154527	6.85151e-07		0.154527	1.19889e-06		0.154527	2.46971e-06
0.157421	7.67547e-05		0.157421	5.77798e-05		0.157421	1.03124e-05		0.157421	6.35352e-07		0.157421	1.18467e-06		0.157421	2.43919e-06
0.160315	7.26703e-05		0.160315	5.91513e-05		0.160315	8.46056e-06		0.160315	6.00507e-07		0.160315	1.17546e-06		0.160315	2.41616e-06
0.163209	6.94131e-05		0.163209	5.23242e-05		0.163209	6.93651e-06		0.163209	5.76698e-07		0.163209	1.16974e-06		0.163209	2.39864e-06
0.166103	6.83383e-05		0.166103	4.82343e-05		0.166103	5.71299e-06		0.166103	5.60927e-07		0.166103	1.16623e-06		0.166103	2.38489e-06
0.166103	6.83383e-05		0.166103	4.82343e-05		0.166103	5.71299e-06		0.166103	5.60927e-07		0.166103	1.16623e-06		0.166103	2.38489e-06
0.168997	6.68538e-05		0.168997	4.58035e-05		0.168997	4.72456e-06		0.168997	5.50334e-07		0.168997	1.16388e-06		0.168997	2.3727e-06
0.171891	6.53111e-05		0.171891	4.49013e-05		0.171891	3.92208e-06		0.171891	5.42778e-07		0.171891	1.16229e-06		0.171891	2.3606e-06
0.174785	6.39276e-05		0.174785	4.5235e-05		0.174785	3.28511e-06		0.174785	5.37521e-07		0.174785	1.1614e-06		0.174785	2.34864e-06
0.177678	6.2566e-05		0.177678	4.55368e-05		0.177678	2.79446e-06		0.177678	5.34192e-07		0.177678	1.16037e-06		0.177678	2.33772e-06
0.180572	6.1861e-05		0.180572	4.56202e-05		0.180572	2.41401e-06		0.180572	5.32287e-07		0.180572	1.15844e-06		0.180572	2.32648e-06
0.183466	6.16397e-05		0.183466	4.74108e-05		0.183466	2.11363e-06		0.183466	5.31175e-07		0.183466	1.15581e-06		0.183466	2.31225e-06
0.18636	6.00337e-05		0.18636	5.0675e-05		0.18636	1.8781e-06		0.18636	5.30499e-07		0.18636	1.15327e-06		0.18636	2.29667e-06
0.189254	5.93944e-05		0.189254	5.28683e-05		0.189254	1.69464e-06		0.189254	5.30528e-07		0.189254	1.15178e-06		0.189254	2.28192e-06
0.192148	6.06791e-05		0.192148	5.44277e-05		0.192148	1.55256e-06		0.192148	5.31611e-07		0.192148	1.15079e-06		0.192148	2.26726e-06
0.195042	6.11339e-05		0.195042	5.58046e-05		0.195042	1.44324e-06		0.195042	5.33177e-07		0.195042	1.14751e-06		0.195042	2.25197e-06
0.197936	6.11225e-05		0.197936	5.71659e-05		0.197936	1.35963e-06		0.197936	5.34406e-07		0.197936	1.14219e-06		0.197936	2.23592e-06
0.20083	6.137e-05		0.20083	5.7975e-05		0.20083	1.29622e-06		0.20083	5.35178e-07		0.20083	1.13763e-06		0.20083	2.21925e-06
0.203723	6.15935e-05		0.203723	5.75643e-05		0.203723	1.24869e-06		0.203723	5.35551e-07		0.203723	1.13416e-06		0.203723	2.20204e-06
0.206617	6.18794e-05		0.206617	5.62778e-05		0.206617	1.21379e-06		0.206617	5.35811e-07		0.206617	1.13113e-06		0.206617	2.18429e-06
0.209511	6.19336e-05		0.209511	5.49518e-05		0.209511	1.18899e-06		0.209511	5.36884e-07		0.209511	1.12805e-06		0.209511	2.16599e-06
0.212405	6.20071e-05		0.212405	5.38722e-05		0.212405	1.1724e-06		0.212405	5.39775e-07		0.212405	1.12486e-06		0.212405	2.14717e-06
0.215299	6.1406e-05		0.215299	5.17677e-05		0.215299	1.16215e-06		0.215299	5.43658e-07		0.215299	1.12174e-06		0.215299	2.12795e-06
0.215299	6.1406e-05		0.215299	5.17677e-05		0.215299	1.16215e-06		0.215299	5.43658e-07		0.215299	1.12174e-06		0.215299	2.12795e-06
0.218193	5.99594e-05		0.218193	4.96461e-05		0.218193	1.15607e-06		0.218193	5.46711e-07		0.218193	1.1186e-06		0.218193	2.10871e-06
0.221087	5.88963e-05		0.221087	4.94867e-05		0.221087	1.15237e-06		0.221087	5.47169e-07		0.221087	1.1151e-06		0.221087	2.08963e-06
0.223981	5.83126e-05		0.223981	5.06603e-05		0.223981	1.15037e-06		0.223981	5.45363e-07		0.223981	1.11115e-06		0.223981	2.07065e-06
0.226875	5.78951e-05		0.226875	5.21874e-05		0.226875	1.15007e-06		0.226875	5.43652e-07		0.226875	1.10674e-06		0.226875	2.05173e-06
0.229768	5.66606e-05		0.229768	5.30037e-05		0.229768	1.15082e-06		0.229768	5.42941e-07		0.229768	1.10189e-06		0.229768	2.0328e-06
0.232662	5.51611e-05		0.232662	5.32866e-05		0.232662	1.15141e-06		0.232662	5.42965e-07		0.232662	1.09663e-06		0.232662	2.01381e-06
0.235556	5.43901e-05		0.235556	5.33872e-05		0.235556	1.15146e-06		0.235556	5.43189e-07		0.235556	1.09109e-06		0.235556	1.99468e-06
0.23845	5.50753e-05		0.23845	5.39884e-05		0.23845	1.15245e-06		0.23845	5.43243e-07		0.23845	1.08553e-06		0.23845	1.97537e-06
0.241344	5.6561e-05		0.241344	5.59192e-05		0.241344	1.15621e-06		0.241344	5.42951e-07		0.241344	1.08001e-06		0.241344	1.95584e-06
0.244238	5.71494e-05		0.244238	5.97357e-05		0.244238	1.16225e-06		0.244238	5.42351e-07		0.244238	1.07442e-06		0.244238	1.93605e-06
0.247132	5.67791e-05		0.247132	6.46745e-05		0.247132	1.16748e-06		0.247132	5.41557e-07		0.247132	1.06863e-06		0.247132	1.91595e-06
0.250026	5.5736e-05		0.250026	6.9167e-05		0.250026	1.17029e-06		0.250026	5.40604e-07		0.250026	1.06256e-06		0.250026	1.89604e-06
0.25292	5.42475e-05		0.25292	7.267e-05		0.25292	1.17134e-06		0.25292	5.39485e-07		0.25292	1.05617e-06		0.25292	1.8768e-06
0.255814	5.35395e-05		0.255814	7.67996e-05		0.255814	1.17084e-06		0.255814	5.38167e-07		0.255814	1.04973e-06		0.255814	1.85813e-06
0.258707	5.30366e-05		0.258707	8.1986e-05		0.258707	1.17017e-06		0.258707	5.36591e-07		0.258707	1.04354e-06		0.258707	1.84005e-06
0.261601	5.31448e-05		0.261601	8.58157e-05		0.261601	1.17275e-06		0.261601	5.34672e-07		0.261601	1.03755e-06		0.261601	1.82258e-06
0.264495	5.50295e-05		0.264495	8.71581e-05		0.264495	1.18113e-06		0.264495	5.32338e-07		0.264495	1.03174e-06		0.264495	1.80577e-06
0.267389	5.7382e-05		0.267389	8.70092e-05		0.267389	1.19316e-06		0.267389	5.30101e-07		0.267389	1.02612e-06		0.267389	1.78961e-06
0.270283	5.98169e-05		0.270283	8.68773e-05		0.270283	1.20022e-06		0.270283	5.28656e-07		0.270283	1.0207e-06		0.270283	1.77406e-06
0.273177	6.23348e-05		0.273177	8.65725e-05		0.273177	1.19629e-06		0.273177	5.28063e-07		0.273177	1.01548e-06		0.273177	1.75911e-06
0.276071	6.52342e-05		0.276071	8.71055e-05		0.276071	1.18822e-06		0.276071	5.2814e-07		0.276071	1.01045e-06		0.276071	1.74475e-06
0.278965	6.77807e-05		0.278965	8.88814e-05		0.278965	1.18447e-06		0.278965	5.2874e-07		0.278965	1.0056e-06		0.278965	1.73097e-06
0.281859	7.03859e-05		0.281859	9.08854e-05		0.281859	1.1858e-06		0.281859	5.29769e-07		0.281859	1.00091e-06		0.281859	1.71779e-06
0.284752	7.40079e-05		0.284752	9.25208e-05		0.284752	1.19038e-06		0.284752	5.31164e-07		0.284752	9.96398e-07		0.284752	1.70526e-06
0.287646	7.80779e-05		0.287646	9.41796e-05		0.287646	1.19625e-06		0.287646	5.3288e-07		0.287646	9.92058e-07		0.287646	1.69345e-06
0.29054	8.07568e-05		0.29054	9.60056e-05		0.29054	1.20219e-06		0.29054	5.34884e-07		0.29054	9.87919e-07		0.29054	1.68246e-06
0.293434	8.14027e-05		0.293434	9.64972e-05		0.293434	1.20752e-06		0.293434	5.37147e-07		0.293434	9.83976e-07		0.293434	1.67237e-06
0.296328	8.16725e-05		0.296328	9.48734e-05		0.296328	1.2122e-06		0.296328	5.39642e-07		0.296328	9.80188e-07		0.296328	1.66195e-06
0.299222	8.19962e-05		0.299222	9.28019e-05		0.299222	1.21651e-06		0.299222	5.42358e-07		0.299222	9.76504e-07		0.299222	1.64997e-06
0.302116	8.19334e-05		0.302116	9.55874e-05		0.302116	1.2205e-06		0.302116	5.45286e-07		0.302116	9.72873e-07		0.302116	1.63649e-06
0.30501	8.22956e-05		0.30501	0.000100208		0.30501	1.22409e-06		0.30501	5.48416e-07		0.30501	9.69245e-07		0.30501	1.62152e-06
0.307904	8.37318e-05		0.307904	0.000104779		0.307904	1.22712e-06		0.307904	5.51728e-07		0.307904	9.65574e-07		0.307904	1.60504e-06
0.310797	8.61445e-05		0.310797	0.000109312		0.310797	1.22943e-06		0.310797	5.55208e-07		0.310797	9.61811e-07		0.310797	1.58706e-06
0.313691	8.95583e-05		0.313691	0.000113459		0.313691	1.23076e-06		0.313691	5.58773e-07		0.313691	9.57798e-07		0.313691	1.56757e-06
0.313691	8.95583e-05		0.313691	0.000113459		0.313691	1.23076e-06		0.313691	5.58773e-07		0.313691	9.57798e-07		0.313691	1.56757e-06
0.316585	9.30193e-05		0.316585	0.000119183		0.316585	1.23187e-06		0.316585	5.61799e-07		0.316585	9.53641e-07		0.316585	1.54777e-06
0.319479	9.57752e-05		0.319479	0.000123847		0.319479	1.23362e-06		0.319479	5.64023e-07		0.319479	9.49581e-07		0.319479	1.52876e-06
0.322373	9.77454e-05		0.322373	0.000127331		0.322373	1.23595e-06		0.322373	5.65758e-07		0.322373	9.4561e-07		0.322373	1.51033e-06
0.325267	9.81092e-05		0.325267	0.000129877		0.325267	1.23969e-06		0.325267	5.67055e-07		0.325267	9.41719e-07		0.325267	1.49229e-06
0.328161	9.74053e-05		0.328161	0.000132648		0.328161	1.24559e-06		0.328161	5.67986e-07		0.328161	9.37904e-07		0.328161	1.47446e-06
0.331055	9.73767e-05		0.331055	0.000136867		0.331055	1.25329e-06		0.331055	5.68619e-07		0.331055	9.34169e-07		0.331055	1.45666e-06
0.333949	9.66547e-05		0.333949	0.000143004		0.333949	1.26232e-06		0.333949	5.68978e-07		0.333949	9.3051e-07		0.333949	1.43869e-06
0.336842	9.765e-05		0.336842	0.000149748		0.336842	1.27235e-06		0.336842	5.69036e-07		0.336842	9.26926e-07		0.336842	1.42117e-06
0.339736	0.000100316		0.339736	0.0001548		0.339736	1.28315e-06		0.339736	5.69026e-07		0.339736	9.23408e-07		0.339736	1.40485e-06
0.34263	0.000102972		0.34263	0.000160042		0.34263	1.29463e-06		0.34263	5.69216e-07		0.34263	9.19947e-07		0.34263	1.38981e-06
0.345524	0.000106822		0.345524	0.000165645		0.345524	1.30669e-06		0.345524	5.69626e-07		0.345524	9.16525e-07		0.345524	1.37612e-06
0.348418	0.000110045		0.348418	0.000172768		0.348418	1.3192e-06		0.348418	5.7026e-07		0.348418	9.13112e-07		0.348418	1.36378e-06
0.351312	0.000111689		0.351312	0.000184407		0.351312	1.33199e-06		0.351312	5.71116e-07		0.351312	9.09665e-07		0.351312	1.35285e-06
0.354206	0.000110915		0.354206	0.000198835		0.354206	1.34494e-06		0.354206	5.72184e-07		0.354206	9.06135e-07		0.354206	1.34337e-06
0.3571	0.000108821		0.3571	0.000211407		0.3571	1.35807e-06		0.3571	5.7346e-07		0.3571	9.02469e-07		0.3571	1.33541e-06
0.359994	0.000109425		0.359994	0.000220428		0.359994	1.37154e-06		0.359994	5.74936e-07		0.359994	8.98606e-07		0.359994	1.32905e-06
0.362887	0.000115256		0.362887	0.000228005		0.362887	1.38543e-06		0.362887	5.76605e-07		0.362887	8.94493e-07		0.362887	1.3244e-06
0.365781	0.000125894		0.365781	0.000231965		0.365781	1.39973e-06		0.365781	5.78457e-07		0.365781	8.90517e-07		0.365781	1.32157e-06
0.368675	0.000135712		0.368675	0.000244229		0.368675	1.41432e-06		0.368675	5.80478e-07		0.368675	8.87061e-07		0.368675	1.32069e-06
0.371569	0.000140032		0.371569	0.00026987		0.371569	1.42898e-06		0.371569	5.82647e-07		0.371569	8.84088e-07		0.371569	1.32187e-06
0.374463	0.000146335		0.374463	0.000299226		0.374463	1.44341e-06		0.374463	5.84941e-07		0.374463	8.81578e-07		0.374463	1.32523e-06
0.377357	0.000150871		0.377357	0.000331531		0.377357	1.45737e-06		0.377357	5.87332e-07		0.377357	8.79513e-07		0.377357	1.32938e-06
0.380251	0.000159265		0.380251	0.000363586		0.380251	1.47099e-06		0.380251	5.89796e-07		0.380251	8.7788e-07		0.380251	1.33291e-06
0.383145	0.000176493		0.383145	0.00039224		0.383145	1.48445e-06		0.383145	5.92305e-07		0.383145	8.76659e-07		0.383145	1.33591e-06
0.386039	0.000199807		0.386039	0.000416451		0.386039	1.49766e-06		0.386039	5.94815e-07		0.386039	8.75832e-07		0.386039	1.33837e-06
0.388932	0.000231941		0.388932	0.000442918		0.388932	1.5104e-06		0.388932	5.97264e-07		0.388932	8.75369e-07		0.388932	1.34027e-06
0.391826	0.000264813		0.391826	0.000469906		0.391826	1.52239e-06		0.391826	5.99575e-07		0.391826	8.75236e-07		0.391826	1.34155e-06
0.39472	0.000297098		0.39472	0.000498056		0.39472	1.53307e-06		0.39472	6.01656e-07		0.39472	8.75389e-07		0.39472	1.34209e-06
0.397614	0.000332896		0.397614	0.000529036		0.397614	1.54153e-06		0.397614	6.0339e-07		0.397614	8.75773e-07		0.397614	1.34179e-06
0.400508	0.000367049		0.400508	0.000562796		0.400508	1.54843e-06		0.400508	6.04604e-07		0.400508	8.76318e-07		0.400508	1.34048e-06
0.403402	0.000393982		0.403402	0.000606703		0.403402	1.55496e-06		0.403402	6.05298e-07		0.403402	8.76974e-07		0.403402	1.338e-06
0.403402	0.000393982		0.403402	0.000606703		0.403402	1.55496e-06		0.403402	6.05298e-07		0.403402	8.76974e-07		0.403402	1.338e-06
0.406296	0.000417962		0.406296	0.000658645		0.406296	1.56214e-06		0.406296	6.05894e-07		0.406296	8.77536e-07		0.406296	1.33464e-06
0.40919	0.00044049		0.40919	0.000713706		0.40919	1.57119e-06		0.40919	6.06719e-07		0.40919	8.77803e-07		0.40919	1.33062e-06
0.412084	0.000463186		0.412084	0.00076621		0.412084	1.58159e-06		0.412084	6.07754e-07		0.412084	8.77944e-07		0.412084	1.32606e-06
0.414977	0.000487367		0.414977	0.000812495		0.414977	1.59225e-06		0.414977	6.08954e-07		0.414977	8.78105e-07		0.414977	1.32129e-06
0.417871	0.000513556		0.417871	0.000849189		0.417871	1.60294e-06		0.417871	6.10272e-07		0.417871	8.78244e-07		0.417871	1.31643e-06
0.420765	0.000543355		0.420765	0.000872273		0.420765	1.61383e-06		0.420765	6.11669e-07		0.420765	8.78329e-07		0.420765	1.31147e-06
0.423659	0.000578298		0.423659	0.000881909		0.423659	1.62504e-06		0.423659	6.13112e-07		0.423659	8.78343e-07		0.423659	1.30637e-06
0.426553	0.000618044		0.426553	0.000879742		0.426553	1.63661e-06		0.426553	6.14581e-07		0.426553	8.78274e-07		0.426553	1.3011e-06
0.429447	0.000657829		0.429447	0.000866956		0.429447	1.64849e-06		0.429447	6.1605e-07		0.429447	8.78122e-07		0.429447	1.29561e-06
0.432341	0.000692277		0.432341	0.000846037		0.432341	1.66068e-06		0.432341	6.17498e-07		0.432341	8.77888e-07		0.432341	1.28987e-06
0.435235	0.00071898		0.435235	0.000819341		0.435235	1.67319e-06		0.435235	6.18927e-07		0.435235	8.77575e-07		0.435235	1.28387e-06
0.438129	0.000739165		0.438129	0.00078798		0.438129	1.68603e-06		0.438129	6.20345e-07		0.438129	8.77191e-07		0.438129	1.27761e-06
0.441023	0.000750622		0.441023	0.000754007		0.441023	1.6992e-06		0.441023	6.21751e-07		0.441023	8.7674e-07		0.441023	1.27106e-06
0.443916	0.000751303		0.443916	0.000717755		0.443916	1.71264e-06		0.443916	6.23138e-07		0.443916	8.76224e-07		0.443916	1.26416e-06
0.44681	0.000742613		0.44681	0.000678219		0.44681	1.72635e-06		0.44681	6.24479e-07		0.44681	8.75631e-07		0.44681	1.25682e-06
0.449704	0.000725114		0.449704	0.000637989		0.449704	1.74036e-06		0.449704	6.25708e-07		0.449704	8.74935e-07		0.449704	1.24931e-06
0.452598	0.000701241		0.452598	0.00059879		0.452598	1.75457e-06		0.452598	6.26788e-07		0.452598	8.741e-07		0.452598	1.2419e-06
0.455492	0.000672458		0.455492	0.00056108		0.455492	1.7689e-06		0.455492	6.27815e-07		0.455492	8.73112e-07		0.455492	1.23457e-06
0.458386	0.000641571		0.458386	0.000524957		0.458386	1.78325e-06		0.458386	6.28809e-07		0.458386	8.72128e-07		0.458386	1.22732e-06
0.46128	0.00060903		0.46128	0.000490055		0.46128	1.79755e-06		0.46128	6.29571e-07		0.46128	8.71292e-07		0.46128	1.22015e-06
0.464174	0.000573434		0.464174	0.000456083		0.464174	1.81168e-06		0.464174	6.30251e-07		0.464174	8.70599e-07		0.464174	1.21304e-06
0.467068	0.000536955		0.467068	0.000423344		0.467068	1.82553e-06		0.467068	6.31158e-07		0.467068	8.70033e-07		0.467068	1.20594e-06
0.469961	0.00050189		0.469961	0.000392089		0.469961	1.83894e-06		0.469961	6.32356e-07		0.469961	8.69544e-07		0.469961	1.19883e-06
0.472855	0.000468017		0.472855	0.000362469		0.472855	1.85173e-06		0.472855	6.33871e-07		0.472855	8.6908e-07		0.472855	1.19168e-06
0.475749	0.000434782		0.475749	0.000334696		0.475749	1.86365e-06		0.475749	6.35697e-07		0.475749	8.68762e-07		0.475749	1.18448e-06
0.478643	0.000402771		0.478643	0.000308704		0.478643	1.87526e-06		0.478643	6.37832e-07		0.478643	8.68672e-07		0.478643	1.17722e-06
0.481537	0.000372394		0.481537	0.000284425		0.481537	1.88764e-06		0.481537	6.40275e-07		0.481537	8.6863e-07		0.481537	1.16987e-06
0.484431	0.000344236		0.484431	0.000261932		0.484431	1.90112e-06		0.484431	6.43022e-07		0.484431	8.68503e-07		0.484431	1.1624e-06
0.487325	0.000318514		0.487325	0.000241068		0.487325	1.91571e-06		0.487325	6.46034e-07		0.487325	8.68319e-07		0.487325	1.15513e-06
0.490219	0.000294283		0.490219	0.000221609		0.490219	1.93136e-06		0.490219	6.49244e-07		0.490219	8.68101e-07		0.490219	1.1484e-06
0.493113	0.000270828		0.493113	0.000203644		0.493113	1.94797e-06		0.493113	6.52618e-07		0.493113	8.67818e-07		0.493113	1.14222e-06
0.496006	0.000248575		0.496006	0.000186988		0.496006	1.96549e-06		0.496006	6.56146e-07		0.496006	8.67413e-07		0.496006	1.13658e-06
0.4989	0.000227842		0.4989	0.000171552		0.4989	1.98382e-06		0.4989	6.59819e-07		0.4989	8.66833e-07		0.4989	1.13148e-06
0.501794	0.000208772		0.501794	0.000157378		0.501794	2.00288e-06		0.501794	6.63621e-07		0.501794	8.66281e-07		0.501794	1.12693e-06
0.504688	0.000191272		0.504688	0.000144533		0.504688	2.02256e-06		0.504688	6.67528e-07		0.504688	8.65948e-07		0.504688	1.12293e-06
0.507582	0.00017511		0.507582	0.000132948		0.507582	2.04273e-06		0.507582	6.71508e-07		0.507582	8.65778e-07		0.507582	1.11949e-06
0.510476	0.000160297		0.510476	0.000122188		0.510476	2.06322e-06		0.510476	6.75522e-07		0.510476	8.65751e-07		0.510476	1.11663e-06
0.51337	0.000146885		0.51337	0.000112233		0.51337	2.08382e-06		0.51337	6.79529e-07		0.51337	8.65856e-07		0.51337	1.11435e-06
0.516264	0.000134641		0.516264	0.000102977		0.516264	2.10425e-06		0.516264	6.83488e-07		0.516264	8.66078e-07		0.516264	1.11261e-06
0.519158	0.000123396		0.519158	9.43627e-05		0.519158	2.12411e-06		0.519158	6.8736e-07		0.519158	8.66383e-07		0.519158	1.11138e-06
0.522051	0.000113141		0.522051	8.66274e-05		0.522051	2.14285e-06		0.522051	6.91096e-07		0.522051	8.66706e-07		0.522051	1.11054e-06
0.524945	0.000103814		0.524945	7.9824e-05		0.524945	2.15974e-06		0.524945	6.94598e-07		0.524945	8.66947e-07		0.524945	1.11044e-06
0.524945	0.000103814		0.524945	7.9824e-05		0.524945	2.15974e-06		0.524945	6.94598e-07		0.524945	8.66947e-07		0.524945	1.11044e-06
0.527839	9.53107e-05		0.527839	7.36802e-05		0.527839	2.17568e-06		0.527839	6.98092e-07		0.527839	8.67185e-07		0.527839	1.11082e-06
0.530733	8.74765e-05		0.530733	6.79769e-05		0.530733	2.19201e-06		0.530733	7.01871e-07		0.530733	8.67561e-07		0.530733	1.11107e-06
0.533627	8.03129e-05		0.533627	6.26879e-05		0.533627	2.20865e-06		0.533627	7.05914e-07		0.533627	8.68057e-07		0.533627	1.11121e-06
0.536521	7.37749e-05		0.536521	5.78179e-05		0.536521	2.22548e-06		0.536521	7.10191e-07		0.536521	8.68646e-07		0.536521	1.11126e-06
0.539415	6.7755e-05		0.539415	5.33518e-05		0.539415	2.24236e-06		0.539415	7.14673e-07		0.539415	8.69296e-07		0.539415	1.11125e-06
0.542309	6.22238e-05		0.542309	4.92747e-05		0.542309	2.25915e-06		0.542309	7.1934e-07		0.542309	8.69967e-07		0.542309	1.11119e-06
0.545203	5.72074e-05		0.545203	4.5562e-05		0.545203	2.27564e-06		0.545203	7.24176e-07		0.545203	8.70613e-07		0.545203	1.11106e-06
0.548096	5.26301e-05		0.548096	4.21747e-05		0.548096	2.29152e-06		0.548096	7.29154e-07		0.548096	8.71323e-07		0.548096	1.11083e-06
0.55099	4.84925e-05		0.55099	3.90707e-05		0.55099	2.30637e-06		0.55099	7.34241e-07		0.55099	8.72207e-07		0.55099	1.11045e-06
0.553884	4.48156e-05		0.553884	3.62276e-05		0.553884	2.32126e-06		0.553884	7.39402e-07		0.553884	8.73236e-07		0.553884	1.10987e-06
0.556778	4.14923e-05		0.556778	3.35918e-05		0.556778	2.33747e-06		0.556778	7.44596e-07		0.556778	8.74377e-07		0.556778	1.10904e-06
0.559672	3.83736e-05		0.559672	3.11312e-05		0.559672	2.35503e-06		0.559672	7.49777e-07		0.559672	8.75598e-07		0.559672	1.1079e-06
0.562566	3.542e-05		0.562566	2.88672e-05		0.562566	2.37391e-06		0.562566	7.54891e-07		0.562566	8.76861e-07		0.562566	1.10668e-06
0.56546	3.26916e-05		0.56546	2.6801e-05		0.56546	2.394e-06		0.56546	7.59881e-07		0.56546	8.78132e-07		0.56546	1.1056e-06
0.568354	3.01894e-05		0.568354	2.4918e-05		0.568354	2.41522e-06		0.568354	7.64683e-07		0.568354	8.79369e-07		0.568354	1.10468e-06
0.571248	2.7892e-05		0.571248	2.32004e-05		0.571248	2.43749e-06		0.571248	7.69227e-07		0.571248	8.80532e-07		0.571248	1.10388e-06
0.574142	2.57818e-05		0.574142	2.1632e-05		0.574142	2.46073e-06		0.574142	7.73433e-07		0.574142	8.81576e-07		0.574142	1.10321e-06
0.577035	2.38523e-05		0.577035	2.01824e-05		0.577035	2.48486e-06		0.577035	7.77217e-07		0.577035	8.82471e-07		0.577035	1.10263e-06
0.579929	2.20929e-05		0.579929	1.88322e-05		0.579929	2.50979e-06		0.579929	7.80893e-07		0.579929	8.83236e-07		0.579929	1.10213e-06
0.582823	2.04903e-05		0.582823	1.75772e-05		0.582823	2.53544e-06		0.582823	7.84827e-07		0.582823	8.84073e-07		0.582823	1.10168e-06
0.585717	1.90335e-05		0.585717	1.64063e-05		0.585717	2.56171e-06		0.585717	7.89012e-07		0.585717	8.85114e-07		0.585717	1.10126e-06
0.588611	1.76949e-05		0.588611	1.53143e-05		0.588611	2.58852e-06		0.588611	7.93428e-07		0.588611	8.8629e-07		0.588611	1.10084e-06
0.591505	1.64575e-05		0.591505	1.42997e-05		0.591505	2.61575e-06		0.591505	7.9805e-07		0.591505	8.87551e-07		0.591505	1.10037e-06
0.594399	1.53243e-05		0.594399	1.33605e-05		0.594399	2.64328e-06		0.594399	8.02857e-07		0.594399	8.8893e-07		0.594399	1.09984e-06
0.597293	1.42859e-05		0.597293	1.24874e-05		0.597293	2.67101e-06		0.597293	8.07826e-07		0.597293	8.90473e-07		0.597293	1.09919e-06
0.600186	1.33342e-05		0.600186	1.16753e-05		0.600186	2.69877e-06		0.600186	8.12937e-07		0.600186	8.92158e-07		0.600186	1.09841e-06
0.60308	1.246e-05		0.60308	1.09261e-05		0.60308	2.72643e-06		0.60308	8.18167e-07		0.60308	8.93969e-07		0.60308	1.0975e-06
0.605974	1.16513e-05		0.605974	1.02356e-05		0.605974	2.7538e-06		0.605974	8.23492e-07		0.605974	8.95891e-07		0.605974	1.09669e-06
0.608868	1.08958e-05		0.608868	9.59874e-06		0.608868	2.7807e-06		0.608868	8.28886e-07		0.608868	8.97911e-07		0.608868	1.09619e-06
0.611762	1.01865e-05		0.611762	9.01141e-06		0.611762	2.80693e-06		0.611762	8.34322e-07		0.611762	9.00017e-07		0.611762	1.09598e-06
0.614656	9.52151e-06		0.614656	8.46948e-06		0.614656	2.83224e-06		0.614656	8.39771e-07		0.614656	9.02196e-07		0.614656	1.09603e-06
0.61755	8.89985e-06		0.61755	7.96868e-06		0.61755	2.85638e-06		0.61755	8.45201e-07		0.61755	9.04434e-07		0.61755	1.0963e-06
0.620444	8.32119e-06		0.620444	7.50481e-06		0.620444	2.87902e-06		0.620444	8.50578e-07		0.620444	9.06714e-07		0.620444	1.0968e-06
0.623338	7.7849e-06		0.623338	7.07392e-06		0.623338	2.89981e-06		0.623338	8.55862e-07		0.623338	9.0902e-07		0.623338	1.09748e-06
0.626231	7.28808e-06		0.626231	6.66957e-06		0.626231	2.9199e-06		0.626231	8.6101e-07		0.626231	9.11331e-07		0.626231	1.09834e-06
0.629125	6.82799e-06		0.629125	6.28995e-06		0.629125	2.94069e-06		0.629125	8.65972e-07		0.629125	9.13626e-07		0.629125	1.09936e-06
0.632019	6.40295e-06		0.632019	5.93731e-06		0.632019	2.96225e-06		0.632019	8.70689e-07		0.632019	9.15883e-07		0.632019	1.10052e-06
0.634913	6.0125e-06		0.634913	5.61054e-06		0.634913	2.98455e-06		0.634913	8.75092e-07		0.634913	9.18082e-07		0.634913	1.10182e-06
0.637807	5.65193e-06		0.637807	5.30882e-06		0.637807	3.00758e-06		0.637807	8.79495e-07		0.637807	9.20211e-07		0.637807	1.10324e-06
0.640701	5.31928e-06		0.640701	5.03179e-06		0.640701	3.03129e-06		0.640701	8.84282e-07		0.640701	9.22265e-07		0.640701	1.10483e-06
0.643595	5.01714e-06		0.643595	4.78013e-06		0.643595	3.05552e-06		0.643595	8.89513e-07		0.643595	9.24565e-07		0.643595	1.10664e-06
0.643595	5.01714e-06		0.643595	4.78013e-06		0.643595	3.05552e-06		0.643595	8.89513e-07		0.643595	9.24565e-07		0.643595	1.10664e-06
0.646489	4.74051e-06		0.646489	4.54893e-06		0.646489	3.07999e-06		0.646489	8.9502e-07		0.646489	9.27213e-07		0.646489	1.1085e-06
0.649383	4.48087e-06		0.649383	4.33271e-06		0.649383	3.10466e-06		0.649383	9.00641e-07		0.649383	9.30013e-07		0.649383	1.11039e-06
0.652277	4.2352e-06		0.652277	4.13222e-06		0.652277	3.1296e-06		0.652277	9.06375e-07		0.652277	9.32958e-07		0.652277	1.11242e-06
0.65517	4.0059e-06		0.65517	3.94474e-06		0.65517	3.15473e-06		0.65517	9.12183e-07		0.65517	9.36e-07		0.65517	1.11453e-06
0.658064	3.7916e-06		0.658064	3.7669e-06		0.658064	3.18e-06		0.658064	9.18033e-07		0.658064	9.39095e-07		0.658064	1.11667e-06
0.660958	3.59006e-06		0.660958	3.59856e-06		0.660958	3.20537e-06		0.660958	9.23899e-07		0.660958	9.42208e-07		0.660958	1.11878e-06
0.663852	3.40278e-06		0.663852	3.44011e-06		0.663852	3.23081e-06		0.663852	9.29764e-07		0.663852	9.45315e-07		0.663852	1.12085e-06
0.666746	3.22988e-06		0.666746	3.29189e-06		0.666746	3.25622e-06		0.666746	9.35597e-07		0.666746	9.48383e-07		0.666746	1.12284e-06
0.66964	3.0686e-06		0.66964	3.1523e-06		0.66964	3.28148e-06		0.66964	9.41372e-07		0.66964	9.51385e-07		0.66964	1.12472e-06
0.672534	2.91778e-06		0.672534	3.02059e-06		0.672534	3.30649e-06		0.672534	9.47065e-07		0.672534	9.54297e-07		0.672534	1.12645e-06
0.675428	2.77667e-06		0.675428	2.89791e-06		0.675428	3.3311e-06		0.675428	9.52649e-07		0.675428	9.57097e-07		0.675428	1.128e-06
0.678322	2.64311e-06		0.678322	2.78446e-06		0.678322	3.35515e-06		0.678322	9.58095e-07		0.678322	9.59763e-07		0.678322	1.12932e-06
0.681215	2.51349e-06		0.681215	2.67976e-06		0.681215	3.37847e-06		0.681215	9.63365e-07		0.681215	9.62269e-07		0.681215	1.13037e-06
0.684109	2.38885e-06		0.684109	2.58229e-06		0.684109	3.40086e-06		0.684109	9.68414e-07		0.684109	9.6459e-07		0.684109	1.1311e-06
0.687003	2.27628e-06		0.687003	2.49094e-06		0.687003	3.42207e-06		0.687003	9.73193e-07		0.687003	9.66696e-07		0.687003	1.13141e-06
0.689897	2.18209e-06		0.689897	2.40534e-06		0.689897	3.44185e-06		0.689897	9.7764e-07		0.689897	9.68552e-07		0.689897	1.13122e-06
0.692791	2.0998e-06		0.692791	2.32467e-06		0.692791	3.45991e-06		0.692791	9.81686e-07		0.692791	9.70122e-07		0.692791	1.13077e-06
0.695685	2.02727e-06		0.695685	2.24906e-06		0.695685	3.47593e-06		0.695685	9.85243e-07		0.695685	9.71358e-07		0.695685	1.13039e-06
0.698579	1.96348e-06		0.698579	2.17534e-06		0.698579	3.48949e-06		0.698579	9.88197e-07		0.698579	9.72376e-07		0.698579	1.13006e-06
0.701473	1.90097e-06		0.701473	2.10509e-06		0.701473	3.50199e-06		0.701473	9.90836e-07		0.701473	9.73307e-07		0.701473	1.12975e-06
0.704367	1.84147e-06		0.704367	2.04838e-06		0.704367	3.51501e-06		0.704367	9.93503e-07		0.704367	9.74101e-07		0.704367	1.12942e-06
0.70726	1.78584e-06		0.70726	2.00587e-06		0.70726	3.52829e-06		0.70726	9.96132e-07		0.70726	9.74676e-07		0.70726	1.129e-06
0.710154	1.73458e-06		0.710154	1.97061e-06		0.710154	3.54133e-06		0.710154	9.98604e-07		0.710154	9.74918e-07		0.710154	1.1284e-06
0.713048	1.68837e-06		0.713048	1.93758e-06		0.713048	3.55343e-06		0.713048	1.00074e-06		0.713048	9.74651e-07		0.713048	1.12748e-06
0.715942	1.64701e-06		0.715942	1.90577e-06		0.715942	3.56335e-06		0.715942	1.00224e-06		0.715942	9.73573e-07		0.715942	1.126e-06
0.715942	1.64701e-06		0.715942	1.90577e-06		0.715942	3.56335e-06		0.715942	1.00224e-06		0.715942	9.73573e-07		0.715942	1.126e-06
0.718836	1.60939e-06		0.718836	1.87702e-06		0.718836	3.57206e-06		0.718836	1.00338e-06		0.718836	9.72018e-07		0.718836	1.12418e-06
0.72173	1.57474e-06		0.72173	1.85097e-06		0.72173	3.58108e-06		0.72173	1.00459e-06		0.72173	9.70467e-07		0.72173	1.12235e-06
0.724624	1.54285e-06		0.724624	1.82671e-06		0.724624	3.59015e-06		0.724624	1.00578e-06		0.724624	9.68873e-07		0.724624	1.12045e-06
0.727518	1.51341e-06		0.727518	1.80427e-06		0.727518	3.59927e-06		0.727518	1.00695e-06		0.727518	9.67246e-07		0.727518	1.11849e-06
0.730412	1.48604e-06		0.730412	1.78366e-06		0.730412	3.60846e-06		0.730412	1.00806e-06		0.730412	9.65593e-07		0.730412	1.11647e-06
0.733305	1.46077e-06		0.733305	1.76495e-06		0.733305	3.61773e-06		0.733305	1.00909e-06		0.733305	9.63917e-07		0.733305	1.11437e-06
0.736199	1.43767e-06		0.736199	1.74818e-06		0.736199	3.62705e-06		0.736199	1.01004e-06		0.736199	9.6222e-07		0.736199	1.11219e-06
0.739093	1.41681e-06		0.739093	1.73342e-06		0.739093	3.63639e-06		0.739093	1.01088e-06		0.739093	9.605e-07		0.739093	1.10989e-06
0.741987	1.39826e-06		0.741987	1.7205e-06		0.741987	3.64566e-06		0.741987	1.0116e-06		0.741987	9.58755e-07		0.741987	1.10741e-06
0.744881	1.38206e-06		0.744881	1.70914e-06		0.744881	3.65473e-06		0.744881	1.01217e-06		0.744881	9.56982e-07		0.744881	1.10468e-06
0.747775	1.36796e-06		0.747775	1.69926e-06		0.747775	3.66339e-06		0.747775	1.01257e-06		0.747775	9.55185e-07		0.747775	1.10168e-06
0.750669	1.35544e-06		0.750669	1.69085e-06		0.750669	3.67144e-06		0.750669	1.01276e-06		0.750669	9.53255e-07		0.750669	1.09836e-06
0.753563	1.34426e-06		0.753563	1.68389e-06		0.753563	3.67865e-06		0.753563	1.01271e-06		0.753563	9.51021e-07		0.753563	1.09469e-06
0.756457	1.33446e-06		0.756457	1.67833e-06		0.756457	3.68479e-06		0.756457	1.01238e-06		0.756457	9.48419e-07		0.756457	1.09063e-06
0.75935	1.32605e-06		0.75935	1.67414e-06		0.75935	3.68961e-06		0.75935	1.01173e-06		0.75935	9.45428e-07		0.75935	1.08614e-06
0.762244	1.31904e-06		0.762244	1.67126e-06		0.762244	3.69286e-06		0.762244	1.01075e-06		0.762244	9.42027e-07		0.762244	1.0812e-06
0.765138	1.31341e-06		0.765138	1.6696e-06		0.765138	3.69425e-06		0.765138	1.00926e-06		0.765138	9.38192e-07		0.765138	1.07576e-06
0.768032	1.30914e-06		0.768032	1.66906e-06		0.768032	3.69348e-06		0.768032	1.00712e-06		0.768032	9.33891e-07		0.768032	1.0698e-06
0.770926	1.30613e-06		0.770926	1.66952e-06		0.770926	3.69028e-06		0.770926	1.00426e-06		0.770926	9.29085e-07		0.770926	1.06328e-06
0.77382	1.30421e-06		0.77382	1.67078e-06		0.77382	3.68427e-06		0.77382	1.00061e-06		0.77382	9.23737e-07		0.77382	1.05618e-06
0.776714	1.30324e-06		0.776714	1.67264e-06		0.776714	3.67447e-06		0.776714	9.96129e-07		0.776714	9.17812e-07		0.776714	1.04847e-06
0.779608	1.3031e-06		0.779608	1.67482e-06		0.779608	3.66035e-06		0.779608	9.90726e-07		0.779608	9.11277e-07		0.779608	1.04002e-06
0.782502	1.30365e-06		0.782502	1.67703e-06		0.782502	3.64225e-06		0.782502	9.84335e-07		0.782502	9.0411e-07		0.782502	1.0307e-06
0.785396	1.3047e-06		0.785396	1.67894e-06		0.785396	3.62033e-06		0.785396	9.76903e-07		0.785396	8.96293e-07		0.785396	1.02049e-06
0.788289	1.30606e-06		0.788289	1.68025e-06		0.788289	3.59474e-06		0.788289	9.684e-07		0.788289	8.87819e-07		0.788289	1.00936e-06
0.791183	1.30749e-06		0.791183	1.68097e-06		0.791183	3.56569e-06		0.791183	9.58801e-07		0.791183	8.7868e-07		0.791183	9.97333e-07
0.794077	1.30877e-06		0.794077	1.68104e-06		0.794077	3.53316e-06		0.794077	9.4809e-07		0.794077	8.6867e-07		0.794077	9.8439e-07
0.796971	1.30965e-06		0.796971	1.68003e-06		0.796971	3.49659e-06		0.796971	9.36268e-07		0.796971	8.57589e-07		0.796971	9.70533e-07
0.799865	1.30976e-06		0.799865	1.67747e-06		0.799865	3.45469e-06		0.799865	9.23357e-07		0.799865	8.45429e-07		0.799865	9.55751e-07
0.799865	1.30976e-06		0.799865	1.67747e-06		0.799865	3.45469e-06		0.799865	9.23357e-07		0.799865	8.45429e-07		0.799865	9.55751e-07
0.802759	1.30861e-06		0.802759	1.67262e-06		0.802759	3.40538e-06		0.802759	9.09339e-07		0.802759	8.32149e-07		0.802759	9.39961e-07
0.805653	1.30581e-06		0.805653	1.66496e-06		0.805653	3.34825e-06		0.805653	8.94256e-07		0.805653	8.17761e-07		0.805653	9.23076e-07
0.808547	1.30117e-06		0.808547	1.65434e-06		0.808547	3.28546e-06		0.808547	8.77928e-07		0.808547	8.02337e-07		0.808547	9.05092e-07
0.811441	1.29448e-06		0.811441	1.64058e-06		0.811441	3.21989e-06		0.811441	8.6007e-07		0.811441	7.8593e-07		0.811441	8.86043e-07
0.814334	1.28555e-06		0.814334	1.62357e-06		0.814334	3.15363e-06		0.814334	8.40675e-07		0.814334	7.68596e-07		0.814334	8.65975e-07
0.817228	1.27432e-06		0.817228	1.60326e-06		0.817228	3.08542e-06		0.817228	8.19845e-07		0.817228	7.50406e-07		0.817228	8.44949e-07
0.820122	1.26082e-06		0.820122	1.57974e-06		0.820122	3.0111e-06		0.820122	7.97755e-07		0.820122	7.31243e-07		0.820122	8.2305e-07
0.823016	1.24501e-06		0.823016	1.5531e-06		0.823016	2.92464e-06		0.823016	7.74619e-07		0.823016	7.11004e-07		0.823016	8.00398e-07
0.82591	1.22689e-06		0.82591	1.52343e-06		0.82591	2.82515e-06		0.82591	7.5062e-07		0.82591	6.89817e-07		0.82591	7.76958e-07
0.828804	1.20648e-06		0.828804	1.49087e-06		0.828804	2.7225e-06		0.828804	7.25876e-07		0.828804	6.67852e-07		0.828804	7.5269e-07
0.831698	1.18373e-06		0.831698	1.45564e-06		0.831698	2.63209e-06		0.831698	7.00551e-07		0.831698	6.4532e-07		0.831698	7.27769e-07
0.834592	1.15876e-06		0.834592	1.41797e-06		0.834592	2.5581e-06		0.834592	6.74873e-07		0.834592	6.22451e-07		0.834592	7.02427e-07
0.837486	1.13187e-06		0.837486	1.37814e-06		0.837486	2.4775e-06		0.837486	6.4923e-07		0.837486	5.99334e-07		0.837486	6.76942e-07
0.840379	1.10332e-06		0.840379	1.33651e-06		0.840379	2.36009e-06		0.840379	6.24042e-07		0.840379	5.75958e-07		0.840379	6.51513e-07
0.843273	1.07337e-06		0.843273	1.29353e-06		0.843273	2.20559e-06		0.843273	5.99033e-07		0.843273	5.52493e-07		0.843273	6.26256e-07
0.846167	1.04229e-06		0.846167	1.24964e-06		0.846167	2.06612e-06		0.846167	5.73864e-07		0.846167	5.29172e-07		0.846167	6.01294e-07
0.849061	1.01035e-06		0.849061	1.20526e-06		0.849061	1.98824e-06		0.849061	5.48836e-07		0.849061	5.06128e-07		0.849061	5.76758e-07
0.851955	9.7781e-07		0.851955	1.16075e-06		0.851955	1.94958e-06		0.851955	5.24333e-07		0.851955	4.83482e-07		0.851955	5.5278e-07
0.854849	9.4491e-07		0.854849	1.11642e-06		0.854849	1.89992e-06		0.854849	5.0053e-07		0.854849	4.6136e-07		0.854849	5.29498e-07
0.857743	9.11876e-07		0.857743	1.07258e-06		0.857743	1.81841e-06		0.857743	4.77486e-07		0.857743	4.39903e-07		0.857743	5.07052e-07
0.860637	8.78939e-07		0.860637	1.02953e-06		0.860637	1.72042e-06		0.860637	4.55415e-07		0.860637	4.19265e-07		0.860637	4.85591e-07
0.863531	8.46377e-07		0.863531	9.87626e-07		0.863531	1.62653e-06		0.863531	4.34661e-07		0.863531	3.99618e-07		0.863531	4.65287e-07
0.866424	8.14622e-07		0.866424	9.47466e-07		0.866424	1.54452e-06		0.866424	4.17125e-07		0.866424	3.8124e-07		0.866424	4.46336e-07
0.869318	7.84549e-07		0.869318	9.10101e-07		0.869318	1.47509e-06		0.869318	4.05897e-07		0.869318	3.64718e-07		0.869318	4.28988e-07
0.872212	7.58148e-07		0.872212	8.77605e-07		0.872212	1.41739e-06		0.872212	4.01086e-07		0.872212	3.50866e-07		0.872212	4.13735e-07
0.875106	7.40776e-07		0.875106	8.54297e-07		0.875106	1.37187e-06		0.875106	3.69058e-07		0.875106	3.40909e-07		0.875106	4.01749e-07
0.878	7.35351e-07		0.878	8.45722e-07		0.878	1.35251e-06		0.878	3.38215e-07		0.878	3.37159e-07		0.878	3.9685e-07

## Sheet: Radiation heat flux
SN 0			SN 0.2			SN 0.4			SN 0.6			SN 0.8			SN 1
Axial distance	Radiation heat flux W/m2		Axial distance	Radiation heat flux W/m2		Axial distance	Radiation heat flux W/m2		Axial distance	Radiation heat flux W/m2		Axial distance	Radiation heat flux W/m2		Axial distance	Radiation heat flux W/m2
0.00115113	9418.81		0.00115113	9821.41		0.00115113	18284		0.00115113	23674.6		0.00115113	28438.4		0.00115113	33389.9
0.00404502	9481.04		0.00404502	9892.04		0.00404502	18479.3		0.00404502	23741.3		0.00404502	28783.6		0.00404502	33643
0.00693891	9545.21		0.00693891	9966.95		0.00693891	18683.5		0.00693891	23834.9		0.00693891	29089.2		0.00693891	33833.8
0.0098328	9626.59		0.0098328	10055.8		0.0098328	18914.8		0.0098328	23989.4		0.0098328	29370.3		0.0098328	33983.1
0.0127267	9731.22		0.0127267	10163.8		0.0127267	19185.9		0.0127267	24232.8		0.0127267	29642.4		0.0127267	34109.6
0.0156206	9854.97		0.0156206	10288.5		0.0156206	19491.5		0.0156206	24559		0.0156206	29903.8		0.0156206	34288.7
0.0185145	9987.24		0.0185145	10417.8		0.0185145	19822.5		0.0185145	24951.9		0.0185145	30169.4		0.0185145	34609.6
0.0214084	10121.7		0.0214084	10545.4		0.0214084	20173.6		0.0214084	25399.9		0.0214084	30438.8		0.0214084	35093.5
0.0243023	10253.2		0.0243023	10666.2		0.0243023	20528.3		0.0243023	25874.5		0.0243023	30694.9		0.0243023	35713.4
0.0271961	10375.6		0.0271961	10777.4		0.0271961	20870.8		0.0271961	26338.8		0.0271961	30975.7		0.0271961	36409.9
0.03009	10486.6		0.03009	10880.2		0.03009	21191		0.03009	26759		0.03009	31336.3		0.03009	37104.5
0.0329839	10585.9		0.0329839	10975.8		0.0329839	21483.5		0.0329839	27112.6		0.0329839	31790.3		0.0329839	37722.9
0.0358778	10676.7		0.0358778	11065.8		0.0358778	21746		0.0358778	27396.2		0.0358778	32320		0.0358778	38222.3
0.0387717	10760.4		0.0387717	11152.6		0.0387717	21978.4		0.0387717	27630.2		0.0387717	32876.6		0.0387717	38607.9
0.0416656	10838.3		0.0416656	11239.4		0.0416656	22183.5		0.0416656	27840.5		0.0416656	33395.1		0.0416656	38914.4
0.0445595	10911.8		0.0445595	11329		0.0445595	22362.4		0.0445595	28040.9		0.0445595	33823.6		0.0445595	39095.9
0.0474534	10981.8		0.0474534	11420.9		0.0474534	22514.5		0.0474534	28282.2		0.0474534	34154.6		0.0474534	39191.4
0.0503473	11049.3		0.0503473	11512.7		0.0503473	22646.7		0.0503473	28621.7		0.0503473	34427.1		0.0503473	39335
0.0532412	11116.1		0.0532412	11602.9		0.0532412	22771.4		0.0532412	29058.3		0.0532412	34622.1		0.0532412	39547.2
0.056135	11184.5		0.056135	11692.4		0.056135	22899.7		0.056135	29555.4		0.056135	34776.1		0.056135	39819.6
0.0590289	11256.3		0.0590289	11781.5		0.0590289	23044.2		0.0590289	30058.9		0.0590289	35017.3		0.0590289	40072.9
0.0619228	11331.7		0.0619228	11869.9		0.0619228	23216		0.0619228	30530.3		0.0619228	35366.8		0.0619228	40207.3
0.0648167	11410.8		0.0648167	11957.2		0.0648167	23423.8		0.0648167	30988.1		0.0648167	35780.7		0.0648167	40298.8
0.0677106	11493.5		0.0677106	12043.2		0.0677106	23670.5		0.0677106	31499.7		0.0677106	36175.4		0.0677106	40440.9
0.0706045	11578.8		0.0706045	12128.4		0.0706045	23955.9		0.0706045	32030.6		0.0706045	36518.2		0.0706045	40638.9
0.0734984	11665.7		0.0734984	12213.7		0.0734984	24274.7		0.0734984	32591.6		0.0734984	36847		0.0734984	40907.9
0.0763923	11754		0.0763923	12299.3		0.0763923	24617.3		0.0763923	33110.6		0.0763923	37122.9		0.0763923	41256.3
0.0792862	11844.5		0.0792862	12385.6		0.0792862	24969.8		0.0792862	33310.9		0.0792862	37280.9		0.0792862	41689.8
0.0821801	11937.9		0.0821801	12472.8		0.0821801	25322.1		0.0821801	33258		0.0821801	37322.5		0.0821801	42183
0.085074	12034.1		0.085074	12560.7		0.085074	25682.8		0.085074	33143.3		0.085074	37286.3		0.085074	42616.5
0.085074	12034.1		0.085074	12560.7		0.085074	25682.8		0.085074	33143.3		0.085074	37286.3		0.085074	42616.5
0.0879678	12131.9		0.0879678	12649.3		0.0879678	26090.6		0.0879678	32976.7		0.0879678	37177.1		0.0879678	42895.3
0.0908617	12230.1		0.0908617	12739		0.0908617	26604.1		0.0908617	32780.2		0.0908617	37033.9		0.0908617	43016.2
0.0937556	12327.6		0.0937556	12830		0.0937556	27257.3		0.0937556	32581.6		0.0937556	36933.4		0.0937556	42993.8
0.0966495	12423.9		0.0966495	12922.5		0.0966495	27999		0.0966495	32385		0.0966495	36885.3		0.0966495	42904.7
0.0995434	12518.4		0.0995434	13017		0.0995434	28779.2		0.0995434	32183.8		0.0995434	36862.6		0.0995434	42831.4
0.102437	12610.7		0.102437	13113.4		0.102437	29586.8		0.102437	32005.4		0.102437	36851.3		0.102437	42782
0.105331	12700.9		0.105331	13211.5		0.105331	30345		0.105331	31882		0.105331	36846.3		0.105331	42742.1
0.108225	12788.8		0.108225	13311		0.108225	30958.3		0.108225	31808.8		0.108225	36841.5		0.108225	42703.7
0.111119	12874.2		0.111119	13411		0.111119	31350.8		0.111119	31761.9		0.111119	36832.5		0.111119	42664.1
0.114013	12957.1		0.114013	13510.7		0.114013	31468.3		0.114013	31725.4		0.114013	36816.1		0.114013	42620.7
0.116907	13037.7		0.116907	13609.2		0.116907	31412.3		0.116907	31696.3		0.116907	36789.6		0.116907	42572.9
0.119801	13115.8		0.119801	13705.8		0.119801	31255.2		0.119801	31672.9		0.119801	36749.4		0.119801	42516.2
0.122695	13191.8		0.122695	13799.8		0.122695	31017.8		0.122695	31653.5		0.122695	36700.8		0.122695	42451.3
0.125588	13265.6		0.125588	13890.9		0.125588	30769.5		0.125588	31634.9		0.125588	36646.3		0.125588	42381
0.128482	13337		0.128482	13978.8		0.128482	30510.6		0.128482	31614.2		0.128482	36588.6		0.128482	42306.6
0.131376	13406.2		0.131376	14063.7		0.131376	30239.7		0.131376	31588.6		0.131376	36533.9		0.131376	42234.1
0.13427	13473.3		0.13427	14145.8		0.13427	29955.6		0.13427	31555.5		0.13427	36481.8		0.13427	42165.6
0.137164	13538.3		0.137164	14225.2		0.137164	29648.5		0.137164	31516.3		0.137164	36431.3		0.137164	42100.6
0.140058	13601.3		0.140058	14302.1		0.140058	29334		0.140058	31472.3		0.140058	36382.8		0.140058	42035.6
0.142952	13662.2		0.142952	14376.9		0.142952	29042.1		0.142952	31423.1		0.142952	36334.6		0.142952	41968.3
0.145846	13721.1		0.145846	14450		0.145846	28781.1		0.145846	31367.8		0.145846	36285.4		0.145846	41899.3
0.14874	13778		0.14874	14521.6		0.14874	28549.7		0.14874	31307.1		0.14874	36236.4		0.14874	41828.7
0.151633	13833		0.151633	14592		0.151633	28347.3		0.151633	31241.7		0.151633	36187.5		0.151633	41757
0.154527	13886.3		0.154527	14661.5		0.154527	28174.5		0.154527	31175.7		0.154527	36139.3		0.154527	41684.8
0.157421	13937.7		0.157421	14730.3		0.157421	28024.3		0.157421	31113.6		0.157421	36091.9		0.157421	41612.5
0.160315	13987.5		0.160315	14798.7		0.160315	27886.6		0.160315	31054.5		0.160315	36046.1		0.160315	41540.7
0.163209	14035.8		0.163209	14867.3		0.163209	27760.4		0.163209	30999.7		0.163209	36001.9		0.163209	41469.8
0.166103	14082.9		0.166103	14936.4		0.166103	27648.6		0.166103	30951		0.166103	35959.4		0.166103	41399.9
0.166103	14082.9		0.166103	14936.4		0.166103	27648.6		0.166103	30951		0.166103	35959.4		0.166103	41399.9
0.168997	14129.1		0.168997	15006.4		0.168997	27550.7		0.168997	30907.8		0.168997	35918.4		0.168997	41330.8
0.171891	14174.7		0.171891	15077.8		0.171891	27466.6		0.171891	30870.3		0.171891	35878.7		0.171891	41262.6
0.174785	14219.8		0.174785	15150.6		0.174785	27395		0.174785	30837.7		0.174785	35840.1		0.174785	41195
0.177678	14264.6		0.177678	15225.1		0.177678	27332.7		0.177678	30809.5		0.177678	35802.3		0.177678	41128
0.180572	14309.1		0.180572	15301.5		0.180572	27276.1		0.180572	30785.2		0.180572	35765		0.180572	41061.4
0.183466	14353.5		0.183466	15379.8		0.183466	27222.6		0.183466	30764		0.183466	35727.9		0.183466	40995.2
0.18636	14398.1		0.18636	15460		0.18636	27169.6		0.18636	30745.5		0.18636	35690.6		0.18636	40929
0.189254	14442.9		0.189254	15542.2		0.189254	27115.5		0.189254	30728.8		0.189254	35652.9		0.189254	40863
0.192148	14488.2		0.192148	15626.3		0.192148	27059.1		0.192148	30714		0.192148	35614.7		0.192148	40797.6
0.195042	14534.2		0.195042	15712.2		0.195042	27000		0.195042	30700.6		0.195042	35576.2		0.195042	40732.2
0.197936	14581		0.197936	15799.9		0.197936	26938.8		0.197936	30687.8		0.197936	35537.1		0.197936	40665.3
0.20083	14628.9		0.20083	15889.3		0.20083	26876		0.20083	30675.1		0.20083	35496.3		0.20083	40596.6
0.203723	14678.1		0.203723	15980.4		0.203723	26814.3		0.203723	30662.1		0.203723	35453.2		0.203723	40527.2
0.206617	14728.5		0.206617	16073.2		0.206617	26754.9		0.206617	30648.6		0.206617	35408.1		0.206617	40457.8
0.209511	14780.3		0.209511	16167.8		0.209511	26697.4		0.209511	30633.5		0.209511	35362		0.209511	40388.2
0.212405	14833.8		0.212405	16264		0.212405	26644.5		0.212405	30615.3		0.212405	35315.6		0.212405	40318.1
0.215299	14889.2		0.215299	16362		0.215299	26598.4		0.215299	30593.9		0.215299	35269.2		0.215299	40247.7
0.215299	14889.2		0.215299	16362		0.215299	26598.4		0.215299	30593.9		0.215299	35269.2		0.215299	40247.7
0.218193	14946.3		0.218193	16461.6		0.218193	26560.4		0.218193	30569.7		0.218193	35222.6		0.218193	40177.2
0.221087	15005.4		0.221087	16562.9		0.221087	26530.6		0.221087	30543.6		0.221087	35175.1		0.221087	40106.2
0.223981	15066.7		0.223981	16666.5		0.223981	26508.8		0.223981	30515.8		0.223981	35126.5		0.223981	40034.3
0.226875	15130.3		0.226875	16772.3		0.226875	26494.5		0.226875	30486.5		0.226875	35075.7		0.226875	39961.4
0.229768	15196.1		0.229768	16880.1		0.229768	26486.7		0.229768	30455.6		0.229768	35023.3		0.229768	39887.3
0.232662	15263.9		0.232662	16989.9		0.232662	26484.1		0.232662	30423.5		0.232662	34970.2		0.232662	39812.2
0.235556	15334.2		0.235556	17101.9		0.235556	26485.2		0.235556	30390.3		0.235556	34916.5		0.235556	39736.4
0.23845	15407		0.23845	17216.2		0.23845	26488.7		0.23845	30355.9		0.23845	34861.8		0.23845	39659.7
0.241344	15482.2		0.241344	17332.7		0.241344	26493.5		0.241344	30320.2		0.241344	34806.1		0.241344	39582.2
0.244238	15559.8		0.244238	17451.5		0.244238	26497.9		0.244238	30283.3		0.244238	34749.6		0.244238	39503.9
0.247132	15639.7		0.247132	17572.9		0.247132	26501		0.247132	30245.3		0.247132	34692.1		0.247132	39424.6
0.250026	15721.9		0.250026	17696.7		0.250026	26502.4		0.250026	30205.8		0.250026	34633.8		0.250026	39344.4
0.25292	15806.3		0.25292	17823.1		0.25292	26502.2		0.25292	30165		0.25292	34574.6		0.25292	39263.1
0.255814	15892.9		0.255814	17952.1		0.255814	26499.7		0.255814	30123.4		0.255814	34514.6		0.255814	39180.8
0.258707	15981.6		0.258707	18083.9		0.258707	26494.4		0.258707	30081		0.258707	34453.7		0.258707	39097.4
0.261601	16072.4		0.261601	18218.7		0.261601	26485.7		0.261601	30037.6		0.261601	34391.9		0.261601	39012.9
0.264495	16165.2		0.264495	18356.4		0.264495	26473.3		0.264495	29993.2		0.264495	34329.2		0.264495	38927.3
0.267389	16260		0.267389	18497.2		0.267389	26456.8		0.267389	29947.8		0.267389	34265.5		0.267389	38840.5
0.270283	16356.7		0.270283	18641		0.270283	26436.4		0.270283	29901.6		0.270283	34200.9		0.270283	38752.5
0.273177	16455.3		0.273177	18788		0.273177	26412.4		0.273177	29854.7		0.273177	34135.4		0.273177	38663.2
0.276071	16555.7		0.276071	18938.3		0.276071	26385.3		0.276071	29807.1		0.276071	34069		0.276071	38572.8
0.278965	16658		0.278965	19092		0.278965	26355.6		0.278965	29758.8		0.278965	34001.5		0.278965	38481.2
0.281859	16762.2		0.281859	19249.1		0.281859	26323.7		0.281859	29709.9		0.281859	33933		0.281859	38388.4
0.284752	16868.3		0.284752	19409.5		0.284752	26290		0.284752	29660.3		0.284752	33863.4		0.284752	38294.2
0.287646	16976.2		0.287646	19573.6		0.287646	26254.6		0.287646	29610.2		0.287646	33792.6		0.287646	38198.6
0.29054	17086.1		0.29054	19741.3		0.29054	26217.8		0.29054	29559.4		0.29054	33720.7		0.29054	38101.6
0.293434	17198		0.293434	19912.6		0.293434	26179.5		0.293434	29507.9		0.293434	33647.6		0.293434	38002.9
0.296328	17312		0.296328	20087.7		0.296328	26140.2		0.296328	29455.8		0.296328	33573.4		0.296328	37902.7
0.299222	17428.1		0.299222	20266.4		0.299222	26099.8		0.299222	29403		0.299222	33498		0.299222	37800.9
0.302116	17546.3		0.302116	20448.7		0.302116	26058.5		0.302116	29349.5		0.302116	33421.4		0.302116	37697.6
0.30501	17666.7		0.30501	20634.4		0.30501	26016.4		0.30501	29295.2		0.30501	33343.7		0.30501	37592.8
0.307904	17789.2		0.307904	20823.3		0.307904	25973.7		0.307904	29240.2		0.307904	33264.8		0.307904	37486.5
0.310797	17914		0.310797	21015.5		0.310797	25930.7		0.310797	29184.3		0.310797	33184.7		0.310797	37378.8
0.313691	18041.1		0.313691	21211		0.313691	25887.2		0.313691	29127.5		0.313691	33103.4		0.313691	37269.6
0.313691	18041.1		0.313691	21211		0.313691	25887.2		0.313691	29127.5		0.313691	33103.4		0.313691	37269.6
0.316585	18170.6		0.316585	21409.6		0.316585	25843.1		0.316585	29069.6		0.316585	33020.7		0.316585	37159
0.319479	18302.7		0.319479	21611.4		0.319479	25798.6		0.319479	29010.8		0.319479	32936.8		0.319479	37047.2
0.322373	18437.2		0.322373	21816.3		0.322373	25753.8		0.322373	28950.9		0.322373	32851.9		0.322373	36934.4
0.325267	18574.3		0.325267	22024.2		0.325267	25708.8		0.325267	28890.1		0.325267	32765.9		0.325267	36820.7
0.328161	18714.1		0.328161	22235.2		0.328161	25663.4		0.328161	28828.3		0.328161	32679		0.328161	36705.9
0.331055	18856.7		0.331055	22449.3		0.331055	25617.9		0.331055	28765.4		0.331055	32591		0.331055	36590.1
0.333949	19002.1		0.333949	22666.7		0.333949	25572.1		0.333949	28701.4		0.333949	32502.2		0.333949	36473.7
0.336842	19150.2		0.336842	22887.3		0.336842	25526.1		0.336842	28636.4		0.336842	32412.5		0.336842	36357
0.339736	19301.1		0.339736	23111.4		0.339736	25480		0.339736	28570.4		0.339736	32322.1		0.339736	36239.9
0.34263	19454.6		0.34263	23338.7		0.34263	25433.7		0.34263	28503.5		0.34263	32231.1		0.34263	36122.3
0.345524	19610.6		0.345524	23568.5		0.345524	25387.2		0.345524	28435.7		0.345524	32139.4		0.345524	36004.4
0.348418	19769.2		0.348418	23800.4		0.348418	25340.6		0.348418	28367		0.348418	32047		0.348418	35886.4
0.351312	19930.3		0.351312	24034		0.351312	25293.7		0.351312	28297.6		0.351312	31954.2		0.351312	35768.4
0.354206	20094		0.354206	24269.1		0.354206	25246.5		0.354206	28227.6		0.354206	31861.2		0.354206	35650.3
0.3571	20260.2		0.3571	24505.5		0.3571	25198.9		0.3571	28156.8		0.3571	31767.7		0.3571	35532.4
0.359994	20428.9		0.359994	24742.6		0.359994	25151		0.359994	28085.5		0.359994	31674		0.359994	35414.6
0.362887	20600.2		0.362887	24979.7		0.362887	25102.7		0.362887	28013.8		0.362887	31580.1		0.362887	35297.1
0.365781	20774		0.365781	25216.1		0.365781	25053.8		0.365781	27941.7		0.365781	31486.3		0.365781	35180
0.368675	20950.6		0.368675	25450.7		0.368675	25004.5		0.368675	27869.3		0.368675	31392.4		0.368675	35063.3
0.371569	21129.9		0.371569	25682.8		0.371569	24954.5		0.371569	27796.2		0.371569	31298.6		0.371569	34946.8
0.374463	21311.9		0.374463	25911.3		0.374463	24903.7		0.374463	27722.8		0.374463	31204.7		0.374463	34830.5
0.377357	21496.1		0.377357	26135.4		0.377357	24852.2		0.377357	27649.2		0.377357	31110.9		0.377357	34714.5
0.380251	21682.8		0.380251	26354.5		0.380251	24800.1		0.380251	27575.4		0.380251	31017.4		0.380251	34598.9
0.383145	21871.4		0.383145	26567.1		0.383145	24747.2		0.383145	27501.4		0.383145	30924.2		0.383145	34483.8
0.386039	22061.4		0.386039	26771.4		0.386039	24693.6		0.386039	27427.3		0.386039	30831.3		0.386039	34368.9
0.388932	22252.3		0.388932	26965.9		0.388932	24639.3		0.388932	27353.1		0.388932	30738.6		0.388932	34254.4
0.391826	22443.6		0.391826	27148.5		0.391826	24584.2		0.391826	27278.8		0.391826	30646.2		0.391826	34140.2
0.39472	22634.9		0.39472	27316.9		0.39472	24528.4		0.39472	27204.6		0.39472	30554		0.39472	34026.3
0.397614	22825.2		0.397614	27469.2		0.397614	24471.9		0.397614	27130.4		0.397614	30462.1		0.397614	33912.6
0.400508	23013.7		0.400508	27602.2		0.400508	24414.7		0.400508	27056.3		0.400508	30370.5		0.400508	33799.3
0.403402	23199.4		0.403402	27712.6		0.403402	24357		0.403402	26982.3		0.403402	30279.1		0.403402	33686.2
0.403402	23199.4		0.403402	27712.6		0.403402	24357		0.403402	26982.3		0.403402	30279.1		0.403402	33686.2
0.406296	23381		0.406296	27798.9		0.406296	24298.7		0.406296	26908.4		0.406296	30188.1		0.406296	33573.5
0.40919	23557		0.40919	27855.3		0.40919	24239.9		0.40919	26834.7		0.40919	30097.3		0.40919	33460.9
0.412084	23725.7		0.412084	27885.6		0.412084	24180.6		0.412084	26761.2		0.412084	30006.7		0.412084	33348.7
0.414977	23884.9		0.414977	27889		0.414977	24121		0.414977	26687.8		0.414977	29916.4		0.414977	33236.7
0.417871	24033		0.417871	27863.8		0.417871	24061.1		0.417871	26614.6		0.417871	29826.3		0.417871	33125
0.420765	24167.3		0.420765	27818.7		0.420765	24000.9		0.420765	26541.7		0.420765	29736.4		0.420765	33013.6
0.423659	24284.5		0.423659	27754.6		0.423659	23940.2		0.423659	26468.9		0.423659	29646.7		0.423659	32902.4
0.426553	24382.7		0.426553	27668.5		0.426553	23879.4		0.426553	26396.3		0.426553	29557.3		0.426553	32791.6
0.429447	24456.8		0.429447	27565.5		0.429447	23818.4		0.429447	26323.9		0.429447	29468		0.429447	32681.2
0.432341	24508.4		0.432341	27445.2		0.432341	23757.2		0.432341	26251.8		0.432341	29378.9		0.432341	32571.1
0.435235	24536.7		0.435235	27309.4		0.435235	23695.8		0.435235	26179.8		0.435235	29290		0.435235	32461.5
0.438129	24542.3		0.438129	27162		0.438129	23634.3		0.438129	26108		0.438129	29201.3		0.438129	32352.2
0.441023	24530.4		0.441023	27003.9		0.441023	23572.7		0.441023	26036.5		0.441023	29112.7		0.441023	32243.3
0.443916	24501.9		0.443916	26836.8		0.443916	23511		0.443916	25965.1		0.443916	29024.4		0.443916	32135
0.44681	24460.6		0.44681	26661.8		0.44681	23449.3		0.44681	25894		0.44681	28936.3		0.44681	32027.1
0.449704	24400.5		0.449704	26483.4		0.449704	23387.7		0.449704	25823.1		0.449704	28848.6		0.449704	31919.9
0.452598	24328.3		0.452598	26299.8		0.452598	23326.2		0.452598	25752.4		0.452598	28761.2		0.452598	31813.2
0.455492	24242.7		0.455492	26115.1		0.455492	23264.8		0.455492	25682		0.455492	28674.1		0.455492	31707.2
0.458386	24146.8		0.458386	25930		0.458386	23203.5		0.458386	25611.8		0.458386	28587.3		0.458386	31601.7
0.46128	24043.4		0.46128	25743.1		0.46128	23142.3		0.46128	25541.7		0.46128	28500.8		0.46128	31496.7
0.464174	23931.5		0.464174	25560.9		0.464174	23081.2		0.464174	25471.8		0.464174	28414.6		0.464174	31392.3
0.467068	23815.4		0.467068	25378.2		0.467068	23020.3		0.467068	25402.2		0.467068	28328.9		0.467068	31288.6
0.469961	23695.1		0.469961	25198.5		0.469961	22959.7		0.469961	25332.9		0.469961	28243.8		0.469961	31185.7
0.472855	23571.8		0.472855	25025.4		0.472855	22899.3		0.472855	25263.9		0.472855	28159.1		0.472855	31083.5
0.475749	23445.2		0.475749	24852.2		0.475749	22839.1		0.475749	25195.2		0.475749	28074.8		0.475749	30981.9
0.478643	23319.1		0.478643	24686.8		0.478643	22779.1		0.478643	25126.7		0.478643	27991.1		0.478643	30881
0.481537	23191.6		0.481537	24525.6		0.481537	22719.3		0.481537	25058.5		0.481537	27907.8		0.481537	30780.8
0.484431	23067.6		0.484431	24367.6		0.484431	22659.7		0.484431	24990.6		0.484431	27825.1		0.484431	30681.4
0.487325	22943.1		0.487325	24219.2		0.487325	22600.4		0.487325	24923		0.487325	27742.9		0.487325	30582.7
0.490219	22820.9		0.490219	24072.7		0.490219	22541.3		0.490219	24855.8		0.490219	27661.3		0.490219	30484.7
0.493113	22703.9		0.493113	23932.5		0.493113	22482.5		0.493113	24789		0.493113	27580.3		0.493113	30387.5
0.496006	22586.9		0.496006	23800.8		0.496006	22423.8		0.496006	24722.5		0.496006	27499.8		0.496006	30291
0.4989	22475.7		0.4989	23670.8		0.4989	22365.4		0.4989	24656.3		0.4989	27419.9		0.4989	30195.1
0.501794	22368.7		0.501794	23549.7		0.501794	22307.2		0.501794	24590.5		0.501794	27340.4		0.501794	30099.9
0.504688	22263.2		0.504688	23433.4		0.504688	22249.2		0.504688	24525.1		0.504688	27261.6		0.504688	30005.3
0.507582	22165.1		0.507582	23320.5		0.507582	22191.5		0.507582	24460.1		0.507582	27183.2		0.507582	29911.4
0.510476	22069.5		0.510476	23216.6		0.510476	22134		0.510476	24395.5		0.510476	27105.5		0.510476	29818.2
0.51337	21977		0.51337	23115.5		0.51337	22076.7		0.51337	24331.4		0.51337	27028.3		0.51337	29725.6
0.516264	21891.9		0.516264	23019		0.516264	22019.5		0.516264	24267.6		0.516264	26951.6		0.516264	29633.4
0.519158	21808.1		0.519158	22929.6		0.519158	21962.4		0.519158	24204		0.519158	26875.1		0.519158	29541.6
0.522051	21728.7		0.522051	22842.9		0.522051	21905.4		0.522051	24140.7		0.522051	26799.1		0.522051	29450.1
0.524945	21655.7		0.524945	22761		0.524945	21848.7		0.524945	24077.9		0.524945	26723.5		0.524945	29359.2
0.524945	21655.7		0.524945	22761		0.524945	21848.7		0.524945	24077.9		0.524945	26723.5		0.524945	29359.2
0.527839	21584.6		0.527839	22683.9		0.527839	21792.1		0.527839	24015.4		0.527839	26648.4		0.527839	29268.6
0.530733	21517.8		0.530733	22609.8		0.530733	21735.7		0.530733	23953.2		0.530733	26573.6		0.530733	29178.4
0.533627	21455.7		0.533627	22539.5		0.533627	21679.4		0.533627	23891.3		0.533627	26499		0.533627	29088.5
0.536521	21396.1		0.536521	22473.1		0.536521	21623.3		0.536521	23829.6		0.536521	26424.8		0.536521	28998.9
0.539415	21340		0.539415	22409.6		0.539415	21567.3		0.539415	23768.2		0.539415	26350.7		0.539415	28909.5
0.542309	21287.6		0.542309	22349.8		0.542309	21511.4		0.542309	23707		0.542309	26276.9		0.542309	28820.4
0.545203	21237.8		0.545203	22292.3		0.545203	21455.6		0.545203	23646		0.545203	26203.3		0.545203	28731.4
0.548096	21190.9		0.548096	22238.3		0.548096	21399.9		0.548096	23585.2		0.548096	26129.9		0.548096	28642.7
0.55099	21147		0.55099	22186.1		0.55099	21344.3		0.55099	23524.6		0.55099	26056.5		0.55099	28554.2
0.553884	21105.6		0.553884	22137		0.553884	21288.8		0.553884	23464		0.553884	25983.3		0.553884	28465.9
0.556778	21066.8		0.556778	22090.2		0.556778	21233.3		0.556778	23403.6		0.556778	25910.2		0.556778	28377.7
0.559672	21030.5		0.559672	22044.9		0.559672	21177.9		0.559672	23343.3		0.559672	25837.2		0.559672	28289.6
0.562566	20996.4		0.562566	22002.3		0.562566	21122.5		0.562566	23283		0.562566	25764.2		0.562566	28201.7
0.56546	20964.3		0.56546	21961		0.56546	21067.2		0.56546	23222.8		0.56546	25691.3		0.56546	28113.8
0.568354	20934		0.568354	21921.8		0.568354	21011.9		0.568354	23162.6		0.568354	25618.4		0.568354	28026.1
0.571248	20905.3		0.571248	21883.9		0.571248	20956.7		0.571248	23102.4		0.571248	25545.5		0.571248	27938.6
0.574142	20878.1		0.574142	21847.8		0.574142	20901.4		0.574142	23042.3		0.574142	25472.7		0.574142	27851.1
0.577035	20852.6		0.577035	21812.8		0.577035	20846.3		0.577035	22982.1		0.577035	25399.8		0.577035	27763.7
0.579929	20828		0.579929	21779		0.579929	20791.1		0.579929	22921.9		0.579929	25327		0.579929	27676.4
0.582823	20804.8		0.582823	21746.3		0.582823	20736		0.582823	22861.7		0.582823	25254.1		0.582823	27589.2
0.585717	20782.7		0.585717	21714.4		0.585717	20681		0.585717	22801.5		0.585717	25181.3		0.585717	27502
0.588611	20761.3		0.588611	21683.4		0.588611	20626		0.588611	22741.2		0.588611	25108.4		0.588611	27414.9
0.591505	20741.2		0.591505	21653.2		0.591505	20571.1		0.591505	22681		0.591505	25035.6		0.591505	27328
0.594399	20722		0.594399	21623.8		0.594399	20516.3		0.594399	22620.8		0.594399	24962.8		0.594399	27241.1
0.597293	20703.6		0.597293	21595.1		0.597293	20461.6		0.597293	22560.6		0.597293	24890.1		0.597293	27154.4
0.600186	20686.2		0.600186	21567		0.600186	20407.1		0.600186	22500.5		0.600186	24817.5		0.600186	27067.8
0.60308	20669.3		0.60308	21539.4		0.60308	20352.8		0.60308	22440.5		0.60308	24745		0.60308	26981.3
0.605974	20653.1		0.605974	21512.4		0.605974	20298.6		0.605974	22380.5		0.605974	24672.5		0.605974	26894.8
0.608868	20637.7		0.608868	21485.9		0.608868	20244.7		0.608868	22320.6		0.608868	24600.1		0.608868	26808.4
0.611762	20623.1		0.611762	21460.2		0.611762	20191.1		0.611762	22261		0.611762	24527.9		0.611762	26722.3
0.614656	20609.3		0.614656	21435.2		0.614656	20137.9		0.614656	22201.6		0.614656	24456		0.614656	26636.5
0.61755	20596.5		0.61755	21410.8		0.61755	20085.1		0.61755	22142.6		0.61755	24384.5		0.61755	26550.9
0.620444	20584.5		0.620444	21387.4		0.620444	20032.7		0.620444	22083.8		0.620444	24313.2		0.620444	26465.6
0.623338	20573.5		0.623338	21364.9		0.623338	19980.8		0.623338	22025.4		0.623338	24242.2		0.623338	26380.7
0.626231	20563.4		0.626231	21343.3		0.626231	19929.5		0.626231	21967.4		0.626231	24171.5		0.626231	26296
0.629125	20554.2		0.629125	21322.8		0.629125	19878.8		0.629125	21910		0.629125	24101.4		0.629125	26211.8
0.632019	20546.1		0.632019	21303.4		0.632019	19829		0.632019	21853.2		0.632019	24031.8		0.632019	26128.2
0.634913	20539.1		0.634913	21285.1		0.634913	19780		0.634913	21797.1		0.634913	23963		0.634913	26045.2
0.637807	20533.4		0.637807	21268		0.637807	19732.2		0.637807	21742		0.637807	23895		0.637807	25963
0.640701	20529.3		0.640701	21252.4		0.640701	19685.5		0.640701	21688		0.640701	23828		0.640701	25881.8
0.643595	20526.9		0.643595	21238.4		0.643595	19640.3		0.643595	21635.2		0.643595	23762.3		0.643595	25801.7
0.643595	20526.9		0.643595	21238.4		0.643595	19640.3		0.643595	21635.2		0.643595	23762.3		0.643595	25801.7
0.646489	20526.3		0.646489	21226.2		0.646489	19596.5		0.646489	21583.8		0.646489	23697.9		0.646489	25723
0.649383	20527.7		0.649383	21216		0.649383	19554.4		0.649383	21533.9		0.649383	23635		0.649383	25645.7
0.652277	20531.1		0.652277	21208		0.652277	19514		0.652277	21485.8		0.652277	23573.8		0.652277	25569.9
0.65517	20536.6		0.65517	21202.3		0.65517	19475.5		0.65517	21439.4		0.65517	23514.4		0.65517	25495.9
0.658064	20544.2		0.658064	21198.8		0.658064	19439		0.658064	21394.8		0.658064	23456.8		0.658064	25423.7
0.660958	20553.9		0.660958	21197.5		0.660958	19404.2		0.660958	21352.1		0.660958	23401.1		0.660958	25353.3
0.663852	20565.4		0.663852	21198.2		0.663852	19371.1		0.663852	21311.1		0.663852	23347.2		0.663852	25284.8
0.666746	20579.1		0.666746	21201.2		0.666746	19339.7		0.666746	21271.9		0.666746	23295.2		0.666746	25218.1
0.66964	20594.7		0.66964	21206.1		0.66964	19309.9		0.66964	21234.5		0.66964	23245.1		0.66964	25153.4
0.672534	20612.3		0.672534	21213.2		0.672534	19281.8		0.672534	21198.8		0.672534	23196.8		0.672534	25090.8
0.675428	20631.6		0.675428	21222		0.675428	19255.6		0.675428	21164.7		0.675428	23150.4		0.675428	25030.1
0.678322	20652.2		0.678322	21232.3		0.678322	19232.5		0.678322	21132.7		0.678322	23105.6		0.678322	24971.5
0.681215	20674.5		0.681215	21244.5		0.681215	19210.5		0.681215	21104		0.681215	23062.9		0.681215	24914.8
0.684109	20698.6		0.684109	21258.6		0.684109	19191.4		0.684109	21076.5		0.684109	23024		0.684109	24860.8
0.687003	20725.4		0.687003	21275.8		0.687003	19173.6		0.687003	21052		0.687003	22986.5		0.687003	24810.8
0.689897	20752.7		0.689897	21293.7		0.689897	19157.9		0.689897	21028.9		0.689897	22952.3		0.689897	24762.8
0.692791	20782.9		0.692791	21314.7		0.692791	19143.9		0.692791	21008.3		0.692791	22919.8		0.692791	24719.3
0.695685	20813.1		0.695685	21335.9		0.695685	19131.8		0.695685	20989.3		0.695685	22890.3		0.695685	24677.8
0.698579	20844.9		0.698579	21358.8		0.698579	19121.2		0.698579	20972.6		0.698579	22862.7		0.698579	24640.1
0.701473	20877.2		0.701473	21382.4		0.701473	19112.4		0.701473	20957.4		0.701473	22837.9		0.701473	24605.1
0.704367	20910.4		0.704367	21407.2		0.704367	19104.8		0.704367	20944.1		0.704367	22815		0.704367	24573.6
0.70726	20944		0.70726	21432.3		0.70726	19098.6		0.70726	20932.1		0.70726	22794.6		0.70726	24544.6
0.710154	20977.3		0.710154	21457.5		0.710154	19093.1		0.710154	20921.4		0.710154	22775.8		0.710154	24518.5
0.713048	21010.7		0.713048	21482.7		0.713048	19088.4		0.713048	20911.6		0.713048	22758.8		0.713048	24494.4
0.715942	21043		0.715942	21506.7		0.715942	19083.8		0.715942	20902.4		0.715942	22743		0.715942	24472
0.715942	21043		0.715942	21506.7		0.715942	19083.8		0.715942	20902.4		0.715942	22743		0.715942	24472
0.718836	21074.8		0.718836	21530.3		0.718836	19079.2		0.718836	20893.5		0.718836	22727.8		0.718836	24450.8
0.72173	21104.8		0.72173	21552		0.72173	19074.1		0.72173	20884		0.72173	22713.1		0.72173	24429.7
0.724624	21133.1		0.724624	21572.2		0.724624	19067.8		0.724624	20874.1		0.724624	22697.6		0.724624	24408.5
0.727518	21158		0.727518	21588.6		0.727518	19060.3		0.727518	20862.4		0.727518	22681.6		0.727518	24385.5
0.730412	21180.6		0.730412	21603.2		0.730412	19050.3		0.730412	20849.2		0.730412	22663		0.730412	24361
0.733305	21199.1		0.733305	21613.8		0.733305	19038.3		0.733305	20832.8		0.733305	22642.5		0.733305	24332.4
0.736199	21213.7		0.736199	21620.2		0.736199	19022.6		0.736199	20813.8		0.736199	22617.7		0.736199	24300.5
0.739093	21223.4		0.739093	21621.8		0.739093	19003.9		0.739093	20790.4		0.739093	22589.5		0.739093	24262.7
0.741987	21227.8		0.741987	21618.1		0.741987	18980.5		0.741987	20763.4		0.741987	22555.1		0.741987	24219.7
0.744881	21226.5		0.744881	21608.8		0.744881	18954		0.744881	20730.3		0.744881	22516.5		0.744881	24168.5
0.747775	21219.2		0.747775	21593.9		0.747775	18922		0.747775	20693.7		0.747775	22471.2		0.747775	24111.7
0.750669	21205.8		0.750669	21573.3		0.750669	18886.2		0.750669	20651.8		0.750669	22419.9		0.750669	24047.3
0.753563	21187.1		0.753563	21547.6		0.753563	18846.7		0.753563	20604.6		0.753563	22362.9		0.753563	23975
0.756457	21163		0.756457	21516.8		0.756457	18803		0.756457	20553.7		0.756457	22299.9		0.756457	23896.9
0.75935	21134.6		0.75935	21482		0.75935	18757.4		0.75935	20499.2		0.75935	22232.5		0.75935	23813.3
0.762244	21102.7		0.762244	21443.9		0.762244	18710.3		0.762244	20442.5		0.762244	22161.7		0.762244	23726.4
0.765138	21068.8		0.765138	21403.8		0.765138	18663		0.765138	20384.9		0.765138	22088.8		0.765138	23637.7
0.768032	21034.6		0.768032	21364.1		0.768032	18616.6		0.768032	20327.7		0.768032	22015.3		0.768032	23549.5
0.770926	21002.3		0.770926	21326.1		0.770926	18572.7		0.770926	20272		0.770926	21942.9		0.770926	23464.1
0.77382	20975.4		0.77382	21292.9		0.77382	18532.8		0.77382	20220.4		0.77382	21874.6		0.77382	23385
0.776714	20954.6		0.776714	21265.8		0.776714	18497.4		0.776714	20173.7		0.776714	21812.2		0.776714	23314.1
0.779608	20942.4		0.779608	21246.4		0.779608	18471.3		0.779608	20135.3		0.779608	21759.3		0.779608	23255.3
0.782502	20946		0.782502	21241.9		0.782502	18458.6		0.782502	20111.8		0.782502	21722.7		0.782502	23214.1
0.785396	20972.9		0.785396	21260.2		0.785396	18461.9		0.785396	20106.2		0.785396	21707.4		0.785396	23196.2
0.788289	21026.6		0.788289	21304.8		0.788289	18486.9		0.788289	20124.2		0.788289	21719.7		0.788289	23208.2
0.791183	21111.8		0.791183	21380.9		0.791183	18538.3		0.791183	20171.7		0.791183	21766.3		0.791183	23255.6
0.794077	21231		0.794077	21492.1		0.794077	18618.1		0.794077	20251.6		0.794077	21850.3		0.794077	23342.2
0.796971	21383.4		0.796971	21638		0.796971	18727		0.796971	20364.7		0.796971	21972.4		0.796971	23469.1
0.799865	21567.3		0.799865	21817.1		0.799865	18864.5		0.799865	20510.7		0.799865	22132.1		0.799865	23635.5
0.799865	21567.3		0.799865	21817.1		0.799865	18864.5		0.799865	20510.7		0.799865	22132.1		0.799865	23635.5
0.802759	21778.9		0.802759	22026		0.802759	19028.1		0.802759	20687.3		0.802759	22326.4		0.802759	23838.6
0.805653	22013.6		0.805653	22260.2		0.805653	19214.1		0.805653	20890.6		0.805653	22550.8		0.805653	24073.9
0.808547	22265.3		0.808547	22513.3		0.808547	19418		0.808547	21115.5		0.808547	22799.4		0.808547	24335.7
0.811441	22525.2		0.811441	22776.8		0.811441	19633.4		0.811441	21354.7		0.811441	23063.9		0.811441	24614.8
0.814334	22784.4		0.814334	23041.4		0.814334	19852.3		0.814334	21599.4		0.814334	23333.9		0.814334	24900.2
0.817228	23032.1		0.817228	23295.8		0.817228	20066.3		0.817228	21838.6		0.817228	23597.1		0.817228	25178.7
0.820122	23258.1		0.820122	23529.5		0.820122	20265.7		0.820122	22062.5		0.820122	23842.8		0.820122	25438.6
0.823016	23456.2		0.823016	23735.9		0.823016	20445.6		0.823016	22262		0.823016	24060.3		0.823016	25668.6
0.82591	23623.2		0.82591	23910.7		0.82591	20600.3		0.82591	22435.2		0.82591	24246.8		0.82591	25865.4
0.828804	23762.8		0.828804	24058.1		0.828804	20732.6		0.828804	22577.5		0.828804	24397.9		0.828804	26025
0.831698	23893.9		0.831698	24194.7		0.831698	20857.6		0.831698	22709.3		0.831698	24535.3		0.831698	26170.1
0.834592	24081.9		0.834592	24381.6		0.834592	21019.2		0.834592	22884.5		0.834592	24717.7		0.834592	26362.9
0.837486	24412.7		0.837486	24712.3		0.837486	21295.2		0.837486	23180.9		0.837486	25032.2		0.837486	26699.6
0.840379	24914.2		0.840379	25225.9		0.840379	21725.4		0.840379	23648.1		0.840379	25536.5		0.840379	27245.8
0.843273	25556.6		0.843273	25893.2		0.843273	22290.4		0.843273	24265.2		0.843273	26209.9		0.843273	27980.2
0.846167	26294.7		0.846167	26668.7		0.846167	22957		0.846167	24994		0.846167	27009.7		0.846167	28855
0.849061	27088.7		0.849061	27516.5		0.849061	23701.9		0.849061	25801.1		0.849061	27893.3		0.849061	29820
0.851955	27935.4		0.851955	28433.5		0.851955	24535.8		0.851955	26698.5		0.851955	28868.7		0.851955	30877.9
0.854849	28759.1		0.854849	29328.5		0.854849	25377.1		0.854849	27612.8		0.854849	29870.5		0.854849	31965.5
0.857743	29439.5		0.857743	30072.6		0.857743	26102.7		0.857743	28407.7		0.857743	30751.4		0.857743	32926.1
0.860637	29984.2		0.860637	30674.6		0.860637	26721.5		0.860637	29079.8		0.860637	31491.9		0.860637	33729.1
0.863531	30750.8		0.863531	31486.4		0.863531	27503.8		0.863531	29932.3		0.863531	32427.8		0.863531	34736.8
0.866424	32211.3		0.866424	33022.5		0.866424	28881.5		0.866424	31446.8		0.866424	34094.3		0.866424	36537.9
0.869318	34179.1		0.869318	35126.7		0.869318	30769.6		0.869318	33525		0.869318	36383.7		0.869318	39021.7
0.872212	36031.9		0.872212	37145		0.872212	32630.8		0.872212	35569.8		0.872212	38635.8		0.872212	41468.4
0.875106	37311.1		0.875106	38577.6		0.875106	34009.7		0.875106	37078.4		0.875106	40296.2		0.875106	43272.1
0.878	37763		0.878	39097.6		0.878	34529.8		0.878	37644.9		0.878	40919.4		0.878	43948.4
