# Supplementary material for: Assessment of the impact of using Ammonia-Hydrogen fuel blend in a diffusion combustor: A numerical approach
Source: Research Square preprint supplement (doi:10.21203/rs.3.rs-7960312/v1), 2025-11-25
Supplement: Supplementary file 7 [file b0eb43e41bd6b12ee3a2d106.xlsx]

## Sheet: Axial temp distribution
SN 0			SN 0.2			SN 0.4			SN 0.6			SN 0.8			SN 1
Axial distance	temperature		Axial distance	temperature		Axial distance	temperature		Axial distance	temperature		Axial distance	temperature		Axial distance	temperature
0.00115113	324.568		0.00115113	324.791		0.00115113	325.224		0.00115113	322.14		0.00115113	321.086		0.00115113	321.208
0.00404502	334.115		0.00404502	334.339		0.00404502	334.571		0.00404502	331.507		0.00404502	330.408		0.00404502	330.643
0.00693891	344.014		0.00693891	344.241		0.00693891	344.311		0.00693891	341.63		0.00693891	340.462		0.00693891	341.103
0.0098328	353.735		0.0098328	353.975		0.0098328	353.96		0.0098328	351.931		0.0098328	350.97		0.0098328	351.941
0.0127267	363.065		0.0127267	363.323		0.0127267	363.293		0.0127267	362.131		0.0127267	361.581		0.0127267	362.659
0.0156206	371.947		0.0156206	372.186		0.0156206	372.248		0.0156206	371.948		0.0156206	371.94		0.0156206	372.964
0.0185145	380.363		0.0185145	380.572		0.0185145	380.717		0.0185145	381.247		0.0185145	381.64		0.0185145	382.541
0.0214084	388.301		0.0214084	388.507		0.0214084	388.723		0.0214084	390.113		0.0214084	390.532		0.0214084	391.244
0.0243023	395.799		0.0243023	395.831		0.0243023	396.279		0.0243023	398.515		0.0243023	398.639		0.0243023	399.05
0.0271961	402.631		0.0271961	402.4		0.0271961	403.09		0.0271961	406.218		0.0271961	406.003		0.0271961	406.031
0.03009	409.115		0.03009	408.787		0.03009	409.482		0.03009	413.217		0.03009	412.579		0.03009	412.318
0.0329839	415.624		0.0329839	415.269		0.0329839	415.879		0.0329839	419.873		0.0329839	418.52		0.0329839	417.804
0.0358778	421.9		0.0358778	421.519		0.0358778	422.045		0.0358778	426.309		0.0358778	423.935		0.0358778	422.773
0.0387717	427.908		0.0387717	427.488		0.0387717	427.939		0.0387717	432.575		0.0387717	429.38		0.0387717	427.592
0.0416656	433.634		0.0416656	433.171		0.0416656	433.584		0.0416656	439.146		0.0416656	435.322		0.0416656	432.298
0.0445595	439.127		0.0445595	438.605		0.0445595	439.047		0.0445595	447.083		0.0445595	442.391		0.0445595	437.234
0.0474534	444.464		0.0474534	443.877		0.0474534	444.09		0.0474534	458.547		0.0474534	452.119		0.0474534	442.496
0.0503473	449.669		0.0503473	449.022		0.0503473	449.086		0.0503473	479.072		0.0503473	468.324		0.0503473	448.837
0.0532412	454.746		0.0532412	454.059		0.0532412	454.149		0.0532412	519.253		0.0532412	499.169		0.0532412	457.855
0.056135	459.726		0.056135	459.012		0.056135	459.365		0.056135	598.667		0.056135	559.879		0.056135	472.61
0.0590289	464.654		0.0590289	463.902		0.0590289	465.072		0.0590289	742.616		0.0590289	675.077		0.0590289	499.998
0.0619228	469.525		0.0619228	468.746		0.0619228	471.046		0.0619228	953.754		0.0619228	859.302		0.0619228	552.669
0.0648167	474.363		0.0648167	473.541		0.0648167	477.543		0.0648167	1185.63		0.0648167	1086		0.0648167	650.273
0.0677106	479.19		0.0677106	478.313		0.0677106	485.312		0.0677106	1360.86		0.0677106	1283.02		0.0677106	807.199
0.0706045	483.995		0.0706045	483.066		0.0706045	496.285		0.0706045	1432.41		0.0706045	1384.92		0.0706045	1011.16
0.0734984	488.809		0.0734984	487.811		0.0734984	514.923		0.0734984	1420.22		0.0734984	1390.35		0.0734984	1213.62
0.0763923	493.667		0.0763923	492.592		0.0763923	550.038		0.0763923	1374.6		0.0763923	1350.13		0.0763923	1353.89
0.0792862	498.54		0.0792862	497.426		0.0792862	614.701		0.0792862	1326.36		0.0792862	1305.86		0.0792862	1402.41
0.0821801	503.458		0.0821801	502.339		0.0821801	720.872		0.0821801	1283.68		0.0821801	1268.63		0.0821801	1385.13
0.085074	508.466		0.085074	507.36		0.085074	870.027		0.085074	1247.24		0.085074	1239.34		0.085074	1347.46
0.085074	508.466		0.085074	507.36		0.085074	870.027		0.085074	1247.24		0.085074	1239.34		0.085074	1347.46
0.0879678	513.538		0.0879678	512.478		0.0879678	1048.65		0.0879678	1216.78		0.0879678	1216.14		0.0879678	1311.11
0.0908617	518.691		0.0908617	517.683		0.0908617	1230.66		0.0908617	1191.68		0.0908617	1197.43		0.0908617	1281.01
0.0937556	523.929		0.0937556	522.991		0.0937556	1385.04		0.0937556	1170.51		0.0937556	1182.36		0.0937556	1257.05
0.0966495	529.258		0.0966495	528.424		0.0966495	1489.61		0.0966495	1152.73		0.0966495	1170.28		0.0966495	1238.19
0.0995434	534.705		0.0995434	534.008		0.0995434	1535.66		0.0995434	1137.94		0.0995434	1160.56		0.0995434	1223.52
0.102437	540.272		0.102437	539.75		0.102437	1527.26		0.102437	1125.65		0.102437	1152.77		0.102437	1212.09
0.105331	545.976		0.105331	545.667		0.105331	1483.99		0.105331	1115.52		0.105331	1146.56		0.105331	1203.17
0.108225	551.825		0.108225	551.778		0.108225	1427.5		0.108225	1107.19		0.108225	1141.63		0.108225	1196.28
0.111119	557.834		0.111119	558.069		0.111119	1369.5		0.111119	1100.38		0.111119	1137.76		0.111119	1190.97
0.114013	564.021		0.114013	564.547		0.114013	1315.39		0.114013	1094.84		0.114013	1134.8		0.114013	1186.86
0.116907	570.368		0.116907	571.263		0.116907	1267.36		0.116907	1090.38		0.116907	1132.53		0.116907	1183.65
0.119801	576.883		0.119801	578.208		0.119801	1226.02		0.119801	1086.82		0.119801	1130.79		0.119801	1181.19
0.122695	583.608		0.122695	585.395		0.122695	1191.2		0.122695	1083.99		0.122695	1129.45		0.122695	1179.34
0.125588	590.524		0.125588	592.867		0.125588	1162.15		0.125588	1081.75		0.125588	1128.42		0.125588	1177.94
0.128482	597.622		0.128482	600.612		0.128482	1137.92		0.128482	1079.98		0.128482	1127.61		0.128482	1176.86
0.131376	604.913		0.131376	608.567		0.131376	1117.7		0.131376	1078.6		0.131376	1126.95		0.131376	1176.01
0.13427	612.382		0.13427	616.714		0.13427	1100.85		0.13427	1077.52		0.13427	1126.41		0.13427	1175.32
0.137164	619.981		0.137164	625.076		0.137164	1086.87		0.137164	1076.67		0.137164	1125.95		0.137164	1174.74
0.140058	627.719		0.140058	633.453		0.140058	1075.26		0.140058	1075.99		0.140058	1125.55		0.140058	1174.23
0.142952	635.625		0.142952	641.833		0.142952	1065.67		0.142952	1075.43		0.142952	1125.18		0.142952	1173.77
0.145846	643.667		0.145846	650.498		0.145846	1057.73		0.145846	1074.97		0.145846	1124.83		0.145846	1173.34
0.14874	651.685		0.14874	659.62		0.14874	1051.17		0.14874	1074.58		0.14874	1124.5		0.14874	1172.94
0.151633	659.612		0.151633	669.026		0.151633	1045.78		0.151633	1074.23		0.151633	1124.18		0.151633	1172.54
0.154527	667.777		0.154527	678.535		0.154527	1041.36		0.154527	1073.92		0.154527	1123.86		0.154527	1172.15
0.157421	676.257		0.157421	688.172		0.157421	1037.74		0.157421	1073.62		0.157421	1123.55		0.157421	1171.76
0.160315	684.841		0.160315	697.793		0.160315	1034.8		0.160315	1073.35		0.160315	1123.23		0.160315	1171.37
0.163209	693.476		0.163209	707.383		0.163209	1032.4		0.163209	1073.08		0.163209	1122.91		0.163209	1170.97
0.166103	702.149		0.166103	717.15		0.166103	1030.46		0.166103	1072.81		0.166103	1122.6		0.166103	1170.57
0.166103	702.149		0.166103	717.15		0.166103	1030.46		0.166103	1072.81		0.166103	1122.6		0.166103	1170.57
0.168997	710.863		0.168997	727.125		0.168997	1028.88		0.168997	1072.55		0.168997	1122.28		0.168997	1170.17
0.171891	719.592		0.171891	737.214		0.171891	1027.61		0.171891	1072.29		0.171891	1121.96		0.171891	1169.76
0.174785	728.321		0.174785	747.38		0.174785	1026.59		0.174785	1072.04		0.174785	1121.63		0.174785	1169.36
0.177678	737.06		0.177678	757.603		0.177678	1025.76		0.177678	1071.78		0.177678	1121.31		0.177678	1168.95
0.180572	745.8		0.180572	767.878		0.180572	1025.09		0.180572	1071.52		0.180572	1120.98		0.180572	1168.53
0.183466	754.536		0.183466	778.17		0.183466	1024.53		0.183466	1071.26		0.183466	1120.64		0.183466	1168.11
0.18636	763.233		0.18636	788.476		0.18636	1024.06		0.18636	1071		0.18636	1120.31		0.18636	1167.68
0.189254	771.894		0.189254	798.842		0.189254	1023.66		0.189254	1070.73		0.189254	1119.96		0.189254	1167.25
0.192148	780.537		0.192148	809.279		0.192148	1023.31		0.192148	1070.46		0.192148	1119.62		0.192148	1166.81
0.195042	789.151		0.195042	819.78		0.195042	1023		0.195042	1070.19		0.195042	1119.27		0.195042	1166.37
0.197936	797.751		0.197936	830.339		0.197936	1022.71		0.197936	1069.91		0.197936	1118.91		0.197936	1165.92
0.20083	806.343		0.20083	840.957		0.20083	1022.44		0.20083	1069.63		0.20083	1118.55		0.20083	1165.46
0.203723	814.929		0.203723	851.633		0.203723	1022.19		0.203723	1069.34		0.203723	1118.18		0.203723	1164.99
0.206617	823.518		0.206617	862.373		0.206617	1021.94		0.206617	1069.06		0.206617	1117.81		0.206617	1164.52
0.209511	832.106		0.209511	873.182		0.209511	1021.7		0.209511	1068.77		0.209511	1117.44		0.209511	1164.05
0.212405	840.672		0.212405	884.063		0.212405	1021.46		0.212405	1068.47		0.212405	1117.06		0.212405	1163.56
0.215299	849.22		0.215299	895.016		0.215299	1021.22		0.215299	1068.17		0.215299	1116.67		0.215299	1163.07
0.215299	849.22		0.215299	895.016		0.215299	1021.22		0.215299	1068.17		0.215299	1116.67		0.215299	1163.07
0.218193	857.761		0.218193	906.045		0.218193	1020.98		0.218193	1067.87		0.218193	1116.28		0.218193	1162.58
0.221087	866.285		0.221087	917.156		0.221087	1020.74		0.221087	1067.56		0.221087	1115.89		0.221087	1162.07
0.223981	874.792		0.223981	928.356		0.223981	1020.5		0.223981	1067.26		0.223981	1115.49		0.223981	1161.56
0.226875	883.282		0.226875	939.654		0.226875	1020.26		0.226875	1066.94		0.226875	1115.08		0.226875	1161.05
0.229768	891.765		0.229768	951.055		0.229768	1020.02		0.229768	1066.63		0.229768	1114.67		0.229768	1160.52
0.232662	900.236		0.232662	962.577		0.232662	1019.78		0.232662	1066.31		0.232662	1114.26		0.232662	1159.99
0.235556	908.695		0.235556	974.232		0.235556	1019.53		0.235556	1065.98		0.235556	1113.84		0.235556	1159.46
0.23845	917.167		0.23845	986.014		0.23845	1019.28		0.23845	1065.66		0.23845	1113.42		0.23845	1158.92
0.241344	925.659		0.241344	997.939		0.241344	1019.03		0.241344	1065.33		0.241344	1112.99		0.241344	1158.37
0.244238	934.163		0.244238	1010.01		0.244238	1018.77		0.244238	1065		0.244238	1112.56		0.244238	1157.82
0.247132	942.682		0.247132	1022.23		0.247132	1018.52		0.247132	1064.66		0.247132	1112.12		0.247132	1157.26
0.250026	951.227		0.250026	1034.56		0.250026	1018.26		0.250026	1064.32		0.250026	1111.68		0.250026	1156.69
0.25292	959.794		0.25292	1047.05		0.25292	1017.99		0.25292	1063.98		0.25292	1111.23		0.25292	1156.12
0.255814	968.383		0.255814	1059.73		0.255814	1017.73		0.255814	1063.64		0.255814	1110.78		0.255814	1155.54
0.258707	977.013		0.258707	1072.6		0.258707	1017.46		0.258707	1063.29		0.258707	1110.33		0.258707	1154.96
0.261601	985.69		0.261601	1085.64		0.261601	1017.19		0.261601	1062.94		0.261601	1109.87		0.261601	1154.37
0.264495	994.421		0.264495	1098.86		0.264495	1016.92		0.264495	1062.58		0.264495	1109.41		0.264495	1153.77
0.267389	1003.21		0.267389	1112.34		0.267389	1016.65		0.267389	1062.23		0.267389	1108.94		0.267389	1153.17
0.270283	1012.08		0.270283	1126		0.270283	1016.37		0.270283	1061.87		0.270283	1108.47		0.270283	1152.56
0.273177	1021.04		0.273177	1139.89		0.273177	1016.09		0.273177	1061.51		0.273177	1108		0.273177	1151.95
0.276071	1030.06		0.276071	1154.04		0.276071	1015.81		0.276071	1061.14		0.276071	1107.52		0.276071	1151.33
0.278965	1039.16		0.278965	1168.39		0.278965	1015.53		0.278965	1060.78		0.278965	1107.04		0.278965	1150.71
0.281859	1048.37		0.281859	1182.93		0.281859	1015.24		0.281859	1060.41		0.281859	1106.55		0.281859	1150.08
0.284752	1057.69		0.284752	1197.7		0.284752	1014.95		0.284752	1060.03		0.284752	1106.06		0.284752	1149.45
0.287646	1067.15		0.287646	1212.78		0.287646	1014.66		0.287646	1059.66		0.287646	1105.57		0.287646	1148.81
0.29054	1076.74		0.29054	1228.17		0.29054	1014.37		0.29054	1059.28		0.29054	1105.07		0.29054	1148.17
0.293434	1086.47		0.293434	1243.85		0.293434	1014.08		0.293434	1058.9		0.293434	1104.57		0.293434	1147.52
0.296328	1096.37		0.296328	1259.78		0.296328	1013.79		0.296328	1058.52		0.296328	1104.06		0.296328	1146.86
0.299222	1106.42		0.299222	1275.89		0.299222	1013.49		0.299222	1058.14		0.299222	1103.55		0.299222	1146.21
0.302116	1116.62		0.302116	1292.21		0.302116	1013.19		0.302116	1057.75		0.302116	1103.04		0.302116	1145.54
0.30501	1127		0.30501	1308.76		0.30501	1012.89		0.30501	1057.36		0.30501	1102.52		0.30501	1144.88
0.307904	1137.58		0.307904	1325.55		0.307904	1012.59		0.307904	1056.97		0.307904	1102		0.307904	1144.21
0.310797	1148.39		0.310797	1342.61		0.310797	1012.28		0.310797	1056.58		0.310797	1101.48		0.310797	1143.53
0.313691	1159.44		0.313691	1359.94		0.313691	1011.98		0.313691	1056.18		0.313691	1100.95		0.313691	1142.85
0.313691	1159.44		0.313691	1359.94		0.313691	1011.98		0.313691	1056.18		0.313691	1100.95		0.313691	1142.85
0.316585	1170.72		0.316585	1377.49		0.316585	1011.67		0.316585	1055.78		0.316585	1100.42		0.316585	1142.16
0.319479	1182.27		0.319479	1395.26		0.319479	1011.37		0.319479	1055.38		0.319479	1099.89		0.319479	1141.47
0.322373	1194.13		0.322373	1413.23		0.322373	1011.06		0.322373	1054.98		0.322373	1099.35		0.322373	1140.78
0.325267	1206.3		0.325267	1431.49		0.325267	1010.75		0.325267	1054.58		0.325267	1098.81		0.325267	1140.08
0.328161	1218.88		0.328161	1450.05		0.328161	1010.43		0.328161	1054.17		0.328161	1098.27		0.328161	1139.38
0.331055	1231.83		0.331055	1468.81		0.331055	1010.12		0.331055	1053.76		0.331055	1097.72		0.331055	1138.68
0.333949	1245.07		0.333949	1487.67		0.333949	1009.81		0.333949	1053.35		0.333949	1097.18		0.333949	1137.97
0.336842	1258.68		0.336842	1506.6		0.336842	1009.49		0.336842	1052.94		0.336842	1096.62		0.336842	1137.26
0.339736	1272.67		0.339736	1525.69		0.339736	1009.17		0.339736	1052.53		0.339736	1096.07		0.339736	1136.54
0.34263	1287.07		0.34263	1544.92		0.34263	1008.86		0.34263	1052.11		0.34263	1095.51		0.34263	1135.82
0.345524	1301.93		0.345524	1564.28		0.345524	1008.54		0.345524	1051.69		0.345524	1094.95		0.345524	1135.1
0.348418	1317.24		0.348418	1583.73		0.348418	1008.22		0.348418	1051.27		0.348418	1094.38		0.348418	1134.37
0.351312	1332.99		0.351312	1603.16		0.351312	1007.89		0.351312	1050.85		0.351312	1093.81		0.351312	1133.64
0.354206	1349.24		0.354206	1622.62		0.354206	1007.57		0.354206	1050.42		0.354206	1093.24		0.354206	1132.91
0.3571	1365.95		0.3571	1642.1		0.3571	1007.25		0.3571	1050		0.3571	1092.67		0.3571	1132.18
0.359994	1383.03		0.359994	1661.45		0.359994	1006.92		0.359994	1049.57		0.359994	1092.1		0.359994	1131.44
0.362887	1400.55		0.362887	1680.73		0.362887	1006.6		0.362887	1049.14		0.362887	1091.52		0.362887	1130.7
0.365781	1418.64		0.365781	1699.9		0.365781	1006.27		0.365781	1048.7		0.365781	1090.94		0.365781	1129.96
0.368675	1437.31		0.368675	1718.66		0.368675	1005.94		0.368675	1048.27		0.368675	1090.35		0.368675	1129.21
0.371569	1456.32		0.371569	1736.92		0.371569	1005.61		0.371569	1047.83		0.371569	1089.77		0.371569	1128.46
0.374463	1475.62		0.374463	1754.94		0.374463	1005.28		0.374463	1047.4		0.374463	1089.18		0.374463	1127.71
0.377357	1495.21		0.377357	1772.7		0.377357	1004.95		0.377357	1046.96		0.377357	1088.59		0.377357	1126.96
0.380251	1515.09		0.380251	1789.64		0.380251	1004.62		0.380251	1046.52		0.380251	1087.99		0.380251	1126.2
0.383145	1535.18		0.383145	1805.64		0.383145	1004.29		0.383145	1046.07		0.383145	1087.4		0.383145	1125.45
0.386039	1555.59		0.386039	1820.99		0.386039	1003.95		0.386039	1045.63		0.386039	1086.8		0.386039	1124.69
0.388932	1576.31		0.388932	1835.24		0.388932	1003.62		0.388932	1045.18		0.388932	1086.2		0.388932	1123.93
0.391826	1596.92		0.391826	1847.99		0.391826	1003.28		0.391826	1044.73		0.391826	1085.6		0.391826	1123.17
0.39472	1617.3		0.39472	1858.67		0.39472	1002.95		0.39472	1044.28		0.39472	1085		0.39472	1122.4
0.397614	1637.43		0.397614	1866.49		0.397614	1002.61		0.397614	1043.83		0.397614	1084.39		0.397614	1121.64
0.400508	1657.17		0.400508	1871.89		0.400508	1002.27		0.400508	1043.38		0.400508	1083.78		0.400508	1120.87
0.403402	1676.37		0.403402	1875.11		0.403402	1001.93		0.403402	1042.93		0.403402	1083.17		0.403402	1120.1
0.403402	1676.37		0.403402	1875.11		0.403402	1001.93		0.403402	1042.93		0.403402	1083.17		0.403402	1120.1
0.406296	1694.96		0.406296	1875.95		0.406296	1001.59		0.406296	1042.47		0.406296	1082.56		0.406296	1119.33
0.40919	1712.78		0.40919	1874.42		0.40919	1001.25		0.40919	1042.01		0.40919	1081.95		0.40919	1118.56
0.412084	1729.47		0.412084	1870.86		0.412084	1000.91		0.412084	1041.55		0.412084	1081.33		0.412084	1117.79
0.414977	1744.64		0.414977	1865.5		0.414977	1000.57		0.414977	1041.09		0.414977	1080.72		0.414977	1117.02
0.417871	1758.15		0.417871	1858.36		0.417871	1000.22		0.417871	1040.63		0.417871	1080.1		0.417871	1116.25
0.420765	1768.71		0.420765	1849.9		0.420765	999.88		0.420765	1040.17		0.420765	1079.48		0.420765	1115.48
0.423659	1775.94		0.423659	1840.27		0.423659	999.534		0.423659	1039.71		0.423659	1078.86		0.423659	1114.7
0.426553	1780.67		0.426553	1829.36		0.426553	999.188		0.426553	1039.24		0.426553	1078.24		0.426553	1113.93
0.429447	1783.06		0.429447	1817.34		0.429447	998.842		0.429447	1038.77		0.429447	1077.62		0.429447	1113.16
0.432341	1783.12		0.432341	1804.71		0.432341	998.494		0.432341	1038.31		0.432341	1077		0.432341	1112.38
0.435235	1780.73		0.435235	1791.35		0.435235	998.146		0.435235	1037.84		0.435235	1076.37		0.435235	1111.61
0.438129	1776.14		0.438129	1777.04		0.438129	997.796		0.438129	1037.37		0.438129	1075.75		0.438129	1110.84
0.441023	1769.63		0.441023	1762.09		0.441023	997.446		0.441023	1036.9		0.441023	1075.12		0.441023	1110.06
0.443916	1761.44		0.443916	1746.78		0.443916	997.096		0.443916	1036.42		0.443916	1074.5		0.443916	1109.29
0.44681	1751.8		0.44681	1731.07		0.44681	996.744		0.44681	1035.95		0.44681	1073.87		0.44681	1108.52
0.449704	1740.89		0.449704	1714.98		0.449704	996.392		0.449704	1035.48		0.449704	1073.24		0.449704	1107.74
0.452598	1729.02		0.452598	1698.68		0.452598	996.038		0.452598	1035		0.452598	1072.62		0.452598	1106.97
0.455492	1716.33		0.455492	1682.22		0.455492	995.685		0.455492	1034.52		0.455492	1071.99		0.455492	1106.2
0.458386	1702.77		0.458386	1665.64		0.458386	995.33		0.458386	1034.05		0.458386	1071.36		0.458386	1105.43
0.46128	1688.55		0.46128	1649		0.46128	994.975		0.46128	1033.57		0.46128	1070.73		0.46128	1104.66
0.464174	1673.98		0.464174	1632.37		0.464174	994.618		0.464174	1033.09		0.464174	1070.1		0.464174	1103.89
0.467068	1658.97		0.467068	1615.79		0.467068	994.262		0.467068	1032.61		0.467068	1069.47		0.467068	1103.12
0.469961	1643.48		0.469961	1599.3		0.469961	993.904		0.469961	1032.13		0.469961	1068.84		0.469961	1102.35
0.472855	1627.69		0.472855	1582.94		0.472855	993.546		0.472855	1031.65		0.472855	1068.21		0.472855	1101.59
0.475749	1611.79		0.475749	1566.7		0.475749	993.187		0.475749	1031.17		0.475749	1067.58		0.475749	1100.82
0.478643	1595.83		0.478643	1550.61		0.478643	992.827		0.478643	1030.68		0.478643	1066.95		0.478643	1100.06
0.481537	1579.8		0.481537	1534.73		0.481537	992.467		0.481537	1030.2		0.481537	1066.32		0.481537	1099.29
0.484431	1563.69		0.484431	1519.1		0.484431	992.106		0.484431	1029.72		0.484431	1065.69		0.484431	1098.53
0.487325	1547.54		0.487325	1503.7		0.487325	991.744		0.487325	1029.23		0.487325	1065.06		0.487325	1097.77
0.490219	1531.52		0.490219	1488.6		0.490219	991.382		0.490219	1028.75		0.490219	1064.43		0.490219	1097.01
0.493113	1515.66		0.493113	1473.78		0.493113	991.018		0.493113	1028.26		0.493113	1063.8		0.493113	1096.25
0.496006	1500.01		0.496006	1459.18		0.496006	990.655		0.496006	1027.78		0.496006	1063.17		0.496006	1095.49
0.4989	1484.62		0.4989	1444.83		0.4989	990.291		0.4989	1027.29		0.4989	1062.54		0.4989	1094.74
0.501794	1469.37		0.501794	1430.76		0.501794	989.926		0.501794	1026.8		0.501794	1061.91		0.501794	1093.99
0.504688	1454.29		0.504688	1417.04		0.504688	989.56		0.504688	1026.32		0.504688	1061.28		0.504688	1093.23
0.507582	1439.43		0.507582	1403.66		0.507582	989.194		0.507582	1025.83		0.507582	1060.66		0.507582	1092.48
0.510476	1424.81		0.510476	1390.63		0.510476	988.828		0.510476	1025.34		0.510476	1060.03		0.510476	1091.73
0.51337	1410.5		0.51337	1378		0.51337	988.46		0.51337	1024.85		0.51337	1059.4		0.51337	1090.99
0.516264	1396.52		0.516264	1365.71		0.516264	988.093		0.516264	1024.36		0.516264	1058.78		0.516264	1090.24
0.519158	1382.91		0.519158	1353.73		0.519158	987.724		0.519158	1023.88		0.519158	1058.16		0.519158	1089.5
0.522051	1369.62		0.522051	1342.09		0.522051	987.356		0.522051	1023.39		0.522051	1057.53		0.522051	1088.76
0.524945	1356.6		0.524945	1330.75		0.524945	986.986		0.524945	1022.9		0.524945	1056.91		0.524945	1088.02
0.524945	1356.6		0.524945	1330.75		0.524945	986.986		0.524945	1022.9		0.524945	1056.91		0.524945	1088.02
0.527839	1343.88		0.527839	1319.68		0.527839	986.617		0.527839	1022.41		0.527839	1056.29		0.527839	1087.29
0.530733	1331.48		0.530733	1308.93		0.530733	986.247		0.530733	1021.92		0.530733	1055.67		0.530733	1086.55
0.533627	1319.4		0.533627	1298.5		0.533627	985.876		0.533627	1021.44		0.533627	1055.05		0.533627	1085.82
0.536521	1307.65		0.536521	1288.37		0.536521	985.505		0.536521	1020.95		0.536521	1054.43		0.536521	1085.09
0.539415	1296.22		0.539415	1278.54		0.539415	985.133		0.539415	1020.46		0.539415	1053.82		0.539415	1084.36
0.542309	1285.1		0.542309	1269.01		0.542309	984.761		0.542309	1019.97		0.542309	1053.2		0.542309	1083.64
0.545203	1274.31		0.545203	1259.77		0.545203	984.389		0.545203	1019.49		0.545203	1052.59		0.545203	1082.91
0.548096	1263.84		0.548096	1250.82		0.548096	984.017		0.548096	1019		0.548096	1051.97		0.548096	1082.19
0.55099	1253.67		0.55099	1242.15		0.55099	983.644		0.55099	1018.51		0.55099	1051.36		0.55099	1081.47
0.553884	1243.8		0.553884	1233.74		0.553884	983.27		0.553884	1018.03		0.553884	1050.75		0.553884	1080.76
0.556778	1234.24		0.556778	1225.61		0.556778	982.897		0.556778	1017.54		0.556778	1050.14		0.556778	1080.04
0.559672	1224.99		0.559672	1217.74		0.559672	982.523		0.559672	1017.05		0.559672	1049.54		0.559672	1079.33
0.562566	1216.01		0.562566	1210.12		0.562566	982.149		0.562566	1016.57		0.562566	1048.93		0.562566	1078.63
0.56546	1207.3		0.56546	1202.75		0.56546	981.774		0.56546	1016.09		0.56546	1048.33		0.56546	1077.92
0.568354	1198.9		0.568354	1195.62		0.568354	981.4		0.568354	1015.6		0.568354	1047.73		0.568354	1077.22
0.571248	1190.81		0.571248	1188.72		0.571248	981.025		0.571248	1015.12		0.571248	1047.12		0.571248	1076.52
0.574142	1182.99		0.574142	1182.06		0.574142	980.65		0.574142	1014.64		0.574142	1046.53		0.574142	1075.82
0.577035	1175.44		0.577035	1175.62		0.577035	980.274		0.577035	1014.15		0.577035	1045.93		0.577035	1075.12
0.579929	1168.14		0.579929	1169.4		0.579929	979.899		0.579929	1013.67		0.579929	1045.33		0.579929	1074.43
0.582823	1161.06		0.582823	1163.39		0.582823	979.524		0.582823	1013.19		0.582823	1044.74		0.582823	1073.74
0.585717	1154.22		0.585717	1157.57		0.585717	979.148		0.585717	1012.71		0.585717	1044.15		0.585717	1073.05
0.588611	1147.64		0.588611	1151.94		0.588611	978.772		0.588611	1012.23		0.588611	1043.56		0.588611	1072.37
0.591505	1141.31		0.591505	1146.5		0.591505	978.397		0.591505	1011.76		0.591505	1042.97		0.591505	1071.68
0.594399	1135.19		0.594399	1141.22		0.594399	978.021		0.594399	1011.28		0.594399	1042.38		0.594399	1071
0.597293	1129.29		0.597293	1136.12		0.597293	977.645		0.597293	1010.8		0.597293	1041.8		0.597293	1070.33
0.600186	1123.58		0.600186	1131.2		0.600186	977.27		0.600186	1010.33		0.600186	1041.22		0.600186	1069.65
0.60308	1118.05		0.60308	1126.45		0.60308	976.894		0.60308	1009.85		0.60308	1040.64		0.60308	1068.98
0.605974	1112.69		0.605974	1121.86		0.605974	976.518		0.605974	1009.38		0.605974	1040.06		0.605974	1068.31
0.608868	1107.53		0.608868	1117.41		0.608868	976.143		0.608868	1008.91		0.608868	1039.48		0.608868	1067.65
0.611762	1102.57		0.611762	1113.1		0.611762	975.768		0.611762	1008.44		0.611762	1038.91		0.611762	1066.98
0.614656	1097.8		0.614656	1108.91		0.614656	975.393		0.614656	1007.97		0.614656	1038.34		0.614656	1066.32
0.61755	1093.21		0.61755	1104.86		0.61755	975.018		0.61755	1007.5		0.61755	1037.77		0.61755	1065.67
0.620444	1088.78		0.620444	1100.94		0.620444	974.643		0.620444	1007.03		0.620444	1037.2		0.620444	1065.01
0.623338	1084.51		0.623338	1097.16		0.623338	974.269		0.623338	1006.56		0.623338	1036.63		0.623338	1064.36
0.626231	1080.38		0.626231	1093.5		0.626231	973.894		0.626231	1006.1		0.626231	1036.07		0.626231	1063.71
0.629125	1076.39		0.629125	1089.96		0.629125	973.521		0.629125	1005.64		0.629125	1035.51		0.629125	1063.06
0.632019	1072.52		0.632019	1086.54		0.632019	973.147		0.632019	1005.17		0.632019	1034.95		0.632019	1062.42
0.634913	1068.77		0.634913	1083.23		0.634913	972.774		0.634913	1004.71		0.634913	1034.39		0.634913	1061.78
0.637807	1065.14		0.637807	1080.03		0.637807	972.401		0.637807	1004.25		0.637807	1033.84		0.637807	1061.14
0.640701	1061.64		0.640701	1076.93		0.640701	972.029		0.640701	1003.79		0.640701	1033.28		0.640701	1060.5
0.643595	1058.27		0.643595	1073.91		0.643595	971.657		0.643595	1003.34		0.643595	1032.73		0.643595	1059.87
0.643595	1058.27		0.643595	1073.91		0.643595	971.657		0.643595	1003.34		0.643595	1032.73		0.643595	1059.87
0.646489	1055.01		0.646489	1070.99		0.646489	971.286		0.646489	1002.88		0.646489	1032.19		0.646489	1059.24
0.649383	1051.86		0.649383	1068.16		0.649383	970.915		0.649383	1002.43		0.649383	1031.64		0.649383	1058.61
0.652277	1048.83		0.652277	1065.41		0.652277	970.545		0.652277	1001.98		0.652277	1031.09		0.652277	1057.98
0.65517	1045.89		0.65517	1062.74		0.65517	970.175		0.65517	1001.52		0.65517	1030.55		0.65517	1057.36
0.658064	1043.05		0.658064	1060.16		0.658064	969.806		0.658064	1001.08		0.658064	1030.01		0.658064	1056.73
0.660958	1040.31		0.660958	1057.64		0.660958	969.437		0.660958	1000.63		0.660958	1029.47		0.660958	1056.12
0.663852	1037.66		0.663852	1055.2		0.663852	969.07		0.663852	1000.18		0.663852	1028.94		0.663852	1055.5
0.666746	1035.1		0.666746	1052.83		0.666746	968.703		0.666746	999.737		0.666746	1028.4		0.666746	1054.88
0.66964	1032.63		0.66964	1050.53		0.66964	968.336		0.66964	999.293		0.66964	1027.87		0.66964	1054.27
0.672534	1030.23		0.672534	1048.3		0.672534	967.971		0.672534	998.851		0.672534	1027.34		0.672534	1053.66
0.675428	1027.92		0.675428	1046.12		0.675428	967.606		0.675428	998.411		0.675428	1026.81		0.675428	1053.05
0.678322	1025.69		0.678322	1044.01		0.678322	967.241		0.678322	997.972		0.678322	1026.29		0.678322	1052.44
0.681215	1023.52		0.681215	1041.95		0.681215	966.878		0.681215	997.535		0.681215	1025.76		0.681215	1051.84
0.684109	1021.43		0.684109	1039.95		0.684109	966.515		0.684109	997.099		0.684109	1025.24		0.684109	1051.23
0.687003	1019.4		0.687003	1038		0.687003	966.154		0.687003	996.664		0.687003	1024.72		0.687003	1050.63
0.689897	1017.44		0.689897	1036.1		0.689897	965.793		0.689897	996.231		0.689897	1024.2		0.689897	1050.03
0.692791	1015.54		0.692791	1034.26		0.692791	965.432		0.692791	995.799		0.692791	1023.68		0.692791	1049.43
0.695685	1013.71		0.695685	1032.45		0.695685	965.073		0.695685	995.368		0.695685	1023.16		0.695685	1048.83
0.698579	1011.93		0.698579	1030.7		0.698579	964.715		0.698579	994.939		0.698579	1022.64		0.698579	1048.23
0.701473	1010.2		0.701473	1028.99		0.701473	964.357		0.701473	994.51		0.701473	1022.13		0.701473	1047.63
0.704367	1008.53		0.704367	1027.31		0.704367	964		0.704367	994.083		0.704367	1021.61		0.704367	1047.03
0.70726	1006.9		0.70726	1025.68		0.70726	963.643		0.70726	993.656		0.70726	1021.1		0.70726	1046.43
0.710154	1005.32		0.710154	1024.08		0.710154	963.288		0.710154	993.23		0.710154	1020.59		0.710154	1045.84
0.713048	1003.78		0.713048	1022.52		0.713048	962.933		0.713048	992.805		0.713048	1020.07		0.713048	1045.24
0.715942	1002.28		0.715942	1020.99		0.715942	962.578		0.715942	992.38		0.715942	1019.56		0.715942	1044.64
0.715942	1002.28		0.715942	1020.99		0.715942	962.578		0.715942	992.38		0.715942	1019.56		0.715942	1044.64
0.718836	1000.82		0.718836	1019.5		0.718836	962.224		0.718836	991.955		0.718836	1019.04		0.718836	1044.03
0.72173	999.405		0.72173	1018.03		0.72173	961.87		0.72173	991.531		0.72173	1018.53		0.72173	1043.43
0.724624	998.023		0.724624	1016.6		0.724624	961.517		0.724624	991.106		0.724624	1018.01		0.724624	1042.82
0.727518	996.675		0.727518	1015.19		0.727518	961.163		0.727518	990.68		0.727518	1017.49		0.727518	1042.22
0.730412	995.359		0.730412	1013.81		0.730412	960.81		0.730412	990.253		0.730412	1016.97		0.730412	1041.6
0.733305	994.075		0.733305	1012.45		0.733305	960.456		0.733305	989.825		0.733305	1016.44		0.733305	1040.99
0.736199	992.82		0.736199	1011.12		0.736199	960.101		0.736199	989.395		0.736199	1015.91		0.736199	1040.36
0.739093	991.593		0.739093	1009.81		0.739093	959.745		0.739093	988.962		0.739093	1015.38		0.739093	1039.73
0.741987	990.39		0.741987	1008.52		0.741987	959.388		0.741987	988.526		0.741987	1014.84		0.741987	1039.1
0.744881	989.211		0.744881	1007.25		0.744881	959.028		0.744881	988.087		0.744881	1014.3		0.744881	1038.45
0.747775	988.052		0.747775	1005.99		0.747775	958.666		0.747775	987.642		0.747775	1013.75		0.747775	1037.8
0.750669	986.912		0.750669	1004.75		0.750669	958.301		0.750669	987.191		0.750669	1013.19		0.750669	1037.13
0.753563	985.789		0.753563	1003.52		0.753563	957.932		0.753563	986.733		0.753563	1012.62		0.753563	1036.46
0.756457	984.679		0.756457	1002.29		0.756457	957.558		0.756457	986.266		0.756457	1012.03		0.756457	1035.76
0.75935	983.581		0.75935	1001.07		0.75935	957.177		0.75935	985.79		0.75935	1011.44		0.75935	1035.05
0.762244	982.492		0.762244	999.859		0.762244	956.79		0.762244	985.302		0.762244	1010.82		0.762244	1034.32
0.765138	981.408		0.765138	998.643		0.765138	956.393		0.765138	984.801		0.765138	1010.19		0.765138	1033.57
0.768032	980.328		0.768032	997.423		0.768032	955.987		0.768032	984.285		0.768032	1009.54		0.768032	1032.79
0.770926	979.246		0.770926	996.195		0.770926	955.568		0.770926	983.752		0.770926	1008.87		0.770926	1031.99
0.77382	978.161		0.77382	994.954		0.77382	955.137		0.77382	983.2		0.77382	1008.17		0.77382	1031.15
0.776714	977.068		0.776714	993.698		0.776714	954.691		0.776714	982.628		0.776714	1007.44		0.776714	1030.28
0.779608	975.964		0.779608	992.423		0.779608	954.228		0.779608	982.034		0.779608	1006.68		0.779608	1029.38
0.782502	974.847		0.782502	991.125		0.782502	953.748		0.782502	981.415		0.782502	1005.89		0.782502	1028.44
0.785396	973.713		0.785396	989.803		0.785396	953.249		0.785396	980.772		0.785396	1005.07		0.785396	1027.45
0.788289	972.562		0.788289	988.456		0.788289	952.73		0.788289	980.103		0.788289	1004.21		0.788289	1026.42
0.791183	971.391		0.791183	987.084		0.791183	952.19		0.791183	979.405		0.791183	1003.31		0.791183	1025.35
0.794077	970.2		0.794077	985.689		0.794077	951.628		0.794077	978.679		0.794077	1002.38		0.794077	1024.23
0.796971	968.992		0.796971	984.275		0.796971	951.042		0.796971	977.921		0.796971	1001.4		0.796971	1023.06
0.799865	967.767		0.799865	982.843		0.799865	950.431		0.799865	977.132		0.799865	1000.39		0.799865	1021.84
0.799865	967.767		0.799865	982.843		0.799865	950.431		0.799865	977.132		0.799865	1000.39		0.799865	1021.84
0.802759	966.53		0.802759	981.398		0.802759	949.793		0.802759	976.31		0.802759	999.327		0.802759	1020.57
0.805653	965.283		0.805653	979.944		0.805653	949.127		0.805653	975.451		0.805653	998.224		0.805653	1019.25
0.808547	964.029		0.808547	978.481		0.808547	948.429		0.808547	974.556		0.808547	997.075		0.808547	1017.88
0.811441	962.771		0.811441	977.012		0.811441	947.697		0.811441	973.621		0.811441	995.88		0.811441	1016.46
0.814334	961.511		0.814334	975.537		0.814334	946.929		0.814334	972.644		0.814334	994.637		0.814334	1014.99
0.817228	960.25		0.817228	974.056		0.817228	946.121		0.817228	971.623		0.817228	993.346		0.817228	1013.47
0.820122	958.988		0.820122	972.568		0.820122	945.271		0.820122	970.556		0.820122	992.007		0.820122	1011.89
0.823016	957.727		0.823016	971.071		0.823016	944.375		0.823016	969.441		0.823016	990.617		0.823016	1010.27
0.82591	956.465		0.82591	969.566		0.82591	943.43		0.82591	968.277		0.82591	989.178		0.82591	1008.6
0.828804	955.203		0.828804	968.051		0.828804	942.433		0.828804	967.061		0.828804	987.689		0.828804	1006.88
0.831698	953.94		0.831698	966.526		0.831698	941.382		0.831698	965.792		0.831698	986.152		0.831698	1005.11
0.834592	952.678		0.834592	964.992		0.834592	940.276		0.834592	964.472		0.834592	984.569		0.834592	1003.31
0.837486	951.417		0.837486	963.451		0.837486	939.112		0.837486	963.1		0.837486	982.941		0.837486	1001.47
0.840379	950.159		0.840379	961.904		0.840379	937.891		0.840379	961.678		0.840379	981.274		0.840379	999.593
0.843273	948.906		0.843273	960.355		0.843273	936.615		0.843273	960.209		0.843273	979.571		0.843273	997.693
0.846167	947.662		0.846167	958.808		0.846167	935.285		0.846167	958.697		0.846167	977.838		0.846167	995.773
0.849061	946.43		0.849061	957.268		0.849061	933.906		0.849061	957.149		0.849061	976.083		0.849061	993.843
0.851955	945.215		0.851955	955.741		0.851955	932.484		0.851955	955.572		0.851955	974.315		0.851955	991.911
0.854849	944.021		0.854849	954.234		0.854849	931.027		0.854849	953.975		0.854849	972.544		0.854849	989.989
0.857743	942.857		0.857743	952.757		0.857743	929.547		0.857743	952.37		0.857743	970.783		0.857743	988.089
0.860637	941.731		0.860637	951.321		0.860637	928.058		0.860637	950.772		0.860637	969.047		0.860637	986.227
0.863531	940.653		0.863531	949.939		0.863531	926.579		0.863531	949.202		0.863531	967.356		0.863531	984.425
0.866424	939.641		0.866424	948.634		0.866424	925.139		0.866424	947.686		0.866424	965.738		0.866424	982.709
0.869318	938.717		0.869318	947.438		0.869318	923.778		0.869318	946.267		0.869318	964.236		0.869318	981.123
0.872212	937.922		0.872212	946.401		0.872212	922.564		0.872212	945.012		0.872212	962.917		0.872212	979.737
0.875106	937.323		0.875106	945.612		0.875106	921.613		0.875106	944.038		0.875106	961.902		0.875106	978.676
0.878	937.086		0.878	945.296		0.878	921.221		0.878	943.641		0.878	961.49		0.878	978.246

## Sheet: Axial Velocity
SN 0			SN 0.2			SN 0.4			SN 0.6			SN 0.8			SN 1
Axial distance	velocity		Axial distance	velocity		Axial distance	velocity		Axial distance	velocity		Axial distance	velocity		Axial distance	velocity
0.00115113	13.8857		0.00115113	13.9696		0.00115113	13.6811		0.00115113	13.181		0.00115113	12.9671		0.00115113	12.9249
0.00404502	13.908		0.00404502	13.9637		0.00404502	13.4768		0.00404502	12.8084		0.00404502	12.5728		0.00404502	12.5349
0.00693891	13.9126		0.00693891	13.9337		0.00693891	13.2283		0.00693891	12.3884		0.00693891	12.1304		0.00693891	12.0905
0.0098328	13.8994		0.0098328	13.8801		0.0098328	12.9385		0.0098328	11.9131		0.0098328	11.6231		0.0098328	11.5759
0.0127267	13.8673		0.0127267	13.8034		0.0127267	12.6077		0.0127267	11.3747		0.0127267	11.0412		0.0127267	10.9831
0.0156206	13.8184		0.0156206	13.7056		0.0156206	12.2363		0.0156206	10.7707		0.0156206	10.3836		0.0156206	10.3162
0.0185145	13.757		0.0185145	13.5917		0.0185145	11.8284		0.0185145	10.1052		0.0185145	9.65954		0.0185145	9.59527
0.0214084	13.6875		0.0214084	13.4661		0.0214084	11.3911		0.0214084	9.38799		0.0214084	8.88995		0.0214084	8.85071
0.0243023	13.6134		0.0243023	13.3342		0.0243023	10.9302		0.0243023	8.63237		0.0243023	8.10267		0.0243023	8.11176
0.0271961	13.5369		0.0271961	13.199		0.0271961	10.4498		0.0271961	7.85378		0.0271961	7.325		0.0271961	7.4022
0.03009	13.4621		0.03009	13.064		0.03009	9.95586		0.03009	7.07027		0.03009	6.57842		0.03009	6.73679
0.0329839	13.3926		0.0329839	12.9348		0.0329839	9.4542		0.0329839	6.29973		0.0329839	5.87522		0.0329839	6.12232
0.0358778	13.3286		0.0358778	12.8109		0.0358778	8.94752		0.0358778	5.55361		0.0358778	5.21784		0.0358778	5.55976
0.0387717	13.2693		0.0387717	12.6916		0.0387717	8.43787		0.0387717	4.8365		0.0387717	4.60134		0.0387717	5.0419
0.0416656	13.2149		0.0416656	12.578		0.0416656	7.92759		0.0416656	4.14923		0.0416656	4.01682		0.0416656	4.55769
0.0445595	13.1657		0.0445595	12.4707		0.0445595	7.41783		0.0445595	3.49245		0.0445595	3.45516		0.0445595	4.09571
0.0474534	13.1214		0.0474534	12.3695		0.0474534	6.90955		0.0474534	2.87048		0.0474534	2.91208		0.0474534	3.64516
0.0503473	13.0821		0.0503473	12.2738		0.0503473	6.40373		0.0503473	2.29201		0.0503473	2.39071		0.0503473	3.19836
0.0532412	13.048		0.0532412	12.1825		0.0532412	5.89979		0.0532412	1.76519		0.0532412	1.89939		0.0532412	2.75248
0.056135	13.0192		0.056135	12.0949		0.056135	5.39623		0.056135	1.29058		0.056135	1.4444		0.056135	2.31102
0.0590289	12.9949		0.0590289	12.0104		0.0590289	4.89114		0.0590289	0.843054		0.0590289	1.01587		0.0590289	1.88338
0.0619228	12.9744		0.0619228	11.9285		0.0619228	4.3818		0.0619228	0.39951		0.0619228	0.587942		0.0619228	1.47814
0.0648167	12.9579		0.0648167	11.8486		0.0648167	3.86633		0.0648167	-0.0272176		0.0648167	0.155514		0.0648167	1.09192
0.0677106	12.945		0.0677106	11.7703		0.0677106	3.34533		0.0677106	-0.392852		0.0677106	-0.243893		0.0677106	0.703291
0.0706045	12.9351		0.0706045	11.6941		0.0706045	2.82481		0.0706045	-0.659632		0.0706045	-0.562475		0.0706045	0.301515
0.0734984	12.9275		0.0734984	11.6199		0.0734984	2.31768		0.0734984	-0.835737		0.0734984	-0.788079		0.0734984	-0.0915729
0.0763923	12.9211		0.0763923	11.5476		0.0763923	1.83961		0.0763923	-0.953354		0.0763923	-0.946097		0.0763923	-0.433706
0.0792862	12.9155		0.0792862	11.4774		0.0792862	1.39807		0.0792862	-1.04027		0.0792862	-1.06651		0.0792862	-0.695482
0.0821801	12.9107		0.0821801	11.4095		0.0821801	0.98393		0.0821801	-1.11156		0.0821801	-1.16693		0.0821801	-0.88427
0.085074	12.9069		0.085074	11.3444		0.085074	0.577486		0.085074	-1.17463		0.085074	-1.2555		0.085074	-1.02547
0.085074	12.9069		0.085074	11.3444		0.085074	0.577486		0.085074	-1.17463		0.085074	-1.2555		0.085074	-1.02547
0.0879678	12.9038		0.0879678	11.2821		0.0879678	0.176609		0.0879678	-1.23376		0.0879678	-1.3361		0.0879678	-1.13981
0.0908617	12.9013		0.0908617	11.2224		0.0908617	-0.20019		0.0908617	-1.29141		0.0908617	-1.4108		0.0908617	-1.2379
0.0937556	12.8991		0.0937556	11.1652		0.0937556	-0.527984		0.0937556	-1.34875		0.0937556	-1.48119		0.0937556	-1.32492
0.0966495	12.8971		0.0966495	11.1102		0.0966495	-0.785761		0.0966495	-1.40659		0.0966495	-1.54844		0.0966495	-1.40374
0.0995434	12.8956		0.0995434	11.0576		0.0995434	-0.969242		0.0995434	-1.46545		0.0995434	-1.61324		0.0995434	-1.47621
0.102437	12.8947		0.102437	11.007		0.102437	-1.08777		0.102437	-1.52551		0.102437	-1.67603		0.102437	-1.54351
0.105331	12.8945		0.105331	10.9582		0.105331	-1.15994		0.105331	-1.58672		0.105331	-1.73703		0.105331	-1.60641
0.108225	12.8949		0.108225	10.9111		0.108225	-1.20443		0.108225	-1.64889		0.108225	-1.79634		0.108225	-1.66549
0.111119	12.8959		0.111119	10.8655		0.111119	-1.23448		0.111119	-1.71172		0.111119	-1.85394		0.111119	-1.72108
0.114013	12.8975		0.114013	10.8211		0.114013	-1.25845		0.114013	-1.7749		0.114013	-1.90977		0.114013	-1.77331
0.116907	12.8997		0.116907	10.7782		0.116907	-1.28089		0.116907	-1.83809		0.116907	-1.96364		0.116907	-1.82227
0.119801	12.9023		0.119801	10.7367		0.119801	-1.30451		0.119801	-1.9009		0.119801	-2.01534		0.119801	-1.86805
0.122695	12.9056		0.122695	10.6965		0.122695	-1.33078		0.122695	-1.96296		0.122695	-2.06469		0.122695	-1.91066
0.125588	12.9097		0.125588	10.6575		0.125588	-1.36043		0.125588	-2.02388		0.125588	-2.11147		0.125588	-1.95007
0.128482	12.9144		0.128482	10.6196		0.128482	-1.39371		0.128482	-2.08334		0.128482	-2.15553		0.128482	-1.98621
0.131376	12.9194		0.131376	10.5823		0.131376	-1.43064		0.131376	-2.14102		0.131376	-2.1967		0.131376	-2.01904
0.13427	12.9247		0.13427	10.5458		0.13427	-1.47116		0.13427	-2.19662		0.13427	-2.23488		0.13427	-2.04853
0.137164	12.9303		0.137164	10.5102		0.137164	-1.51513		0.137164	-2.24988		0.137164	-2.26994		0.137164	-2.07466
0.140058	12.9363		0.140058	10.4748		0.140058	-1.5623		0.140058	-2.30057		0.140058	-2.30183		0.140058	-2.09746
0.142952	12.9429		0.142952	10.4395		0.142952	-1.6124		0.142952	-2.34848		0.142952	-2.33047		0.142952	-2.11694
0.145846	12.95		0.145846	10.4052		0.145846	-1.66505		0.145846	-2.39343		0.145846	-2.35584		0.145846	-2.13315
0.14874	12.9567		0.14874	10.3724		0.14874	-1.71985		0.14874	-2.43529		0.14874	-2.37792		0.14874	-2.14615
0.151633	12.963		0.151633	10.3404		0.151633	-1.77641		0.151633	-2.47393		0.151633	-2.39671		0.151633	-2.15602
0.154527	12.9696		0.154527	10.309		0.154527	-1.83427		0.154527	-2.50926		0.154527	-2.41221		0.154527	-2.16274
0.157421	12.977		0.157421	10.2783		0.157421	-1.89297		0.157421	-2.5412		0.157421	-2.42452		0.157421	-2.16654
0.160315	12.9849		0.160315	10.248		0.160315	-1.95204		0.160315	-2.56969		0.160315	-2.43354		0.160315	-2.16763
0.163209	12.9926		0.163209	10.2179		0.163209	-2.01103		0.163209	-2.5947		0.163209	-2.43943		0.163209	-2.1656
0.166103	13.0001		0.166103	10.1886		0.166103	-2.06949		0.166103	-2.61622		0.166103	-2.44244		0.166103	-2.16095
0.166103	13.0001		0.166103	10.1886		0.166103	-2.06949		0.166103	-2.61622		0.166103	-2.44244		0.166103	-2.16095
0.168997	13.0078		0.168997	10.16		0.168997	-2.12703		0.168997	-2.63424		0.168997	-2.44231		0.168997	-2.15393
0.171891	13.0155		0.171891	10.1321		0.171891	-2.18324		0.171891	-2.64885		0.171891	-2.43918		0.171891	-2.14431
0.174785	13.0231		0.174785	10.1048		0.174785	-2.23779		0.174785	-2.65994		0.174785	-2.43333		0.174785	-2.13239
0.177678	13.0308		0.177678	10.078		0.177678	-2.29035		0.177678	-2.66759		0.177678	-2.42478		0.177678	-2.11823
0.180572	13.0386		0.180572	10.0516		0.180572	-2.34064		0.180572	-2.67207		0.180572	-2.4136		0.180572	-2.10198
0.183466	13.0464		0.183466	10.0257		0.183466	-2.38841		0.183466	-2.67333		0.183466	-2.39992		0.183466	-2.08374
0.18636	13.0541		0.18636	10.0001		0.18636	-2.43344		0.18636	-2.67111		0.18636	-2.38385		0.18636	-2.06364
0.189254	13.0618		0.189254	9.97504		0.189254	-2.47555		0.189254	-2.66586		0.189254	-2.3655		0.189254	-2.04179
0.192148	13.0697		0.192148	9.95047		0.192148	-2.51458		0.192148	-2.65778		0.192148	-2.34499		0.192148	-2.01832
0.195042	13.0776		0.195042	9.92645		0.195042	-2.5504		0.195042	-2.64666		0.195042	-2.32245		0.195042	-1.99335
0.197936	13.0856		0.197936	9.90292		0.197936	-2.5829		0.197936	-2.63279		0.197936	-2.29798		0.197936	-1.96697
0.20083	13.0936		0.20083	9.87988		0.20083	-2.612		0.20083	-2.61622		0.20083	-2.27172		0.20083	-1.93932
0.203723	13.1017		0.203723	9.85733		0.203723	-2.63764		0.203723	-2.5971		0.203723	-2.24377		0.203723	-1.9105
0.206617	13.1099		0.206617	9.83526		0.206617	-2.65976		0.206617	-2.57553		0.206617	-2.21426		0.206617	-1.88061
0.209511	13.1181		0.209511	9.81359		0.209511	-2.67834		0.209511	-2.55166		0.209511	-2.18331		0.209511	-1.84977
0.212405	13.1263		0.212405	9.79227		0.212405	-2.69335		0.212405	-2.52559		0.212405	-2.15103		0.212405	-1.81807
0.215299	13.1342		0.215299	9.77119		0.215299	-2.7048		0.215299	-2.49746		0.215299	-2.11752		0.215299	-1.7856
0.215299	13.1342		0.215299	9.77119		0.215299	-2.7048		0.215299	-2.49746		0.215299	-2.11752		0.215299	-1.7856
0.218193	13.1418		0.218193	9.75014		0.218193	-2.71272		0.218193	-2.4674		0.218193	-2.08291		0.218193	-1.75247
0.221087	13.1491		0.221087	9.72905		0.221087	-2.71726		0.221087	-2.43553		0.221087	-2.0473		0.221087	-1.71877
0.223981	13.1562		0.223981	9.70799		0.223981	-2.71847		0.223981	-2.40198		0.223981	-2.01079		0.223981	-1.68458
0.226875	13.1631		0.226875	9.68703		0.226875	-2.71601		0.226875	-2.36687		0.226875	-1.97347		0.226875	-1.64998
0.229768	13.1702		0.229768	9.66611		0.229768	-2.71033		0.229768	-2.33033		0.229768	-1.93546		0.229768	-1.61505
0.232662	13.1773		0.232662	9.64521		0.232662	-2.70161		0.232662	-2.29247		0.232662	-1.89684		0.232662	-1.57986
0.235556	13.1843		0.235556	9.62435		0.235556	-2.68968		0.235556	-2.25341		0.235556	-1.8577		0.235556	-1.5445
0.23845	13.191		0.23845	9.6035		0.23845	-2.67477		0.23845	-2.21327		0.23845	-1.81813		0.23845	-1.50902
0.241344	13.1976		0.241344	9.58257		0.241344	-2.65696		0.241344	-2.17215		0.241344	-1.77821		0.241344	-1.47349
0.244238	13.2038		0.244238	9.56152		0.244238	-2.63639		0.244238	-2.13017		0.244238	-1.73803		0.244238	-1.43798
0.247132	13.2096		0.247132	9.54035		0.247132	-2.61318		0.247132	-2.08742		0.247132	-1.69764		0.247132	-1.40252
0.250026	13.2151		0.250026	9.51905		0.250026	-2.58745		0.250026	-2.04401		0.250026	-1.65713		0.250026	-1.36718
0.25292	13.2202		0.25292	9.49769		0.25292	-2.55935		0.25292	-2.00003		0.25292	-1.61656		0.25292	-1.33201
0.255814	13.2248		0.255814	9.47637		0.255814	-2.52899		0.255814	-1.95558		0.255814	-1.57599		0.255814	-1.29705
0.258707	13.2291		0.258707	9.45509		0.258707	-2.49653		0.258707	-1.91074		0.258707	-1.5355		0.258707	-1.26235
0.261601	13.2331		0.261601	9.43377		0.261601	-2.46209		0.261601	-1.8656		0.261601	-1.49512		0.261601	-1.22793
0.264495	13.2369		0.264495	9.41243		0.264495	-2.42582		0.264495	-1.82023		0.264495	-1.45491		0.264495	-1.19385
0.267389	13.2404		0.267389	9.39114		0.267389	-2.38784		0.267389	-1.77472		0.267389	-1.41493		0.267389	-1.16012
0.270283	13.2435		0.270283	9.36978		0.270283	-2.34829		0.270283	-1.72913		0.270283	-1.37522		0.270283	-1.12678
0.273177	13.2462		0.273177	9.34826		0.273177	-2.30731		0.273177	-1.68353		0.273177	-1.33581		0.273177	-1.09386
0.276071	13.2484		0.276071	9.32663		0.276071	-2.26502		0.276071	-1.63799		0.276071	-1.29676		0.276071	-1.06138
0.278965	13.2498		0.278965	9.30492		0.278965	-2.22154		0.278965	-1.59257		0.278965	-1.2581		0.278965	-1.02936
0.281859	13.2507		0.281859	9.28309		0.281859	-2.177		0.281859	-1.54732		0.281859	-1.21986		0.281859	-0.997823
0.284752	13.251		0.284752	9.26116		0.284752	-2.13153		0.284752	-1.50229		0.284752	-1.18207		0.284752	-0.966781
0.287646	13.2509		0.287646	9.23931		0.287646	-2.08523		0.287646	-1.45755		0.287646	-1.14476		0.287646	-0.936249
0.29054	13.2502		0.29054	9.2175		0.29054	-2.03821		0.29054	-1.41313		0.29054	-1.10796		0.29054	-0.90624
0.293434	13.2487		0.293434	9.19533		0.293434	-1.99058		0.293434	-1.36908		0.293434	-1.07168		0.293434	-0.876763
0.296328	13.2465		0.296328	9.17248		0.296328	-1.94244		0.296328	-1.32543		0.296328	-1.03595		0.296328	-0.847827
0.299222	13.2435		0.299222	9.14898		0.299222	-1.8939		0.299222	-1.28223		0.299222	-1.00079		0.299222	-0.819436
0.302116	13.2396		0.302116	9.12498		0.302116	-1.84504		0.302116	-1.23951		0.302116	-0.966209		0.302116	-0.791595
0.30501	13.2349		0.30501	9.10052		0.30501	-1.79595		0.30501	-1.1973		0.30501	-0.932223		0.30501	-0.764306
0.307904	13.2296		0.307904	9.07552		0.307904	-1.74671		0.307904	-1.15562		0.307904	-0.898844		0.307904	-0.73757
0.310797	13.2236		0.310797	9.05		0.310797	-1.6974		0.310797	-1.11451		0.310797	-0.86608		0.310797	-0.711387
0.313691	13.2167		0.313691	9.0238		0.313691	-1.64811		0.313691	-1.07399		0.313691	-0.83394		0.313691	-0.685754
0.313691	13.2167		0.313691	9.0238		0.313691	-1.64811		0.313691	-1.07399		0.313691	-0.83394		0.313691	-0.685754
0.316585	13.2086		0.316585	8.99667		0.316585	-1.59889		0.316585	-1.03408		0.316585	-0.802429		0.316585	-0.660668
0.319479	13.1997		0.319479	8.96866		0.319479	-1.54981		0.319479	-0.994792		0.319479	-0.77155		0.319479	-0.636124
0.322373	13.19		0.322373	8.94003		0.322373	-1.50094		0.322373	-0.956151		0.322373	-0.741307		0.322373	-0.612118
0.325267	13.1794		0.325267	8.91104		0.325267	-1.45233		0.325267	-0.918168		0.325267	-0.711701		0.325267	-0.588642
0.328161	13.168		0.328161	8.88184		0.328161	-1.40404		0.328161	-0.880856		0.328161	-0.68273		0.328161	-0.565689
0.331055	13.1556		0.331055	8.85239		0.331055	-1.35611		0.331055	-0.844226		0.331055	-0.654393		0.331055	-0.54325
0.333949	13.1416		0.333949	8.82252		0.333949	-1.3086		0.333949	-0.808285		0.333949	-0.626687		0.333949	-0.521318
0.336842	13.1261		0.336842	8.79213		0.336842	-1.26154		0.336842	-0.773042		0.336842	-0.599607		0.336842	-0.499882
0.339736	13.1094		0.339736	8.76125		0.339736	-1.21497		0.339736	-0.738501		0.339736	-0.573149		0.339736	-0.478932
0.34263	13.0916		0.34263	8.72987		0.34263	-1.16893		0.34263	-0.704666		0.34263	-0.547304		0.34263	-0.458457
0.345524	13.0729		0.345524	8.69813		0.345524	-1.12345		0.345524	-0.671539		0.345524	-0.522067		0.345524	-0.438446
0.348418	13.0526		0.348418	8.6661		0.348418	-1.07856		0.348418	-0.639121		0.348418	-0.497429		0.348418	-0.418888
0.351312	13.0306		0.351312	8.63383		0.351312	-1.03428		0.351312	-0.607411		0.351312	-0.47338		0.351312	-0.399771
0.354206	13.0072		0.354206	8.6015		0.354206	-0.990649		0.354206	-0.576407		0.354206	-0.449911		0.354206	-0.381083
0.3571	12.9824		0.3571	8.5689		0.3571	-0.947677		0.3571	-0.546106		0.3571	-0.427012		0.3571	-0.362811
0.359994	12.9559		0.359994	8.53549		0.359994	-0.905386		0.359994	-0.516505		0.359994	-0.404671		0.359994	-0.344944
0.362887	12.9282		0.362887	8.50136		0.362887	-0.863792		0.362887	-0.487598		0.362887	-0.382878		0.362887	-0.32747
0.365781	12.8993		0.365781	8.46697		0.365781	-0.822909		0.365781	-0.459378		0.365781	-0.361619		0.365781	-0.310375
0.368675	12.8691		0.368675	8.43229		0.368675	-0.782748		0.368675	-0.431837		0.368675	-0.340883		0.368675	-0.293647
0.371569	12.8374		0.371569	8.39714		0.371569	-0.743319		0.371569	-0.404969		0.371569	-0.320655		0.371569	-0.277273
0.374463	12.8034		0.374463	8.36178		0.374463	-0.70463		0.374463	-0.378763		0.374463	-0.300923		0.374463	-0.26124
0.377357	12.7666		0.377357	8.32615		0.377357	-0.66669		0.377357	-0.35321		0.377357	-0.281674		0.377357	-0.245538
0.380251	12.7269		0.380251	8.28973		0.380251	-0.629502		0.380251	-0.328301		0.380251	-0.262894		0.380251	-0.230154
0.383145	12.6847		0.383145	8.25251		0.383145	-0.593072		0.383145	-0.304027		0.383145	-0.244573		0.383145	-0.215077
0.386039	12.6405		0.386039	8.2148		0.386039	-0.5574		0.386039	-0.280374		0.386039	-0.226694		0.386039	-0.200297
0.388932	12.5948		0.388932	8.17625		0.388932	-0.522486		0.388932	-0.257331		0.388932	-0.209245		0.388932	-0.1858
0.391826	12.5472		0.391826	8.13651		0.391826	-0.488329		0.391826	-0.234887		0.391826	-0.192212		0.391826	-0.171577
0.39472	12.4969		0.39472	8.09519		0.39472	-0.454927		0.39472	-0.213027		0.39472	-0.175582		0.39472	-0.157617
0.397614	12.4433		0.397614	8.05185		0.397614	-0.422277		0.397614	-0.19174		0.397614	-0.15934		0.397614	-0.143908
0.400508	12.3865		0.400508	8.00706		0.400508	-0.390375		0.400508	-0.171012		0.400508	-0.143474		0.400508	-0.130441
0.403402	12.3268		0.403402	7.96159		0.403402	-0.359215		0.403402	-0.150829		0.403402	-0.12797		0.403402	-0.117206
0.403402	12.3268		0.403402	7.96159		0.403402	-0.359215		0.403402	-0.150829		0.403402	-0.12797		0.403402	-0.117206
0.406296	12.2648		0.406296	7.91531		0.406296	-0.328791		0.406296	-0.131178		0.406296	-0.112816		0.406296	-0.104194
0.40919	12.2001		0.40919	7.86801		0.40919	-0.299095		0.40919	-0.112045		0.40919	-0.0979982		0.40919	-0.0913956
0.412084	12.1317		0.412084	7.81988		0.412084	-0.270121		0.412084	-0.093417		0.412084	-0.0835048		0.412084	-0.0788014
0.414977	12.0598		0.414977	7.77093		0.414977	-0.241859		0.414977	-0.075279		0.414977	-0.0693232		0.414977	-0.0664032
0.417871	11.9854		0.417871	7.72114		0.417871	-0.214301		0.417871	-0.0576174		0.417871	-0.0554414		0.417871	-0.0541927
0.420765	11.9068		0.420765	7.67099		0.420765	-0.187435		0.420765	-0.0404183		0.420765	-0.0418475		0.420765	-0.042162
0.423659	11.8229		0.423659	7.62068		0.423659	-0.161253		0.423659	-0.0236676		0.423659	-0.02853		0.423659	-0.0303036
0.426553	11.7358		0.426553	7.56983		0.426553	-0.135742		0.426553	-0.00735147		0.426553	-0.0154778		0.426553	-0.01861
0.429447	11.6469		0.429447	7.51855		0.429447	-0.110893		0.429447	0.00854382		0.429447	-0.00267981		0.429447	-0.00707439
0.432341	11.5558		0.432341	7.46725		0.432341	-0.0866916		0.432341	0.024032		0.432341	0.00987449		0.432341	0.00431005
0.435235	11.4621		0.435235	7.4156		0.435235	-0.0631272		0.435235	0.0391266		0.435235	0.0221955		0.435235	0.0155497
0.438129	11.3662		0.438129	7.36321		0.438129	-0.040187		0.438129	0.0538409		0.438129	0.034293		0.438129	0.0266508
0.441023	11.2687		0.441023	7.31052		0.441023	-0.0178584		0.441023	0.0681882		0.441023	0.046177		0.441023	0.0376192
0.443916	11.1699		0.443916	7.25791		0.443916	0.00387175		0.443916	0.0821814		0.443916	0.0578565		0.443916	0.0484604
0.44681	11.0699		0.44681	7.2051		0.44681	0.0250166		0.44681	0.0958333		0.44681	0.0693408		0.44681	0.05918
0.449704	10.9691		0.449704	7.15185		0.449704	0.0455895		0.449704	0.109156		0.449704	0.0806386		0.449704	0.069783
0.452598	10.8679		0.452598	7.09823		0.452598	0.0656039		0.452598	0.122163		0.452598	0.0917584		0.452598	0.0802745
0.455492	10.7666		0.455492	7.04417		0.455492	0.0850733		0.455492	0.134865		0.455492	0.102708		0.455492	0.0906593
0.458386	10.6651		0.458386	6.98958		0.458386	0.104011		0.458386	0.147275		0.458386	0.113496		0.458386	0.100942
0.46128	10.5637		0.46128	6.93446		0.46128	0.122432		0.46128	0.159403		0.46128	0.124129		0.46128	0.111127
0.464174	10.4621		0.464174	6.87885		0.464174	0.140348		0.464174	0.171262		0.464174	0.134616		0.464174	0.121218
0.467068	10.3599		0.467068	6.82279		0.467068	0.157774		0.467068	0.182862		0.467068	0.144962		0.467068	0.131219
0.469961	10.2567		0.469961	6.76639		0.469961	0.174723		0.469961	0.194214		0.469961	0.155175		0.469961	0.141135
0.472855	10.1532		0.472855	6.70972		0.472855	0.191208		0.472855	0.205328		0.472855	0.165261		0.472855	0.150969
0.475749	10.0501		0.475749	6.65267		0.475749	0.207244		0.475749	0.216214		0.475749	0.175227		0.475749	0.160725
0.478643	9.94729		0.478643	6.5952		0.478643	0.222843		0.478643	0.226883		0.478643	0.185078		0.478643	0.170406
0.481537	9.84444		0.481537	6.53738		0.481537	0.238019		0.481537	0.237343		0.481537	0.194821		0.481537	0.180015
0.484431	9.7414		0.484431	6.47924		0.484431	0.252784		0.484431	0.247605		0.484431	0.204461		0.484431	0.189557
0.487325	9.63845		0.487325	6.42082		0.487325	0.267151		0.487325	0.257677		0.487325	0.214003		0.487325	0.199033
0.490219	9.5359		0.490219	6.36221		0.490219	0.281134		0.490219	0.267568		0.490219	0.223453		0.490219	0.208448
0.493113	9.43388		0.493113	6.30334		0.493113	0.294745		0.493113	0.277286		0.493113	0.232816		0.493113	0.217805
0.496006	9.33235		0.496006	6.24409		0.496006	0.307996		0.496006	0.28684		0.496006	0.242096		0.496006	0.227106
0.4989	9.23108		0.4989	6.18449		0.4989	0.320899		0.4989	0.296238		0.4989	0.251299		0.4989	0.236354
0.501794	9.12986		0.501794	6.1247		0.501794	0.333467		0.501794	0.305487		0.501794	0.260429		0.501794	0.245553
0.504688	9.02878		0.504688	6.06487		0.504688	0.34571		0.504688	0.314596		0.504688	0.26949		0.504688	0.254706
0.507582	8.92801		0.507582	6.00504		0.507582	0.357642		0.507582	0.32357		0.507582	0.278488		0.507582	0.263814
0.510476	8.82769		0.510476	5.94524		0.510476	0.369272		0.510476	0.332418		0.510476	0.287425		0.510476	0.272882
0.51337	8.72798		0.51337	5.88549		0.51337	0.380612		0.51337	0.341147		0.51337	0.296307		0.51337	0.281912
0.516264	8.62897		0.516264	5.82576		0.516264	0.391674		0.516264	0.349762		0.516264	0.305138		0.516264	0.290908
0.519158	8.53067		0.519158	5.76604		0.519158	0.402468		0.519158	0.358272		0.519158	0.313922		0.519158	0.299872
0.522051	8.43286		0.522051	5.70635		0.522051	0.413005		0.522051	0.366683		0.522051	0.322663		0.522051	0.308809
0.524945	8.33526		0.524945	5.64658		0.524945	0.423295		0.524945	0.375001		0.524945	0.331365		0.524945	0.31772
0.524945	8.33526		0.524945	5.64658		0.524945	0.423295		0.524945	0.375001		0.524945	0.331365		0.524945	0.31772
0.527839	8.23787		0.527839	5.58668		0.527839	0.433347		0.527839	0.38323		0.527839	0.340031		0.527839	0.326608
0.530733	8.14084		0.530733	5.52678		0.530733	0.443171		0.530733	0.391378		0.530733	0.348666		0.530733	0.335477
0.533627	8.04431		0.533627	5.46697		0.533627	0.452778		0.533627	0.399449		0.533627	0.357272		0.533627	0.344331
0.536521	7.94834		0.536521	5.40731		0.536521	0.462176		0.536521	0.407451		0.536521	0.365854		0.536521	0.353171
0.539415	7.85296		0.539415	5.34781		0.539415	0.471375		0.539415	0.415388		0.539415	0.374416		0.539415	0.362002
0.542309	7.75821		0.542309	5.28853		0.542309	0.480384		0.542309	0.423266		0.542309	0.382962		0.542309	0.370827
0.545203	7.66413		0.545203	5.2295		0.545203	0.489212		0.545203	0.431091		0.545203	0.391495		0.545203	0.37965
0.548096	7.57075		0.548096	5.17076		0.548096	0.497868		0.548096	0.438867		0.548096	0.400021		0.548096	0.388474
0.55099	7.47805		0.55099	5.11232		0.55099	0.506359		0.55099	0.4466		0.55099	0.408541		0.55099	0.397303
0.553884	7.38607		0.553884	5.05422		0.553884	0.514695		0.553884	0.454295		0.553884	0.417062		0.553884	0.40614
0.556778	7.29486		0.556778	4.99647		0.556778	0.522884		0.556778	0.461957		0.556778	0.425585		0.556778	0.41499
0.559672	7.20443		0.559672	4.93912		0.559672	0.530933		0.559672	0.469593		0.559672	0.434116		0.559672	0.423857
0.562566	7.11471		0.562566	4.88217		0.562566	0.538851		0.562566	0.477205		0.562566	0.44266		0.562566	0.432744
0.56546	7.02574		0.56546	4.82563		0.56546	0.546646		0.56546	0.484801		0.56546	0.451219		0.56546	0.441655
0.568354	6.93763		0.568354	4.76951		0.568354	0.554325		0.568354	0.492384		0.568354	0.459799		0.568354	0.450595
0.571248	6.85041		0.571248	4.71384		0.571248	0.561896		0.571248	0.499961		0.571248	0.468404		0.571248	0.459568
0.574142	6.76402		0.574142	4.65866		0.574142	0.569366		0.574142	0.507536		0.574142	0.477038		0.574142	0.46858
0.577035	6.6784		0.577035	4.60397		0.577035	0.576743		0.577035	0.515115		0.577035	0.485706		0.577035	0.477634
0.579929	6.59353		0.579929	4.54977		0.579929	0.584035		0.579929	0.522702		0.579929	0.494414		0.579929	0.486736
0.582823	6.50943		0.582823	4.49607		0.582823	0.591248		0.582823	0.530305		0.582823	0.503165		0.582823	0.495893
0.585717	6.42616		0.585717	4.44286		0.585717	0.598391		0.585717	0.537927		0.585717	0.511965		0.585717	0.50511
0.588611	6.34379		0.588611	4.39017		0.588611	0.60547		0.588611	0.545574		0.588611	0.520819		0.588611	0.514395
0.591505	6.2623		0.591505	4.33799		0.591505	0.612493		0.591505	0.553253		0.591505	0.529733		0.591505	0.523751
0.594399	6.18164		0.594399	4.28633		0.594399	0.619467		0.594399	0.560969		0.594399	0.538713		0.594399	0.533185
0.597293	6.10178		0.597293	4.23524		0.597293	0.626399		0.597293	0.568728		0.597293	0.547765		0.597293	0.542698
0.600186	6.02272		0.600186	4.18472		0.600186	0.633298		0.600186	0.576536		0.600186	0.556897		0.600186	0.552294
0.60308	5.94443		0.60308	4.13479		0.60308	0.64017		0.60308	0.584399		0.60308	0.566117		0.60308	0.56198
0.605974	5.86697		0.605974	4.08541		0.605974	0.647023		0.605974	0.592324		0.605974	0.57543		0.605974	0.571763
0.608868	5.79041		0.608868	4.0366		0.608868	0.653866		0.608868	0.600317		0.608868	0.584842		0.608868	0.581651
0.611762	5.71478		0.611762	3.98834		0.611762	0.660704		0.611762	0.608386		0.611762	0.594358		0.611762	0.591651
0.614656	5.64005		0.614656	3.94063		0.614656	0.667548		0.614656	0.616538		0.614656	0.603983		0.614656	0.601772
0.61755	5.5662		0.61755	3.89352		0.61755	0.674404		0.61755	0.624781		0.61755	0.613722		0.61755	0.612021
0.620444	5.49319		0.620444	3.84702		0.620444	0.68128		0.620444	0.633125		0.620444	0.623586		0.620444	0.622406
0.623338	5.42102		0.623338	3.80113		0.623338	0.688186		0.623338	0.641579		0.623338	0.633583		0.623338	0.632935
0.626231	5.34968		0.626231	3.75586		0.626231	0.69513		0.626231	0.65015		0.626231	0.643723		0.626231	0.643615
0.629125	5.27917		0.629125	3.71121		0.629125	0.702122		0.629125	0.658845		0.629125	0.654016		0.629125	0.654455
0.632019	5.20946		0.632019	3.66716		0.632019	0.709171		0.632019	0.667673		0.632019	0.66447		0.632019	0.665464
0.634913	5.14057		0.634913	3.62373		0.634913	0.716289		0.634913	0.67664		0.634913	0.675096		0.634913	0.67665
0.637807	5.07252		0.637807	3.58092		0.637807	0.723486		0.637807	0.685755		0.637807	0.685902		0.637807	0.688024
0.640701	5.00537		0.640701	3.5387		0.640701	0.730771		0.640701	0.695031		0.640701	0.696899		0.640701	0.699594
0.643595	4.93909		0.643595	3.49709		0.643595	0.738155		0.643595	0.70448		0.643595	0.708099		0.643595	0.711372
0.643595	4.93909		0.643595	3.49709		0.643595	0.738155		0.643595	0.70448		0.643595	0.708099		0.643595	0.711372
0.646489	4.87366		0.646489	3.45609		0.646489	0.745647		0.646489	0.714114		0.646489	0.719511		0.646489	0.723367
0.649383	4.80908		0.649383	3.41569		0.649383	0.753258		0.649383	0.723945		0.649383	0.731147		0.649383	0.735591
0.652277	4.74533		0.652277	3.37591		0.652277	0.761		0.652277	0.733985		0.652277	0.743021		0.652277	0.748055
0.65517	4.68244		0.65517	3.33674		0.65517	0.768887		0.65517	0.744248		0.65517	0.755144		0.65517	0.76077
0.658064	4.6204		0.658064	3.2982		0.658064	0.776933		0.658064	0.754746		0.658064	0.767529		0.658064	0.77375
0.660958	4.55922		0.660958	3.26028		0.660958	0.785154		0.660958	0.765496		0.660958	0.780192		0.660958	0.787007
0.663852	4.49891		0.663852	3.22299		0.663852	0.793564		0.663852	0.77651		0.663852	0.793146		0.663852	0.800554
0.666746	4.43946		0.666746	3.18634		0.666746	0.80218		0.666746	0.787807		0.666746	0.806408		0.666746	0.814406
0.66964	4.38087		0.66964	3.15031		0.66964	0.811019		0.66964	0.799402		0.66964	0.819992		0.66964	0.828576
0.672534	4.32316		0.672534	3.11493		0.672534	0.820096		0.672534	0.811314		0.672534	0.833916		0.672534	0.843082
0.675428	4.26633		0.675428	3.0802		0.675428	0.829432		0.675428	0.823561		0.675428	0.848197		0.675428	0.857937
0.678322	4.21038		0.678322	3.04612		0.678322	0.839045		0.678322	0.836162		0.678322	0.862855		0.678322	0.873161
0.681215	4.15531		0.681215	3.0127		0.681215	0.848958		0.681215	0.849139		0.681215	0.877908		0.681215	0.888769
0.684109	4.10113		0.684109	2.97995		0.684109	0.859191		0.684109	0.862514		0.684109	0.893378		0.684109	0.904782
0.687003	4.04784		0.687003	2.94787		0.687003	0.869769		0.687003	0.876311		0.687003	0.909287		0.687003	0.921218
0.689897	3.99546		0.689897	2.91648		0.689897	0.880717		0.689897	0.890553		0.689897	0.925657		0.689897	0.938098
0.692791	3.944		0.692791	2.88579		0.692791	0.892061		0.692791	0.905269		0.692791	0.942513		0.692791	0.955444
0.695685	3.89346		0.695685	2.8558		0.695685	0.903831		0.695685	0.920485		0.695685	0.95988		0.695685	0.973278
0.698579	3.84386		0.698579	2.82654		0.698579	0.916056		0.698579	0.936232		0.698579	0.977787		0.698579	0.991625
0.701473	3.7952		0.701473	2.79802		0.701473	0.92877		0.701473	0.952542		0.701473	0.996262		0.701473	1.01051
0.704367	3.74752		0.704367	2.77027		0.704367	0.942006		0.704367	0.969447		0.704367	1.01533		0.704367	1.02996
0.70726	3.70082		0.70726	2.7433		0.70726	0.955804		0.70726	0.986986		0.70726	1.03504		0.70726	1.05001
0.710154	3.65512		0.710154	2.71714		0.710154	0.970201		0.710154	1.00519		0.710154	1.05541		0.710154	1.07068
0.713048	3.61046		0.713048	2.6918		0.713048	0.985243		0.713048	1.02412		0.713048	1.07648		0.713048	1.09201
0.715942	3.56686		0.715942	2.66732		0.715942	1.00097		0.715942	1.04379		0.715942	1.0983		0.715942	1.11403
0.715942	3.56686		0.715942	2.66732		0.715942	1.00097		0.715942	1.04379		0.715942	1.0983		0.715942	1.11403
0.718836	3.52436		0.718836	2.64372		0.718836	1.01745		0.718836	1.06427		0.718836	1.1209		0.718836	1.13678
0.72173	3.483		0.72173	2.62109		0.72173	1.03471		0.72173	1.08561		0.72173	1.14434		0.72173	1.1603
0.724624	3.44284		0.724624	2.59945		0.724624	1.05282		0.724624	1.10785		0.724624	1.16865		0.724624	1.18464
0.727518	3.4039		0.727518	2.57885		0.727518	1.07185		0.727518	1.13106		0.727518	1.19389		0.727518	1.20983
0.730412	3.36625		0.730412	2.55934		0.730412	1.09186		0.730412	1.15531		0.730412	1.22013		0.730412	1.23593
0.733305	3.32993		0.733305	2.54099		0.733305	1.11293		0.733305	1.18065		0.733305	1.24741		0.733305	1.26299
0.736199	3.29505		0.736199	2.52387		0.736199	1.13513		0.736199	1.20717		0.736199	1.27581		0.736199	1.29107
0.739093	3.26171		0.739093	2.50806		0.739093	1.15855		0.739093	1.23494		0.739093	1.30539		0.739093	1.32023
0.741987	3.22996		0.741987	2.49365		0.741987	1.18328		0.741987	1.26406		0.741987	1.33625		0.741987	1.35054
0.744881	3.19993		0.744881	2.48075		0.744881	1.20943		0.744881	1.29461		0.744881	1.36845		0.744881	1.38207
0.747775	3.17172		0.747775	2.46947		0.747775	1.23711		0.747775	1.32671		0.747775	1.40209		0.747775	1.41491
0.750669	3.14547		0.750669	2.45995		0.750669	1.26644		0.750669	1.36046		0.750669	1.43728		0.750669	1.44914
0.753563	3.12133		0.753563	2.45234		0.753563	1.29755		0.753563	1.396		0.753563	1.47412		0.753563	1.48485
0.756457	3.09948		0.756457	2.4468		0.756457	1.3306		0.756457	1.43346		0.756457	1.51274		0.756457	1.52216
0.75935	3.08011		0.75935	2.44352		0.75935	1.36575		0.75935	1.47299		0.75935	1.55327		0.75935	1.56118
0.762244	3.06345		0.762244	2.44277		0.762244	1.40318		0.762244	1.51476		0.762244	1.59586		0.762244	1.60203
0.765138	3.04977		0.765138	2.44478		0.765138	1.44308		0.765138	1.55896		0.765138	1.64067		0.765138	1.64487
0.768032	3.03935		0.768032	2.44983		0.768032	1.48569		0.768032	1.60579		0.768032	1.68788		0.768032	1.68983
0.770926	3.03251		0.770926	2.45826		0.770926	1.53125		0.770926	1.65549		0.770926	1.73768		0.770926	1.73711
0.77382	3.02967		0.77382	2.47045		0.77382	1.58004		0.77382	1.70829		0.77382	1.7903		0.77382	1.78688
0.776714	3.03127		0.776714	2.48681		0.776714	1.63236		0.776714	1.76448		0.776714	1.84597		0.776714	1.83935
0.779608	3.03777		0.779608	2.50782		0.779608	1.68855		0.779608	1.82435		0.779608	1.90495		0.779608	1.89475
0.782502	3.04974		0.782502	2.53403		0.782502	1.749		0.782502	1.88824		0.782502	1.96752		0.782502	1.95333
0.785396	3.0678		0.785396	2.56604		0.785396	1.81413		0.785396	1.95653		0.785396	2.03401		0.785396	2.01538
0.788289	3.09264		0.788289	2.60449		0.788289	1.88442		0.788289	2.02962		0.788289	2.10477		0.788289	2.0812
0.791183	3.12502		0.791183	2.65008		0.791183	1.96037		0.791183	2.10796		0.791183	2.1802		0.791183	2.15116
0.794077	3.16578		0.794077	2.70357		0.794077	2.04258		0.794077	2.19207		0.794077	2.26072		0.794077	2.22562
0.796971	3.2158		0.796971	2.76578		0.796971	2.1317		0.796971	2.28249		0.796971	2.34682		0.796971	2.30502
0.799865	3.27604		0.799865	2.83758		0.799865	2.22844		0.799865	2.37987		0.799865	2.43904		0.799865	2.38984
0.799865	3.27604		0.799865	2.83758		0.799865	2.22844		0.799865	2.37987		0.799865	2.43904		0.799865	2.38984
0.802759	3.34751		0.802759	2.91992		0.802759	2.33364		0.802759	2.4849		0.802759	2.53799		0.802759	2.48062
0.805653	3.43133		0.805653	3.01385		0.805653	2.4482		0.805653	2.59837		0.805653	2.64434		0.805653	2.57795
0.808547	3.52868		0.808547	3.12054		0.808547	2.57316		0.808547	2.72118		0.808547	2.75887		0.808547	2.68252
0.811441	3.64089		0.811441	3.24129		0.811441	2.70967		0.811441	2.85434		0.811441	2.88242		0.811441	2.79507
0.814334	3.76942		0.814334	3.3776		0.814334	2.85905		0.814334	2.99894		0.814334	3.01596		0.814334	2.91645
0.817228	3.91592		0.817228	3.53114		0.817228	3.02276		0.817228	3.15627		0.817228	3.16055		0.817228	3.04761
0.820122	4.08224		0.820122	3.70381		0.820122	3.20243		0.820122	3.3277		0.820122	3.31738		0.820122	3.18957
0.823016	4.27046		0.823016	3.89775		0.823016	3.39987		0.823016	3.51478		0.823016	3.48776		0.823016	3.34348
0.82591	4.48291		0.82591	4.11534		0.82591	3.6171		0.82591	3.71922		0.82591	3.67312		0.82591	3.51061
0.828804	4.72214		0.828804	4.35919		0.828804	3.8563		0.828804	3.94285		0.828804	3.87502		0.828804	3.6923
0.831698	4.99096		0.831698	4.63216		0.831698	4.11985		0.831698	4.18767		0.831698	4.09512		0.831698	3.89
0.834592	5.29233		0.834592	4.93726		0.834592	4.41028		0.834592	4.45577		0.834592	4.33515		0.834592	4.10521
0.837486	5.62934		0.837486	5.27765		0.837486	4.73025		0.837486	4.74931		0.837486	4.5969		0.837486	4.33945
0.840379	6.00511		0.840379	5.65654		0.840379	5.08245		0.840379	5.07047		0.840379	4.88212		0.840379	4.59422
0.843273	6.42264		0.843273	6.07702		0.843273	5.46951		0.843273	5.4213		0.843273	5.19243		0.843273	4.87088
0.846167	6.88463		0.846167	6.54195		0.846167	5.89388		0.846167	5.80363		0.846167	5.52923		0.846167	5.17057
0.849061	7.39326		0.849061	7.05368		0.849061	6.35758		0.849061	6.21886		0.849061	5.8935		0.849061	5.49402
0.851955	7.94994		0.851955	7.61386		0.851955	6.86206		0.851955	6.6678		0.851955	6.28565		0.851955	5.84147
0.854849	8.55494		0.854849	8.22302		0.854849	7.40774		0.854849	7.15032		0.854849	6.70524		0.854849	6.21235
0.857743	9.20739		0.857743	8.8806		0.857743	7.99413		0.857743	7.66537		0.857743	7.15098		0.857743	6.60534
0.860637	9.90429		0.860637	9.58386		0.860637	8.61866		0.860637	8.21009		0.860637	7.62003		0.860637	7.01773
0.863531	10.6426		0.863531	10.3301		0.863531	9.27886		0.863531	8.78158		0.863531	8.10943		0.863531	7.44666
0.866424	11.4131		0.866424	11.1102		0.866424	9.96604		0.866424	9.37181		0.866424	8.61199		0.866424	7.88566
0.869318	12.2193		0.869318	11.9285		0.869318	10.6843		0.869318	9.98334		0.869318	9.12929		0.869318	8.33581
0.872212	13.0309		0.872212	12.7529		0.872212	11.4024		0.872212	10.5902		0.872212	9.63976		0.872212	8.77855
0.875106	13.9318		0.875106	13.6715		0.875106	12.2023		0.875106	11.2601		0.875106	10.1997		0.875106	9.26235
0.878	14.4361		0.878	14.1878		0.878	12.6541		0.878	11.6368		0.878	10.5134		0.878	9.53293

## Sheet: Radial temp distribution
SN 0			SN 0.2			SN 0.4			SN 0.6			SN 0.8			SN 1
Radial distance	temperature		Radial distance	temperature		Radial distance	temperature		Radial distance	temperature		Radial distance	temperature		Radial distance	temperature
0	937.09		0	945.299		0	921.221		0	943.642		0	961.49		0	978.246
0.005	936.632		0.005	944.693		0.005	920.463		0.005	942.874		0.005	960.706		0.005	977.432
0.01	935.289		0.01	942.917		0.01	918.215		0.01	940.597		0.01	958.385		0.01	975.025
0.015	933.046		0.015	939.958		0.015	914.396		0.015	936.74		0.015	954.463		0.015	970.968
0.02	929.855		0.02	935.764		0.02	908.827		0.02	931.135		0.02	948.789		0.02	965.116
0.025	925.669		0.025	930.3		0.025	901.332		0.025	923.619		0.025	941.218		0.025	957.335
0.03	920.346		0.03	923.423		0.03	891.624		0.03	913.914		0.03	931.495		0.03	947.376
0.035	913.417		0.035	914.631		0.035	879.013		0.035	901.358		0.035	918.984		0.035	934.593
0.04	902.157		0.04	900.907		0.04	859.891		0.04	882.468		0.04	900.279		0.04	915.485
0.045	768.009		0.045	762.708		0.045	728.473		0.045	742.782		0.045	751.9		0.045	758.538

## Sheet: n2o distribution
SN 0			SN 0.2			SN 0.4			SN 0.6			SN 0.8			SN 1
Axial distance	n2o mass fraction		Axial distance	n2o mass fraction		Axial distance	n2o mass fraction		Axial distance	n2o mass fraction		Axial distance	n2o mass fraction		Axial distance	n2o mass fraction
0.00115113	2.6056e-10		0.00115113	2.63024e-10		0.00115113	1.07622e-10		0.00115113	2.90143e-11		0.00115113	2.04676e-11		0.00115113	1.02406e-11
0.00404502	3.70489e-10		0.00404502	3.76707e-10		0.00404502	1.25143e-10		0.00404502	3.93137e-11		0.00404502	2.26949e-11		0.00404502	1.12614e-11
0.00693891	5.03683e-10		0.00693891	5.12135e-10		0.00693891	1.39134e-10		0.00693891	4.94596e-11		0.00693891	2.44315e-11		0.00693891	1.19417e-11
0.0098328	6.53605e-10		0.0098328	6.59086e-10		0.0098328	1.50775e-10		0.0098328	5.87785e-11		0.0098328	2.55329e-11		0.0098328	1.21967e-11
0.0127267	8.14304e-10		0.0127267	8.08651e-10		0.0127267	1.61985e-10		0.0127267	6.63571e-11		0.0127267	2.59727e-11		0.0127267	1.19229e-11
0.0156206	9.7802e-10		0.0156206	9.50427e-10		0.0156206	1.75389e-10		0.0156206	7.17957e-11		0.0156206	2.5723e-11		0.0156206	1.11712e-11
0.0185145	1.13503e-09		0.0185145	1.07351e-09		0.0185145	1.91959e-10		0.0185145	7.46228e-11		0.0185145	2.48973e-11		0.0185145	1.01504e-11
0.0214084	1.27614e-09		0.0214084	1.16972e-09		0.0214084	2.10671e-10		0.0214084	7.47184e-11		0.0214084	2.35473e-11		0.0214084	9.09371e-12
0.0243023	1.39439e-09		0.0243023	1.23506e-09		0.0243023	2.29374e-10		0.0243023	7.24843e-11		0.0243023	2.17788e-11		0.0243023	8.30978e-12
0.0271961	1.48458e-09		0.0271961	1.26939e-09		0.0271961	2.45857e-10		0.0271961	6.82619e-11		0.0271961	2.0015e-11		0.0271961	8.09616e-12
0.03009	1.54484e-09		0.03009	1.27567e-09		0.03009	2.58691e-10		0.03009	6.28625e-11		0.03009	1.87185e-11		0.03009	8.68561e-12
0.0329839	1.57628e-09		0.0329839	1.25936e-09		0.0329839	2.67382e-10		0.0329839	5.72006e-11		0.0329839	1.86408e-11		0.0329839	1.02972e-11
0.0358778	1.58173e-09		0.0358778	1.22645e-09		0.0358778	2.72079e-10		0.0358778	5.25844e-11		0.0358778	2.1105e-11		0.0358778	1.31356e-11
0.0387717	1.5657e-09		0.0387717	1.18216e-09		0.0387717	2.7394e-10		0.0387717	5.18194e-11		0.0387717	2.87896e-11		0.0387717	1.747e-11
0.0416656	1.53304e-09		0.0416656	1.13157e-09		0.0416656	2.72922e-10		0.0416656	6.27532e-11		0.0416656	4.84159e-11		0.0416656	2.38953e-11
0.0445595	1.48807e-09		0.0445595	1.07933e-09		0.0445595	2.68595e-10		0.0445595	1.05871e-10		0.0445595	9.51781e-11		0.0445595	3.41063e-11
0.0474534	1.43489e-09		0.0474534	1.02966e-09		0.0474534	2.62346e-10		0.0474534	2.3595e-10		0.0474534	2.09377e-10		0.0474534	5.28079e-11
0.0503473	1.37705e-09		0.0503473	9.86365e-10		0.0503473	2.54272e-10		0.0503473	5.64673e-10		0.0503473	4.59873e-10		0.0503473	9.32529e-11
0.0532412	1.3177e-09		0.0532412	9.52699e-10		0.0532412	2.43903e-10		0.0532412	1.28823e-09		0.0532412	9.91536e-10		0.0532412	1.86545e-10
0.056135	1.25962e-09		0.056135	9.30678e-10		0.056135	2.31931e-10		0.056135	2.83601e-09		0.056135	2.10815e-09		0.056135	3.91419e-10
0.0590289	1.20532e-09		0.0590289	9.2062e-10		0.0590289	2.19196e-10		0.0590289	5.9754e-09		0.0590289	4.35376e-09		0.0590289	8.20977e-10
0.0619228	1.15689e-09		0.0619228	9.21347e-10		0.0619228	2.06773e-10		0.0619228	1.16727e-08		0.0619228	8.53329e-09		0.0619228	1.69904e-09
0.0648167	1.11605e-09		0.0648167	9.31258e-10		0.0648167	1.976e-10		0.0648167	2.04572e-08		0.0648167	1.53512e-08		0.0648167	3.40927e-09
0.0677106	1.08399e-09		0.0677106	9.48915e-10		0.0677106	2.00423e-10		0.0677106	3.15018e-08		0.0677106	2.45613e-08		0.0677106	6.49995e-09
0.0706045	1.06148e-09		0.0706045	9.7281e-10		0.0706045	2.40918e-10		0.0706045	4.25473e-08		0.0706045	3.44186e-08		0.0706045	1.15263e-08
0.0734984	1.04887e-09		0.0734984	1.00097e-09		0.0734984	3.83519e-10		0.0734984	4.72767e-08		0.0734984	3.96366e-08		0.0734984	1.86017e-08
0.0763923	1.04596e-09		0.0763923	1.03136e-09		0.0763923	7.59603e-10		0.0763923	4.38284e-08		0.0763923	3.74142e-08		0.0763923	2.70142e-08
0.0792862	1.05202e-09		0.0792862	1.06216e-09		0.0792862	1.6004e-09		0.0792862	3.77229e-08		0.0792862	3.19894e-08		0.0792862	3.52438e-08
0.0821801	1.06625e-09		0.0821801	1.09176e-09		0.0821801	3.26099e-09		0.0821801	3.19791e-08		0.0821801	2.70538e-08		0.0821801	3.80571e-08
0.085074	1.088e-09		0.085074	1.11891e-09		0.085074	6.19206e-09		0.085074	2.7105e-08		0.085074	2.31801e-08		0.085074	3.47441e-08
0.085074	1.088e-09		0.085074	1.11891e-09		0.085074	6.19206e-09		0.085074	2.7105e-08		0.085074	2.31801e-08		0.085074	3.47441e-08
0.0879678	1.11665e-09		0.0879678	1.1427e-09		0.0879678	1.08141e-08		0.0879678	2.31167e-08		0.0879678	2.01495e-08		0.0879678	3.02919e-08
0.0908617	1.15177e-09		0.0908617	1.16274e-09		0.0908617	1.73181e-08		0.0908617	1.99234e-08		0.0908617	1.77594e-08		0.0908617	2.6373e-08
0.0937556	1.19139e-09		0.0937556	1.17891e-09		0.0937556	2.55145e-08		0.0937556	1.72986e-08		0.0937556	1.58689e-08		0.0937556	2.32293e-08
0.0966495	1.23431e-09		0.0966495	1.19131e-09		0.0966495	3.48549e-08		0.0966495	1.51402e-08		0.0966495	1.43772e-08		0.0966495	2.0768e-08
0.0995434	1.279e-09		0.0995434	1.20039e-09		0.0995434	4.45116e-08		0.0995434	1.33801e-08		0.0995434	1.31896e-08		0.0995434	1.88658e-08
0.102437	1.32442e-09		0.102437	1.20674e-09		0.102437	5.23044e-08		0.102437	1.19387e-08		0.102437	1.22411e-08		0.102437	1.73923e-08
0.105331	1.36949e-09		0.105331	1.21106e-09		0.105331	5.42858e-08		0.105331	1.07572e-08		0.105331	1.14837e-08		0.105331	1.62404e-08
0.108225	1.41302e-09		0.108225	1.21417e-09		0.108225	5.03404e-08		0.108225	9.78918e-09		0.108225	1.088e-08		0.108225	1.53414e-08
0.111119	1.45423e-09		0.111119	1.21697e-09		0.111119	4.40488e-08		0.111119	8.99911e-09		0.111119	1.03996e-08		0.111119	1.4639e-08
0.114013	1.49188e-09		0.114013	1.22017e-09		0.114013	3.74942e-08		0.114013	8.35652e-09		0.114013	1.0018e-08		0.114013	1.40896e-08
0.116907	1.52672e-09		0.116907	1.22448e-09		0.116907	3.155e-08		0.116907	7.83359e-09		0.116907	9.71633e-09		0.116907	1.36602e-08
0.119801	1.55795e-09		0.119801	1.23074e-09		0.119801	2.64957e-08		0.119801	7.40952e-09		0.119801	9.47917e-09		0.119801	1.33255e-08
0.122695	1.58482e-09		0.122695	1.23988e-09		0.122695	2.23359e-08		0.122695	7.06851e-09		0.122695	9.29354e-09		0.122695	1.30666e-08
0.125588	1.60938e-09		0.125588	1.25264e-09		0.125588	1.89502e-08		0.125588	6.79704e-09		0.125588	9.14857e-09		0.125588	1.28669e-08
0.128482	1.63121e-09		0.128482	1.26885e-09		0.128482	1.61891e-08		0.128482	6.58177e-09		0.128482	9.03534e-09		0.128482	1.27121e-08
0.131376	1.64842e-09		0.131376	1.28814e-09		0.131376	1.3931e-08		0.131376	6.41123e-09		0.131376	8.94663e-09		0.131376	1.25911e-08
0.13427	1.66143e-09		0.13427	1.31001e-09		0.13427	1.20802e-08		0.13427	6.27732e-09		0.13427	8.87665e-09		0.13427	1.24954e-08
0.137164	1.67083e-09		0.137164	1.33433e-09		0.137164	1.05645e-08		0.137164	6.17309e-09		0.137164	8.82083e-09		0.137164	1.24185e-08
0.140058	1.67702e-09		0.140058	1.36155e-09		0.140058	9.32148e-09		0.140058	6.0926e-09		0.140058	8.77561e-09		0.140058	1.23552e-08
0.142952	1.68042e-09		0.142952	1.392e-09		0.142952	8.30217e-09		0.142952	6.0309e-09		0.142952	8.73825e-09		0.142952	1.23019e-08
0.145846	1.68165e-09		0.145846	1.42571e-09		0.145846	7.47121e-09		0.145846	5.98387e-09		0.145846	8.70668e-09		0.145846	1.22557e-08
0.14874	1.68111e-09		0.14874	1.46163e-09		0.14874	6.79109e-09		0.14874	5.94818e-09		0.14874	8.67932e-09		0.14874	1.22147e-08
0.151633	1.67923e-09		0.151633	1.49919e-09		0.151633	6.22767e-09		0.151633	5.92114e-09		0.151633	8.65504e-09		0.151633	1.21773e-08
0.154527	1.67646e-09		0.154527	1.53749e-09		0.154527	5.76145e-09		0.154527	5.90066e-09		0.154527	8.63301e-09		0.154527	1.21425e-08
0.157421	1.67318e-09		0.157421	1.57578e-09		0.157421	5.37739e-09		0.157421	5.88512e-09		0.157421	8.61261e-09		0.157421	1.21095e-08
0.160315	1.66979e-09		0.160315	1.6144e-09		0.160315	5.06245e-09		0.160315	5.8733e-09		0.160315	8.59383e-09		0.160315	1.20778e-08
0.163209	1.66664e-09		0.163209	1.65315e-09		0.163209	4.807e-09		0.163209	5.86427e-09		0.163209	8.57672e-09		0.163209	1.20473e-08
0.166103	1.6645e-09		0.166103	1.69245e-09		0.166103	4.60216e-09		0.166103	5.85732e-09		0.166103	8.56102e-09		0.166103	1.20178e-08
0.166103	1.6645e-09		0.166103	1.69245e-09		0.166103	4.60216e-09		0.166103	5.85732e-09		0.166103	8.56102e-09		0.166103	1.20178e-08
0.168997	1.66433e-09		0.168997	1.73297e-09		0.168997	4.43711e-09		0.168997	5.85078e-09		0.168997	8.54499e-09		0.168997	1.19873e-08
0.171891	1.66611e-09		0.171891	1.77405e-09		0.171891	4.30281e-09		0.171891	5.8434e-09		0.171891	8.52738e-09		0.171891	1.19545e-08
0.174785	1.66941e-09		0.174785	1.81544e-09		0.174785	4.19429e-09		0.174785	5.83525e-09		0.174785	8.50866e-09		0.174785	1.19198e-08
0.177678	1.67422e-09		0.177678	1.8574e-09		0.177678	4.10713e-09		0.177678	5.82634e-09		0.177678	8.48908e-09		0.177678	1.18836e-08
0.180572	1.6805e-09		0.180572	1.89952e-09		0.180572	4.03744e-09		0.180572	5.81673e-09		0.180572	8.4688e-09		0.180572	1.18459e-08
0.183466	1.68823e-09		0.183466	1.94127e-09		0.183466	3.98187e-09		0.183466	5.80643e-09		0.183466	8.44793e-09		0.183466	1.18069e-08
0.18636	1.69781e-09		0.18636	1.98237e-09		0.18636	3.93756e-09		0.18636	5.79551e-09		0.18636	8.42652e-09		0.18636	1.17666e-08
0.189254	1.70977e-09		0.189254	2.02281e-09		0.189254	3.90213e-09		0.189254	5.784e-09		0.189254	8.40461e-09		0.189254	1.17251e-08
0.192148	1.72381e-09		0.192148	2.06253e-09		0.192148	3.87364e-09		0.192148	5.77194e-09		0.192148	8.38223e-09		0.192148	1.16825e-08
0.195042	1.73937e-09		0.195042	2.10161e-09		0.195042	3.85051e-09		0.195042	5.75939e-09		0.195042	8.35938e-09		0.195042	1.16388e-08
0.197936	1.75658e-09		0.197936	2.14029e-09		0.197936	3.83148e-09		0.197936	5.74639e-09		0.197936	8.33607e-09		0.197936	1.15941e-08
0.20083	1.77572e-09		0.20083	2.17843e-09		0.20083	3.81557e-09		0.20083	5.73298e-09		0.20083	8.31228e-09		0.20083	1.15484e-08
0.203723	1.79699e-09		0.203723	2.21604e-09		0.203723	3.80201e-09		0.203723	5.71918e-09		0.203723	8.28801e-09		0.203723	1.15018e-08
0.206617	1.82044e-09		0.206617	2.25391e-09		0.206617	3.79021e-09		0.206617	5.70501e-09		0.206617	8.26322e-09		0.206617	1.14542e-08
0.209511	1.84615e-09		0.209511	2.29294e-09		0.209511	3.77973e-09		0.209511	5.6905e-09		0.209511	8.23785e-09		0.209511	1.14057e-08
0.212405	1.87417e-09		0.212405	2.33392e-09		0.212405	3.77019e-09		0.212405	5.67563e-09		0.212405	8.21181e-09		0.212405	1.13562e-08
0.215299	1.90457e-09		0.215299	2.37759e-09		0.215299	3.76127e-09		0.215299	5.66038e-09		0.215299	8.18495e-09		0.215299	1.13053e-08
0.215299	1.90457e-09		0.215299	2.37759e-09		0.215299	3.76127e-09		0.215299	5.66038e-09		0.215299	8.18495e-09		0.215299	1.13053e-08
0.218193	1.93764e-09		0.218193	2.42511e-09		0.218193	3.75272e-09		0.218193	5.64488e-09		0.218193	8.15743e-09		0.218193	1.12535e-08
0.221087	1.97369e-09		0.221087	2.47756e-09		0.221087	3.74436e-09		0.221087	5.62935e-09		0.221087	8.1296e-09		0.221087	1.12015e-08
0.223981	2.01279e-09		0.223981	2.53548e-09		0.223981	3.73605e-09		0.223981	5.61387e-09		0.223981	8.10151e-09		0.223981	1.11494e-08
0.226875	2.05491e-09		0.226875	2.59898e-09		0.226875	3.72772e-09		0.226875	5.59845e-09		0.226875	8.07311e-09		0.226875	1.1097e-08
0.229768	2.09988e-09		0.229768	2.66878e-09		0.229768	3.71934e-09		0.229768	5.58307e-09		0.229768	8.0443e-09		0.229768	1.10443e-08
0.232662	2.14804e-09		0.232662	2.74614e-09		0.232662	3.71088e-09		0.232662	5.56771e-09		0.232662	8.01497e-09		0.232662	1.09924e-08
0.235556	2.19897e-09		0.235556	2.83181e-09		0.235556	3.70234e-09		0.235556	5.55235e-09		0.235556	7.985e-09		0.235556	1.09418e-08
0.23845	2.25197e-09		0.23845	2.92582e-09		0.23845	3.6937e-09		0.23845	5.53696e-09		0.23845	7.95431e-09		0.23845	1.08926e-08
0.241344	2.30729e-09		0.241344	3.02869e-09		0.241344	3.68497e-09		0.241344	5.52154e-09		0.241344	7.92345e-09		0.241344	1.08444e-08
0.244238	2.3649e-09		0.244238	3.14162e-09		0.244238	3.67614e-09		0.244238	5.50608e-09		0.244238	7.8929e-09		0.244238	1.07973e-08
0.247132	2.42486e-09		0.247132	3.26532e-09		0.247132	3.66722e-09		0.247132	5.49058e-09		0.247132	7.86253e-09		0.247132	1.07513e-08
0.250026	2.48701e-09		0.250026	3.39986e-09		0.250026	3.65821e-09		0.250026	5.47506e-09		0.250026	7.8323e-09		0.250026	1.07063e-08
0.25292	2.55143e-09		0.25292	3.54577e-09		0.25292	3.64911e-09		0.25292	5.45954e-09		0.25292	7.8022e-09		0.25292	1.06624e-08
0.255814	2.61882e-09		0.255814	3.70426e-09		0.255814	3.63992e-09		0.255814	5.44403e-09		0.255814	7.77221e-09		0.255814	1.06194e-08
0.258707	2.68957e-09		0.258707	3.87551e-09		0.258707	3.63065e-09		0.258707	5.42857e-09		0.258707	7.74232e-09		0.258707	1.05776e-08
0.261601	2.7638e-09		0.261601	4.06007e-09		0.261601	3.6213e-09		0.261601	5.41321e-09		0.261601	7.71253e-09		0.261601	1.05369e-08
0.264495	2.84165e-09		0.264495	4.25911e-09		0.264495	3.61188e-09		0.264495	5.39784e-09		0.264495	7.68286e-09		0.264495	1.04974e-08
0.267389	2.92345e-09		0.267389	4.47273e-09		0.267389	3.60237e-09		0.267389	5.38231e-09		0.267389	7.6533e-09		0.267389	1.04592e-08
0.270283	3.00999e-09		0.270283	4.70085e-09		0.270283	3.5928e-09		0.270283	5.36656e-09		0.270283	7.62388e-09		0.270283	1.04225e-08
0.273177	3.1022e-09		0.273177	4.94421e-09		0.273177	3.58316e-09		0.273177	5.35059e-09		0.273177	7.59461e-09		0.273177	1.03873e-08
0.276071	3.2011e-09		0.276071	5.20418e-09		0.276071	3.57345e-09		0.276071	5.33444e-09		0.276071	7.56551e-09		0.276071	1.03539e-08
0.278965	3.30799e-09		0.278965	5.48096e-09		0.278965	3.56367e-09		0.278965	5.3181e-09		0.278965	7.5366e-09		0.278965	1.03225e-08
0.281859	3.42424e-09		0.281859	5.77446e-09		0.281859	3.55383e-09		0.281859	5.30161e-09		0.281859	7.5079e-09		0.281859	1.02911e-08
0.284752	3.55071e-09		0.284752	6.08463e-09		0.284752	3.54392e-09		0.284752	5.28495e-09		0.284752	7.47944e-09		0.284752	1.02579e-08
0.287646	3.68843e-09		0.287646	6.41106e-09		0.287646	3.53395e-09		0.287646	5.26815e-09		0.287646	7.45126e-09		0.287646	1.02231e-08
0.29054	3.83875e-09		0.29054	6.75403e-09		0.29054	3.52391e-09		0.29054	5.25119e-09		0.29054	7.42341e-09		0.29054	1.01868e-08
0.293434	4.00268e-09		0.293434	7.11461e-09		0.293434	3.51381e-09		0.293434	5.23409e-09		0.293434	7.39596e-09		0.293434	1.01489e-08
0.296328	4.18121e-09		0.296328	7.49389e-09		0.296328	3.50363e-09		0.296328	5.21684e-09		0.296328	7.369e-09		0.296328	1.01095e-08
0.299222	4.37558e-09		0.299222	7.89229e-09		0.299222	3.49338e-09		0.299222	5.19946e-09		0.299222	7.3426e-09		0.299222	1.00685e-08
0.302116	4.58714e-09		0.302116	8.31039e-09		0.302116	3.48304e-09		0.302116	5.18193e-09		0.302116	7.31563e-09		0.302116	1.0026e-08
0.30501	4.81724e-09		0.30501	8.7494e-09		0.30501	3.47261e-09		0.30501	5.16426e-09		0.30501	7.28699e-09		0.30501	9.98188e-09
0.307904	5.06701e-09		0.307904	9.21127e-09		0.307904	3.46208e-09		0.307904	5.14645e-09		0.307904	7.25676e-09		0.307904	9.93617e-09
0.310797	5.3373e-09		0.310797	9.69851e-09		0.310797	3.45142e-09		0.310797	5.12851e-09		0.310797	7.22496e-09		0.310797	9.88883e-09
0.313691	5.62964e-09		0.313691	1.0214e-08		0.313691	3.4406e-09		0.313691	5.11044e-09		0.313691	7.19162e-09		0.313691	9.83986e-09
0.313691	5.62964e-09		0.313691	1.0214e-08		0.313691	3.4406e-09		0.313691	5.11044e-09		0.313691	7.19162e-09		0.313691	9.83986e-09
0.316585	5.9453e-09		0.316585	1.0762e-08		0.316585	3.42955e-09		0.316585	5.09215e-09		0.316585	7.15768e-09		0.316585	9.78956e-09
0.319479	6.28472e-09		0.319479	1.13471e-08		0.319479	3.41838e-09		0.319479	5.07358e-09		0.319479	7.12395e-09		0.319479	9.73821e-09
0.322373	6.64883e-09		0.322373	1.19729e-08		0.322373	3.40727e-09		0.322373	5.05476e-09		0.322373	7.0903e-09		0.322373	9.68572e-09
0.325267	7.03876e-09		0.325267	1.26422e-08		0.325267	3.3962e-09		0.325267	5.0357e-09		0.325267	7.05663e-09		0.325267	9.63257e-09
0.328161	7.4558e-09		0.328161	1.33576e-08		0.328161	3.38519e-09		0.328161	5.0164e-09		0.328161	7.02287e-09		0.328161	9.57924e-09
0.331055	7.90147e-09		0.331055	1.41228e-08		0.331055	3.37424e-09		0.331055	4.99688e-09		0.331055	6.98896e-09		0.331055	9.52571e-09
0.333949	8.37762e-09		0.333949	1.49409e-08		0.333949	3.36336e-09		0.333949	4.97711e-09		0.333949	6.95489e-09		0.333949	9.47201e-09
0.336842	8.88654e-09		0.336842	1.58149e-08		0.336842	3.35253e-09		0.336842	4.95709e-09		0.336842	6.92061e-09		0.336842	9.41814e-09
0.339736	9.43173e-09		0.339736	1.67485e-08		0.339736	3.34177e-09		0.339736	4.93697e-09		0.339736	6.88609e-09		0.339736	9.36412e-09
0.34263	1.00166e-08		0.34263	1.77457e-08		0.34263	3.33106e-09		0.34263	4.91694e-09		0.34263	6.8513e-09		0.34263	9.30995e-09
0.345524	1.06447e-08		0.345524	1.88102e-08		0.345524	3.32042e-09		0.345524	4.897e-09		0.345524	6.81619e-09		0.345524	9.25564e-09
0.348418	1.1321e-08		0.348418	1.99483e-08		0.348418	3.30984e-09		0.348418	4.87718e-09		0.348418	6.7807e-09		0.348418	9.2012e-09
0.351312	1.2051e-08		0.351312	2.11692e-08		0.351312	3.29932e-09		0.351312	4.85749e-09		0.351312	6.74473e-09		0.351312	9.14663e-09
0.354206	1.28411e-08		0.354206	2.24819e-08		0.354206	3.28886e-09		0.354206	4.83794e-09		0.354206	6.70877e-09		0.354206	9.09192e-09
0.3571	1.36978e-08		0.3571	2.38966e-08		0.3571	3.27847e-09		0.3571	4.81853e-09		0.3571	6.67339e-09		0.3571	9.03707e-09
0.359994	1.46257e-08		0.359994	2.54248e-08		0.359994	3.26814e-09		0.359994	4.79927e-09		0.359994	6.63868e-09		0.359994	8.98205e-09
0.362887	1.56286e-08		0.362887	2.70777e-08		0.362887	3.25787e-09		0.362887	4.78018e-09		0.362887	6.60469e-09		0.362887	8.92687e-09
0.365781	1.67106e-08		0.365781	2.88702e-08		0.365781	3.24768e-09		0.365781	4.76127e-09		0.365781	6.57147e-09		0.365781	8.87212e-09
0.368675	1.78761e-08		0.368675	3.0827e-08		0.368675	3.23757e-09		0.368675	4.74254e-09		0.368675	6.53905e-09		0.368675	8.81839e-09
0.371569	1.91289e-08		0.371569	3.29937e-08		0.371569	3.22753e-09		0.371569	4.724e-09		0.371569	6.50748e-09		0.371569	8.7657e-09
0.374463	2.04729e-08		0.374463	3.54046e-08		0.374463	3.21757e-09		0.374463	4.70567e-09		0.374463	6.47679e-09		0.374463	8.71409e-09
0.377357	2.19156e-08		0.377357	3.80886e-08		0.377357	3.2077e-09		0.377357	4.68755e-09		0.377357	6.44701e-09		0.377357	8.6636e-09
0.380251	2.34668e-08		0.380251	4.11551e-08		0.380251	3.19793e-09		0.380251	4.66964e-09		0.380251	6.41819e-09		0.380251	8.61428e-09
0.383145	2.51347e-08		0.383145	4.46765e-08		0.383145	3.18824e-09		0.383145	4.65194e-09		0.383145	6.39037e-09		0.383145	8.56615e-09
0.386039	2.69311e-08		0.386039	4.87198e-08		0.386039	3.17864e-09		0.386039	4.63445e-09		0.386039	6.36358e-09		0.386039	8.51925e-09
0.388932	2.88765e-08		0.388932	5.34518e-08		0.388932	3.16914e-09		0.388932	4.61717e-09		0.388932	6.33785e-09		0.388932	8.47358e-09
0.391826	3.09959e-08		0.391826	5.91292e-08		0.391826	3.15974e-09		0.391826	4.60008e-09		0.391826	6.31323e-09		0.391826	8.42914e-09
0.39472	3.33084e-08		0.39472	6.60458e-08		0.39472	3.15042e-09		0.39472	4.58315e-09		0.39472	6.28976e-09		0.39472	8.38591e-09
0.397614	3.58247e-08		0.397614	7.41954e-08		0.397614	3.1412e-09		0.397614	4.56638e-09		0.397614	6.26753e-09		0.397614	8.34387e-09
0.400508	3.85656e-08		0.400508	8.32392e-08		0.400508	3.13206e-09		0.400508	4.54973e-09		0.400508	6.24661e-09		0.400508	8.30308e-09
0.403402	4.15821e-08		0.403402	9.2491e-08		0.403402	3.12302e-09		0.403402	4.53317e-09		0.403402	6.22584e-09		0.403402	8.26318e-09
0.403402	4.15821e-08		0.403402	9.2491e-08		0.403402	3.12302e-09		0.403402	4.53317e-09		0.403402	6.22584e-09		0.403402	8.26318e-09
0.406296	4.49139e-08		0.406296	1.01192e-07		0.406296	3.11395e-09		0.406296	4.51659e-09		0.406296	6.20415e-09		0.406296	8.2231e-09
0.40919	4.86543e-08		0.40919	1.09154e-07		0.40919	3.10471e-09		0.40919	4.49985e-09		0.40919	6.18168e-09		0.40919	8.18214e-09
0.412084	5.29828e-08		0.412084	1.16241e-07		0.412084	3.09527e-09		0.412084	4.48295e-09		0.412084	6.15839e-09		0.412084	8.14026e-09
0.414977	5.81416e-08		0.414977	1.22176e-07		0.414977	3.08564e-09		0.414977	4.46586e-09		0.414977	6.13425e-09		0.414977	8.09747e-09
0.417871	6.43146e-08		0.417871	1.26991e-07		0.417871	3.07582e-09		0.417871	4.44857e-09		0.417871	6.10929e-09		0.417871	8.05381e-09
0.420765	7.17525e-08		0.420765	1.30838e-07		0.420765	3.06583e-09		0.420765	4.43106e-09		0.420765	6.08354e-09		0.420765	8.00932e-09
0.423659	8.01194e-08		0.423659	1.33749e-07		0.423659	3.05566e-09		0.423659	4.41335e-09		0.423659	6.05705e-09		0.423659	7.96406e-09
0.426553	8.89368e-08		0.426553	1.35692e-07		0.426553	3.04535e-09		0.426553	4.39542e-09		0.426553	6.02987e-09		0.426553	7.91811e-09
0.429447	9.73782e-08		0.429447	1.36684e-07		0.429447	3.0349e-09		0.429447	4.37731e-09		0.429447	6.00206e-09		0.429447	7.87153e-09
0.432341	1.0421e-07		0.432341	1.36908e-07		0.432341	3.02435e-09		0.432341	4.35903e-09		0.432341	5.97365e-09		0.432341	7.82441e-09
0.435235	1.0947e-07		0.435235	1.36475e-07		0.435235	3.0137e-09		0.435235	4.34059e-09		0.435235	5.9447e-09		0.435235	7.77683e-09
0.438129	1.13648e-07		0.438129	1.35352e-07		0.438129	3.00298e-09		0.438129	4.32203e-09		0.438129	5.91524e-09		0.438129	7.72884e-09
0.441023	1.16861e-07		0.441023	1.3362e-07		0.441023	2.99221e-09		0.441023	4.30335e-09		0.441023	5.88529e-09		0.441023	7.68059e-09
0.443916	1.19159e-07		0.443916	1.31408e-07		0.443916	2.98139e-09		0.443916	4.28458e-09		0.443916	5.85488e-09		0.443916	7.63219e-09
0.44681	1.20571e-07		0.44681	1.28749e-07		0.44681	2.97055e-09		0.44681	4.26573e-09		0.44681	5.82401e-09		0.44681	7.58369e-09
0.449704	1.21004e-07		0.449704	1.25693e-07		0.449704	2.9597e-09		0.449704	4.24681e-09		0.449704	5.79283e-09		0.449704	7.53514e-09
0.452598	1.20693e-07		0.452598	1.22363e-07		0.452598	2.94884e-09		0.452598	4.22783e-09		0.452598	5.76154e-09		0.452598	7.48657e-09
0.455492	1.19881e-07		0.455492	1.18806e-07		0.455492	2.93798e-09		0.455492	4.20879e-09		0.455492	5.73016e-09		0.455492	7.43802e-09
0.458386	1.18482e-07		0.458386	1.15068e-07		0.458386	2.92715e-09		0.458386	4.1897e-09		0.458386	5.6987e-09		0.458386	7.38952e-09
0.46128	1.16554e-07		0.46128	1.11197e-07		0.46128	2.91633e-09		0.46128	4.17056e-09		0.46128	5.6672e-09		0.46128	7.3411e-09
0.464174	1.14233e-07		0.464174	1.07233e-07		0.464174	2.90555e-09		0.464174	4.15138e-09		0.464174	5.63567e-09		0.464174	7.29279e-09
0.467068	1.1151e-07		0.467068	1.03219e-07		0.467068	2.89482e-09		0.467068	4.13219e-09		0.467068	5.60411e-09		0.467068	7.2446e-09
0.469961	1.08412e-07		0.469961	9.91853e-08		0.469961	2.88414e-09		0.469961	4.11305e-09		0.469961	5.57254e-09		0.469961	7.19657e-09
0.472855	1.0507e-07		0.472855	9.51632e-08		0.472855	2.87353e-09		0.472855	4.09397e-09		0.472855	5.54097e-09		0.472855	7.14872e-09
0.475749	1.01579e-07		0.475749	9.11651e-08		0.475749	2.863e-09		0.475749	4.07495e-09		0.475749	5.50939e-09		0.475749	7.10107e-09
0.478643	9.79837e-08		0.478643	8.72105e-08		0.478643	2.85256e-09		0.478643	4.05601e-09		0.478643	5.47781e-09		0.478643	7.05377e-09
0.481537	9.42997e-08		0.481537	8.33339e-08		0.481537	2.84222e-09		0.481537	4.03716e-09		0.481537	5.44624e-09		0.481537	7.00702e-09
0.484431	9.05383e-08		0.484431	7.95489e-08		0.484431	2.832e-09		0.484431	4.01839e-09		0.484431	5.41466e-09		0.484431	6.96083e-09
0.487325	8.67326e-08		0.487325	7.58538e-08		0.487325	2.82191e-09		0.487325	3.99972e-09		0.487325	5.38307e-09		0.487325	6.91525e-09
0.490219	8.29463e-08		0.490219	7.22656e-08		0.490219	2.81189e-09		0.490219	3.98116e-09		0.490219	5.35146e-09		0.490219	6.87031e-09
0.493113	7.92165e-08		0.493113	6.88036e-08		0.493113	2.80187e-09		0.493113	3.96271e-09		0.493113	5.31982e-09		0.493113	6.82606e-09
0.496006	7.55683e-08		0.496006	6.54692e-08		0.496006	2.79185e-09		0.496006	3.94437e-09		0.496006	5.28833e-09		0.496006	6.78253e-09
0.4989	7.2012e-08		0.4989	6.22667e-08		0.4989	2.78183e-09		0.4989	3.92617e-09		0.4989	5.25718e-09		0.4989	6.73977e-09
0.501794	6.8535e-08		0.501794	5.91863e-08		0.501794	2.77181e-09		0.501794	3.90811e-09		0.501794	5.2264e-09		0.501794	6.69784e-09
0.504688	6.51424e-08		0.504688	5.62183e-08		0.504688	2.76181e-09		0.504688	3.89019e-09		0.504688	5.19601e-09		0.504688	6.65679e-09
0.507582	6.18627e-08		0.507582	5.33761e-08		0.507582	2.7518e-09		0.507582	3.87244e-09		0.507582	5.16604e-09		0.507582	6.61667e-09
0.510476	5.8701e-08		0.510476	5.06606e-08		0.510476	2.74181e-09		0.510476	3.85487e-09		0.510476	5.13653e-09		0.510476	6.57754e-09
0.51337	5.56526e-08		0.51337	4.8058e-08		0.51337	2.73182e-09		0.51337	3.83749e-09		0.51337	5.10753e-09		0.51337	6.53949e-09
0.516264	5.27316e-08		0.516264	4.55723e-08		0.516264	2.72183e-09		0.516264	3.82033e-09		0.516264	5.07909e-09		0.516264	6.50194e-09
0.519158	4.99405e-08		0.519158	4.32079e-08		0.519158	2.71183e-09		0.519158	3.8034e-09		0.519158	5.05129e-09		0.519158	6.46432e-09
0.522051	4.72685e-08		0.522051	4.09575e-08		0.522051	2.70184e-09		0.522051	3.78673e-09		0.522051	5.02422e-09		0.522051	6.42659e-09
0.524945	4.47308e-08		0.524945	3.88429e-08		0.524945	2.69182e-09		0.524945	3.77034e-09		0.524945	4.99802e-09		0.524945	6.38875e-09
0.524945	4.47308e-08		0.524945	3.88429e-08		0.524945	2.69182e-09		0.524945	3.77034e-09		0.524945	4.99802e-09		0.524945	6.38875e-09
0.527839	4.23275e-08		0.527839	3.68687e-08		0.527839	2.68181e-09		0.527839	3.75407e-09		0.527839	4.97233e-09		0.527839	6.35081e-09
0.530733	4.00474e-08		0.530733	3.50034e-08		0.530733	2.67184e-09		0.530733	3.73775e-09		0.530733	4.94669e-09		0.530733	6.31279e-09
0.533627	3.7887e-08		0.533627	3.32375e-08		0.533627	2.6619e-09		0.533627	3.72137e-09		0.533627	4.92108e-09		0.533627	6.27468e-09
0.536521	3.58422e-08		0.536521	3.15649e-08		0.536521	2.65199e-09		0.536521	3.70495e-09		0.536521	4.89547e-09		0.536521	6.23644e-09
0.539415	3.39085e-08		0.539415	2.99792e-08		0.539415	2.64213e-09		0.539415	3.6885e-09		0.539415	4.86982e-09		0.539415	6.19807e-09
0.542309	3.20803e-08		0.542309	2.84786e-08		0.542309	2.6323e-09		0.542309	3.67203e-09		0.542309	4.84417e-09		0.542309	6.15952e-09
0.545203	3.03488e-08		0.545203	2.70645e-08		0.545203	2.62251e-09		0.545203	3.65556e-09		0.545203	4.81859e-09		0.545203	6.12076e-09
0.548096	2.87096e-08		0.548096	2.57347e-08		0.548096	2.61277e-09		0.548096	3.63908e-09		0.548096	4.79306e-09		0.548096	6.08175e-09
0.55099	2.71684e-08		0.55099	2.44798e-08		0.55099	2.60307e-09		0.55099	3.6226e-09		0.55099	4.76758e-09		0.55099	6.04243e-09
0.553884	2.57255e-08		0.553884	2.32953e-08		0.553884	2.5934e-09		0.553884	3.60613e-09		0.553884	4.74212e-09		0.553884	6.00308e-09
0.556778	2.43678e-08		0.556778	2.2174e-08		0.556778	2.58378e-09		0.556778	3.58966e-09		0.556778	4.7167e-09		0.556778	5.96399e-09
0.559672	2.30891e-08		0.559672	2.11092e-08		0.559672	2.57419e-09		0.559672	3.5732e-09		0.559672	4.69129e-09		0.559672	5.92517e-09
0.562566	2.19004e-08		0.562566	2.01013e-08		0.562566	2.56464e-09		0.562566	3.55674e-09		0.562566	4.66591e-09		0.562566	5.8866e-09
0.56546	2.07869e-08		0.56546	1.91465e-08		0.56546	2.55512e-09		0.56546	3.54029e-09		0.56546	4.64053e-09		0.56546	5.84827e-09
0.568354	1.97206e-08		0.568354	1.82428e-08		0.568354	2.54563e-09		0.568354	3.52385e-09		0.568354	4.61517e-09		0.568354	5.81017e-09
0.571248	1.86987e-08		0.571248	1.73962e-08		0.571248	2.53617e-09		0.571248	3.50741e-09		0.571248	4.58982e-09		0.571248	5.7723e-09
0.574142	1.77258e-08		0.574142	1.65944e-08		0.574142	2.52674e-09		0.574142	3.49098e-09		0.574142	4.56448e-09		0.574142	5.73464e-09
0.577035	1.68068e-08		0.577035	1.5829e-08		0.577035	2.51733e-09		0.577035	3.47453e-09		0.577035	4.53914e-09		0.577035	5.69718e-09
0.579929	1.59436e-08		0.579929	1.51088e-08		0.579929	2.50794e-09		0.579929	3.45807e-09		0.579929	4.5138e-09		0.579929	5.6599e-09
0.582823	1.51401e-08		0.582823	1.4432e-08		0.582823	2.49858e-09		0.582823	3.44159e-09		0.582823	4.48846e-09		0.582823	5.62281e-09
0.585717	1.43823e-08		0.585717	1.3796e-08		0.585717	2.48924e-09		0.585717	3.42514e-09		0.585717	4.46311e-09		0.585717	5.58589e-09
0.588611	1.36519e-08		0.588611	1.31999e-08		0.588611	2.47991e-09		0.588611	3.40878e-09		0.588611	4.43774e-09		0.588611	5.54913e-09
0.591505	1.29589e-08		0.591505	1.26417e-08		0.591505	2.4706e-09		0.591505	3.39254e-09		0.591505	4.41248e-09		0.591505	5.51252e-09
0.594399	1.23127e-08		0.594399	1.21205e-08		0.594399	2.46131e-09		0.594399	3.37639e-09		0.594399	4.3875e-09		0.594399	5.47605e-09
0.597293	1.17118e-08		0.597293	1.16275e-08		0.597293	2.45202e-09		0.597293	3.36035e-09		0.597293	4.3628e-09		0.597293	5.43991e-09
0.600186	1.11538e-08		0.600186	1.11531e-08		0.600186	2.44275e-09		0.600186	3.34443e-09		0.600186	4.33838e-09		0.600186	5.40433e-09
0.60308	1.06395e-08		0.60308	1.07017e-08		0.60308	2.43349e-09		0.60308	3.32862e-09		0.60308	4.31428e-09		0.60308	5.36931e-09
0.605974	1.01645e-08		0.605974	1.02775e-08		0.605974	2.42423e-09		0.605974	3.31294e-09		0.605974	4.29048e-09		0.605974	5.33488e-09
0.608868	9.7078e-09		0.608868	9.88486e-09		0.608868	2.41499e-09		0.608868	3.2974e-09		0.608868	4.26702e-09		0.608868	5.30106e-09
0.611762	9.25451e-09		0.611762	9.5286e-09		0.611762	2.40575e-09		0.611762	3.282e-09		0.611762	4.24389e-09		0.611762	5.26787e-09
0.614656	8.81308e-09		0.614656	9.20975e-09		0.614656	2.39651e-09		0.614656	3.26675e-09		0.614656	4.22112e-09		0.614656	5.23535e-09
0.61755	8.39078e-09		0.61755	8.9126e-09		0.61755	2.38728e-09		0.61755	3.25166e-09		0.61755	4.19872e-09		0.61755	5.20353e-09
0.620444	7.99129e-09		0.620444	8.62133e-09		0.620444	2.37805e-09		0.620444	3.23673e-09		0.620444	4.17672e-09		0.620444	5.17247e-09
0.623338	7.61772e-09		0.623338	8.33673e-09		0.623338	2.36882e-09		0.623338	3.22199e-09		0.623338	4.15513e-09		0.623338	5.14221e-09
0.626231	7.27069e-09		0.626231	8.06053e-09		0.626231	2.35959e-09		0.626231	3.20743e-09		0.626231	4.13397e-09		0.626231	5.11282e-09
0.629125	6.95157e-09		0.629125	7.7923e-09		0.629125	2.35037e-09		0.629125	3.19306e-09		0.629125	4.11329e-09		0.629125	5.08438e-09
0.632019	6.6644e-09		0.632019	7.53137e-09		0.632019	2.34114e-09		0.632019	3.17891e-09		0.632019	4.09311e-09		0.632019	5.05699e-09
0.634913	6.41454e-09		0.634913	7.27863e-09		0.634913	2.33191e-09		0.634913	3.16497e-09		0.634913	4.07348e-09		0.634913	5.03078e-09
0.637807	6.18455e-09		0.637807	7.03682e-09		0.637807	2.32268e-09		0.637807	3.15126e-09		0.637807	4.05445e-09		0.637807	5.00592e-09
0.640701	5.96071e-09		0.640701	6.8097e-09		0.640701	2.31344e-09		0.640701	3.13782e-09		0.640701	4.03577e-09		0.640701	4.98174e-09
0.643595	5.75382e-09		0.643595	6.60149e-09		0.643595	2.30417e-09		0.643595	3.1247e-09		0.643595	4.01714e-09		0.643595	4.95746e-09
0.643595	5.75382e-09		0.643595	6.60149e-09		0.643595	2.30417e-09		0.643595	3.1247e-09		0.643595	4.01714e-09		0.643595	4.95746e-09
0.646489	5.56277e-09		0.646489	6.40973e-09		0.646489	2.2949e-09		0.646489	3.11177e-09		0.646489	3.99853e-09		0.646489	4.93315e-09
0.649383	5.38377e-09		0.649383	6.22914e-09		0.649383	2.28566e-09		0.649383	3.09892e-09		0.649383	3.97994e-09		0.649383	4.90885e-09
0.652277	5.2185e-09		0.652277	6.05924e-09		0.652277	2.27644e-09		0.652277	3.08616e-09		0.652277	3.96137e-09		0.652277	4.8846e-09
0.65517	5.06623e-09		0.65517	5.89923e-09		0.65517	2.26727e-09		0.65517	3.07347e-09		0.65517	3.94281e-09		0.65517	4.86038e-09
0.658064	4.92479e-09		0.658064	5.74753e-09		0.658064	2.25813e-09		0.658064	3.06084e-09		0.658064	3.92426e-09		0.658064	4.8362e-09
0.660958	4.79195e-09		0.660958	5.60259e-09		0.660958	2.24904e-09		0.660958	3.04826e-09		0.660958	3.90573e-09		0.660958	4.81202e-09
0.663852	4.66675e-09		0.663852	5.46362e-09		0.663852	2.24e-09		0.663852	3.03572e-09		0.663852	3.88719e-09		0.663852	4.78781e-09
0.666746	4.54855e-09		0.666746	5.32999e-09		0.666746	2.23101e-09		0.666746	3.02323e-09		0.666746	3.86866e-09		0.666746	4.76357e-09
0.66964	4.43619e-09		0.66964	5.20165e-09		0.66964	2.22206e-09		0.66964	3.01077e-09		0.66964	3.85013e-09		0.66964	4.73925e-09
0.672534	4.32853e-09		0.672534	5.07873e-09		0.672534	2.21317e-09		0.672534	2.99835e-09		0.672534	3.83158e-09		0.672534	4.71484e-09
0.675428	4.22524e-09		0.675428	4.96112e-09		0.675428	2.20434e-09		0.675428	2.98595e-09		0.675428	3.81302e-09		0.675428	4.69031e-09
0.678322	4.12596e-09		0.678322	4.84715e-09		0.678322	2.19556e-09		0.678322	2.97359e-09		0.678322	3.79443e-09		0.678322	4.66566e-09
0.681215	4.03182e-09		0.681215	4.73532e-09		0.681215	2.18683e-09		0.681215	2.96126e-09		0.681215	3.7758e-09		0.681215	4.64086e-09
0.684109	3.94205e-09		0.684109	4.62662e-09		0.684109	2.17816e-09		0.684109	2.94894e-09		0.684109	3.75713e-09		0.684109	4.61588e-09
0.687003	3.85436e-09		0.687003	4.52174e-09		0.687003	2.16956e-09		0.687003	2.93664e-09		0.687003	3.7384e-09		0.687003	4.59083e-09
0.689897	3.76862e-09		0.689897	4.4204e-09		0.689897	2.16101e-09		0.689897	2.92435e-09		0.689897	3.7196e-09		0.689897	4.56584e-09
0.692791	3.68477e-09		0.692791	4.32243e-09		0.692791	2.15253e-09		0.692791	2.91207e-09		0.692791	3.70071e-09		0.692791	4.5409e-09
0.695685	3.60342e-09		0.695685	4.22779e-09		0.695685	2.14412e-09		0.695685	2.89978e-09		0.695685	3.68181e-09		0.695685	4.51601e-09
0.698579	3.52534e-09		0.698579	4.13667e-09		0.698579	2.13577e-09		0.698579	2.8875e-09		0.698579	3.66297e-09		0.698579	4.49115e-09
0.701473	3.45068e-09		0.701473	4.04939e-09		0.701473	2.1275e-09		0.701473	2.8752e-09		0.701473	3.64421e-09		0.701473	4.46633e-09
0.704367	3.37963e-09		0.704367	3.9662e-09		0.704367	2.11931e-09		0.704367	2.86288e-09		0.704367	3.62551e-09		0.704367	4.44153e-09
0.70726	3.3125e-09		0.70726	3.88749e-09		0.70726	2.1112e-09		0.70726	2.85054e-09		0.70726	3.6069e-09		0.70726	4.41677e-09
0.710154	3.24981e-09		0.710154	3.81393e-09		0.710154	2.1032e-09		0.710154	2.83818e-09		0.710154	3.58838e-09		0.710154	4.39205e-09
0.713048	3.19185e-09		0.713048	3.74657e-09		0.713048	2.0953e-09		0.713048	2.8258e-09		0.713048	3.56998e-09		0.713048	4.3674e-09
0.715942	3.13915e-09		0.715942	3.6873e-09		0.715942	2.08753e-09		0.715942	2.81344e-09		0.715942	3.55176e-09		0.715942	4.34284e-09
0.715942	3.13915e-09		0.715942	3.6873e-09		0.715942	2.08753e-09		0.715942	2.81344e-09		0.715942	3.55176e-09		0.715942	4.34284e-09
0.718836	3.09027e-09		0.718836	3.63397e-09		0.718836	2.07984e-09		0.718836	2.80107e-09		0.718836	3.53361e-09		0.718836	4.31822e-09
0.72173	3.04308e-09		0.72173	3.58301e-09		0.72173	2.07217e-09		0.72173	2.78866e-09		0.72173	3.5154e-09		0.72173	4.29335e-09
0.724624	2.99749e-09		0.724624	3.53422e-09		0.724624	2.0645e-09		0.724624	2.77621e-09		0.724624	3.49712e-09		0.724624	4.26814e-09
0.727518	2.95336e-09		0.727518	3.48739e-09		0.727518	2.05679e-09		0.727518	2.76371e-09		0.727518	3.47875e-09		0.727518	4.24254e-09
0.730412	2.91051e-09		0.730412	3.44225e-09		0.730412	2.04904e-09		0.730412	2.75113e-09		0.730412	3.46025e-09		0.730412	4.21643e-09
0.733305	2.86889e-09		0.733305	3.39858e-09		0.733305	2.04125e-09		0.733305	2.73847e-09		0.733305	3.44162e-09		0.733305	4.18992e-09
0.736199	2.82849e-09		0.736199	3.3562e-09		0.736199	2.0334e-09		0.736199	2.72569e-09		0.736199	3.42283e-09		0.736199	4.16315e-09
0.739093	2.78916e-09		0.739093	3.31499e-09		0.739093	2.02549e-09		0.739093	2.71279e-09		0.739093	3.40385e-09		0.739093	4.13607e-09
0.741987	2.75074e-09		0.741987	3.27474e-09		0.741987	2.0175e-09		0.741987	2.69973e-09		0.741987	3.38465e-09		0.741987	4.10862e-09
0.744881	2.71309e-09		0.744881	3.23528e-09		0.744881	2.00941e-09		0.744881	2.6865e-09		0.744881	3.3652e-09		0.744881	4.08072e-09
0.747775	2.67609e-09		0.747775	3.19646e-09		0.747775	2.00122e-09		0.747775	2.67305e-09		0.747775	3.34548e-09		0.747775	4.05229e-09
0.750669	2.63964e-09		0.750669	3.15812e-09		0.750669	1.9929e-09		0.750669	2.65936e-09		0.750669	3.32538e-09		0.750669	4.02327e-09
0.753563	2.6035e-09		0.753563	3.1201e-09		0.753563	1.98443e-09		0.753563	2.64539e-09		0.753563	3.3048e-09		0.753563	3.99355e-09
0.756457	2.56738e-09		0.756457	3.08235e-09		0.756457	1.97578e-09		0.756457	2.63109e-09		0.756457	3.28368e-09		0.756457	3.96306e-09
0.75935	2.53136e-09		0.75935	3.04484e-09		0.75935	1.96692e-09		0.75935	2.61644e-09		0.75935	3.26196e-09		0.75935	3.93171e-09
0.762244	2.49556e-09		0.762244	3.00747e-09		0.762244	1.95783e-09		0.762244	2.60138e-09		0.762244	3.23959e-09		0.762244	3.8994e-09
0.765138	2.4599e-09		0.765138	2.97016e-09		0.765138	1.94847e-09		0.765138	2.58587e-09		0.765138	3.21651e-09		0.765138	3.86606e-09
0.768032	2.42433e-09		0.768032	2.9328e-09		0.768032	1.9388e-09		0.768032	2.56987e-09		0.768032	3.19267e-09		0.768032	3.8316e-09
0.770926	2.3888e-09		0.770926	2.89526e-09		0.770926	1.92879e-09		0.770926	2.55334e-09		0.770926	3.168e-09		0.770926	3.79596e-09
0.77382	2.3533e-09		0.77382	2.85746e-09		0.77382	1.9184e-09		0.77382	2.53625e-09		0.77382	3.14247e-09		0.77382	3.7591e-09
0.776714	2.31783e-09		0.776714	2.81933e-09		0.776714	1.90762e-09		0.776714	2.51858e-09		0.776714	3.11603e-09		0.776714	3.72107e-09
0.779608	2.28247e-09		0.779608	2.78086e-09		0.779608	1.89641e-09		0.779608	2.50031e-09		0.779608	3.08866e-09		0.779608	3.68196e-09
0.782502	2.24729e-09		0.782502	2.74218e-09		0.782502	1.88476e-09		0.782502	2.48143e-09		0.782502	3.06035e-09		0.782502	3.64181e-09
0.785396	2.21257e-09		0.785396	2.70342e-09		0.785396	1.87267e-09		0.785396	2.46196e-09		0.785396	3.03111e-09		0.785396	3.60071e-09
0.788289	2.17859e-09		0.788289	2.66463e-09		0.788289	1.86013e-09		0.788289	2.4419e-09		0.788289	3.00097e-09		0.788289	3.55879e-09
0.791183	2.14554e-09		0.791183	2.62594e-09		0.791183	1.84715e-09		0.791183	2.42128e-09		0.791183	2.96994e-09		0.791183	3.51622e-09
0.794077	2.11362e-09		0.794077	2.58747e-09		0.794077	1.83374e-09		0.794077	2.40013e-09		0.794077	2.93807e-09		0.794077	3.47317e-09
0.796971	2.083e-09		0.796971	2.54936e-09		0.796971	1.81991e-09		0.796971	2.37842e-09		0.796971	2.9054e-09		0.796971	3.42983e-09
0.799865	2.05378e-09		0.799865	2.51172e-09		0.799865	1.80566e-09		0.799865	2.35613e-09		0.799865	2.87196e-09		0.799865	3.38634e-09
0.799865	2.05378e-09		0.799865	2.51172e-09		0.799865	1.80566e-09		0.799865	2.35613e-09		0.799865	2.87196e-09		0.799865	3.38634e-09
0.802759	2.02516e-09		0.802759	2.47435e-09		0.802759	1.79085e-09		0.802759	2.33313e-09		0.802759	2.83758e-09		0.802759	3.34217e-09
0.805653	1.99639e-09		0.805653	2.43701e-09		0.805653	1.77533e-09		0.805653	2.30932e-09		0.805653	2.80208e-09		0.805653	3.29679e-09
0.808547	1.9676e-09		0.808547	2.39978e-09		0.808547	1.75907e-09		0.808547	2.28469e-09		0.808547	2.76546e-09		0.808547	3.25024e-09
0.811441	1.93884e-09		0.811441	2.36268e-09		0.811441	1.74202e-09		0.811441	2.25923e-09		0.811441	2.72773e-09		0.811441	3.20261e-09
0.814334	1.91014e-09		0.814334	2.32569e-09		0.814334	1.72414e-09		0.814334	2.23292e-09		0.814334	2.68889e-09		0.814334	3.15394e-09
0.817228	1.88146e-09		0.817228	2.28878e-09		0.817228	1.70537e-09		0.817228	2.20569e-09		0.817228	2.64897e-09		0.817228	3.10424e-09
0.820122	1.85272e-09		0.820122	2.2519e-09		0.820122	1.68564e-09		0.820122	2.17749e-09		0.820122	2.60804e-09		0.820122	3.05352e-09
0.823016	1.82381e-09		0.823016	2.21502e-09		0.823016	1.66489e-09		0.823016	2.1483e-09		0.823016	2.56615e-09		0.823016	3.00187e-09
0.82591	1.79461e-09		0.82591	2.17812e-09		0.82591	1.64302e-09		0.82591	2.11812e-09		0.82591	2.52329e-09		0.82591	2.94942e-09
0.828804	1.76492e-09		0.828804	2.14115e-09		0.828804	1.61994e-09		0.828804	2.08694e-09		0.828804	2.47949e-09		0.828804	2.89616e-09
0.831698	1.7347e-09		0.831698	2.10407e-09		0.831698	1.59595e-09		0.831698	2.05476e-09		0.831698	2.43473e-09		0.831698	2.84214e-09
0.834592	1.70402e-09		0.834592	2.0668e-09		0.834592	1.57147e-09		0.834592	2.02159e-09		0.834592	2.38903e-09		0.834592	2.78737e-09
0.837486	1.67323e-09		0.837486	2.02926e-09		0.837486	1.54662e-09		0.837486	1.98749e-09		0.837486	2.34256e-09		0.837486	2.7319e-09
0.840379	1.64268e-09		0.840379	1.99162e-09		0.840379	1.52149e-09		0.840379	1.95251e-09		0.840379	2.29558e-09		0.840379	2.67602e-09
0.843273	1.6123e-09		0.843273	1.9541e-09		0.843273	1.49619e-09		0.843273	1.91676e-09		0.843273	2.24819e-09		0.843273	2.62006e-09
0.846167	1.58202e-09		0.846167	1.91678e-09		0.846167	1.47084e-09		0.846167	1.88033e-09		0.846167	2.20048e-09		0.846167	2.56414e-09
0.849061	1.55178e-09		0.849061	1.87973e-09		0.849061	1.44559e-09		0.849061	1.84337e-09		0.849061	2.15257e-09		0.849061	2.50833e-09
0.851955	1.52155e-09		0.851955	1.84305e-09		0.851955	1.42063e-09		0.851955	1.806e-09		0.851955	2.10453e-09		0.851955	2.45272e-09
0.854849	1.49169e-09		0.854849	1.80687e-09		0.854849	1.39595e-09		0.854849	1.76842e-09		0.854849	2.05688e-09		0.854849	2.39787e-09
0.857743	1.46269e-09		0.857743	1.77136e-09		0.857743	1.37152e-09		0.857743	1.73097e-09		0.857743	2.01026e-09		0.857743	2.34448e-09
0.860637	1.43473e-09		0.860637	1.73707e-09		0.860637	1.34758e-09		0.860637	1.69413e-09		0.860637	1.96501e-09		0.860637	2.29288e-09
0.863531	1.40808e-09		0.863531	1.70472e-09		0.863531	1.32443e-09		0.863531	1.65838e-09		0.863531	1.92154e-09		0.863531	2.24349e-09
0.866424	1.38315e-09		0.866424	1.67483e-09		0.866424	1.30252e-09		0.866424	1.62435e-09		0.866424	1.88041e-09		0.866424	2.1969e-09
0.869318	1.3606e-09		0.869318	1.64817e-09		0.869318	1.28248e-09		0.869318	1.59299e-09		0.869318	1.84251e-09		0.869318	2.15428e-09
0.872212	1.34146e-09		0.872212	1.62586e-09		0.872212	1.2653e-09		0.872212	1.56581e-09		0.872212	1.80989e-09		0.872212	2.11795e-09
0.875106	1.32736e-09		0.875106	1.60941e-09		0.875106	1.25243e-09		0.875106	1.54531e-09		0.875106	1.78578e-09		0.875106	2.09128e-09
0.878	1.32189e-09		0.878	1.60295e-09		0.878	1.24729e-09		0.878	1.5371e-09		0.878	1.77628e-09		0.878	2.08082e-09

## Sheet: no2 distribution
SN 0			SN 0.2			SN 0.4			SN 0.6			SN 0.8			SN 1
Axial distance	no2 mass fraction		Axial distance	no2 mass fraction		Axial distance	no2 mass fraction		Axial distance	no2 mass fraction		Axial distance	no2 mass fraction		Axial distance	no2 mass fraction
0.00115113	3.434e-09		0.00115113	3.64205e-09		0.00115113	1.20069e-09		0.00115113	1.13511e-09		0.00115113	5.29747e-10		0.00115113	3.03431e-10
0.00404502	4.92275e-09		0.00404502	5.17171e-09		0.00404502	1.54704e-09		0.00404502	1.3809e-09		0.00404502	5.75918e-10		0.00404502	3.23499e-10
0.00693891	6.62732e-09		0.00693891	6.89867e-09		0.00693891	1.98213e-09		0.00693891	1.59083e-09		0.00693891	6.11459e-10		0.00693891	3.3596e-10
0.0098328	8.453e-09		0.0098328	8.65146e-09		0.0098328	2.52608e-09		0.0098328	1.7551e-09		0.0098328	6.3278e-10		0.0098328	3.3894e-10
0.0127267	1.03115e-08		0.0127267	1.03095e-08		0.0127267	3.16961e-09		0.0127267	1.86204e-09		0.0127267	6.38293e-10		0.0127267	3.30795e-10
0.0156206	1.21026e-08		0.0156206	1.17677e-08		0.0156206	3.88359e-09		0.0156206	1.91288e-09		0.0156206	6.27855e-10		0.0156206	3.13686e-10
0.0185145	1.372e-08		0.0185145	1.29417e-08		0.0185145	4.61343e-09		0.0185145	1.90561e-09		0.0185145	6.05431e-10		0.0185145	2.9163e-10
0.0214084	1.5077e-08		0.0214084	1.3795e-08		0.0214084	5.29546e-09		0.0214084	1.84568e-09		0.0214084	5.72577e-10		0.0214084	2.6988e-10
0.0243023	1.6125e-08		0.0243023	1.43437e-08		0.0243023	5.87094e-09		0.0243023	1.7453e-09		0.0243023	5.33296e-10		0.0243023	2.59645e-10
0.0271961	1.68593e-08		0.0271961	1.46419e-08		0.0271961	6.30056e-09		0.0271961	1.61172e-09		0.0271961	5.03399e-10		0.0271961	2.6905e-10
0.03009	1.73088e-08		0.03009	1.47636e-08		0.03009	6.57216e-09		0.03009	1.46407e-09		0.03009	5.00838e-10		0.03009	3.03847e-10
0.0329839	1.75216e-08		0.0329839	1.47879e-08		0.0329839	6.69687e-09		0.0329839	1.32715e-09		0.0329839	5.47328e-10		0.0329839	3.76455e-10
0.0358778	1.75557e-08		0.0358778	1.47854e-08		0.0358778	6.69773e-09		0.0358778	1.26305e-09		0.0358778	7.02812e-10		0.0358778	5.03391e-10
0.0387717	1.74755e-08		0.0387717	1.48122e-08		0.0387717	6.62082e-09		0.0387717	1.36758e-09		0.0387717	1.11579e-09		0.0387717	7.03875e-10
0.0416656	1.73357e-08		0.0416656	1.49088e-08		0.0416656	6.47845e-09		0.0416656	1.96098e-09		0.0416656	2.1554e-09		0.0416656	1.01489e-09
0.0445595	1.71783e-08		0.0445595	1.51018e-08		0.0445595	6.26457e-09		0.0445595	4.04788e-09		0.0445595	4.62092e-09		0.0445595	1.54706e-09
0.0474534	1.70432e-08		0.0474534	1.54044e-08		0.0474534	6.01605e-09		0.0474534	1.03753e-08		0.0474534	1.07571e-08		0.0474534	2.60293e-09
0.0503473	1.6962e-08		0.0503473	1.58179e-08		0.0503473	5.73971e-09		0.0503473	2.58848e-08		0.0503473	2.43238e-08		0.0503473	4.96202e-09
0.0532412	1.69562e-08		0.0532412	1.63346e-08		0.0532412	5.42521e-09		0.0532412	5.95722e-08		0.0532412	5.31483e-08		0.0532412	1.05559e-08
0.056135	1.70378e-08		0.056135	1.69379e-08		0.056135	5.08817e-09		0.056135	1.32356e-07		0.056135	1.14009e-07		0.056135	2.29677e-08
0.0590289	1.72133e-08		0.0590289	1.76037e-08		0.0590289	4.74876e-09		0.0590289	2.8177e-07		0.0590289	2.37207e-07		0.0590289	4.89349e-08
0.0619228	1.74859e-08		0.0619228	1.83023e-08		0.0619228	4.44097e-09		0.0619228	5.55553e-07		0.0619228	4.67645e-07		0.0619228	1.0223e-07
0.0648167	1.78528e-08		0.0648167	1.90035e-08		0.0648167	4.28948e-09		0.0648167	9.8053e-07		0.0648167	8.44563e-07		0.0648167	2.06872e-07
0.0677106	1.83067e-08		0.0677106	1.96809e-08		0.0677106	4.57784e-09		0.0677106	1.51722e-06		0.0677106	1.35397e-06		0.0677106	3.9742e-07
0.0706045	1.88375e-08		0.0706045	2.03138e-08		0.0706045	6.3044e-09		0.0706045	2.07013e-06		0.0706045	1.91077e-06		0.0706045	7.09513e-07
0.0734984	1.94324e-08		0.0734984	2.08857e-08		0.0734984	1.19707e-08		0.0734984	2.52496e-06		0.0734984	2.40304e-06		0.0734984	1.15155e-06
0.0763923	2.00773e-08		0.0763923	2.13849e-08		0.0763923	2.63495e-08		0.0763923	2.80086e-06		0.0763923	2.72447e-06		0.0763923	1.67877e-06
0.0792862	2.07579e-08		0.0792862	2.18075e-08		0.0792862	5.80209e-08		0.0792862	2.91882e-06		0.0792862	2.86871e-06		0.0792862	2.21091e-06
0.0821801	2.14727e-08		0.0821801	2.21545e-08		0.0821801	1.20642e-07		0.0821801	2.95044e-06		0.0821801	2.91881e-06		0.0821801	2.62824e-06
0.085074	2.21907e-08		0.085074	2.24315e-08		0.085074	2.32047e-07		0.085074	2.93778e-06		0.085074	2.92672e-06		0.085074	2.86732e-06
0.085074	2.21907e-08		0.085074	2.24315e-08		0.085074	2.32047e-07		0.085074	2.93778e-06		0.085074	2.92672e-06		0.085074	2.86732e-06
0.0879678	2.28838e-08		0.0879678	2.26479e-08		0.0879678	4.09687e-07		0.0879678	2.9052e-06		0.0879678	2.9144e-06		0.0879678	2.97888e-06
0.0908617	2.35561e-08		0.0908617	2.28159e-08		0.0908617	6.63177e-07		0.0908617	2.86554e-06		0.0908617	2.89263e-06		0.0908617	3.02283e-06
0.0937556	2.41995e-08		0.0937556	2.29484e-08		0.0937556	9.88413e-07		0.0937556	2.82085e-06		0.0937556	2.86713e-06		0.0937556	3.03341e-06
0.0966495	2.48059e-08		0.0966495	2.30576e-08		0.0966495	1.36791e-06		0.0966495	2.7752e-06		0.0966495	2.84122e-06		0.0966495	3.02804e-06
0.0995434	2.5368e-08		0.0995434	2.3156e-08		0.0995434	1.77749e-06		0.0995434	2.73135e-06		0.0995434	2.81635e-06		0.0995434	3.01595e-06
0.102437	2.58795e-08		0.102437	2.32547e-08		0.102437	2.18924e-06		0.102437	2.69039e-06		0.102437	2.79348e-06		0.102437	3.00144e-06
0.105331	2.63352e-08		0.105331	2.33632e-08		0.105331	2.53276e-06		0.105331	2.65342e-06		0.105331	2.77318e-06		0.105331	2.98652e-06
0.108225	2.67323e-08		0.108225	2.34898e-08		0.108225	2.7494e-06		0.108225	2.62056e-06		0.108225	2.75544e-06		0.108225	2.97281e-06
0.111119	2.70708e-08		0.111119	2.36442e-08		0.111119	2.85233e-06		0.111119	2.59163e-06		0.111119	2.7403e-06		0.111119	2.96057e-06
0.114013	2.7357e-08		0.114013	2.38278e-08		0.114013	2.87604e-06		0.114013	2.56647e-06		0.114013	2.72773e-06		0.114013	2.94967e-06
0.116907	2.75897e-08		0.116907	2.40408e-08		0.116907	2.84985e-06		0.116907	2.54502e-06		0.116907	2.71733e-06		0.116907	2.94e-06
0.119801	2.77714e-08		0.119801	2.42916e-08		0.119801	2.79558e-06		0.119801	2.52693e-06		0.119801	2.70875e-06		0.119801	2.93162e-06
0.122695	2.79107e-08		0.122695	2.4586e-08		0.122695	2.73019e-06		0.122695	2.51174e-06		0.122695	2.70168e-06		0.122695	2.92458e-06
0.125588	2.8012e-08		0.125588	2.49271e-08		0.125588	2.66271e-06		0.125588	2.49905e-06		0.125588	2.69581e-06		0.125588	2.91859e-06
0.128482	2.80861e-08		0.128482	2.53038e-08		0.128482	2.59681e-06		0.128482	2.48851e-06		0.128482	2.6909e-06		0.128482	2.91342e-06
0.131376	2.81388e-08		0.131376	2.56993e-08		0.131376	2.53422e-06		0.131376	2.47984e-06		0.131376	2.68673e-06		0.131376	2.90888e-06
0.13427	2.81756e-08		0.13427	2.60972e-08		0.13427	2.47662e-06		0.13427	2.47271e-06		0.13427	2.68312e-06		0.13427	2.90481e-06
0.137164	2.82037e-08		0.137164	2.64923e-08		0.137164	2.42499e-06		0.137164	2.46686e-06		0.137164	2.67995e-06		0.137164	2.90107e-06
0.140058	2.82406e-08		0.140058	2.68909e-08		0.140058	2.37934e-06		0.140058	2.46203e-06		0.140058	2.67709e-06		0.140058	2.89757e-06
0.142952	2.82894e-08		0.142952	2.73024e-08		0.142952	2.33983e-06		0.142952	2.45802e-06		0.142952	2.67447e-06		0.142952	2.89424e-06
0.145846	2.83407e-08		0.145846	2.77323e-08		0.145846	2.30573e-06		0.145846	2.45466e-06		0.145846	2.67201e-06		0.145846	2.89102e-06
0.14874	2.83988e-08		0.14874	2.81625e-08		0.14874	2.27608e-06		0.14874	2.45181e-06		0.14874	2.66967e-06		0.14874	2.88786e-06
0.151633	2.84693e-08		0.151633	2.85813e-08		0.151633	2.2502e-06		0.151633	2.44935e-06		0.151633	2.66739e-06		0.151633	2.88473e-06
0.154527	2.85568e-08		0.154527	2.89825e-08		0.154527	2.22773e-06		0.154527	2.44719e-06		0.154527	2.66516e-06		0.154527	2.8816e-06
0.157421	2.86665e-08		0.157421	2.93648e-08		0.157421	2.20828e-06		0.157421	2.44524e-06		0.157421	2.66294e-06		0.157421	2.87846e-06
0.160315	2.87997e-08		0.160315	2.97388e-08		0.160315	2.19153e-06		0.160315	2.44347e-06		0.160315	2.66077e-06		0.160315	2.87528e-06
0.163209	2.8957e-08		0.163209	3.01082e-08		0.163209	2.17716e-06		0.163209	2.44181e-06		0.163209	2.65866e-06		0.163209	2.87206e-06
0.166103	2.91493e-08		0.166103	3.04887e-08		0.166103	2.16492e-06		0.166103	2.44024e-06		0.166103	2.6566e-06		0.166103	2.86879e-06
0.166103	2.91493e-08		0.166103	3.04887e-08		0.166103	2.16492e-06		0.166103	2.44024e-06		0.166103	2.6566e-06		0.166103	2.86879e-06
0.168997	2.93836e-08		0.168997	3.08979e-08		0.168997	2.15453e-06		0.168997	2.43864e-06		0.168997	2.65449e-06		0.168997	2.86552e-06
0.171891	2.96586e-08		0.171891	3.13294e-08		0.171891	2.14567e-06		0.171891	2.43696e-06		0.171891	2.65226e-06		0.171891	2.86228e-06
0.174785	2.99721e-08		0.174785	3.17843e-08		0.174785	2.13813e-06		0.174785	2.43521e-06		0.174785	2.64994e-06		0.174785	2.85905e-06
0.177678	3.03208e-08		0.177678	3.22725e-08		0.177678	2.13174e-06		0.177678	2.43339e-06		0.177678	2.64755e-06		0.177678	2.85582e-06
0.180572	3.07071e-08		0.180572	3.27929e-08		0.180572	2.12629e-06		0.180572	2.43151e-06		0.180572	2.64508e-06		0.180572	2.85259e-06
0.183466	3.11233e-08		0.183466	3.33416e-08		0.183466	2.12165e-06		0.183466	2.42958e-06		0.183466	2.64256e-06		0.183466	2.84936e-06
0.18636	3.15652e-08		0.18636	3.39189e-08		0.18636	2.11766e-06		0.18636	2.4276e-06		0.18636	2.63998e-06		0.18636	2.84611e-06
0.189254	3.20388e-08		0.189254	3.45281e-08		0.189254	2.11421e-06		0.189254	2.42557e-06		0.189254	2.63735e-06		0.189254	2.84285e-06
0.192148	3.25369e-08		0.192148	3.51713e-08		0.192148	2.11118e-06		0.192148	2.4235e-06		0.192148	2.63467e-06		0.192148	2.83957e-06
0.195042	3.30529e-08		0.195042	3.58518e-08		0.195042	2.10848e-06		0.195042	2.42139e-06		0.195042	2.63194e-06		0.195042	2.83628e-06
0.197936	3.35902e-08		0.197936	3.65753e-08		0.197936	2.10606e-06		0.197936	2.41925e-06		0.197936	2.62917e-06		0.197936	2.83296e-06
0.20083	3.41525e-08		0.20083	3.73403e-08		0.20083	2.10383e-06		0.20083	2.41708e-06		0.20083	2.62635e-06		0.20083	2.82963e-06
0.203723	3.47417e-08		0.203723	3.81475e-08		0.203723	2.10176e-06		0.203723	2.41487e-06		0.203723	2.62349e-06		0.203723	2.82628e-06
0.206617	3.53604e-08		0.206617	3.90085e-08		0.206617	2.0998e-06		0.206617	2.41264e-06		0.206617	2.62059e-06		0.206617	2.82291e-06
0.209511	3.60106e-08		0.209511	3.99361e-08		0.209511	2.09793e-06		0.209511	2.41038e-06		0.209511	2.61764e-06		0.209511	2.81951e-06
0.212405	3.6696e-08		0.212405	4.09407e-08		0.212405	2.09612e-06		0.212405	2.4081e-06		0.212405	2.61465e-06		0.212405	2.81611e-06
0.215299	3.74178e-08		0.215299	4.20319e-08		0.215299	2.09436e-06		0.215299	2.40579e-06		0.215299	2.61162e-06		0.215299	2.81269e-06
0.215299	3.74178e-08		0.215299	4.20319e-08		0.215299	2.09436e-06		0.215299	2.40579e-06		0.215299	2.61162e-06		0.215299	2.81269e-06
0.218193	3.81851e-08		0.218193	4.32256e-08		0.218193	2.09262e-06		0.218193	2.40346e-06		0.218193	2.60853e-06		0.218193	2.80923e-06
0.221087	3.90058e-08		0.221087	4.45367e-08		0.221087	2.09087e-06		0.221087	2.40109e-06		0.221087	2.60538e-06		0.221087	2.80566e-06
0.223981	3.98816e-08		0.223981	4.59718e-08		0.223981	2.0891e-06		0.223981	2.39868e-06		0.223981	2.60217e-06		0.223981	2.80197e-06
0.226875	4.0804e-08		0.226875	4.75295e-08		0.226875	2.0873e-06		0.226875	2.39624e-06		0.226875	2.5989e-06		0.226875	2.79813e-06
0.229768	4.17725e-08		0.229768	4.92197e-08		0.229768	2.08548e-06		0.229768	2.39377e-06		0.229768	2.59555e-06		0.229768	2.79415e-06
0.232662	4.28003e-08		0.232662	5.1062e-08		0.232662	2.08362e-06		0.232662	2.39126e-06		0.232662	2.59213e-06		0.232662	2.79006e-06
0.235556	4.38928e-08		0.235556	5.30668e-08		0.235556	2.08174e-06		0.235556	2.38872e-06		0.235556	2.58864e-06		0.235556	2.78589e-06
0.23845	4.50457e-08		0.23845	5.52325e-08		0.23845	2.07983e-06		0.23845	2.38616e-06		0.23845	2.58507e-06		0.23845	2.78163e-06
0.241344	4.62545e-08		0.241344	5.7567e-08		0.241344	2.0779e-06		0.241344	2.38356e-06		0.241344	2.58145e-06		0.241344	2.7773e-06
0.244238	4.75253e-08		0.244238	6.00915e-08		0.244238	2.07594e-06		0.244238	2.38093e-06		0.244238	2.57783e-06		0.244238	2.77289e-06
0.247132	4.88635e-08		0.247132	6.28192e-08		0.247132	2.07397e-06		0.247132	2.37827e-06		0.247132	2.57419e-06		0.247132	2.76842e-06
0.250026	5.02733e-08		0.250026	6.57524e-08		0.250026	2.07197e-06		0.250026	2.37559e-06		0.250026	2.57053e-06		0.250026	2.76387e-06
0.25292	5.17587e-08		0.25292	6.89035e-08		0.25292	2.06996e-06		0.25292	2.37288e-06		0.25292	2.56684e-06		0.25292	2.75927e-06
0.255814	5.33212e-08		0.255814	7.22988e-08		0.255814	2.06793e-06		0.255814	2.37015e-06		0.255814	2.56314e-06		0.255814	2.75459e-06
0.258707	5.49688e-08		0.258707	7.59469e-08		0.258707	2.06588e-06		0.258707	2.36739e-06		0.258707	2.55942e-06		0.258707	2.74986e-06
0.261601	5.67114e-08		0.261601	7.98643e-08		0.261601	2.06382e-06		0.261601	2.3646e-06		0.261601	2.55568e-06		0.261601	2.74506e-06
0.264495	5.85548e-08		0.264495	8.40809e-08		0.264495	2.06174e-06		0.264495	2.36179e-06		0.264495	2.55192e-06		0.264495	2.74021e-06
0.267389	6.05016e-08		0.267389	8.86086e-08		0.267389	2.05965e-06		0.267389	2.35896e-06		0.267389	2.54813e-06		0.267389	2.73529e-06
0.270283	6.25543e-08		0.270283	9.34572e-08		0.270283	2.05754e-06		0.270283	2.35613e-06		0.270283	2.54433e-06		0.270283	2.73031e-06
0.273177	6.47238e-08		0.273177	9.86541e-08		0.273177	2.05542e-06		0.273177	2.35328e-06		0.273177	2.54051e-06		0.273177	2.72527e-06
0.276071	6.70232e-08		0.276071	1.04239e-07		0.276071	2.05328e-06		0.276071	2.35042e-06		0.276071	2.53666e-06		0.276071	2.72016e-06
0.278965	6.94645e-08		0.278965	1.10233e-07		0.278965	2.05113e-06		0.278965	2.34755e-06		0.278965	2.5328e-06		0.278965	2.71499e-06
0.281859	7.2066e-08		0.281859	1.16652e-07		0.281859	2.04897e-06		0.281859	2.34467e-06		0.281859	2.52892e-06		0.281859	2.70978e-06
0.284752	7.48476e-08		0.284752	1.23512e-07		0.284752	2.0468e-06		0.284752	2.34178e-06		0.284752	2.52502e-06		0.284752	2.70457e-06
0.287646	7.78196e-08		0.287646	1.30821e-07		0.287646	2.04462e-06		0.287646	2.33887e-06		0.287646	2.52111e-06		0.287646	2.69934e-06
0.29054	8.09921e-08		0.29054	1.38599e-07		0.29054	2.04242e-06		0.29054	2.33596e-06		0.29054	2.51717e-06		0.29054	2.69411e-06
0.293434	8.43841e-08		0.293434	1.46877e-07		0.293434	2.04022e-06		0.293434	2.33304e-06		0.293434	2.51322e-06		0.293434	2.68886e-06
0.296328	8.8018e-08		0.296328	1.5569e-07		0.296328	2.038e-06		0.296328	2.3301e-06		0.296328	2.50926e-06		0.296328	2.68361e-06
0.299222	9.19192e-08		0.299222	1.65054e-07		0.299222	2.03576e-06		0.299222	2.32715e-06		0.299222	2.50528e-06		0.299222	2.67834e-06
0.302116	9.61171e-08		0.302116	1.74987e-07		0.302116	2.03352e-06		0.302116	2.32419e-06		0.302116	2.50126e-06		0.302116	2.67305e-06
0.30501	1.00643e-07		0.30501	1.85507e-07		0.30501	2.03126e-06		0.30501	2.32123e-06		0.30501	2.49715e-06		0.30501	2.66775e-06
0.307904	1.0553e-07		0.307904	1.9664e-07		0.307904	2.02898e-06		0.307904	2.31825e-06		0.307904	2.49297e-06		0.307904	2.66244e-06
0.310797	1.10808e-07		0.310797	2.08416e-07		0.310797	2.02668e-06		0.310797	2.31526e-06		0.310797	2.48872e-06		0.310797	2.65711e-06
0.313691	1.16518e-07		0.313691	2.2087e-07		0.313691	2.02436e-06		0.313691	2.31225e-06		0.313691	2.48438e-06		0.313691	2.65175e-06
0.313691	1.16518e-07		0.313691	2.2087e-07		0.313691	2.02436e-06		0.313691	2.31225e-06		0.313691	2.48438e-06		0.313691	2.65175e-06
0.316585	1.22693e-07		0.316585	2.34061e-07		0.316585	2.02199e-06		0.316585	2.30922e-06		0.316585	2.48001e-06		0.316585	2.64634e-06
0.319479	1.29371e-07		0.319479	2.48054e-07		0.319479	2.01959e-06		0.319479	2.30614e-06		0.319479	2.47564e-06		0.319479	2.64085e-06
0.322373	1.36599e-07		0.322373	2.6289e-07		0.322373	2.01717e-06		0.322373	2.30301e-06		0.322373	2.47126e-06		0.322373	2.63528e-06
0.325267	1.44411e-07		0.325267	2.78596e-07		0.325267	2.01475e-06		0.325267	2.29985e-06		0.325267	2.46687e-06		0.325267	2.62966e-06
0.328161	1.52847e-07		0.328161	2.9521e-07		0.328161	2.01233e-06		0.328161	2.29665e-06		0.328161	2.46246e-06		0.328161	2.62403e-06
0.331055	1.61955e-07		0.331055	3.12799e-07		0.331055	2.0099e-06		0.331055	2.29341e-06		0.331055	2.45803e-06		0.331055	2.61838e-06
0.333949	1.71787e-07		0.333949	3.31439e-07		0.333949	2.00747e-06		0.333949	2.29013e-06		0.333949	2.45358e-06		0.333949	2.61273e-06
0.336842	1.82394e-07		0.336842	3.51201e-07		0.336842	2.00505e-06		0.336842	2.28681e-06		0.336842	2.44911e-06		0.336842	2.60706e-06
0.339736	1.9383e-07		0.339736	3.72178e-07		0.339736	2.00262e-06		0.339736	2.28347e-06		0.339736	2.44462e-06		0.339736	2.60138e-06
0.34263	2.0615e-07		0.34263	3.94474e-07		0.34263	2.0002e-06		0.34263	2.28013e-06		0.34263	2.4401e-06		0.34263	2.59568e-06
0.345524	2.1941e-07		0.345524	4.18161e-07		0.345524	1.99778e-06		0.345524	2.27679e-06		0.345524	2.43555e-06		0.345524	2.58998e-06
0.348418	2.33668e-07		0.348418	4.4332e-07		0.348418	1.99537e-06		0.348418	2.27346e-06		0.348418	2.43096e-06		0.348418	2.58426e-06
0.351312	2.48984e-07		0.351312	4.7007e-07		0.351312	1.99295e-06		0.351312	2.27014e-06		0.351312	2.42634e-06		0.351312	2.57853e-06
0.354206	2.65419e-07		0.354206	4.98536e-07		0.354206	1.99054e-06		0.354206	2.26682e-06		0.354206	2.42169e-06		0.354206	2.57278e-06
0.3571	2.83045e-07		0.3571	5.2889e-07		0.3571	1.98813e-06		0.3571	2.2635e-06		0.3571	2.41708e-06		0.3571	2.56701e-06
0.359994	3.01949e-07		0.359994	5.61324e-07		0.359994	1.98573e-06		0.359994	2.26019e-06		0.359994	2.41249e-06		0.359994	2.56122e-06
0.362887	3.2224e-07		0.362887	5.95953e-07		0.362887	1.98332e-06		0.362887	2.25688e-06		0.362887	2.40794e-06		0.362887	2.55541e-06
0.365781	3.44012e-07		0.365781	6.32916e-07		0.365781	1.98092e-06		0.365781	2.25358e-06		0.365781	2.40342e-06		0.365781	2.5496e-06
0.368675	3.67354e-07		0.368675	6.7246e-07		0.368675	1.97853e-06		0.368675	2.25029e-06		0.368675	2.39894e-06		0.368675	2.54381e-06
0.371569	3.92373e-07		0.371569	7.15002e-07		0.371569	1.97613e-06		0.371569	2.24699e-06		0.371569	2.3945e-06		0.371569	2.53806e-06
0.374463	4.19175e-07		0.374463	7.60982e-07		0.374463	1.97374e-06		0.374463	2.24371e-06		0.374463	2.39009e-06		0.374463	2.53233e-06
0.377357	4.47864e-07		0.377357	8.10623e-07		0.377357	1.97136e-06		0.377357	2.24043e-06		0.377357	2.38573e-06		0.377357	2.52662e-06
0.380251	4.78552e-07		0.380251	8.64304e-07		0.380251	1.96897e-06		0.380251	2.23715e-06		0.380251	2.3814e-06		0.380251	2.52095e-06
0.383145	5.11338e-07		0.383145	9.22747e-07		0.383145	1.96659e-06		0.383145	2.23387e-06		0.383145	2.37712e-06		0.383145	2.5153e-06
0.386039	5.46344e-07		0.386039	9.86804e-07		0.386039	1.96421e-06		0.386039	2.23059e-06		0.386039	2.37288e-06		0.386039	2.50967e-06
0.388932	5.83668e-07		0.388932	1.0578e-06		0.388932	1.96183e-06		0.388932	2.22732e-06		0.388932	2.36869e-06		0.388932	2.50407e-06
0.391826	6.23379e-07		0.391826	1.13797e-06		0.391826	1.95945e-06		0.391826	2.22404e-06		0.391826	2.36453e-06		0.391826	2.49849e-06
0.39472	6.65571e-07		0.39472	1.23046e-06		0.39472	1.95706e-06		0.39472	2.22075e-06		0.39472	2.36041e-06		0.39472	2.49293e-06
0.397614	7.10372e-07		0.397614	1.3393e-06		0.397614	1.95466e-06		0.397614	2.21744e-06		0.397614	2.35634e-06		0.397614	2.48738e-06
0.400508	7.57964e-07		0.400508	1.46714e-06		0.400508	1.95225e-06		0.400508	2.21412e-06		0.400508	2.3523e-06		0.400508	2.48183e-06
0.403402	8.08553e-07		0.403402	1.61192e-06		0.403402	1.94983e-06		0.403402	2.21078e-06		0.403402	2.34824e-06		0.403402	2.4763e-06
0.403402	8.08553e-07		0.403402	1.61192e-06		0.403402	1.94983e-06		0.403402	2.21078e-06		0.403402	2.34824e-06		0.403402	2.4763e-06
0.406296	8.62389e-07		0.406296	1.7699e-06		0.406296	1.9474e-06		0.406296	2.20741e-06		0.406296	2.34413e-06		0.406296	2.47075e-06
0.40919	9.19793e-07		0.40919	1.93951e-06		0.40919	1.94495e-06		0.40919	2.20403e-06		0.40919	2.33997e-06		0.40919	2.46517e-06
0.412084	9.81161e-07		0.412084	2.11464e-06		0.412084	1.94248e-06		0.412084	2.20063e-06		0.412084	2.33574e-06		0.412084	2.45955e-06
0.414977	1.04712e-06		0.414977	2.29142e-06		0.414977	1.93998e-06		0.414977	2.19721e-06		0.414977	2.33146e-06		0.414977	2.45389e-06
0.417871	1.11831e-06		0.417871	2.46971e-06		0.417871	1.93746e-06		0.417871	2.19377e-06		0.417871	2.32712e-06		0.417871	2.44818e-06
0.420765	1.19562e-06		0.420765	2.64527e-06		0.420765	1.9349e-06		0.420765	2.1903e-06		0.420765	2.32271e-06		0.420765	2.44243e-06
0.423659	1.28064e-06		0.423659	2.81618e-06		0.423659	1.93233e-06		0.423659	2.1868e-06		0.423659	2.31825e-06		0.423659	2.43664e-06
0.426553	1.37613e-06		0.426553	2.98228e-06		0.426553	1.92973e-06		0.426553	2.18328e-06		0.426553	2.31372e-06		0.426553	2.43082e-06
0.429447	1.48623e-06		0.429447	3.14177e-06		0.429447	1.92711e-06		0.429447	2.17973e-06		0.429447	2.30915e-06		0.429447	2.42496e-06
0.432341	1.61363e-06		0.432341	3.29241e-06		0.432341	1.92447e-06		0.432341	2.17616e-06		0.432341	2.30452e-06		0.432341	2.41907e-06
0.435235	1.75856e-06		0.435235	3.43356e-06		0.435235	1.92182e-06		0.435235	2.17257e-06		0.435235	2.29986e-06		0.435235	2.41317e-06
0.438129	1.91424e-06		0.438129	3.56543e-06		0.438129	1.91916e-06		0.438129	2.16897e-06		0.438129	2.29515e-06		0.438129	2.40725e-06
0.441023	2.07586e-06		0.441023	3.6872e-06		0.441023	1.91648e-06		0.441023	2.16535e-06		0.441023	2.29041e-06		0.441023	2.40131e-06
0.443916	2.24247e-06		0.443916	3.79866e-06		0.443916	1.9138e-06		0.443916	2.16172e-06		0.443916	2.28564e-06		0.443916	2.39537e-06
0.44681	2.40983e-06		0.44681	3.89949e-06		0.44681	1.91112e-06		0.44681	2.15809e-06		0.44681	2.28085e-06		0.44681	2.38941e-06
0.449704	2.57493e-06		0.449704	3.98975e-06		0.449704	1.90843e-06		0.449704	2.15445e-06		0.449704	2.27603e-06		0.449704	2.38345e-06
0.452598	2.73489e-06		0.452598	4.07043e-06		0.452598	1.90574e-06		0.452598	2.1508e-06		0.452598	2.27119e-06		0.452598	2.37748e-06
0.455492	2.88852e-06		0.455492	4.14067e-06		0.455492	1.90305e-06		0.455492	2.14715e-06		0.455492	2.26633e-06		0.455492	2.37151e-06
0.458386	3.03488e-06		0.458386	4.2002e-06		0.458386	1.90036e-06		0.458386	2.1435e-06		0.458386	2.26146e-06		0.458386	2.36555e-06
0.46128	3.17203e-06		0.46128	4.25007e-06		0.46128	1.89767e-06		0.46128	2.13985e-06		0.46128	2.25658e-06		0.46128	2.35959e-06
0.464174	3.29961e-06		0.464174	4.29124e-06		0.464174	1.89499e-06		0.464174	2.13621e-06		0.464174	2.25169e-06		0.464174	2.35363e-06
0.467068	3.41808e-06		0.467068	4.324e-06		0.467068	1.8923e-06		0.467068	2.13256e-06		0.467068	2.24678e-06		0.467068	2.34769e-06
0.469961	3.52649e-06		0.469961	4.34849e-06		0.469961	1.88962e-06		0.469961	2.12892e-06		0.469961	2.24187e-06		0.469961	2.34176e-06
0.472855	3.6234e-06		0.472855	4.3662e-06		0.472855	1.88694e-06		0.472855	2.12528e-06		0.472855	2.23696e-06		0.472855	2.33585e-06
0.475749	3.71027e-06		0.475749	4.37637e-06		0.475749	1.88427e-06		0.475749	2.12163e-06		0.475749	2.23204e-06		0.475749	2.32996e-06
0.478643	3.78646e-06		0.478643	4.37913e-06		0.478643	1.88161e-06		0.478643	2.11799e-06		0.478643	2.22712e-06		0.478643	2.32408e-06
0.481537	3.85016e-06		0.481537	4.3766e-06		0.481537	1.87896e-06		0.481537	2.11435e-06		0.481537	2.2222e-06		0.481537	2.31823e-06
0.484431	3.90252e-06		0.484431	4.36946e-06		0.484431	1.87631e-06		0.484431	2.11071e-06		0.484431	2.21728e-06		0.484431	2.3124e-06
0.487325	3.94542e-06		0.487325	4.35766e-06		0.487325	1.87367e-06		0.487325	2.10708e-06		0.487325	2.21236e-06		0.487325	2.3066e-06
0.490219	3.97969e-06		0.490219	4.34138e-06		0.490219	1.87104e-06		0.490219	2.10344e-06		0.490219	2.20745e-06		0.490219	2.30083e-06
0.493113	4.00579e-06		0.493113	4.32009e-06		0.493113	1.86842e-06		0.493113	2.09982e-06		0.493113	2.20254e-06		0.493113	2.29509e-06
0.496006	4.02481e-06		0.496006	4.29386e-06		0.496006	1.8658e-06		0.496006	2.09619e-06		0.496006	2.19763e-06		0.496006	2.28939e-06
0.4989	4.03686e-06		0.4989	4.26352e-06		0.4989	1.86318e-06		0.4989	2.09257e-06		0.4989	2.19274e-06		0.4989	2.28373e-06
0.501794	4.04085e-06		0.501794	4.22983e-06		0.501794	1.86056e-06		0.501794	2.08896e-06		0.501794	2.18787e-06		0.501794	2.2781e-06
0.504688	4.03842e-06		0.504688	4.19454e-06		0.504688	1.85795e-06		0.504688	2.08535e-06		0.504688	2.18302e-06		0.504688	2.27251e-06
0.507582	4.03198e-06		0.507582	4.15765e-06		0.507582	1.85534e-06		0.507582	2.08175e-06		0.507582	2.1782e-06		0.507582	2.26697e-06
0.510476	4.0207e-06		0.510476	4.1197e-06		0.510476	1.85273e-06		0.510476	2.07815e-06		0.510476	2.17339e-06		0.510476	2.26148e-06
0.51337	4.0037e-06		0.51337	4.08145e-06		0.51337	1.85012e-06		0.51337	2.07456e-06		0.51337	2.16861e-06		0.51337	2.25604e-06
0.516264	3.9822e-06		0.516264	4.04221e-06		0.516264	1.8475e-06		0.516264	2.07097e-06		0.516264	2.16385e-06		0.516264	2.25063e-06
0.519158	3.95766e-06		0.519158	4.00144e-06		0.519158	1.84489e-06		0.519158	2.06739e-06		0.519158	2.15912e-06		0.519158	2.24522e-06
0.522051	3.93024e-06		0.522051	3.95985e-06		0.522051	1.84226e-06		0.522051	2.06381e-06		0.522051	2.15442e-06		0.522051	2.23982e-06
0.524945	3.89985e-06		0.524945	3.91677e-06		0.524945	1.83961e-06		0.524945	2.06024e-06		0.524945	2.14976e-06		0.524945	2.23442e-06
0.524945	3.89985e-06		0.524945	3.91677e-06		0.524945	1.83961e-06		0.524945	2.06024e-06		0.524945	2.14976e-06		0.524945	2.23442e-06
0.527839	3.86681e-06		0.527839	3.87178e-06		0.527839	1.83697e-06		0.527839	2.05667e-06		0.527839	2.14512e-06		0.527839	2.22903e-06
0.530733	3.83201e-06		0.530733	3.82621e-06		0.530733	1.83432e-06		0.530733	2.05309e-06		0.530733	2.14048e-06		0.530733	2.22366e-06
0.533627	3.79545e-06		0.533627	3.78039e-06		0.533627	1.83168e-06		0.533627	2.04951e-06		0.533627	2.13586e-06		0.533627	2.2183e-06
0.536521	3.75729e-06		0.536521	3.73446e-06		0.536521	1.82904e-06		0.536521	2.04593e-06		0.536521	2.13123e-06		0.536521	2.21297e-06
0.539415	3.71795e-06		0.539415	3.68866e-06		0.539415	1.82641e-06		0.539415	2.04235e-06		0.539415	2.12662e-06		0.539415	2.20766e-06
0.542309	3.67762e-06		0.542309	3.6432e-06		0.542309	1.82377e-06		0.542309	2.03878e-06		0.542309	2.122e-06		0.542309	2.20238e-06
0.545203	3.63631e-06		0.545203	3.59826e-06		0.545203	1.82114e-06		0.545203	2.0352e-06		0.545203	2.11741e-06		0.545203	2.19711e-06
0.548096	3.5947e-06		0.548096	3.5538e-06		0.548096	1.81851e-06		0.548096	2.03163e-06		0.548096	2.11283e-06		0.548096	2.19188e-06
0.55099	3.55298e-06		0.55099	3.50974e-06		0.55099	1.81587e-06		0.55099	2.02807e-06		0.55099	2.10826e-06		0.55099	2.18667e-06
0.553884	3.51082e-06		0.553884	3.46611e-06		0.553884	1.81324e-06		0.553884	2.02451e-06		0.553884	2.1037e-06		0.553884	2.18148e-06
0.556778	3.4681e-06		0.556778	3.42315e-06		0.556778	1.81061e-06		0.556778	2.02095e-06		0.556778	2.09916e-06		0.556778	2.17631e-06
0.559672	3.42553e-06		0.559672	3.38119e-06		0.559672	1.80797e-06		0.559672	2.0174e-06		0.559672	2.09463e-06		0.559672	2.17115e-06
0.562566	3.38373e-06		0.562566	3.34014e-06		0.562566	1.80533e-06		0.562566	2.01385e-06		0.562566	2.0901e-06		0.562566	2.166e-06
0.56546	3.34218e-06		0.56546	3.29995e-06		0.56546	1.80268e-06		0.56546	2.0103e-06		0.56546	2.08559e-06		0.56546	2.16087e-06
0.568354	3.30084e-06		0.568354	3.26063e-06		0.568354	1.80004e-06		0.568354	2.00676e-06		0.568354	2.08109e-06		0.568354	2.15575e-06
0.571248	3.26012e-06		0.571248	3.22208e-06		0.571248	1.79739e-06		0.571248	2.00322e-06		0.571248	2.0766e-06		0.571248	2.15065e-06
0.574142	3.22041e-06		0.574142	3.18463e-06		0.574142	1.79473e-06		0.574142	1.99968e-06		0.574142	2.07211e-06		0.574142	2.14557e-06
0.577035	3.18181e-06		0.577035	3.14838e-06		0.577035	1.79208e-06		0.577035	1.99613e-06		0.577035	2.06763e-06		0.577035	2.1405e-06
0.579929	3.14397e-06		0.579929	3.11297e-06		0.579929	1.78942e-06		0.579929	1.99259e-06		0.579929	2.06316e-06		0.579929	2.13545e-06
0.582823	3.1067e-06		0.582823	3.07828e-06		0.582823	1.78676e-06		0.582823	1.98904e-06		0.582823	2.0587e-06		0.582823	2.13042e-06
0.585717	3.06982e-06		0.585717	3.04438e-06		0.585717	1.7841e-06		0.585717	1.9855e-06		0.585717	2.05424e-06		0.585717	2.12541e-06
0.588611	3.03394e-06		0.588611	3.01118e-06		0.588611	1.78143e-06		0.588611	1.98197e-06		0.588611	2.04979e-06		0.588611	2.12042e-06
0.591505	2.99961e-06		0.591505	2.97866e-06		0.591505	1.77876e-06		0.591505	1.97846e-06		0.591505	2.04534e-06		0.591505	2.11544e-06
0.594399	2.96656e-06		0.594399	2.94682e-06		0.594399	1.7761e-06		0.594399	1.97496e-06		0.594399	2.04093e-06		0.594399	2.11049e-06
0.597293	2.93445e-06		0.597293	2.91585e-06		0.597293	1.77343e-06		0.597293	1.97147e-06		0.597293	2.03655e-06		0.597293	2.10556e-06
0.600186	2.90281e-06		0.600186	2.88597e-06		0.600186	1.77076e-06		0.600186	1.968e-06		0.600186	2.0322e-06		0.600186	2.10064e-06
0.60308	2.87127e-06		0.60308	2.85705e-06		0.60308	1.76809e-06		0.60308	1.96455e-06		0.60308	2.02787e-06		0.60308	2.09574e-06
0.605974	2.83977e-06		0.605974	2.82893e-06		0.605974	1.76542e-06		0.605974	1.96111e-06		0.605974	2.02358e-06		0.605974	2.09086e-06
0.608868	2.80902e-06		0.608868	2.80147e-06		0.608868	1.76274e-06		0.608868	1.95768e-06		0.608868	2.01931e-06		0.608868	2.086e-06
0.611762	2.77962e-06		0.611762	2.77452e-06		0.611762	1.76008e-06		0.611762	1.95428e-06		0.611762	2.01508e-06		0.611762	2.08116e-06
0.614656	2.75142e-06		0.614656	2.74804e-06		0.614656	1.75741e-06		0.614656	1.95088e-06		0.614656	2.01088e-06		0.614656	2.07633e-06
0.61755	2.72425e-06		0.61755	2.72226e-06		0.61755	1.75474e-06		0.61755	1.94751e-06		0.61755	2.00671e-06		0.61755	2.07152e-06
0.620444	2.69784e-06		0.620444	2.69736e-06		0.620444	1.75208e-06		0.620444	1.94415e-06		0.620444	2.00258e-06		0.620444	2.06674e-06
0.623338	2.67191e-06		0.623338	2.67329e-06		0.623338	1.74942e-06		0.623338	1.94081e-06		0.623338	1.99848e-06		0.623338	2.06197e-06
0.626231	2.6465e-06		0.626231	2.65e-06		0.626231	1.74676e-06		0.626231	1.93749e-06		0.626231	1.99441e-06		0.626231	2.05722e-06
0.629125	2.62172e-06		0.629125	2.62746e-06		0.629125	1.74411e-06		0.629125	1.93418e-06		0.629125	1.99039e-06		0.629125	2.05249e-06
0.632019	2.59733e-06		0.632019	2.6057e-06		0.632019	1.74146e-06		0.632019	1.9309e-06		0.632019	1.9864e-06		0.632019	2.04779e-06
0.634913	2.57309e-06		0.634913	2.58459e-06		0.634913	1.73882e-06		0.634913	1.92763e-06		0.634913	1.98246e-06		0.634913	2.0431e-06
0.637807	2.54932e-06		0.637807	2.56411e-06		0.637807	1.73619e-06		0.637807	1.92439e-06		0.637807	1.97856e-06		0.637807	2.03844e-06
0.640701	2.52643e-06		0.640701	2.54423e-06		0.640701	1.73356e-06		0.640701	1.92117e-06		0.640701	1.9747e-06		0.640701	2.03381e-06
0.643595	2.50417e-06		0.643595	2.52482e-06		0.643595	1.73096e-06		0.643595	1.91799e-06		0.643595	1.97085e-06		0.643595	2.02921e-06
0.643595	2.50417e-06		0.643595	2.52482e-06		0.643595	1.73096e-06		0.643595	1.91799e-06		0.643595	1.97085e-06		0.643595	2.02921e-06
0.646489	2.48247e-06		0.646489	2.50591e-06		0.646489	1.72839e-06		0.646489	1.91482e-06		0.646489	1.967e-06		0.646489	2.02463e-06
0.649383	2.46142e-06		0.649383	2.48759e-06		0.649383	1.72582e-06		0.649383	1.91166e-06		0.649383	1.96316e-06		0.649383	2.02006e-06
0.652277	2.44101e-06		0.652277	2.46981e-06		0.652277	1.72325e-06		0.652277	1.90851e-06		0.652277	1.95932e-06		0.652277	2.01551e-06
0.65517	2.42113e-06		0.65517	2.4525e-06		0.65517	1.72069e-06		0.65517	1.90536e-06		0.65517	1.95548e-06		0.65517	2.01098e-06
0.658064	2.40181e-06		0.658064	2.43566e-06		0.658064	1.71814e-06		0.658064	1.90222e-06		0.658064	1.95165e-06		0.658064	2.00645e-06
0.660958	2.3831e-06		0.660958	2.4193e-06		0.660958	1.71558e-06		0.660958	1.89908e-06		0.660958	1.94781e-06		0.660958	2.00193e-06
0.663852	2.36496e-06		0.663852	2.40336e-06		0.663852	1.71303e-06		0.663852	1.89595e-06		0.663852	1.94397e-06		0.663852	1.99742e-06
0.666746	2.34732e-06		0.666746	2.38777e-06		0.666746	1.71048e-06		0.666746	1.89282e-06		0.666746	1.94013e-06		0.666746	1.99291e-06
0.66964	2.33021e-06		0.66964	2.37257e-06		0.66964	1.70793e-06		0.66964	1.88969e-06		0.66964	1.93629e-06		0.66964	1.98841e-06
0.672534	2.31368e-06		0.672534	2.3578e-06		0.672534	1.70537e-06		0.672534	1.88656e-06		0.672534	1.93245e-06		0.672534	1.98391e-06
0.675428	2.29766e-06		0.675428	2.3434e-06		0.675428	1.70282e-06		0.675428	1.88343e-06		0.675428	1.92861e-06		0.675428	1.97942e-06
0.678322	2.28208e-06		0.678322	2.32935e-06		0.678322	1.70027e-06		0.678322	1.8803e-06		0.678322	1.92476e-06		0.678322	1.97493e-06
0.681215	2.267e-06		0.681215	2.31565e-06		0.681215	1.69772e-06		0.681215	1.87717e-06		0.681215	1.92091e-06		0.681215	1.97043e-06
0.684109	2.25244e-06		0.684109	2.30233e-06		0.684109	1.69517e-06		0.684109	1.87405e-06		0.684109	1.91706e-06		0.684109	1.96594e-06
0.687003	2.23836e-06		0.687003	2.28938e-06		0.687003	1.69262e-06		0.687003	1.87092e-06		0.687003	1.91321e-06		0.687003	1.96145e-06
0.689897	2.22468e-06		0.689897	2.27675e-06		0.689897	1.69007e-06		0.689897	1.86779e-06		0.689897	1.90935e-06		0.689897	1.95697e-06
0.692791	2.21142e-06		0.692791	2.26441e-06		0.692791	1.68752e-06		0.692791	1.86466e-06		0.692791	1.90548e-06		0.692791	1.95248e-06
0.695685	2.19861e-06		0.695685	2.25232e-06		0.695685	1.68497e-06		0.695685	1.86153e-06		0.695685	1.90161e-06		0.695685	1.948e-06
0.698579	2.18623e-06		0.698579	2.24052e-06		0.698579	1.68242e-06		0.698579	1.85839e-06		0.698579	1.89774e-06		0.698579	1.94351e-06
0.701473	2.17422e-06		0.701473	2.22905e-06		0.701473	1.67986e-06		0.701473	1.85525e-06		0.701473	1.89386e-06		0.701473	1.93902e-06
0.704367	2.16256e-06		0.704367	2.21788e-06		0.704367	1.67731e-06		0.704367	1.85211e-06		0.704367	1.88998e-06		0.704367	1.93454e-06
0.70726	2.15124e-06		0.70726	2.207e-06		0.70726	1.67474e-06		0.70726	1.84896e-06		0.70726	1.88609e-06		0.70726	1.93004e-06
0.710154	2.14032e-06		0.710154	2.19637e-06		0.710154	1.67217e-06		0.710154	1.84581e-06		0.710154	1.8822e-06		0.710154	1.92555e-06
0.713048	2.12984e-06		0.713048	2.18601e-06		0.713048	1.66958e-06		0.713048	1.84264e-06		0.713048	1.8783e-06		0.713048	1.92105e-06
0.715942	2.1198e-06		0.715942	2.17597e-06		0.715942	1.66698e-06		0.715942	1.83947e-06		0.715942	1.8744e-06		0.715942	1.91656e-06
0.715942	2.1198e-06		0.715942	2.17597e-06		0.715942	1.66698e-06		0.715942	1.83947e-06		0.715942	1.8744e-06		0.715942	1.91656e-06
0.718836	2.11009e-06		0.718836	2.16627e-06		0.718836	1.66437e-06		0.718836	1.83629e-06		0.718836	1.87048e-06		0.718836	1.91205e-06
0.72173	2.10063e-06		0.72173	2.1568e-06		0.72173	1.66177e-06		0.72173	1.83309e-06		0.72173	1.86654e-06		0.72173	1.90751e-06
0.724624	2.09139e-06		0.724624	2.14754e-06		0.724624	1.65918e-06		0.724624	1.82987e-06		0.724624	1.86258e-06		0.724624	1.90295e-06
0.727518	2.08239e-06		0.727518	2.13845e-06		0.727518	1.65658e-06		0.727518	1.82663e-06		0.727518	1.85859e-06		0.727518	1.89835e-06
0.730412	2.07364e-06		0.730412	2.12951e-06		0.730412	1.65397e-06		0.730412	1.82336e-06		0.730412	1.85456e-06		0.730412	1.89372e-06
0.733305	2.0651e-06		0.733305	2.1207e-06		0.733305	1.65135e-06		0.733305	1.82006e-06		0.733305	1.8505e-06		0.733305	1.88903e-06
0.736199	2.05673e-06		0.736199	2.11202e-06		0.736199	1.6487e-06		0.736199	1.81673e-06		0.736199	1.84638e-06		0.736199	1.88427e-06
0.739093	2.04849e-06		0.739093	2.10347e-06		0.739093	1.64604e-06		0.739093	1.81335e-06		0.739093	1.84222e-06		0.739093	1.87944e-06
0.741987	2.04034e-06		0.741987	2.09503e-06		0.741987	1.64336e-06		0.741987	1.80993e-06		0.741987	1.838e-06		0.741987	1.87453e-06
0.744881	2.03225e-06		0.744881	2.08667e-06		0.744881	1.64064e-06		0.744881	1.80645e-06		0.744881	1.83372e-06		0.744881	1.86951e-06
0.747775	2.02422e-06		0.747775	2.07835e-06		0.747775	1.63789e-06		0.747775	1.80291e-06		0.747775	1.82936e-06		0.747775	1.86439e-06
0.750669	2.01629e-06		0.750669	2.07004e-06		0.750669	1.63509e-06		0.750669	1.79929e-06		0.750669	1.82491e-06		0.750669	1.85915e-06
0.753563	2.00844e-06		0.753563	2.0617e-06		0.753563	1.63224e-06		0.753563	1.79558e-06		0.753563	1.82033e-06		0.753563	1.85377e-06
0.756457	2.00064e-06		0.756457	2.05334e-06		0.756457	1.62933e-06		0.756457	1.79178e-06		0.756457	1.8156e-06		0.756457	1.84824e-06
0.75935	1.99284e-06		0.75935	2.04495e-06		0.75935	1.62635e-06		0.75935	1.78787e-06		0.75935	1.81073e-06		0.75935	1.84254e-06
0.762244	1.98501e-06		0.762244	2.03652e-06		0.762244	1.62329e-06		0.762244	1.78384e-06		0.762244	1.80568e-06		0.762244	1.83665e-06
0.765138	1.97712e-06		0.765138	2.02804e-06		0.765138	1.62013e-06		0.765138	1.77967e-06		0.765138	1.80044e-06		0.765138	1.83056e-06
0.768032	1.96913e-06		0.768032	2.01948e-06		0.768032	1.61686e-06		0.768032	1.77536e-06		0.768032	1.79499e-06		0.768032	1.82425e-06
0.770926	1.96105e-06		0.770926	2.01079e-06		0.770926	1.61347e-06		0.770926	1.77088e-06		0.770926	1.78932e-06		0.770926	1.8177e-06
0.77382	1.9529e-06		0.77382	2.00195e-06		0.77382	1.60995e-06		0.77382	1.76623e-06		0.77382	1.78342e-06		0.77382	1.8109e-06
0.776714	1.94465e-06		0.776714	1.99293e-06		0.776714	1.60628e-06		0.776714	1.76139e-06		0.776714	1.77726e-06		0.776714	1.80381e-06
0.779608	1.93629e-06		0.779608	1.98371e-06		0.779608	1.60246e-06		0.779608	1.75633e-06		0.779608	1.77084e-06		0.779608	1.79642e-06
0.782502	1.9278e-06		0.782502	1.97431e-06		0.782502	1.59847e-06		0.782502	1.75105e-06		0.782502	1.76416e-06		0.782502	1.78871e-06
0.785396	1.91917e-06		0.785396	1.96473e-06		0.785396	1.59433e-06		0.785396	1.74554e-06		0.785396	1.75721e-06		0.785396	1.7807e-06
0.788289	1.9104e-06		0.788289	1.95498e-06		0.788289	1.59002e-06		0.788289	1.73981e-06		0.788289	1.74998e-06		0.788289	1.77237e-06
0.791183	1.90148e-06		0.791183	1.94508e-06		0.791183	1.58554e-06		0.791183	1.73385e-06		0.791183	1.74248e-06		0.791183	1.76374e-06
0.794077	1.89246e-06		0.794077	1.93503e-06		0.794077	1.58089e-06		0.794077	1.72766e-06		0.794077	1.7347e-06		0.794077	1.75483e-06
0.796971	1.88341e-06		0.796971	1.92488e-06		0.796971	1.57607e-06		0.796971	1.72124e-06		0.796971	1.72663e-06		0.796971	1.74563e-06
0.799865	1.87434e-06		0.799865	1.91464e-06		0.799865	1.57105e-06		0.799865	1.71456e-06		0.799865	1.71828e-06		0.799865	1.73618e-06
0.799865	1.87434e-06		0.799865	1.91464e-06		0.799865	1.57105e-06		0.799865	1.71456e-06		0.799865	1.71828e-06		0.799865	1.73618e-06
0.802759	1.86521e-06		0.802759	1.90431e-06		0.802759	1.56582e-06		0.802759	1.7076e-06		0.802759	1.70961e-06		0.802759	1.72642e-06
0.805653	1.85596e-06		0.805653	1.89388e-06		0.805653	1.56034e-06		0.805653	1.70034e-06		0.805653	1.7006e-06		0.805653	1.71631e-06
0.808547	1.84663e-06		0.808547	1.88335e-06		0.808547	1.5546e-06		0.808547	1.69278e-06		0.808547	1.69123e-06		0.808547	1.70585e-06
0.811441	1.83725e-06		0.811441	1.87275e-06		0.811441	1.54859e-06		0.811441	1.68493e-06		0.811441	1.68152e-06		0.811441	1.69507e-06
0.814334	1.82782e-06		0.814334	1.86207e-06		0.814334	1.54229e-06		0.814334	1.67675e-06		0.814334	1.67147e-06		0.814334	1.68398e-06
0.817228	1.81837e-06		0.817228	1.85129e-06		0.817228	1.53571e-06		0.817228	1.66824e-06		0.817228	1.66108e-06		0.817228	1.67258e-06
0.820122	1.80891e-06		0.820122	1.84042e-06		0.820122	1.52883e-06		0.820122	1.65936e-06		0.820122	1.65035e-06		0.820122	1.6609e-06
0.823016	1.79945e-06		0.823016	1.82946e-06		0.823016	1.52165e-06		0.823016	1.65012e-06		0.823016	1.63931e-06		0.823016	1.64894e-06
0.82591	1.78997e-06		0.82591	1.81842e-06		0.82591	1.51417e-06		0.82591	1.64052e-06		0.82591	1.62795e-06		0.82591	1.63672e-06
0.828804	1.78046e-06		0.828804	1.80728e-06		0.828804	1.50639e-06		0.828804	1.63057e-06		0.828804	1.6163e-06		0.828804	1.62426e-06
0.831698	1.7709e-06		0.831698	1.79606e-06		0.831698	1.49828e-06		0.831698	1.62027e-06		0.831698	1.60436e-06		0.831698	1.61159e-06
0.834592	1.76129e-06		0.834592	1.78471e-06		0.834592	1.48978e-06		0.834592	1.60964e-06		0.834592	1.59216e-06		0.834592	1.59872e-06
0.837486	1.75165e-06		0.837486	1.77323e-06		0.837486	1.48091e-06		0.837486	1.59871e-06		0.837486	1.57973e-06		0.837486	1.5857e-06
0.840379	1.74201e-06		0.840379	1.76167e-06		0.840379	1.47168e-06		0.840379	1.58749e-06		0.840379	1.56711e-06		0.840379	1.57257e-06
0.843273	1.73239e-06		0.843273	1.7501e-06		0.843273	1.46212e-06		0.843273	1.57599e-06		0.843273	1.55433e-06		0.843273	1.55937e-06
0.846167	1.72282e-06		0.846167	1.73853e-06		0.846167	1.45227e-06		0.846167	1.56425e-06		0.846167	1.54144e-06		0.846167	1.54616e-06
0.849061	1.71333e-06		0.849061	1.72703e-06		0.849061	1.44219e-06		0.849061	1.55234e-06		0.849061	1.5285e-06		0.849061	1.53299e-06
0.851955	1.70393e-06		0.851955	1.71561e-06		0.851955	1.43193e-06		0.851955	1.54032e-06		0.851955	1.51557e-06		0.851955	1.51992e-06
0.854849	1.69468e-06		0.854849	1.70435e-06		0.854849	1.42155e-06		0.854849	1.52828e-06		0.854849	1.50275e-06		0.854849	1.50705e-06
0.857743	1.68564e-06		0.857743	1.69331e-06		0.857743	1.41114e-06		0.857743	1.51632e-06		0.857743	1.49016e-06		0.857743	1.49448e-06
0.860637	1.67692e-06		0.860637	1.68264e-06		0.860637	1.40081e-06		0.860637	1.50455e-06		0.860637	1.47792e-06		0.860637	1.48231e-06
0.863531	1.66869e-06		0.863531	1.67253e-06		0.863531	1.3907e-06		0.863531	1.49313e-06		0.863531	1.46616e-06		0.863531	1.47068e-06
0.866424	1.66107e-06		0.866424	1.66316e-06		0.866424	1.38103e-06		0.866424	1.48229e-06		0.866424	1.45507e-06		0.866424	1.45977e-06
0.869318	1.6543e-06		0.869318	1.65478e-06		0.869318	1.3721e-06		0.869318	1.47233e-06		0.869318	1.44495e-06		0.869318	1.44986e-06
0.872212	1.64861e-06		0.872212	1.64774e-06		0.872212	1.36434e-06		0.872212	1.46374e-06		0.872212	1.43628e-06		0.872212	1.44142e-06
0.875106	1.64443e-06		0.875106	1.64255e-06		0.875106	1.35849e-06		0.875106	1.45729e-06		0.875106	1.42985e-06		0.875106	1.43519e-06
0.878	1.64281e-06		0.878	1.64053e-06		0.878	1.35615e-06		0.878	1.45473e-06		0.878	1.42732e-06		0.878	1.43274e-06

## Sheet: no distribution 
SN 0			SN 0.2			SN 0.4			SN 0.6			SN 0.8			SN 1
Axial distance	no mass fraction		Axial distance	no mass fraction		Axial distance	no mass fraction		Axial distance	no mass fraction		Axial distance	no mass fraction		Axial distance	no mass fraction
0.00115113	3.71009e-06		0.00115113	3.75385e-06		0.00115113	1.56076e-06		0.00115113	4.01873e-07		0.00115113	2.90208e-07		0.00115113	1.50513e-07
0.00404502	5.27459e-06		0.00404502	5.37393e-06		0.00404502	1.81324e-06		0.00404502	5.46544e-07		0.00404502	3.23229e-07		0.00404502	1.65766e-07
0.00693891	7.17087e-06		0.00693891	7.30427e-06		0.00693891	2.01214e-06		0.00693891	6.89811e-07		0.00693891	3.49524e-07		0.00693891	1.75083e-07
0.0098328	9.30748e-06		0.0098328	9.40062e-06		0.0098328	2.17372e-06		0.0098328	8.22062e-07		0.0098328	3.66496e-07		0.0098328	1.76941e-07
0.0127267	1.16011e-05		0.0127267	1.1537e-05		0.0127267	2.32579e-06		0.0127267	9.30412e-07		0.0127267	3.72803e-07		0.0127267	1.70995e-07
0.0156206	1.39421e-05		0.0156206	1.35652e-05		0.0156206	2.50749e-06		0.0156206	1.00889e-06		0.0156206	3.68203e-07		0.0156206	1.59316e-07
0.0185145	1.61921e-05		0.0185145	1.5329e-05		0.0185145	2.73424e-06		0.0185145	1.05046e-06		0.0185145	3.55433e-07		0.0185145	1.44564e-07
0.0214084	1.8219e-05		0.0214084	1.67106e-05		0.0214084	2.99245e-06		0.0214084	1.05245e-06		0.0214084	3.35642e-07		0.0214084	1.28991e-07
0.0243023	1.99219e-05		0.0243023	1.76513e-05		0.0243023	3.25203e-06		0.0243023	1.0206e-06		0.0243023	3.10133e-07		0.0243023	1.18078e-07
0.0271961	2.12247e-05		0.0271961	1.81476e-05		0.0271961	3.48174e-06		0.0271961	9.61742e-07		0.0271961	2.84505e-07		0.0271961	1.16521e-07
0.03009	2.20992e-05		0.03009	1.82407e-05		0.03009	3.66132e-06		0.03009	8.87207e-07		0.03009	2.66947e-07		0.03009	1.24907e-07
0.0329839	2.25598e-05		0.0329839	1.8008e-05		0.0329839	3.78364e-06		0.0329839	8.07619e-07		0.0329839	2.67564e-07		0.0329839	1.45492e-07
0.0358778	2.26458e-05		0.0358778	1.75348e-05		0.0358778	3.85061e-06		0.0358778	7.44933e-07		0.0358778	2.99339e-07		0.0358778	1.82477e-07
0.0387717	2.24212e-05		0.0387717	1.6896e-05		0.0387717	3.87827e-06		0.0387717	7.40014e-07		0.0387717	3.99273e-07		0.0387717	2.40306e-07
0.0416656	2.19554e-05		0.0416656	1.61638e-05		0.0416656	3.86559e-06		0.0416656	8.85049e-07		0.0416656	6.59154e-07		0.0416656	3.27013e-07
0.0445595	2.13104e-05		0.0445595	1.54055e-05		0.0445595	3.80631e-06		0.0445595	1.4631e-06		0.0445595	1.28343e-06		0.0445595	4.64564e-07
0.0474534	2.05447e-05		0.0474534	1.46818e-05		0.0474534	3.7199e-06		0.0474534	3.23388e-06		0.0474534	2.81094e-06		0.0474534	7.13991e-07
0.0503473	1.97097e-05		0.0503473	1.40488e-05		0.0503473	3.60736e-06		0.0503473	7.71875e-06		0.0503473	6.15874e-06		0.0503473	1.25143e-06
0.0532412	1.88503e-05		0.0532412	1.35549e-05		0.0532412	3.46203e-06		0.0532412	1.75853e-05		0.0532412	1.3257e-05		0.0532412	2.48911e-06
0.056135	1.8007e-05		0.056135	1.32309e-05		0.056135	3.29394e-06		0.056135	3.86504e-05		0.056135	2.81422e-05		0.056135	5.203e-06
0.0590289	1.72161e-05		0.0590289	1.30823e-05		0.0590289	3.11478e-06		0.0590289	8.12779e-05		0.0590289	5.80216e-05		0.0590289	1.08875e-05
0.0619228	1.6509e-05		0.0619228	1.30921e-05		0.0619228	2.93962e-06		0.0619228	0.000158434		0.0619228	0.00011351		0.0619228	2.24882e-05
0.0648167	1.5911e-05		0.0648167	1.3237e-05		0.0648167	2.8152e-06		0.0648167	0.000277083		0.0648167	0.000203805		0.0648167	4.50343e-05
0.0677106	1.54409e-05		0.0677106	1.3496e-05		0.0677106	2.85284e-06		0.0677106	0.000425988		0.0677106	0.000325541		0.0677106	8.56793e-05
0.0706045	1.51108e-05		0.0706045	1.38475e-05		0.0706045	3.39198e-06		0.0706045	0.000574789		0.0706045	0.000455492		0.0706045	0.000151596
0.0734984	1.49264e-05		0.0734984	1.42623e-05		0.0734984	5.32543e-06		0.0734984	0.000634338		0.0734984	0.00052041		0.0734984	0.000244127
0.0763923	1.48852e-05		0.0763923	1.47105e-05		0.0763923	1.04542e-05		0.0763923	0.000580116		0.0763923	0.000483548		0.0763923	0.000353941
0.0792862	1.49762e-05		0.0792862	1.51653e-05		0.0792862	2.19217e-05		0.0792862	0.00049199		0.0792862	0.000405742		0.0792862	0.000461264
0.0821801	1.5188e-05		0.0821801	1.56028e-05		0.0821801	4.45384e-05		0.0821801	0.000411089		0.0821801	0.000336747		0.0821801	0.000493732
0.085074	1.55116e-05		0.085074	1.60043e-05		0.085074	8.4382e-05		0.085074	0.000343525		0.085074	0.000283438		0.085074	0.000442744
0.085074	1.55116e-05		0.085074	1.60043e-05		0.085074	8.4382e-05		0.085074	0.000343525		0.085074	0.000283438		0.085074	0.000442744
0.0879678	1.59378e-05		0.0879678	1.63564e-05		0.0879678	0.000147079		0.0879678	0.000288823		0.0879678	0.000242248		0.0879678	0.000378699
0.0908617	1.64605e-05		0.0908617	1.66531e-05		0.0908617	0.000235118		0.0908617	0.000245354		0.0908617	0.000210065		0.0908617	0.000323686
0.0937556	1.70508e-05		0.0937556	1.68924e-05		0.0937556	0.000345841		0.0937556	0.000209918		0.0937556	0.000184805		0.0937556	0.000280243
0.0966495	1.76904e-05		0.0966495	1.70762e-05		0.0966495	0.000471781		0.0966495	0.000180974		0.0966495	0.000164995		0.0966495	0.00024662
0.0995434	1.83569e-05		0.0995434	1.72109e-05		0.0995434	0.000601645		0.0995434	0.000157494		0.0995434	0.000149315		0.0995434	0.00022085
0.102437	1.90345e-05		0.102437	1.73055e-05		0.102437	0.000705085		0.102437	0.00013836		0.102437	0.000136855		0.102437	0.000201027
0.105331	1.97073e-05		0.105331	1.73703e-05		0.105331	0.000726981		0.105331	0.000122741		0.105331	0.00012695		0.105331	0.000185625
0.108225	2.03572e-05		0.108225	1.74179e-05		0.108225	0.000667293		0.108225	0.000109993		0.108225	0.000119088		0.108225	0.000173658
0.111119	2.09726e-05		0.111119	1.74613e-05		0.111119	0.000577413		0.111119	9.96288e-05		0.111119	0.000112855		0.111119	0.000164348
0.114013	2.15349e-05		0.114013	1.75113e-05		0.114013	0.000485894		0.114013	9.12309e-05		0.114013	0.000107913		0.114013	0.0001571
0.116907	2.20553e-05		0.116907	1.75787e-05		0.116907	0.000404174		0.116907	8.4416e-05		0.116907	0.000104016		0.116907	0.000151465
0.119801	2.25218e-05		0.119801	1.76757e-05		0.119801	0.000335505		0.119801	7.89036e-05		0.119801	0.00010096		0.119801	0.000147093
0.122695	2.29232e-05		0.122695	1.78161e-05		0.122695	0.000279498		0.122695	7.44838e-05		0.122695	9.8577e-05		0.122695	0.000143722
0.125588	2.32895e-05		0.125588	1.80102e-05		0.125588	0.000234249		0.125588	7.09781e-05		0.125588	9.67236e-05		0.125588	0.000141131
0.128482	2.36145e-05		0.128482	1.8256e-05		0.128482	0.000197588		0.128482	6.8209e-05		0.128482	9.52839e-05		0.128482	0.000139132
0.131376	2.38708e-05		0.131376	1.85487e-05		0.131376	0.000167782		0.131376	6.60237e-05		0.131376	9.41639e-05		0.131376	0.000137579
0.13427	2.40648e-05		0.13427	1.88807e-05		0.13427	0.000143476		0.13427	6.43163e-05		0.13427	9.32881e-05		0.13427	0.00013636
0.137164	2.42052e-05		0.137164	1.92499e-05		0.137164	0.000123657		0.137164	6.29959e-05		0.137164	9.2597e-05		0.137164	0.000135387
0.140058	2.42979e-05		0.140058	1.96628e-05		0.140058	0.000107469		0.140058	6.19852e-05		0.140058	9.20445e-05		0.140058	0.000134595
0.142952	2.43494e-05		0.142952	2.01237e-05		0.142952	9.42324e-05		0.142952	6.12193e-05		0.142952	9.15948e-05		0.142952	0.000133934
0.145846	2.43685e-05		0.145846	2.06327e-05		0.145846	8.34789e-05		0.145846	6.06448e-05		0.145846	9.1221e-05		0.145846	0.000133369
0.14874	2.43616e-05		0.14874	2.11743e-05		0.14874	7.47043e-05		0.14874	6.02181e-05		0.14874	9.09029e-05		0.14874	0.000132872
0.151633	2.43351e-05		0.151633	2.17403e-05		0.151633	6.74494e-05		0.151633	5.99043e-05		0.151633	9.06256e-05		0.151633	0.000132423
0.154527	2.42954e-05		0.154527	2.2317e-05		0.154527	6.14579e-05		0.154527	5.96762e-05		0.154527	9.03785e-05		0.154527	0.000132009
0.157421	2.42485e-05		0.157421	2.28931e-05		0.157421	5.65328e-05		0.157421	5.95128e-05		0.157421	9.01539e-05		0.157421	0.00013162
0.160315	2.42003e-05		0.160315	2.34732e-05		0.160315	5.25036e-05		0.160315	5.93983e-05		0.160315	8.99511e-05		0.160315	0.000131249
0.163209	2.4156e-05		0.163209	2.40541e-05		0.163209	4.92445e-05		0.163209	5.93208e-05		0.163209	8.9771e-05		0.163209	0.000130894
0.166103	2.41269e-05		0.166103	2.46418e-05		0.166103	4.66402e-05		0.166103	5.92709e-05		0.166103	8.961e-05		0.166103	0.000130554
0.166103	2.41269e-05		0.166103	2.46418e-05		0.166103	4.66402e-05		0.166103	5.92709e-05		0.166103	8.961e-05		0.166103	0.000130554
0.168997	2.41268e-05		0.168997	2.52458e-05		0.168997	4.455e-05		0.168997	5.92253e-05		0.168997	8.94444e-05		0.168997	0.000130203
0.171891	2.41557e-05		0.171891	2.58565e-05		0.171891	4.28556e-05		0.171891	5.91663e-05		0.171891	8.9257e-05		0.171891	0.000129819
0.174785	2.42075e-05		0.174785	2.64702e-05		0.174785	4.14927e-05		0.174785	5.90953e-05		0.174785	8.90544e-05		0.174785	0.000129411
0.177678	2.42819e-05		0.177678	2.70903e-05		0.177678	4.04038e-05		0.177678	5.90132e-05		0.177678	8.88401e-05		0.177678	0.000128982
0.180572	2.43785e-05		0.180572	2.77113e-05		0.180572	3.95389e-05		0.180572	5.89206e-05		0.180572	8.86164e-05		0.180572	0.000128534
0.183466	2.44973e-05		0.183466	2.83251e-05		0.183466	3.88545e-05		0.183466	5.88182e-05		0.183466	8.83847e-05		0.183466	0.000128069
0.18636	2.46439e-05		0.18636	2.89277e-05		0.18636	3.83141e-05		0.18636	5.87069e-05		0.18636	8.81461e-05		0.18636	0.000127587
0.189254	2.48259e-05		0.189254	2.95192e-05		0.189254	3.7887e-05		0.189254	5.85873e-05		0.189254	8.79009e-05		0.189254	0.00012709
0.192148	2.50391e-05		0.192148	3.00988e-05		0.192148	3.75482e-05		0.192148	5.84603e-05		0.192148	8.76495e-05		0.192148	0.000126578
0.195042	2.52752e-05		0.195042	3.06677e-05		0.195042	3.72776e-05		0.195042	5.83265e-05		0.195042	8.73921e-05		0.195042	0.000126052
0.197936	2.55362e-05		0.197936	3.12296e-05		0.197936	3.70592e-05		0.197936	5.81866e-05		0.197936	8.71287e-05		0.197936	0.000125512
0.20083	2.58261e-05		0.20083	3.17825e-05		0.20083	3.68804e-05		0.20083	5.80411e-05		0.20083	8.68591e-05		0.20083	0.00012496
0.203723	2.61474e-05		0.203723	3.23269e-05		0.203723	3.67314e-05		0.203723	5.78905e-05		0.203723	8.65832e-05		0.203723	0.000124396
0.206617	2.6501e-05		0.206617	3.28745e-05		0.206617	3.6605e-05		0.206617	5.77351e-05		0.206617	8.63006e-05		0.206617	0.000123819
0.209511	2.68878e-05		0.209511	3.34383e-05		0.209511	3.64956e-05		0.209511	5.75751e-05		0.209511	8.60105e-05		0.209511	0.000123231
0.212405	2.73083e-05		0.212405	3.40301e-05		0.212405	3.6398e-05		0.212405	5.74105e-05		0.212405	8.57115e-05		0.212405	0.000122628
0.215299	2.77634e-05		0.215299	3.46609e-05		0.215299	3.63073e-05		0.215299	5.72409e-05		0.215299	8.54015e-05		0.215299	0.000122008
0.215299	2.77634e-05		0.215299	3.46609e-05		0.215299	3.63073e-05		0.215299	5.72409e-05		0.215299	8.54015e-05		0.215299	0.000122008
0.218193	2.82572e-05		0.218193	3.53476e-05		0.218193	3.62206e-05		0.218193	5.70683e-05		0.218193	8.50831e-05		0.218193	0.000121377
0.221087	2.8794e-05		0.221087	3.61058e-05		0.221087	3.61357e-05		0.221087	5.68956e-05		0.221087	8.47613e-05		0.221087	0.000120744
0.223981	2.93746e-05		0.223981	3.69436e-05		0.223981	3.60512e-05		0.223981	5.6724e-05		0.223981	8.44371e-05		0.223981	0.000120111
0.226875	2.99987e-05		0.226875	3.78624e-05		0.226875	3.59663e-05		0.226875	5.65536e-05		0.226875	8.41099e-05		0.226875	0.000119478
0.229768	3.06633e-05		0.229768	3.88727e-05		0.229768	3.58806e-05		0.229768	5.63843e-05		0.229768	8.37784e-05		0.229768	0.000118843
0.232662	3.13736e-05		0.232662	3.9993e-05		0.232662	3.57939e-05		0.232662	5.62157e-05		0.232662	8.3441e-05		0.232662	0.000118218
0.235556	3.2123e-05		0.235556	4.12336e-05		0.235556	3.57059e-05		0.235556	5.60475e-05		0.235556	8.30961e-05		0.235556	0.000117615
0.23845	3.29013e-05		0.23845	4.25953e-05		0.23845	3.56167e-05		0.23845	5.58792e-05		0.23845	8.27427e-05		0.23845	0.000117029
0.241344	3.37118e-05		0.241344	4.40856e-05		0.241344	3.55263e-05		0.241344	5.57108e-05		0.241344	8.23875e-05		0.241344	0.000116459
0.244238	3.45542e-05		0.244238	4.57215e-05		0.244238	3.54347e-05		0.244238	5.55422e-05		0.244238	8.20362e-05		0.244238	0.000115905
0.247132	3.54292e-05		0.247132	4.7513e-05		0.247132	3.53419e-05		0.247132	5.53735e-05		0.247132	8.16874e-05		0.247132	0.000115365
0.250026	3.63344e-05		0.250026	4.94612e-05		0.250026	3.5248e-05		0.250026	5.52048e-05		0.250026	8.13406e-05		0.250026	0.000114841
0.25292	3.72709e-05		0.25292	5.15737e-05		0.25292	3.51531e-05		0.25292	5.50362e-05		0.25292	8.09954e-05		0.25292	0.000114331
0.255814	3.8249e-05		0.255814	5.38673e-05		0.255814	3.50571e-05		0.255814	5.48682e-05		0.255814	8.06517e-05		0.255814	0.000113837
0.258707	3.92743e-05		0.258707	5.63445e-05		0.258707	3.49601e-05		0.258707	5.4701e-05		0.258707	8.03095e-05		0.258707	0.000113357
0.261601	4.03486e-05		0.261601	5.90129e-05		0.261601	3.48621e-05		0.261601	5.45355e-05		0.261601	7.99688e-05		0.261601	0.000112894
0.264495	4.14742e-05		0.264495	6.18885e-05		0.264495	3.47633e-05		0.264495	5.43702e-05		0.264495	7.96296e-05		0.264495	0.000112448
0.267389	4.2656e-05		0.267389	6.49724e-05		0.267389	3.46636e-05		0.267389	5.42028e-05		0.267389	7.92921e-05		0.267389	0.00011202
0.270283	4.39056e-05		0.270283	6.82628e-05		0.270283	3.45631e-05		0.270283	5.40326e-05		0.270283	7.89565e-05		0.270283	0.000111612
0.273177	4.52369e-05		0.273177	7.17698e-05		0.273177	3.44618e-05		0.273177	5.38599e-05		0.273177	7.8623e-05		0.273177	0.000111227
0.276071	4.66647e-05		0.276071	7.55117e-05		0.276071	3.43596e-05		0.276071	5.36847e-05		0.276071	7.82919e-05		0.276071	0.000110866
0.278965	4.82076e-05		0.278965	7.94905e-05		0.278965	3.42568e-05		0.278965	5.35074e-05		0.278965	7.79634e-05		0.278965	0.000110533
0.281859	4.98856e-05		0.281859	8.37039e-05		0.281859	3.41532e-05		0.281859	5.33281e-05		0.281859	7.76378e-05		0.281859	0.000110202
0.284752	5.17113e-05		0.284752	8.81504e-05		0.284752	3.40489e-05		0.284752	5.31468e-05		0.284752	7.73156e-05		0.284752	0.000109845
0.287646	5.36996e-05		0.287646	9.28233e-05		0.287646	3.39438e-05		0.287646	5.29637e-05		0.287646	7.69973e-05		0.287646	0.000109468
0.29054	5.58696e-05		0.29054	9.77263e-05		0.29054	3.3838e-05		0.29054	5.27788e-05		0.29054	7.66837e-05		0.29054	0.000109069
0.293434	5.82358e-05		0.293434	0.000102874		0.293434	3.37314e-05		0.293434	5.25921e-05		0.293434	7.63756e-05		0.293434	0.00010865
0.296328	6.0812e-05		0.296328	0.000108281		0.296328	3.36239e-05		0.296328	5.24037e-05		0.296328	7.60744e-05		0.296328	0.00010821
0.299222	6.3616e-05		0.299222	0.000113954		0.299222	3.35157e-05		0.299222	5.22135e-05		0.299222	7.57809e-05		0.299222	0.00010775
0.302116	6.66664e-05		0.302116	0.000119899		0.302116	3.34064e-05		0.302116	5.20216e-05		0.302116	7.54798e-05		0.302116	0.000107269
0.30501	6.9982e-05		0.30501	0.000126135		0.30501	3.32962e-05		0.30501	5.18281e-05		0.30501	7.51561e-05		0.30501	0.000106767
0.307904	7.35781e-05		0.307904	0.000132689		0.307904	3.31847e-05		0.307904	5.16329e-05		0.307904	7.48109e-05		0.307904	0.000106243
0.310797	7.74661e-05		0.310797	0.000139599		0.310797	3.30718e-05		0.310797	5.1436e-05		0.310797	7.44444e-05		0.310797	0.000105698
0.313691	8.16664e-05		0.313691	0.000146906		0.313691	3.29572e-05		0.313691	5.12375e-05		0.313691	7.40571e-05		0.313691	0.00010513
0.313691	8.16664e-05		0.313691	0.000146906		0.313691	3.29572e-05		0.313691	5.12375e-05		0.313691	7.40571e-05		0.313691	0.00010513
0.316585	8.61959e-05		0.316585	0.000154671		0.316585	3.284e-05		0.316585	5.10366e-05		0.316585	7.36624e-05		0.316585	0.000104546
0.319479	9.10599e-05		0.319479	0.000162958		0.319479	3.27216e-05		0.319479	5.08326e-05		0.319479	7.32721e-05		0.319479	0.00010395
0.322373	9.627e-05		0.322373	0.000171819		0.322373	3.26041e-05		0.322373	5.06258e-05		0.322373	7.28842e-05		0.322373	0.000103339
0.325267	0.000101841		0.325267	0.000181293		0.325267	3.24872e-05		0.325267	5.04163e-05		0.325267	7.24971e-05		0.325267	0.000102721
0.328161	0.000107789		0.328161	0.000191417		0.328161	3.23711e-05		0.328161	5.02042e-05		0.328161	7.21098e-05		0.328161	0.000102101
0.331055	0.000114135		0.331055	0.000202238		0.331055	3.22557e-05		0.331055	4.99895e-05		0.331055	7.17215e-05		0.331055	0.000101478
0.333949	0.000120903		0.333949	0.000213799		0.333949	3.21411e-05		0.333949	4.97722e-05		0.333949	7.13317e-05		0.333949	0.000100854
0.336842	0.000128126		0.336842	0.000226139		0.336842	3.20272e-05		0.336842	4.95521e-05		0.336842	7.09399e-05		0.336842	0.000100228
0.339736	0.00013585		0.339736	0.000239309		0.339736	3.19142e-05		0.339736	4.9331e-05		0.339736	7.05457e-05		0.339736	9.96005e-05
0.34263	0.000144126		0.34263	0.000253362		0.34263	3.18018e-05		0.34263	4.91108e-05		0.34263	7.01485e-05		0.34263	9.89711e-05
0.345524	0.000153001		0.345524	0.000268349		0.345524	3.16903e-05		0.345524	4.88918e-05		0.345524	6.97477e-05		0.345524	9.83402e-05
0.348418	0.000162547		0.348418	0.000284366		0.348418	3.15794e-05		0.348418	4.86743e-05		0.348418	6.93425e-05		0.348418	9.77078e-05
0.351312	0.000172843		0.351312	0.000301541		0.351312	3.14694e-05		0.351312	4.84583e-05		0.351312	6.89316e-05		0.351312	9.70739e-05
0.354206	0.000183977		0.354206	0.000320004		0.354206	3.136e-05		0.354206	4.8244e-05		0.354206	6.85213e-05		0.354206	9.64385e-05
0.3571	0.00019604		0.3571	0.000339899		0.3571	3.12514e-05		0.3571	4.80315e-05		0.3571	6.81191e-05		0.3571	9.58015e-05
0.359994	0.000209093		0.359994	0.000361387		0.359994	3.11436e-05		0.359994	4.78209e-05		0.359994	6.77261e-05		0.359994	9.51626e-05
0.362887	0.000223185		0.362887	0.000384625		0.362887	3.10366e-05		0.362887	4.76123e-05		0.362887	6.73431e-05		0.362887	9.45218e-05
0.365781	0.000238371		0.365781	0.000409828		0.365781	3.09305e-05		0.365781	4.74058e-05		0.365781	6.69706e-05		0.365781	9.38868e-05
0.368675	0.000254705		0.368675	0.000437343		0.368675	3.08253e-05		0.368675	4.72017e-05		0.368675	6.66092e-05		0.368675	9.32651e-05
0.371569	0.000272237		0.371569	0.000467817		0.371569	3.0721e-05		0.371569	4.69999e-05		0.371569	6.62593e-05		0.371569	9.2657e-05
0.374463	0.000291019		0.374463	0.000501721		0.374463	3.06177e-05		0.374463	4.68007e-05		0.374463	6.59214e-05		0.374463	9.20631e-05
0.377357	0.000311154		0.377357	0.000539454		0.377357	3.05155e-05		0.377357	4.66041e-05		0.377357	6.55962e-05		0.377357	9.14838e-05
0.380251	0.00033278		0.380251	0.000582581		0.380251	3.04143e-05		0.380251	4.64101e-05		0.380251	6.5284e-05		0.380251	9.09198e-05
0.383145	0.000356017		0.383145	0.000632123		0.383145	3.03142e-05		0.383145	4.62188e-05		0.383145	6.49855e-05		0.383145	9.03715e-05
0.386039	0.000381034		0.386039	0.000689047		0.386039	3.02152e-05		0.386039	4.60301e-05		0.386039	6.47011e-05		0.386039	8.98393e-05
0.388932	0.000408124		0.388932	0.00075569		0.388932	3.01174e-05		0.388932	4.5844e-05		0.388932	6.44312e-05		0.388932	8.93234e-05
0.391826	0.000437636		0.391826	0.000835625		0.391826	3.00207e-05		0.391826	4.56602e-05		0.391826	6.41766e-05		0.391826	8.88236e-05
0.39472	0.000469837		0.39472	0.000932962		0.39472	2.99251e-05		0.39472	4.54787e-05		0.39472	6.39378e-05		0.39472	8.834e-05
0.397614	0.000504862		0.397614	0.00104749		0.397614	2.98306e-05		0.397614	4.52991e-05		0.397614	6.3716e-05		0.397614	8.78721e-05
0.400508	0.000542997		0.400508	0.00117426		0.400508	2.97373e-05		0.400508	4.51212e-05		0.400508	6.35124e-05		0.400508	8.74209e-05
0.403402	0.000584974		0.403402	0.00130341		0.403402	2.96452e-05		0.403402	4.49446e-05		0.403402	6.33108e-05		0.403402	8.69813e-05
0.403402	0.000584974		0.403402	0.00130341		0.403402	2.96452e-05		0.403402	4.49446e-05		0.403402	6.33108e-05		0.403402	8.69813e-05
0.406296	0.000631361		0.406296	0.0014242		0.406296	2.95527e-05		0.406296	4.47678e-05		0.406296	6.30966e-05		0.406296	8.65393e-05
0.40919	0.000683471		0.40919	0.00153402		0.40919	2.94583e-05		0.40919	4.45892e-05		0.40919	6.2872e-05		0.40919	8.60856e-05
0.412084	0.000743824		0.412084	0.00163108		0.412084	2.93615e-05		0.412084	4.44086e-05		0.412084	6.26362e-05		0.412084	8.56197e-05
0.414977	0.000815901		0.414977	0.0017114		0.414977	2.92626e-05		0.414977	4.42257e-05		0.414977	6.23892e-05		0.414977	8.51418e-05
0.417871	0.000902372		0.417871	0.0017755		0.417871	2.91616e-05		0.417871	4.40405e-05		0.417871	6.21311e-05		0.417871	8.46524e-05
0.420765	0.00100646		0.420765	0.00182574		0.420765	2.90585e-05		0.420765	4.38529e-05		0.420765	6.18624e-05		0.420765	8.41521e-05
0.423659	0.00112321		0.423659	0.00186269		0.423659	2.89536e-05		0.423659	4.36628e-05		0.423659	6.15839e-05		0.423659	8.36417e-05
0.426553	0.00124523		0.426553	0.00188609		0.426553	2.8847e-05		0.426553	4.34704e-05		0.426553	6.12962e-05		0.426553	8.3122e-05
0.429447	0.00136105		0.429447	0.00189524		0.429447	2.87389e-05		0.429447	4.32759e-05		0.429447	6.09998e-05		0.429447	8.25941e-05
0.432341	0.00145481		0.432341	0.00189394		0.432341	2.86296e-05		0.432341	4.30795e-05		0.432341	6.06955e-05		0.432341	8.20588e-05
0.435235	0.00152684		0.435235	0.00188448		0.435235	2.85192e-05		0.435235	4.28814e-05		0.435235	6.03838e-05		0.435235	8.15171e-05
0.438129	0.00158328		0.438129	0.00186478		0.438129	2.84081e-05		0.438129	4.26818e-05		0.438129	6.00651e-05		0.438129	8.09698e-05
0.441023	0.00162555		0.441023	0.00183623		0.441023	2.82964e-05		0.441023	4.24811e-05		0.441023	5.97396e-05		0.441023	8.04188e-05
0.443916	0.00165493		0.443916	0.00180118		0.443916	2.81843e-05		0.443916	4.22792e-05		0.443916	5.94075e-05		0.443916	7.98661e-05
0.44681	0.00167038		0.44681	0.00176019		0.44681	2.80719e-05		0.44681	4.20765e-05		0.44681	5.90688e-05		0.44681	7.93121e-05
0.449704	0.00167188		0.449704	0.00171392		0.449704	2.79594e-05		0.449704	4.1873e-05		0.449704	5.87259e-05		0.449704	7.87575e-05
0.452598	0.00166451		0.452598	0.00166405		0.452598	2.78469e-05		0.452598	4.16687e-05		0.452598	5.83814e-05		0.452598	7.82027e-05
0.455492	0.00164977		0.455492	0.00161128		0.455492	2.77344e-05		0.455492	4.14639e-05		0.455492	5.80356e-05		0.455492	7.76481e-05
0.458386	0.00162647		0.458386	0.00155631		0.458386	2.76222e-05		0.458386	4.12584e-05		0.458386	5.7689e-05		0.458386	7.70941e-05
0.46128	0.00159569		0.46128	0.00149974		0.46128	2.75103e-05		0.46128	4.10523e-05		0.46128	5.73417e-05		0.46128	7.6541e-05
0.464174	0.00155966		0.464174	0.00144217		0.464174	2.73988e-05		0.464174	4.08456e-05		0.464174	5.69939e-05		0.464174	7.59891e-05
0.467068	0.00151828		0.467068	0.00138418		0.467068	2.72878e-05		0.467068	4.06389e-05		0.467068	5.66458e-05		0.467068	7.54388e-05
0.469961	0.00147194		0.469961	0.00132621		0.469961	2.71775e-05		0.469961	4.04328e-05		0.469961	5.62975e-05		0.469961	7.48903e-05
0.472855	0.00142246		0.472855	0.00126862		0.472855	2.7068e-05		0.472855	4.02275e-05		0.472855	5.5949e-05		0.472855	7.43439e-05
0.475749	0.00137117		0.475749	0.00121161		0.475749	2.69594e-05		0.475749	4.00232e-05		0.475749	5.56004e-05		0.475749	7.37997e-05
0.478643	0.00131868		0.478643	0.00115547		0.478643	2.68519e-05		0.478643	3.98198e-05		0.478643	5.52518e-05		0.478643	7.32602e-05
0.481537	0.00126523		0.481537	0.00110064		0.481537	2.67456e-05		0.481537	3.96175e-05		0.481537	5.4903e-05		0.481537	7.27274e-05
0.484431	0.001211		0.484431	0.00104732		0.484431	2.66406e-05		0.484431	3.94163e-05		0.484431	5.45541e-05		0.484431	7.22019e-05
0.487325	0.00115644		0.487325	0.000995444		0.487325	2.65371e-05		0.487325	3.92164e-05		0.487325	5.42049e-05		0.487325	7.16841e-05
0.490219	0.0011024		0.490219	0.000945239		0.490219	2.64344e-05		0.490219	3.90177e-05		0.490219	5.38553e-05		0.490219	7.11744e-05
0.493113	0.0010494		0.493113	0.000896994		0.493113	2.63317e-05		0.493113	3.88204e-05		0.493113	5.35052e-05		0.493113	7.06735e-05
0.496006	0.000997757		0.496006	0.00085073		0.496006	2.62291e-05		0.496006	3.86246e-05		0.496006	5.31569e-05		0.496006	7.01818e-05
0.4989	0.000947597		0.4989	0.000806478		0.4989	2.61265e-05		0.4989	3.84303e-05		0.4989	5.28127e-05		0.4989	6.96999e-05
0.501794	0.000898793		0.501794	0.000764072		0.501794	2.6024e-05		0.501794	3.82377e-05		0.501794	5.24731e-05		0.501794	6.92285e-05
0.504688	0.000851395		0.504688	0.000723315		0.504688	2.59215e-05		0.504688	3.80469e-05		0.504688	5.21384e-05		0.504688	6.87683e-05
0.507582	0.000805763		0.507582	0.000684393		0.507582	2.58192e-05		0.507582	3.78581e-05		0.507582	5.18089e-05		0.507582	6.832e-05
0.510476	0.000761954		0.510476	0.000647304		0.510476	2.5717e-05		0.510476	3.76713e-05		0.510476	5.1485e-05		0.510476	6.78845e-05
0.51337	0.000719851		0.51337	0.000611822		0.51337	2.56148e-05		0.51337	3.74869e-05		0.51337	5.11674e-05		0.51337	6.74625e-05
0.516264	0.000679638		0.516264	0.000578027		0.516264	2.55127e-05		0.516264	3.73051e-05		0.516264	5.08568e-05		0.516264	6.7047e-05
0.519158	0.000641319		0.519158	0.000545995		0.519158	2.54105e-05		0.519158	3.71261e-05		0.519158	5.05542e-05		0.519158	6.66302e-05
0.522051	0.000604763		0.522051	0.0005156		0.522051	2.53084e-05		0.522051	3.69503e-05		0.522051	5.02607e-05		0.522051	6.62117e-05
0.524945	0.000570199		0.524945	0.000487162		0.524945	2.52061e-05		0.524945	3.67779e-05		0.524945	4.9978e-05		0.524945	6.57915e-05
0.524945	0.000570199		0.524945	0.000487162		0.524945	2.52061e-05		0.524945	3.67779e-05		0.524945	4.9978e-05		0.524945	6.57915e-05
0.527839	0.000537592		0.527839	0.000460744		0.527839	2.51039e-05		0.527839	3.66069e-05		0.527839	4.97013e-05		0.527839	6.53696e-05
0.530733	0.000506767		0.530733	0.000435858		0.530733	2.5002e-05		0.530733	3.64349e-05		0.530733	4.9425e-05		0.530733	6.49462e-05
0.533627	0.000477669		0.533627	0.000412364		0.533627	2.49005e-05		0.533627	3.62622e-05		0.533627	4.91486e-05		0.533627	6.45211e-05
0.536521	0.000450224		0.536521	0.000390179		0.536521	2.47995e-05		0.536521	3.60889e-05		0.536521	4.88717e-05		0.536521	6.4094e-05
0.539415	0.000424354		0.539415	0.000369212		0.539415	2.46988e-05		0.539415	3.59151e-05		0.539415	4.85937e-05		0.539415	6.36646e-05
0.542309	0.000399975		0.542309	0.000349431		0.542309	2.45986e-05		0.542309	3.57409e-05		0.542309	4.83154e-05		0.542309	6.32324e-05
0.545203	0.000376954		0.545203	0.000330847		0.545203	2.44987e-05		0.545203	3.55665e-05		0.545203	4.8038e-05		0.545203	6.2797e-05
0.548096	0.000355225		0.548096	0.000313428		0.548096	2.43994e-05		0.548096	3.5392e-05		0.548096	4.77611e-05		0.548096	6.23577e-05
0.55099	0.000334872		0.55099	0.000297038		0.55099	2.43004e-05		0.55099	3.52174e-05		0.55099	4.74846e-05		0.55099	6.19139e-05
0.553884	0.000315895		0.553884	0.000281613		0.553884	2.42019e-05		0.553884	3.50428e-05		0.553884	4.72085e-05		0.553884	6.14693e-05
0.556778	0.000298094		0.556778	0.000267051		0.556778	2.41038e-05		0.556778	3.48681e-05		0.556778	4.69325e-05		0.556778	6.10279e-05
0.559672	0.000281375		0.559672	0.000253251		0.559672	2.40061e-05		0.559672	3.46935e-05		0.559672	4.66567e-05		0.559672	6.05896e-05
0.562566	0.000265899		0.562566	0.000240223		0.562566	2.39088e-05		0.562566	3.45189e-05		0.562566	4.6381e-05		0.562566	6.01544e-05
0.56546	0.000251456		0.56546	0.000227916		0.56546	2.38118e-05		0.56546	3.43443e-05		0.56546	4.61053e-05		0.56546	5.97222e-05
0.568354	0.000237641		0.568354	0.000216302		0.568354	2.37152e-05		0.568354	3.41697e-05		0.568354	4.58296e-05		0.568354	5.92928e-05
0.571248	0.000224414		0.571248	0.000205456		0.571248	2.36189e-05		0.571248	3.3995e-05		0.571248	4.55538e-05		0.571248	5.88661e-05
0.574142	0.000211843		0.574142	0.000195203		0.574142	2.35229e-05		0.574142	3.38203e-05		0.574142	4.5278e-05		0.574142	5.84419e-05
0.577035	0.000200001		0.577035	0.000185428		0.577035	2.34271e-05		0.577035	3.36454e-05		0.577035	4.50019e-05		0.577035	5.802e-05
0.579929	0.000188917		0.579929	0.000176251		0.579929	2.33316e-05		0.579929	3.34701e-05		0.579929	4.47257e-05		0.579929	5.76004e-05
0.582823	0.000178642		0.582823	0.000167655		0.582823	2.32364e-05		0.582823	3.32943e-05		0.582823	4.44491e-05		0.582823	5.71828e-05
0.585717	0.000168977		0.585717	0.0001596		0.585717	2.31413e-05		0.585717	3.31189e-05		0.585717	4.41722e-05		0.585717	5.67672e-05
0.588611	0.000159662		0.588611	0.000152079		0.588611	2.30464e-05		0.588611	3.29448e-05		0.588611	4.38947e-05		0.588611	5.63533e-05
0.591505	0.000150835		0.591505	0.000145066		0.591505	2.29518e-05		0.591505	3.2772e-05		0.591505	4.36185e-05		0.591505	5.59412e-05
0.594399	0.000142628		0.594399	0.000138548		0.594399	2.28573e-05		0.594399	3.26006e-05		0.594399	4.33456e-05		0.594399	5.55306e-05
0.597293	0.000135023		0.597293	0.000132399		0.597293	2.27629e-05		0.597293	3.24305e-05		0.597293	4.30762e-05		0.597293	5.5124e-05
0.600186	0.000127991		0.600186	0.000126477		0.600186	2.26687e-05		0.600186	3.22619e-05		0.600186	4.28104e-05		0.600186	5.47243e-05
0.60308	0.00012154		0.60308	0.000120846		0.60308	2.25746e-05		0.60308	3.20947e-05		0.60308	4.25482e-05		0.60308	5.43317e-05
0.605974	0.000115614		0.605974	0.000115567		0.605974	2.24806e-05		0.605974	3.1929e-05		0.605974	4.229e-05		0.605974	5.39464e-05
0.608868	0.000109919		0.608868	0.000110699		0.608868	2.23868e-05		0.608868	3.17651e-05		0.608868	4.20357e-05		0.608868	5.35687e-05
0.611762	0.000104248		0.611762	0.000106314		0.611762	2.2293e-05		0.611762	3.16028e-05		0.611762	4.17856e-05		0.611762	5.31989e-05
0.614656	9.87188e-05		0.614656	0.000102425		0.614656	2.21993e-05		0.614656	3.14424e-05		0.614656	4.154e-05		0.614656	5.28374e-05
0.61755	9.34343e-05		0.61755	9.88175e-05		0.61755	2.21057e-05		0.61755	3.12839e-05		0.61755	4.1299e-05		0.61755	5.24847e-05
0.620444	8.84457e-05		0.620444	9.52745e-05		0.620444	2.20121e-05		0.620444	3.11274e-05		0.620444	4.10628e-05		0.620444	5.21414e-05
0.623338	8.37979e-05		0.623338	9.18081e-05		0.623338	2.19186e-05		0.623338	3.09731e-05		0.623338	4.08318e-05		0.623338	5.18082e-05
0.626231	7.94995e-05		0.626231	8.84425e-05		0.626231	2.18251e-05		0.626231	3.08209e-05		0.626231	4.06063e-05		0.626231	5.1486e-05
0.629125	7.5569e-05		0.629125	8.51723e-05		0.629125	2.17317e-05		0.629125	3.06711e-05		0.629125	4.03867e-05		0.629125	5.11757e-05
0.632019	7.20621e-05		0.632019	8.19885e-05		0.632019	2.16384e-05		0.632019	3.05237e-05		0.632019	4.01734e-05		0.632019	5.08787e-05
0.634913	6.90516e-05		0.634913	7.89047e-05		0.634913	2.15451e-05		0.634913	3.03789e-05		0.634913	3.99671e-05		0.634913	5.05966e-05
0.637807	6.63002e-05		0.637807	7.59577e-05		0.637807	2.14518e-05		0.637807	3.02369e-05		0.637807	3.97685e-05		0.637807	5.03314e-05
0.640701	6.36179e-05		0.640701	7.31978e-05		0.640701	2.13584e-05		0.640701	3.00979e-05		0.640701	3.95741e-05		0.640701	5.00746e-05
0.643595	6.11503e-05		0.643595	7.06829e-05		0.643595	2.12648e-05		0.643595	2.99627e-05		0.643595	3.93797e-05		0.643595	4.98159e-05
0.643595	6.11503e-05		0.643595	7.06829e-05		0.643595	2.12648e-05		0.643595	2.99627e-05		0.643595	3.93797e-05		0.643595	4.98159e-05
0.646489	5.88865e-05		0.646489	6.83802e-05		0.646489	2.11713e-05		0.646489	2.98295e-05		0.646489	3.91853e-05		0.646489	4.95561e-05
0.649383	5.67741e-05		0.649383	6.622e-05		0.649383	2.1078e-05		0.649383	2.96969e-05		0.649383	3.89907e-05		0.649383	4.92962e-05
0.652277	5.48324e-05		0.652277	6.41968e-05		0.652277	2.09851e-05		0.652277	2.95654e-05		0.652277	3.87961e-05		0.652277	4.90366e-05
0.65517	5.30524e-05		0.65517	6.23015e-05		0.65517	2.08926e-05		0.65517	2.94345e-05		0.65517	3.86014e-05		0.65517	4.87773e-05
0.658064	5.14061e-05		0.658064	6.05115e-05		0.658064	2.08004e-05		0.658064	2.93041e-05		0.658064	3.84066e-05		0.658064	4.85182e-05
0.660958	4.98644e-05		0.660958	5.88042e-05		0.660958	2.07088e-05		0.660958	2.91742e-05		0.660958	3.82117e-05		0.660958	4.82589e-05
0.663852	4.84154e-05		0.663852	5.71698e-05		0.663852	2.06176e-05		0.663852	2.90446e-05		0.663852	3.80167e-05		0.663852	4.79992e-05
0.666746	4.70512e-05		0.666746	5.56008e-05		0.666746	2.0527e-05		0.666746	2.89154e-05		0.666746	3.78215e-05		0.666746	4.77387e-05
0.66964	4.57565e-05		0.66964	5.40968e-05		0.66964	2.04369e-05		0.66964	2.87865e-05		0.66964	3.76262e-05		0.66964	4.74773e-05
0.672534	4.45166e-05		0.672534	5.26589e-05		0.672534	2.03473e-05		0.672534	2.8658e-05		0.672534	3.74305e-05		0.672534	4.72145e-05
0.675428	4.33278e-05		0.675428	5.12864e-05		0.675428	2.02583e-05		0.675428	2.85298e-05		0.675428	3.72345e-05		0.675428	4.69502e-05
0.678322	4.21858e-05		0.678322	4.99575e-05		0.678322	2.01699e-05		0.678322	2.84018e-05		0.678322	3.70381e-05		0.678322	4.6684e-05
0.681215	4.11056e-05		0.681215	4.86528e-05		0.681215	2.0082e-05		0.681215	2.8274e-05		0.681215	3.68411e-05		0.681215	4.64158e-05
0.684109	4.00771e-05		0.684109	4.73848e-05		0.684109	1.99948e-05		0.684109	2.81465e-05		0.684109	3.66434e-05		0.684109	4.61453e-05
0.687003	3.90707e-05		0.687003	4.61625e-05		0.687003	1.99082e-05		0.687003	2.8019e-05		0.687003	3.64448e-05		0.687003	4.58738e-05
0.689897	3.80851e-05		0.689897	4.49831e-05		0.689897	1.98222e-05		0.689897	2.78917e-05		0.689897	3.62454e-05		0.689897	4.56031e-05
0.692791	3.712e-05		0.692791	4.38448e-05		0.692791	1.97369e-05		0.692791	2.77643e-05		0.692791	3.60448e-05		0.692791	4.53331e-05
0.695685	3.61835e-05		0.695685	4.27472e-05		0.695685	1.96523e-05		0.695685	2.7637e-05		0.695685	3.58439e-05		0.695685	4.50637e-05
0.698579	3.52854e-05		0.698579	4.16926e-05		0.698579	1.95685e-05		0.698579	2.75096e-05		0.698579	3.56438e-05		0.698579	4.47949e-05
0.701473	3.44282e-05		0.701473	4.06845e-05		0.701473	1.94854e-05		0.701473	2.73822e-05		0.701473	3.54446e-05		0.701473	4.45266e-05
0.704367	3.36147e-05		0.704367	3.97263e-05		0.704367	1.94032e-05		0.704367	2.72546e-05		0.704367	3.52463e-05		0.704367	4.42588e-05
0.70726	3.28493e-05		0.70726	3.88236e-05		0.70726	1.93219e-05		0.70726	2.71268e-05		0.70726	3.50489e-05		0.70726	4.39916e-05
0.710154	3.21392e-05		0.710154	3.79852e-05		0.710154	1.92417e-05		0.710154	2.6999e-05		0.710154	3.48528e-05		0.710154	4.3725e-05
0.713048	3.14879e-05		0.713048	3.72249e-05		0.713048	1.91626e-05		0.713048	2.68711e-05		0.713048	3.46582e-05		0.713048	4.34594e-05
0.715942	3.09024e-05		0.715942	3.65664e-05		0.715942	1.90849e-05		0.715942	2.67434e-05		0.715942	3.44658e-05		0.715942	4.31953e-05
0.715942	3.09024e-05		0.715942	3.65664e-05		0.715942	1.90849e-05		0.715942	2.67434e-05		0.715942	3.44658e-05		0.715942	4.31953e-05
0.718836	3.03637e-05		0.718836	3.59812e-05		0.718836	1.90081e-05		0.718836	2.66156e-05		0.718836	3.42744e-05		0.718836	4.29305e-05
0.72173	2.98446e-05		0.72173	3.5424e-05		0.72173	1.89314e-05		0.72173	2.64874e-05		0.72173	3.40824e-05		0.72173	4.26624e-05
0.724624	2.9344e-05		0.724624	3.48923e-05		0.724624	1.88547e-05		0.724624	2.63587e-05		0.724624	3.38896e-05		0.724624	4.23899e-05
0.727518	2.88606e-05		0.727518	3.43838e-05		0.727518	1.87777e-05		0.727518	2.62293e-05		0.727518	3.36958e-05		0.727518	4.21122e-05
0.730412	2.83922e-05		0.730412	3.38954e-05		0.730412	1.87003e-05		0.730412	2.60992e-05		0.730412	3.35007e-05		0.730412	4.18277e-05
0.733305	2.7938e-05		0.733305	3.34242e-05		0.733305	1.86224e-05		0.733305	2.5968e-05		0.733305	3.33042e-05		0.733305	4.15383e-05
0.736199	2.74978e-05		0.736199	3.29682e-05		0.736199	1.85441e-05		0.736199	2.58357e-05		0.736199	3.3106e-05		0.736199	4.12463e-05
0.739093	2.70697e-05		0.739093	3.25252e-05		0.739093	1.8465e-05		0.739093	2.5702e-05		0.739093	3.29057e-05		0.739093	4.09512e-05
0.741987	2.66521e-05		0.741987	3.20933e-05		0.741987	1.83853e-05		0.741987	2.55666e-05		0.741987	3.27031e-05		0.741987	4.06521e-05
0.744881	2.62434e-05		0.744881	3.16704e-05		0.744881	1.83046e-05		0.744881	2.54294e-05		0.744881	3.24979e-05		0.744881	4.03483e-05
0.747775	2.58423e-05		0.747775	3.12549e-05		0.747775	1.82229e-05		0.747775	2.52899e-05		0.747775	3.22897e-05		0.747775	4.00388e-05
0.750669	2.54477e-05		0.750669	3.08449e-05		0.750669	1.81399e-05		0.750669	2.51478e-05		0.750669	3.20775e-05		0.750669	3.97227e-05
0.753563	2.50565e-05		0.753563	3.04389e-05		0.753563	1.80555e-05		0.753563	2.50029e-05		0.753563	3.18604e-05		0.753563	3.93991e-05
0.756457	2.46654e-05		0.756457	3.00361e-05		0.756457	1.79693e-05		0.756457	2.48546e-05		0.756457	3.16376e-05		0.756457	3.90671e-05
0.75935	2.42751e-05		0.75935	2.96363e-05		0.75935	1.78811e-05		0.75935	2.47026e-05		0.75935	3.14087e-05		0.75935	3.87256e-05
0.762244	2.3887e-05		0.762244	2.92383e-05		0.762244	1.77906e-05		0.762244	2.45464e-05		0.762244	3.11731e-05		0.762244	3.83738e-05
0.765138	2.35005e-05		0.765138	2.88413e-05		0.765138	1.76974e-05		0.765138	2.43857e-05		0.765138	3.09301e-05		0.765138	3.80106e-05
0.768032	2.3115e-05		0.768032	2.8444e-05		0.768032	1.76012e-05		0.768032	2.42199e-05		0.768032	3.06792e-05		0.768032	3.76352e-05
0.770926	2.27302e-05		0.770926	2.80453e-05		0.770926	1.75017e-05		0.770926	2.40487e-05		0.770926	3.04198e-05		0.770926	3.72472e-05
0.77382	2.23462e-05		0.77382	2.76443e-05		0.77382	1.73985e-05		0.77382	2.38718e-05		0.77382	3.01515e-05		0.77382	3.68459e-05
0.776714	2.19633e-05		0.776714	2.72401e-05		0.776714	1.72914e-05		0.776714	2.36891e-05		0.776714	2.98739e-05		0.776714	3.64325e-05
0.779608	2.15824e-05		0.779608	2.68331e-05		0.779608	1.71802e-05		0.779608	2.35005e-05		0.779608	2.95867e-05		0.779608	3.60085e-05
0.782502	2.12049e-05		0.782502	2.64246e-05		0.782502	1.70648e-05		0.782502	2.3306e-05		0.782502	2.929e-05		0.782502	3.55744e-05
0.785396	2.08337e-05		0.785396	2.60161e-05		0.785396	1.69451e-05		0.785396	2.31058e-05		0.785396	2.89837e-05		0.785396	3.51316e-05
0.788289	2.0472e-05		0.788289	2.56083e-05		0.788289	1.6821e-05		0.788289	2.28999e-05		0.788289	2.86682e-05		0.788289	3.46815e-05
0.791183	2.01223e-05		0.791183	2.52027e-05		0.791183	1.66927e-05		0.791183	2.26887e-05		0.791183	2.83438e-05		0.791183	3.42264e-05
0.794077	1.97869e-05		0.794077	2.48006e-05		0.794077	1.65603e-05		0.794077	2.24725e-05		0.794077	2.8011e-05		0.794077	3.37686e-05
0.796971	1.9468e-05		0.796971	2.44036e-05		0.796971	1.6424e-05		0.796971	2.22511e-05		0.796971	2.76703e-05		0.796971	3.33102e-05
0.799865	1.91665e-05		0.799865	2.40128e-05		0.799865	1.62839e-05		0.799865	2.20241e-05		0.799865	2.7322e-05		0.799865	3.28529e-05
0.799865	1.91665e-05		0.799865	2.40128e-05		0.799865	1.62839e-05		0.799865	2.20241e-05		0.799865	2.7322e-05		0.799865	3.28529e-05
0.802759	1.88728e-05		0.802759	2.36255e-05		0.802759	1.61386e-05		0.802759	2.17904e-05		0.802759	2.69641e-05		0.802759	3.23903e-05
0.805653	1.85778e-05		0.805653	2.32387e-05		0.805653	1.59864e-05		0.805653	2.15485e-05		0.805653	2.65944e-05		0.805653	3.19152e-05
0.808547	1.82826e-05		0.808547	2.28533e-05		0.808547	1.58272e-05		0.808547	2.12984e-05		0.808547	2.6213e-05		0.808547	3.14285e-05
0.811441	1.79879e-05		0.811441	2.24694e-05		0.811441	1.56604e-05		0.811441	2.10401e-05		0.811441	2.58199e-05		0.811441	3.0931e-05
0.814334	1.76936e-05		0.814334	2.20868e-05		0.814334	1.54856e-05		0.814334	2.07733e-05		0.814334	2.54149e-05		0.814334	3.04229e-05
0.817228	1.73993e-05		0.817228	2.17053e-05		0.817228	1.53022e-05		0.817228	2.04973e-05		0.817228	2.49985e-05		0.817228	2.99046e-05
0.820122	1.7104e-05		0.820122	2.13241e-05		0.820122	1.51097e-05		0.820122	2.02118e-05		0.820122	2.45717e-05		0.820122	2.93759e-05
0.823016	1.68065e-05		0.823016	2.09431e-05		0.823016	1.49073e-05		0.823016	1.99164e-05		0.823016	2.41354e-05		0.823016	2.8838e-05
0.82591	1.65049e-05		0.82591	2.0562e-05		0.82591	1.46941e-05		0.82591	1.9611e-05		0.82591	2.36893e-05		0.82591	2.82921e-05
0.828804	1.6197e-05		0.828804	2.01802e-05		0.828804	1.44692e-05		0.828804	1.92954e-05		0.828804	2.32336e-05		0.828804	2.77384e-05
0.831698	1.58822e-05		0.831698	1.97972e-05		0.831698	1.42356e-05		0.831698	1.89697e-05		0.831698	2.27679e-05		0.831698	2.71768e-05
0.834592	1.55615e-05		0.834592	1.94122e-05		0.834592	1.39977e-05		0.834592	1.86339e-05		0.834592	2.22923e-05		0.834592	2.66075e-05
0.837486	1.52394e-05		0.837486	1.90244e-05		0.837486	1.37565e-05		0.837486	1.82883e-05		0.837486	2.18087e-05		0.837486	2.60308e-05
0.840379	1.492e-05		0.840379	1.86355e-05		0.840379	1.35131e-05		0.840379	1.79338e-05		0.840379	2.13202e-05		0.840379	2.54501e-05
0.843273	1.46026e-05		0.843273	1.82479e-05		0.843273	1.32685e-05		0.843273	1.75715e-05		0.843273	2.08277e-05		0.843273	2.48689e-05
0.846167	1.42861e-05		0.846167	1.78623e-05		0.846167	1.30238e-05		0.846167	1.72023e-05		0.846167	2.0332e-05		0.846167	2.42881e-05
0.849061	1.39697e-05		0.849061	1.74795e-05		0.849061	1.27805e-05		0.849061	1.68274e-05		0.849061	1.9834e-05		0.849061	2.37086e-05
0.851955	1.36528e-05		0.851955	1.71003e-05		0.851955	1.25404e-05		0.851955	1.64483e-05		0.851955	1.93344e-05		0.851955	2.31308e-05
0.854849	1.33394e-05		0.854849	1.6726e-05		0.854849	1.23033e-05		0.854849	1.60665e-05		0.854849	1.88388e-05		0.854849	2.25607e-05
0.857743	1.30349e-05		0.857743	1.63583e-05		0.857743	1.2069e-05		0.857743	1.56857e-05		0.857743	1.83545e-05		0.857743	2.20063e-05
0.860637	1.27411e-05		0.860637	1.60032e-05		0.860637	1.18395e-05		0.860637	1.53111e-05		0.860637	1.78846e-05		0.860637	2.14709e-05
0.863531	1.24608e-05		0.863531	1.56681e-05		0.863531	1.16177e-05		0.863531	1.49474e-05		0.863531	1.74333e-05		0.863531	2.09584e-05
0.866424	1.21983e-05		0.866424	1.53585e-05		0.866424	1.14079e-05		0.866424	1.46011e-05		0.866424	1.70062e-05		0.866424	2.04747e-05
0.869318	1.19605e-05		0.869318	1.50825e-05		0.869318	1.12161e-05		0.869318	1.42817e-05		0.869318	1.66118e-05		0.869318	2.00316e-05
0.872212	1.17583e-05		0.872212	1.48514e-05		0.872212	1.10517e-05		0.872212	1.40046e-05		0.872212	1.62721e-05		0.872212	1.96541e-05
0.875106	1.16093e-05		0.875106	1.46811e-05		0.875106	1.09288e-05		0.875106	1.37955e-05		0.875106	1.60214e-05		0.875106	1.93774e-05
0.878	1.15516e-05		0.878	1.46142e-05		0.878	1.08797e-05		0.878	1.37117e-05		0.878	1.59227e-05		0.878	1.92691e-05

## Sheet: oh distribution 
SN 0			SN 0.2			SN 0.4			SN 0.6			SN 0.8			SN 1
Axial distance	oh mass fraction		Axial distance	oh mass fraction		Axial distance	oh mass fraction		Axial distance	oh mass fraction		Axial distance	oh mass fraction		Axial distance	oh mass fraction
0.00115113	0.000103374		0.00115113	0.000109759		0.00115113	0.000169045		0.00115113	9.26834e-05		0.00115113	9.17044e-05		0.00115113	9.73336e-05
0.00404502	0.000227447		0.00404502	0.000241007		0.00404502	0.000337906		0.00404502	0.000273584		0.00404502	0.000262951		0.00404502	0.000244999
0.00693891	0.000350109		0.00693891	0.000361858		0.00693891	0.000417842		0.00693891	0.000397903		0.00693891	0.000396275		0.00693891	0.000382145
0.0098328	0.000310296		0.0098328	0.000312635		0.0098328	0.00032086		0.0098328	0.000305726		0.0098328	0.000314666		0.0098328	0.000319395
0.0127267	0.000207531		0.0127267	0.000208845		0.0127267	0.0002152		0.0127267	0.000176846		0.0127267	0.000168124		0.0127267	0.000152036
0.0156206	0.000142341		0.0156206	0.000140935		0.0156206	0.000145318		0.0156206	9.15629e-05		0.0156206	6.39012e-05		0.0156206	4.1276e-05
0.0185145	0.000104066		0.0185145	0.00010132		0.0185145	9.90246e-05		0.0185145	4.4207e-05		0.0185145	1.07199e-05		0.0185145	1.37152e-17
0.0214084	8.34152e-05		0.0214084	7.95751e-05		0.0214084	6.97407e-05		0.0214084	1.9764e-05		0.0214084	0		0.0214084	0
0.0243023	7.44241e-05		0.0243023	7.05142e-05		0.0243023	5.13514e-05		0.0243023	9.19197e-06		0.0243023	1.94138e-06		0.0243023	3.1244e-06
0.0271961	7.43142e-05		0.0271961	6.93668e-05		0.0271961	3.96017e-05		0.0271961	7.36095e-06		0.0271961	3.48668e-06		0.0271961	5.18521e-06
0.03009	7.81534e-05		0.03009	6.93033e-05		0.03009	3.17307e-05		0.03009	6.84637e-06		0.03009	2.08384e-06		0.03009	2.99171e-06
0.0329839	8.16381e-05		0.0329839	7.06523e-05		0.0329839	2.58112e-05		0.0329839	5.14135e-06		0.0329839	5.3853e-07		0.0329839	1.26116e-06
0.0358778	8.46412e-05		0.0358778	7.46776e-05		0.0358778	2.01018e-05		0.0358778	3.01479e-06		0.0358778	2.77251e-17		0.0358778	4.37765e-07
0.0387717	8.42854e-05		0.0387717	7.76843e-05		0.0387717	1.52343e-05		0.0387717	1.01902e-06		0.0387717	2.85721e-17		0.0387717	1.07497e-07
0.0416656	7.83336e-05		0.0416656	7.69635e-05		0.0416656	1.34321e-05		0.0416656	8.73612e-07		0.0416656	1.89193e-17		0.0416656	8.65126e-17
0.0445595	6.94351e-05		0.0445595	6.97065e-05		0.0445595	1.50251e-05		0.0445595	5.52628e-06		0.0445595	5.50931e-06		0.0445595	7.98065e-08
0.0474534	6.03705e-05		0.0474534	5.68529e-05		0.0474534	1.78757e-05		0.0474534	3.34039e-05		0.0474534	3.3004e-05		0.0474534	1.93232e-06
0.0503473	5.06078e-05		0.0503473	4.23916e-05		0.0503473	1.92469e-05		0.0503473	3.52239e-05		0.0503473	3.63908e-05		0.0503473	9.57446e-06
0.0532412	4.00223e-05		0.0532412	2.93187e-05		0.0532412	1.89928e-05		0.0532412	9.23125e-06		0.0532412	1.1097e-05		0.0532412	2.036e-05
0.056135	3.17807e-05		0.056135	2.09114e-05		0.056135	1.97992e-05		0.056135	4.41972e-06		0.056135	2.24318e-06		0.056135	1.88129e-05
0.0590289	2.81827e-05		0.0590289	1.80017e-05		0.0590289	2.17e-05		0.0590289	2.1895e-05		0.0590289	3.72735e-06		0.0590289	9.8699e-06
0.0619228	2.75967e-05		0.0619228	1.97148e-05		0.0619228	2.17822e-05		0.0619228	7.41101e-05		0.0619228	2.80011e-05		0.0619228	5.55717e-06
0.0648167	2.95094e-05		0.0648167	2.4044e-05		0.0648167	2.76762e-05		0.0648167	0.000128069		0.0648167	8.86953e-05		0.0648167	4.84383e-06
0.0677106	2.71735e-05		0.0677106	2.93505e-05		0.0677106	4.79734e-05		0.0677106	0.000183928		0.0677106	0.00015121		0.0677106	1.97275e-05
0.0706045	1.35648e-05		0.0706045	2.64019e-05		0.0706045	4.90818e-05		0.0706045	0.000248452		0.0706045	0.000200369		0.0706045	5.90409e-05
0.0734984	4.07779e-06		0.0734984	1.69701e-05		0.0734984	2.83778e-05		0.0734984	0.000245433		0.0734984	0.00019551		0.0734984	9.63178e-05
0.0763923	1.14211e-05		0.0763923	1.84885e-05		0.0763923	1.64915e-05		0.0763923	0.000185244		0.0763923	0.000137433		0.0763923	0.000124002
0.0792862	2.66254e-05		0.0792862	3.38103e-05		0.0792862	1.36544e-05		0.0792862	0.000136944		0.0792862	9.40843e-05		0.0792862	0.000147632
0.0821801	4.47861e-05		0.0821801	5.58483e-05		0.0821801	2.40755e-05		0.0821801	0.000103352		0.0821801	6.65494e-05		0.0821801	0.000133973
0.085074	6.33586e-05		0.085074	7.75189e-05		0.085074	5.03314e-05		0.085074	7.95329e-05		0.085074	4.86118e-05		0.085074	9.55665e-05
0.085074	6.33586e-05		0.085074	7.75189e-05		0.085074	5.03314e-05		0.085074	7.95329e-05		0.085074	4.86118e-05		0.085074	9.55665e-05
0.0879678	7.70098e-05		0.0879678	9.28815e-05		0.0879678	8.85803e-05		0.0879678	6.20206e-05		0.0879678	3.62627e-05		0.0879678	6.70261e-05
0.0908617	8.63812e-05		0.0908617	0.000101354		0.0908617	0.00013932		0.0908617	4.8803e-05		0.0908617	2.74403e-05		0.0908617	4.79052e-05
0.0937556	9.23453e-05		0.0937556	0.000105789		0.0937556	0.000187366		0.0937556	3.86427e-05		0.0937556	2.09667e-05		0.0937556	3.4996e-05
0.0966495	9.60229e-05		0.0966495	0.000107797		0.0966495	0.000239066		0.0966495	3.0723e-05		0.0966495	1.61321e-05		0.0966495	2.60435e-05
0.0995434	9.83628e-05		0.0995434	0.000107818		0.0995434	0.000299467		0.0995434	2.45032e-05		0.0995434	1.24856e-05		0.0995434	1.96655e-05
0.102437	9.95323e-05		0.102437	0.000106317		0.102437	0.000319681		0.102437	1.95974e-05		0.102437	9.71722e-06		0.102437	1.50298e-05
0.105331	0.000100224		0.105331	0.000104075		0.105331	0.00028335		0.105331	1.57017e-05		0.105331	7.6044e-06		0.105331	1.16197e-05
0.108225	0.000100344		0.108225	0.000100933		0.108225	0.000226259		0.108225	1.26062e-05		0.108225	5.99654e-06		0.108225	9.07771e-06
0.111119	0.000100262		0.111119	9.71396e-05		0.111119	0.000175782		0.111119	1.0159e-05		0.111119	4.76581e-06		0.111119	7.17769e-06
0.114013	9.99506e-05		0.114013	9.37091e-05		0.114013	0.000136034		0.114013	8.23118e-06		0.114013	3.80941e-06		0.114013	5.76572e-06
0.116907	9.9008e-05		0.116907	9.01052e-05		0.116907	0.000105741		0.116907	6.69894e-06		0.116907	3.07153e-06		0.116907	4.72671e-06
0.119801	9.82475e-05		0.119801	8.64819e-05		0.119801	8.2784e-05		0.119801	5.48127e-06		0.119801	2.50624e-06		0.119801	3.96087e-06
0.122695	9.78853e-05		0.122695	8.30347e-05		0.122695	6.52785e-05		0.122695	4.52338e-06		0.122695	2.07661e-06		0.122695	3.38887e-06
0.125588	9.6884e-05		0.125588	7.91625e-05		0.125588	5.17845e-05		0.125588	3.78157e-06		0.125588	1.753e-06		0.125588	2.96437e-06
0.128482	9.54496e-05		0.128482	7.46007e-05		0.128482	4.12694e-05		0.128482	3.2063e-06		0.128482	1.51155e-06		0.128482	2.6512e-06
0.131376	9.42499e-05		0.131376	7.04816e-05		0.131376	3.30215e-05		0.131376	2.75405e-06		0.131376	1.33314e-06		0.131376	2.42152e-06
0.13427	9.27085e-05		0.13427	6.73564e-05		0.13427	2.64956e-05		0.13427	2.40195e-06		0.13427	1.20268e-06		0.13427	2.254e-06
0.137164	9.10292e-05		0.137164	6.22067e-05		0.137164	2.12997e-05		0.137164	2.13041e-06		0.137164	1.10834e-06		0.137164	2.13245e-06
0.140058	8.95793e-05		0.140058	6.25424e-05		0.140058	1.71407e-05		0.140058	1.92296e-06		0.140058	1.04109e-06		0.140058	2.04474e-06
0.142952	8.8121e-05		0.142952	6.86282e-05		0.142952	1.37726e-05		0.142952	1.76594e-06		0.142952	9.93998e-07		0.142952	1.98187e-06
0.145846	8.47611e-05		0.145846	6.64521e-05		0.145846	1.10677e-05		0.145846	1.64826e-06		0.145846	9.61782e-07		0.145846	1.93723e-06
0.14874	8.24907e-05		0.14874	5.79951e-05		0.14874	8.89204e-06		0.14874	1.5611e-06		0.14874	9.405e-07		0.14874	1.90588e-06
0.151633	8.50494e-05		0.151633	5.15613e-05		0.151633	7.12082e-06		0.151633	1.49759e-06		0.151633	9.27232e-07		0.151633	1.88416e-06
0.154527	8.46641e-05		0.154527	4.80696e-05		0.154527	5.68265e-06		0.154527	1.45244e-06		0.154527	9.19854e-07		0.154527	1.86929e-06
0.157421	8.02098e-05		0.157421	4.59324e-05		0.157421	4.52256e-06		0.157421	1.4217e-06		0.157421	9.16834e-07		0.157421	1.85937e-06
0.160315	7.73295e-05		0.160315	4.65835e-05		0.160315	3.59316e-06		0.160315	1.40239e-06		0.160315	9.16766e-07		0.160315	1.85344e-06
0.163209	7.55332e-05		0.163209	4.92976e-05		0.163209	2.85824e-06		0.163209	1.39195e-06		0.163209	9.18492e-07		0.163209	1.85083e-06
0.166103	7.42359e-05		0.166103	4.92827e-05		0.166103	2.28745e-06		0.166103	1.38793e-06		0.166103	9.21278e-07		0.166103	1.8502e-06
0.166103	7.42359e-05		0.166103	4.92827e-05		0.166103	2.28745e-06		0.166103	1.38793e-06		0.166103	9.21278e-07		0.166103	1.8502e-06
0.168997	7.29019e-05		0.168997	4.768e-05		0.168997	1.84306e-06		0.168997	1.38706e-06		0.168997	9.24105e-07		0.168997	1.84853e-06
0.171891	7.19487e-05		0.171891	4.71599e-05		0.171891	1.49186e-06		0.171891	1.38754e-06		0.171891	9.26571e-07		0.171891	1.84415e-06
0.174785	7.14951e-05		0.174785	4.76097e-05		0.174785	1.21713e-06		0.174785	1.38957e-06		0.174785	9.28873e-07		0.174785	1.83852e-06
0.177678	7.08486e-05		0.177678	4.87346e-05		0.177678	1.00431e-06		0.177678	1.3925e-06		0.177678	9.30446e-07		0.177678	1.83285e-06
0.180572	7.03287e-05		0.180572	4.99983e-05		0.180572	8.41006e-07		0.180572	1.3947e-06		0.180572	9.30893e-07		0.180572	1.82465e-06
0.183466	6.91576e-05		0.183466	5.22105e-05		0.183466	7.16759e-07		0.183466	1.39507e-06		0.183466	9.30319e-07		0.183466	1.81244e-06
0.18636	6.8833e-05		0.18636	5.49766e-05		0.18636	6.22992e-07		0.18636	1.3944e-06		0.18636	9.29201e-07		0.18636	1.79913e-06
0.189254	6.97485e-05		0.189254	5.70606e-05		0.189254	5.52797e-07		0.189254	1.39529e-06		0.189254	9.2861e-07		0.189254	1.78625e-06
0.192148	6.99606e-05		0.192148	5.86138e-05		0.192148	5.00676e-07		0.192148	1.39997e-06		0.192148	9.28917e-07		0.192148	1.77303e-06
0.195042	6.98935e-05		0.195042	5.95678e-05		0.195042	4.62378e-07		0.195042	1.40653e-06		0.195042	9.2783e-07		0.195042	1.75877e-06
0.197936	6.99951e-05		0.197936	6.01657e-05		0.197936	4.34602e-07		0.197936	1.41143e-06		0.197936	9.23721e-07		0.197936	1.74342e-06
0.20083	6.99765e-05		0.20083	6.02671e-05		0.20083	4.14828e-07		0.20083	1.41394e-06		0.20083	9.18857e-07		0.20083	1.7272e-06
0.203723	6.98987e-05		0.203723	5.99512e-05		0.203723	4.0114e-07		0.203723	1.41457e-06		0.203723	9.15092e-07		0.203723	1.7102e-06
0.206617	6.98716e-05		0.206617	5.98039e-05		0.206617	3.92093e-07		0.206617	1.41344e-06		0.206617	9.12037e-07		0.206617	1.69247e-06
0.209511	6.96623e-05		0.209511	5.9987e-05		0.209511	3.86586e-07		0.209511	1.41303e-06		0.209511	9.08996e-07		0.209511	1.67399e-06
0.212405	6.93818e-05		0.212405	6.02097e-05		0.212405	3.83594e-07		0.212405	1.41878e-06		0.212405	9.0551e-07		0.212405	1.65465e-06
0.215299	6.84372e-05		0.215299	5.99061e-05		0.215299	3.8219e-07		0.215299	1.42946e-06		0.215299	9.01384e-07		0.215299	1.63425e-06
0.215299	6.84372e-05		0.215299	5.99061e-05		0.215299	3.8219e-07		0.215299	1.42946e-06		0.215299	9.01384e-07		0.215299	1.63425e-06
0.218193	6.69748e-05		0.218193	5.99565e-05		0.218193	3.8183e-07		0.218193	1.44237e-06		0.218193	8.96864e-07		0.218193	1.61361e-06
0.221087	6.59736e-05		0.221087	6.12147e-05		0.221087	3.82113e-07		0.221087	1.45238e-06		0.221087	8.92206e-07		0.221087	1.59364e-06
0.223981	6.54151e-05		0.223981	6.31044e-05		0.223981	3.82504e-07		0.223981	1.44895e-06		0.223981	8.87399e-07		0.223981	1.57433e-06
0.226875	6.49922e-05		0.226875	6.5126e-05		0.226875	3.82655e-07		0.226875	1.4373e-06		0.226875	8.82421e-07		0.226875	1.55553e-06
0.229768	6.44788e-05		0.229768	6.64645e-05		0.229768	3.82737e-07		0.229768	1.42986e-06		0.229768	8.77185e-07		0.229768	1.5371e-06
0.232662	6.35877e-05		0.232662	6.73232e-05		0.232662	3.834e-07		0.232662	1.42915e-06		0.232662	8.71593e-07		0.232662	1.51979e-06
0.235556	6.23906e-05		0.235556	6.82795e-05		0.235556	3.85097e-07		0.235556	1.43267e-06		0.235556	8.65581e-07		0.235556	1.50426e-06
0.23845	6.23861e-05		0.23845	6.87157e-05		0.23845	3.8705e-07		0.23845	1.43758e-06		0.23845	8.59297e-07		0.23845	1.49024e-06
0.241344	6.3531e-05		0.241344	6.96675e-05		0.241344	3.88315e-07		0.241344	1.44203e-06		0.241344	8.53375e-07		0.241344	1.47763e-06
0.244238	6.46524e-05		0.244238	7.19027e-05		0.244238	3.88879e-07		0.244238	1.44535e-06		0.244238	8.48143e-07		0.244238	1.46639e-06
0.247132	6.55267e-05		0.247132	7.48368e-05		0.247132	3.88884e-07		0.247132	1.4478e-06		0.247132	8.43378e-07		0.247132	1.45646e-06
0.250026	6.62621e-05		0.250026	7.71406e-05		0.250026	3.8848e-07		0.250026	1.44978e-06		0.250026	8.38938e-07		0.250026	1.44783e-06
0.25292	6.64561e-05		0.25292	8.07082e-05		0.25292	3.88437e-07		0.25292	1.45144e-06		0.25292	8.34742e-07		0.25292	1.44047e-06
0.255814	6.60762e-05		0.255814	8.59674e-05		0.255814	3.89894e-07		0.255814	1.45272e-06		0.255814	8.30744e-07		0.255814	1.43438e-06
0.258707	6.58325e-05		0.258707	8.96806e-05		0.258707	3.93048e-07		0.258707	1.4533e-06		0.258707	8.26913e-07		0.258707	1.42959e-06
0.261601	6.58046e-05		0.261601	9.30161e-05		0.261601	3.96183e-07		0.261601	1.45259e-06		0.261601	8.23228e-07		0.261601	1.42619e-06
0.264495	6.61845e-05		0.264495	9.73743e-05		0.264495	3.96248e-07		0.264495	1.45092e-06		0.264495	8.19686e-07		0.264495	1.42422e-06
0.267389	6.66438e-05		0.267389	0.000100854		0.267389	3.93556e-07		0.267389	1.4496e-06		0.267389	8.16297e-07		0.267389	1.42369e-06
0.270283	6.77753e-05		0.270283	0.000103549		0.270283	3.91282e-07		0.270283	1.45029e-06		0.270283	8.13074e-07		0.270283	1.42464e-06
0.273177	6.99214e-05		0.273177	0.000106144		0.273177	3.90648e-07		0.273177	1.45405e-06		0.273177	8.10022e-07		0.273177	1.42715e-06
0.276071	7.11201e-05		0.276071	0.000107027		0.276071	3.91328e-07		0.276071	1.46037e-06		0.276071	8.0714e-07		0.276071	1.43134e-06
0.278965	7.20669e-05		0.278965	0.000107329		0.278965	3.92677e-07		0.278965	1.46805e-06		0.278965	8.04426e-07		0.278965	1.4373e-06
0.281859	7.40325e-05		0.281859	0.000108195		0.281859	3.94193e-07		0.281859	1.47596e-06		0.281859	8.01875e-07		0.281859	1.44354e-06
0.284752	7.73088e-05		0.284752	0.000110317		0.284752	3.9559e-07		0.284752	1.48348e-06		0.284752	7.99492e-07		0.284752	1.44863e-06
0.287646	8.10602e-05		0.287646	0.000112883		0.287646	3.96761e-07		0.287646	1.49135e-06		0.287646	7.97297e-07		0.287646	1.45269e-06
0.29054	8.44261e-05		0.29054	0.000116212		0.29054	3.97768e-07		0.29054	1.50038e-06		0.29054	7.95343e-07		0.29054	1.45576e-06
0.293434	8.84119e-05		0.293434	0.00011965		0.293434	3.98686e-07		0.293434	1.51039e-06		0.293434	7.93662e-07		0.293434	1.45784e-06
0.296328	9.20328e-05		0.296328	0.000123025		0.296328	3.9953e-07		0.296328	1.52111e-06		0.296328	7.92245e-07		0.296328	1.45889e-06
0.299222	9.44781e-05		0.299222	0.00012789		0.299222	4.00294e-07		0.299222	1.53246e-06		0.299222	7.91061e-07		0.299222	1.45889e-06
0.302116	9.67044e-05		0.302116	0.000132745		0.302116	4.00954e-07		0.302116	1.54397e-06		0.302116	7.89685e-07		0.302116	1.45778e-06
0.30501	9.9166e-05		0.30501	0.000136877		0.30501	4.01472e-07		0.30501	1.55449e-06		0.30501	7.87716e-07		0.30501	1.45554e-06
0.307904	0.000101989		0.307904	0.000140281		0.307904	4.01796e-07		0.307904	1.56327e-06		0.307904	7.85153e-07		0.307904	1.45213e-06
0.310797	0.000103201		0.310797	0.000143151		0.310797	4.01861e-07		0.310797	1.57142e-06		0.310797	7.81979e-07		0.310797	1.44751e-06
0.313691	0.00010251		0.313691	0.000146106		0.313691	4.0154e-07		0.313691	1.58206e-06		0.313691	7.78179e-07		0.313691	1.44162e-06
0.313691	0.00010251		0.313691	0.000146106		0.313691	4.0154e-07		0.313691	1.58206e-06		0.313691	7.78179e-07		0.313691	1.44162e-06
0.316585	0.000103109		0.316585	0.000150578		0.316585	4.00666e-07		0.316585	1.59572e-06		0.316585	7.74267e-07		0.316585	1.43476e-06
0.319479	0.000105364		0.319479	0.000157205		0.319479	3.99956e-07		0.319479	1.60906e-06		0.319479	7.70737e-07		0.319479	1.4272e-06
0.322373	0.000108123		0.322373	0.000165239		0.322373	4.00075e-07		0.322373	1.61998e-06		0.322373	7.67508e-07		0.322373	1.41884e-06
0.325267	0.000112396		0.325267	0.000171181		0.325267	4.00792e-07		0.325267	1.62896e-06		0.325267	7.64502e-07		0.325267	1.41019e-06
0.328161	0.000115621		0.328161	0.000173839		0.328161	4.01956e-07		0.328161	1.63709e-06		0.328161	7.61652e-07		0.328161	1.40176e-06
0.331055	0.00011731		0.331055	0.000178824		0.331055	4.03478e-07		0.331055	1.64493e-06		0.331055	7.58905e-07		0.331055	1.39351e-06
0.333949	0.000119042		0.333949	0.000190299		0.333949	4.05303e-07		0.333949	1.65228e-06		0.333949	7.56213e-07		0.333949	1.38539e-06
0.336842	0.000118421		0.336842	0.000205059		0.336842	4.07394e-07		0.336842	1.65849e-06		0.336842	7.53529e-07		0.336842	1.37739e-06
0.339736	0.000117176		0.339736	0.000219202		0.339736	4.09723e-07		0.339736	1.66487e-06		0.339736	7.50807e-07		0.339736	1.36947e-06
0.34263	0.000117107		0.34263	0.000231803		0.34263	4.12268e-07		0.34263	1.67303e-06		0.34263	7.48001e-07		0.34263	1.36163e-06
0.345524	0.000119207		0.345524	0.000238602		0.345524	4.15009e-07		0.345524	1.68295e-06		0.345524	7.45048e-07		0.345524	1.35382e-06
0.348418	0.000125015		0.348418	0.000244042		0.348418	4.17927e-07		0.348418	1.69426e-06		0.348418	7.41859e-07		0.348418	1.34602e-06
0.351312	0.000135198		0.351312	0.000256404		0.351312	4.21015e-07		0.351312	1.70646e-06		0.351312	7.38322e-07		0.351312	1.33818e-06
0.354206	0.000142816		0.354206	0.000271612		0.354206	4.24273e-07		0.354206	1.71948e-06		0.354206	7.34826e-07		0.354206	1.33026e-06
0.3571	0.000145624		0.3571	0.000291528		0.3571	4.27697e-07		0.3571	1.73343e-06		0.3571	7.3185e-07		0.3571	1.32221e-06
0.359994	0.000147951		0.359994	0.000319438		0.359994	4.31277e-07		0.359994	1.74837e-06		0.359994	7.29433e-07		0.359994	1.31396e-06
0.362887	0.000157085		0.362887	0.000350615		0.362887	4.34998e-07		0.362887	1.76432e-06		0.362887	7.27591e-07		0.362887	1.30546e-06
0.365781	0.000166266		0.365781	0.0003874		0.365781	4.38844e-07		0.365781	1.78121e-06		0.365781	7.26323e-07		0.365781	1.29728e-06
0.368675	0.000171788		0.368675	0.000424817		0.368675	4.42794e-07		0.368675	1.79894e-06		0.368675	7.25621e-07		0.368675	1.28996e-06
0.371569	0.000193377		0.371569	0.000453586		0.371569	4.4682e-07		0.371569	1.81736e-06		0.371569	7.25478e-07		0.371569	1.28346e-06
0.374463	0.000226302		0.374463	0.000481479		0.374463	4.5089e-07		0.374463	1.83632e-06		0.374463	7.25882e-07		0.374463	1.27777e-06
0.377357	0.000259069		0.377357	0.000515673		0.377357	4.54981e-07		0.377357	1.85568e-06		0.377357	7.26822e-07		0.377357	1.27287e-06
0.380251	0.000292301		0.380251	0.000549653		0.380251	4.59088e-07		0.380251	1.8753e-06		0.380251	7.28282e-07		0.380251	1.26874e-06
0.383145	0.000321547		0.383145	0.000582893		0.383145	4.63205e-07		0.383145	1.89503e-06		0.383145	7.30245e-07		0.383145	1.26535e-06
0.386039	0.000345073		0.386039	0.000627321		0.386039	4.6729e-07		0.386039	1.91465e-06		0.386039	7.32691e-07		0.386039	1.26268e-06
0.388932	0.000372595		0.388932	0.000678093		0.388932	4.71266e-07		0.388932	1.93385e-06		0.388932	7.35591e-07		0.388932	1.26067e-06
0.391826	0.000405834		0.391826	0.000731832		0.391826	4.75041e-07		0.391826	1.95227e-06		0.391826	7.38904e-07		0.391826	1.25929e-06
0.39472	0.00043559		0.39472	0.000794702		0.39472	4.78513e-07		0.39472	1.96956e-06		0.39472	7.42576e-07		0.39472	1.25844e-06
0.397614	0.000461192		0.397614	0.000860596		0.397614	4.81561e-07		0.397614	1.98527e-06		0.397614	7.46546e-07		0.397614	1.258e-06
0.400508	0.000486434		0.400508	0.000923293		0.400508	4.8403e-07		0.400508	1.9988e-06		0.400508	7.50746e-07		0.400508	1.25788e-06
0.403402	0.00051343		0.403402	0.000977355		0.403402	4.85804e-07		0.403402	2.00962e-06		0.403402	7.54809e-07		0.403402	1.25806e-06
0.403402	0.00051343		0.403402	0.000977355		0.403402	4.85804e-07		0.403402	2.00962e-06		0.403402	7.54809e-07		0.403402	1.25806e-06
0.406296	0.000542908		0.406296	0.00101808		0.406296	4.8723e-07		0.406296	2.01972e-06		0.406296	7.58581e-07		0.406296	1.25826e-06
0.40919	0.000576029		0.40919	0.00104351		0.40919	4.88836e-07		0.40919	2.03122e-06		0.40919	7.62218e-07		0.40919	1.25817e-06
0.412084	0.000614755		0.412084	0.0010545		0.412084	4.9074e-07		0.412084	2.04397e-06		0.412084	7.65674e-07		0.412084	1.25775e-06
0.414977	0.000659968		0.414977	0.00105158		0.414977	4.9288e-07		0.414977	2.0578e-06		0.414977	7.689e-07		0.414977	1.25693e-06
0.417871	0.000710933		0.417871	0.00103588		0.417871	4.95203e-07		0.417871	2.07249e-06		0.417871	7.71872e-07		0.417871	1.25567e-06
0.420765	0.00076403		0.420765	0.00101167		0.420765	4.97671e-07		0.420765	2.08789e-06		0.420765	7.74582e-07		0.420765	1.254e-06
0.423659	0.000811681		0.423659	0.000980956		0.423659	5.00266e-07		0.423659	2.10385e-06		0.423659	7.77026e-07		0.423659	1.25195e-06
0.426553	0.000849635		0.426553	0.000943447		0.426553	5.02988e-07		0.426553	2.12028e-06		0.426553	7.79198e-07		0.426553	1.24944e-06
0.429447	0.000878848		0.429447	0.000902772		0.429447	5.05847e-07		0.429447	2.13712e-06		0.429447	7.81091e-07		0.429447	1.24642e-06
0.432341	0.000893361		0.432341	0.000861676		0.432341	5.08854e-07		0.432341	2.15434e-06		0.432341	7.82702e-07		0.432341	1.24296e-06
0.435235	0.000891391		0.435235	0.000817268		0.435235	5.12017e-07		0.435235	2.1719e-06		0.435235	7.84041e-07		0.435235	1.23911e-06
0.438129	0.000878631		0.438129	0.000769625		0.438129	5.15343e-07		0.438129	2.18979e-06		0.438129	7.8511e-07		0.438129	1.23487e-06
0.441023	0.000856935		0.441023	0.00072202		0.441023	5.18832e-07		0.441023	2.20794e-06		0.441023	7.85915e-07		0.441023	1.23047e-06
0.443916	0.000827362		0.443916	0.000675881		0.443916	5.22478e-07		0.443916	2.2263e-06		0.443916	7.86418e-07		0.443916	1.22614e-06
0.44681	0.000793184		0.44681	0.000631092		0.44681	5.26245e-07		0.44681	2.24477e-06		0.44681	7.86537e-07		0.44681	1.2219e-06
0.449704	0.000756719		0.449704	0.00058799		0.449704	5.30102e-07		0.449704	2.26322e-06		0.449704	7.86489e-07		0.449704	1.21772e-06
0.452598	0.000717123		0.452598	0.000546964		0.452598	5.34045e-07		0.452598	2.28154e-06		0.452598	7.86532e-07		0.452598	1.21359e-06
0.455492	0.000675104		0.455492	0.000507881		0.455492	5.38078e-07		0.455492	2.29953e-06		0.455492	7.86683e-07		0.455492	1.20951e-06
0.458386	0.000632114		0.458386	0.000470611		0.458386	5.42194e-07		0.458386	2.31701e-06		0.458386	7.86946e-07		0.458386	1.20547e-06
0.46128	0.000589931		0.46128	0.000435228		0.46128	5.46383e-07		0.46128	2.33371e-06		0.46128	7.8732e-07		0.46128	1.20146e-06
0.464174	0.000549542		0.464174	0.0004018		0.464174	5.50635e-07		0.464174	2.34936e-06		0.464174	7.87801e-07		0.464174	1.19747e-06
0.467068	0.000510421		0.467068	0.000370411		0.467068	5.5491e-07		0.467068	2.36493e-06		0.467068	7.88369e-07		0.467068	1.19349e-06
0.469961	0.000472644		0.469961	0.000341123		0.469961	5.59128e-07		0.469961	2.38157e-06		0.469961	7.88988e-07		0.469961	1.18949e-06
0.472855	0.000436727		0.472855	0.000313756		0.472855	5.63218e-07		0.472855	2.39928e-06		0.472855	7.89621e-07		0.472855	1.18545e-06
0.475749	0.00040266		0.475749	0.00028838		0.475749	5.6723e-07		0.475749	2.4181e-06		0.475749	7.90254e-07		0.475749	1.18134e-06
0.478643	0.00037078		0.478643	0.000264913		0.478643	5.7136e-07		0.478643	2.43801e-06		0.478643	7.90867e-07		0.478643	1.1774e-06
0.481537	0.000341659		0.481537	0.000243216		0.481537	5.7555e-07		0.481537	2.45896e-06		0.481537	7.91438e-07		0.481537	1.17384e-06
0.484431	0.000315043		0.484431	0.000223227		0.484431	5.79512e-07		0.484431	2.48089e-06		0.484431	7.91936e-07		0.484431	1.17065e-06
0.487325	0.000289912		0.487325	0.000204791		0.487325	5.83102e-07		0.487325	2.50372e-06		0.487325	7.92318e-07		0.487325	1.16784e-06
0.490219	0.000265912		0.490219	0.000187727		0.490219	5.86637e-07		0.490219	2.52734e-06		0.490219	7.92536e-07		0.490219	1.16538e-06
0.493113	0.000243426		0.493113	0.000172103		0.493113	5.90489e-07		0.493113	2.55164e-06		0.493113	7.92536e-07		0.493113	1.16327e-06
0.496006	0.00022261		0.496006	0.00015798		0.496006	5.9469e-07		0.496006	2.57649e-06		0.496006	7.92566e-07		0.496006	1.1615e-06
0.4989	0.000203397		0.4989	0.000145201		0.4989	5.99229e-07		0.4989	2.60173e-06		0.4989	7.929e-07		0.4989	1.16004e-06
0.501794	0.000185967		0.501794	0.000133584		0.501794	6.0407e-07		0.501794	2.62722e-06		0.501794	7.93515e-07		0.501794	1.15888e-06
0.504688	0.000170149		0.504688	0.000122759		0.504688	6.0918e-07		0.504688	2.65274e-06		0.504688	7.94386e-07		0.504688	1.158e-06
0.507582	0.000155748		0.507582	0.000112759		0.507582	6.14524e-07		0.507582	2.67809e-06		0.507582	7.95484e-07		0.507582	1.15736e-06
0.510476	0.000142677		0.510476	0.000103505		0.510476	6.20062e-07		0.510476	2.70299e-06		0.510476	7.96787e-07		0.510476	1.15692e-06
0.51337	0.000130671		0.51337	9.4874e-05		0.51337	6.25737e-07		0.51337	2.72712e-06		0.51337	7.98269e-07		0.51337	1.15664e-06
0.516264	0.000119656		0.516264	8.70105e-05		0.516264	6.31414e-07		0.516264	2.75008e-06		0.516264	7.99896e-07		0.516264	1.15646e-06
0.519158	0.000109482		0.519158	7.99712e-05		0.519158	6.36908e-07		0.519158	2.7714e-06		0.519158	8.01625e-07		0.519158	1.15628e-06
0.522051	0.00010019		0.522051	7.36152e-05		0.522051	6.42045e-07		0.522051	2.79041e-06		0.522051	8.03391e-07		0.522051	1.15602e-06
0.524945	9.18772e-05		0.524945	6.78981e-05		0.524945	6.46622e-07		0.524945	2.80627e-06		0.524945	8.05103e-07		0.524945	1.15553e-06
0.524945	9.18772e-05		0.524945	6.78981e-05		0.524945	6.46622e-07		0.524945	2.80627e-06		0.524945	8.05103e-07		0.524945	1.15553e-06
0.527839	8.4349e-05		0.527839	6.27271e-05		0.527839	6.50985e-07		0.527839	2.82096e-06		0.527839	8.0679e-07		0.527839	1.15492e-06
0.530733	7.74754e-05		0.530733	5.79263e-05		0.530733	6.55592e-07		0.530733	2.83699e-06		0.530733	8.08528e-07		0.530733	1.15438e-06
0.533627	7.11771e-05		0.533627	5.34827e-05		0.533627	6.60433e-07		0.533627	2.85442e-06		0.533627	8.10292e-07		0.533627	1.15387e-06
0.536521	6.53783e-05		0.536521	4.93941e-05		0.536521	6.65499e-07		0.536521	2.87322e-06		0.536521	8.12042e-07		0.536521	1.15336e-06
0.539415	6.00626e-05		0.539415	4.56409e-05		0.539415	6.70775e-07		0.539415	2.89336e-06		0.539415	8.13735e-07		0.539415	1.1528e-06
0.542309	5.52197e-05		0.542309	4.21824e-05		0.542309	6.76252e-07		0.542309	2.91483e-06		0.542309	8.1553e-07		0.542309	1.15216e-06
0.545203	5.08139e-05		0.545203	3.9001e-05		0.545203	6.81912e-07		0.545203	2.93764e-06		0.545203	8.17611e-07		0.545203	1.15137e-06
0.548096	4.68463e-05		0.548096	3.60959e-05		0.548096	6.87705e-07		0.548096	2.9617e-06		0.548096	8.19956e-07		0.548096	1.15038e-06
0.55099	4.33164e-05		0.55099	3.34324e-05		0.55099	6.93568e-07		0.55099	2.98688e-06		0.55099	8.22538e-07		0.55099	1.14908e-06
0.553884	4.01121e-05		0.553884	3.0993e-05		0.553884	6.99427e-07		0.553884	3.01304e-06		0.553884	8.25323e-07		0.553884	1.1478e-06
0.556778	3.71173e-05		0.556778	2.8751e-05		0.556778	7.05197e-07		0.556778	3.04001e-06		0.556778	8.28275e-07		0.556778	1.14686e-06
0.559672	3.43155e-05		0.559672	2.66854e-05		0.559672	7.10782e-07		0.559672	3.06761e-06		0.559672	8.31358e-07		0.559672	1.14624e-06
0.562566	3.17411e-05		0.562566	2.4792e-05		0.562566	7.16075e-07		0.562566	3.09563e-06		0.562566	8.34536e-07		0.562566	1.1459e-06
0.56546	2.93717e-05		0.56546	2.30586e-05		0.56546	7.20953e-07		0.56546	3.12383e-06		0.56546	8.37774e-07		0.56546	1.14579e-06
0.568354	2.71608e-05		0.568354	2.14738e-05		0.568354	7.25831e-07		0.568354	3.15196e-06		0.568354	8.41032e-07		0.568354	1.14588e-06
0.571248	2.51172e-05		0.571248	2.00236e-05		0.571248	7.31179e-07		0.571248	3.17973e-06		0.571248	8.4427e-07		0.571248	1.14612e-06
0.574142	2.32543e-05		0.574142	1.86812e-05		0.574142	7.36967e-07		0.574142	3.20682e-06		0.574142	8.47446e-07		0.574142	1.14647e-06
0.577035	2.15589e-05		0.577035	1.74292e-05		0.577035	7.43155e-07		0.577035	3.23286e-06		0.577035	8.50517e-07		0.577035	1.14688e-06
0.579929	2.00147e-05		0.579929	1.62642e-05		0.579929	7.49715e-07		0.579929	3.25747e-06		0.579929	8.53436e-07		0.579929	1.14729e-06
0.582823	1.86062e-05		0.582823	1.51784e-05		0.582823	7.56625e-07		0.582823	3.2802e-06		0.582823	8.56155e-07		0.582823	1.14767e-06
0.585717	1.73133e-05		0.585717	1.41668e-05		0.585717	7.6386e-07		0.585717	3.30241e-06		0.585717	8.58623e-07		0.585717	1.14796e-06
0.588611	1.61222e-05		0.588611	1.32276e-05		0.588611	7.71397e-07		0.588611	3.32571e-06		0.588611	8.60781e-07		0.588611	1.14811e-06
0.591505	1.50281e-05		0.591505	1.23596e-05		0.591505	7.79212e-07		0.591505	3.35004e-06		0.591505	8.62882e-07		0.591505	1.14807e-06
0.594399	1.40234e-05		0.594399	1.15595e-05		0.594399	7.87279e-07		0.594399	3.37532e-06		0.594399	8.65211e-07		0.594399	1.14779e-06
0.597293	1.31017e-05		0.597293	1.08224e-05		0.597293	7.95572e-07		0.597293	3.40147e-06		0.597293	8.67759e-07		0.597293	1.14753e-06
0.600186	1.22549e-05		0.600186	1.01439e-05		0.600186	8.04064e-07		0.600186	3.42838e-06		0.600186	8.70506e-07		0.600186	1.1476e-06
0.60308	1.14715e-05		0.60308	9.52031e-06		0.60308	8.12725e-07		0.60308	3.45596e-06		0.60308	8.73428e-07		0.60308	1.14797e-06
0.605974	1.07389e-05		0.605974	8.94735e-06		0.605974	8.21524e-07		0.605974	3.48413e-06		0.605974	8.76504e-07		0.605974	1.14863e-06
0.608868	1.00485e-05		0.608868	8.42087e-06		0.608868	8.30427e-07		0.608868	3.51278e-06		0.608868	8.79713e-07		0.608868	1.14957e-06
0.611762	9.39857e-06		0.611762	7.93626e-06		0.611762	8.39396e-07		0.611762	3.54183e-06		0.611762	8.83032e-07		0.611762	1.15075e-06
0.614656	8.79013e-06		0.614656	7.4879e-06		0.614656	8.48388e-07		0.614656	3.57116e-06		0.614656	8.8644e-07		0.614656	1.15218e-06
0.61755	8.22272e-06		0.61755	7.06653e-06		0.61755	8.57355e-07		0.61755	3.60067e-06		0.61755	8.89914e-07		0.61755	1.15382e-06
0.620444	7.69525e-06		0.620444	6.66768e-06		0.620444	8.66249e-07		0.620444	3.63023e-06		0.620444	8.93432e-07		0.620444	1.15568e-06
0.623338	7.20607e-06		0.623338	6.29298e-06		0.623338	8.75011e-07		0.623338	3.65974e-06		0.623338	8.96968e-07		0.623338	1.15775e-06
0.626231	6.75287e-06		0.626231	5.94187e-06		0.626231	8.8358e-07		0.626231	3.68904e-06		0.626231	9.00498e-07		0.626231	1.16002e-06
0.629125	6.33364e-06		0.629125	5.61376e-06		0.629125	8.91885e-07		0.629125	3.71801e-06		0.629125	9.03995e-07		0.629125	1.16249e-06
0.632019	5.94714e-06		0.632019	5.30818e-06		0.632019	8.99849e-07		0.632019	3.74648e-06		0.632019	9.07434e-07		0.632019	1.16519e-06
0.634913	5.5925e-06		0.634913	5.02472e-06		0.634913	9.07384e-07		0.634913	3.77433e-06		0.634913	9.10789e-07		0.634913	1.16813e-06
0.637807	5.26529e-06		0.637807	4.76293e-06		0.637807	9.14392e-07		0.637807	3.80143e-06		0.637807	9.14039e-07		0.637807	1.17137e-06
0.640701	4.96294e-06		0.640701	4.52259e-06		0.640701	9.20752e-07		0.640701	3.82768e-06		0.640701	9.17421e-07		0.640701	1.17494e-06
0.643595	4.68651e-06		0.643595	4.30435e-06		0.643595	9.2703e-07		0.643595	3.85294e-06		0.643595	9.21225e-07		0.643595	1.17887e-06
0.643595	4.68651e-06		0.643595	4.30435e-06		0.643595	9.2703e-07		0.643595	3.85294e-06		0.643595	9.21225e-07		0.643595	1.17887e-06
0.646489	4.43216e-06		0.646489	4.10364e-06		0.646489	9.33713e-07		0.646489	3.87702e-06		0.646489	9.25289e-07		0.646489	1.183e-06
0.649383	4.19381e-06		0.649383	3.91517e-06		0.649383	9.40691e-07		0.649383	3.90095e-06		0.649383	9.29431e-07		0.649383	1.18716e-06
0.652277	3.96991e-06		0.652277	3.73877e-06		0.652277	9.47977e-07		0.652277	3.92582e-06		0.652277	9.33643e-07		0.652277	1.19134e-06
0.65517	3.76284e-06		0.65517	3.57432e-06		0.65517	9.55536e-07		0.65517	3.95149e-06		0.65517	9.37881e-07		0.65517	1.1955e-06
0.658064	3.57093e-06		0.658064	3.41908e-06		0.658064	9.63338e-07		0.658064	3.97778e-06		0.658064	9.42107e-07		0.658064	1.19958e-06
0.660958	3.39163e-06		0.660958	3.27096e-06		0.660958	9.71363e-07		0.660958	4.00454e-06		0.660958	9.4629e-07		0.660958	1.20355e-06
0.663852	3.22499e-06		0.663852	3.13133e-06		0.663852	9.79603e-07		0.663852	4.03166e-06		0.663852	9.5041e-07		0.663852	1.20736e-06
0.666746	3.06997e-06		0.666746	3.00157e-06		0.666746	9.88033e-07		0.666746	4.05898e-06		0.666746	9.54435e-07		0.666746	1.21099e-06
0.66964	2.92396e-06		0.66964	2.88196e-06		0.66964	9.96634e-07		0.66964	4.08636e-06		0.66964	9.58336e-07		0.66964	1.21438e-06
0.672534	2.78515e-06		0.672534	2.7718e-06		0.672534	1.00539e-06		0.672534	4.11371e-06		0.672534	9.62086e-07		0.672534	1.21749e-06
0.675428	2.64847e-06		0.675428	2.66975e-06		0.675428	1.01427e-06		0.675428	4.14094e-06		0.675428	9.65658e-07		0.675428	1.2203e-06
0.678322	2.51893e-06		0.678322	2.57299e-06		0.678322	1.02326e-06		0.678322	4.16797e-06		0.678322	9.69021e-07		0.678322	1.22276e-06
0.681215	2.40143e-06		0.681215	2.48037e-06		0.681215	1.03234e-06		0.681215	4.19469e-06		0.681215	9.72143e-07		0.681215	1.22482e-06
0.684109	2.2976e-06		0.684109	2.39166e-06		0.684109	1.04145e-06		0.684109	4.221e-06		0.684109	9.74986e-07		0.684109	1.22644e-06
0.687003	2.20324e-06		0.687003	2.30958e-06		0.687003	1.05058e-06		0.687003	4.24677e-06		0.687003	9.7751e-07		0.687003	1.22782e-06
0.689897	2.12054e-06		0.689897	2.23205e-06		0.689897	1.05967e-06		0.689897	4.27183e-06		0.689897	9.79664e-07		0.689897	1.22923e-06
0.692791	2.05069e-06		0.692791	2.15976e-06		0.692791	1.06867e-06		0.692791	4.296e-06		0.692791	9.81386e-07		0.692791	1.23064e-06
0.695685	1.98243e-06		0.695685	2.10143e-06		0.695685	1.07752e-06		0.695685	4.31906e-06		0.695685	9.82902e-07		0.695685	1.232e-06
0.698579	1.91712e-06		0.698579	2.05106e-06		0.698579	1.08613e-06		0.698579	4.34073e-06		0.698579	9.84467e-07		0.698579	1.23327e-06
0.701473	1.85557e-06		0.701473	2.00583e-06		0.701473	1.0944e-06		0.701473	4.36067e-06		0.701473	9.86044e-07		0.701473	1.2344e-06
0.704367	1.79818e-06		0.704367	1.96612e-06		0.704367	1.1022e-06		0.704367	4.37842e-06		0.704367	9.87568e-07		0.704367	1.23533e-06
0.70726	1.74511e-06		0.70726	1.92789e-06		0.70726	1.10936e-06		0.70726	4.39341e-06		0.70726	9.88961e-07		0.70726	1.23595e-06
0.710154	1.69647e-06		0.710154	1.89253e-06		0.710154	1.11564e-06		0.710154	4.40482e-06		0.710154	9.90117e-07		0.710154	1.23616e-06
0.713048	1.65243e-06		0.713048	1.86066e-06		0.713048	1.12069e-06		0.713048	4.41335e-06		0.713048	9.90885e-07		0.713048	1.23578e-06
0.715942	1.61292e-06		0.715942	1.83241e-06		0.715942	1.12391e-06		0.715942	4.41952e-06		0.715942	9.90992e-07		0.715942	1.23447e-06
0.715942	1.61292e-06		0.715942	1.83241e-06		0.715942	1.12391e-06		0.715942	4.41952e-06		0.715942	9.90992e-07		0.715942	1.23447e-06
0.718836	1.57715e-06		0.718836	1.80733e-06		0.718836	1.12615e-06		0.718836	4.42447e-06		0.718836	9.90695e-07		0.718836	1.23257e-06
0.72173	1.54419e-06		0.72173	1.78453e-06		0.72173	1.12861e-06		0.72173	4.42973e-06		0.72173	9.90373e-07		0.72173	1.23056e-06
0.724624	1.51378e-06		0.724624	1.76367e-06		0.724624	1.13116e-06		0.724624	4.43497e-06		0.724624	9.89975e-07		0.724624	1.22841e-06
0.727518	1.48614e-06		0.727518	1.74496e-06		0.727518	1.13373e-06		0.727518	4.44013e-06		0.727518	9.89506e-07		0.727518	1.22611e-06
0.730412	1.46138e-06		0.730412	1.7284e-06		0.730412	1.13633e-06		0.730412	4.44509e-06		0.730412	9.88965e-07		0.730412	1.22367e-06
0.733305	1.43909e-06		0.733305	1.71393e-06		0.733305	1.13897e-06		0.733305	4.44972e-06		0.733305	9.88348e-07		0.733305	1.22107e-06
0.736199	1.41874e-06		0.736199	1.70124e-06		0.736199	1.14164e-06		0.736199	4.45391e-06		0.736199	9.87646e-07		0.736199	1.21828e-06
0.739093	1.40034e-06		0.739093	1.69011e-06		0.739093	1.14432e-06		0.739093	4.45758e-06		0.739093	9.86848e-07		0.739093	1.21526e-06
0.741987	1.38392e-06		0.741987	1.68055e-06		0.741987	1.14698e-06		0.741987	4.46061e-06		0.741987	9.8594e-07		0.741987	1.212e-06
0.744881	1.36955e-06		0.744881	1.67255e-06		0.744881	1.1496e-06		0.744881	4.46291e-06		0.744881	9.84909e-07		0.744881	1.20847e-06
0.747775	1.35727e-06		0.747775	1.66608e-06		0.747775	1.15212e-06		0.747775	4.46433e-06		0.747775	9.83742e-07		0.747775	1.20462e-06
0.750669	1.34714e-06		0.750669	1.66114e-06		0.750669	1.15453e-06		0.750669	4.46472e-06		0.750669	9.82331e-07		0.750669	1.20043e-06
0.753563	1.33882e-06		0.753563	1.6577e-06		0.753563	1.15678e-06		0.753563	4.46392e-06		0.753563	9.80551e-07		0.753563	1.19586e-06
0.756457	1.33186e-06		0.756457	1.65563e-06		0.756457	1.15882e-06		0.756457	4.46171e-06		0.756457	9.78365e-07		0.756457	1.19087e-06
0.75935	1.32618e-06		0.75935	1.65474e-06		0.75935	1.1606e-06		0.75935	4.45791e-06		0.75935	9.75743e-07		0.75935	1.18542e-06
0.762244	1.3218e-06		0.762244	1.65498e-06		0.762244	1.16204e-06		0.762244	4.45229e-06		0.762244	9.72653e-07		0.762244	1.17946e-06
0.765138	1.31868e-06		0.765138	1.65626e-06		0.765138	1.16301e-06		0.765138	4.44462e-06		0.765138	9.69063e-07		0.765138	1.17298e-06
0.768032	1.31678e-06		0.768032	1.65848e-06		0.768032	1.16341e-06		0.768032	4.43467e-06		0.768032	9.64941e-07		0.768032	1.16594e-06
0.770926	1.31605e-06		0.770926	1.66154e-06		0.770926	1.16316e-06		0.770926	4.42221e-06		0.770926	9.60254e-07		0.770926	1.15833e-06
0.77382	1.31641e-06		0.77382	1.66525e-06		0.77382	1.16214e-06		0.77382	4.40706e-06		0.77382	9.54968e-07		0.77382	1.15014e-06
0.776714	1.31771e-06		0.776714	1.66939e-06		0.776714	1.16021e-06		0.776714	4.38836e-06		0.776714	9.49041e-07		0.776714	1.14124e-06
0.779608	1.3198e-06		0.779608	1.67373e-06		0.779608	1.15718e-06		0.779608	4.36515e-06		0.779608	9.4243e-07		0.779608	1.1315e-06
0.782502	1.32251e-06		0.782502	1.6781e-06		0.782502	1.15294e-06		0.782502	4.33717e-06		0.782502	9.35107e-07		0.782502	1.12092e-06
0.785396	1.32571e-06		0.785396	1.68224e-06		0.785396	1.14746e-06		0.785396	4.30426e-06		0.785396	9.2707e-07		0.785396	1.10951e-06
0.788289	1.32922e-06		0.788289	1.6858e-06		0.788289	1.14069e-06		0.788289	4.26634e-06		0.788289	9.18345e-07		0.788289	1.09729e-06
0.791183	1.33276e-06		0.791183	1.68837e-06		0.791183	1.13263e-06		0.791183	4.22341e-06		0.791183	9.08775e-07		0.791183	1.08431e-06
0.794077	1.33601e-06		0.794077	1.68954e-06		0.794077	1.12306e-06		0.794077	4.17553e-06		0.794077	8.98165e-07		0.794077	1.07061e-06
0.796971	1.3386e-06		0.796971	1.68887e-06		0.796971	1.11177e-06		0.796971	4.12291e-06		0.796971	8.86487e-07		0.796971	1.05622e-06
0.799865	1.34013e-06		0.799865	1.68592e-06		0.799865	1.09899e-06		0.799865	4.06576e-06		0.799865	8.73711e-07		0.799865	1.0412e-06
0.799865	1.34013e-06		0.799865	1.68592e-06		0.799865	1.09899e-06		0.799865	4.06576e-06		0.799865	8.73711e-07		0.799865	1.0412e-06
0.802759	1.34018e-06		0.802759	1.68041e-06		0.802759	1.08431e-06		0.802759	4.00354e-06		0.802759	8.59794e-07		0.802759	1.02522e-06
0.805653	1.33848e-06		0.805653	1.67224e-06		0.805653	1.06707e-06		0.805653	3.93603e-06		0.805653	8.44757e-07		0.805653	1.00799e-06
0.808547	1.33487e-06		0.808547	1.66126e-06		0.808547	1.04741e-06		0.808547	3.86387e-06		0.808547	8.28678e-07		0.808547	9.89567e-07
0.811441	1.32916e-06		0.811441	1.64729e-06		0.811441	1.02556e-06		0.811441	3.78749e-06		0.811441	8.11621e-07		0.811441	9.70018e-07
0.814334	1.32117e-06		0.814334	1.63021e-06		0.814334	1.0017e-06		0.814334	3.70658e-06		0.814334	7.93656e-07		0.814334	9.49406e-07
0.817228	1.31076e-06		0.817228	1.61004e-06		0.817228	9.77482e-07		0.817228	3.61998e-06		0.817228	7.748e-07		0.817228	9.27812e-07
0.820122	1.29787e-06		0.820122	1.58677e-06		0.820122	9.55483e-07		0.820122	3.52733e-06		0.820122	7.54932e-07		0.820122	9.05351e-07
0.823016	1.28246e-06		0.823016	1.56043e-06		0.823016	9.33134e-07		0.823016	3.42942e-06		0.823016	7.34026e-07		0.823016	8.81914e-07
0.82591	1.26453e-06		0.82591	1.53109e-06		0.82591	9.03648e-07		0.82591	3.32726e-06		0.82591	7.12245e-07		0.82591	8.57373e-07
0.828804	1.2441e-06		0.828804	1.49887e-06		0.828804	8.68095e-07		0.828804	3.22168e-06		0.828804	6.8979e-07		0.828804	8.31863e-07
0.831698	1.22125e-06		0.831698	1.46397e-06		0.831698	8.33527e-07		0.831698	3.11329e-06		0.831698	6.66875e-07		0.831698	8.05573e-07
0.834592	1.19615e-06		0.834592	1.42657e-06		0.834592	8.02856e-07		0.834592	3.00276e-06		0.834592	6.43657e-07		0.834592	7.7874e-07
0.837486	1.16898e-06		0.837486	1.38697e-06		0.837486	7.74663e-07		0.837486	2.89084e-06		0.837486	6.20138e-07		0.837486	7.51597e-07
0.840379	1.13999e-06		0.840379	1.34569e-06		0.840379	7.42512e-07		0.840379	2.77801e-06		0.840379	5.9641e-07		0.840379	7.24187e-07
0.843273	1.10944e-06		0.843273	1.30313e-06		0.843273	7.00113e-07		0.843273	2.66536e-06		0.843273	5.72683e-07		0.843273	6.96636e-07
0.846167	1.07763e-06		0.846167	1.25971e-06		0.846167	6.56153e-07		0.846167	2.55425e-06		0.846167	5.49093e-07		0.846167	6.69217e-07
0.849061	1.04485e-06		0.849061	1.21582e-06		0.849061	6.25376e-07		0.849061	2.4449e-06		0.849061	5.25771e-07		0.849061	6.42092e-07
0.851955	1.01138e-06		0.851955	1.17183e-06		0.851955	6.05106e-07		0.851955	2.33656e-06		0.851955	5.02846e-07		0.851955	6.15414e-07
0.854849	9.775e-07		0.854849	1.12806e-06		0.854849	5.84515e-07		0.854849	2.22911e-06		0.854849	4.80449e-07		0.854849	5.89339e-07
0.857743	9.4347e-07		0.857743	1.08481e-06		0.857743	5.60399e-07		0.857743	2.12423e-06		0.857743	4.58713e-07		0.857743	5.64031e-07
0.860637	9.09551e-07		0.860637	1.04238e-06		0.860637	5.34061e-07		0.860637	2.02446e-06		0.860637	4.37788e-07		0.860637	5.39662e-07
0.863531	8.7606e-07		0.863531	1.00112e-06		0.863531	5.08096e-07		0.863531	1.93294e-06		0.863531	4.17874e-07		0.863531	5.16437e-07
0.866424	8.43488e-07		0.866424	9.61625e-07		0.866424	4.86113e-07		0.866424	1.85108e-06		0.866424	3.99279e-07		0.866424	4.9462e-07
0.869318	8.12794e-07		0.869318	9.24991e-07		0.869318	4.72672e-07		0.869318	1.77198e-06		0.869318	3.82498e-07		0.869318	4.74596e-07
0.872212	7.8604e-07		0.872212	8.93351e-07		0.872212	4.6653e-07		0.872212	1.70439e-06		0.872212	3.68312e-07		0.872212	4.5705e-07
0.875106	7.67896e-07		0.875106	8.70393e-07		0.875106	4.49707e-07		0.875106	1.64689e-06		0.875106	3.5791e-07		0.875106	4.43893e-07
0.878	7.61828e-07		0.878	8.61706e-07		0.878	4.35151e-07		0.878	1.61669e-06		0.878	3.53896e-07		0.878	4.38849e-07

## Sheet: Radiation heat flux
SN 0			SN 0.2			SN 0.4			SN 0.6			SN 0.8			SN 1
Axial distance	Radiation heat flux W/m2		Axial distance	Radiation heat flux W/m2		Axial distance	Radiation heat flux W/m2		Axial distance	Radiation heat flux W/m2		Axial distance	Radiation heat flux W/m2		Axial distance	Radiation heat flux W/m2
0.00115113	9616.11		0.00115113	9985.89		0.00115113	18472.5		0.00115113	23811.9		0.00115113	28131.3		0.00115113	32870.3
0.00404502	9688.1		0.00404502	10066.3		0.00404502	18709.1		0.00404502	23904.1		0.00404502	28483.8		0.00404502	33106.9
0.00693891	9762.12		0.00693891	10150.9		0.00693891	18950.4		0.00693891	24027.9		0.00693891	28786.1		0.00693891	33282.8
0.0098328	9852.8		0.0098328	10248.6		0.0098328	19208.4		0.0098328	24214.2		0.0098328	29053.4		0.0098328	33401.1
0.0127267	9964.87		0.0127267	10363.6		0.0127267	19498.2		0.0127267	24487.7		0.0127267	29304.2		0.0127267	33516.9
0.0156206	10094.4		0.0156206	10494.6		0.0156206	19817.1		0.0156206	24844		0.0156206	29548.6		0.0156206	33740.5
0.0185145	10231.9		0.0185145	10629.9		0.0185145	20154.4		0.0185145	25266.2		0.0185145	29801.9		0.0185145	34144
0.0214084	10371.5		0.0214084	10763		0.0214084	20500.6		0.0214084	25736.5		0.0214084	30049.8		0.0214084	34728.1
0.0243023	10508.1		0.0243023	10889.7		0.0243023	20837.3		0.0243023	26220.9		0.0243023	30320.2		0.0243023	35435.9
0.0271961	10636.3		0.0271961	11008		0.0271961	21154.4		0.0271961	26679.4		0.0271961	30684.9		0.0271961	36176.9
0.03009	10754.3		0.03009	11119.4		0.03009	21446.3		0.03009	27081.6		0.03009	31165.8		0.03009	36855.6
0.0329839	10861.5		0.0329839	11224.3		0.0329839	21709.9		0.0329839	27416.4		0.0329839	31738.8		0.0329839	37411.8
0.0358778	10960.4		0.0358778	11324.3		0.0358778	21944.3		0.0358778	27703		0.0358778	32346.2		0.0358778	37843.2
0.0387717	11052.9		0.0387717	11420.9		0.0387717	22150.5		0.0387717	27976.3		0.0387717	32912.8		0.0387717	38176.5
0.0416656	11139.6		0.0416656	11517.6		0.0416656	22329.6		0.0416656	28246.1		0.0416656	33381.2		0.0416656	38364.6
0.0445595	11221.8		0.0445595	11617.1		0.0445595	22485.2		0.0445595	28556.5		0.0445595	33744.9		0.0445595	38485.3
0.0474534	11300.4		0.0474534	11718.7		0.0474534	22627.2		0.0474534	28963.5		0.0474534	34045.9		0.0474534	38686.5
0.0503473	11376.9		0.0503473	11819.3		0.0503473	22771.4		0.0503473	29458.3		0.0503473	34257.9		0.0503473	38973.4
0.0532412	11453.2		0.0532412	11918		0.0532412	22932.8		0.0532412	29995.7		0.0532412	34455		0.0532412	39306.4
0.056135	11531.4		0.056135	12016.1		0.056135	23123.6		0.056135	30528.4		0.056135	34784.1		0.056135	39529.1
0.0590289	11612.5		0.0590289	12113.4		0.0590289	23353.3		0.0590289	31050.8		0.0590289	35231.5		0.0590289	39631.1
0.0619228	11696.8		0.0619228	12209.6		0.0619228	23624.7		0.0619228	31620.7		0.0619228	35709.8		0.0619228	39756.4
0.0648167	11784.6		0.0648167	12304.1		0.0648167	23934.2		0.0648167	32204		0.0648167	36123		0.0648167	39941.6
0.0677106	11875.5		0.0677106	12397.1		0.0677106	24275.3		0.0677106	32744.6		0.0677106	36424.8		0.0677106	40206.6
0.0706045	11968.1		0.0706045	12489.2		0.0706045	24637.7		0.0706045	33188		0.0706045	36598.8		0.0706045	40564.4
0.0734984	12061.7		0.0734984	12581.4		0.0734984	25011.8		0.0734984	33324.5		0.0734984	36629.9		0.0734984	40986.3
0.0763923	12156.7		0.0763923	12674		0.0763923	25404.9		0.0763923	33218.1		0.0763923	36550.1		0.0763923	41371.8
0.0792862	12254.2		0.0792862	12767.4		0.0792862	25850.2		0.0792862	33063.4		0.0792862	36391.4		0.0792862	41622
0.0821801	12354.7		0.0821801	12861.8		0.0821801	26400.9		0.0821801	32862		0.0821801	36167.7		0.0821801	41699.4
0.085074	12457.7		0.085074	12956.8		0.085074	27107.2		0.085074	32629.2		0.085074	35959.1		0.085074	41620.2
0.085074	12457.7		0.085074	12956.8		0.085074	27107.2		0.085074	32629.2		0.085074	35959.1		0.085074	41620.2
0.0879678	12562		0.0879678	13052.8		0.0879678	27932.9		0.0879678	32388.8		0.0879678	35830.2		0.0879678	41490.1
0.0908617	12666.4		0.0908617	13149.9		0.0908617	28775.3		0.0908617	32140.5		0.0908617	35763.6		0.0908617	41394.1
0.0937556	12769.9		0.0937556	13248.4		0.0937556	29587.3		0.0937556	31889.6		0.0937556	35723.8		0.0937556	41331.7
0.0966495	12872		0.0966495	13348.7		0.0966495	30305.7		0.0966495	31668.2		0.0966495	35696.6		0.0966495	41285.6
0.0995434	12972.3		0.0995434	13451		0.0995434	30839.1		0.0995434	31501.1		0.0995434	35681.1		0.0995434	41247.3
0.102437	13070.4		0.102437	13555.2		0.102437	31104.6		0.102437	31391.1		0.102437	35673.9		0.102437	41214
0.105331	13166.2		0.105331	13661		0.105331	31092.1		0.105331	31321.3		0.105331	35669.4		0.105331	41180.9
0.108225	13259.7		0.108225	13768.1		0.108225	30930.5		0.108225	31270.1		0.108225	35663.8		0.108225	41145
0.111119	13350.8		0.111119	13875.6		0.111119	30689.3		0.111119	31228.7		0.111119	35649.9		0.111119	41100.6
0.114013	13439.4		0.114013	13982.7		0.114013	30406.2		0.114013	31196.2		0.114013	35623.8		0.114013	41046.8
0.116907	13525.5		0.116907	14088.3		0.116907	30130.4		0.116907	31170.6		0.116907	35587.3		0.116907	40986.2
0.119801	13609.3		0.119801	14191.7		0.119801	29855		0.119801	31148.4		0.119801	35541.3		0.119801	40920.1
0.122695	13690.8		0.122695	14292.4		0.122695	29577.7		0.122695	31128.9		0.122695	35490.3		0.122695	40854.8
0.125588	13770		0.125588	14389.7		0.125588	29293.5		0.125588	31108.2		0.125588	35438.7		0.125588	40792.3
0.128482	13846.9		0.128482	14483.7		0.128482	28992.1		0.128482	31083.7		0.128482	35387.9		0.128482	40732.5
0.131376	13921.4		0.131376	14574.5		0.131376	28687.7		0.131376	31057.4		0.131376	35336.9		0.131376	40673.7
0.13427	13993.6		0.13427	14662.2		0.13427	28405.9		0.13427	31027.4		0.13427	35286.3		0.13427	40612.7
0.137164	14063.7		0.137164	14747.1		0.137164	28152.3		0.137164	30991.3		0.137164	35237.6		0.137164	40549.6
0.140058	14131.8		0.140058	14829.3		0.140058	27923.6		0.140058	30947.1		0.140058	35188.7		0.140058	40485.2
0.142952	14197.8		0.142952	14909.5		0.142952	27718		0.142952	30894.1		0.142952	35140		0.142952	40419.6
0.145846	14261.6		0.145846	14987.9		0.145846	27536.7		0.145846	30833.1		0.145846	35092.6		0.145846	40353.3
0.14874	14323.1		0.14874	15064.9		0.14874	27376		0.14874	30765.3		0.14874	35046.1		0.14874	40287.1
0.151633	14382.5		0.151633	15140.7		0.151633	27227.7		0.151633	30695.9		0.151633	35001		0.151633	40221.5
0.154527	14439.8		0.154527	15215.5		0.154527	27089.3		0.154527	30629.1		0.154527	34957.4		0.154527	40156.8
0.157421	14495.1		0.157421	15289.8		0.157421	26965.5		0.157421	30564.5		0.157421	34915.4		0.157421	40093.3
0.160315	14548.6		0.160315	15364		0.160315	26857.9		0.160315	30505		0.160315	34875.1		0.160315	40031.2
0.163209	14600.4		0.163209	15438.5		0.163209	26764.8		0.163209	30452.4		0.163209	34836.8		0.163209	39970.4
0.166103	14650.7		0.166103	15513.7		0.166103	26685.2		0.166103	30406.4		0.166103	34800.2		0.166103	39910.4
0.166103	14650.7		0.166103	15513.7		0.166103	26685.2		0.166103	30406.4		0.166103	34800.2		0.166103	39910.4
0.168997	14699.8		0.168997	15590.1		0.168997	26615.7		0.168997	30367.4		0.168997	34764.9		0.168997	39851
0.171891	14748.1		0.171891	15667.9		0.171891	26553.1		0.171891	30334.4		0.171891	34730.4		0.171891	39791.8
0.174785	14795.6		0.174785	15747.5		0.174785	26494.7		0.174785	30306.6		0.174785	34696.6		0.174785	39732.4
0.177678	14842.6		0.177678	15828.8		0.177678	26438.6		0.177678	30283.1		0.177678	34662.9		0.177678	39672.8
0.180572	14889.2		0.180572	15911.9		0.180572	26383.3		0.180572	30263.4		0.180572	34629.1		0.180572	39612.7
0.183466	14935.4		0.183466	15997.1		0.183466	26327.6		0.183466	30246.6		0.183466	34594.7		0.183466	39551.8
0.18636	14981.6		0.18636	16084.2		0.18636	26270.7		0.18636	30231.8		0.18636	34559.4		0.18636	39490.2
0.189254	15028		0.189254	16173.4		0.189254	26212.6		0.189254	30218.6		0.189254	34523		0.189254	39428
0.192148	15074.9		0.192148	16264.5		0.192148	26152.8		0.192148	30206.8		0.192148	34485.5		0.192148	39364.9
0.195042	15122.5		0.195042	16357.6		0.195042	26093.2		0.195042	30195.5		0.195042	34446.9		0.195042	39299.7
0.197936	15171		0.197936	16452.7		0.197936	26035.5		0.197936	30184.2		0.197936	34406.7		0.197936	39232.3
0.20083	15220.5		0.20083	16549.6		0.20083	25977.8		0.20083	30172.2		0.20083	34363.9		0.20083	39163.7
0.203723	15271.3		0.203723	16648.4		0.203723	25921.5		0.203723	30159.3		0.203723	34318.9		0.203723	39095.1
0.206617	15323.3		0.206617	16749.2		0.206617	25869.4		0.206617	30144.7		0.206617	34272.7		0.206617	39026.3
0.209511	15376.7		0.209511	16851.9		0.209511	25822.9		0.209511	30127.1		0.209511	34226.1		0.209511	38956.5
0.212405	15431.7		0.212405	16956.6		0.212405	25783.9		0.212405	30106		0.212405	34179.3		0.212405	38885.8
0.215299	15488.5		0.215299	17063.3		0.215299	25753.2		0.215299	30082		0.215299	34132.4		0.215299	38814.8
0.215299	15488.5		0.215299	17063.3		0.215299	25753.2		0.215299	30082		0.215299	34132.4		0.215299	38814.8
0.218193	15547.3		0.218193	17171.7		0.218193	25730.7		0.218193	30055.8		0.218193	34084.8		0.218193	38743.3
0.221087	15607.9		0.221087	17282.1		0.221087	25715.9		0.221087	30027.9		0.221087	34036.4		0.221087	38671.2
0.223981	15670.7		0.223981	17395		0.223981	25708		0.223981	29998.4		0.223981	33986.7		0.223981	38598.6
0.226875	15735.8		0.226875	17510.4		0.226875	25705.9		0.226875	29967.5		0.226875	33935.4		0.226875	38525.3
0.229768	15803.1		0.229768	17627.9		0.229768	25707.9		0.229768	29935.2		0.229768	33883.1		0.229768	38451.2
0.232662	15872.6		0.232662	17747.7		0.232662	25712.5		0.232662	29901.8		0.232662	33830.2		0.232662	38376.4
0.235556	15944.7		0.235556	17870.1		0.235556	25718.4		0.235556	29867.3		0.235556	33776.8		0.235556	38301.1
0.23845	16019.2		0.23845	17995		0.23845	25723.9		0.23845	29831.6		0.23845	33722.5		0.23845	38225.3
0.241344	16096.2		0.241344	18122.5		0.241344	25727.9		0.241344	29795		0.241344	33667.4		0.241344	38148.7
0.244238	16175.6		0.244238	18252.6		0.244238	25730.6		0.244238	29757.2		0.244238	33611.5		0.244238	38071.3
0.247132	16257		0.247132	18385.5		0.247132	25731.6		0.247132	29718.1		0.247132	33554.6		0.247132	37993
0.250026	16340.7		0.250026	18521.2		0.250026	25730.2		0.250026	29677.8		0.250026	33497		0.250026	37913.8
0.25292	16426.5		0.25292	18659.7		0.25292	25725.5		0.25292	29636.8		0.25292	33438.4		0.25292	37833.5
0.255814	16514.4		0.255814	18801.2		0.255814	25717.3		0.255814	29595		0.255814	33379		0.255814	37752.1
0.258707	16604.3		0.258707	18945.9		0.258707	25705.3		0.258707	29552.4		0.258707	33318.8		0.258707	37669.6
0.261601	16696.2		0.261601	19093.8		0.261601	25689.6		0.261601	29508.9		0.261601	33257.8		0.261601	37586.1
0.264495	16790.1		0.264495	19245		0.264495	25669.9		0.264495	29464.5		0.264495	33196.1		0.264495	37501.5
0.267389	16886.1		0.267389	19399.7		0.267389	25646.7		0.267389	29419.2		0.267389	33133.4		0.267389	37415.9
0.270283	16984.1		0.270283	19557.8		0.270283	25620.2		0.270283	29373.2		0.270283	33069.9		0.270283	37329.1
0.273177	17084.1		0.273177	19719.5		0.273177	25591		0.273177	29326.4		0.273177	33005.4		0.273177	37241.2
0.276071	17186.1		0.276071	19885		0.276071	25559.5		0.276071	29279		0.276071	32939.8		0.276071	37152.1
0.278965	17290.2		0.278965	20054.1		0.278965	25526.2		0.278965	29230.9		0.278965	32873.3		0.278965	37061.8
0.281859	17396.3		0.281859	20227		0.281859	25491.1		0.281859	29182.2		0.281859	32805.8		0.281859	36970.2
0.284752	17504.6		0.284752	20403.6		0.284752	25454.4		0.284752	29133		0.284752	32737.2		0.284752	36877.4
0.287646	17615.1		0.287646	20584		0.287646	25416.3		0.287646	29083.2		0.287646	32667.5		0.287646	36783.3
0.29054	17727.7		0.29054	20768.1		0.29054	25377.1		0.29054	29032.9		0.29054	32596.8		0.29054	36687.8
0.293434	17842.6		0.293434	20955.9		0.293434	25336.7		0.293434	28982		0.293434	32524.9		0.293434	36590.9
0.296328	17959.9		0.296328	21147.1		0.296328	25295.5		0.296328	28930.4		0.296328	32451.9		0.296328	36492.6
0.299222	18079.5		0.299222	21341.8		0.299222	25253.9		0.299222	28878.2		0.299222	32377.9		0.299222	36392.8
0.302116	18201.5		0.302116	21540		0.302116	25211.9		0.302116	28825.4		0.302116	32302.8		0.302116	36291.7
0.30501	18326		0.30501	21741.6		0.30501	25169.5		0.30501	28771.8		0.30501	32226.6		0.30501	36189.2
0.307904	18453		0.307904	21946.4		0.307904	25126.9		0.307904	28717.6		0.307904	32149.4		0.307904	36085.5
0.310797	18582.7		0.310797	22154.6		0.310797	25083.8		0.310797	28662.5		0.310797	32071		0.310797	35980.5
0.313691	18715		0.313691	22366.1		0.313691	25040.5		0.313691	28606.5		0.313691	31991.5		0.313691	35874.3
0.313691	18715		0.313691	22366.1		0.313691	25040.5		0.313691	28606.5		0.313691	31991.5		0.313691	35874.3
0.316585	18850.1		0.316585	22580.7		0.316585	24996.9		0.316585	28549.6		0.316585	31910.9		0.316585	35766.8
0.319479	18987.8		0.319479	22798.3		0.319479	24953.1		0.319479	28491.7		0.319479	31829.1		0.319479	35658.4
0.322373	19128.2		0.322373	23018.7		0.322373	24909.2		0.322373	28432.8		0.322373	31746.4		0.322373	35549.1
0.325267	19271.3		0.325267	23242.1		0.325267	24865.3		0.325267	28373.1		0.325267	31662.8		0.325267	35439
0.328161	19417		0.328161	23468.5		0.328161	24821.3		0.328161	28312.4		0.328161	31578.3		0.328161	35328
0.331055	19565.3		0.331055	23697.6		0.331055	24777.2		0.331055	28250.7		0.331055	31493		0.331055	35216.3
0.333949	19716		0.333949	23928.9		0.333949	24733		0.333949	28187.9		0.333949	31406.9		0.333949	35104.3
0.336842	19869		0.336842	24162.1		0.336842	24688.7		0.336842	28124.3		0.336842	31320		0.336842	34991.7
0.339736	20024.3		0.339736	24396.8		0.339736	24644.3		0.339736	28059.7		0.339736	31232.6		0.339736	34878.7
0.34263	20182.3		0.34263	24632.7		0.34263	24599.8		0.34263	27994.3		0.34263	31144.6		0.34263	34765.5
0.345524	20342.7		0.345524	24869.3		0.345524	24555.2		0.345524	27928.2		0.345524	31055.9		0.345524	34652.1
0.348418	20505.7		0.348418	25106.3		0.348418	24510.3		0.348418	27861.3		0.348418	30966.7		0.348418	34538.7
0.351312	20671.2		0.351312	25342.9		0.351312	24465.1		0.351312	27793.8		0.351312	30877.3		0.351312	34425.3
0.354206	20839.4		0.354206	25578.8		0.354206	24419.6		0.354206	27725.8		0.354206	30787.5		0.354206	34312
0.3571	21010.3		0.3571	25812.8		0.3571	24373.7		0.3571	27657.1		0.3571	30697.4		0.3571	34198.9
0.359994	21183.7		0.359994	26043.5		0.359994	24327.2		0.359994	27588.1		0.359994	30607.1		0.359994	34086
0.362887	21359.7		0.362887	26270.1		0.362887	24280.3		0.362887	27518.7		0.362887	30516.7		0.362887	33973.5
0.365781	21538.2		0.365781	26492		0.365781	24232.9		0.365781	27448.9		0.365781	30426.4		0.365781	33861.4
0.368675	21719.2		0.368675	26707.8		0.368675	24184.9		0.368675	27378.7		0.368675	30336.1		0.368675	33749.6
0.371569	21902.4		0.371569	26915.8		0.371569	24136.1		0.371569	27308.2		0.371569	30245.9		0.371569	33638.1
0.374463	22087.1		0.374463	27114.5		0.374463	24086.6		0.374463	27237.5		0.374463	30155.7		0.374463	33526.8
0.377357	22272.8		0.377357	27302.2		0.377357	24036.3		0.377357	27166.4		0.377357	30065.5		0.377357	33415.8
0.380251	22459.2		0.380251	27476.4		0.380251	23985.2		0.380251	27095.2		0.380251	29975.7		0.380251	33305.2
0.383145	22645.6		0.383145	27634.6		0.383145	23933.6		0.383145	27023.8		0.383145	29886.1		0.383145	33194.9
0.386039	22831.7		0.386039	27775.2		0.386039	23881.1		0.386039	26952.4		0.386039	29796.8		0.386039	33085
0.388932	23017		0.388932	27895		0.388932	23828		0.388932	26881		0.388932	29707.8		0.388932	32975.5
0.391826	23200.1		0.391826	27991.5		0.391826	23774.3		0.391826	26809.6		0.391826	29619		0.391826	32866.2
0.39472	23379.8		0.39472	28059.8		0.39472	23719.9		0.39472	26738.2		0.39472	29530.4		0.39472	32757.1
0.397614	23554.8		0.397614	28099.9		0.397614	23664.9		0.397614	26666.9		0.397614	29442.1		0.397614	32648.3
0.400508	23723.8		0.400508	28110.9		0.400508	23609.4		0.400508	26595.7		0.400508	29354.1		0.400508	32539.8
0.403402	23884.8		0.403402	28093.5		0.403402	23553.5		0.403402	26524.6		0.403402	29266.4		0.403402	32431.5
0.403402	23884.8		0.403402	28093.5		0.403402	23553.5		0.403402	26524.6		0.403402	29266.4		0.403402	32431.5
0.406296	24036		0.406296	28052.9		0.406296	23497.1		0.406296	26453.7		0.406296	29178.9		0.406296	32323.4
0.40919	24175.2		0.40919	27989		0.40919	23440.4		0.40919	26382.9		0.40919	29091.7		0.40919	32215.6
0.412084	24299.5		0.412084	27903.5		0.412084	23383.4		0.412084	26312.4		0.412084	29004.8		0.412084	32108
0.414977	24405.8		0.414977	27793.5		0.414977	23326.1		0.414977	26242		0.414977	28918		0.414977	32000.6
0.417871	24493.1		0.417871	27666.8		0.417871	23268.3		0.417871	26171.8		0.417871	28831.5		0.417871	31893.5
0.420765	24555.6		0.420765	27521.1		0.420765	23210.4		0.420765	26101.8		0.420765	28745.2		0.420765	31786.6
0.423659	24595.6		0.423659	27360		0.423659	23152.4		0.423659	26032		0.423659	28659.1		0.423659	31680
0.426553	24612.4		0.426553	27187.3		0.426553	23094.1		0.426553	25962.5		0.426553	28573.2		0.426553	31573.7
0.429447	24605.2		0.429447	27001.3		0.429447	23035.6		0.429447	25893.1		0.429447	28487.4		0.429447	31467.7
0.432341	24582		0.432341	26809.8		0.432341	22977		0.432341	25824		0.432341	28401.9		0.432341	31362.1
0.435235	24542.8		0.435235	26609.3		0.435235	22918.4		0.435235	25755.1		0.435235	28316.5		0.435235	31256.8
0.438129	24484.4		0.438129	26403.3		0.438129	22859.6		0.438129	25686.3		0.438129	28231.2		0.438129	31151.9
0.441023	24412.3		0.441023	26195.9		0.441023	22800.9		0.441023	25617.8		0.441023	28146.2		0.441023	31047.4
0.443916	24322.3		0.443916	25984.8		0.443916	22742.2		0.443916	25549.4		0.443916	28061.3		0.443916	30943.4
0.44681	24220.4		0.44681	25774.9		0.44681	22683.5		0.44681	25481.3		0.44681	27976.8		0.44681	30839.9
0.449704	24107		0.449704	25565.7		0.449704	22625		0.449704	25413.4		0.449704	27892.5		0.449704	30736.9
0.452598	23983.9		0.452598	25356.8		0.452598	22566.7		0.452598	25345.8		0.452598	27808.5		0.452598	30634.5
0.455492	23856.1		0.455492	25151.7		0.455492	22508.4		0.455492	25278.3		0.455492	27724.8		0.455492	30532.6
0.458386	23720.8		0.458386	24950.7		0.458386	22450.3		0.458386	25211.1		0.458386	27641.5		0.458386	30431.3
0.46128	23582.7		0.46128	24752.5		0.46128	22392.3		0.46128	25144		0.46128	27558.3		0.46128	30330.5
0.464174	23442		0.464174	24560.5		0.464174	22334.5		0.464174	25077.1		0.464174	27475.6		0.464174	30230.2
0.467068	23298.6		0.467068	24373.9		0.467068	22276.9		0.467068	25010.4		0.467068	27393.3		0.467068	30130.6
0.469961	23156.4		0.469961	24190.8		0.469961	22219.6		0.469961	24944.1		0.469961	27311.4		0.469961	30031.7
0.472855	23012.9		0.472855	24016.4		0.472855	22162.5		0.472855	24878.1		0.472855	27230.1		0.472855	29933.5
0.475749	22871.2		0.475749	23846.1		0.475749	22105.7		0.475749	24812.2		0.475749	27149.1		0.475749	29836
0.478643	22734.6		0.478643	23683.4		0.478643	22049		0.478643	24746.7		0.478643	27068.7		0.478643	29739.1
0.481537	22596		0.481537	23526.4		0.481537	21992.6		0.481537	24681.3		0.481537	26988.7		0.481537	29642.8
0.484431	22465.7		0.484431	23375.9		0.484431	21936.4		0.484431	24616.3		0.484431	26909.2		0.484431	29547.3
0.487325	22335.5		0.487325	23233.4		0.487325	21880.4		0.487325	24551.7		0.487325	26830.2		0.487325	29452.4
0.490219	22209.9		0.490219	23094.5		0.490219	21824.7		0.490219	24487.4		0.490219	26751.8		0.490219	29358.3
0.493113	22091.2		0.493113	22965.3		0.493113	21769.3		0.493113	24423.4		0.493113	26673.9		0.493113	29264.9
0.496006	21973.3		0.496006	22839.8		0.496006	21714		0.496006	24359.8		0.496006	26596.5		0.496006	29172.1
0.4989	21864.6		0.4989	22721.2		0.4989	21659		0.4989	24296.4		0.4989	26519.7		0.4989	29080
0.501794	21758		0.501794	22610.1		0.501794	21604.1		0.501794	24233.5		0.501794	26443.3		0.501794	28988.4
0.504688	21655.6		0.504688	22501.2		0.504688	21549.5		0.504688	24170.9		0.504688	26367.4		0.504688	28897.5
0.507582	21561.5		0.507582	22401.7		0.507582	21495.1		0.507582	24108.7		0.507582	26292.1		0.507582	28807.2
0.510476	21468.2		0.510476	22304.9		0.510476	21440.9		0.510476	24046.9		0.510476	26217.4		0.510476	28717.5
0.51337	21380.8		0.51337	22213.6		0.51337	21386.9		0.51337	23985.5		0.51337	26143.1		0.51337	28628.4
0.516264	21300		0.516264	22129.5		0.516264	21333.1		0.516264	23924.4		0.516264	26069.3		0.516264	28539.7
0.519158	21220.8		0.519158	22047.4		0.519158	21279.4		0.519158	23863.6		0.519158	25995.7		0.519158	28451.3
0.522051	21148.4		0.522051	21970.7		0.522051	21225.8		0.522051	23803.1		0.522051	25922.6		0.522051	28363.3
0.524945	21079.3		0.524945	21898.7		0.524945	21172.4		0.524945	23742.9		0.524945	25849.9		0.524945	28275.8
0.524945	21079.3		0.524945	21898.7		0.524945	21172.4		0.524945	23742.9		0.524945	25849.9		0.524945	28275.8
0.527839	21012.8		0.527839	21829.5		0.527839	21119.3		0.527839	23683.1		0.527839	25777.6		0.527839	28188.7
0.530733	20952.6		0.530733	21764.4		0.530733	21066.2		0.530733	23623.6		0.530733	25705.5		0.530733	28101.9
0.533627	20894.7		0.533627	21702.8		0.533627	21013.3		0.533627	23564.3		0.533627	25633.8		0.533627	28015.3
0.536521	20839.5		0.536521	21644.2		0.536521	20960.6		0.536521	23505.3		0.536521	25562.3		0.536521	27929.1
0.539415	20788.7		0.539415	21588.6		0.539415	20907.9		0.539415	23446.4		0.539415	25491.1		0.539415	27843
0.542309	20740.8		0.542309	21536		0.542309	20855.4		0.542309	23387.8		0.542309	25420		0.542309	27757.3
0.545203	20695.5		0.545203	21485.9		0.545203	20802.9		0.545203	23329.3		0.545203	25349.2		0.545203	27671.7
0.548096	20653.3		0.548096	21438.3		0.548096	20750.5		0.548096	23271		0.548096	25278.5		0.548096	27586.4
0.55099	20613.7		0.55099	21393.3		0.55099	20698.3		0.55099	23212.8		0.55099	25207.9		0.55099	27501.3
0.553884	20576.6		0.553884	21350		0.553884	20646		0.553884	23154.7		0.553884	25137.5		0.553884	27416.3
0.556778	20542.1		0.556778	21308.9		0.556778	20593.8		0.556778	23096.8		0.556778	25067.1		0.556778	27331.5
0.559672	20509.6		0.559672	21269.8		0.559672	20541.7		0.559672	23038.9		0.559672	24996.8		0.559672	27246.9
0.562566	20479.2		0.562566	21232.2		0.562566	20489.6		0.562566	22981		0.562566	24926.6		0.562566	27162.4
0.56546	20450.7		0.56546	21196.4		0.56546	20437.6		0.56546	22923.2		0.56546	24856.5		0.56546	27078.1
0.568354	20423.8		0.568354	21162.1		0.568354	20385.6		0.568354	22865.4		0.568354	24786.4		0.568354	26993.9
0.571248	20398.7		0.571248	21129		0.571248	20333.6		0.571248	22807.6		0.571248	24716.3		0.571248	26909.8
0.574142	20374.9		0.574142	21097.3		0.574142	20281.7		0.574142	22749.8		0.574142	24646.2		0.574142	26825.9
0.577035	20352.4		0.577035	21066.4		0.577035	20229.8		0.577035	22692		0.577035	24576.2		0.577035	26742.1
0.579929	20331.2		0.579929	21036.7		0.579929	20177.9		0.579929	22634.2		0.579929	24506.2		0.579929	26658.4
0.582823	20311		0.582823	21007.7		0.582823	20126		0.582823	22576.3		0.582823	24436.2		0.582823	26574.7
0.585717	20291.8		0.585717	20979.5		0.585717	20074.2		0.585717	22518.4		0.585717	24366.2		0.585717	26491.2
0.588611	20273.5		0.588611	20952		0.588611	20022.4		0.588611	22460.4		0.588611	24296.2		0.588611	26407.7
0.591505	20256.1		0.591505	20924.9		0.591505	19970.7		0.591505	22402.5		0.591505	24226.2		0.591505	26324.4
0.594399	20239.6		0.594399	20898.6		0.594399	19919.2		0.594399	22344.6		0.594399	24156.4		0.594399	26241.1
0.597293	20223.8		0.597293	20872.9		0.597293	19867.7		0.597293	22286.7		0.597293	24086.6		0.597293	26158
0.600186	20208.8		0.600186	20847.6		0.600186	19816.4		0.600186	22228.9		0.600186	24016.9		0.600186	26075
0.60308	20194.4		0.60308	20822.9		0.60308	19765.2		0.60308	22171.2		0.60308	23947.2		0.60308	25992
0.605974	20180.7		0.605974	20798.5		0.605974	19714.1		0.605974	22113.4		0.605974	23877.5		0.605974	25909.1
0.608868	20167.6		0.608868	20774.6		0.608868	19663.2		0.608868	22055.8		0.608868	23808		0.608868	25826.3
0.611762	20155.3		0.611762	20751.2		0.611762	19612.7		0.611762	21998.4		0.611762	23738.7		0.611762	25743.7
0.614656	20143.8		0.614656	20728.5		0.614656	19562.5		0.614656	21941.3		0.614656	23669.6		0.614656	25661.3
0.61755	20133.1		0.61755	20706.5		0.61755	19512.7		0.61755	21884.4		0.61755	23600.8		0.61755	25579.1
0.620444	20123.1		0.620444	20685.2		0.620444	19463.2		0.620444	21827.9		0.620444	23532.2		0.620444	25497.2
0.623338	20114		0.623338	20664.6		0.623338	19414.3		0.623338	21771.6		0.623338	23463.9		0.623338	25415.5
0.626231	20105.7		0.626231	20645		0.626231	19365.8		0.626231	21715.8		0.626231	23396		0.626231	25334.1
0.629125	20098.3		0.629125	20626.3		0.629125	19318		0.629125	21660.5		0.629125	23328.5		0.629125	25253.1
0.632019	20091.8		0.632019	20608.6		0.632019	19270.9		0.632019	21605.9		0.632019	23261.5		0.632019	25172.5
0.634913	20086.5		0.634913	20591.9		0.634913	19224.7		0.634913	21551.9		0.634913	23195.2		0.634913	25092.6
0.637807	20082.4		0.637807	20576.5		0.637807	19179.6		0.637807	21498.9		0.637807	23129.6		0.637807	25013.4
0.640701	20079.7		0.640701	20562.4		0.640701	19135.6		0.640701	21447		0.640701	23065.1		0.640701	24935
0.643595	20078.7		0.643595	20549.8		0.643595	19092.9		0.643595	21396.2		0.643595	23001.7		0.643595	24857.8
0.643595	20078.7		0.643595	20549.8		0.643595	19092.9		0.643595	21396.2		0.643595	23001.7		0.643595	24857.8
0.646489	20079.3		0.646489	20538.9		0.646489	19051.7		0.646489	21346.8		0.646489	22939.6		0.646489	24781.7
0.649383	20081.8		0.649383	20529.9		0.649383	19012		0.649383	21298.8		0.649383	22878.9		0.649383	24706.8
0.652277	20086.2		0.652277	20523		0.652277	18974.1		0.652277	21252.6		0.652277	22819.7		0.652277	24633.5
0.65517	20092.7		0.65517	20518.2		0.65517	18937.8		0.65517	21208.1		0.65517	22762.3		0.65517	24561.7
0.658064	20101.1		0.658064	20515.6		0.658064	18903.5		0.658064	21165.3		0.658064	22706.5		0.658064	24491.6
0.660958	20111.5		0.660958	20515.1		0.660958	18870.7		0.660958	21124.3		0.660958	22652.6		0.660958	24423.2
0.663852	20123.6		0.663852	20516.3		0.663852	18839.7		0.663852	21084.9		0.663852	22600.3		0.663852	24356.5
0.666746	20137.9		0.666746	20519.9		0.666746	18810.2		0.666746	21047.3		0.666746	22549.8		0.666746	24291.4
0.66964	20154		0.66964	20525.2		0.66964	18782.2		0.66964	21011.5		0.66964	22501.2		0.66964	24228.4
0.672534	20171.9		0.672534	20532.4		0.672534	18755.8		0.672534	20977.2		0.672534	22454.3		0.672534	24167.3
0.675428	20191.5		0.675428	20541.3		0.675428	18731.5		0.675428	20944.6		0.675428	22409.1		0.675428	24108
0.678322	20212.3		0.678322	20551.5		0.678322	18709.8		0.678322	20913.9		0.678322	22365.4		0.678322	24050.8
0.681215	20234.8		0.681215	20563.5		0.681215	18689.4		0.681215	20886.5		0.681215	22323.8		0.681215	23995.5
0.684109	20259.7		0.684109	20578.3		0.684109	18671.8		0.684109	20860.3		0.684109	22285.8		0.684109	23943
0.687003	20286.3		0.687003	20594.5		0.687003	18655.2		0.687003	20836.9		0.687003	22249.2		0.687003	23894
0.689897	20314		0.689897	20612.9		0.689897	18640.7		0.689897	20814.9		0.689897	22215.8		0.689897	23847.5
0.692791	20343.6		0.692791	20632		0.692791	18627.8		0.692791	20795.3		0.692791	22184		0.692791	23805.7
0.695685	20373.1		0.695685	20653.1		0.695685	18616.7		0.695685	20777.2		0.695685	22155.2		0.695685	23765.7
0.698579	20405.7		0.698579	20674.7		0.698579	18607		0.698579	20761.3		0.698579	22128.3		0.698579	23729.6
0.701473	20437.8		0.701473	20697.8		0.701473	18599.1		0.701473	20746.9		0.701473	22104.3		0.701473	23696.2
0.704367	20470.8		0.704367	20721.4		0.704367	18592.3		0.704367	20734.3		0.704367	22082.2		0.704367	23666.4
0.70726	20504		0.70726	20745.5		0.70726	18586.8		0.70726	20722.9		0.70726	22062.5		0.70726	23639
0.710154	20537.1		0.710154	20769.7		0.710154	18581.9		0.710154	20713		0.710154	22044.5		0.710154	23614.5
0.713048	20570.1		0.713048	20793.2		0.713048	18577.9		0.713048	20703.7		0.713048	22028.4		0.713048	23591.9
0.715942	20602		0.715942	20816.6		0.715942	18574		0.715942	20695.2		0.715942	22013.4		0.715942	23570.8
0.715942	20602		0.715942	20816.6		0.715942	18574		0.715942	20695.2		0.715942	22013.4		0.715942	23570.8
0.718836	20633.5		0.718836	20838.6		0.718836	18570		0.718836	20686.9		0.718836	21999.1		0.718836	23551
0.72173	20663.1		0.72173	20859.6		0.72173	18565.6		0.72173	20678		0.72173	21985.4		0.72173	23531.2
0.724624	20691.1		0.724624	20878.1		0.724624	18559.9		0.724624	20668.8		0.724624	21971		0.724624	23511.2
0.727518	20715.7		0.727518	20894.7		0.727518	18553.1		0.727518	20657.6		0.727518	21955.9		0.727518	23489.3
0.730412	20738.1		0.730412	20907.4		0.730412	18543.9		0.730412	20645.1		0.730412	21938.5		0.730412	23465.7
0.733305	20756.3		0.733305	20917.3		0.733305	18532.6		0.733305	20629.3		0.733305	21919.1		0.733305	23437.9
0.736199	20770.8		0.736199	20923		0.736199	18517.7		0.736199	20611		0.736199	21895.5		0.736199	23406.7
0.739093	20780.5		0.739093	20924.1		0.739093	18500		0.739093	20588		0.739093	21868.5		0.739093	23369.5
0.741987	20785		0.741987	20920.2		0.741987	18477.6		0.741987	20561.9		0.741987	21835.3		0.741987	23327
0.744881	20783.9		0.744881	20911		0.744881	18452.1		0.744881	20529.9		0.744881	21798		0.744881	23276.3
0.747775	20777.1		0.747775	20896.4		0.747775	18421.5		0.747775	20493.8		0.747775	21753.9		0.747775	23219.9
0.750669	20764.4		0.750669	20876.4		0.750669	18387.1		0.750669	20452.8		0.750669	21704.1		0.750669	23155.9
0.753563	20746.5		0.753563	20851.5		0.753563	18349		0.753563	20406.2		0.753563	21648.3		0.753563	23084.4
0.756457	20723.3		0.756457	20821.7		0.756457	18306.9		0.756457	20356.3		0.756457	21586.5		0.756457	23007.3
0.75935	20696.1		0.75935	20788.4		0.75935	18262.9		0.75935	20302.9		0.75935	21520.4		0.75935	22924.9
0.762244	20665.4		0.762244	20751.9		0.762244	18217.4		0.762244	20247.2		0.762244	21450.8		0.762244	22840
0.765138	20632.7		0.765138	20713.6		0.765138	18171.8		0.765138	20190.6		0.765138	21379.1		0.765138	22754.2
0.768032	20600		0.768032	20675.7		0.768032	18127.2		0.768032	20134.4		0.768032	21307.1		0.768032	22670
0.770926	20569.2		0.770926	20639.6		0.770926	18084.6		0.770926	20079.8		0.770926	21236.1		0.770926	22589.1
0.77382	20543.5		0.77382	20608.3		0.77382	18046.2		0.77382	20029.2		0.77382	21169.4		0.77382	22515
0.776714	20524		0.776714	20582.4		0.776714	18012.8		0.776714	19983.6		0.776714	21109.1		0.776714	22449.7
0.779608	20512.9		0.779608	20564.4		0.779608	17988		0.779608	19946.4		0.779608	21058.4		0.779608	22396.3
0.782502	20517.4		0.782502	20561.1		0.782502	17976.1		0.782502	19923.7		0.782502	21023.8		0.782502	22359.6
0.785396	20544.6		0.785396	20579.5		0.785396	17979.7		0.785396	19918.5		0.785396	21010.3		0.785396	22344.9
0.788289	20597.6		0.788289	20622.9		0.788289	18004.4		0.788289	19936.4		0.788289	21023.9		0.788289	22358.5
0.791183	20681.2		0.791183	20696.2		0.791183	18054.3		0.791183	19983.1		0.791183	21070.5		0.791183	22405.2
0.794077	20797.5		0.794077	20802.8		0.794077	18131.6		0.794077	20061.2		0.794077	21153.1		0.794077	22488.7
0.796971	20945.8		0.796971	20942.3		0.796971	18236.7		0.796971	20171.6		0.796971	21272.1		0.796971	22609.8
0.799865	21124.2		0.799865	21113		0.799865	18369.2		0.799865	20314		0.799865	21426.7		0.799865	22767.9
0.799865	21124.2		0.799865	21113		0.799865	18369.2		0.799865	20314		0.799865	21426.7		0.799865	22767.9
0.802759	21329.4		0.802759	21311.8		0.802759	18526.6		0.802759	20486		0.802759	21614		0.802759	22960.5
0.805653	21556.5		0.805653	21534.2		0.805653	18705.6		0.805653	20684		0.805653	21829.6		0.805653	23183.4
0.808547	21799.7		0.808547	21774.4		0.808547	18901.6		0.808547	20902.8		0.808547	22068.1		0.808547	23431
0.811441	22050.8		0.811441	22024.2		0.811441	19108.5		0.811441	21135.2		0.811441	22321.3		0.811441	23694.7
0.814334	22300.9		0.814334	22274.8		0.814334	19318.7		0.814334	21372.7		0.814334	22579.3		0.814334	23964.2
0.817228	22539.4		0.817228	22515.3		0.817228	19523.9		0.817228	21604.1		0.817228	22830.3		0.817228	24226.8
0.820122	22756.7		0.820122	22735.8		0.820122	19715		0.820122	21820.2		0.820122	23064		0.820122	24471.7
0.823016	22946.8		0.823016	22930		0.823016	19887.1		0.823016	22012.3		0.823016	23270.3		0.823016	24688.1
0.82591	23106.8		0.82591	23094.6		0.82591	20034.6		0.82591	22177.9		0.82591	23446.4		0.82591	24873.1
0.828804	23240		0.828804	23232.3		0.828804	20160.6		0.828804	22313.4		0.828804	23588.3		0.828804	25023
0.831698	23365.2		0.831698	23360.1		0.831698	20279.8		0.831698	22438.9		0.831698	23717.2		0.831698	25160.2
0.834592	23546.2		0.834592	23537		0.834592	20434.4		0.834592	22607		0.834592	23890.1		0.834592	25344.8
0.837486	23865.2		0.837486	23850.5		0.837486	20699		0.837486	22893		0.837486	24189.8		0.837486	25667.4
0.840379	24348.1		0.840379	24336.8		0.840379	21111		0.840379	23344.4		0.840379	24670.9		0.840379	26188.6
0.843273	24966.2		0.843273	24967.8		0.843273	21651.9		0.843273	23940		0.843273	25313.8		0.843273	26887.8
0.846167	25675.7		0.846167	25700.5		0.846167	22289.6		0.846167	24643.8		0.846167	26077.3		0.846167	27718.9
0.849061	26438.7		0.849061	26501.5		0.849061	23002.6		0.849061	25423.6		0.849061	26919.7		0.849061	28633.5
0.851955	27252.8		0.851955	27369.1		0.851955	23801.8		0.851955	26291		0.851955	27849.6		0.851955	29634.7
0.854849	28044.3		0.854849	28215.6		0.854849	24608.5		0.854849	27173.7		0.854849	28806.9		0.854849	30666.3
0.857743	28696.8		0.857743	28918		0.857743	25304.3		0.857743	27939.8		0.857743	29650.2		0.857743	31579.6
0.860637	29218.7		0.860637	29486.4		0.860637	25898.7		0.860637	28587.2		0.860637	30360.1		0.860637	32343.8
0.863531	29955.9		0.863531	30255.3		0.863531	26650.6		0.863531	29410.3		0.863531	31258.2		0.863531	33304.1
0.866424	31359.3		0.866424	31707.3		0.866424	27970.9		0.866424	30872.2		0.866424	32850.3		0.866424	35013.3
0.869318	33245.9		0.869318	33691		0.869318	29776.7		0.869318	32874.5		0.869318	35030.5		0.869318	37363
0.872212	35018		0.872212	35589.6		0.872212	31554		0.872212	34839.1		0.872212	37171.8		0.872212	39674.5
0.875106	36235.4		0.875106	36932.3		0.875106	32866.3		0.875106	36280.1		0.875106	38747.6		0.875106	41376.1
0.878	36663.1		0.878	37417.7		0.878	33359.4		0.878	36817.6		0.878	39337.9		0.878	42013.2
