# Supplementary material for: Assessment of the impact of using Ammonia-Hydrogen fuel blend in a diffusion combustor: A numerical approach
Source: Research Square preprint supplement (doi:10.21203/rs.3.rs-7960312/v1), 2025-11-25
Supplement: Supplementary file 10 [file e8601156bf8266f9cc0d112b.xlsx]

## Sheet: Axial temp distribution
SN 0			SN 0.2			SN 0.4			SN 0.6			SN 0.8			SN 1
Axial distance	temperature		Axial distance	temperature		Axial distance	temperature		Axial distance	temperature		Axial distance	temperature		Axial distance	temperature
0.00115113	290.017		0.00115113	290.143		0.00115113	290.284		0.00115113	290.035		0.00115113	289.581		0.00115113	289.593
0.00404502	294.059		0.00404502	294.178		0.00404502	294.322		0.00404502	294.156		0.00404502	293.606		0.00404502	293.766
0.00693891	299.224		0.00693891	299.338		0.00693891	299.324		0.00693891	299.095		0.00693891	298.625		0.00693891	298.965
0.0098328	304.876		0.0098328	305.14		0.0098328	304.935		0.0098328	304.884		0.0098328	304.479		0.0098328	305.066
0.0127267	310.974		0.0127267	311.349		0.0127267	311.098		0.0127267	311.498		0.0127267	311.145		0.0127267	312.072
0.0156206	317.528		0.0156206	317.879		0.0156206	317.661		0.0156206	318.762		0.0156206	318.611		0.0156206	319.937
0.0185145	324.278		0.0185145	324.621		0.0185145	324.467		0.0185145	326.513		0.0185145	326.801		0.0185145	328.224
0.0214084	331.104		0.0214084	331.422		0.0214084	331.384		0.0214084	334.651		0.0214084	335.524		0.0214084	336.709
0.0243023	337.862		0.0243023	338.182		0.0243023	338.324		0.0243023	342.977		0.0243023	344.352		0.0243023	345.221
0.0271961	344.446		0.0271961	344.822		0.0271961	345.295		0.0271961	351.148		0.0271961	352.912		0.0271961	353.468
0.03009	350.86		0.03009	351.292		0.03009	352.218		0.03009	359.192		0.03009	360.997		0.03009	361.262
0.0329839	357.098		0.0329839	357.557		0.0329839	358.95		0.0329839	367.163		0.0329839	368.611		0.0329839	368.483
0.0358778	363.122		0.0358778	363.464		0.0358778	365.428		0.0358778	374.777		0.0358778	375.728		0.0358778	375.071
0.0387717	368.892		0.0387717	369.175		0.0387717	371.537		0.0387717	381.806		0.0387717	382.18		0.0387717	381.011
0.0416656	374.443		0.0416656	374.819		0.0416656	377.296		0.0416656	388.358		0.0416656	388.046		0.0416656	386.422
0.0445595	379.447		0.0445595	379.876		0.0445595	382.934		0.0445595	394.588		0.0445595	393.34		0.0445595	391.362
0.0474534	384.195		0.0474534	384.649		0.0474534	388.435		0.0474534	400.401		0.0474534	398.342		0.0474534	396.086
0.0503473	388.909		0.0503473	389.549		0.0503473	393.695		0.0503473	405.801		0.0503473	403.33		0.0503473	400.757
0.0532412	393.578		0.0532412	394.303		0.0532412	398.737		0.0532412	410.889		0.0532412	408.06		0.0532412	405.116
0.056135	398.247		0.056135	398.869		0.056135	403.58		0.056135	415.803		0.056135	412.457		0.056135	409.262
0.0590289	402.633		0.0590289	403.254		0.0590289	408.277		0.0590289	420.837		0.0590289	416.713		0.0590289	413.33
0.0619228	406.853		0.0619228	407.473		0.0619228	412.817		0.0619228	426.379		0.0619228	421.106		0.0619228	417.244
0.0648167	410.936		0.0648167	411.54		0.0648167	417.227		0.0648167	433.059		0.0648167	426.19		0.0648167	421.088
0.0677106	414.898		0.0677106	415.451		0.0677106	421.399		0.0677106	442.162		0.0677106	432.945		0.0677106	424.884
0.0706045	418.752		0.0706045	419.233		0.0706045	425.543		0.0706045	456.584		0.0706045	442.801		0.0706045	428.838
0.0734984	422.508		0.0734984	422.94		0.0734984	429.69		0.0734984	481.666		0.0734984	458.844		0.0734984	433.256
0.0763923	426.171		0.0763923	426.578		0.0763923	433.869		0.0763923	526.313		0.0763923	486.72		0.0763923	438.557
0.0792862	429.748		0.0792862	430.149		0.0792862	438.285		0.0792862	604.559		0.0792862	535.756		0.0792862	446.069
0.0821801	433.244		0.0821801	433.604		0.0821801	442.575		0.0821801	729.561		0.0821801	619.731		0.0821801	457.844
0.085074	436.656		0.085074	436.97		0.085074	446.936		0.085074	898.185		0.085074	749.244		0.085074	477.401
0.085074	436.656		0.085074	436.97		0.085074	446.936		0.085074	898.185		0.085074	749.244		0.085074	477.401
0.0879678	439.998		0.0879678	440.314		0.0879678	451.439		0.0879678	1083.06		0.0879678	917.838		0.0879678	510.6
0.0908617	443.274		0.0908617	443.628		0.0908617	456.095		0.0908617	1241.89		0.0908617	1097.89		0.0908617	566.15
0.0937556	446.51		0.0937556	446.906		0.0937556	460.947		0.0937556	1341.65		0.0937556	1249.32		0.0937556	654.294
0.0966495	449.729		0.0966495	450.141		0.0966495	466.049		0.0966495	1374.96		0.0966495	1341.51		0.0966495	779.426
0.0995434	452.919		0.0995434	453.332		0.0995434	471.469		0.0995434	1362.36		0.0995434	1368.29		0.0995434	933.708
0.102437	456.081		0.102437	456.499		0.102437	477.509		0.102437	1332.66		0.102437	1352.52		0.102437	1096.96
0.105331	459.222		0.105331	459.672		0.105331	484.924		0.105331	1300.73		0.105331	1323.9		0.105331	1240.78
0.108225	462.352		0.108225	462.841		0.108225	494.892		0.108225	1271.13		0.108225	1295.62		0.108225	1340.07
0.111119	465.457		0.111119	466.023		0.111119	510.048		0.111119	1245.22		0.111119	1271.44		0.111119	1384.46
0.114013	468.554		0.114013	469.207		0.114013	535.01		0.114013	1223.42		0.114013	1251.48		0.114013	1385.84
0.116907	471.663		0.116907	472.388		0.116907	576.757		0.116907	1205		0.116907	1235.35		0.116907	1367.12
0.119801	474.786		0.119801	475.6		0.119801	643.057		0.119801	1189.32		0.119801	1222.51		0.119801	1343.52
0.122695	477.924		0.122695	478.839		0.122695	739.214		0.122695	1176.19		0.122695	1212.33		0.122695	1321.5
0.125588	481.068		0.125588	482.09		0.125588	863.414		0.125588	1165.37		0.125588	1204.21		0.125588	1302.81
0.128482	484.226		0.128482	485.347		0.128482	1005.91		0.128482	1156.53		0.128482	1197.86		0.128482	1287.49
0.131376	487.397		0.131376	488.645		0.131376	1151.56		0.131376	1149.37		0.131376	1193.02		0.131376	1275.25
0.13427	490.58		0.13427	492.003		0.13427	1282.62		0.13427	1143.65		0.13427	1189.33		0.13427	1265.49
0.137164	493.789		0.137164	495.429		0.137164	1383.52		0.137164	1139.09		0.137164	1186.49		0.137164	1257.78
0.140058	497.035		0.140058	498.924		0.140058	1445.77		0.140058	1135.43		0.140058	1184.28		0.140058	1251.82
0.142952	500.321		0.142952	502.468		0.142952	1467.73		0.142952	1132.54		0.142952	1182.55		0.142952	1247.16
0.145846	503.662		0.145846	506.077		0.145846	1456.64		0.145846	1130.29		0.145846	1181.19		0.145846	1243.48
0.14874	507.052		0.14874	509.768		0.14874	1426.56		0.14874	1128.54		0.14874	1180.13		0.14874	1240.6
0.151633	510.479		0.151633	513.531		0.151633	1388.58		0.151633	1127.18		0.151633	1179.28		0.151633	1238.38
0.154527	513.942		0.154527	517.38		0.154527	1348.94		0.154527	1126.11		0.154527	1178.58		0.154527	1236.64
0.157421	517.465		0.157421	521.328		0.157421	1310.87		0.157421	1125.26		0.157421	1177.99		0.157421	1235.26
0.160315	521.059		0.160315	525.385		0.160315	1275.87		0.160315	1124.57		0.160315	1177.47		0.160315	1234.13
0.163209	524.727		0.163209	529.555		0.163209	1244.88		0.163209	1124		0.163209	1177		0.163209	1233.18
0.166103	528.462		0.166103	533.839		0.166103	1218.23		0.166103	1123.51		0.166103	1176.56		0.166103	1232.36
0.166103	528.462		0.166103	533.839		0.166103	1218.23		0.166103	1123.51		0.166103	1176.56		0.166103	1232.36
0.168997	532.273		0.168997	538.242		0.168997	1195.26		0.168997	1123.08		0.168997	1176.15		0.168997	1231.64
0.171891	536.176		0.171891	542.764		0.171891	1175.38		0.171891	1122.69		0.171891	1175.75		0.171891	1230.99
0.174785	540.164		0.174785	547.411		0.174785	1158.45		0.174785	1122.34		0.174785	1175.36		0.174785	1230.39
0.177678	544.24		0.177678	552.204		0.177678	1144.28		0.177678	1122.01		0.177678	1174.98		0.177678	1229.82
0.180572	548.4		0.180572	557.14		0.180572	1132.47		0.180572	1121.69		0.180572	1174.61		0.180572	1229.28
0.183466	552.653		0.183466	562.218		0.183466	1122.59		0.183466	1121.37		0.183466	1174.23		0.183466	1228.75
0.18636	557		0.18636	567.446		0.18636	1114.39		0.18636	1121.07		0.18636	1173.85		0.18636	1228.23
0.189254	561.445		0.189254	572.841		0.189254	1107.65		0.189254	1120.76		0.189254	1173.47		0.189254	1227.71
0.192148	565.988		0.192148	578.423		0.192148	1102.13		0.192148	1120.46		0.192148	1173.09		0.192148	1227.2
0.195042	570.632		0.195042	584.165		0.195042	1097.62		0.195042	1120.15		0.195042	1172.7		0.195042	1226.68
0.197936	575.378		0.197936	590.078		0.197936	1093.95		0.197936	1119.84		0.197936	1172.31		0.197936	1226.16
0.20083	580.231		0.20083	596.169		0.20083	1091		0.20083	1119.53		0.20083	1171.91		0.20083	1225.64
0.203723	585.211		0.203723	602.441		0.203723	1088.62		0.203723	1119.22		0.203723	1171.51		0.203723	1225.12
0.206617	590.311		0.206617	608.92		0.206617	1086.72		0.206617	1118.9		0.206617	1171.11		0.206617	1224.59
0.209511	595.515		0.209511	615.561		0.209511	1085.19		0.209511	1118.57		0.209511	1170.69		0.209511	1224.05
0.212405	600.815		0.212405	622.372		0.212405	1083.96		0.212405	1118.25		0.212405	1170.28		0.212405	1223.51
0.215299	606.235		0.215299	629.375		0.215299	1082.96		0.215299	1117.92		0.215299	1169.85		0.215299	1222.96
0.215299	606.235		0.215299	629.375		0.215299	1082.96		0.215299	1117.92		0.215299	1169.85		0.215299	1222.96
0.218193	611.783		0.218193	636.568		0.218193	1082.14		0.218193	1117.58		0.218193	1169.42		0.218193	1222.4
0.221087	617.425		0.221087	643.928		0.221087	1081.45		0.221087	1117.24		0.221087	1168.99		0.221087	1221.84
0.223981	623.166		0.223981	651.447		0.223981	1080.88		0.223981	1116.9		0.223981	1168.55		0.223981	1221.27
0.226875	629.041		0.226875	659.14		0.226875	1080.38		0.226875	1116.55		0.226875	1168.11		0.226875	1220.69
0.229768	635.017		0.229768	667.01		0.229768	1079.94		0.229768	1116.2		0.229768	1167.66		0.229768	1220.11
0.232662	641.089		0.232662	675.035		0.232662	1079.55		0.232662	1115.85		0.232662	1167.21		0.232662	1219.52
0.235556	647.275		0.235556	683.154		0.235556	1079.18		0.235556	1115.49		0.235556	1166.75		0.235556	1218.93
0.23845	653.545		0.23845	691.381		0.23845	1078.84		0.23845	1115.13		0.23845	1166.29		0.23845	1218.33
0.241344	659.92		0.241344	699.768		0.241344	1078.51		0.241344	1114.76		0.241344	1165.82		0.241344	1217.72
0.244238	666.398		0.244238	708.328		0.244238	1078.2		0.244238	1114.39		0.244238	1165.34		0.244238	1217.11
0.247132	672.894		0.247132	717.078		0.247132	1077.89		0.247132	1114.02		0.247132	1164.87		0.247132	1216.49
0.250026	679.432		0.250026	726.013		0.250026	1077.58		0.250026	1113.65		0.250026	1164.39		0.250026	1215.86
0.25292	686.056		0.25292	735.115		0.25292	1077.28		0.25292	1113.27		0.25292	1163.9		0.25292	1215.23
0.255814	692.752		0.255814	744.352		0.255814	1076.97		0.255814	1112.88		0.255814	1163.41		0.255814	1214.59
0.258707	699.563		0.258707	753.71		0.258707	1076.67		0.258707	1112.5		0.258707	1162.91		0.258707	1213.95
0.261601	706.494		0.261601	763.211		0.261601	1076.36		0.261601	1112.11		0.261601	1162.41		0.261601	1213.3
0.264495	713.505		0.264495	772.868		0.264495	1076.05		0.264495	1111.71		0.264495	1161.91		0.264495	1212.65
0.267389	720.612		0.267389	782.687		0.267389	1075.74		0.267389	1111.32		0.267389	1161.4		0.267389	1211.99
0.270283	727.849		0.270283	792.656		0.270283	1075.43		0.270283	1110.92		0.270283	1160.89		0.270283	1211.32
0.273177	735.178		0.273177	802.777		0.273177	1075.12		0.273177	1110.52		0.273177	1160.37		0.273177	1210.65
0.276071	742.582		0.276071	813.078		0.276071	1074.8		0.276071	1110.11		0.276071	1159.85		0.276071	1209.97
0.278965	750.087		0.278965	823.582		0.278965	1074.48		0.278965	1109.71		0.278965	1159.33		0.278965	1209.29
0.281859	757.715		0.281859	834.302		0.281859	1074.15		0.281859	1109.3		0.281859	1158.8		0.281859	1208.6
0.284752	765.449		0.284752	845.237		0.284752	1073.83		0.284752	1108.88		0.284752	1158.27		0.284752	1207.91
0.287646	773.27		0.287646	856.388		0.287646	1073.5		0.287646	1108.47		0.287646	1157.73		0.287646	1207.21
0.29054	781.208		0.29054	867.755		0.29054	1073.17		0.29054	1108.05		0.29054	1157.19		0.29054	1206.51
0.293434	789.216		0.293434	879.328		0.293434	1072.84		0.293434	1107.63		0.293434	1156.64		0.293434	1205.8
0.296328	797.28		0.296328	891.114		0.296328	1072.5		0.296328	1107.2		0.296328	1156.1		0.296328	1205.09
0.299222	805.454		0.299222	903.138		0.299222	1072.16		0.299222	1106.78		0.299222	1155.55		0.299222	1204.37
0.302116	813.787		0.302116	915.406		0.302116	1071.82		0.302116	1106.35		0.302116	1154.99		0.302116	1203.65
0.30501	822.32		0.30501	927.912		0.30501	1071.48		0.30501	1105.92		0.30501	1154.43		0.30501	1202.92
0.307904	831.05		0.307904	940.624		0.307904	1071.13		0.307904	1105.49		0.307904	1153.87		0.307904	1202.19
0.310797	839.968		0.310797	953.539		0.310797	1070.79		0.310797	1105.05		0.310797	1153.3		0.310797	1201.45
0.313691	849.122		0.313691	966.69		0.313691	1070.44		0.313691	1104.61		0.313691	1152.74		0.313691	1200.71
0.313691	849.122		0.313691	966.69		0.313691	1070.44		0.313691	1104.61		0.313691	1152.74		0.313691	1200.71
0.316585	858.54		0.316585	980.082		0.316585	1070.08		0.316585	1104.17		0.316585	1152.16		0.316585	1199.97
0.319479	868.175		0.319479	993.723		0.319479	1069.73		0.319479	1103.73		0.319479	1151.59		0.319479	1199.22
0.322373	878.024		0.322373	1007.62		0.322373	1069.38		0.322373	1103.28		0.322373	1151.01		0.322373	1198.46
0.325267	888.096		0.325267	1021.78		0.325267	1069.02		0.325267	1102.84		0.325267	1150.43		0.325267	1197.71
0.328161	898.396		0.328161	1036.25		0.328161	1068.66		0.328161	1102.39		0.328161	1149.84		0.328161	1196.94
0.331055	908.97		0.331055	1050.99		0.331055	1068.3		0.331055	1101.94		0.331055	1149.25		0.331055	1196.18
0.333949	919.839		0.333949	1066		0.333949	1067.94		0.333949	1101.49		0.333949	1148.66		0.333949	1195.41
0.336842	930.993		0.336842	1081.36		0.336842	1067.57		0.336842	1101.03		0.336842	1148.07		0.336842	1194.64
0.339736	942.405		0.339736	1096.97		0.339736	1067.21		0.339736	1100.57		0.339736	1147.47		0.339736	1193.86
0.34263	954.114		0.34263	1112.85		0.34263	1066.84		0.34263	1100.11		0.34263	1146.87		0.34263	1193.08
0.345524	966.177		0.345524	1129.03		0.345524	1066.48		0.345524	1099.65		0.345524	1146.27		0.345524	1192.3
0.348418	978.588		0.348418	1145.43		0.348418	1066.11		0.348418	1099.19		0.348418	1145.66		0.348418	1191.51
0.351312	991.369		0.351312	1162.1		0.351312	1065.74		0.351312	1098.73		0.351312	1145.05		0.351312	1190.72
0.354206	1004.54		0.354206	1179.1		0.354206	1065.37		0.354206	1098.26		0.354206	1144.44		0.354206	1189.93
0.3571	1018.08		0.3571	1196.5		0.3571	1064.99		0.3571	1097.79		0.3571	1143.83		0.3571	1189.13
0.359994	1032.04		0.359994	1214.25		0.359994	1064.62		0.359994	1097.32		0.359994	1143.21		0.359994	1188.33
0.362887	1046.43		0.362887	1232.4		0.362887	1064.24		0.362887	1096.85		0.362887	1142.59		0.362887	1187.53
0.365781	1061.16		0.365781	1250.75		0.365781	1063.87		0.365781	1096.37		0.365781	1141.97		0.365781	1186.73
0.368675	1076.38		0.368675	1269.14		0.368675	1063.49		0.368675	1095.9		0.368675	1141.34		0.368675	1185.92
0.371569	1092.2		0.371569	1287.76		0.371569	1063.11		0.371569	1095.42		0.371569	1140.71		0.371569	1185.11
0.374463	1108.57		0.374463	1306.73		0.374463	1062.73		0.374463	1094.94		0.374463	1140.08		0.374463	1184.3
0.377357	1125.36		0.377357	1326.02		0.377357	1062.35		0.377357	1094.46		0.377357	1139.45		0.377357	1183.49
0.380251	1142.49		0.380251	1345.48		0.380251	1061.97		0.380251	1093.97		0.380251	1138.82		0.380251	1182.67
0.383145	1160.03		0.383145	1365.09		0.383145	1061.59		0.383145	1093.49		0.383145	1138.18		0.383145	1181.85
0.386039	1178.05		0.386039	1384.83		0.386039	1061.21		0.386039	1093		0.386039	1137.54		0.386039	1181.03
0.388932	1196.6		0.388932	1404.69		0.388932	1060.82		0.388932	1092.51		0.388932	1136.9		0.388932	1180.21
0.391826	1215.77		0.391826	1424.81		0.391826	1060.44		0.391826	1092.02		0.391826	1136.25		0.391826	1179.39
0.39472	1235.46		0.39472	1445.11		0.39472	1060.05		0.39472	1091.53		0.39472	1135.61		0.39472	1178.56
0.397614	1255.55		0.397614	1465.37		0.397614	1059.66		0.397614	1091.03		0.397614	1134.96		0.397614	1177.74
0.400508	1276.06		0.400508	1485.58		0.400508	1059.28		0.400508	1090.54		0.400508	1134.31		0.400508	1176.91
0.403402	1297		0.403402	1505.71		0.403402	1058.89		0.403402	1090.04		0.403402	1133.66		0.403402	1176.08
0.403402	1297		0.403402	1505.71		0.403402	1058.89		0.403402	1090.04		0.403402	1133.66		0.403402	1176.08
0.406296	1318.32		0.406296	1525.73		0.406296	1058.5		0.406296	1089.54		0.406296	1133.01		0.406296	1175.25
0.40919	1340		0.40919	1545.61		0.40919	1058.11		0.40919	1089.04		0.40919	1132.35		0.40919	1174.42
0.412084	1361.97		0.412084	1565.31		0.412084	1057.72		0.412084	1088.54		0.412084	1131.69		0.412084	1173.58
0.414977	1384.19		0.414977	1584.74		0.414977	1057.33		0.414977	1088.04		0.414977	1131.03		0.414977	1172.75
0.417871	1406.58		0.417871	1603.82		0.417871	1056.93		0.417871	1087.53		0.417871	1130.37		0.417871	1171.92
0.420765	1429.08		0.420765	1622.45		0.420765	1056.54		0.420765	1087.03		0.420765	1129.71		0.420765	1171.08
0.423659	1451.6		0.423659	1640.67		0.423659	1056.15		0.423659	1086.52		0.423659	1129.05		0.423659	1170.24
0.426553	1474.01		0.426553	1658.25		0.426553	1055.75		0.426553	1086.01		0.426553	1128.39		0.426553	1169.41
0.429447	1496.18		0.429447	1674.83		0.429447	1055.36		0.429447	1085.5		0.429447	1127.72		0.429447	1168.57
0.432341	1517.99		0.432341	1690.4		0.432341	1054.96		0.432341	1084.99		0.432341	1127.06		0.432341	1167.73
0.435235	1539.33		0.435235	1704.63		0.435235	1054.56		0.435235	1084.48		0.435235	1126.39		0.435235	1166.9
0.438129	1560.09		0.438129	1717.09		0.438129	1054.17		0.438129	1083.96		0.438129	1125.72		0.438129	1166.06
0.441023	1580.07		0.441023	1726.61		0.441023	1053.77		0.441023	1083.45		0.441023	1125.05		0.441023	1165.22
0.443916	1599.25		0.443916	1733.13		0.443916	1053.37		0.443916	1082.93		0.443916	1124.38		0.443916	1164.38
0.44681	1617.32		0.44681	1737.64		0.44681	1052.97		0.44681	1082.42		0.44681	1123.71		0.44681	1163.55
0.449704	1633.69		0.449704	1740		0.449704	1052.57		0.449704	1081.9		0.449704	1123.04		0.449704	1162.71
0.452598	1647.93		0.452598	1740.11		0.452598	1052.16		0.452598	1081.38		0.452598	1122.37		0.452598	1161.87
0.455492	1659.39		0.455492	1738.08		0.455492	1051.76		0.455492	1080.86		0.455492	1121.69		0.455492	1161.04
0.458386	1667.46		0.458386	1734.37		0.458386	1051.36		0.458386	1080.34		0.458386	1121.02		0.458386	1160.2
0.46128	1672.73		0.46128	1729.25		0.46128	1050.96		0.46128	1079.82		0.46128	1120.34		0.46128	1159.36
0.464174	1675.94		0.464174	1722.71		0.464174	1050.55		0.464174	1079.29		0.464174	1119.67		0.464174	1158.53
0.467068	1677.04		0.467068	1714.96		0.467068	1050.15		0.467068	1078.77		0.467068	1119		0.467068	1157.7
0.469961	1675.95		0.469961	1706.25		0.469961	1049.74		0.469961	1078.24		0.469961	1118.32		0.469961	1156.86
0.472855	1673		0.472855	1696.64		0.472855	1049.33		0.472855	1077.72		0.472855	1117.64		0.472855	1156.03
0.475749	1668.57		0.475749	1686.23		0.475749	1048.93		0.475749	1077.19		0.475749	1116.97		0.475749	1155.2
0.478643	1662.56		0.478643	1675.23		0.478643	1048.52		0.478643	1076.66		0.478643	1116.29		0.478643	1154.37
0.481537	1655.25		0.481537	1663.67		0.481537	1048.11		0.481537	1076.14		0.481537	1115.62		0.481537	1153.54
0.484431	1646.95		0.484431	1651.53		0.484431	1047.7		0.484431	1075.61		0.484431	1114.94		0.484431	1152.71
0.487325	1637.58		0.487325	1639.03		0.487325	1047.29		0.487325	1075.08		0.487325	1114.26		0.487325	1151.88
0.490219	1627.43		0.490219	1626.2		0.490219	1046.88		0.490219	1074.55		0.490219	1113.59		0.490219	1151.06
0.493113	1616.67		0.493113	1613.09		0.493113	1046.47		0.493113	1074.02		0.493113	1112.91		0.493113	1150.23
0.496006	1605.13		0.496006	1599.81		0.496006	1046.06		0.496006	1073.49		0.496006	1112.24		0.496006	1149.41
0.4989	1593.01		0.4989	1586.42		0.4989	1045.65		0.4989	1072.96		0.4989	1111.56		0.4989	1148.59
0.501794	1580.6		0.501794	1573.06		0.501794	1045.23		0.501794	1072.42		0.501794	1110.89		0.501794	1147.77
0.504688	1568		0.504688	1559.73		0.504688	1044.82		0.504688	1071.89		0.504688	1110.21		0.504688	1146.95
0.507582	1555.32		0.507582	1546.37		0.507582	1044.41		0.507582	1071.36		0.507582	1109.54		0.507582	1146.13
0.510476	1542.51		0.510476	1533.03		0.510476	1043.99		0.510476	1070.83		0.510476	1108.86		0.510476	1145.32
0.51337	1529.59		0.51337	1519.8		0.51337	1043.58		0.51337	1070.29		0.51337	1108.19		0.51337	1144.5
0.516264	1516.56		0.516264	1506.73		0.516264	1043.16		0.516264	1069.76		0.516264	1107.52		0.516264	1143.69
0.519158	1503.46		0.519158	1493.77		0.519158	1042.74		0.519158	1069.22		0.519158	1106.85		0.519158	1142.88
0.522051	1490.37		0.522051	1480.97		0.522051	1042.33		0.522051	1068.69		0.522051	1106.17		0.522051	1142.08
0.524945	1477.27		0.524945	1468.35		0.524945	1041.91		0.524945	1068.16		0.524945	1105.5		0.524945	1141.27
0.524945	1477.27		0.524945	1468.35		0.524945	1041.91		0.524945	1068.16		0.524945	1105.5		0.524945	1141.27
0.527839	1464.26		0.527839	1455.96		0.527839	1041.49		0.527839	1067.62		0.527839	1104.84		0.527839	1140.47
0.530733	1451.41		0.530733	1443.83		0.530733	1041.08		0.530733	1067.09		0.530733	1104.17		0.530733	1139.67
0.533627	1438.74		0.533627	1431.94		0.533627	1040.66		0.533627	1066.55		0.533627	1103.5		0.533627	1138.87
0.536521	1426.27		0.536521	1420.31		0.536521	1040.24		0.536521	1066.02		0.536521	1102.83		0.536521	1138.07
0.539415	1413.99		0.539415	1408.94		0.539415	1039.82		0.539415	1065.48		0.539415	1102.17		0.539415	1137.28
0.542309	1401.92		0.542309	1397.84		0.542309	1039.4		0.542309	1064.95		0.542309	1101.5		0.542309	1136.48
0.545203	1390.12		0.545203	1387.01		0.545203	1038.98		0.545203	1064.41		0.545203	1100.84		0.545203	1135.69
0.548096	1378.54		0.548096	1376.45		0.548096	1038.56		0.548096	1063.88		0.548096	1100.18		0.548096	1134.91
0.55099	1367.22		0.55099	1366.15		0.55099	1038.14		0.55099	1063.35		0.55099	1099.52		0.55099	1134.12
0.553884	1356.2		0.553884	1356.12		0.553884	1037.72		0.553884	1062.81		0.553884	1098.86		0.553884	1133.34
0.556778	1345.41		0.556778	1346.35		0.556778	1037.3		0.556778	1062.28		0.556778	1098.2		0.556778	1132.56
0.559672	1334.87		0.559672	1336.84		0.559672	1036.87		0.559672	1061.74		0.559672	1097.54		0.559672	1131.78
0.562566	1324.65		0.562566	1327.64		0.562566	1036.45		0.562566	1061.21		0.562566	1096.89		0.562566	1131
0.56546	1314.69		0.56546	1318.7		0.56546	1036.03		0.56546	1060.68		0.56546	1096.23		0.56546	1130.23
0.568354	1304.95		0.568354	1310		0.568354	1035.61		0.568354	1060.15		0.568354	1095.58		0.568354	1129.46
0.571248	1295.49		0.571248	1301.57		0.571248	1035.19		0.571248	1059.62		0.571248	1094.93		0.571248	1128.69
0.574142	1286.34		0.574142	1293.41		0.574142	1034.76		0.574142	1059.08		0.574142	1094.28		0.574142	1127.93
0.577035	1277.45		0.577035	1285.51		0.577035	1034.34		0.577035	1058.55		0.577035	1093.63		0.577035	1127.17
0.579929	1268.79		0.579929	1277.84		0.579929	1033.92		0.579929	1058.02		0.579929	1092.99		0.579929	1126.41
0.582823	1260.42		0.582823	1270.36		0.582823	1033.49		0.582823	1057.5		0.582823	1092.34		0.582823	1125.65
0.585717	1252.34		0.585717	1263.11		0.585717	1033.07		0.585717	1056.97		0.585717	1091.7		0.585717	1124.9
0.588611	1244.51		0.588611	1256.11		0.588611	1032.65		0.588611	1056.44		0.588611	1091.06		0.588611	1124.15
0.591505	1236.87		0.591505	1249.35		0.591505	1032.22		0.591505	1055.91		0.591505	1090.42		0.591505	1123.4
0.594399	1229.45		0.594399	1242.79		0.594399	1031.8		0.594399	1055.39		0.594399	1089.79		0.594399	1122.66
0.597293	1222.32		0.597293	1236.41		0.597293	1031.38		0.597293	1054.86		0.597293	1089.15		0.597293	1121.92
0.600186	1215.45		0.600186	1230.22		0.600186	1030.95		0.600186	1054.34		0.600186	1088.52		0.600186	1121.18
0.60308	1208.81		0.60308	1224.23		0.60308	1030.53		0.60308	1053.81		0.60308	1087.89		0.60308	1120.44
0.605974	1202.38		0.605974	1218.45		0.605974	1030.11		0.605974	1053.29		0.605974	1087.26		0.605974	1119.71
0.608868	1196.09		0.608868	1212.87		0.608868	1029.68		0.608868	1052.77		0.608868	1086.63		0.608868	1118.98
0.611762	1190		0.611762	1207.47		0.611762	1029.26		0.611762	1052.25		0.611762	1086.01		0.611762	1118.25
0.614656	1184.14		0.614656	1202.24		0.614656	1028.84		0.614656	1051.73		0.614656	1085.39		0.614656	1117.53
0.61755	1178.51		0.61755	1197.15		0.61755	1028.41		0.61755	1051.21		0.61755	1084.77		0.61755	1116.81
0.620444	1173.08		0.620444	1192.2		0.620444	1027.99		0.620444	1050.7		0.620444	1084.15		0.620444	1116.09
0.623338	1167.83		0.623338	1187.38		0.623338	1027.57		0.623338	1050.18		0.623338	1083.54		0.623338	1115.38
0.626231	1162.73		0.626231	1182.73		0.626231	1027.15		0.626231	1049.67		0.626231	1082.92		0.626231	1114.67
0.629125	1157.75		0.629125	1178.23		0.629125	1026.73		0.629125	1049.15		0.629125	1082.31		0.629125	1113.96
0.632019	1152.89		0.632019	1173.89		0.632019	1026.31		0.632019	1048.64		0.632019	1081.71		0.632019	1113.26
0.634913	1148.18		0.634913	1169.69		0.634913	1025.89		0.634913	1048.13		0.634913	1081.1		0.634913	1112.55
0.637807	1143.65		0.637807	1165.6		0.637807	1025.47		0.637807	1047.62		0.637807	1080.5		0.637807	1111.86
0.640701	1139.27		0.640701	1161.63		0.640701	1025.05		0.640701	1047.12		0.640701	1079.89		0.640701	1111.16
0.643595	1135.01		0.643595	1157.74		0.643595	1024.63		0.643595	1046.61		0.643595	1079.3		0.643595	1110.47
0.643595	1135.01		0.643595	1157.74		0.643595	1024.63		0.643595	1046.61		0.643595	1079.3		0.643595	1110.47
0.646489	1130.88		0.646489	1153.94		0.646489	1024.21		0.646489	1046.1		0.646489	1078.7		0.646489	1109.78
0.649383	1126.89		0.649383	1150.25		0.649383	1023.79		0.649383	1045.6		0.649383	1078.11		0.649383	1109.09
0.652277	1123.03		0.652277	1146.66		0.652277	1023.37		0.652277	1045.1		0.652277	1077.51		0.652277	1108.41
0.65517	1119.31		0.65517	1143.18		0.65517	1022.96		0.65517	1044.6		0.65517	1076.93		0.65517	1107.73
0.658064	1115.71		0.658064	1139.8		0.658064	1022.54		0.658064	1044.1		0.658064	1076.34		0.658064	1107.05
0.660958	1112.24		0.660958	1136.52		0.660958	1022.13		0.660958	1043.61		0.660958	1075.76		0.660958	1106.38
0.663852	1108.88		0.663852	1133.34		0.663852	1021.71		0.663852	1043.11		0.663852	1075.17		0.663852	1105.71
0.666746	1105.63		0.666746	1130.24		0.666746	1021.3		0.666746	1042.62		0.666746	1074.59		0.666746	1105.04
0.66964	1102.49		0.66964	1127.23		0.66964	1020.88		0.66964	1042.13		0.66964	1074.02		0.66964	1104.38
0.672534	1099.46		0.672534	1124.31		0.672534	1020.47		0.672534	1041.64		0.672534	1073.44		0.672534	1103.71
0.675428	1096.53		0.675428	1121.47		0.675428	1020.06		0.675428	1041.15		0.675428	1072.87		0.675428	1103.05
0.678322	1093.69		0.678322	1118.7		0.678322	1019.65		0.678322	1040.66		0.678322	1072.3		0.678322	1102.4
0.681215	1090.95		0.681215	1116.01		0.681215	1019.24		0.681215	1040.18		0.681215	1071.73		0.681215	1101.74
0.684109	1088.29		0.684109	1113.38		0.684109	1018.84		0.684109	1039.7		0.684109	1071.17		0.684109	1101.09
0.687003	1085.72		0.687003	1110.83		0.687003	1018.43		0.687003	1039.22		0.687003	1070.6		0.687003	1100.44
0.689897	1083.23		0.689897	1108.34		0.689897	1018.02		0.689897	1038.74		0.689897	1070.04		0.689897	1099.79
0.692791	1080.81		0.692791	1105.92		0.692791	1017.62		0.692791	1038.26		0.692791	1069.48		0.692791	1099.15
0.695685	1078.47		0.695685	1103.56		0.695685	1017.21		0.695685	1037.78		0.695685	1068.93		0.695685	1098.51
0.698579	1076.19		0.698579	1101.26		0.698579	1016.81		0.698579	1037.31		0.698579	1068.37		0.698579	1097.86
0.701473	1073.98		0.701473	1099.02		0.701473	1016.41		0.701473	1036.83		0.701473	1067.82		0.701473	1097.22
0.704367	1071.83		0.704367	1096.83		0.704367	1016.01		0.704367	1036.36		0.704367	1067.26		0.704367	1096.59
0.70726	1069.74		0.70726	1094.7		0.70726	1015.61		0.70726	1035.89		0.70726	1066.71		0.70726	1095.95
0.710154	1067.7		0.710154	1092.62		0.710154	1015.21		0.710154	1035.42		0.710154	1066.16		0.710154	1095.31
0.713048	1065.72		0.713048	1090.58		0.713048	1014.81		0.713048	1034.96		0.713048	1065.61		0.713048	1094.68
0.715942	1063.79		0.715942	1088.59		0.715942	1014.42		0.715942	1034.49		0.715942	1065.07		0.715942	1094.04
0.715942	1063.79		0.715942	1088.59		0.715942	1014.42		0.715942	1034.49		0.715942	1065.07		0.715942	1094.04
0.718836	1061.91		0.718836	1086.63		0.718836	1014.02		0.718836	1034.02		0.718836	1064.52		0.718836	1093.41
0.72173	1060.09		0.72173	1084.72		0.72173	1013.63		0.72173	1033.56		0.72173	1063.97		0.72173	1092.77
0.724624	1058.31		0.724624	1082.85		0.724624	1013.23		0.724624	1033.09		0.724624	1063.42		0.724624	1092.13
0.727518	1056.57		0.727518	1081.02		0.727518	1012.84		0.727518	1032.63		0.727518	1062.87		0.727518	1091.49
0.730412	1054.88		0.730412	1079.22		0.730412	1012.44		0.730412	1032.16		0.730412	1062.32		0.730412	1090.85
0.733305	1053.22		0.733305	1077.46		0.733305	1012.05		0.733305	1031.69		0.733305	1061.77		0.733305	1090.21
0.736199	1051.61		0.736199	1075.72		0.736199	1011.66		0.736199	1031.23		0.736199	1061.22		0.736199	1089.56
0.739093	1050.03		0.739093	1074.02		0.739093	1011.26		0.739093	1030.76		0.739093	1060.66		0.739093	1088.91
0.741987	1048.48		0.741987	1072.35		0.741987	1010.87		0.741987	1030.28		0.741987	1060.1		0.741987	1088.25
0.744881	1046.96		0.744881	1070.7		0.744881	1010.47		0.744881	1029.81		0.744881	1059.53		0.744881	1087.59
0.747775	1045.47		0.747775	1069.07		0.747775	1010.08		0.747775	1029.33		0.747775	1058.95		0.747775	1086.92
0.750669	1044		0.750669	1067.47		0.750669	1009.68		0.750669	1028.84		0.750669	1058.37		0.750669	1086.23
0.753563	1042.56		0.753563	1065.88		0.753563	1009.27		0.753563	1028.35		0.753563	1057.78		0.753563	1085.54
0.756457	1041.13		0.756457	1064.3		0.756457	1008.87		0.756457	1027.85		0.756457	1057.18		0.756457	1084.83
0.75935	1039.73		0.75935	1062.74		0.75935	1008.45		0.75935	1027.35		0.75935	1056.57		0.75935	1084.11
0.762244	1038.33		0.762244	1061.18		0.762244	1008.03		0.762244	1026.83		0.762244	1055.94		0.762244	1083.36
0.765138	1036.94		0.765138	1059.63		0.765138	1007.61		0.765138	1026.3		0.765138	1055.29		0.765138	1082.6
0.768032	1035.56		0.768032	1058.07		0.768032	1007.17		0.768032	1025.75		0.768032	1054.63		0.768032	1081.82
0.770926	1034.17		0.770926	1056.51		0.770926	1006.72		0.770926	1025.19		0.770926	1053.94		0.770926	1081
0.77382	1032.79		0.77382	1054.93		0.77382	1006.26		0.77382	1024.61		0.77382	1053.23		0.77382	1080.16
0.776714	1031.39		0.776714	1053.34		0.776714	1005.79		0.776714	1024.01		0.776714	1052.5		0.776714	1079.29
0.779608	1029.99		0.779608	1051.72		0.779608	1005.3		0.779608	1023.39		0.779608	1051.73		0.779608	1078.38
0.782502	1028.56		0.782502	1050.08		0.782502	1004.79		0.782502	1022.74		0.782502	1050.94		0.782502	1077.43
0.785396	1027.12		0.785396	1048.41		0.785396	1004.26		0.785396	1022.07		0.785396	1050.11		0.785396	1076.45
0.788289	1025.65		0.788289	1046.7		0.788289	1003.71		0.788289	1021.37		0.788289	1049.25		0.788289	1075.42
0.791183	1024.17		0.791183	1044.97		0.791183	1003.15		0.791183	1020.65		0.791183	1048.36		0.791183	1074.35
0.794077	1022.65		0.794077	1043.2		0.794077	1002.55		0.794077	1019.9		0.794077	1047.42		0.794077	1073.24
0.796971	1021.12		0.796971	1041.42		0.796971	1001.94		0.796971	1019.11		0.796971	1046.45		0.796971	1072.07
0.799865	1019.56		0.799865	1039.61		0.799865	1001.3		0.799865	1018.3		0.799865	1045.44		0.799865	1070.86
0.799865	1019.56		0.799865	1039.61		0.799865	1001.3		0.799865	1018.3		0.799865	1045.44		0.799865	1070.86
0.802759	1017.99		0.802759	1037.78		0.802759	1000.63		0.802759	1017.45		0.802759	1044.38		0.802759	1069.6
0.805653	1016.41		0.805653	1035.94		0.805653	999.934		0.805653	1016.56		0.805653	1043.28		0.805653	1068.29
0.808547	1014.82		0.808547	1034.1		0.808547	999.203		0.808547	1015.64		0.808547	1042.14		0.808547	1066.92
0.811441	1013.23		0.811441	1032.25		0.811441	998.437		0.811441	1014.67		0.811441	1040.95		0.811441	1065.51
0.814334	1011.64		0.814334	1030.4		0.814334	997.633		0.814334	1013.66		0.814334	1039.7		0.814334	1064.03
0.817228	1010.05		0.817228	1028.54		0.817228	996.786		0.817228	1012.6		0.817228	1038.41		0.817228	1062.5
0.820122	1008.46		0.820122	1026.68		0.820122	995.893		0.820122	1011.49		0.820122	1037.06		0.820122	1060.91
0.823016	1006.88		0.823016	1024.81		0.823016	994.951		0.823016	1010.33		0.823016	1035.66		0.823016	1059.27
0.82591	1005.3		0.82591	1022.94		0.82591	993.956		0.82591	1009.12		0.82591	1034.2		0.82591	1057.56
0.828804	1003.72		0.828804	1021.06		0.828804	992.904		0.828804	1007.85		0.828804	1032.68		0.828804	1055.8
0.831698	1002.14		0.831698	1019.16		0.831698	991.793		0.831698	1006.52		0.831698	1031.1		0.831698	1053.99
0.834592	1000.57		0.834592	1017.27		0.834592	990.619		0.834592	1005.13		0.834592	1029.47		0.834592	1052.12
0.837486	999.001		0.837486	1015.36		0.837486	989.382		0.837486	1003.68		0.837486	1027.79		0.837486	1050.2
0.840379	997.438		0.840379	1013.46		0.840379	988.081		0.840379	1002.17		0.840379	1026.05		0.840379	1048.24
0.843273	995.885		0.843273	1011.55		0.843273	986.716		0.843273	1000.61		0.843273	1024.27		0.843273	1046.23
0.846167	994.345		0.846167	1009.65		0.846167	985.291		0.846167	998.999		0.846167	1022.44		0.846167	1044.2
0.849061	992.822		0.849061	1007.76		0.849061	983.809		0.849061	997.341		0.849061	1020.58		0.849061	1042.14
0.851955	991.322		0.851955	1005.89		0.851955	982.277		0.851955	995.646		0.851955	1018.7		0.851955	1040.07
0.854849	989.852		0.854849	1004.05		0.854849	980.704		0.854849	993.924		0.854849	1016.81		0.854849	1037.99
0.857743	988.419		0.857743	1002.25		0.857743	979.101		0.857743	992.187		0.857743	1014.91		0.857743	1035.93
0.860637	987.034		0.860637	1000.49		0.860637	977.485		0.860637	990.453		0.860637	1013.04		0.860637	1033.9
0.863531	985.711		0.863531	998.813		0.863531	975.878		0.863531	988.743		0.863531	1011.2		0.863531	1031.93
0.866424	984.468		0.866424	997.226		0.866424	974.308		0.866424	987.089		0.866424	1009.44		0.866424	1030.04
0.869318	983.335		0.869318	995.771		0.869318	972.823		0.869318	985.535		0.869318	1007.79		0.869318	1028.29
0.872212	982.359		0.872212	994.51		0.872212	971.496		0.872212	984.158		0.872212	1006.34		0.872212	1026.75
0.875106	981.624		0.875106	993.551		0.875106	970.454		0.875106	983.086		0.875106	1005.22		0.875106	1025.57
0.878	981.331		0.878	993.166		0.878	970.024		0.878	982.647		0.878	1004.77		0.878	1025.09

## Sheet: Axial Velocity
SN 0			SN 0.2			SN 0.4			SN 0.6			SN 0.8			SN 1
Axial distance	velocity		Axial distance	velocity		Axial distance	velocity		Axial distance	velocity		Axial distance	velocity		Axial distance	velocity
0.00115113	13.972		0.00115113	14.0308		0.00115113	13.9685		0.00115113	13.559		0.00115113	13.4008		0.00115113	13.3412
0.00404502	13.9701		0.00404502	14.0113		0.00404502	13.852		0.00404502	13.2934		0.00404502	13.1114		0.00404502	13.0528
0.00693891	13.957		0.00693891	13.9793		0.00693891	13.7072		0.00693891	13.0012		0.00693891	12.7965		0.00693891	12.7345
0.0098328	13.9339		0.0098328	13.9338		0.0098328	13.5366		0.0098328	12.6798		0.0098328	12.4441		0.0098328	12.3738
0.0127267	13.9016		0.0127267	13.8737		0.0127267	13.3416		0.0127267	12.3227		0.0127267	12.0449		0.0127267	11.9622
0.0156206	13.8618		0.0156206	13.8007		0.0156206	13.1238		0.0156206	11.9249		0.0156206	11.5952		0.0156206	11.4983
0.0185145	13.8156		0.0185145	13.7176		0.0185145	12.885		0.0185145	11.4859		0.0185145	11.0962		0.0185145	10.9865
0.0214084	13.7625		0.0214084	13.6257		0.0214084	12.6271		0.0214084	11.0083		0.0214084	10.5529		0.0214084	10.4364
0.0243023	13.7019		0.0243023	13.5254		0.0243023	12.3527		0.0243023	10.4952		0.0243023	9.97345		0.0243023	9.8626
0.0271961	13.6357		0.0271961	13.4186		0.0271961	12.0648		0.0271961	9.95033		0.0271961	9.36882		0.0271961	9.2796
0.03009	13.5673		0.03009	13.3088		0.03009	11.7657		0.03009	9.38032		0.03009	8.75229		0.03009	8.69991
0.0329839	13.4991		0.0329839	13.1992		0.0329839	11.4569		0.0329839	8.79323		0.0329839	8.1386		0.0329839	8.13553
0.0358778	13.432		0.0358778	13.0905		0.0358778	11.1399		0.0358778	8.19622		0.0358778	7.54153		0.0358778	7.59675
0.0387717	13.3675		0.0387717	12.9835		0.0387717	10.8159		0.0387717	7.59754		0.0387717	6.97091		0.0387717	7.08993
0.0416656	13.3058		0.0416656	12.8797		0.0416656	10.4873		0.0416656	7.00713		0.0416656	6.43346		0.0416656	6.61909
0.0445595	13.2458		0.0445595	12.7786		0.0445595	10.1563		0.0445595	6.43341		0.0445595	5.93284		0.0445595	6.1856
0.0474534	13.1892		0.0474534	12.6815		0.0474534	9.82283		0.0474534	5.88087		0.0474534	5.46856		0.0474534	5.78762
0.0503473	13.1383		0.0503473	12.5902		0.0503473	9.48684		0.0503473	5.35114		0.0503473	5.03667		0.0503473	5.42108
0.0532412	13.0924		0.0532412	12.5038		0.0532412	9.14896		0.0532412	4.84403		0.0532412	4.63039		0.0532412	5.08063
0.056135	13.0504		0.056135	12.4208		0.056135	8.80991		0.056135	4.35761		0.056135	4.24276		0.056135	4.76171
0.0590289	13.0122		0.0590289	12.3406		0.0590289	8.47025		0.0590289	3.89008		0.0590289	3.86792		0.0590289	4.45975
0.0619228	12.9778		0.0619228	12.2629		0.0619228	8.13017		0.0619228	3.44045		0.0619228	3.50115		0.0619228	4.16923
0.0648167	12.9469		0.0648167	12.1871		0.0648167	7.78955		0.0648167	3.00748		0.0648167	3.13894		0.0648167	3.8853
0.0677106	12.9195		0.0677106	12.113		0.0677106	7.44872		0.0677106	2.59103		0.0677106	2.77911		0.0677106	3.60407
0.0706045	12.8951		0.0706045	12.0405		0.0706045	7.10843		0.0706045	2.1945		0.0706045	2.42217		0.0706045	3.32164
0.0734984	12.8733		0.0734984	11.9697		0.0734984	6.76877		0.0734984	1.82334		0.0734984	2.07246		0.0734984	3.03447
0.0763923	12.8538		0.0763923	11.9006		0.0763923	6.42971		0.0763923	1.48065		0.0763923	1.73634		0.0763923	2.74096
0.0792862	12.8363		0.0792862	11.8331		0.0792862	6.09098		0.0792862	1.16226		0.0792862	1.41769		0.0792862	2.44249
0.0821801	12.8204		0.0821801	11.7674		0.0821801	5.75136		0.0821801	0.847481		0.0821801	1.11095		0.0821801	2.14315
0.085074	12.8058		0.085074	11.7035		0.085074	5.41033		0.085074	0.518756		0.085074	0.797704		0.085074	1.84884
0.085074	12.8058		0.085074	11.7035		0.085074	5.41033		0.085074	0.518756		0.085074	0.797704		0.085074	1.84884
0.0879678	12.7922		0.0879678	11.6419		0.0879678	5.06765		0.0879678	0.177243		0.0879678	0.462394		0.0879678	1.56493
0.0908617	12.7795		0.0908617	11.5827		0.0908617	4.72252		0.0908617	-0.15475		0.0908617	0.10958		0.0908617	1.29344
0.0937556	12.7675		0.0937556	11.5256		0.0937556	4.37439		0.0937556	-0.443585		0.0937556	-0.232899		0.0937556	1.02554
0.0966495	12.7563		0.0966495	11.4705		0.0966495	4.02235		0.0966495	-0.673111		0.0966495	-0.530817		0.0966495	0.747492
0.0995434	12.746		0.0995434	11.4175		0.0995434	3.6651		0.0995434	-0.848338		0.0995434	-0.767708		0.0995434	0.450239
0.102437	12.7364		0.102437	11.3667		0.102437	3.3028		0.102437	-0.985263		0.102437	-0.949517		0.102437	0.13772
0.105331	12.7274		0.105331	11.318		0.105331	2.93754		0.105331	-1.09814		0.105331	-1.09318		0.105331	-0.168404
0.108225	12.7187		0.108225	11.271		0.108225	2.57334		0.108225	-1.19576		0.108225	-1.21287		0.108225	-0.442497
0.111119	12.7105		0.111119	11.2255		0.111119	2.21728		0.111119	-1.28343		0.111119	-1.31665		0.111119	-0.668402
0.114013	12.703		0.114013	11.1815		0.114013	1.8779		0.114013	-1.36447		0.114013	-1.40896		0.114013	-0.845952
0.116907	12.6965		0.116907	11.139		0.116907	1.56073		0.116907	-1.44073		0.116907	-1.49254		0.116907	-0.986047
0.119801	12.6912		0.119801	11.0982		0.119801	1.26449		0.119801	-1.51336		0.119801	-1.56919		0.119801	-1.10068
0.122695	12.6868		0.122695	11.059		0.122695	0.979612		0.122695	-1.58333		0.122695	-1.64002		0.122695	-1.19808
0.125588	12.6833		0.125588	11.0212		0.125588	0.694097		0.125588	-1.6513		0.125588	-1.70578		0.125588	-1.28301
0.128482	12.6805		0.128482	10.9845		0.128482	0.404596		0.128482	-1.71758		0.128482	-1.76712		0.128482	-1.35818
0.131376	12.6783		0.131376	10.9489		0.131376	0.117883		0.131376	-1.78227		0.131376	-1.82445		0.131376	-1.42531
0.13427	12.6767		0.13427	10.9143		0.13427	-0.152555		0.13427	-1.84534		0.13427	-1.87792		0.13427	-1.4855
0.137164	12.6755		0.137164	10.8807		0.137164	-0.391913		0.137164	-1.90663		0.137164	-1.92757		0.137164	-1.5396
0.140058	12.675		0.140058	10.8479		0.140058	-0.591028		0.140058	-1.96591		0.140058	-1.97342		0.140058	-1.58823
0.142952	12.6751		0.142952	10.8159		0.142952	-0.747924		0.142952	-2.023		0.142952	-2.01548		0.142952	-1.63175
0.145846	12.6756		0.145846	10.7845		0.145846	-0.867586		0.145846	-2.07773		0.145846	-2.05379		0.145846	-1.67042
0.14874	12.6765		0.14874	10.7538		0.14874	-0.959349		0.14874	-2.12986		0.14874	-2.08838		0.14874	-1.70452
0.151633	12.6777		0.151633	10.7239		0.151633	-1.03261		0.151633	-2.17918		0.151633	-2.11925		0.151633	-1.73428
0.154527	12.6793		0.154527	10.6946		0.154527	-1.09444		0.154527	-2.22549		0.154527	-2.14641		0.154527	-1.75988
0.157421	12.6813		0.157421	10.6659		0.157421	-1.14961		0.157421	-2.26864		0.157421	-2.16989		0.157421	-1.78143
0.160315	12.6836		0.160315	10.6376		0.160315	-1.20135		0.160315	-2.30849		0.160315	-2.18975		0.160315	-1.79908
0.163209	12.6863		0.163209	10.6098		0.163209	-1.25194		0.163209	-2.34492		0.163209	-2.20602		0.163209	-1.81296
0.166103	12.6892		0.166103	10.5825		0.166103	-1.3028		0.166103	-2.37786		0.166103	-2.21886		0.166103	-1.82327
0.166103	12.6892		0.166103	10.5825		0.166103	-1.3028		0.166103	-2.37786		0.166103	-2.21886		0.166103	-1.82327
0.168997	12.6923		0.168997	10.5558		0.168997	-1.35447		0.168997	-2.40725		0.168997	-2.22821		0.168997	-1.83009
0.171891	12.6958		0.171891	10.5296		0.171891	-1.40716		0.171891	-2.43308		0.171891	-2.23427		0.171891	-1.83372
0.174785	12.6995		0.174785	10.5041		0.174785	-1.4611		0.174785	-2.45534		0.174785	-2.23732		0.174785	-1.83425
0.177678	12.7034		0.177678	10.4791		0.177678	-1.51639		0.177678	-2.47403		0.177678	-2.23713		0.177678	-1.83168
0.180572	12.7074		0.180572	10.4545		0.180572	-1.57283		0.180572	-2.48921		0.180572	-2.23387		0.180572	-1.82642
0.183466	12.7114		0.183466	10.4303		0.183466	-1.63009		0.183466	-2.50084		0.183466	-2.22786		0.183466	-1.8186
0.18636	12.7155		0.18636	10.4066		0.18636	-1.68784		0.18636	-2.50899		0.18636	-2.21913		0.18636	-1.80828
0.189254	12.7196		0.189254	10.3834		0.189254	-1.74573		0.189254	-2.51391		0.189254	-2.20778		0.189254	-1.79567
0.192148	12.7239		0.192148	10.3607		0.192148	-1.80335		0.192148	-2.51565		0.192148	-2.19394		0.192148	-1.7809
0.195042	12.7284		0.195042	10.3384		0.195042	-1.86026		0.195042	-2.51387		0.195042	-2.17775		0.195042	-1.76413
0.197936	12.733		0.197936	10.3165		0.197936	-1.91608		0.197936	-2.50904		0.197936	-2.15933		0.197936	-1.7455
0.20083	12.7379		0.20083	10.2949		0.20083	-1.97044		0.20083	-2.50142		0.20083	-2.13881		0.20083	-1.72516
0.203723	12.7429		0.203723	10.2738		0.203723	-2.02298		0.203723	-2.49077		0.203723	-2.11632		0.203723	-1.70323
0.206617	12.7481		0.206617	10.253		0.206617	-2.07336		0.206617	-2.47738		0.206617	-2.09199		0.206617	-1.67986
0.209511	12.7534		0.209511	10.2325		0.209511	-2.12129		0.209511	-2.46133		0.209511	-2.06594		0.209511	-1.65517
0.212405	12.7586		0.212405	10.2122		0.212405	-2.16652		0.212405	-2.44275		0.212405	-2.03829		0.212405	-1.62928
0.215299	12.7639		0.215299	10.1921		0.215299	-2.20882		0.215299	-2.42176		0.215299	-2.00916		0.215299	-1.6023
0.215299	12.7639		0.215299	10.1921		0.215299	-2.20882		0.215299	-2.42176		0.215299	-2.00916		0.215299	-1.6023
0.218193	12.769		0.218193	10.1723		0.218193	-2.24801		0.218193	-2.3985		0.218193	-1.97868		0.218193	-1.57436
0.221087	12.7739		0.221087	10.1526		0.221087	-2.28394		0.221087	-2.37309		0.221087	-1.94696		0.221087	-1.54555
0.223981	12.7788		0.223981	10.1331		0.223981	-2.3165		0.223981	-2.34566		0.223981	-1.9141		0.223981	-1.51599
0.226875	12.7838		0.226875	10.1135		0.226875	-2.34558		0.226875	-2.31634		0.226875	-1.88023		0.226875	-1.48577
0.229768	12.7886		0.229768	10.094		0.229768	-2.37114		0.229768	-2.28525		0.229768	-1.84543		0.229768	-1.45497
0.232662	12.793		0.232662	10.0743		0.232662	-2.39312		0.232662	-2.25252		0.232662	-1.80983		0.232662	-1.4237
0.235556	12.797		0.235556	10.0544		0.235556	-2.41149		0.235556	-2.21827		0.235556	-1.7735		0.235556	-1.39204
0.23845	12.801		0.23845	10.0343		0.23845	-2.42626		0.23845	-2.18263		0.23845	-1.73656		0.23845	-1.36006
0.241344	12.8048		0.241344	10.0141		0.241344	-2.43744		0.241344	-2.1457		0.241344	-1.69908		0.241344	-1.32784
0.244238	12.8084		0.244238	9.99377		0.244238	-2.44506		0.244238	-2.10762		0.244238	-1.66116		0.244238	-1.29545
0.247132	12.8117		0.247132	9.97329		0.247132	-2.44928		0.247132	-2.06848		0.247132	-1.62287		0.247132	-1.26296
0.250026	12.8147		0.250026	9.95272		0.250026	-2.45009		0.250026	-2.0284		0.250026	-1.58429		0.250026	-1.23043
0.25292	12.8175		0.25292	9.93209		0.25292	-2.44732		0.25292	-1.98749		0.25292	-1.54551		0.25292	-1.19791
0.255814	12.82		0.255814	9.91134		0.255814	-2.44133		0.255814	-1.94584		0.255814	-1.50658		0.255814	-1.16546
0.258707	12.8225		0.258707	9.89044		0.258707	-2.43228		0.258707	-1.90354		0.258707	-1.46758		0.258707	-1.13313
0.261601	12.8248		0.261601	9.86944		0.261601	-2.42008		0.261601	-1.86071		0.261601	-1.42856		0.261601	-1.10097
0.264495	12.827		0.264495	9.84834		0.264495	-2.40493		0.264495	-1.81742		0.264495	-1.38959		0.264495	-1.06902
0.267389	12.8292		0.267389	9.82705		0.267389	-2.38692		0.267389	-1.77375		0.267389	-1.35073		0.267389	-1.03732
0.270283	12.8313		0.270283	9.80554		0.270283	-2.36621		0.270283	-1.7298		0.270283	-1.31202		0.270283	-1.0059
0.273177	12.8332		0.273177	9.78384		0.273177	-2.3429		0.273177	-1.68563		0.273177	-1.27351		0.273177	-0.974802
0.276071	12.8349		0.276071	9.76199		0.276071	-2.31715		0.276071	-1.64133		0.276071	-1.23525		0.276071	-0.944051
0.278965	12.8366		0.278965	9.73998		0.278965	-2.28908		0.278965	-1.59696		0.278965	-1.19728		0.278965	-0.913674
0.281859	12.8385		0.281859	9.7178		0.281859	-2.25884		0.281859	-1.55258		0.281859	-1.15965		0.281859	-0.883696
0.284752	12.8401		0.284752	9.69542		0.284752	-2.22656		0.284752	-1.50826		0.284752	-1.12238		0.284752	-0.854139
0.287646	12.8414		0.287646	9.67273		0.287646	-2.19239		0.287646	-1.46406		0.287646	-1.0855		0.287646	-0.825022
0.29054	12.8425		0.29054	9.64966		0.29054	-2.15646		0.29054	-1.42003		0.29054	-1.04906		0.29054	-0.79636
0.293434	12.8432		0.293434	9.6262		0.293434	-2.11892		0.293434	-1.37623		0.293434	-1.01308		0.293434	-0.768168
0.296328	12.8432		0.296328	9.60242		0.296328	-2.07989		0.296328	-1.33269		0.296328	-0.977573		0.296328	-0.740458
0.299222	12.8423		0.299222	9.57827		0.299222	-2.03951		0.299222	-1.28947		0.299222	-0.942575		0.299222	-0.713241
0.302116	12.8406		0.302116	9.5536		0.302116	-1.99792		0.302116	-1.24661		0.302116	-0.908101		0.302116	-0.686523
0.30501	12.8382		0.30501	9.52832		0.30501	-1.95523		0.30501	-1.20414		0.30501	-0.874169		0.30501	-0.660311
0.307904	12.8353		0.307904	9.50234		0.307904	-1.91158		0.307904	-1.1621		0.307904	-0.840795		0.307904	-0.634609
0.310797	12.8316		0.310797	9.47556		0.310797	-1.86707		0.310797	-1.12053		0.310797	-0.807992		0.310797	-0.60942
0.313691	12.8269		0.313691	9.44794		0.313691	-1.82182		0.313691	-1.07945		0.313691	-0.775772		0.313691	-0.584745
0.313691	12.8269		0.313691	9.44794		0.313691	-1.82182		0.313691	-1.07945		0.313691	-0.775772		0.313691	-0.584745
0.316585	12.821		0.316585	9.41945		0.316585	-1.77596		0.316585	-1.03889		0.316585	-0.744143		0.316585	-0.560583
0.319479	12.8138		0.319479	9.39021		0.319479	-1.72956		0.319479	-0.998877		0.319479	-0.713114		0.319479	-0.536933
0.322373	12.8056		0.322373	9.36034		0.322373	-1.68275		0.322373	-0.959431		0.322373	-0.68269		0.322373	-0.513793
0.325267	12.7962		0.325267	9.32993		0.325267	-1.63561		0.325267	-0.920573		0.325267	-0.652876		0.325267	-0.491158
0.328161	12.7858		0.328161	9.29907		0.328161	-1.58824		0.328161	-0.882321		0.328161	-0.623675		0.328161	-0.469023
0.331055	12.7747		0.331055	9.26778		0.331055	-1.54072		0.331055	-0.844691		0.331055	-0.595087		0.331055	-0.447383
0.333949	12.7632		0.333949	9.23607		0.333949	-1.49313		0.333949	-0.807696		0.333949	-0.567113		0.333949	-0.42623
0.336842	12.7512		0.336842	9.20401		0.336842	-1.44555		0.336842	-0.771348		0.336842	-0.539751		0.336842	-0.405557
0.339736	12.7384		0.339736	9.17164		0.339736	-1.39804		0.339736	-0.735658		0.339736	-0.512999		0.339736	-0.385356
0.34263	12.7247		0.34263	9.13909		0.34263	-1.35068		0.34263	-0.700633		0.34263	-0.486851		0.34263	-0.365618
0.345524	12.7104		0.345524	9.10647		0.345524	-1.30353		0.345524	-0.666281		0.345524	-0.461305		0.345524	-0.346333
0.348418	12.6956		0.348418	9.07371		0.348418	-1.25664		0.348418	-0.632606		0.348418	-0.436353		0.348418	-0.327491
0.351312	12.6804		0.351312	9.04082		0.351312	-1.21007		0.351312	-0.599611		0.351312	-0.411989		0.351312	-0.309082
0.354206	12.6648		0.354206	9.00783		0.354206	-1.16387		0.354206	-0.5673		0.354206	-0.388206		0.354206	-0.291096
0.3571	12.6484		0.3571	8.97442		0.3571	-1.11808		0.3571	-0.535672		0.3571	-0.364994		0.3571	-0.273521
0.359994	12.6314		0.359994	8.94036		0.359994	-1.07275		0.359994	-0.504727		0.359994	-0.342346		0.359994	-0.256347
0.362887	12.6132		0.362887	8.90575		0.362887	-1.02791		0.362887	-0.474463		0.362887	-0.320251		0.362887	-0.239562
0.365781	12.5935		0.365781	8.87062		0.365781	-0.983599		0.365781	-0.444878		0.365781	-0.298698		0.365781	-0.223155
0.368675	12.5726		0.368675	8.8349		0.368675	-0.939848		0.368675	-0.415967		0.368675	-0.277677		0.368675	-0.207113
0.371569	12.551		0.371569	8.79871		0.371569	-0.896685		0.371569	-0.387725		0.371569	-0.257177		0.371569	-0.191425
0.374463	12.5285		0.374463	8.76227		0.374463	-0.854135		0.374463	-0.360145		0.374463	-0.237183		0.374463	-0.176079
0.377357	12.5047		0.377357	8.72543		0.377357	-0.81222		0.377357	-0.333222		0.377357	-0.217687		0.377357	-0.161064
0.380251	12.4792		0.380251	8.68775		0.380251	-0.770963		0.380251	-0.306949		0.380251	-0.198675		0.380251	-0.146369
0.383145	12.452		0.383145	8.64911		0.383145	-0.730381		0.383145	-0.281318		0.383145	-0.180136		0.383145	-0.131982
0.386039	12.4233		0.386039	8.60987		0.386039	-0.690487		0.386039	-0.25632		0.386039	-0.162057		0.386039	-0.117894
0.388932	12.3932		0.388932	8.57029		0.388932	-0.651294		0.388932	-0.231945		0.388932	-0.144425		0.388932	-0.104093
0.391826	12.3616		0.391826	8.53047		0.391826	-0.612814		0.391826	-0.208182		0.391826	-0.127227		0.391826	-0.0905681
0.39472	12.3279		0.39472	8.49005		0.39472	-0.575053		0.39472	-0.185022		0.39472	-0.11045		0.39472	-0.0773083
0.397614	12.2916		0.397614	8.44845		0.397614	-0.53802		0.397614	-0.162454		0.397614	-0.0940821		0.397614	-0.0643036
0.400508	12.2531		0.400508	8.40568		0.400508	-0.501719		0.400508	-0.140465		0.400508	-0.078109		0.400508	-0.0515441
0.403402	12.2123		0.403402	8.36222		0.403402	-0.466154		0.403402	-0.119044		0.403402	-0.0625186		0.403402	-0.0390198
0.403402	12.2123		0.403402	8.36222		0.403402	-0.466154		0.403402	-0.119044		0.403402	-0.0625186		0.403402	-0.0390198
0.406296	12.1693		0.406296	8.31837		0.406296	-0.431326		0.406296	-0.0981785		0.406296	-0.0472981		0.406296	-0.0267215
0.40919	12.124		0.40919	8.27407		0.40919	-0.397236		0.40919	-0.0778568		0.40919	-0.032435		0.40919	-0.0146397
0.412084	12.0765		0.412084	8.22906		0.412084	-0.363883		0.412084	-0.058066		0.412084	-0.0179168		0.412084	-0.0027657
0.414977	12.0268		0.414977	8.18312		0.414977	-0.331264		0.414977	-0.0387933		0.414977	-0.00373129		0.414977	0.00890925
0.417871	11.9749		0.417871	8.13634		0.417871	-0.299377		0.417871	-0.0200256		0.417871	0.0101336		0.417871	0.0203935
0.420765	11.9208		0.420765	8.08904		0.420765	-0.268217		0.420765	-0.00175001		0.420765	0.0236897		0.420765	0.0316951
0.423659	11.8639		0.423659	8.04156		0.423659	-0.237778		0.423659	0.0160467		0.423659	0.0369488		0.423659	0.0428218
0.426553	11.804		0.426553	7.99354		0.426553	-0.208054		0.426553	0.0333776		0.426553	0.0499221		0.426553	0.0537811
0.429447	11.7415		0.429447	7.94446		0.429447	-0.179037		0.429447	0.050256		0.429447	0.0626208		0.429447	0.0645802
0.432341	11.677		0.432341	7.89453		0.432341	-0.150721		0.432341	0.066695		0.432341	0.0750557		0.432341	0.075226
0.435235	11.6108		0.435235	7.84379		0.435235	-0.123097		0.435235	0.0827078		0.435235	0.0872376		0.435235	0.0857252
0.438129	11.5422		0.438129	7.79129		0.438129	-0.0961539		0.438129	0.0983072		0.438129	0.0991766		0.438129	0.0960841
0.441023	11.4708		0.441023	7.73597		0.441023	-0.0698834		0.441023	0.113506		0.441023	0.110883		0.441023	0.106309
0.443916	11.397		0.443916	7.6783		0.443916	-0.0442748		0.443916	0.128318		0.443916	0.122366		0.443916	0.116405
0.44681	11.3214		0.44681	7.61978		0.44681	-0.0193171		0.44681	0.142754		0.44681	0.133636		0.44681	0.126379
0.449704	11.2429		0.449704	7.56072		0.449704	0.00500093		0.449704	0.156829		0.449704	0.144701		0.449704	0.136236
0.452598	11.1604		0.452598	7.50053		0.452598	0.0286911		0.452598	0.170553		0.452598	0.155571		0.452598	0.14598
0.455492	11.0737		0.455492	7.43925		0.455492	0.0517654		0.455492	0.18394		0.455492	0.166254		0.455492	0.155618
0.458386	10.9827		0.458386	7.37754		0.458386	0.0742361		0.458386	0.197001		0.458386	0.176759		0.458386	0.165153
0.46128	10.8885		0.46128	7.31562		0.46128	0.0961156		0.46128	0.209748		0.46128	0.187093		0.46128	0.17459
0.464174	10.7927		0.464174	7.25317		0.464174	0.117417		0.464174	0.222192		0.464174	0.197265		0.464174	0.183935
0.467068	10.6956		0.467068	7.19023		0.467068	0.138152		0.467068	0.234345		0.467068	0.207281		0.467068	0.19319
0.469961	10.5963		0.469961	7.12714		0.469961	0.158335		0.469961	0.246218		0.469961	0.21715		0.469961	0.202359
0.472855	10.4955		0.472855	7.06397		0.472855	0.177979		0.472855	0.257822		0.472855	0.226878		0.472855	0.211448
0.475749	10.3938		0.475749	7.00073		0.475749	0.197096		0.475749	0.269167		0.475749	0.236472		0.475749	0.220459
0.478643	10.2908		0.478643	6.93746		0.478643	0.215701		0.478643	0.280264		0.478643	0.245938		0.478643	0.229397
0.481537	10.187		0.481537	6.87408		0.481537	0.233805		0.481537	0.291122		0.481537	0.255284		0.481537	0.238264
0.484431	10.0828		0.484431	6.81044		0.484431	0.251423		0.484431	0.301752		0.484431	0.264514		0.484431	0.247064
0.487325	9.97812		0.487325	6.74644		0.487325	0.268567		0.487325	0.312163		0.487325	0.273635		0.487325	0.255801
0.490219	9.87325		0.490219	6.68206		0.490219	0.285251		0.490219	0.322365		0.490219	0.282652		0.490219	0.264477
0.493113	9.76837		0.493113	6.61741		0.493113	0.301487		0.493113	0.332366		0.493113	0.291572		0.493113	0.273096
0.496006	9.66303		0.496006	6.55266		0.496006	0.31729		0.496006	0.342175		0.496006	0.300399		0.496006	0.281661
0.4989	9.55757		0.4989	6.48795		0.4989	0.33267		0.4989	0.351802		0.4989	0.309138		0.4989	0.290175
0.501794	9.45254		0.501794	6.42337		0.501794	0.347642		0.501794	0.361253		0.501794	0.317794		0.501794	0.29864
0.504688	9.34803		0.504688	6.35885		0.504688	0.362218		0.504688	0.370539		0.504688	0.326373		0.504688	0.30706
0.507582	9.24398		0.507582	6.29424		0.507582	0.37641		0.507582	0.379665		0.507582	0.334879		0.507582	0.315438
0.510476	9.14031		0.510476	6.22962		0.510476	0.390231		0.510476	0.388641		0.510476	0.343316		0.510476	0.323776
0.51337	9.03696		0.51337	6.16518		0.51337	0.403692		0.51337	0.397474		0.51337	0.351689		0.51337	0.332077
0.516264	8.93378		0.516264	6.10091		0.516264	0.416806		0.516264	0.40617		0.516264	0.360002		0.516264	0.340345
0.519158	8.8309		0.519158	6.03672		0.519158	0.429586		0.519158	0.414739		0.519158	0.368261		0.519158	0.348582
0.522051	8.72844		0.522051	5.97256		0.522051	0.442042		0.522051	0.423187		0.522051	0.37647		0.522051	0.356792
0.524945	8.62621		0.524945	5.90846		0.524945	0.454186		0.524945	0.43152		0.524945	0.384632		0.524945	0.364976
0.524945	8.62621		0.524945	5.90846		0.524945	0.454186		0.524945	0.43152		0.524945	0.384632		0.524945	0.364976
0.527839	8.52418		0.527839	5.84446		0.527839	0.466029		0.527839	0.439744		0.527839	0.392751		0.527839	0.373139
0.530733	8.42256		0.530733	5.7806		0.530733	0.477582		0.530733	0.447866		0.530733	0.400831		0.530733	0.381282
0.533627	8.32148		0.533627	5.7169		0.533627	0.488855		0.533627	0.455893		0.533627	0.408877		0.533627	0.389409
0.536521	8.22093		0.536521	5.6534		0.536521	0.49986		0.536521	0.463831		0.536521	0.416891		0.536521	0.397522
0.539415	8.1209		0.539415	5.59016		0.539415	0.510607		0.539415	0.471685		0.539415	0.424879		0.539415	0.405626
0.542309	8.02151		0.542309	5.52721		0.542309	0.521107		0.542309	0.479462		0.542309	0.432844		0.542309	0.413724
0.545203	7.92286		0.545203	5.46457		0.545203	0.531369		0.545203	0.487168		0.545203	0.44079		0.545203	0.421818
0.548096	7.82495		0.548096	5.4023		0.548096	0.541404		0.548096	0.494809		0.548096	0.448721		0.548096	0.429912
0.55099	7.72788		0.55099	5.34044		0.55099	0.551221		0.55099	0.50239		0.55099	0.456641		0.55099	0.438009
0.553884	7.63168		0.553884	5.279		0.553884	0.56083		0.553884	0.509917		0.553884	0.464554		0.553884	0.446113
0.556778	7.53624		0.556778	5.21799		0.556778	0.57024		0.556778	0.517396		0.556778	0.472465		0.556778	0.454228
0.559672	7.44164		0.559672	5.15749		0.559672	0.579461		0.559672	0.524832		0.559672	0.480377		0.559672	0.462357
0.562566	7.34795		0.562566	5.09756		0.562566	0.588502		0.562566	0.532231		0.562566	0.488294		0.562566	0.470504
0.56546	7.2551		0.56546	5.03817		0.56546	0.597373		0.56546	0.539597		0.56546	0.496221		0.56546	0.478673
0.568354	7.16306		0.568354	4.97928		0.568354	0.606081		0.568354	0.546938		0.568354	0.504162		0.568354	0.486869
0.571248	7.072		0.571248	4.92097		0.571248	0.614636		0.571248	0.554257		0.571248	0.512122		0.571248	0.495095
0.574142	6.98191		0.574142	4.86327		0.574142	0.623047		0.574142	0.561562		0.574142	0.520105		0.574142	0.503355
0.577035	6.89269		0.577035	4.80614		0.577035	0.631322		0.577035	0.568857		0.577035	0.528115		0.577035	0.511654
0.579929	6.80437		0.579929	4.74955		0.579929	0.639469		0.579929	0.576148		0.579929	0.536158		0.579929	0.519997
0.582823	6.71708		0.582823	4.69349		0.582823	0.647498		0.582823	0.583441		0.582823	0.544238		0.582823	0.528388
0.585717	6.63082		0.585717	4.63804		0.585717	0.655417		0.585717	0.590741		0.585717	0.552361		0.585717	0.536832
0.588611	6.54542		0.588611	4.58325		0.588611	0.663233		0.588611	0.598054		0.588611	0.56053		0.588611	0.545336
0.591505	6.4608		0.591505	4.52911		0.591505	0.670956		0.591505	0.605386		0.591505	0.568753		0.591505	0.553904
0.594399	6.37711		0.594399	4.47556		0.594399	0.678594		0.594399	0.612744		0.594399	0.577034		0.594399	0.562544
0.597293	6.29452		0.597293	4.42258		0.597293	0.686156		0.597293	0.620134		0.597293	0.585378		0.597293	0.571263
0.600186	6.21298		0.600186	4.3702		0.600186	0.693648		0.600186	0.627561		0.600186	0.593792		0.600186	0.580067
0.60308	6.13239		0.60308	4.31849		0.60308	0.701082		0.60308	0.635032		0.60308	0.602283		0.60308	0.588961
0.605974	6.05264		0.605974	4.26749		0.605974	0.708463		0.605974	0.642555		0.605974	0.610858		0.605974	0.597949
0.608868	5.97368		0.608868	4.21715		0.608868	0.715802		0.608868	0.650135		0.608868	0.619525		0.608868	0.607036
0.611762	5.89567		0.611762	4.16745		0.611762	0.723107		0.611762	0.65778		0.611762	0.628291		0.611762	0.616227
0.614656	5.81874		0.614656	4.11838		0.614656	0.730387		0.614656	0.665497		0.614656	0.637164		0.614656	0.62553
0.61755	5.74285		0.61755	4.06992		0.61755	0.737651		0.61755	0.673294		0.61755	0.646151		0.61755	0.634954
0.620444	5.66792		0.620444	4.02204		0.620444	0.744907		0.620444	0.68118		0.620444	0.655256		0.620444	0.644507
0.623338	5.59391		0.623338	3.97479		0.623338	0.752165		0.623338	0.689163		0.623338	0.664486		0.623338	0.654198
0.626231	5.52072		0.626231	3.92823		0.626231	0.759435		0.626231	0.697253		0.626231	0.673847		0.626231	0.664036
0.629125	5.4483		0.629125	3.88239		0.629125	0.766728		0.629125	0.705461		0.629125	0.683351		0.629125	0.674029
0.632019	5.37672		0.632019	3.83722		0.632019	0.774054		0.632019	0.713793		0.632019	0.693007		0.632019	0.684187
0.634913	5.30611		0.634913	3.79271		0.634913	0.781425		0.634913	0.722259		0.634913	0.702827		0.634913	0.694518
0.637807	5.2365		0.637807	3.74883		0.637807	0.788852		0.637807	0.730867		0.637807	0.71282		0.637807	0.705033
0.640701	5.16783		0.640701	3.70556		0.640701	0.796345		0.640701	0.739626		0.640701	0.722998		0.640701	0.715741
0.643595	5.10004		0.643595	3.66288		0.643595	0.803914		0.643595	0.748546		0.643595	0.733372		0.643595	0.726652
0.643595	5.10004		0.643595	3.66288		0.643595	0.803914		0.643595	0.748546		0.643595	0.733372		0.643595	0.726652
0.646489	5.03314		0.646489	3.62081		0.646489	0.81157		0.646489	0.757642		0.646489	0.743952		0.646489	0.737779
0.649383	4.9672		0.649383	3.57938		0.649383	0.819324		0.649383	0.766925		0.649383	0.754751		0.649383	0.749132
0.652277	4.90222		0.652277	3.53861		0.652277	0.82719		0.652277	0.77641		0.652277	0.765781		0.652277	0.760724
0.65517	4.83818		0.65517	3.49852		0.65517	0.835184		0.65517	0.786111		0.65517	0.777056		0.65517	0.772566
0.658064	4.77509		0.658064	3.4591		0.658064	0.843319		0.658064	0.79604		0.658064	0.788589		0.658064	0.784673
0.660958	4.71294		0.660958	3.42036		0.660958	0.851613		0.660958	0.806214		0.660958	0.800394		0.660958	0.797057
0.663852	4.65172		0.663852	3.38229		0.663852	0.860081		0.663852	0.816648		0.663852	0.812488		0.663852	0.809734
0.666746	4.59143		0.666746	3.34489		0.666746	0.868739		0.666746	0.827358		0.666746	0.824886		0.666746	0.822717
0.66964	4.53207		0.66964	3.30817		0.66964	0.877606		0.66964	0.838362		0.66964	0.837606		0.66964	0.836024
0.672534	4.47365		0.672534	3.27213		0.672534	0.886699		0.672534	0.849678		0.672534	0.850664		0.672534	0.84967
0.675428	4.41616		0.675428	3.23678		0.675428	0.896039		0.675428	0.861325		0.675428	0.86408		0.675428	0.863672
0.678322	4.3596		0.678322	3.2021		0.678322	0.905646		0.678322	0.873325		0.678322	0.877873		0.678322	0.87805
0.681215	4.30398		0.681215	3.16812		0.681215	0.915543		0.681215	0.885699		0.681215	0.892064		0.681215	0.892822
0.684109	4.2493		0.684109	3.13483		0.684109	0.925752		0.684109	0.898469		0.684109	0.906676		0.684109	0.908009
0.687003	4.19555		0.687003	3.10226		0.687003	0.936299		0.687003	0.911662		0.687003	0.92173		0.687003	0.923631
0.689897	4.14276		0.689897	3.07041		0.689897	0.94721		0.689897	0.925302		0.689897	0.937253		0.689897	0.939712
0.692791	4.09091		0.692791	3.0393		0.692791	0.958515		0.692791	0.939417		0.692791	0.953271		0.692791	0.956276
0.695685	4.04002		0.695685	3.00894		0.695685	0.970242		0.695685	0.954038		0.695685	0.96981		0.695685	0.973347
0.698579	3.9901		0.698579	2.97933		0.698579	0.982424		0.698579	0.969194		0.698579	0.9869		0.698579	0.990952
0.701473	3.94118		0.701473	2.95051		0.701473	0.995097		0.701473	0.984921		0.701473	1.00457		0.701473	1.00912
0.704367	3.89325		0.704367	2.92248		0.704367	1.0083		0.704367	1.00125		0.704367	1.02286		0.704367	1.02788
0.70726	3.84635		0.70726	2.89528		0.70726	1.02206		0.70726	1.01823		0.70726	1.0418		0.70726	1.04726
0.710154	3.80049		0.710154	2.86891		0.710154	1.03644		0.710154	1.03589		0.710154	1.06143		0.710154	1.06731
0.713048	3.75571		0.713048	2.8434		0.713048	1.05147		0.713048	1.05428		0.713048	1.08178		0.713048	1.08804
0.715942	3.71204		0.715942	2.81878		0.715942	1.0672		0.715942	1.07344		0.715942	1.10291		0.715942	1.10952
0.715942	3.71204		0.715942	2.81878		0.715942	1.0672		0.715942	1.07344		0.715942	1.10291		0.715942	1.10952
0.718836	3.66952		0.718836	2.79511		0.718836	1.08369		0.718836	1.09343		0.718836	1.12486		0.718836	1.13176
0.72173	3.62818		0.72173	2.77242		0.72173	1.101		0.72173	1.11429		0.72173	1.14767		0.72173	1.15483
0.724624	3.58808		0.724624	2.75077		0.724624	1.11918		0.724624	1.1361		0.724624	1.1714		0.724624	1.17876
0.727518	3.54925		0.727518	2.73019		0.727518	1.1383		0.727518	1.1589		0.727518	1.19612		0.727518	1.20362
0.730412	3.51172		0.730412	2.71076		0.730412	1.15844		0.730412	1.18278		0.730412	1.22187		0.730412	1.22944
0.733305	3.47561		0.733305	2.69253		0.733305	1.17968		0.733305	1.20779		0.733305	1.24873		0.733305	1.2563
0.736199	3.441		0.736199	2.67559		0.736199	1.20209		0.736199	1.23402		0.736199	1.27676		0.736199	1.28426
0.739093	3.40796		0.739093	2.66002		0.739093	1.22577		0.739093	1.26156		0.739093	1.30605		0.739093	1.31339
0.741987	3.37658		0.741987	2.64592		0.741987	1.25082		0.741987	1.2905		0.741987	1.33669		0.741987	1.34376
0.744881	3.34697		0.744881	2.63339		0.744881	1.27736		0.744881	1.32094		0.744881	1.36876		0.744881	1.37546
0.747775	3.31925		0.747775	2.62256		0.747775	1.3055		0.747775	1.35299		0.747775	1.40236		0.747775	1.40858
0.750669	3.29356		0.750669	2.61356		0.750669	1.33537		0.750669	1.38678		0.750669	1.43761		0.750669	1.44322
0.753563	3.27007		0.753563	2.60654		0.753563	1.36712		0.753563	1.42244		0.753563	1.47464		0.753563	1.47949
0.756457	3.24894		0.756457	2.60169		0.756457	1.40091		0.756457	1.46011		0.756457	1.51356		0.756457	1.5175
0.75935	3.2304		0.75935	2.59923		0.75935	1.4369		0.75935	1.49997		0.75935	1.55453		0.75935	1.5574
0.762244	3.21468		0.762244	2.5994		0.762244	1.47531		0.762244	1.54218		0.762244	1.59772		0.762244	1.59931
0.765138	3.20204		0.765138	2.60244		0.765138	1.51634		0.765138	1.58695		0.765138	1.6433		0.765138	1.64341
0.768032	3.19277		0.768032	2.60867		0.768032	1.56023		0.768032	1.6345		0.768032	1.69146		0.768032	1.68987
0.770926	3.18724		0.770926	2.61844		0.770926	1.60725		0.770926	1.68508		0.770926	1.74244		0.770926	1.73888
0.77382	3.18592		0.77382	2.63214		0.77382	1.65769		0.77382	1.73894		0.77382	1.79646		0.77382	1.79065
0.776714	3.18922		0.776714	2.65023		0.776714	1.7119		0.776714	1.7964		0.776714	1.8538		0.776714	1.84543
0.779608	3.19763		0.779608	2.67321		0.779608	1.77024		0.779608	1.85777		0.779608	1.91473		0.779608	1.90346
0.782502	3.21176		0.782502	2.70166		0.782502	1.83311		0.782502	1.92342		0.782502	1.97958		0.782502	1.96502
0.785396	3.23229		0.785396	2.73624		0.785396	1.90099		0.785396	1.99376		0.785396	2.0487		0.785396	2.03044
0.788289	3.25996		0.788289	2.77765		0.788289	1.97439		0.788289	2.06922		0.788289	2.12248		0.788289	2.10006
0.791183	3.2956		0.791183	2.82665		0.791183	2.05388		0.791183	2.15032		0.791183	2.20136		0.791183	2.17427
0.794077	3.3401		0.794077	2.88407		0.794077	2.14011		0.794077	2.23758		0.794077	2.28582		0.794077	2.25349
0.796971	3.39442		0.796971	2.9508		0.796971	2.23378		0.796971	2.33163		0.796971	2.37639		0.796971	2.33819
0.799865	3.45958		0.799865	3.02778		0.799865	2.33569		0.799865	2.43315		0.799865	2.47367		0.799865	2.42892
0.799865	3.45958		0.799865	3.02778		0.799865	2.33569		0.799865	2.43315		0.799865	2.47367		0.799865	2.42892
0.802759	3.53669		0.802759	3.11605		0.802759	2.44674		0.802759	2.54291		0.802759	2.57832		0.802759	2.52627
0.805653	3.62694		0.805653	3.21674		0.805653	2.56793		0.805653	2.66177		0.805653	2.69112		0.805653	2.6309
0.808547	3.73162		0.808547	3.3311		0.808547	2.7004		0.808547	2.7907		0.808547	2.8129		0.808547	2.74358
0.811441	3.85213		0.811441	3.46055		0.811441	2.84543		0.811441	2.9308		0.811441	2.94461		0.811441	2.86514
0.814334	3.99005		0.814334	3.60667		0.814334	3.00444		0.814334	3.08328		0.814334	3.08733		0.814334	2.99653
0.817228	4.14714		0.817228	3.77126		0.817228	3.17904		0.817228	3.24953		0.817228	3.24224		0.817228	3.13879
0.820122	4.3254		0.820122	3.95637		0.820122	3.37104		0.820122	3.43106		0.820122	3.41066		0.820122	3.29311
0.823016	4.52705		0.823016	4.16429		0.823016	3.58243		0.823016	3.62957		0.823016	3.59406		0.823016	3.46075
0.82591	4.75459		0.82591	4.39757		0.82591	3.81542		0.82591	3.84691		0.82591	3.79404		0.82591	3.64314
0.828804	5.01078		0.828804	4.65903		0.828804	4.07243		0.828804	4.08513		0.828804	4.01233		0.828804	3.8418
0.831698	5.29862		0.831698	4.95174		0.831698	4.35609		0.831698	4.3464		0.831698	4.2508		0.831698	4.05835
0.834592	5.62131		0.834592	5.27894		0.834592	4.66919		0.834592	4.63303		0.834592	4.51142		0.834592	4.2945
0.837486	5.9822		0.837486	5.64405		0.837486	5.01468		0.837486	4.94744		0.837486	4.79619		0.837486	4.55199
0.840379	6.38464		0.840379	6.05052		0.840379	5.39555		0.840379	5.29202		0.840379	5.1071		0.840379	4.83252
0.843273	6.8319		0.843273	6.50171		0.843273	5.81477		0.843273	5.6691		0.843273	5.44604		0.843273	5.13769
0.846167	7.3269		0.846167	7.00071		0.846167	6.27508		0.846167	6.08076		0.846167	5.81464		0.846167	5.46883
0.849061	7.87203		0.849061	7.55011		0.849061	6.77881		0.849061	6.52863		0.849061	6.2141		0.849061	5.82689
0.851955	8.46888		0.851955	8.15171		0.851955	7.32764		0.851955	7.01375		0.851955	6.64502		0.851955	6.21224
0.854849	9.1178		0.854849	8.80615		0.854849	7.92222		0.854849	7.53612		0.854849	7.1071		0.854849	6.62443
0.857743	9.81793		0.857743	9.51289		0.857743	8.56216		0.857743	8.0948		0.857743	7.59911		0.857743	7.06216
0.860637	10.5661		0.860637	10.2691		0.860637	9.24484		0.860637	8.6869		0.860637	8.11811		0.860637	7.52259
0.863531	11.3592		0.863531	11.0718		0.863531	9.9678		0.863531	9.30949		0.863531	8.66108		0.863531	8.00279
0.866424	12.1874		0.866424	11.9115		0.866424	10.7217		0.866424	9.954		0.866424	9.22023		0.866424	8.49569
0.869318	13.0547		0.869318	12.7928		0.869318	11.5113		0.869318	10.6236		0.869318	9.79768		0.869318	9.00283
0.872212	13.928		0.872212	13.681		0.872212	12.3022		0.872212	11.2896		0.872212	10.3692		0.872212	9.50317
0.875106	14.8988		0.875106	14.6721		0.875106	13.1851		0.875106	12.027		0.875106	10.9983		0.875106	10.052
0.878	15.443		0.878	15.2297		0.878	13.6843		0.878	12.4422		0.878	11.3514		0.878	10.3595

## Sheet: Radial temp distribution
SN 0			SN 0.2			SN 0.4			SN 0.6			SN 0.8			SN 1
Radial distance	temperature		Radial distance	temperature		Radial distance	temperature		Radial distance	temperature		Radial distance	temperature		Radial distance	temperature
0	981.334		0	993.168		0	970.023		0	982.647		0	1004.77		0	1025.09
0.005	980.776		0.005	992.433		0.005	969.195		0.005	981.803		0.005	1003.9		0.005	1024.18
0.01	979.139		0.01	990.28		0.01	966.739		0.01	979.302		0.01	1001.32		0.01	1021.48
0.015	976.413		0.015	986.704		0.015	962.565		0.015	975.061		0.015	996.953		0.015	1016.92
0.02	972.553		0.02	981.66		0.02	956.472		0.02	968.893		0.02	990.624		0.02	1010.34
0.025	967.521		0.025	975.13		0.025	948.262		0.025	960.61		0.025	982.156		0.025	1001.56
0.03	961.175		0.03	966.982		0.03	937.613		0.03	949.906		0.03	971.245		0.03	990.283
0.035	953.019		0.035	956.691		0.035	923.755		0.035	936.043		0.035	957.152		0.035	975.773
0.04	940.075		0.04	940.953		0.04	902.674		0.04	915.141		0.04	936.009		0.04	954.055
0.045	791.382		0.045	787.329		0.045	755.216		0.045	762.328		0.045	773.466		0.045	781.748

## Sheet: n2o distribution
SN 0			SN 0.2			SN 0.4			SN 0.6			SN 0.8			SN 1
Axial distance	n2o mass fraction		Axial distance	n2o mass fraction		Axial distance	n2o mass fraction		Axial distance	n2o mass fraction		Axial distance	n2o mass fraction		Axial distance	n2o mass fraction
0.00115113	1.09133e-10		0.00115113	1.07394e-10		0.00115113	1.12487e-10		0.00115113	2.62716e-11		0.00115113	8.86316e-12		0.00115113	8.66862e-12
0.00404502	1.46032e-10		0.00404502	1.44348e-10		0.00404502	1.45804e-10		0.00404502	3.01608e-11		0.00404502	9.88971e-12		0.00404502	9.30012e-12
0.00693891	1.90028e-10		0.00693891	1.8917e-10		0.00693891	1.77817e-10		0.00693891	3.42857e-11		0.00693891	1.07348e-11		0.00693891	9.5923e-12
0.0098328	2.4131e-10		0.0098328	2.4175e-10		0.0098328	2.05451e-10		0.0098328	3.8733e-11		0.0098328	1.14714e-11		0.0098328	9.61049e-12
0.0127267	2.9959e-10		0.0127267	3.0077e-10		0.0127267	2.2629e-10		0.0127267	4.31967e-11		0.0127267	1.21517e-11		0.0127267	9.41822e-12
0.0156206	3.65796e-10		0.0156206	3.66392e-10		0.0156206	2.39801e-10		0.0156206	4.68769e-11		0.0156206	1.2729e-11		0.0156206	9.07887e-12
0.0185145	4.37748e-10		0.0185145	4.34739e-10		0.0185145	2.46852e-10		0.0185145	4.93959e-11		0.0185145	1.31927e-11		0.0185145	8.63695e-12
0.0214084	5.10613e-10		0.0214084	4.98548e-10		0.0214084	2.48882e-10		0.0214084	5.07381e-11		0.0214084	1.35322e-11		0.0214084	8.09323e-12
0.0243023	5.83211e-10		0.0243023	5.53534e-10		0.0243023	2.48474e-10		0.0243023	5.09914e-11		0.0243023	1.36176e-11		0.0243023	7.4556e-12
0.0271961	6.50926e-10		0.0271961	5.97272e-10		0.0271961	2.47833e-10		0.0271961	5.02349e-11		0.0271961	1.33625e-11		0.0271961	6.77742e-12
0.03009	7.07477e-10		0.03009	6.28684e-10		0.03009	2.47822e-10		0.03009	4.88239e-11		0.03009	1.27455e-11		0.03009	6.14351e-12
0.0329839	7.51043e-10		0.0329839	6.47562e-10		0.0329839	2.48323e-10		0.0329839	4.68974e-11		0.0329839	1.19419e-11		0.0329839	5.61782e-12
0.0358778	7.81423e-10		0.0358778	6.54842e-10		0.0358778	2.4885e-10		0.0358778	4.44217e-11		0.0358778	1.10917e-11		0.0358778	5.24363e-12
0.0387717	7.99229e-10		0.0387717	6.52371e-10		0.0387717	2.48994e-10		0.0387717	4.16687e-11		0.0387717	1.02796e-11		0.0387717	5.08322e-12
0.0416656	8.05627e-10		0.0416656	6.42267e-10		0.0416656	2.48661e-10		0.0416656	3.89367e-11		0.0416656	9.65243e-12		0.0416656	5.19579e-12
0.0445595	8.02371e-10		0.0445595	6.26656e-10		0.0445595	2.47921e-10		0.0445595	3.639e-11		0.0445595	9.35265e-12		0.0445595	5.62341e-12
0.0474534	7.91489e-10		0.0474534	6.07706e-10		0.0474534	2.46879e-10		0.0474534	3.40777e-11		0.0474534	9.55442e-12		0.0474534	6.40362e-12
0.0503473	7.74826e-10		0.0503473	5.87634e-10		0.0503473	2.45583e-10		0.0503473	3.21445e-11		0.0503473	1.04919e-11		0.0503473	7.57916e-12
0.0532412	7.54078e-10		0.0532412	5.68522e-10		0.0532412	2.44e-10		0.0532412	3.08447e-11		0.0532412	1.24834e-11		0.0532412	9.18639e-12
0.056135	7.30838e-10		0.056135	5.52264e-10		0.056135	2.42183e-10		0.056135	3.08333e-11		0.056135	1.60978e-11		0.056135	1.12657e-11
0.0590289	7.06605e-10		0.0590289	5.40427e-10		0.0590289	2.40698e-10		0.0590289	3.42884e-11		0.0590289	2.25472e-11		0.0590289	1.38667e-11
0.0619228	6.82798e-10		0.0619228	5.34082e-10		0.0619228	2.39367e-10		0.0619228	4.68899e-11		0.0619228	3.46594e-11		0.0619228	1.70787e-11
0.0648167	6.60721e-10		0.0648167	5.33543e-10		0.0648167	2.37539e-10		0.0648167	8.17671e-11		0.0648167	5.95561e-11		0.0648167	2.11603e-11
0.0677106	6.41532e-10		0.0677106	5.38514e-10		0.0677106	2.35601e-10		0.0677106	1.70049e-10		0.0677106	1.11762e-10		0.0677106	2.6825e-11
0.0706045	6.26179e-10		0.0706045	5.48552e-10		0.0706045	2.33398e-10		0.0706045	3.63216e-10		0.0706045	2.24216e-10		0.0706045	3.58634e-11
0.0734984	6.15355e-10		0.0734984	5.63033e-10		0.0734984	2.30513e-10		0.0734984	7.39957e-10		0.0734984	4.54551e-10		0.0734984	5.25617e-11
0.0763923	6.09489e-10		0.0763923	5.81023e-10		0.0763923	2.27433e-10		0.0763923	1.41251e-09		0.0763923	8.78076e-10		0.0763923	8.6364e-11
0.0792862	6.08733e-10		0.0792862	6.01416e-10		0.0792862	2.24083e-10		0.0792862	2.64819e-09		0.0792862	1.64263e-09		0.0792862	1.55321e-10
0.0821801	6.1288e-10		0.0821801	6.23067e-10		0.0821801	2.20094e-10		0.0821801	4.85813e-09		0.0821801	3.0023e-09		0.0821801	2.92448e-10
0.085074	6.21659e-10		0.085074	6.44892e-10		0.085074	2.15855e-10		0.085074	8.41909e-09		0.085074	5.28997e-09		0.085074	5.56799e-10
0.085074	6.21659e-10		0.085074	6.44892e-10		0.085074	2.15855e-10		0.085074	8.41909e-09		0.085074	5.28997e-09		0.085074	5.56799e-10
0.0879678	6.34869e-10		0.0879678	6.65984e-10		0.0879678	2.11403e-10		0.0879678	1.34965e-08		0.0879678	8.83795e-09		0.0879678	1.04543e-09
0.0908617	6.52228e-10		0.0908617	6.85631e-10		0.0908617	2.06704e-10		0.0908617	1.97841e-08		0.0908617	1.37693e-08		0.0908617	1.90251e-09
0.0937556	6.73703e-10		0.0937556	7.03263e-10		0.0937556	2.01868e-10		0.0937556	2.65262e-08		0.0937556	1.97684e-08		0.0937556	3.32777e-09
0.0966495	6.98364e-10		0.0966495	7.18511e-10		0.0966495	1.96879e-10		0.0966495	3.26835e-08		0.0966495	2.60654e-08		0.0966495	5.568e-09
0.0995434	7.25103e-10		0.0995434	7.31305e-10		0.0995434	1.91988e-10		0.0995434	3.49443e-08		0.0995434	3.13212e-08		0.0995434	8.86094e-09
0.102437	7.53532e-10		0.102437	7.41727e-10		0.102437	1.89123e-10		0.102437	3.27405e-08		0.102437	3.26798e-08		0.102437	1.33265e-08
0.105331	7.82905e-10		0.105331	7.49929e-10		0.105331	1.94551e-10		0.105331	2.9278e-08		0.105331	3.02601e-08		0.105331	1.885e-08
0.108225	8.12454e-10		0.108225	7.56205e-10		0.108225	2.23837e-10		0.108225	2.58223e-08		0.108225	2.70853e-08		0.108225	2.50627e-08
0.111119	8.41506e-10		0.111119	7.61026e-10		0.111119	3.11805e-10		0.111119	2.27477e-08		0.111119	2.42119e-08		0.111119	3.13165e-08
0.114013	8.69872e-10		0.114013	7.64789e-10		0.114013	5.28293e-10		0.114013	2.01919e-08		0.114013	2.17983e-08		0.114013	3.46862e-08
0.116907	8.96602e-10		0.116907	7.67944e-10		0.116907	9.82634e-10		0.116907	1.80606e-08		0.116907	1.98382e-08		0.116907	3.39811e-08
0.119801	9.21195e-10		0.119801	7.71027e-10		0.119801	1.82825e-09		0.119801	1.62648e-08		0.119801	1.8274e-08		0.119801	3.16137e-08
0.122695	9.43434e-10		0.122695	7.74509e-10		0.122695	3.2282e-09		0.122695	1.47725e-08		0.122695	1.70271e-08		0.122695	2.90455e-08
0.125588	9.62842e-10		0.125588	7.78894e-10		0.125588	5.43409e-09		0.125588	1.35445e-08		0.125588	1.6028e-08		0.125588	2.67428e-08
0.128482	9.79729e-10		0.128482	7.84564e-10		0.128482	8.71598e-09		0.128482	1.25391e-08		0.128482	1.52331e-08		0.128482	2.48076e-08
0.131376	9.94049e-10		0.131376	7.91847e-10		0.131376	1.31791e-08		0.131376	1.17182e-08		0.131376	1.46088e-08		0.131376	2.32367e-08
0.13427	1.00578e-09		0.13427	8.0107e-10		0.13427	1.87567e-08		0.13427	1.10497e-08		0.13427	1.41184e-08		0.13427	2.19683e-08
0.137164	1.015e-09		0.137164	8.12598e-10		0.137164	2.52054e-08		0.137164	1.05081e-08		0.137164	1.37331e-08		0.137164	2.09472e-08
0.140058	1.02188e-09		0.140058	8.26281e-10		0.140058	3.21572e-08		0.140058	1.00714e-08		0.140058	1.34299e-08		0.140058	2.01376e-08
0.142952	1.02673e-09		0.142952	8.42052e-10		0.142952	3.90669e-08		0.142952	9.72081e-09		0.142952	1.31906e-08		0.142952	1.94902e-08
0.145846	1.02983e-09		0.145846	8.60354e-10		0.145846	4.31369e-08		0.145846	9.44069e-09		0.145846	1.30007e-08		0.145846	1.89681e-08
0.14874	1.03141e-09		0.14874	8.80798e-10		0.14874	4.27492e-08		0.14874	9.21814e-09		0.14874	1.28486e-08		0.14874	1.85506e-08
0.151633	1.03172e-09		0.151633	9.0296e-10		0.151633	3.96833e-08		0.151633	9.04211e-09		0.151633	1.2725e-08		0.151633	1.82209e-08
0.154527	1.03102e-09		0.154527	9.27162e-10		0.154527	3.54804e-08		0.154527	8.90327e-09		0.154527	1.26227e-08		0.154527	1.7958e-08
0.157421	1.02959e-09		0.157421	9.52897e-10		0.157421	3.1057e-08		0.157421	8.79374e-09		0.157421	1.2536e-08		0.157421	1.77451e-08
0.160315	1.02768e-09		0.160315	9.79898e-10		0.160315	2.6866e-08		0.160315	8.70703e-09		0.160315	1.24605e-08		0.160315	1.75698e-08
0.163209	1.02548e-09		0.163209	1.00785e-09		0.163209	2.31332e-08		0.163209	8.63789e-09		0.163209	1.23931e-08		0.163209	1.74224e-08
0.166103	1.02322e-09		0.166103	1.03614e-09		0.166103	1.99259e-08		0.166103	8.58205e-09		0.166103	1.23314e-08		0.166103	1.72954e-08
0.166103	1.02322e-09		0.166103	1.03614e-09		0.166103	1.99259e-08		0.166103	8.58205e-09		0.166103	1.23314e-08		0.166103	1.72954e-08
0.168997	1.02119e-09		0.168997	1.06483e-09		0.168997	1.71631e-08		0.168997	8.53575e-09		0.168997	1.2275e-08		0.168997	1.71871e-08
0.171891	1.01957e-09		0.171891	1.09391e-09		0.171891	1.47683e-08		0.171891	8.49609e-09		0.171891	1.22238e-08		0.171891	1.70968e-08
0.174785	1.01856e-09		0.174785	1.12274e-09		0.174785	1.27218e-08		0.174785	8.46124e-09		0.174785	1.21763e-08		0.174785	1.70198e-08
0.177678	1.01836e-09		0.177678	1.15101e-09		0.177678	1.09979e-08		0.177678	8.4298e-09		0.177678	1.21316e-08		0.177678	1.69531e-08
0.180572	1.01914e-09		0.180572	1.17918e-09		0.180572	9.55623e-09		0.180572	8.40075e-09		0.180572	1.20889e-08		0.180572	1.68945e-08
0.183466	1.02102e-09		0.183466	1.20671e-09		0.183466	8.36002e-09		0.183466	8.3733e-09		0.183466	1.20476e-08		0.183466	1.68424e-08
0.18636	1.02414e-09		0.18636	1.23331e-09		0.18636	7.37707e-09		0.18636	8.34692e-09		0.18636	1.20074e-08		0.18636	1.67956e-08
0.189254	1.02859e-09		0.189254	1.25894e-09		0.189254	6.58081e-09		0.189254	8.3212e-09		0.189254	1.1968e-08		0.189254	1.67531e-08
0.192148	1.03446e-09		0.192148	1.28329e-09		0.192148	5.95111e-09		0.192148	8.29586e-09		0.192148	1.1929e-08		0.192148	1.67141e-08
0.195042	1.04181e-09		0.195042	1.30689e-09		0.195042	5.47002e-09		0.195042	8.27072e-09		0.195042	1.18904e-08		0.195042	1.66778e-08
0.197936	1.05073e-09		0.197936	1.32951e-09		0.197936	5.12228e-09		0.197936	8.24562e-09		0.197936	1.1852e-08		0.197936	1.66441e-08
0.20083	1.06121e-09		0.20083	1.35112e-09		0.20083	4.89289e-09		0.20083	8.22046e-09		0.20083	1.18138e-08		0.20083	1.66128e-08
0.203723	1.0732e-09		0.203723	1.3718e-09		0.203723	4.76305e-09		0.203723	8.19517e-09		0.203723	1.17761e-08		0.203723	1.65837e-08
0.206617	1.08686e-09		0.206617	1.39148e-09		0.206617	4.7148e-09		0.206617	8.16966e-09		0.206617	1.17387e-08		0.206617	1.65571e-08
0.209511	1.10235e-09		0.209511	1.41071e-09		0.209511	4.73439e-09		0.209511	8.14385e-09		0.209511	1.17018e-08		0.209511	1.6533e-08
0.212405	1.11949e-09		0.212405	1.4294e-09		0.212405	4.81398e-09		0.212405	8.11762e-09		0.212405	1.16652e-08		0.212405	1.65118e-08
0.215299	1.13808e-09		0.215299	1.44751e-09		0.215299	4.94856e-09		0.215299	8.09081e-09		0.215299	1.16292e-08		0.215299	1.64944e-08
0.215299	1.13808e-09		0.215299	1.44751e-09		0.215299	4.94856e-09		0.215299	8.09081e-09		0.215299	1.16292e-08		0.215299	1.64944e-08
0.218193	1.15828e-09		0.218193	1.46571e-09		0.218193	5.11562e-09		0.218193	8.06362e-09		0.218193	1.15931e-08		0.218193	1.64782e-08
0.221087	1.18032e-09		0.221087	1.48477e-09		0.221087	5.28449e-09		0.221087	8.03663e-09		0.221087	1.15563e-08		0.221087	1.64589e-08
0.223981	1.20417e-09		0.223981	1.50476e-09		0.223981	5.43946e-09		0.223981	8.01019e-09		0.223981	1.15185e-08		0.223981	1.64348e-08
0.226875	1.22991e-09		0.226875	1.52551e-09		0.226875	5.57293e-09		0.226875	7.98438e-09		0.226875	1.14795e-08		0.226875	1.64051e-08
0.229768	1.25789e-09		0.229768	1.54733e-09		0.229768	5.68351e-09		0.229768	7.95915e-09		0.229768	1.14393e-08		0.229768	1.63699e-08
0.232662	1.28766e-09		0.232662	1.57075e-09		0.232662	5.77258e-09		0.232662	7.93443e-09		0.232662	1.13979e-08		0.232662	1.63295e-08
0.235556	1.31913e-09		0.235556	1.59574e-09		0.235556	5.84248e-09		0.235556	7.91015e-09		0.235556	1.13554e-08		0.235556	1.62845e-08
0.23845	1.35271e-09		0.23845	1.62225e-09		0.23845	5.89569e-09		0.23845	7.88627e-09		0.23845	1.13124e-08		0.23845	1.62353e-08
0.241344	1.38786e-09		0.241344	1.65053e-09		0.241344	5.93532e-09		0.241344	7.86274e-09		0.241344	1.12693e-08		0.241344	1.61824e-08
0.244238	1.42467e-09		0.244238	1.68053e-09		0.244238	5.96429e-09		0.244238	7.83952e-09		0.244238	1.12262e-08		0.244238	1.61267e-08
0.247132	1.46306e-09		0.247132	1.71254e-09		0.247132	5.98443e-09		0.247132	7.81661e-09		0.247132	1.1183e-08		0.247132	1.60688e-08
0.250026	1.50268e-09		0.250026	1.74696e-09		0.250026	5.9972e-09		0.250026	7.79397e-09		0.250026	1.11398e-08		0.250026	1.6009e-08
0.25292	1.54387e-09		0.25292	1.78399e-09		0.25292	6.00381e-09		0.25292	7.77159e-09		0.25292	1.10965e-08		0.25292	1.59475e-08
0.255814	1.58641e-09		0.255814	1.82371e-09		0.255814	6.00533e-09		0.255814	7.74948e-09		0.255814	1.10531e-08		0.255814	1.58845e-08
0.258707	1.6302e-09		0.258707	1.86641e-09		0.258707	6.00266e-09		0.258707	7.72761e-09		0.258707	1.10096e-08		0.258707	1.582e-08
0.261601	1.67557e-09		0.261601	1.91249e-09		0.261601	5.99656e-09		0.261601	7.70599e-09		0.261601	1.09659e-08		0.261601	1.57544e-08
0.264495	1.72263e-09		0.264495	1.96243e-09		0.264495	5.98766e-09		0.264495	7.68462e-09		0.264495	1.09224e-08		0.264495	1.56876e-08
0.267389	1.77117e-09		0.267389	2.01674e-09		0.267389	5.97653e-09		0.267389	7.66348e-09		0.267389	1.08798e-08		0.267389	1.56198e-08
0.270283	1.8212e-09		0.270283	2.07604e-09		0.270283	5.9636e-09		0.270283	7.64258e-09		0.270283	1.08381e-08		0.270283	1.55512e-08
0.273177	1.87277e-09		0.273177	2.14103e-09		0.273177	5.94924e-09		0.273177	7.62191e-09		0.273177	1.07972e-08		0.273177	1.54817e-08
0.276071	1.92574e-09		0.276071	2.21236e-09		0.276071	5.93377e-09		0.276071	7.60146e-09		0.276071	1.07573e-08		0.276071	1.54115e-08
0.278965	1.98023e-09		0.278965	2.29064e-09		0.278965	5.91743e-09		0.278965	7.58124e-09		0.278965	1.07184e-08		0.278965	1.53405e-08
0.281859	2.03645e-09		0.281859	2.37643e-09		0.281859	5.90043e-09		0.281859	7.56123e-09		0.281859	1.06805e-08		0.281859	1.52688e-08
0.284752	2.0946e-09		0.284752	2.47026e-09		0.284752	5.88293e-09		0.284752	7.54142e-09		0.284752	1.06438e-08		0.284752	1.51965e-08
0.287646	2.15492e-09		0.287646	2.57288e-09		0.287646	5.86506e-09		0.287646	7.52181e-09		0.287646	1.06083e-08		0.287646	1.5124e-08
0.29054	2.21765e-09		0.29054	2.68494e-09		0.29054	5.84694e-09		0.29054	7.50234e-09		0.29054	1.05743e-08		0.29054	1.50517e-08
0.293434	2.28305e-09		0.293434	2.80677e-09		0.293434	5.82864e-09		0.293434	7.48318e-09		0.293434	1.05414e-08		0.293434	1.49797e-08
0.296328	2.35143e-09		0.296328	2.93834e-09		0.296328	5.81024e-09		0.296328	7.46439e-09		0.296328	1.05085e-08		0.296328	1.4908e-08
0.299222	2.4231e-09		0.299222	3.0797e-09		0.299222	5.79178e-09		0.299222	7.44582e-09		0.299222	1.04746e-08		0.299222	1.48367e-08
0.302116	2.49845e-09		0.302116	3.23139e-09		0.302116	5.77329e-09		0.302116	7.42741e-09		0.302116	1.04396e-08		0.302116	1.47657e-08
0.30501	2.57791e-09		0.30501	3.39415e-09		0.30501	5.75481e-09		0.30501	7.40914e-09		0.30501	1.04036e-08		0.30501	1.4695e-08
0.307904	2.66201e-09		0.307904	3.56873e-09		0.307904	5.73635e-09		0.307904	7.39101e-09		0.307904	1.03665e-08		0.307904	1.46248e-08
0.310797	2.75131e-09		0.310797	3.75588e-09		0.310797	5.71792e-09		0.310797	7.37302e-09		0.310797	1.03281e-08		0.310797	1.4555e-08
0.313691	2.84671e-09		0.313691	3.95621e-09		0.313691	5.6995e-09		0.313691	7.35519e-09		0.313691	1.02887e-08		0.313691	1.44856e-08
0.313691	2.84671e-09		0.313691	3.95621e-09		0.313691	5.6995e-09		0.313691	7.35519e-09		0.313691	1.02887e-08		0.313691	1.44856e-08
0.316585	2.94923e-09		0.316585	4.17052e-09		0.316585	5.68095e-09		0.316585	7.33626e-09		0.316585	1.02477e-08		0.316585	1.44159e-08
0.319479	3.05971e-09		0.319479	4.39918e-09		0.319479	5.66211e-09		0.319479	7.31518e-09		0.319479	1.02054e-08		0.319479	1.43453e-08
0.322373	3.17881e-09		0.322373	4.64242e-09		0.322373	5.64305e-09		0.322373	7.2923e-09		0.322373	1.01621e-08		0.322373	1.42737e-08
0.325267	3.30752e-09		0.325267	4.90043e-09		0.325267	5.62377e-09		0.325267	7.26787e-09		0.325267	1.01179e-08		0.325267	1.42016e-08
0.328161	3.44721e-09		0.328161	5.17363e-09		0.328161	5.60435e-09		0.328161	7.24207e-09		0.328161	1.00729e-08		0.328161	1.4129e-08
0.331055	3.5991e-09		0.331055	5.46216e-09		0.331055	5.58494e-09		0.331055	7.21505e-09		0.331055	1.0027e-08		0.331055	1.40561e-08
0.333949	3.76438e-09		0.333949	5.76609e-09		0.333949	5.5656e-09		0.333949	7.18693e-09		0.333949	9.98029e-09		0.333949	1.39829e-08
0.336842	3.94415e-09		0.336842	6.08595e-09		0.336842	5.54634e-09		0.336842	7.15777e-09		0.336842	9.93287e-09		0.336842	1.39096e-08
0.339736	4.13993e-09		0.339736	6.42184e-09		0.339736	5.52716e-09		0.339736	7.12763e-09		0.339736	9.88471e-09		0.339736	1.38361e-08
0.34263	4.35332e-09		0.34263	6.7741e-09		0.34263	5.50806e-09		0.34263	7.09652e-09		0.34263	9.83584e-09		0.34263	1.37625e-08
0.345524	4.58602e-09		0.345524	7.14327e-09		0.345524	5.48906e-09		0.345524	7.06442e-09		0.345524	9.78662e-09		0.345524	1.36886e-08
0.348418	4.83973e-09		0.348418	7.53075e-09		0.348418	5.47015e-09		0.348418	7.03125e-09		0.348418	9.73741e-09		0.348418	1.36147e-08
0.351312	5.11574e-09		0.351312	7.938e-09		0.351312	5.45134e-09		0.351312	6.99689e-09		0.351312	9.68824e-09		0.351312	1.35406e-08
0.354206	5.41582e-09		0.354206	8.36522e-09		0.354206	5.43265e-09		0.354206	6.96107e-09		0.354206	9.63913e-09		0.354206	1.34663e-08
0.3571	5.74154e-09		0.3571	8.81295e-09		0.3571	5.41407e-09		0.3571	6.92496e-09		0.3571	9.59009e-09		0.3571	1.33918e-08
0.359994	6.09407e-09		0.359994	9.28372e-09		0.359994	5.39562e-09		0.359994	6.88985e-09		0.359994	9.54114e-09		0.359994	1.33171e-08
0.362887	6.4752e-09		0.362887	9.7814e-09		0.362887	5.3773e-09		0.362887	6.85571e-09		0.362887	9.4923e-09		0.362887	1.32423e-08
0.365781	6.88643e-09		0.365781	1.03104e-08		0.365781	5.35915e-09		0.365781	6.82256e-09		0.365781	9.44364e-09		0.365781	1.31675e-08
0.368675	7.3287e-09		0.368675	1.08741e-08		0.368675	5.34115e-09		0.368675	6.79046e-09		0.368675	9.39563e-09		0.368675	1.30927e-08
0.371569	7.80284e-09		0.371569	1.14745e-08		0.371569	5.32333e-09		0.371569	6.75942e-09		0.371569	9.34869e-09		0.371569	1.3018e-08
0.374463	8.30967e-09		0.374463	1.21141e-08		0.374463	5.30569e-09		0.374463	6.72948e-09		0.374463	9.30282e-09		0.374463	1.29432e-08
0.377357	8.84983e-09		0.377357	1.27953e-08		0.377357	5.28826e-09		0.377357	6.70068e-09		0.377357	9.25809e-09		0.377357	1.28685e-08
0.380251	9.42457e-09		0.380251	1.3521e-08		0.380251	5.27102e-09		0.380251	6.67303e-09		0.380251	9.21454e-09		0.380251	1.27938e-08
0.383145	1.00349e-08		0.383145	1.42944e-08		0.383145	5.254e-09		0.383145	6.64658e-09		0.383145	9.17221e-09		0.383145	1.27191e-08
0.386039	1.06817e-08		0.386039	1.51188e-08		0.386039	5.23718e-09		0.386039	6.62135e-09		0.386039	9.1311e-09		0.386039	1.26444e-08
0.388932	1.13667e-08		0.388932	1.5995e-08		0.388932	5.22058e-09		0.388932	6.59736e-09		0.388932	9.09128e-09		0.388932	1.25695e-08
0.391826	1.20925e-08		0.391826	1.69239e-08		0.391826	5.2042e-09		0.391826	6.57465e-09		0.391826	9.05335e-09		0.391826	1.24945e-08
0.39472	1.28634e-08		0.39472	1.79106e-08		0.39472	5.18803e-09		0.39472	6.55325e-09		0.39472	9.01795e-09		0.39472	1.24192e-08
0.397614	1.36853e-08		0.397614	1.89646e-08		0.397614	5.1721e-09		0.397614	6.53324e-09		0.397614	8.98524e-09		0.397614	1.23438e-08
0.400508	1.45655e-08		0.400508	2.01003e-08		0.400508	5.15645e-09		0.400508	6.51475e-09		0.400508	8.9554e-09		0.400508	1.22686e-08
0.403402	1.55118e-08		0.403402	2.13331e-08		0.403402	5.1414e-09		0.403402	6.49801e-09		0.403402	8.92864e-09		0.403402	1.21934e-08
0.403402	1.55118e-08		0.403402	2.13331e-08		0.403402	5.1414e-09		0.403402	6.49801e-09		0.403402	8.92864e-09		0.403402	1.21934e-08
0.406296	1.65304e-08		0.406296	2.26754e-08		0.406296	5.12664e-09		0.406296	6.4815e-09		0.406296	8.90266e-09		0.406296	1.21188e-08
0.40919	1.7625e-08		0.40919	2.41341e-08		0.40919	5.1116e-09		0.40919	6.46363e-09		0.40919	8.87503e-09		0.40919	1.20448e-08
0.412084	1.8796e-08		0.412084	2.57119e-08		0.412084	5.09628e-09		0.412084	6.44457e-09		0.412084	8.84599e-09		0.412084	1.19716e-08
0.414977	2.00412e-08		0.414977	2.74153e-08		0.414977	5.08067e-09		0.414977	6.42428e-09		0.414977	8.81571e-09		0.414977	1.1899e-08
0.417871	2.13596e-08		0.417871	2.92569e-08		0.417871	5.06479e-09		0.417871	6.40304e-09		0.417871	8.78412e-09		0.417871	1.18271e-08
0.420765	2.27525e-08		0.420765	3.12659e-08		0.420765	5.04865e-09		0.420765	6.38112e-09		0.420765	8.75122e-09		0.420765	1.17558e-08
0.423659	2.42262e-08		0.423659	3.34669e-08		0.423659	5.03228e-09		0.423659	6.35852e-09		0.423659	8.71704e-09		0.423659	1.16852e-08
0.426553	2.58032e-08		0.426553	3.59213e-08		0.426553	5.01569e-09		0.426553	6.33527e-09		0.426553	8.68163e-09		0.426553	1.16154e-08
0.429447	2.75197e-08		0.429447	3.87372e-08		0.429447	4.99892e-09		0.429447	6.31142e-09		0.429447	8.64507e-09		0.429447	1.15465e-08
0.432341	2.94059e-08		0.432341	4.20273e-08		0.432341	4.98199e-09		0.432341	6.28701e-09		0.432341	8.60744e-09		0.432341	1.14781e-08
0.435235	3.14772e-08		0.435235	4.60046e-08		0.435235	4.96493e-09		0.435235	6.26211e-09		0.435235	8.56891e-09		0.435235	1.14099e-08
0.438129	3.37568e-08		0.438129	5.1017e-08		0.438129	4.94777e-09		0.438129	6.23677e-09		0.438129	8.52964e-09		0.438129	1.13418e-08
0.441023	3.62795e-08		0.441023	5.72371e-08		0.441023	4.93052e-09		0.441023	6.21103e-09		0.441023	8.48972e-09		0.441023	1.12738e-08
0.443916	3.91359e-08		0.443916	6.39219e-08		0.443916	4.91321e-09		0.443916	6.18494e-09		0.443916	8.44924e-09		0.443916	1.12061e-08
0.44681	4.24899e-08		0.44681	7.04447e-08		0.44681	4.89585e-09		0.44681	6.15852e-09		0.44681	8.40827e-09		0.44681	1.11387e-08
0.449704	4.65323e-08		0.449704	7.65997e-08		0.449704	4.87845e-09		0.449704	6.13181e-09		0.449704	8.36687e-09		0.449704	1.10717e-08
0.452598	5.15371e-08		0.452598	8.20784e-08		0.452598	4.86103e-09		0.452598	6.10482e-09		0.452598	8.32508e-09		0.452598	1.10052e-08
0.455492	5.74695e-08		0.455492	8.68448e-08		0.455492	4.84361e-09		0.455492	6.07759e-09		0.455492	8.28299e-09		0.455492	1.09393e-08
0.458386	6.37735e-08		0.458386	9.08332e-08		0.458386	4.82618e-09		0.458386	6.05011e-09		0.458386	8.24064e-09		0.458386	1.08741e-08
0.46128	6.98333e-08		0.46128	9.39732e-08		0.46128	4.80878e-09		0.46128	6.0224e-09		0.46128	8.19807e-09		0.46128	1.081e-08
0.464174	7.53739e-08		0.464174	9.62939e-08		0.464174	4.79141e-09		0.464174	5.99446e-09		0.464174	8.15533e-09		0.464174	1.07469e-08
0.467068	8.01874e-08		0.467068	9.79161e-08		0.467068	4.77408e-09		0.467068	5.96629e-09		0.467068	8.11244e-09		0.467068	1.06843e-08
0.469961	8.41134e-08		0.469961	9.8928e-08		0.469961	4.75681e-09		0.469961	5.93789e-09		0.469961	8.06944e-09		0.469961	1.06213e-08
0.472855	8.72119e-08		0.472855	9.92831e-08		0.472855	4.7396e-09		0.472855	5.90942e-09		0.472855	8.02634e-09		0.472855	1.05581e-08
0.475749	8.95077e-08		0.475749	9.90946e-08		0.475749	4.72245e-09		0.475749	5.88107e-09		0.475749	7.98317e-09		0.475749	1.04946e-08
0.478643	9.10244e-08		0.478643	9.85518e-08		0.478643	4.70536e-09		0.478643	5.85285e-09		0.478643	7.94e-09		0.478643	1.04309e-08
0.481537	9.18616e-08		0.481537	9.76041e-08		0.481537	4.68831e-09		0.481537	5.82478e-09		0.481537	7.89688e-09		0.481537	1.03669e-08
0.484431	9.20621e-08		0.484431	9.62381e-08		0.484431	4.67129e-09		0.484431	5.79689e-09		0.484431	7.85383e-09		0.484431	1.03028e-08
0.487325	9.17174e-08		0.487325	9.45562e-08		0.487325	4.6543e-09		0.487325	5.7692e-09		0.487325	7.81086e-09		0.487325	1.02385e-08
0.490219	9.10059e-08		0.490219	9.26073e-08		0.490219	4.63735e-09		0.490219	5.74172e-09		0.490219	7.76798e-09		0.490219	1.01742e-08
0.493113	8.99098e-08		0.493113	9.0427e-08		0.493113	4.62043e-09		0.493113	5.71447e-09		0.493113	7.72521e-09		0.493113	1.01098e-08
0.496006	8.83682e-08		0.496006	8.80774e-08		0.496006	4.60356e-09		0.496006	5.68747e-09		0.496006	7.68252e-09		0.496006	1.00454e-08
0.4989	8.64935e-08		0.4989	8.56005e-08		0.4989	4.58672e-09		0.4989	5.66074e-09		0.4989	7.64005e-09		0.4989	9.9809e-09
0.501794	8.44201e-08		0.501794	8.30554e-08		0.501794	4.56992e-09		0.501794	5.6343e-09		0.501794	7.59792e-09		0.501794	9.9166e-09
0.504688	8.22017e-08		0.504688	8.04413e-08		0.504688	4.55317e-09		0.504688	5.60817e-09		0.504688	7.55613e-09		0.504688	9.85263e-09
0.507582	7.98808e-08		0.507582	7.77652e-08		0.507582	4.53646e-09		0.507582	5.58237e-09		0.507582	7.5147e-09		0.507582	9.78904e-09
0.510476	7.7445e-08		0.510476	7.50574e-08		0.510476	4.51978e-09		0.510476	5.55693e-09		0.510476	7.47366e-09		0.510476	9.72585e-09
0.51337	7.49094e-08		0.51337	7.23425e-08		0.51337	4.50313e-09		0.51337	5.53189e-09		0.51337	7.433e-09		0.51337	9.6631e-09
0.516264	7.22979e-08		0.516264	6.96436e-08		0.516264	4.48651e-09		0.516264	5.50729e-09		0.516264	7.39276e-09		0.516264	9.60083e-09
0.519158	6.96346e-08		0.519158	6.69701e-08		0.519158	4.4699e-09		0.519158	5.4832e-09		0.519158	7.35303e-09		0.519158	9.53904e-09
0.522051	6.69582e-08		0.522051	6.43389e-08		0.522051	4.4533e-09		0.522051	5.45969e-09		0.522051	7.31399e-09		0.522051	9.47775e-09
0.524945	6.42816e-08		0.524945	6.17564e-08		0.524945	4.43669e-09		0.524945	5.43687e-09		0.524945	7.27584e-09		0.524945	9.41697e-09
0.524945	6.42816e-08		0.524945	6.17564e-08		0.524945	4.43669e-09		0.524945	5.43687e-09		0.524945	7.27584e-09		0.524945	9.41697e-09
0.527839	6.16333e-08		0.527839	5.9239e-08		0.527839	4.4201e-09		0.527839	5.41447e-09		0.527839	7.23831e-09		0.527839	9.35686e-09
0.530733	5.90286e-08		0.530733	5.67923e-08		0.530733	4.40355e-09		0.530733	5.39216e-09		0.530733	7.20108e-09		0.530733	9.29762e-09
0.533627	5.64872e-08		0.533627	5.44205e-08		0.533627	4.38703e-09		0.533627	5.36993e-09		0.533627	7.16412e-09		0.533627	9.23931e-09
0.536521	5.40227e-08		0.536521	5.21245e-08		0.536521	4.37056e-09		0.536521	5.34776e-09		0.536521	7.1274e-09		0.536521	9.18196e-09
0.539415	5.16367e-08		0.539415	4.99147e-08		0.539415	4.35414e-09		0.539415	5.32563e-09		0.539415	7.09089e-09		0.539415	9.12528e-09
0.542309	4.93268e-08		0.542309	4.77979e-08		0.542309	4.33776e-09		0.542309	5.3035e-09		0.542309	7.05456e-09		0.542309	9.069e-09
0.545203	4.70951e-08		0.545203	4.57627e-08		0.545203	4.32142e-09		0.545203	5.28137e-09		0.545203	7.01838e-09		0.545203	9.01314e-09
0.548096	4.49473e-08		0.548096	4.3806e-08		0.548096	4.30513e-09		0.548096	5.25921e-09		0.548096	6.98234e-09		0.548096	8.95771e-09
0.55099	4.28803e-08		0.55099	4.19292e-08		0.55099	4.28889e-09		0.55099	5.23703e-09		0.55099	6.9464e-09		0.55099	8.90273e-09
0.553884	4.08927e-08		0.553884	4.01357e-08		0.553884	4.27271e-09		0.553884	5.21479e-09		0.553884	6.91054e-09		0.553884	8.84821e-09
0.556778	3.89932e-08		0.556778	3.84265e-08		0.556778	4.25658e-09		0.556778	5.19251e-09		0.556778	6.87473e-09		0.556778	8.79419e-09
0.559672	3.71771e-08		0.559672	3.67907e-08		0.559672	4.24049e-09		0.559672	5.17018e-09		0.559672	6.83894e-09		0.559672	8.74069e-09
0.562566	3.54434e-08		0.562566	3.52191e-08		0.562566	4.22445e-09		0.562566	5.14779e-09		0.562566	6.80321e-09		0.562566	8.68774e-09
0.56546	3.37938e-08		0.56546	3.37149e-08		0.56546	4.20844e-09		0.56546	5.12533e-09		0.56546	6.76757e-09		0.56546	8.63538e-09
0.568354	3.22186e-08		0.568354	3.2283e-08		0.568354	4.19247e-09		0.568354	5.10281e-09		0.568354	6.73202e-09		0.568354	8.58367e-09
0.571248	3.07078e-08		0.571248	3.09194e-08		0.571248	4.17654e-09		0.571248	5.08022e-09		0.571248	6.69656e-09		0.571248	8.53267e-09
0.574142	2.92682e-08		0.574142	2.96152e-08		0.574142	4.16063e-09		0.574142	5.05756e-09		0.574142	6.66116e-09		0.574142	8.4821e-09
0.577035	2.79138e-08		0.577035	2.83693e-08		0.577035	4.14476e-09		0.577035	5.03482e-09		0.577035	6.62582e-09		0.577035	8.43169e-09
0.579929	2.66371e-08		0.579929	2.71846e-08		0.579929	4.12891e-09		0.579929	5.01205e-09		0.579929	6.59053e-09		0.579929	8.38141e-09
0.582823	2.5419e-08		0.582823	2.60686e-08		0.582823	4.1131e-09		0.582823	4.98931e-09		0.582823	6.55527e-09		0.582823	8.33129e-09
0.585717	2.42543e-08		0.585717	2.50114e-08		0.585717	4.09731e-09		0.585717	4.96661e-09		0.585717	6.52009e-09		0.585717	8.28132e-09
0.588611	2.31496e-08		0.588611	2.39967e-08		0.588611	4.08155e-09		0.588611	4.94397e-09		0.588611	6.48508e-09		0.588611	8.23151e-09
0.591505	2.21125e-08		0.591505	2.30274e-08		0.591505	4.06581e-09		0.591505	4.92138e-09		0.591505	6.4502e-09		0.591505	8.18187e-09
0.594399	2.11261e-08		0.594399	2.21078e-08		0.594399	4.05011e-09		0.594399	4.89885e-09		0.594399	6.41549e-09		0.594399	8.1324e-09
0.597293	2.01715e-08		0.597293	2.1239e-08		0.597293	4.03442e-09		0.597293	4.87639e-09		0.597293	6.38092e-09		0.597293	8.0831e-09
0.600186	1.92534e-08		0.600186	2.04171e-08		0.600186	4.01877e-09		0.600186	4.85399e-09		0.600186	6.3465e-09		0.600186	8.03397e-09
0.60308	1.83762e-08		0.60308	1.96239e-08		0.60308	4.00314e-09		0.60308	4.83167e-09		0.60308	6.31222e-09		0.60308	7.98502e-09
0.605974	1.7552e-08		0.605974	1.88491e-08		0.605974	3.98753e-09		0.605974	4.80943e-09		0.605974	6.27807e-09		0.605974	7.93624e-09
0.608868	1.67913e-08		0.608868	1.81023e-08		0.608868	3.97194e-09		0.608868	4.78725e-09		0.608868	6.24413e-09		0.608868	7.88762e-09
0.611762	1.60671e-08		0.611762	1.73878e-08		0.611762	3.95639e-09		0.611762	4.76513e-09		0.611762	6.2105e-09		0.611762	7.83916e-09
0.614656	1.53635e-08		0.614656	1.67059e-08		0.614656	3.9409e-09		0.614656	4.74308e-09		0.614656	6.17717e-09		0.614656	7.79105e-09
0.61755	1.46942e-08		0.61755	1.60582e-08		0.61755	3.9255e-09		0.61755	4.72108e-09		0.61755	6.14416e-09		0.61755	7.74351e-09
0.620444	1.40666e-08		0.620444	1.54552e-08		0.620444	3.91018e-09		0.620444	4.69911e-09		0.620444	6.11147e-09		0.620444	7.69654e-09
0.623338	1.34892e-08		0.623338	1.48841e-08		0.623338	3.89496e-09		0.623338	4.67719e-09		0.623338	6.07911e-09		0.623338	7.65017e-09
0.626231	1.29617e-08		0.626231	1.43259e-08		0.626231	3.87984e-09		0.626231	4.65529e-09		0.626231	6.04707e-09		0.626231	7.60441e-09
0.629125	1.24835e-08		0.629125	1.37839e-08		0.629125	3.86483e-09		0.629125	4.63344e-09		0.629125	6.01535e-09		0.629125	7.55928e-09
0.632019	1.20481e-08		0.632019	1.32651e-08		0.632019	3.84994e-09		0.632019	4.61165e-09		0.632019	5.98406e-09		0.632019	7.51481e-09
0.634913	1.1633e-08		0.634913	1.27787e-08		0.634913	3.83518e-09		0.634913	4.59003e-09		0.634913	5.95331e-09		0.634913	7.47101e-09
0.637807	1.12295e-08		0.637807	1.23287e-08		0.637807	3.82057e-09		0.637807	4.56874e-09		0.637807	5.92317e-09		0.637807	7.42795e-09
0.640701	1.08449e-08		0.640701	1.19248e-08		0.640701	3.80613e-09		0.640701	4.54791e-09		0.640701	5.89375e-09		0.640701	7.3857e-09
0.643595	1.04881e-08		0.643595	1.15819e-08		0.643595	3.79188e-09		0.643595	4.52764e-09		0.643595	5.86521e-09		0.643595	7.34438e-09
0.643595	1.04881e-08		0.643595	1.15819e-08		0.643595	3.79188e-09		0.643595	4.52764e-09		0.643595	5.86521e-09		0.643595	7.34438e-09
0.646489	1.01599e-08		0.646489	1.12861e-08		0.646489	3.77779e-09		0.646489	4.50785e-09		0.646489	5.83733e-09		0.646489	7.30391e-09
0.649383	9.85201e-09		0.649383	1.10113e-08		0.649383	3.76381e-09		0.649383	4.4884e-09		0.649383	5.80975e-09		0.649383	7.26411e-09
0.652277	9.55778e-09		0.652277	1.07509e-08		0.652277	3.7499e-09		0.652277	4.46924e-09		0.652277	5.78243e-09		0.652277	7.22501e-09
0.65517	9.27252e-09		0.65517	1.05009e-08		0.65517	3.73604e-09		0.65517	4.45032e-09		0.65517	5.75531e-09		0.65517	7.18643e-09
0.658064	8.99725e-09		0.658064	1.02593e-08		0.658064	3.72224e-09		0.658064	4.43158e-09		0.658064	5.72835e-09		0.658064	7.14818e-09
0.660958	8.73272e-09		0.660958	1.00245e-08		0.660958	3.70846e-09		0.660958	4.41297e-09		0.660958	5.7015e-09		0.660958	7.11022e-09
0.663852	8.47781e-09		0.663852	9.79606e-09		0.663852	3.6947e-09		0.663852	4.39445e-09		0.663852	5.67473e-09		0.663852	7.07252e-09
0.666746	8.23233e-09		0.666746	9.57368e-09		0.666746	3.68095e-09		0.666746	4.37598e-09		0.666746	5.64801e-09		0.666746	7.03506e-09
0.66964	7.99699e-09		0.66964	9.35659e-09		0.66964	3.66721e-09		0.66964	4.35754e-09		0.66964	5.62133e-09		0.66964	6.99782e-09
0.672534	7.7711e-09		0.672534	9.14541e-09		0.672534	3.65346e-09		0.672534	4.33912e-09		0.672534	5.59468e-09		0.672534	6.9608e-09
0.675428	7.55519e-09		0.675428	8.94094e-09		0.675428	3.63971e-09		0.675428	4.3207e-09		0.675428	5.56805e-09		0.675428	6.92398e-09
0.678322	7.35003e-09		0.678322	8.74255e-09		0.678322	3.62593e-09		0.678322	4.30227e-09		0.678322	5.54142e-09		0.678322	6.88736e-09
0.681215	7.15536e-09		0.681215	8.55186e-09		0.681215	3.61213e-09		0.681215	4.28383e-09		0.681215	5.51483e-09		0.681215	6.85094e-09
0.684109	6.97103e-09		0.684109	8.37004e-09		0.684109	3.59832e-09		0.684109	4.26536e-09		0.684109	5.48829e-09		0.684109	6.8147e-09
0.687003	6.79554e-09		0.687003	8.19473e-09		0.687003	3.58455e-09		0.687003	4.24687e-09		0.687003	5.46179e-09		0.687003	6.77862e-09
0.689897	6.62741e-09		0.689897	8.02444e-09		0.689897	3.57085e-09		0.689897	4.22833e-09		0.689897	5.43535e-09		0.689897	6.7427e-09
0.692791	6.46676e-09		0.692791	7.85954e-09		0.692791	3.55722e-09		0.692791	4.20976e-09		0.692791	5.40894e-09		0.692791	6.70689e-09
0.695685	6.31388e-09		0.695685	7.70045e-09		0.695685	3.54366e-09		0.695685	4.19119e-09		0.695685	5.38257e-09		0.695685	6.67115e-09
0.698579	6.16836e-09		0.698579	7.5462e-09		0.698579	3.53015e-09		0.698579	4.17265e-09		0.698579	5.35624e-09		0.698579	6.63529e-09
0.701473	6.02987e-09		0.701473	7.3958e-09		0.701473	3.51671e-09		0.701473	4.15413e-09		0.701473	5.32992e-09		0.701473	6.59905e-09
0.704367	5.89894e-09		0.704367	7.24955e-09		0.704367	3.50331e-09		0.704367	4.13563e-09		0.704367	5.30361e-09		0.704367	6.56224e-09
0.70726	5.77615e-09		0.70726	7.10824e-09		0.70726	3.48997e-09		0.70726	4.11716e-09		0.70726	5.27736e-09		0.70726	6.52459e-09
0.710154	5.66188e-09		0.710154	6.97269e-09		0.710154	3.47667e-09		0.710154	4.09869e-09		0.710154	5.25121e-09		0.710154	6.48574e-09
0.713048	5.55461e-09		0.713048	6.84373e-09		0.713048	3.46339e-09		0.713048	4.08024e-09		0.713048	5.22516e-09		0.713048	6.44511e-09
0.715942	5.45361e-09		0.715942	6.72257e-09		0.715942	3.45014e-09		0.715942	4.0618e-09		0.715942	5.19924e-09		0.715942	6.40193e-09
0.715942	5.45361e-09		0.715942	6.72257e-09		0.715942	3.45014e-09		0.715942	4.0618e-09		0.715942	5.19924e-09		0.715942	6.40193e-09
0.718836	5.35775e-09		0.718836	6.60732e-09		0.718836	3.43691e-09		0.718836	4.04335e-09		0.718836	5.17339e-09		0.718836	6.35734e-09
0.72173	5.26498e-09		0.72173	6.49532e-09		0.72173	3.42373e-09		0.72173	4.02487e-09		0.72173	5.14756e-09		0.72173	6.313e-09
0.724624	5.17536e-09		0.724624	6.38639e-09		0.724624	3.41057e-09		0.724624	4.00637e-09		0.724624	5.12174e-09		0.724624	6.26894e-09
0.727518	5.08881e-09		0.727518	6.28028e-09		0.727518	3.39744e-09		0.727518	3.98782e-09		0.727518	5.0959e-09		0.727518	6.2252e-09
0.730412	5.00514e-09		0.730412	6.1767e-09		0.730412	3.38434e-09		0.730412	3.96922e-09		0.730412	5.07005e-09		0.730412	6.18188e-09
0.733305	4.92409e-09		0.733305	6.07535e-09		0.733305	3.37124e-09		0.733305	3.95055e-09		0.733305	5.04412e-09		0.733305	6.13907e-09
0.736199	4.84544e-09		0.736199	5.97625e-09		0.736199	3.35815e-09		0.736199	3.9318e-09		0.736199	5.01801e-09		0.736199	6.09688e-09
0.739093	4.76895e-09		0.739093	5.87943e-09		0.739093	3.34505e-09		0.739093	3.91295e-09		0.739093	4.99169e-09		0.739093	6.05545e-09
0.741987	4.6944e-09		0.741987	5.78463e-09		0.741987	3.33193e-09		0.741987	3.89397e-09		0.741987	4.96512e-09		0.741987	6.01437e-09
0.744881	4.62167e-09		0.744881	5.69159e-09		0.744881	3.31878e-09		0.744881	3.87485e-09		0.744881	4.93825e-09		0.744881	5.97299e-09
0.747775	4.55064e-09		0.747775	5.60007e-09		0.747775	3.30558e-09		0.747775	3.85556e-09		0.747775	4.91103e-09		0.747775	5.93113e-09
0.750669	4.48112e-09		0.750669	5.50981e-09		0.750669	3.29231e-09		0.750669	3.83607e-09		0.750669	4.88339e-09		0.750669	5.88878e-09
0.753563	4.41291e-09		0.753563	5.42088e-09		0.753563	3.27895e-09		0.753563	3.81634e-09		0.753563	4.85528e-09		0.753563	5.84593e-09
0.756457	4.34582e-09		0.756457	5.33333e-09		0.756457	3.26543e-09		0.756457	3.79621e-09		0.756457	4.82659e-09		0.756457	5.80257e-09
0.75935	4.27969e-09		0.75935	5.24692e-09		0.75935	3.25164e-09		0.75935	3.77556e-09		0.75935	4.79717e-09		0.75935	5.75868e-09
0.762244	4.21436e-09		0.762244	5.1614e-09		0.762244	3.23749e-09		0.762244	3.75431e-09		0.762244	4.76692e-09		0.762244	5.71425e-09
0.765138	4.14978e-09		0.765138	5.07649e-09		0.765138	3.22292e-09		0.765138	3.73242e-09		0.765138	4.73572e-09		0.765138	5.66927e-09
0.768032	4.08587e-09		0.768032	4.99179e-09		0.768032	3.20789e-09		0.768032	3.70982e-09		0.768032	4.7035e-09		0.768032	5.62375e-09
0.770926	4.02253e-09		0.770926	4.90752e-09		0.770926	3.19233e-09		0.770926	3.68646e-09		0.770926	4.67016e-09		0.770926	5.57769e-09
0.77382	3.95966e-09		0.77382	4.82415e-09		0.77382	3.17618e-09		0.77382	3.66229e-09		0.77382	4.63562e-09		0.77382	5.53114e-09
0.776714	3.89723e-09		0.776714	4.74172e-09		0.776714	3.15936e-09		0.776714	3.63728e-09		0.776714	4.5998e-09		0.776714	5.4841e-09
0.779608	3.83528e-09		0.779608	4.66021e-09		0.779608	3.14184e-09		0.779608	3.61139e-09		0.779608	4.5626e-09		0.779608	5.43612e-09
0.782502	3.77392e-09		0.782502	4.57967e-09		0.782502	3.12356e-09		0.782502	3.58461e-09		0.782502	4.52393e-09		0.782502	5.38647e-09
0.785396	3.71341e-09		0.785396	4.5002e-09		0.785396	3.10448e-09		0.785396	3.55696e-09		0.785396	4.48372e-09		0.785396	5.33505e-09
0.788289	3.654e-09		0.788289	4.42269e-09		0.788289	3.08457e-09		0.788289	3.52844e-09		0.788289	4.44193e-09		0.788289	5.28206e-09
0.791183	3.5959e-09		0.791183	4.34816e-09		0.791183	3.06379e-09		0.791183	3.49908e-09		0.791183	4.39855e-09		0.791183	5.22768e-09
0.794077	3.53938e-09		0.794077	4.27705e-09		0.794077	3.04213e-09		0.794077	3.4689e-09		0.794077	4.35351e-09		0.794077	5.17212e-09
0.796971	3.48467e-09		0.796971	4.20968e-09		0.796971	3.01954e-09		0.796971	3.43794e-09		0.796971	4.30678e-09		0.796971	5.11554e-09
0.799865	3.4319e-09		0.799865	4.14616e-09		0.799865	2.99598e-09		0.799865	3.40621e-09		0.799865	4.25826e-09		0.799865	5.05807e-09
0.799865	3.4319e-09		0.799865	4.14616e-09		0.799865	2.99598e-09		0.799865	3.40621e-09		0.799865	4.25826e-09		0.799865	5.05807e-09
0.802759	3.38011e-09		0.802759	4.08415e-09		0.802759	2.97128e-09		0.802759	3.3736e-09		0.802759	4.20818e-09		0.802759	4.99894e-09
0.805653	3.32835e-09		0.805653	4.0215e-09		0.805653	2.94526e-09		0.805653	3.33997e-09		0.805653	4.15679e-09		0.805653	4.93736e-09
0.808547	3.27677e-09		0.808547	3.95858e-09		0.808547	2.9178e-09		0.808547	3.30534e-09		0.808547	4.10413e-09		0.808547	4.87342e-09
0.811441	3.22547e-09		0.811441	3.89551e-09		0.811441	2.8891e-09		0.811441	3.26972e-09		0.811441	4.05032e-09		0.811441	4.80722e-09
0.814334	3.17446e-09		0.814334	3.83228e-09		0.814334	2.8594e-09		0.814334	3.2331e-09		0.814334	3.99552e-09		0.814334	4.73875e-09
0.817228	3.12371e-09		0.817228	3.76877e-09		0.817228	2.82869e-09		0.817228	3.1955e-09		0.817228	3.93988e-09		0.817228	4.668e-09
0.820122	3.07317e-09		0.820122	3.70514e-09		0.820122	2.79694e-09		0.820122	3.15695e-09		0.820122	3.88344e-09		0.820122	4.59496e-09
0.823016	3.0229e-09		0.823016	3.64158e-09		0.823016	2.76414e-09		0.823016	3.11747e-09		0.823016	3.8261e-09		0.823016	4.51959e-09
0.82591	2.97293e-09		0.82591	3.57799e-09		0.82591	2.7303e-09		0.82591	3.07715e-09		0.82591	3.76787e-09		0.82591	4.44206e-09
0.828804	2.92314e-09		0.828804	3.51424e-09		0.828804	2.69545e-09		0.828804	3.03587e-09		0.828804	3.70891e-09		0.828804	4.36254e-09
0.831698	2.87344e-09		0.831698	3.45025e-09		0.831698	2.65968e-09		0.831698	2.99349e-09		0.831698	3.64922e-09		0.831698	4.28111e-09
0.834592	2.82369e-09		0.834592	3.38604e-09		0.834592	2.62308e-09		0.834592	2.95007e-09		0.834592	3.58878e-09		0.834592	4.19784e-09
0.837486	2.77379e-09		0.837486	3.32208e-09		0.837486	2.58585e-09		0.837486	2.90568e-09		0.837486	3.52782e-09		0.837486	4.11287e-09
0.840379	2.72401e-09		0.840379	3.25877e-09		0.840379	2.5478e-09		0.840379	2.86047e-09		0.840379	3.46641e-09		0.840379	4.02632e-09
0.843273	2.67469e-09		0.843273	3.19616e-09		0.843273	2.5087e-09		0.843273	2.81458e-09		0.843273	3.40463e-09		0.843273	3.93861e-09
0.846167	2.62588e-09		0.846167	3.13442e-09		0.846167	2.4687e-09		0.846167	2.76821e-09		0.846167	3.34277e-09		0.846167	3.85021e-09
0.849061	2.57763e-09		0.849061	3.07396e-09		0.849061	2.42803e-09		0.849061	2.72151e-09		0.849061	3.28106e-09		0.849061	3.76139e-09
0.851955	2.53004e-09		0.851955	3.01548e-09		0.851955	2.38697e-09		0.851955	2.67468e-09		0.851955	3.21971e-09		0.851955	3.67245e-09
0.854849	2.48328e-09		0.854849	2.95982e-09		0.854849	2.34585e-09		0.854849	2.62799e-09		0.854849	3.15907e-09		0.854849	3.5839e-09
0.857743	2.43763e-09		0.857743	2.90763e-09		0.857743	2.30505e-09		0.857743	2.58178e-09		0.857743	3.09949e-09		0.857743	3.49671e-09
0.860637	2.39371e-09		0.860637	2.85796e-09		0.860637	2.26487e-09		0.860637	2.53647e-09		0.860637	3.0415e-09		0.860637	3.41181e-09
0.863531	2.35223e-09		0.863531	2.80958e-09		0.863531	2.22568e-09		0.863531	2.4926e-09		0.863531	2.98575e-09		0.863531	3.32997e-09
0.866424	2.31377e-09		0.866424	2.76339e-09		0.866424	2.18827e-09		0.866424	2.45105e-09		0.866424	2.93315e-09		0.866424	3.25236e-09
0.869318	2.27922e-09		0.869318	2.7215e-09		0.869318	2.15375e-09		0.869318	2.41308e-09		0.869318	2.88516e-09		0.869318	3.18104e-09
0.872212	2.25006e-09		0.872212	2.68607e-09		0.872212	2.12382e-09		0.872212	2.38047e-09		0.872212	2.844e-09		0.872212	3.11977e-09
0.875106	2.22868e-09		0.875106	2.65991e-09		0.875106	2.10124e-09		0.875106	2.35608e-09		0.875106	2.81331e-09		0.875106	3.07433e-09
0.878	2.2204e-09		0.878	2.64972e-09		0.878	2.09221e-09		0.878	2.34639e-09		0.878	2.80115e-09		0.878	3.05641e-09

## Sheet: no2 distribution
SN 0			SN 0.2			SN 0.4			SN 0.6			SN 0.8			SN 1
Axial distance	no2 mass fraction		Axial distance	no2 mass fraction		Axial distance	no2 mass fraction		Axial distance	no2 mass fraction		Axial distance	no2 mass fraction		Axial distance	no2 mass fraction
0.00115113	3.10963e-09		0.00115113	3.03857e-09		0.00115113	2.46843e-09		0.00115113	6.41058e-10		0.00115113	3.81383e-10		0.00115113	2.31099e-10
0.00404502	4.185e-09		0.00404502	4.05936e-09		0.00404502	3.03565e-09		0.00404502	7.82509e-10		0.00404502	4.09793e-10		0.00404502	2.4886e-10
0.00693891	5.36798e-09		0.00693891	5.2018e-09		0.00693891	3.53303e-09		0.00693891	9.18561e-10		0.00693891	4.29957e-10		0.00693891	2.58408e-10
0.0098328	6.65943e-09		0.0098328	6.42376e-09		0.0098328	3.93976e-09		0.0098328	1.05111e-09		0.0098328	4.43999e-10		0.0098328	2.60059e-10
0.0127267	8.01328e-09		0.0127267	7.64916e-09		0.0127267	4.25758e-09		0.0127267	1.17334e-09		0.0127267	4.53247e-10		0.0127267	2.54689e-10
0.0156206	9.41923e-09		0.0156206	8.86677e-09		0.0156206	4.51823e-09		0.0156206	1.26666e-09		0.0156206	4.56227e-10		0.0156206	2.43807e-10
0.0185145	1.08027e-08		0.0185145	1.00051e-08		0.0185145	4.75712e-09		0.0185145	1.32475e-09		0.0185145	4.53457e-10		0.0185145	2.28867e-10
0.0214084	1.20487e-08		0.0214084	1.0942e-08		0.0214084	4.98954e-09		0.0214084	1.3505e-09		0.0214084	4.45695e-10		0.0214084	2.1081e-10
0.0243023	1.31401e-08		0.0243023	1.16387e-08		0.0243023	5.22661e-09		0.0243023	1.34818e-09		0.0243023	4.30874e-10		0.0243023	1.90623e-10
0.0271961	1.40262e-08		0.0271961	1.21018e-08		0.0271961	5.46707e-09		0.0271961	1.32173e-09		0.0271961	4.0871e-10		0.0271961	1.70143e-10
0.03009	1.46504e-08		0.03009	1.23622e-08		0.03009	5.6965e-09		0.03009	1.28115e-09		0.03009	3.79511e-10		0.03009	1.52293e-10
0.0329839	1.50292e-08		0.0329839	1.24606e-08		0.0329839	5.89852e-09		0.0329839	1.22855e-09		0.0329839	3.48115e-10		0.0329839	1.39747e-10
0.0358778	1.52033e-08		0.0358778	1.2445e-08		0.0358778	6.06159e-09		0.0358778	1.16194e-09		0.0358778	3.18397e-10		0.0358778	1.34457e-10
0.0387717	1.52187e-08		0.0387717	1.23647e-08		0.0387717	6.18123e-09		0.0387717	1.08762e-09		0.0387717	2.93676e-10		0.0387717	1.37475e-10
0.0416656	1.51231e-08		0.0416656	1.2263e-08		0.0416656	6.25963e-09		0.0416656	1.01244e-09		0.0416656	2.80914e-10		0.0416656	1.49563e-10
0.0445595	1.49618e-08		0.0445595	1.21759e-08		0.0445595	6.30048e-09		0.0445595	9.41468e-10		0.0445595	2.84803e-10		0.0445595	1.72559e-10
0.0474534	1.47729e-08		0.0474534	1.21311e-08		0.0474534	6.30792e-09		0.0474534	8.78433e-10		0.0474534	3.1006e-10		0.0474534	2.08991e-10
0.0503473	1.45887e-08		0.0503473	1.21472e-08		0.0503473	6.28652e-09		0.0503473	8.3419e-10		0.0503473	3.70447e-10		0.0503473	2.6179e-10
0.0532412	1.44355e-08		0.0532412	1.22344e-08		0.0532412	6.24006e-09		0.0532412	8.2649e-10		0.0532412	4.88817e-10		0.0532412	3.33826e-10
0.056135	1.43334e-08		0.056135	1.2396e-08		0.056135	6.1736e-09		0.056135	8.9061e-10		0.056135	7.02026e-10		0.056135	4.2815e-10
0.0590289	1.42956e-08		0.0590289	1.263e-08		0.0590289	6.10488e-09		0.0590289	1.15038e-09		0.0590289	1.09208e-09		0.0590289	5.48489e-10
0.0619228	1.43289e-08		0.0619228	1.293e-08		0.0619228	6.03189e-09		0.0619228	1.92235e-09		0.0619228	1.8415e-09		0.0619228	7.02534e-10
0.0648167	1.44365e-08		0.0648167	1.32854e-08		0.0648167	5.93972e-09		0.0648167	3.95558e-09		0.0648167	3.38002e-09		0.0648167	9.09424e-10
0.0677106	1.4619e-08		0.0677106	1.36826e-08		0.0677106	5.84039e-09		0.0677106	9.10607e-09		0.0677106	6.61424e-09		0.0677106	1.21599e-09
0.0706045	1.48739e-08		0.0706045	1.41054e-08		0.0706045	5.73211e-09		0.0706045	2.03209e-08		0.0706045	1.36991e-08		0.0706045	1.73606e-09
0.0734984	1.51957e-08		0.0734984	1.45368e-08		0.0734984	5.60612e-09		0.0734984	4.20584e-08		0.0734984	2.83038e-08		0.0734984	2.74893e-09
0.0763923	1.55768e-08		0.0763923	1.49612e-08		0.0763923	5.47636e-09		0.0763923	8.03148e-08		0.0763923	5.50106e-08		0.0763923	4.84955e-09
0.0792862	1.601e-08		0.0792862	1.53652e-08		0.0792862	5.34259e-09		0.0792862	1.50926e-07		0.0792862	1.03237e-07		0.0792862	9.11049e-09
0.0821801	1.64844e-08		0.0821801	1.5738e-08		0.0821801	5.19652e-09		0.0821801	2.79265e-07		0.0821801	1.89541e-07		0.0821801	1.75709e-08
0.085074	1.6986e-08		0.085074	1.60726e-08		0.085074	5.04883e-09		0.085074	4.88832e-07		0.085074	3.35867e-07		0.085074	3.39661e-08
0.085074	1.6986e-08		0.085074	1.60726e-08		0.085074	5.04883e-09		0.085074	4.88832e-07		0.085074	3.35867e-07		0.085074	3.39661e-08
0.0879678	1.75033e-08		0.0879678	1.63674e-08		0.0879678	4.90126e-09		0.0879678	7.92289e-07		0.0879678	5.64917e-07		0.0879678	6.4443e-08
0.0908617	1.80268e-08		0.0908617	1.66236e-08		0.0908617	4.75344e-09		0.0908617	1.17582e-06		0.0908617	8.87258e-07		0.0908617	1.18214e-07
0.0937556	1.85567e-08		0.0937556	1.68441e-08		0.0937556	4.60872e-09		0.0937556	1.5985e-06		0.0937556	1.2874e-06		0.0937556	2.08153e-07
0.0966495	1.90748e-08		0.0966495	1.70341e-08		0.0966495	4.47027e-09		0.0966495	2.01376e-06		0.0966495	1.72476e-06		0.0966495	3.5034e-07
0.0995434	1.95631e-08		0.0995434	1.72006e-08		0.0995434	4.3624e-09		0.0995434	2.35202e-06		0.0995434	2.15129e-06		0.0995434	5.60611e-07
0.102437	2.00236e-08		0.102437	1.73511e-08		0.102437	4.36748e-09		0.102437	2.56748e-06		0.102437	2.48747e-06		0.102437	8.47555e-07
0.105331	2.04505e-08		0.105331	1.74923e-08		0.105331	4.73701e-09		0.105331	2.68525e-06		0.105331	2.69087e-06		0.105331	1.20444e-06
0.108225	2.08392e-08		0.108225	1.76314e-08		0.108225	6.15736e-09		0.108225	2.74241e-06		0.108225	2.79993e-06		0.108225	1.6066e-06
0.111119	2.11873e-08		0.111119	1.7777e-08		0.111119	1.01741e-08		0.111119	2.76452e-06		0.111119	2.85428e-06		0.111119	2.0195e-06
0.114013	2.14981e-08		0.114013	1.79316e-08		0.114013	1.98693e-08		0.114013	2.76806e-06		0.114013	2.87798e-06		0.114013	2.37903e-06
0.116907	2.17669e-08		0.116907	1.80992e-08		0.116907	3.99352e-08		0.116907	2.76004e-06		0.116907	2.88539e-06		0.116907	2.63363e-06
0.119801	2.19939e-08		0.119801	1.82839e-08		0.119801	7.68556e-08		0.119801	2.74459e-06		0.119801	2.88449e-06		0.119801	2.79272e-06
0.122695	2.21849e-08		0.122695	1.84866e-08		0.122695	1.36849e-07		0.122695	2.72615e-06		0.122695	2.87889e-06		0.122695	2.88654e-06
0.125588	2.23414e-08		0.125588	1.8712e-08		0.125588	2.31173e-07		0.125588	2.7075e-06		0.125588	2.87037e-06		0.125588	2.94027e-06
0.128482	2.24717e-08		0.128482	1.89597e-08		0.128482	3.73333e-07		0.128482	2.6896e-06		0.128482	2.86131e-06		0.128482	2.96997e-06
0.131376	2.25806e-08		0.131376	1.92285e-08		0.131376	5.6942e-07		0.131376	2.67314e-06		0.131376	2.85317e-06		0.131376	2.98561e-06
0.13427	2.26719e-08		0.13427	1.95183e-08		0.13427	8.18366e-07		0.13427	2.65865e-06		0.13427	2.84583e-06		0.13427	2.99232e-06
0.137164	2.27503e-08		0.137164	1.9832e-08		0.137164	1.11155e-06		0.137164	2.64592e-06		0.137164	2.83915e-06		0.137164	2.99396e-06
0.140058	2.28205e-08		0.140058	2.01606e-08		0.140058	1.43506e-06		0.140058	2.63462e-06		0.140058	2.83303e-06		0.140058	2.99343e-06
0.142952	2.28874e-08		0.142952	2.04975e-08		0.142952	1.77282e-06		0.142952	2.62479e-06		0.142952	2.82739e-06		0.142952	2.99132e-06
0.145846	2.29554e-08		0.145846	2.085e-08		0.145846	2.08975e-06		0.145846	2.61647e-06		0.145846	2.82224e-06		0.145846	2.98807e-06
0.14874	2.30284e-08		0.14874	2.12092e-08		0.14874	2.34025e-06		0.14874	2.60942e-06		0.14874	2.8176e-06		0.14874	2.98439e-06
0.151633	2.31099e-08		0.151633	2.15671e-08		0.151633	2.50755e-06		0.151633	2.60345e-06		0.151633	2.81335e-06		0.151633	2.98077e-06
0.154527	2.32026e-08		0.154527	2.19303e-08		0.154527	2.60246e-06		0.154527	2.59837e-06		0.154527	2.80939e-06		0.154527	2.97724e-06
0.157421	2.33091e-08		0.157421	2.22916e-08		0.157421	2.6436e-06		0.157421	2.59402e-06		0.157421	2.80563e-06		0.157421	2.97377e-06
0.160315	2.34318e-08		0.160315	2.26485e-08		0.160315	2.64815e-06		0.160315	2.59023e-06		0.160315	2.80202e-06		0.160315	2.97032e-06
0.163209	2.35741e-08		0.163209	2.29992e-08		0.163209	2.62933e-06		0.163209	2.58689e-06		0.163209	2.79849e-06		0.163209	2.96687e-06
0.166103	2.37349e-08		0.166103	2.33382e-08		0.166103	2.59738e-06		0.166103	2.58389e-06		0.166103	2.79502e-06		0.166103	2.96339e-06
0.166103	2.37349e-08		0.166103	2.33382e-08		0.166103	2.59738e-06		0.166103	2.58389e-06		0.166103	2.79502e-06		0.166103	2.96339e-06
0.168997	2.39142e-08		0.168997	2.36701e-08		0.168997	2.55681e-06		0.168997	2.58112e-06		0.168997	2.79163e-06		0.168997	2.96004e-06
0.171891	2.41176e-08		0.171891	2.39972e-08		0.171891	2.5101e-06		0.171891	2.57849e-06		0.171891	2.78835e-06		0.171891	2.95694e-06
0.174785	2.4343e-08		0.174785	2.43162e-08		0.174785	2.4628e-06		0.174785	2.57597e-06		0.174785	2.78513e-06		0.174785	2.95403e-06
0.177678	2.45885e-08		0.177678	2.46269e-08		0.177678	2.41934e-06		0.177678	2.57351e-06		0.177678	2.78196e-06		0.177678	2.95126e-06
0.180572	2.48607e-08		0.180572	2.49384e-08		0.180572	2.38081e-06		0.180572	2.57109e-06		0.180572	2.77881e-06		0.180572	2.94861e-06
0.183466	2.51561e-08		0.183466	2.52481e-08		0.183466	2.3469e-06		0.183466	2.56868e-06		0.183466	2.77568e-06		0.183466	2.94605e-06
0.18636	2.54752e-08		0.18636	2.55572e-08		0.18636	2.31816e-06		0.18636	2.56627e-06		0.18636	2.77254e-06		0.18636	2.94358e-06
0.189254	2.58176e-08		0.189254	2.58693e-08		0.189254	2.29499e-06		0.189254	2.56385e-06		0.189254	2.76938e-06		0.189254	2.94118e-06
0.192148	2.61833e-08		0.192148	2.61843e-08		0.192148	2.27695e-06		0.192148	2.56142e-06		0.192148	2.76621e-06		0.192148	2.93886e-06
0.195042	2.65722e-08		0.195042	2.65131e-08		0.195042	2.26366e-06		0.195042	2.55895e-06		0.195042	2.76301e-06		0.195042	2.93661e-06
0.197936	2.69848e-08		0.197936	2.68555e-08		0.197936	2.25527e-06		0.197936	2.55646e-06		0.197936	2.75977e-06		0.197936	2.93443e-06
0.20083	2.74207e-08		0.20083	2.72144e-08		0.20083	2.2517e-06		0.20083	2.55393e-06		0.20083	2.75651e-06		0.20083	2.93232e-06
0.203723	2.78755e-08		0.203723	2.75935e-08		0.203723	2.25226e-06		0.203723	2.55136e-06		0.203723	2.75323e-06		0.203723	2.9303e-06
0.206617	2.83549e-08		0.206617	2.79938e-08		0.206617	2.25683e-06		0.206617	2.54874e-06		0.206617	2.74992e-06		0.206617	2.92836e-06
0.209511	2.88639e-08		0.209511	2.8428e-08		0.209511	2.26523e-06		0.209511	2.54608e-06		0.209511	2.74659e-06		0.209511	2.92652e-06
0.212405	2.93973e-08		0.212405	2.88943e-08		0.212405	2.27698e-06		0.212405	2.54337e-06		0.212405	2.74323e-06		0.212405	2.9248e-06
0.215299	2.99501e-08		0.215299	2.93926e-08		0.215299	2.29186e-06		0.215299	2.5406e-06		0.215299	2.73983e-06		0.215299	2.92326e-06
0.215299	2.99501e-08		0.215299	2.93926e-08		0.215299	2.29186e-06		0.215299	2.5406e-06		0.215299	2.73983e-06		0.215299	2.92326e-06
0.218193	3.05286e-08		0.218193	2.99365e-08		0.218193	2.30821e-06		0.218193	2.53778e-06		0.218193	2.7364e-06		0.218193	2.92174e-06
0.221087	3.11407e-08		0.221087	3.05415e-08		0.221087	2.32371e-06		0.221087	2.53496e-06		0.221087	2.73294e-06		0.221087	2.91999e-06
0.223981	3.17869e-08		0.223981	3.12062e-08		0.223981	2.33731e-06		0.223981	2.53216e-06		0.223981	2.72943e-06		0.223981	2.91791e-06
0.226875	3.24704e-08		0.226875	3.19232e-08		0.226875	2.34857e-06		0.226875	2.52936e-06		0.226875	2.72588e-06		0.226875	2.91544e-06
0.229768	3.3202e-08		0.229768	3.27024e-08		0.229768	2.35753e-06		0.229768	2.52658e-06		0.229768	2.72229e-06		0.229768	2.91259e-06
0.232662	3.39709e-08		0.232662	3.35598e-08		0.232662	2.36442e-06		0.232662	2.52381e-06		0.232662	2.71864e-06		0.232662	2.90938e-06
0.235556	3.47768e-08		0.235556	3.44897e-08		0.235556	2.36951e-06		0.235556	2.52104e-06		0.235556	2.71494e-06		0.235556	2.90581e-06
0.23845	3.56328e-08		0.23845	3.54855e-08		0.23845	2.37307e-06		0.23845	2.51827e-06		0.23845	2.71121e-06		0.23845	2.9019e-06
0.241344	3.65279e-08		0.241344	3.65548e-08		0.241344	2.37541e-06		0.241344	2.51551e-06		0.241344	2.70748e-06		0.241344	2.89771e-06
0.244238	3.7468e-08		0.244238	3.76973e-08		0.244238	2.37681e-06		0.244238	2.51274e-06		0.244238	2.70375e-06		0.244238	2.89335e-06
0.247132	3.84542e-08		0.247132	3.89184e-08		0.247132	2.37743e-06		0.247132	2.50997e-06		0.247132	2.70001e-06		0.247132	2.88889e-06
0.250026	3.94808e-08		0.250026	4.02252e-08		0.250026	2.37741e-06		0.250026	2.5072e-06		0.250026	2.69627e-06		0.250026	2.88434e-06
0.25292	4.05606e-08		0.25292	4.16204e-08		0.25292	2.37687e-06		0.25292	2.50443e-06		0.25292	2.69251e-06		0.25292	2.87972e-06
0.255814	4.16917e-08		0.255814	4.31039e-08		0.255814	2.3759e-06		0.255814	2.50166e-06		0.255814	2.68874e-06		0.255814	2.87502e-06
0.258707	4.28759e-08		0.258707	4.46785e-08		0.258707	2.37458e-06		0.258707	2.49889e-06		0.258707	2.68495e-06		0.258707	2.87025e-06
0.261601	4.41241e-08		0.261601	4.63491e-08		0.261601	2.37298e-06		0.261601	2.49611e-06		0.261601	2.68114e-06		0.261601	2.86543e-06
0.264495	4.54419e-08		0.264495	4.81226e-08		0.264495	2.37115e-06		0.264495	2.49333e-06		0.264495	2.67732e-06		0.264495	2.86055e-06
0.267389	4.68265e-08		0.267389	5.00071e-08		0.267389	2.36914e-06		0.267389	2.49056e-06		0.267389	2.67355e-06		0.267389	2.85562e-06
0.270283	4.82834e-08		0.270283	5.20136e-08		0.270283	2.36698e-06		0.270283	2.48778e-06		0.270283	2.66981e-06		0.270283	2.85065e-06
0.273177	4.98183e-08		0.273177	5.41554e-08		0.273177	2.3647e-06		0.273177	2.485e-06		0.273177	2.66611e-06		0.273177	2.84563e-06
0.276071	5.14323e-08		0.276071	5.64453e-08		0.276071	2.36233e-06		0.276071	2.48222e-06		0.276071	2.66245e-06		0.276071	2.84057e-06
0.278965	5.3132e-08		0.278965	5.88948e-08		0.278965	2.35988e-06		0.278965	2.47943e-06		0.278965	2.65884e-06		0.278965	2.83546e-06
0.281859	5.49256e-08		0.281859	6.15142e-08		0.281859	2.35738e-06		0.281859	2.47665e-06		0.281859	2.65527e-06		0.281859	2.83029e-06
0.284752	5.6822e-08		0.284752	6.43136e-08		0.284752	2.35484e-06		0.284752	2.47386e-06		0.284752	2.65175e-06		0.284752	2.82506e-06
0.287646	5.88294e-08		0.287646	6.73095e-08		0.287646	2.35226e-06		0.287646	2.47107e-06		0.287646	2.64829e-06		0.287646	2.81985e-06
0.29054	6.09563e-08		0.29054	7.05164e-08		0.29054	2.34967e-06		0.29054	2.46827e-06		0.29054	2.64491e-06		0.29054	2.81474e-06
0.293434	6.32113e-08		0.293434	7.3941e-08		0.293434	2.34706e-06		0.293434	2.46547e-06		0.293434	2.64158e-06		0.293434	2.80974e-06
0.296328	6.56034e-08		0.296328	7.75815e-08		0.296328	2.34443e-06		0.296328	2.46269e-06		0.296328	2.63821e-06		0.296328	2.80482e-06
0.299222	6.81417e-08		0.299222	8.14396e-08		0.299222	2.34181e-06		0.299222	2.45992e-06		0.299222	2.63474e-06		0.299222	2.79999e-06
0.302116	7.08369e-08		0.302116	8.55308e-08		0.302116	2.33918e-06		0.302116	2.45715e-06		0.302116	2.63115e-06		0.302116	2.79525e-06
0.30501	7.37002e-08		0.30501	8.98765e-08		0.30501	2.33655e-06		0.30501	2.45437e-06		0.30501	2.62744e-06		0.30501	2.79058e-06
0.307904	7.67432e-08		0.307904	9.4499e-08		0.307904	2.33393e-06		0.307904	2.4516e-06		0.307904	2.62362e-06		0.307904	2.78599e-06
0.310797	7.99772e-08		0.310797	9.94208e-08		0.310797	2.33131e-06		0.310797	2.44883e-06		0.310797	2.61968e-06		0.310797	2.78146e-06
0.313691	8.34226e-08		0.313691	1.04662e-07		0.313691	2.32869e-06		0.313691	2.44605e-06		0.313691	2.61562e-06		0.313691	2.77699e-06
0.313691	8.34226e-08		0.313691	1.04662e-07		0.313691	2.32869e-06		0.313691	2.44605e-06		0.313691	2.61562e-06		0.313691	2.77699e-06
0.316585	8.71019e-08		0.316585	1.10251e-07		0.316585	2.32604e-06		0.316585	2.4432e-06		0.316585	2.61144e-06		0.316585	2.77238e-06
0.319479	9.10317e-08		0.319479	1.16206e-07		0.319479	2.32333e-06		0.319479	2.44021e-06		0.319479	2.60719e-06		0.319479	2.76748e-06
0.322373	9.52222e-08		0.322373	1.22544e-07		0.322373	2.32057e-06		0.322373	2.4371e-06		0.322373	2.6029e-06		0.322373	2.76229e-06
0.325267	9.96921e-08		0.325267	1.2928e-07		0.325267	2.31777e-06		0.325267	2.43388e-06		0.325267	2.59856e-06		0.325267	2.75687e-06
0.328161	1.04474e-07		0.328161	1.36438e-07		0.328161	2.31494e-06		0.328161	2.43056e-06		0.328161	2.59418e-06		0.328161	2.75132e-06
0.331055	1.09592e-07		0.331055	1.44037e-07		0.331055	2.31209e-06		0.331055	2.42715e-06		0.331055	2.58974e-06		0.331055	2.74567e-06
0.333949	1.1507e-07		0.333949	1.52094e-07		0.333949	2.30925e-06		0.333949	2.42367e-06		0.333949	2.58525e-06		0.333949	2.73994e-06
0.336842	1.20924e-07		0.336842	1.60638e-07		0.336842	2.3064e-06		0.336842	2.4201e-06		0.336842	2.58071e-06		0.336842	2.73414e-06
0.339736	1.27184e-07		0.339736	1.69687e-07		0.339736	2.30354e-06		0.339736	2.41646e-06		0.339736	2.57612e-06		0.339736	2.72827e-06
0.34263	1.33884e-07		0.34263	1.79267e-07		0.34263	2.30069e-06		0.34263	2.41274e-06		0.34263	2.57147e-06		0.34263	2.72235e-06
0.345524	1.41062e-07		0.345524	1.89407e-07		0.345524	2.29784e-06		0.345524	2.40894e-06		0.345524	2.5668e-06		0.345524	2.71637e-06
0.348418	1.48758e-07		0.348418	2.00158e-07		0.348418	2.29499e-06		0.348418	2.40505e-06		0.348418	2.56211e-06		0.348418	2.71034e-06
0.351312	1.57005e-07		0.351312	2.11566e-07		0.351312	2.29214e-06		0.351312	2.40106e-06		0.351312	2.55743e-06		0.351312	2.70426e-06
0.354206	1.65854e-07		0.354206	2.23638e-07		0.354206	2.28929e-06		0.354206	2.39695e-06		0.354206	2.55274e-06		0.354206	2.69813e-06
0.3571	1.75355e-07		0.3571	2.36378e-07		0.3571	2.28644e-06		0.3571	2.39281e-06		0.3571	2.54804e-06		0.3571	2.69193e-06
0.359994	1.85551e-07		0.359994	2.49827e-07		0.359994	2.2836e-06		0.359994	2.38872e-06		0.359994	2.54334e-06		0.359994	2.68568e-06
0.362887	1.96505e-07		0.362887	2.64049e-07		0.362887	2.28076e-06		0.362887	2.38468e-06		0.362887	2.53863e-06		0.362887	2.67941e-06
0.365781	2.08277e-07		0.365781	2.79105e-07		0.365781	2.27792e-06		0.365781	2.38071e-06		0.365781	2.53392e-06		0.365781	2.6732e-06
0.368675	2.20913e-07		0.368675	2.95028e-07		0.368675	2.2751e-06		0.368675	2.37679e-06		0.368675	2.52924e-06		0.368675	2.66706e-06
0.371569	2.34464e-07		0.371569	3.11824e-07		0.371569	2.27227e-06		0.371569	2.37293e-06		0.371569	2.52462e-06		0.371569	2.66099e-06
0.374463	2.48982e-07		0.374463	3.29526e-07		0.374463	2.26946e-06		0.374463	2.36913e-06		0.374463	2.52006e-06		0.374463	2.65499e-06
0.377357	2.64519e-07		0.377357	3.48183e-07		0.377357	2.26665e-06		0.377357	2.36539e-06		0.377357	2.51556e-06		0.377357	2.64908e-06
0.380251	2.81143e-07		0.380251	3.67872e-07		0.380251	2.26384e-06		0.380251	2.36171e-06		0.380251	2.51112e-06		0.380251	2.64324e-06
0.383145	2.98912e-07		0.383145	3.88689e-07		0.383145	2.26105e-06		0.383145	2.3581e-06		0.383145	2.50675e-06		0.383145	2.63748e-06
0.386039	3.17866e-07		0.386039	4.10734e-07		0.386039	2.25826e-06		0.386039	2.35456e-06		0.386039	2.50245e-06		0.386039	2.6318e-06
0.388932	3.38058e-07		0.388932	4.34049e-07		0.388932	2.25548e-06		0.388932	2.35107e-06		0.388932	2.49821e-06		0.388932	2.62619e-06
0.391826	3.59552e-07		0.391826	4.58654e-07		0.391826	2.2527e-06		0.391826	2.34765e-06		0.391826	2.49409e-06		0.391826	2.62065e-06
0.39472	3.82418e-07		0.39472	4.84639e-07		0.39472	2.24992e-06		0.39472	2.34429e-06		0.39472	2.49011e-06		0.39472	2.61516e-06
0.397614	4.06735e-07		0.397614	5.12145e-07		0.397614	2.24715e-06		0.397614	2.341e-06		0.397614	2.4863e-06		0.397614	2.60978e-06
0.400508	4.3259e-07		0.400508	5.41353e-07		0.400508	2.24438e-06		0.400508	2.33778e-06		0.400508	2.48266e-06		0.400508	2.60461e-06
0.403402	4.60073e-07		0.403402	5.72449e-07		0.403402	2.24164e-06		0.403402	2.33463e-06		0.403402	2.4792e-06		0.403402	2.59967e-06
0.403402	4.60073e-07		0.403402	5.72449e-07		0.403402	2.24164e-06		0.403402	2.33463e-06		0.403402	2.4792e-06		0.403402	2.59967e-06
0.406296	4.89277e-07		0.406296	6.05614e-07		0.406296	2.23891e-06		0.406296	2.33148e-06		0.406296	2.47577e-06		0.406296	2.59482e-06
0.40919	5.20295e-07		0.40919	6.41022e-07		0.40919	2.23615e-06		0.40919	2.32825e-06		0.40919	2.47219e-06		0.40919	2.58991e-06
0.412084	5.53218e-07		0.412084	6.78855e-07		0.412084	2.23337e-06		0.412084	2.32493e-06		0.412084	2.46849e-06		0.412084	2.58494e-06
0.414977	5.88131e-07		0.414977	7.19324e-07		0.414977	2.23056e-06		0.414977	2.32153e-06		0.414977	2.46468e-06		0.414977	2.57988e-06
0.417871	6.25118e-07		0.417871	7.62705e-07		0.417871	2.22773e-06		0.417871	2.31805e-06		0.417871	2.46075e-06		0.417871	2.57474e-06
0.420765	6.64269e-07		0.420765	8.09414e-07		0.420765	2.22487e-06		0.420765	2.31453e-06		0.420765	2.4567e-06		0.420765	2.56951e-06
0.423659	7.05706e-07		0.423659	8.59828e-07		0.423659	2.22198e-06		0.423659	2.31094e-06		0.423659	2.45253e-06		0.423659	2.56419e-06
0.426553	7.49622e-07		0.426553	9.14393e-07		0.426553	2.21908e-06		0.426553	2.3073e-06		0.426553	2.44825e-06		0.426553	2.55878e-06
0.429447	7.96251e-07		0.429447	9.73995e-07		0.429447	2.21616e-06		0.429447	2.30361e-06		0.429447	2.44387e-06		0.429447	2.55333e-06
0.432341	8.45814e-07		0.432341	1.03968e-06		0.432341	2.21322e-06		0.432341	2.29987e-06		0.432341	2.43938e-06		0.432341	2.54778e-06
0.435235	8.98551e-07		0.435235	1.11314e-06		0.435235	2.21026e-06		0.435235	2.29609e-06		0.435235	2.43481e-06		0.435235	2.54207e-06
0.438129	9.54796e-07		0.438129	1.19788e-06		0.438129	2.2073e-06		0.438129	2.29227e-06		0.438129	2.43017e-06		0.438129	2.53624e-06
0.441023	1.0151e-06		0.441023	1.29918e-06		0.441023	2.20433e-06		0.441023	2.28841e-06		0.441023	2.42547e-06		0.441023	2.53029e-06
0.443916	1.08021e-06		0.443916	1.41508e-06		0.443916	2.20135e-06		0.443916	2.28453e-06		0.443916	2.42072e-06		0.443916	2.52422e-06
0.44681	1.15088e-06		0.44681	1.5429e-06		0.44681	2.19836e-06		0.44681	2.28062e-06		0.44681	2.41591e-06		0.44681	2.51803e-06
0.449704	1.22884e-06		0.449704	1.68265e-06		0.449704	2.19536e-06		0.449704	2.27669e-06		0.449704	2.41106e-06		0.449704	2.51173e-06
0.452598	1.31762e-06		0.452598	1.8301e-06		0.452598	2.19237e-06		0.452598	2.27273e-06		0.452598	2.40617e-06		0.452598	2.5053e-06
0.455492	1.42162e-06		0.455492	1.9824e-06		0.455492	2.18937e-06		0.455492	2.26875e-06		0.455492	2.40124e-06		0.455492	2.49876e-06
0.458386	1.54106e-06		0.458386	2.13436e-06		0.458386	2.18637e-06		0.458386	2.26476e-06		0.458386	2.39628e-06		0.458386	2.49209e-06
0.46128	1.67274e-06		0.46128	2.28353e-06		0.46128	2.18336e-06		0.46128	2.26075e-06		0.46128	2.3913e-06		0.46128	2.48529e-06
0.464174	1.81311e-06		0.464174	2.43038e-06		0.464174	2.18036e-06		0.464174	2.25672e-06		0.464174	2.38629e-06		0.464174	2.47834e-06
0.467068	1.95818e-06		0.467068	2.57276e-06		0.467068	2.17736e-06		0.467068	2.25268e-06		0.467068	2.38127e-06		0.467068	2.47133e-06
0.469961	2.10607e-06		0.469961	2.70876e-06		0.469961	2.17435e-06		0.469961	2.24862e-06		0.469961	2.37623e-06		0.469961	2.46435e-06
0.472855	2.25265e-06		0.472855	2.83804e-06		0.472855	2.17136e-06		0.472855	2.24456e-06		0.472855	2.37117e-06		0.472855	2.45741e-06
0.475749	2.39487e-06		0.475749	2.95999e-06		0.475749	2.16836e-06		0.475749	2.24051e-06		0.475749	2.3661e-06		0.475749	2.45052e-06
0.478643	2.53374e-06		0.478643	3.0736e-06		0.478643	2.16536e-06		0.478643	2.23645e-06		0.478643	2.36102e-06		0.478643	2.44367e-06
0.481537	2.66722e-06		0.481537	3.17935e-06		0.481537	2.16237e-06		0.481537	2.23241e-06		0.481537	2.35594e-06		0.481537	2.43686e-06
0.484431	2.79336e-06		0.484431	3.27702e-06		0.484431	2.15938e-06		0.484431	2.22837e-06		0.484431	2.35086e-06		0.484431	2.43011e-06
0.487325	2.9124e-06		0.487325	3.36653e-06		0.487325	2.15639e-06		0.487325	2.22434e-06		0.487325	2.34578e-06		0.487325	2.42339e-06
0.490219	3.02323e-06		0.490219	3.44739e-06		0.490219	2.1534e-06		0.490219	2.22033e-06		0.490219	2.34071e-06		0.490219	2.41671e-06
0.493113	3.12494e-06		0.493113	3.51961e-06		0.493113	2.15042e-06		0.493113	2.21632e-06		0.493113	2.33563e-06		0.493113	2.41005e-06
0.496006	3.21778e-06		0.496006	3.58408e-06		0.496006	2.14743e-06		0.496006	2.21233e-06		0.496006	2.33056e-06		0.496006	2.40342e-06
0.4989	3.30192e-06		0.4989	3.64124e-06		0.4989	2.14445e-06		0.4989	2.20836e-06		0.4989	2.3255e-06		0.4989	2.39681e-06
0.501794	3.37745e-06		0.501794	3.6917e-06		0.501794	2.14147e-06		0.501794	2.2044e-06		0.501794	2.32047e-06		0.501794	2.39026e-06
0.504688	3.4447e-06		0.504688	3.73515e-06		0.504688	2.13848e-06		0.504688	2.20046e-06		0.504688	2.31546e-06		0.504688	2.38383e-06
0.507582	3.50423e-06		0.507582	3.77151e-06		0.507582	2.1355e-06		0.507582	2.19654e-06		0.507582	2.31048e-06		0.507582	2.37753e-06
0.510476	3.55609e-06		0.510476	3.80127e-06		0.510476	2.13251e-06		0.510476	2.19264e-06		0.510476	2.30553e-06		0.510476	2.37137e-06
0.51337	3.60037e-06		0.51337	3.82572e-06		0.51337	2.12952e-06		0.51337	2.18876e-06		0.51337	2.30061e-06		0.51337	2.36536e-06
0.516264	3.6367e-06		0.516264	3.84467e-06		0.516264	2.12653e-06		0.516264	2.1849e-06		0.516264	2.29572e-06		0.516264	2.35953e-06
0.519158	3.66589e-06		0.519158	3.85753e-06		0.519158	2.12352e-06		0.519158	2.18107e-06		0.519158	2.29086e-06		0.519158	2.3539e-06
0.522051	3.68864e-06		0.522051	3.86533e-06		0.522051	2.12051e-06		0.522051	2.17727e-06		0.522051	2.28606e-06		0.522051	2.34851e-06
0.524945	3.70473e-06		0.524945	3.8683e-06		0.524945	2.11747e-06		0.524945	2.17351e-06		0.524945	2.28132e-06		0.524945	2.34342e-06
0.524945	3.70473e-06		0.524945	3.8683e-06		0.524945	2.11747e-06		0.524945	2.17351e-06		0.524945	2.28132e-06		0.524945	2.34342e-06
0.527839	3.7153e-06		0.527839	3.86756e-06		0.527839	2.11443e-06		0.527839	2.16977e-06		0.527839	2.27664e-06		0.527839	2.3385e-06
0.530733	3.72099e-06		0.530733	3.86386e-06		0.530733	2.11139e-06		0.530733	2.16603e-06		0.530733	2.27196e-06		0.530733	2.3336e-06
0.533627	3.72206e-06		0.533627	3.85692e-06		0.533627	2.10835e-06		0.533627	2.1623e-06		0.533627	2.26731e-06		0.533627	2.32873e-06
0.536521	3.71927e-06		0.536521	3.84675e-06		0.536521	2.10531e-06		0.536521	2.15858e-06		0.536521	2.26266e-06		0.536521	2.32385e-06
0.539415	3.71234e-06		0.539415	3.83361e-06		0.539415	2.10227e-06		0.539415	2.15485e-06		0.539415	2.25801e-06		0.539415	2.31892e-06
0.542309	3.70153e-06		0.542309	3.81789e-06		0.542309	2.09923e-06		0.542309	2.15114e-06		0.542309	2.25337e-06		0.542309	2.31391e-06
0.545203	3.68773e-06		0.545203	3.80013e-06		0.545203	2.09619e-06		0.545203	2.14742e-06		0.545203	2.24874e-06		0.545203	2.30882e-06
0.548096	3.67085e-06		0.548096	3.7804e-06		0.548096	2.09314e-06		0.548096	2.1437e-06		0.548096	2.2441e-06		0.548096	2.30362e-06
0.55099	3.65193e-06		0.55099	3.759e-06		0.55099	2.09011e-06		0.55099	2.13998e-06		0.55099	2.23947e-06		0.55099	2.29831e-06
0.553884	3.63156e-06		0.553884	3.73614e-06		0.553884	2.08708e-06		0.553884	2.13626e-06		0.553884	2.23482e-06		0.553884	2.29288e-06
0.556778	3.6088e-06		0.556778	3.71168e-06		0.556778	2.08406e-06		0.556778	2.13253e-06		0.556778	2.23017e-06		0.556778	2.28732e-06
0.559672	3.58438e-06		0.559672	3.68641e-06		0.559672	2.08104e-06		0.559672	2.1288e-06		0.559672	2.22551e-06		0.559672	2.28162e-06
0.562566	3.55921e-06		0.562566	3.66095e-06		0.562566	2.07803e-06		0.562566	2.12507e-06		0.562566	2.22083e-06		0.562566	2.27576e-06
0.56546	3.53253e-06		0.56546	3.63489e-06		0.56546	2.07502e-06		0.56546	2.12133e-06		0.56546	2.21616e-06		0.56546	2.26974e-06
0.568354	3.50429e-06		0.568354	3.60799e-06		0.568354	2.07201e-06		0.568354	2.11758e-06		0.568354	2.21149e-06		0.568354	2.26353e-06
0.571248	3.47563e-06		0.571248	3.58083e-06		0.571248	2.06901e-06		0.571248	2.11382e-06		0.571248	2.20682e-06		0.571248	2.25711e-06
0.574142	3.44685e-06		0.574142	3.55387e-06		0.574142	2.06601e-06		0.574142	2.11006e-06		0.574142	2.20215e-06		0.574142	2.25061e-06
0.577035	3.4171e-06		0.577035	3.52681e-06		0.577035	2.06301e-06		0.577035	2.10628e-06		0.577035	2.19748e-06		0.577035	2.24415e-06
0.579929	3.38643e-06		0.579929	3.49928e-06		0.579929	2.06001e-06		0.579929	2.1025e-06		0.579929	2.1928e-06		0.579929	2.23774e-06
0.582823	3.35598e-06		0.582823	3.47103e-06		0.582823	2.05701e-06		0.582823	2.09872e-06		0.582823	2.18811e-06		0.582823	2.23139e-06
0.585717	3.32612e-06		0.585717	3.4428e-06		0.585717	2.05401e-06		0.585717	2.09495e-06		0.585717	2.18342e-06		0.585717	2.2251e-06
0.588611	3.29618e-06		0.588611	3.41531e-06		0.588611	2.05102e-06		0.588611	2.09117e-06		0.588611	2.17875e-06		0.588611	2.21887e-06
0.591505	3.26537e-06		0.591505	3.3882e-06		0.591505	2.04802e-06		0.591505	2.0874e-06		0.591505	2.17408e-06		0.591505	2.2127e-06
0.594399	3.23461e-06		0.594399	3.36117e-06		0.594399	2.04502e-06		0.594399	2.08364e-06		0.594399	2.16943e-06		0.594399	2.2066e-06
0.597293	3.20513e-06		0.597293	3.33396e-06		0.597293	2.04202e-06		0.597293	2.07987e-06		0.597293	2.16479e-06		0.597293	2.20055e-06
0.600186	3.17659e-06		0.600186	3.30662e-06		0.600186	2.03902e-06		0.600186	2.07611e-06		0.600186	2.16016e-06		0.600186	2.19457e-06
0.60308	3.14856e-06		0.60308	3.28e-06		0.60308	2.03602e-06		0.60308	2.07235e-06		0.60308	2.15554e-06		0.60308	2.18866e-06
0.605974	3.12046e-06		0.605974	3.25449e-06		0.605974	2.03301e-06		0.605974	2.06859e-06		0.605974	2.15093e-06		0.605974	2.1828e-06
0.608868	3.0917e-06		0.608868	3.22969e-06		0.608868	2.03e-06		0.608868	2.06484e-06		0.608868	2.14633e-06		0.608868	2.17701e-06
0.611762	3.06327e-06		0.611762	3.20531e-06		0.611762	2.02699e-06		0.611762	2.06109e-06		0.611762	2.14177e-06		0.611762	2.17127e-06
0.614656	3.03618e-06		0.614656	3.18124e-06		0.614656	2.02397e-06		0.614656	2.05734e-06		0.614656	2.13723e-06		0.614656	2.16563e-06
0.61755	3.01003e-06		0.61755	3.15734e-06		0.61755	2.02096e-06		0.61755	2.05359e-06		0.61755	2.13273e-06		0.61755	2.16014e-06
0.620444	2.98448e-06		0.620444	3.13313e-06		0.620444	2.01796e-06		0.620444	2.04984e-06		0.620444	2.12826e-06		0.620444	2.15482e-06
0.623338	2.95922e-06		0.623338	3.1091e-06		0.623338	2.01496e-06		0.623338	2.04609e-06		0.623338	2.12381e-06		0.623338	2.14965e-06
0.626231	2.93385e-06		0.626231	3.08606e-06		0.626231	2.01198e-06		0.626231	2.04234e-06		0.626231	2.1194e-06		0.626231	2.14464e-06
0.629125	2.90798e-06		0.629125	3.06389e-06		0.629125	2.009e-06		0.629125	2.03859e-06		0.629125	2.11503e-06		0.629125	2.1398e-06
0.632019	2.88185e-06		0.632019	3.04236e-06		0.632019	2.00604e-06		0.632019	2.03485e-06		0.632019	2.11069e-06		0.632019	2.13512e-06
0.634913	2.85637e-06		0.634913	3.0212e-06		0.634913	2.00309e-06		0.634913	2.03111e-06		0.634913	2.10641e-06		0.634913	2.13063e-06
0.637807	2.83186e-06		0.637807	3.00019e-06		0.637807	2.00015e-06		0.637807	2.02741e-06		0.637807	2.1022e-06		0.637807	2.12635e-06
0.640701	2.808e-06		0.640701	2.97907e-06		0.640701	1.99723e-06		0.640701	2.02375e-06		0.640701	2.09807e-06		0.640701	2.12231e-06
0.643595	2.78435e-06		0.643595	2.95743e-06		0.643595	1.99432e-06		0.643595	2.02014e-06		0.643595	2.09403e-06		0.643595	2.1186e-06
0.643595	2.78435e-06		0.643595	2.95743e-06		0.643595	1.99432e-06		0.643595	2.02014e-06		0.643595	2.09403e-06		0.643595	2.1186e-06
0.646489	2.76108e-06		0.646489	2.93558e-06		0.646489	1.99143e-06		0.646489	2.01658e-06		0.646489	2.09007e-06		0.646489	2.11509e-06
0.649383	2.73856e-06		0.649383	2.91413e-06		0.649383	1.98855e-06		0.649383	2.01304e-06		0.649383	2.08613e-06		0.649383	2.11161e-06
0.652277	2.71679e-06		0.652277	2.89309e-06		0.652277	1.98567e-06		0.652277	2.00954e-06		0.652277	2.0822e-06		0.652277	2.10812e-06
0.65517	2.69568e-06		0.65517	2.87254e-06		0.65517	1.9828e-06		0.65517	2.00605e-06		0.65517	2.07829e-06		0.65517	2.10463e-06
0.658064	2.67521e-06		0.658064	2.85253e-06		0.658064	1.97993e-06		0.658064	2.00258e-06		0.658064	2.07438e-06		0.658064	2.10117e-06
0.660958	2.65539e-06		0.660958	2.833e-06		0.660958	1.97705e-06		0.660958	1.99912e-06		0.660958	2.07047e-06		0.660958	2.0977e-06
0.663852	2.63617e-06		0.663852	2.81398e-06		0.663852	1.97418e-06		0.663852	1.99567e-06		0.663852	2.06656e-06		0.663852	2.09422e-06
0.666746	2.61762e-06		0.666746	2.79549e-06		0.666746	1.9713e-06		0.666746	1.99222e-06		0.666746	2.06265e-06		0.666746	2.09072e-06
0.66964	2.59971e-06		0.66964	2.77743e-06		0.66964	1.96842e-06		0.66964	1.98877e-06		0.66964	2.05873e-06		0.66964	2.08717e-06
0.672534	2.58232e-06		0.672534	2.75982e-06		0.672534	1.96553e-06		0.672534	1.98532e-06		0.672534	2.05479e-06		0.672534	2.08357e-06
0.675428	2.56549e-06		0.675428	2.74269e-06		0.675428	1.96264e-06		0.675428	1.98187e-06		0.675428	2.05085e-06		0.675428	2.07993e-06
0.678322	2.54928e-06		0.678322	2.72596e-06		0.678322	1.95975e-06		0.678322	1.97842e-06		0.678322	2.04689e-06		0.678322	2.07622e-06
0.681215	2.53361e-06		0.681215	2.70962e-06		0.681215	1.95684e-06		0.681215	1.97497e-06		0.681215	2.04292e-06		0.681215	2.07245e-06
0.684109	2.51842e-06		0.684109	2.6937e-06		0.684109	1.95394e-06		0.684109	1.97152e-06		0.684109	2.03895e-06		0.684109	2.06861e-06
0.687003	2.50368e-06		0.687003	2.67819e-06		0.687003	1.95103e-06		0.687003	1.96806e-06		0.687003	2.03498e-06		0.687003	2.06469e-06
0.689897	2.48937e-06		0.689897	2.66307e-06		0.689897	1.94813e-06		0.689897	1.9646e-06		0.689897	2.031e-06		0.689897	2.06069e-06
0.692791	2.47544e-06		0.692791	2.64831e-06		0.692791	1.94524e-06		0.692791	1.96113e-06		0.692791	2.02703e-06		0.692791	2.05659e-06
0.695685	2.46181e-06		0.695685	2.6339e-06		0.695685	1.94235e-06		0.695685	1.95766e-06		0.695685	2.02304e-06		0.695685	2.05237e-06
0.698579	2.4485e-06		0.698579	2.61982e-06		0.698579	1.93947e-06		0.698579	1.95419e-06		0.698579	2.01905e-06		0.698579	2.04808e-06
0.701473	2.43554e-06		0.701473	2.60608e-06		0.701473	1.93659e-06		0.701473	1.95072e-06		0.701473	2.01505e-06		0.701473	2.04376e-06
0.704367	2.42286e-06		0.704367	2.59264e-06		0.704367	1.93371e-06		0.704367	1.94724e-06		0.704367	2.01104e-06		0.704367	2.03939e-06
0.70726	2.41038e-06		0.70726	2.57948e-06		0.70726	1.93084e-06		0.70726	1.94377e-06		0.70726	2.00703e-06		0.70726	2.03496e-06
0.710154	2.39812e-06		0.710154	2.56658e-06		0.710154	1.92796e-06		0.710154	1.94028e-06		0.710154	2.00303e-06		0.710154	2.03044e-06
0.713048	2.38617e-06		0.713048	2.55386e-06		0.713048	1.92508e-06		0.713048	1.93678e-06		0.713048	1.99903e-06		0.713048	2.0258e-06
0.715942	2.37456e-06		0.715942	2.54125e-06		0.715942	1.9222e-06		0.715942	1.93326e-06		0.715942	1.99504e-06		0.715942	2.02099e-06
0.715942	2.37456e-06		0.715942	2.54125e-06		0.715942	1.9222e-06		0.715942	1.93326e-06		0.715942	1.99504e-06		0.715942	2.02099e-06
0.718836	2.36322e-06		0.718836	2.5288e-06		0.718836	1.91931e-06		0.718836	1.92974e-06		0.718836	1.99105e-06		0.718836	2.01607e-06
0.72173	2.35215e-06		0.72173	2.51657e-06		0.72173	1.91643e-06		0.72173	1.9262e-06		0.72173	1.98706e-06		0.72173	2.01113e-06
0.724624	2.34129e-06		0.724624	2.50456e-06		0.724624	1.91354e-06		0.724624	1.92265e-06		0.724624	1.98304e-06		0.724624	2.00617e-06
0.727518	2.33067e-06		0.727518	2.49273e-06		0.727518	1.91065e-06		0.727518	1.91909e-06		0.727518	1.97902e-06		0.727518	2.00119e-06
0.730412	2.3203e-06		0.730412	2.48104e-06		0.730412	1.90775e-06		0.730412	1.91551e-06		0.730412	1.97497e-06		0.730412	1.99619e-06
0.733305	2.31013e-06		0.733305	2.46946e-06		0.733305	1.90484e-06		0.733305	1.91191e-06		0.733305	1.97089e-06		0.733305	1.99116e-06
0.736199	2.30014e-06		0.736199	2.45803e-06		0.736199	1.90193e-06		0.736199	1.90829e-06		0.736199	1.96677e-06		0.736199	1.98612e-06
0.739093	2.29028e-06		0.739093	2.44677e-06		0.739093	1.899e-06		0.739093	1.90464e-06		0.739093	1.9626e-06		0.739093	1.98106e-06
0.741987	2.28053e-06		0.741987	2.43564e-06		0.741987	1.89606e-06		0.741987	1.90096e-06		0.741987	1.95837e-06		0.741987	1.97595e-06
0.744881	2.2709e-06		0.744881	2.42461e-06		0.744881	1.8931e-06		0.744881	1.89724e-06		0.744881	1.95407e-06		0.744881	1.97076e-06
0.747775	2.26142e-06		0.747775	2.41364e-06		0.747775	1.89012e-06		0.747775	1.89348e-06		0.747775	1.94969e-06		0.747775	1.96546e-06
0.750669	2.25205e-06		0.750669	2.40271e-06		0.750669	1.8871e-06		0.750669	1.88966e-06		0.750669	1.94523e-06		0.750669	1.96004e-06
0.753563	2.24275e-06		0.753563	2.39182e-06		0.753563	1.88405e-06		0.753563	1.88578e-06		0.753563	1.94066e-06		0.753563	1.95449e-06
0.756457	2.23349e-06		0.756457	2.38098e-06		0.756457	1.88095e-06		0.756457	1.88181e-06		0.756457	1.93597e-06		0.756457	1.94881e-06
0.75935	2.22422e-06		0.75935	2.37015e-06		0.75935	1.87777e-06		0.75935	1.87771e-06		0.75935	1.93113e-06		0.75935	1.94297e-06
0.762244	2.21493e-06		0.762244	2.35928e-06		0.762244	1.8745e-06		0.762244	1.87349e-06		0.762244	1.92614e-06		0.762244	1.93697e-06
0.765138	2.20562e-06		0.765138	2.34834e-06		0.765138	1.87112e-06		0.765138	1.86912e-06		0.765138	1.92096e-06		0.765138	1.93079e-06
0.768032	2.19629e-06		0.768032	2.33726e-06		0.768032	1.86762e-06		0.768032	1.86458e-06		0.768032	1.91559e-06		0.768032	1.92442e-06
0.770926	2.18691e-06		0.770926	2.32606e-06		0.770926	1.86399e-06		0.770926	1.85987e-06		0.770926	1.91e-06		0.770926	1.91785e-06
0.77382	2.17742e-06		0.77382	2.31474e-06		0.77382	1.86021e-06		0.77382	1.85498e-06		0.77382	1.90419e-06		0.77382	1.91106e-06
0.776714	2.1678e-06		0.776714	2.30327e-06		0.776714	1.85626e-06		0.776714	1.84989e-06		0.776714	1.89814e-06		0.776714	1.90405e-06
0.779608	2.15801e-06		0.779608	2.29161e-06		0.779608	1.85214e-06		0.779608	1.8446e-06		0.779608	1.89183e-06		0.779608	1.89678e-06
0.782502	2.14804e-06		0.782502	2.27974e-06		0.782502	1.84783e-06		0.782502	1.83911e-06		0.782502	1.88525e-06		0.782502	1.88916e-06
0.785396	2.13789e-06		0.785396	2.26763e-06		0.785396	1.84333e-06		0.785396	1.83341e-06		0.785396	1.8784e-06		0.785396	1.88117e-06
0.788289	2.12759e-06		0.788289	2.25532e-06		0.788289	1.83863e-06		0.788289	1.82752e-06		0.788289	1.87129e-06		0.788289	1.87282e-06
0.791183	2.11712e-06		0.791183	2.24288e-06		0.791183	1.83373e-06		0.791183	1.82144e-06		0.791183	1.8639e-06		0.791183	1.86412e-06
0.794077	2.10651e-06		0.794077	2.23033e-06		0.794077	1.82864e-06		0.794077	1.81519e-06		0.794077	1.85626e-06		0.794077	1.85507e-06
0.796971	2.09576e-06		0.796971	2.21772e-06		0.796971	1.82334e-06		0.796971	1.80876e-06		0.796971	1.84835e-06		0.796971	1.84569e-06
0.799865	2.0849e-06		0.799865	2.20506e-06		0.799865	1.81784e-06		0.799865	1.80217e-06		0.799865	1.84018e-06		0.799865	1.83596e-06
0.799865	2.0849e-06		0.799865	2.20506e-06		0.799865	1.81784e-06		0.799865	1.80217e-06		0.799865	1.84018e-06		0.799865	1.83596e-06
0.802759	2.07393e-06		0.802759	2.19229e-06		0.802759	1.81211e-06		0.802759	1.79534e-06		0.802759	1.83172e-06		0.802759	1.82589e-06
0.805653	2.06286e-06		0.805653	2.17937e-06		0.805653	1.80613e-06		0.805653	1.78818e-06		0.805653	1.82293e-06		0.805653	1.81545e-06
0.808547	2.05171e-06		0.808547	2.16634e-06		0.808547	1.79989e-06		0.808547	1.78068e-06		0.808547	1.81381e-06		0.808547	1.80463e-06
0.811441	2.04052e-06		0.811441	2.15321e-06		0.811441	1.79334e-06		0.811441	1.77285e-06		0.811441	1.80436e-06		0.811441	1.79343e-06
0.814334	2.02929e-06		0.814334	2.13999e-06		0.814334	1.78642e-06		0.814334	1.76467e-06		0.814334	1.79457e-06		0.814334	1.78186e-06
0.817228	2.01804e-06		0.817228	2.12667e-06		0.817228	1.77911e-06		0.817228	1.75614e-06		0.817228	1.78444e-06		0.817228	1.76994e-06
0.820122	2.00676e-06		0.820122	2.11325e-06		0.820122	1.7714e-06		0.820122	1.74724e-06		0.820122	1.77398e-06		0.820122	1.75766e-06
0.823016	1.99547e-06		0.823016	2.09975e-06		0.823016	1.76326e-06		0.823016	1.73798e-06		0.823016	1.76317e-06		0.823016	1.74505e-06
0.82591	1.98418e-06		0.82591	2.08616e-06		0.82591	1.7547e-06		0.82591	1.72835e-06		0.82591	1.75203e-06		0.82591	1.73211e-06
0.828804	1.97289e-06		0.828804	2.07247e-06		0.828804	1.7457e-06		0.828804	1.71834e-06		0.828804	1.74056e-06		0.828804	1.71885e-06
0.831698	1.96159e-06		0.831698	2.05867e-06		0.831698	1.73626e-06		0.831698	1.70795e-06		0.831698	1.72877e-06		0.831698	1.7053e-06
0.834592	1.95026e-06		0.834592	2.04477e-06		0.834592	1.72639e-06		0.834592	1.69718e-06		0.834592	1.71668e-06		0.834592	1.69148e-06
0.837486	1.93888e-06		0.837486	2.03081e-06		0.837486	1.71611e-06		0.837486	1.68606e-06		0.837486	1.70432e-06		0.837486	1.67744e-06
0.840379	1.9275e-06		0.840379	2.01684e-06		0.840379	1.70541e-06		0.840379	1.6746e-06		0.840379	1.69171e-06		0.840379	1.66322e-06
0.843273	1.91618e-06		0.843273	2.00288e-06		0.843273	1.69428e-06		0.843273	1.66284e-06		0.843273	1.6789e-06		0.843273	1.64887e-06
0.846167	1.90494e-06		0.846167	1.98898e-06		0.846167	1.68277e-06		0.846167	1.65084e-06		0.846167	1.66593e-06		0.846167	1.63443e-06
0.849061	1.89382e-06		0.849061	1.97518e-06		0.849061	1.67094e-06		0.849061	1.63864e-06		0.849061	1.65287e-06		0.849061	1.61998e-06
0.851955	1.88285e-06		0.851955	1.9616e-06		0.851955	1.65886e-06		0.851955	1.62632e-06		0.851955	1.63978e-06		0.851955	1.60558e-06
0.854849	1.87209e-06		0.854849	1.94834e-06		0.854849	1.64662e-06		0.854849	1.61395e-06		0.854849	1.62675e-06		0.854849	1.59134e-06
0.857743	1.8616e-06		0.857743	1.93552e-06		0.857743	1.63434e-06		0.857743	1.60164e-06		0.857743	1.61387e-06		0.857743	1.57737e-06
0.860637	1.85152e-06		0.860637	1.92312e-06		0.860637	1.62214e-06		0.860637	1.58951e-06		0.860637	1.60128e-06		0.860637	1.56379e-06
0.863531	1.84197e-06		0.863531	1.91116e-06		0.863531	1.6102e-06		0.863531	1.57772e-06		0.863531	1.58913e-06		0.863531	1.55077e-06
0.866424	1.83311e-06		0.866424	1.89987e-06		0.866424	1.59877e-06		0.866424	1.56651e-06		0.866424	1.57764e-06		0.866424	1.53851e-06
0.869318	1.82515e-06		0.869318	1.88967e-06		0.869318	1.5882e-06		0.869318	1.55626e-06		0.869318	1.56714e-06		0.869318	1.52735e-06
0.872212	1.81844e-06		0.872212	1.88105e-06		0.872212	1.57902e-06		0.872212	1.54743e-06		0.872212	1.55813e-06		0.872212	1.51782e-06
0.875106	1.81352e-06		0.875106	1.8747e-06		0.875106	1.57209e-06		0.875106	1.54083e-06		0.875106	1.55142e-06		0.875106	1.51074e-06
0.878	1.81162e-06		0.878	1.87223e-06		0.878	1.56932e-06		0.878	1.53821e-06		0.878	1.54876e-06		0.878	1.50796e-06

## Sheet: no distribution 
SN 0			SN 0.2			SN 0.4			SN 0.6			SN 0.8			SN 1
Axial distance	no mass fraction		Axial distance	no mass fraction		Axial distance	no mass fraction		Axial distance	no mass fraction		Axial distance	no mass fraction		Axial distance	no mass fraction
0.00115113	1.48424e-06		0.00115113	1.45813e-06		0.00115113	1.56127e-06		0.00115113	3.68721e-07		0.00115113	1.24962e-07		0.00115113	1.25444e-07
0.00404502	1.98496e-06		0.00404502	1.95997e-06		0.00404502	2.02852e-06		0.00404502	4.2194e-07		0.00404502	1.40087e-07		0.00404502	1.34522e-07
0.00693891	2.58435e-06		0.00693891	2.5723e-06		0.00693891	2.47881e-06		0.00693891	4.78646e-07		0.00693891	1.5292e-07		0.00693891	1.38497e-07
0.0098328	3.28678e-06		0.0098328	3.29567e-06		0.0098328	2.86836e-06		0.0098328	5.39995e-07		0.0098328	1.64094e-07		0.0098328	1.38258e-07
0.0127267	4.09002e-06		0.0127267	4.11338e-06		0.0127267	3.16249e-06		0.0127267	6.01832e-07		0.0127267	1.74047e-07		0.0127267	1.34958e-07
0.0156206	5.008e-06		0.0156206	5.02774e-06		0.0156206	3.35284e-06		0.0156206	6.53308e-07		0.0156206	1.82081e-07		0.0156206	1.29718e-07
0.0185145	6.01132e-06		0.0185145	5.98451e-06		0.0185145	3.45098e-06		0.0185145	6.89076e-07		0.0185145	1.88181e-07		0.0185145	1.23132e-07
0.0214084	7.03312e-06		0.0214084	6.88211e-06		0.0214084	3.47702e-06		0.0214084	7.08514e-07		0.0214084	1.92031e-07		0.0214084	1.15208e-07
0.0243023	8.05596e-06		0.0243023	7.65953e-06		0.0243023	3.46788e-06		0.0243023	7.12151e-07		0.0243023	1.91869e-07		0.0243023	1.06072e-07
0.0271961	9.01416e-06		0.0271961	8.28137e-06		0.0271961	3.45537e-06		0.0271961	7.01283e-07		0.0271961	1.87079e-07		0.0271961	9.6329e-08
0.03009	9.81864e-06		0.03009	8.73115e-06		0.03009	3.4521e-06		0.03009	6.81441e-07		0.03009	1.77914e-07		0.03009	8.70915e-08
0.0329839	1.04424e-05		0.0329839	9.00474e-06		0.0329839	3.4565e-06		0.0329839	6.54368e-07		0.0329839	1.66692e-07		0.0329839	7.93442e-08
0.0358778	1.08813e-05		0.0358778	9.11447e-06		0.0358778	3.46165e-06		0.0358778	6.19719e-07		0.0358778	1.54872e-07		0.0358778	7.401e-08
0.0387717	1.11428e-05		0.0387717	9.08555e-06		0.0387717	3.46185e-06		0.0387717	5.81387e-07		0.0387717	1.43395e-07		0.0387717	7.21368e-08
0.0416656	1.12424e-05		0.0416656	8.9474e-06		0.0416656	3.45594e-06		0.0416656	5.43256e-07		0.0416656	1.3471e-07		0.0416656	7.37882e-08
0.0445595	1.12043e-05		0.0445595	8.72989e-06		0.0445595	3.44511e-06		0.0445595	5.07604e-07		0.0445595	1.31215e-07		0.0445595	7.90226e-08
0.0474534	1.10568e-05		0.0474534	8.4635e-06		0.0474534	3.43085e-06		0.0474534	4.7509e-07		0.0474534	1.34153e-07		0.0474534	8.87247e-08
0.0503473	1.08258e-05		0.0503473	8.17955e-06		0.0503473	3.41378e-06		0.0503473	4.47984e-07		0.0503473	1.45627e-07		0.0503473	1.03813e-07
0.0532412	1.05353e-05		0.0532412	7.90775e-06		0.0532412	3.39331e-06		0.0532412	4.30934e-07		0.0532412	1.70846e-07		0.0532412	1.24877e-07
0.056135	1.02076e-05		0.056135	7.67546e-06		0.056135	3.37007e-06		0.056135	4.3188e-07		0.056135	2.18143e-07		0.056135	1.52362e-07
0.0590289	9.86403e-06		0.0590289	7.50562e-06		0.0590289	3.35172e-06		0.0590289	4.75755e-07		0.0590289	3.02858e-07		0.0590289	1.868e-07
0.0619228	9.5248e-06		0.0619228	7.41407e-06		0.0619228	3.33546e-06		0.0619228	6.36478e-07		0.0619228	4.61012e-07		0.0619228	2.2929e-07
0.0648167	9.20868e-06		0.0648167	7.4057e-06		0.0648167	3.31227e-06		0.0648167	1.09001e-06		0.0648167	7.84884e-07		0.0648167	2.83178e-07
0.0677106	8.93253e-06		0.0677106	7.47634e-06		0.0677106	3.28753e-06		0.0677106	2.24549e-06		0.0677106	1.46509e-06		0.0677106	3.57715e-07
0.0706045	8.7104e-06		0.0706045	7.61981e-06		0.0706045	3.2588e-06		0.0706045	4.77697e-06		0.0706045	2.9303e-06		0.0706045	4.75823e-07
0.0734984	8.55271e-06		0.0734984	7.82735e-06		0.0734984	3.22046e-06		0.0734984	9.71523e-06		0.0734984	5.92869e-06		0.0734984	6.92261e-07
0.0763923	8.46609e-06		0.0763923	8.08563e-06		0.0763923	3.17931e-06		0.0763923	1.85398e-05		0.0763923	1.14409e-05		0.0763923	1.12947e-06
0.0792862	8.45307e-06		0.0792862	8.37876e-06		0.0792862	3.13396e-06		0.0792862	3.47373e-05		0.0792862	2.13843e-05		0.0792862	2.02288e-06
0.0821801	8.51083e-06		0.0821801	8.69022e-06		0.0821801	3.07943e-06		0.0821801	6.36391e-05		0.0821801	3.90441e-05		0.0821801	3.79961e-06
0.085074	8.6356e-06		0.085074	9.00433e-06		0.085074	3.02144e-06		0.085074	0.000110103		0.085074	6.87074e-05		0.085074	7.22073e-06
0.085074	8.6356e-06		0.085074	9.00433e-06		0.085074	3.02144e-06		0.085074	0.000110103		0.085074	6.87074e-05		0.085074	7.22073e-06
0.0879678	8.82475e-06		0.0879678	9.30792e-06		0.0879678	2.96022e-06		0.0879678	0.000176184		0.0879678	0.000114619		0.0879678	1.35364e-05
0.0908617	9.07439e-06		0.0908617	9.59065e-06		0.0908617	2.8953e-06		0.0908617	0.000257783		0.0908617	0.000178276		0.0908617	2.46002e-05
0.0937556	9.38414e-06		0.0937556	9.84422e-06		0.0937556	2.82831e-06		0.0937556	0.000345011		0.0937556	0.000255475		0.0937556	4.2974e-05
0.0966495	9.74066e-06		0.0966495	1.00632e-05		0.0966495	2.75903e-06		0.0966495	0.000424263		0.0966495	0.000336112		0.0966495	7.18115e-05
0.0995434	1.01279e-05		0.0995434	1.02466e-05		0.0995434	2.69211e-06		0.0995434	0.000450294		0.0995434	0.000402411		0.0995434	0.000114131
0.102437	1.05402e-05		0.102437	1.03955e-05		0.102437	2.65697e-06		0.102437	0.000416244		0.102437	0.000415747		0.102437	0.000171421
0.105331	1.09667e-05		0.105331	1.05121e-05		0.105331	2.72611e-06		0.105331	0.00036687		0.105331	0.000378785		0.105331	0.000242177
0.108225	1.13961e-05		0.108225	1.06007e-05		0.108225	3.105e-06		0.108225	0.000318907		0.108225	0.00033337		0.108225	0.000321689
0.111119	1.18185e-05		0.111119	1.06682e-05		0.111119	4.27418e-06		0.111119	0.000276903		0.111119	0.000293264		0.111119	0.000401437
0.114013	1.22311e-05		0.114013	1.07203e-05		0.114013	7.16535e-06		0.114013	0.000242348		0.114013	0.0002601		0.114013	0.000441924
0.116907	1.26201e-05		0.116907	1.07638e-05		0.116907	1.32344e-05		0.116907	0.000213798		0.116907	0.000233458		0.116907	0.000427591
0.119801	1.29781e-05		0.119801	1.08065e-05		0.119801	2.45307e-05		0.119801	0.000189944		0.119801	0.000212367		0.119801	0.000391994
0.122695	1.33017e-05		0.122695	1.08553e-05		0.122695	4.32458e-05		0.122695	0.000170252		0.122695	0.000195666		0.122695	0.000355063
0.125588	1.35841e-05		0.125588	1.09175e-05		0.125588	7.27153e-05		0.125588	0.000154129		0.125588	0.000182372		0.125588	0.000322658
0.128482	1.38296e-05		0.128482	1.09988e-05		0.128482	0.000116477		0.128482	0.000140984		0.128482	0.000171843		0.128482	0.000295804
0.131376	1.40375e-05		0.131376	1.1104e-05		0.131376	0.00017588		0.131376	0.000130287		0.131376	0.000163592		0.131376	0.000274214
0.13427	1.42076e-05		0.13427	1.12379e-05		0.13427	0.000249986		0.13427	0.000121598		0.13427	0.000157126		0.13427	0.000256921
0.137164	1.43409e-05		0.137164	1.14058e-05		0.137164	0.000335523		0.137164	0.000114576		0.137164	0.000152062		0.137164	0.000243088
0.140058	1.444e-05		0.140058	1.16055e-05		0.140058	0.000427579		0.140058	0.000108937		0.140058	0.000148091		0.140058	0.000232159
0.142952	1.45094e-05		0.142952	1.18361e-05		0.142952	0.000518714		0.142952	0.000104424		0.142952	0.000144971		0.142952	0.000223456
0.145846	1.45531e-05		0.145846	1.2104e-05		0.145846	0.000570461		0.145846	0.000100827		0.145846	0.000142503		0.145846	0.000216472
0.14874	1.45746e-05		0.14874	1.24035e-05		0.14874	0.000561068		0.14874	9.79772e-05		0.14874	0.00014053		0.14874	0.00021091
0.151633	1.45776e-05		0.151633	1.27284e-05		0.151633	0.000515856		0.151633	9.57306e-05		0.151633	0.000138931		0.151633	0.000206531
0.154527	1.45658e-05		0.154527	1.30832e-05		0.154527	0.000456392		0.154527	9.39654e-05		0.154527	0.00013761		0.154527	0.000203047
0.157421	1.45433e-05		0.157421	1.34605e-05		0.157421	0.000395101		0.157421	9.25797e-05		0.157421	0.000136493		0.157421	0.000200232
0.160315	1.45138e-05		0.160315	1.38563e-05		0.160315	0.000337908		0.160315	9.14895e-05		0.160315	0.000135524		0.160315	0.000197918
0.163209	1.44801e-05		0.163209	1.4266e-05		0.163209	0.000287545		0.163209	9.06264e-05		0.163209	0.000134659		0.163209	0.000195976
0.166103	1.44456e-05		0.166103	1.46803e-05		0.166103	0.000244627		0.166103	8.99354e-05		0.166103	0.000133869		0.166103	0.000194304
0.166103	1.44456e-05		0.166103	1.46803e-05		0.166103	0.000244627		0.166103	8.99354e-05		0.166103	0.000133869		0.166103	0.000194304
0.168997	1.44144e-05		0.168997	1.51005e-05		0.168997	0.000207952		0.168997	8.93668e-05		0.168997	0.000133149		0.168997	0.00019289
0.171891	1.43894e-05		0.171891	1.55257e-05		0.171891	0.000176428		0.171891	8.88824e-05		0.171891	0.000132497		0.171891	0.000191724
0.174785	1.43733e-05		0.174785	1.59471e-05		0.174785	0.000149694		0.174785	8.84587e-05		0.174785	0.000131895		0.174785	0.000190745
0.177678	1.4369e-05		0.177678	1.63597e-05		0.177678	0.00012732		0.177678	8.80781e-05		0.177678	0.00013133		0.177678	0.00018991
0.180572	1.4379e-05		0.180572	1.67703e-05		0.180572	0.000108745		0.180572	8.77273e-05		0.180572	0.000130791		0.180572	0.00018919
0.183466	1.44049e-05		0.183466	1.71708e-05		0.183466	9.34887e-05		0.183466	8.73966e-05		0.183466	0.000130272		0.183466	0.000188563
0.18636	1.44489e-05		0.18636	1.75571e-05		0.18636	8.10977e-05		0.18636	8.70789e-05		0.18636	0.000129768		0.18636	0.000188013
0.189254	1.45121e-05		0.189254	1.79285e-05		0.189254	7.11945e-05		0.189254	8.67692e-05		0.189254	0.000129273		0.189254	0.000187527
0.192148	1.45961e-05		0.192148	1.82803e-05		0.192148	6.35143e-05		0.192148	8.64641e-05		0.192148	0.000128786		0.192148	0.000187088
0.195042	1.47014e-05		0.195042	1.86204e-05		0.195042	5.77806e-05		0.195042	8.6161e-05		0.195042	0.000128302		0.195042	0.000186687
0.197936	1.48293e-05		0.197936	1.89454e-05		0.197936	5.36619e-05		0.197936	8.58583e-05		0.197936	0.000127821		0.197936	0.00018632
0.20083	1.498e-05		0.20083	1.92547e-05		0.20083	5.0882e-05		0.20083	8.55545e-05		0.20083	0.000127342		0.20083	0.000185987
0.203723	1.51525e-05		0.203723	1.95498e-05		0.203723	4.92154e-05		0.203723	8.52488e-05		0.203723	0.000126869		0.203723	0.000185685
0.206617	1.53492e-05		0.206617	1.98295e-05		0.206617	4.84639e-05		0.206617	8.494e-05		0.206617	0.0001264		0.206617	0.000185416
0.209511	1.55722e-05		0.209511	2.01017e-05		0.209511	4.84692e-05		0.209511	8.46273e-05		0.209511	0.000125935		0.209511	0.000185182
0.212405	1.5819e-05		0.212405	2.03651e-05		0.212405	4.91355e-05		0.212405	8.43088e-05		0.212405	0.000125473		0.212405	0.000184988
0.215299	1.60868e-05		0.215299	2.06194e-05		0.215299	5.04031e-05		0.215299	8.3982e-05		0.215299	0.000125015		0.215299	0.000184846
0.215299	1.60868e-05		0.215299	2.06194e-05		0.215299	5.04031e-05		0.215299	8.3982e-05		0.215299	0.000125015		0.215299	0.000184846
0.218193	1.63777e-05		0.218193	2.08741e-05		0.218193	5.20311e-05		0.218193	8.36502e-05		0.218193	0.000124557		0.218193	0.00018472
0.221087	1.6695e-05		0.221087	2.114e-05		0.221087	5.37003e-05		0.221087	8.33223e-05		0.221087	0.000124092		0.221087	0.000184553
0.223981	1.70381e-05		0.223981	2.14184e-05		0.223981	5.52455e-05		0.223981	8.30037e-05		0.223981	0.000123618		0.223981	0.000184321
0.226875	1.7408e-05		0.226875	2.1707e-05		0.226875	5.65846e-05		0.226875	8.26957e-05		0.226875	0.000123133		0.226875	0.000184015
0.229768	1.78098e-05		0.229768	2.20099e-05		0.229768	5.76999e-05		0.229768	8.23978e-05		0.229768	0.000122637		0.229768	0.000183634
0.232662	1.82371e-05		0.232662	2.23348e-05		0.232662	5.86021e-05		0.232662	8.21086e-05		0.232662	0.000122129		0.232662	0.000183184
0.235556	1.86883e-05		0.235556	2.26814e-05		0.235556	5.93124e-05		0.235556	8.18271e-05		0.235556	0.000121611		0.235556	0.000182671
0.23845	1.91694e-05		0.23845	2.30491e-05		0.23845	5.98541e-05		0.23845	8.15524e-05		0.23845	0.000121088		0.23845	0.000182102
0.241344	1.96724e-05		0.241344	2.34412e-05		0.241344	6.02581e-05		0.241344	8.12837e-05		0.241344	0.000120567		0.241344	0.000181483
0.244238	2.01988e-05		0.244238	2.38572e-05		0.244238	6.0554e-05		0.244238	8.10206e-05		0.244238	0.000120048		0.244238	0.000180827
0.247132	2.07472e-05		0.247132	2.43014e-05		0.247132	6.07596e-05		0.247132	8.07626e-05		0.247132	0.000119531		0.247132	0.000180142
0.250026	2.13124e-05		0.250026	2.47794e-05		0.250026	6.08889e-05		0.250026	8.05094e-05		0.250026	0.000119016		0.250026	0.000179431
0.25292	2.18993e-05		0.25292	2.5294e-05		0.25292	6.09545e-05		0.25292	8.02609e-05		0.25292	0.000118502		0.25292	0.000178697
0.255814	2.25047e-05		0.255814	2.58466e-05		0.255814	6.09669e-05		0.255814	8.00169e-05		0.255814	0.000117989		0.255814	0.000177942
0.258707	2.31271e-05		0.258707	2.64415e-05		0.258707	6.09349e-05		0.258707	7.97773e-05		0.258707	0.000117476		0.258707	0.000177169
0.261601	2.37708e-05		0.261601	2.70844e-05		0.261601	6.08662e-05		0.261601	7.95419e-05		0.261601	0.000116962		0.261601	0.00017638
0.264495	2.44377e-05		0.264495	2.77821e-05		0.264495	6.07673e-05		0.264495	7.93108e-05		0.264495	0.000116453		0.264495	0.000175577
0.267389	2.51245e-05		0.267389	2.85421e-05		0.267389	6.06441e-05		0.267389	7.90837e-05		0.267389	0.000115957		0.267389	0.00017476
0.270283	2.58313e-05		0.270283	2.93733e-05		0.270283	6.05013e-05		0.270283	7.88608e-05		0.270283	0.000115475		0.270283	0.000173932
0.273177	2.65585e-05		0.273177	3.02854e-05		0.273177	6.03427e-05		0.273177	7.86418e-05		0.273177	0.000115007		0.273177	0.000173093
0.276071	2.73043e-05		0.276071	3.12879e-05		0.276071	6.01717e-05		0.276071	7.84268e-05		0.276071	0.000114554		0.276071	0.000172245
0.278965	2.80702e-05		0.278965	3.23892e-05		0.278965	5.99911e-05		0.278965	7.82157e-05		0.278965	0.000114116		0.278965	0.000171388
0.281859	2.88588e-05		0.281859	3.35971e-05		0.281859	5.98029e-05		0.281859	7.80083e-05		0.281859	0.000113694		0.281859	0.000170522
0.284752	2.96733e-05		0.284752	3.49191e-05		0.284752	5.96091e-05		0.284752	7.78045e-05		0.284752	0.000113289		0.284752	0.000169648
0.287646	3.05167e-05		0.287646	3.63657e-05		0.287646	5.94111e-05		0.287646	7.76043e-05		0.287646	0.000112905		0.287646	0.000168771
0.29054	3.13924e-05		0.29054	3.7946e-05		0.29054	5.92102e-05		0.29054	7.74069e-05		0.29054	0.000112541		0.29054	0.000167899
0.293434	3.23041e-05		0.293434	3.96643e-05		0.293434	5.90072e-05		0.293434	7.72142e-05		0.293434	0.000112197		0.293434	0.000167031
0.296328	3.32559e-05		0.296328	4.15204e-05		0.296328	5.8803e-05		0.296328	7.70268e-05		0.296328	0.000111852		0.296328	0.000166167
0.299222	3.42525e-05		0.299222	4.35146e-05		0.299222	5.85981e-05		0.299222	7.68424e-05		0.299222	0.000111491		0.299222	0.000165309
0.302116	3.52991e-05		0.302116	4.56545e-05		0.302116	5.8393e-05		0.302116	7.66603e-05		0.302116	0.000111113		0.302116	0.000164456
0.30501	3.6402e-05		0.30501	4.79502e-05		0.30501	5.81879e-05		0.30501	7.64802e-05		0.30501	0.000110718		0.30501	0.000163609
0.307904	3.75685e-05		0.307904	5.04121e-05		0.307904	5.79831e-05		0.307904	7.6302e-05		0.307904	0.000110306		0.307904	0.000162768
0.310797	3.88066e-05		0.310797	5.30504e-05		0.310797	5.77786e-05		0.310797	7.61255e-05		0.310797	0.000109875		0.310797	0.000161934
0.313691	4.01292e-05		0.313691	5.58734e-05		0.313691	5.75744e-05		0.313691	7.59511e-05		0.313691	0.000109427		0.313691	0.000161105
0.313691	4.01292e-05		0.313691	5.58734e-05		0.313691	5.75744e-05		0.313691	7.59511e-05		0.313691	0.000109427		0.313691	0.000161105
0.316585	4.15506e-05		0.316585	5.8892e-05		0.316585	5.73684e-05		0.316585	7.57614e-05		0.316585	0.000108958		0.316585	0.000160273
0.319479	4.30829e-05		0.319479	6.21105e-05		0.319479	5.7159e-05		0.319479	7.55416e-05		0.319479	0.000108472		0.319479	0.000159428
0.322373	4.47356e-05		0.322373	6.55315e-05		0.322373	5.69469e-05		0.322373	7.52967e-05		0.322373	0.000107974		0.322373	0.000158571
0.325267	4.65224e-05		0.325267	6.91572e-05		0.325267	5.67322e-05		0.325267	7.50299e-05		0.325267	0.000107465		0.325267	0.000157706
0.328161	4.84628e-05		0.328161	7.29925e-05		0.328161	5.65159e-05		0.328161	7.47438e-05		0.328161	0.000106944		0.328161	0.000156835
0.331055	5.05737e-05		0.331055	7.70386e-05		0.331055	5.62996e-05		0.331055	7.44405e-05		0.331055	0.000106412		0.331055	0.000155959
0.333949	5.28719e-05		0.333949	8.12955e-05		0.333949	5.60843e-05		0.333949	7.41213e-05		0.333949	0.00010587		0.333949	0.000155081
0.336842	5.53724e-05		0.336842	8.57699e-05		0.336842	5.587e-05		0.336842	7.37873e-05		0.336842	0.000105317		0.336842	0.000154199
0.339736	5.80963e-05		0.339736	9.04621e-05		0.339736	5.56567e-05		0.339736	7.34391e-05		0.339736	0.000104755		0.339736	0.000153316
0.34263	6.10656e-05		0.34263	9.53761e-05		0.34263	5.54446e-05		0.34263	7.30768e-05		0.34263	0.000104183		0.34263	0.00015243
0.345524	6.43035e-05		0.345524	0.000100519		0.345524	5.52336e-05		0.345524	7.27e-05		0.345524	0.000103607		0.345524	0.000151542
0.348418	6.78326e-05		0.348418	0.000105909		0.348418	5.50239e-05		0.348418	7.23078e-05		0.348418	0.000103031		0.348418	0.000150653
0.351312	7.16703e-05		0.351312	0.000111567		0.351312	5.48156e-05		0.351312	7.18981e-05		0.351312	0.000102455		0.351312	0.000149762
0.354206	7.58401e-05		0.354206	0.000117494		0.354206	5.46087e-05		0.354206	7.1467e-05		0.354206	0.000101881		0.354206	0.000148868
0.3571	8.03622e-05		0.3571	0.0001237		0.3571	5.44035e-05		0.3571	7.10314e-05		0.3571	0.000101308		0.3571	0.000147973
0.359994	8.52518e-05		0.359994	0.00013022		0.359994	5.41999e-05		0.359994	7.06101e-05		0.359994	0.000100736		0.359994	0.000147075
0.362887	9.05317e-05		0.362887	0.000137108		0.362887	5.39981e-05		0.362887	7.02026e-05		0.362887	0.000100166		0.362887	0.000146176
0.365781	9.62213e-05		0.365781	0.000144429		0.365781	5.37984e-05		0.365781	6.98093e-05		0.365781	9.95989e-05		0.365781	0.000145278
0.368675	0.000102332		0.368675	0.000152228		0.368675	5.36007e-05		0.368675	6.94307e-05		0.368675	9.90414e-05		0.368675	0.00014438
0.371569	0.000108873		0.371569	0.000160537		0.371569	5.34053e-05		0.371569	6.90673e-05		0.371569	9.8499e-05		0.371569	0.000143483
0.374463	0.000115855		0.374463	0.000169389		0.374463	5.32123e-05		0.374463	6.87194e-05		0.374463	9.79719e-05		0.374463	0.000142588
0.377357	0.000123284		0.377357	0.000178815		0.377357	5.30218e-05		0.377357	6.83877e-05		0.377357	9.74612e-05		0.377357	0.000141693
0.380251	0.000131176		0.380251	0.000188854		0.380251	5.28339e-05		0.380251	6.80725e-05		0.380251	9.69676e-05		0.380251	0.000140799
0.383145	0.000139545		0.383145	0.00019955		0.383145	5.26486e-05		0.383145	6.77742e-05		0.383145	9.64916e-05		0.383145	0.000139905
0.386039	0.000148401		0.386039	0.000210942		0.386039	5.24661e-05		0.386039	6.74932e-05		0.386039	9.60336e-05		0.386039	0.000139012
0.388932	0.000157768		0.388932	0.000223039		0.388932	5.22862e-05		0.388932	6.723e-05		0.388932	9.55944e-05		0.388932	0.000138119
0.391826	0.000167685		0.391826	0.000235854		0.391826	5.21091e-05		0.391826	6.69851e-05		0.391826	9.51826e-05		0.391826	0.000137224
0.39472	0.000178212		0.39472	0.000249455		0.39472	5.19347e-05		0.39472	6.67591e-05		0.39472	9.48069e-05		0.39472	0.000136328
0.397614	0.000189434		0.397614	0.000263978		0.397614	5.17633e-05		0.397614	6.65533e-05		0.397614	9.44699e-05		0.397614	0.00013543
0.400508	0.000201456		0.400508	0.000279623		0.400508	5.15954e-05		0.400508	6.63695e-05		0.400508	9.41744e-05		0.400508	0.000134536
0.403402	0.000214385		0.403402	0.000296607		0.403402	5.14349e-05		0.403402	6.62113e-05		0.403402	9.39236e-05		0.403402	0.000133644
0.403402	0.000214385		0.403402	0.000296607		0.403402	5.14349e-05		0.403402	6.62113e-05		0.403402	9.39236e-05		0.403402	0.000133644
0.406296	0.000228311		0.406296	0.0003151		0.406296	5.12781e-05		0.406296	6.60565e-05		0.406296	9.36837e-05		0.406296	0.000132759
0.40919	0.000243283		0.40919	0.000335192		0.40919	5.11179e-05		0.40919	6.58824e-05		0.40919	9.34194e-05		0.40919	0.000131882
0.412084	0.000259305		0.412084	0.000356916		0.412084	5.09543e-05		0.412084	6.5691e-05		0.412084	9.31343e-05		0.412084	0.000131014
0.414977	0.000276342		0.414977	0.000380362		0.414977	5.07875e-05		0.414977	6.54822e-05		0.414977	9.28314e-05		0.414977	0.000130153
0.417871	0.00029438		0.417871	0.000405709		0.417871	5.06173e-05		0.417871	6.52601e-05		0.417871	9.25097e-05		0.417871	0.000129301
0.420765	0.000313439		0.420765	0.000433369		0.420765	5.04442e-05		0.420765	6.5029e-05		0.420765	9.21692e-05		0.420765	0.000128456
0.423659	0.000333608		0.423659	0.000463691		0.423659	5.02682e-05		0.423659	6.47888e-05		0.423659	9.18102e-05		0.423659	0.00012762
0.426553	0.000355203		0.426553	0.000497534		0.426553	5.00896e-05		0.426553	6.45399e-05		0.426553	9.14335e-05		0.426553	0.000126793
0.429447	0.000378716		0.429447	0.000536421		0.429447	4.99089e-05		0.429447	6.42831e-05		0.429447	9.104e-05		0.429447	0.000125977
0.432341	0.000404551		0.432341	0.000581922		0.432341	4.97264e-05		0.432341	6.40189e-05		0.432341	9.06309e-05		0.432341	0.000125167
0.435235	0.00043291		0.435235	0.000637023		0.435235	4.95423e-05		0.435235	6.37481e-05		0.435235	9.02087e-05		0.435235	0.000124359
0.438129	0.000464134		0.438129	0.000706569		0.438129	4.93569e-05		0.438129	6.34713e-05		0.438129	8.9776e-05		0.438129	0.000123552
0.441023	0.000498732		0.441023	0.000792847		0.441023	4.91705e-05		0.441023	6.31892e-05		0.441023	8.9334e-05		0.441023	0.000122747
0.443916	0.000537955		0.443916	0.000885305		0.443916	4.89834e-05		0.443916	6.29023e-05		0.443916	8.88838e-05		0.443916	0.000121945
0.44681	0.000584024		0.44681	0.000975103		0.44681	4.87956e-05		0.44681	6.26111e-05		0.44681	8.84264e-05		0.44681	0.000121146
0.449704	0.00063963		0.449704	0.00105933		0.449704	4.86073e-05		0.449704	6.23159e-05		0.449704	8.79624e-05		0.449704	0.000120351
0.452598	0.000708726		0.452598	0.00113367		0.452598	4.84188e-05		0.452598	6.20171e-05		0.452598	8.74925e-05		0.452598	0.000119562
0.455492	0.000790753		0.455492	0.00119768		0.455492	4.82302e-05		0.455492	6.17147e-05		0.455492	8.7018e-05		0.455492	0.00011878
0.458386	0.000877706		0.458386	0.00125055		0.458386	4.80417e-05		0.458386	6.14091e-05		0.458386	8.65398e-05		0.458386	0.000118006
0.46128	0.000960803		0.46128	0.00129141		0.46128	4.78533e-05		0.46128	6.11003e-05		0.46128	8.60585e-05		0.46128	0.000117243
0.464174	0.00103615		0.464174	0.00132067		0.464174	4.76653e-05		0.464174	6.07882e-05		0.464174	8.55745e-05		0.464174	0.000116493
0.467068	0.00110097		0.467068	0.00134018		0.467068	4.74778e-05		0.467068	6.04729e-05		0.467068	8.50883e-05		0.467068	0.000115748
0.469961	0.00115315		0.469961	0.00135075		0.469961	4.72908e-05		0.469961	6.01543e-05		0.469961	8.46003e-05		0.469961	0.000115
0.472855	0.0011937		0.472855	0.00135243		0.472855	4.71046e-05		0.472855	5.98348e-05		0.472855	8.41106e-05		0.472855	0.000114248
0.475749	0.00122297		0.475749	0.00134722		0.475749	4.69191e-05		0.475749	5.95169e-05		0.475749	8.36196e-05		0.475749	0.000113494
0.478643	0.00124149		0.478643	0.00133679		0.478643	4.67342e-05		0.478643	5.92009e-05		0.478643	8.31283e-05		0.478643	0.000112737
0.481537	0.0012499		0.481537	0.00132052		0.481537	4.65498e-05		0.481537	5.88871e-05		0.481537	8.26376e-05		0.481537	0.000111978
0.484431	0.00124964		0.484431	0.0012986		0.484431	4.63658e-05		0.484431	5.85757e-05		0.484431	8.21477e-05		0.484431	0.000111218
0.487325	0.00124262		0.487325	0.00127258		0.487325	4.61822e-05		0.487325	5.82669e-05		0.487325	8.16588e-05		0.487325	0.000110456
0.490219	0.00123018		0.490219	0.00124304		0.490219	4.5999e-05		0.490219	5.79612e-05		0.490219	8.1171e-05		0.490219	0.000109693
0.493113	0.00121225		0.493113	0.00121048		0.493113	4.58162e-05		0.493113	5.76585e-05		0.493113	8.06842e-05		0.493113	0.00010893
0.496006	0.00118827		0.496006	0.00117576		0.496006	4.56339e-05		0.496006	5.73593e-05		0.496006	8.01984e-05		0.496006	0.000108167
0.4989	0.0011599		0.4989	0.00113948		0.4989	4.54521e-05		0.4989	5.70637e-05		0.4989	7.97152e-05		0.4989	0.000107403
0.501794	0.00112896		0.501794	0.00110244		0.501794	4.52708e-05		0.501794	5.67721e-05		0.501794	7.92365e-05		0.501794	0.000106643
0.504688	0.00109619		0.504688	0.00106462		0.504688	4.509e-05		0.504688	5.64847e-05		0.504688	7.87623e-05		0.504688	0.000105887
0.507582	0.00106219		0.507582	0.00102616		0.507582	4.49097e-05		0.507582	5.62018e-05		0.507582	7.82928e-05		0.507582	0.000105137
0.510476	0.00102678		0.510476	0.000987466		0.510476	4.47298e-05		0.510476	5.59238e-05		0.510476	7.78281e-05		0.510476	0.000104393
0.51337	0.000990191		0.51337	0.000948849		0.51337	4.45504e-05		0.51337	5.56512e-05		0.51337	7.73685e-05		0.51337	0.000103657
0.516264	0.000952757		0.516264	0.000910635		0.516264	4.43712e-05		0.516264	5.53847e-05		0.516264	7.69142e-05		0.516264	0.000102928
0.519158	0.00091479		0.519158	0.000872973		0.519158	4.41923e-05		0.519158	5.51251e-05		0.519158	7.64665e-05		0.519158	0.000102207
0.522051	0.000876823		0.522051	0.000836069		0.522051	4.40136e-05		0.522051	5.48735e-05		0.522051	7.60279e-05		0.522051	0.000101495
0.524945	0.000839058		0.524945	0.000799992		0.524945	4.3835e-05		0.524945	5.46314e-05		0.524945	7.56011e-05		0.524945	0.000100793
0.524945	0.000839058		0.524945	0.000799992		0.524945	4.3835e-05		0.524945	5.46314e-05		0.524945	7.56011e-05		0.524945	0.000100793
0.527839	0.00080187		0.527839	0.000764945		0.527839	4.36566e-05		0.527839	5.4395e-05		0.527839	7.51823e-05		0.527839	0.000100101
0.530733	0.000765438		0.530733	0.000730998		0.530733	4.34785e-05		0.530733	5.41596e-05		0.530733	7.4767e-05		0.530733	9.94189e-05
0.533627	0.000730029		0.533627	0.000698208		0.533627	4.33009e-05		0.533627	5.39251e-05		0.533627	7.43547e-05		0.533627	9.87471e-05
0.536521	0.00069583		0.536521	0.000666577		0.536521	4.31238e-05		0.536521	5.36911e-05		0.536521	7.3945e-05		0.536521	9.80862e-05
0.539415	0.000662878		0.539415	0.000636245		0.539415	4.29473e-05		0.539415	5.34574e-05		0.539415	7.35373e-05		0.539415	9.74325e-05
0.542309	0.000631105		0.542309	0.000607293		0.542309	4.27712e-05		0.542309	5.32237e-05		0.542309	7.31316e-05		0.542309	9.67825e-05
0.545203	0.000600499		0.545203	0.00057954		0.545203	4.25955e-05		0.545203	5.29897e-05		0.545203	7.27277e-05		0.545203	9.61363e-05
0.548096	0.00057115		0.548096	0.000552939		0.548096	4.24204e-05		0.548096	5.27552e-05		0.548096	7.23252e-05		0.548096	9.54939e-05
0.55099	0.000542985		0.55099	0.000527502		0.55099	4.22459e-05		0.55099	5.25199e-05		0.55099	7.19238e-05		0.55099	9.48554e-05
0.553884	0.000515972		0.553884	0.000503268		0.553884	4.20721e-05		0.553884	5.22839e-05		0.553884	7.15229e-05		0.553884	9.42209e-05
0.556778	0.000490258		0.556778	0.000480254		0.556778	4.18988e-05		0.556778	5.20469e-05		0.556778	7.11224e-05		0.556778	9.35906e-05
0.559672	0.00046576		0.559672	0.000458282		0.559672	4.17261e-05		0.559672	5.18089e-05		0.559672	7.07217e-05		0.559672	9.29647e-05
0.562566	0.000442434		0.562566	0.000437209		0.562566	4.15539e-05		0.562566	5.15699e-05		0.562566	7.03212e-05		0.562566	9.23434e-05
0.56546	0.000420328		0.56546	0.000417089		0.56546	4.13821e-05		0.56546	5.13297e-05		0.56546	6.99217e-05		0.56546	9.17269e-05
0.568354	0.000399298		0.568354	0.000397997		0.568354	4.12108e-05		0.568354	5.10884e-05		0.568354	6.95231e-05		0.568354	9.11157e-05
0.571248	0.000379178		0.571248	0.000379862		0.571248	4.104e-05		0.571248	5.08457e-05		0.571248	6.91253e-05		0.571248	9.05103e-05
0.574142	0.000360044		0.574142	0.000362547		0.574142	4.08695e-05		0.574142	5.06018e-05		0.574142	6.8728e-05		0.574142	8.99089e-05
0.577035	0.000342107		0.577035	0.000346043		0.577035	4.06993e-05		0.577035	5.03564e-05		0.577035	6.83311e-05		0.577035	8.93098e-05
0.579929	0.000325265		0.579929	0.000330403		0.579929	4.05296e-05		0.579929	5.01103e-05		0.579929	6.79344e-05		0.579929	8.87131e-05
0.582823	0.000309226		0.582823	0.000315732		0.582823	4.03601e-05		0.582823	4.98645e-05		0.582823	6.75377e-05		0.582823	8.81188e-05
0.585717	0.000293909		0.585717	0.000301868		0.585717	4.01911e-05		0.585717	4.9619e-05		0.585717	6.71418e-05		0.585717	8.7527e-05
0.588611	0.000279423		0.588611	0.000288574		0.588611	4.00223e-05		0.588611	4.93739e-05		0.588611	6.67477e-05		0.588611	8.69379e-05
0.591505	0.000265889		0.591505	0.000275896		0.591505	3.98539e-05		0.591505	4.91295e-05		0.591505	6.63553e-05		0.591505	8.63515e-05
0.594399	0.000253054		0.594399	0.000263899		0.594399	3.96858e-05		0.594399	4.88856e-05		0.594399	6.59646e-05		0.594399	8.57678e-05
0.597293	0.00024063		0.597293	0.000252608		0.597293	3.95181e-05		0.597293	4.86425e-05		0.597293	6.55757e-05		0.597293	8.5187e-05
0.600186	0.000228688		0.600186	0.000241965		0.600186	3.93506e-05		0.600186	4.84e-05		0.600186	6.51884e-05		0.600186	8.46089e-05
0.60308	0.000217299		0.60308	0.0002317		0.60308	3.91835e-05		0.60308	4.81583e-05		0.60308	6.48027e-05		0.60308	8.40336e-05
0.605974	0.00020664		0.605974	0.000221664		0.605974	3.90167e-05		0.605974	4.79172e-05		0.605974	6.44184e-05		0.605974	8.3461e-05
0.608868	0.000196867		0.608868	0.000211998		0.608868	3.88502e-05		0.608868	4.76768e-05		0.608868	6.40367e-05		0.608868	8.28911e-05
0.611762	0.000187588		0.611762	0.000202764		0.611762	3.8684e-05		0.611762	4.74369e-05		0.611762	6.36586e-05		0.611762	8.23237e-05
0.614656	0.000178564		0.614656	0.000193972		0.614656	3.85187e-05		0.614656	4.71976e-05		0.614656	6.32846e-05		0.614656	8.17617e-05
0.61755	0.000169989		0.61755	0.000185642		0.61755	3.83544e-05		0.61755	4.69586e-05		0.61755	6.29145e-05		0.61755	8.12081e-05
0.620444	0.000161972		0.620444	0.000177932		0.620444	3.81911e-05		0.620444	4.67198e-05		0.620444	6.25484e-05		0.620444	8.06634e-05
0.623338	0.000154634		0.623338	0.000170657		0.623338	3.80289e-05		0.623338	4.64811e-05		0.623338	6.21864e-05		0.623338	8.01278e-05
0.626231	0.000147977		0.626231	0.000163537		0.626231	3.78679e-05		0.626231	4.62425e-05		0.626231	6.18284e-05		0.626231	7.96013e-05
0.629125	0.000141999		0.629125	0.000156621		0.629125	3.77083e-05		0.629125	4.60042e-05		0.629125	6.14745e-05		0.629125	7.90843e-05
0.632019	0.000136605		0.632019	0.000150008		0.632019	3.755e-05		0.632019	4.57663e-05		0.632019	6.1126e-05		0.632019	7.85771e-05
0.634913	0.000131475		0.634913	0.000143829		0.634913	3.73933e-05		0.634913	4.55305e-05		0.634913	6.07846e-05		0.634913	7.80803e-05
0.637807	0.000126482		0.637807	0.000138143		0.637807	3.72383e-05		0.637807	4.52987e-05		0.637807	6.04511e-05		0.637807	7.75948e-05
0.640701	0.000121732		0.640701	0.000133085		0.640701	3.70853e-05		0.640701	4.50724e-05		0.640701	6.01269e-05		0.640701	7.71219e-05
0.643595	0.000117353		0.643595	0.000128866		0.643595	3.69345e-05		0.643595	4.48531e-05		0.643595	5.98144e-05		0.643595	7.66642e-05
0.643595	0.000117353		0.643595	0.000128866		0.643595	3.69345e-05		0.643595	4.48531e-05		0.643595	5.98144e-05		0.643595	7.66642e-05
0.646489	0.000113348		0.646489	0.00012529		0.646489	3.67857e-05		0.646489	4.46399e-05		0.646489	5.95104e-05		0.646489	7.62192e-05
0.649383	0.000109594		0.649383	0.000121988		0.649383	3.6638e-05		0.649383	4.44309e-05		0.649383	5.92101e-05		0.649383	7.57827e-05
0.652277	0.000106006		0.652277	0.000118869		0.652277	3.64912e-05		0.652277	4.42258e-05		0.652277	5.89127e-05		0.652277	7.53549e-05
0.65517	0.000102528		0.65517	0.00011588		0.65517	3.6345e-05		0.65517	4.40237e-05		0.65517	5.86177e-05		0.65517	7.49335e-05
0.658064	9.91722e-05		0.658064	0.000112991		0.658064	3.61993e-05		0.658064	4.38238e-05		0.658064	5.83244e-05		0.658064	7.45161e-05
0.660958	9.59501e-05		0.660958	0.000110183		0.660958	3.6054e-05		0.660958	4.36256e-05		0.660958	5.80322e-05		0.660958	7.41021e-05
0.663852	9.28473e-05		0.663852	0.000107451		0.663852	3.59089e-05		0.663852	4.34284e-05		0.663852	5.77407e-05		0.663852	7.36908e-05
0.666746	8.98607e-05		0.666746	0.000104792		0.666746	3.57638e-05		0.666746	4.32317e-05		0.666746	5.74495e-05		0.666746	7.3282e-05
0.66964	8.70006e-05		0.66964	0.000102196		0.66964	3.56189e-05		0.66964	4.30353e-05		0.66964	5.71585e-05		0.66964	7.28754e-05
0.672534	8.42598e-05		0.672534	9.96722e-05		0.672534	3.54738e-05		0.672534	4.28389e-05		0.672534	5.68675e-05		0.672534	7.24707e-05
0.675428	8.16449e-05		0.675428	9.72324e-05		0.675428	3.53287e-05		0.675428	4.26425e-05		0.675428	5.65764e-05		0.675428	7.2068e-05
0.678322	7.91658e-05		0.678322	9.48698e-05		0.678322	3.51833e-05		0.678322	4.24458e-05		0.678322	5.6285e-05		0.678322	7.16669e-05
0.681215	7.68201e-05		0.681215	9.26066e-05		0.681215	3.50375e-05		0.681215	4.22487e-05		0.681215	5.59936e-05		0.681215	7.12676e-05
0.684109	7.46072e-05		0.684109	9.04574e-05		0.684109	3.48917e-05		0.684109	4.20513e-05		0.684109	5.57027e-05		0.684109	7.08698e-05
0.687003	7.25057e-05		0.687003	8.83866e-05		0.687003	3.47464e-05		0.687003	4.18534e-05		0.687003	5.54122e-05		0.687003	7.04733e-05
0.689897	7.04941e-05		0.689897	8.6372e-05		0.689897	3.46018e-05		0.689897	4.16548e-05		0.689897	5.51222e-05		0.689897	7.00779e-05
0.692791	6.85753e-05		0.692791	8.442e-05		0.692791	3.4458e-05		0.692791	4.14558e-05		0.692791	5.48325e-05		0.692791	6.96833e-05
0.695685	6.67543e-05		0.695685	8.25367e-05		0.695685	3.43148e-05		0.695685	4.12566e-05		0.695685	5.4543e-05		0.695685	6.92889e-05
0.698579	6.50256e-05		0.698579	8.07099e-05		0.698579	3.41724e-05		0.698579	4.10576e-05		0.698579	5.42538e-05		0.698579	6.88925e-05
0.701473	6.3385e-05		0.701473	7.89269e-05		0.701473	3.40306e-05		0.701473	4.08587e-05		0.701473	5.39647e-05		0.701473	6.84915e-05
0.704367	6.18404e-05		0.704367	7.71923e-05		0.704367	3.38893e-05		0.704367	4.06599e-05		0.704367	5.36758e-05		0.704367	6.80836e-05
0.70726	6.04001e-05		0.70726	7.55167e-05		0.70726	3.37487e-05		0.70726	4.04612e-05		0.70726	5.33875e-05		0.70726	6.76659e-05
0.710154	5.90689e-05		0.710154	7.3911e-05		0.710154	3.36085e-05		0.710154	4.02625e-05		0.710154	5.31006e-05		0.710154	6.72339e-05
0.713048	5.78241e-05		0.713048	7.23865e-05		0.713048	3.34688e-05		0.713048	4.00639e-05		0.713048	5.28154e-05		0.713048	6.67812e-05
0.715942	5.66547e-05		0.715942	7.09594e-05		0.715942	3.33294e-05		0.715942	3.98653e-05		0.715942	5.2532e-05		0.715942	6.62984e-05
0.715942	5.66547e-05		0.715942	7.09594e-05		0.715942	3.33294e-05		0.715942	3.98653e-05		0.715942	5.2532e-05		0.715942	6.62984e-05
0.718836	5.55473e-05		0.718836	6.96053e-05		0.718836	3.31904e-05		0.718836	3.96665e-05		0.718836	5.22498e-05		0.718836	6.57992e-05
0.72173	5.44764e-05		0.72173	6.82899e-05		0.72173	3.30518e-05		0.72173	3.94675e-05		0.72173	5.19679e-05		0.72173	6.53028e-05
0.724624	5.34436e-05		0.724624	6.70116e-05		0.724624	3.29136e-05		0.724624	3.9268e-05		0.724624	5.1686e-05		0.724624	6.48098e-05
0.727518	5.24479e-05		0.727518	6.57675e-05		0.727518	3.27756e-05		0.727518	3.90681e-05		0.727518	5.1404e-05		0.727518	6.43206e-05
0.730412	5.14864e-05		0.730412	6.45541e-05		0.730412	3.26379e-05		0.730412	3.88674e-05		0.730412	5.1122e-05		0.730412	6.38362e-05
0.733305	5.05566e-05		0.733305	6.3368e-05		0.733305	3.25003e-05		0.733305	3.86661e-05		0.733305	5.0839e-05		0.733305	6.33578e-05
0.736199	4.96559e-05		0.736199	6.22093e-05		0.736199	3.23628e-05		0.736199	3.84638e-05		0.736199	5.05542e-05		0.736199	6.28868e-05
0.739093	4.87815e-05		0.739093	6.10784e-05		0.739093	3.22252e-05		0.739093	3.82604e-05		0.739093	5.02672e-05		0.739093	6.24248e-05
0.741987	4.79312e-05		0.741987	5.99721e-05		0.741987	3.20874e-05		0.741987	3.80557e-05		0.741987	4.99775e-05		0.741987	6.1967e-05
0.744881	4.71029e-05		0.744881	5.88875e-05		0.744881	3.19493e-05		0.744881	3.78495e-05		0.744881	4.96846e-05		0.744881	6.15061e-05
0.747775	4.62949e-05		0.747775	5.78219e-05		0.747775	3.18107e-05		0.747775	3.76416e-05		0.747775	4.9388e-05		0.747775	6.10401e-05
0.750669	4.5505e-05		0.750669	5.67725e-05		0.750669	3.16715e-05		0.750669	3.74317e-05		0.750669	4.9087e-05		0.750669	6.05688e-05
0.753563	4.47311e-05		0.753563	5.57399e-05		0.753563	3.15313e-05		0.753563	3.72192e-05		0.753563	4.87808e-05		0.753563	6.00923e-05
0.756457	4.39712e-05		0.756457	5.47249e-05		0.756457	3.13894e-05		0.756457	3.70027e-05		0.756457	4.84685e-05		0.756457	5.96105e-05
0.75935	4.32235e-05		0.75935	5.37248e-05		0.75935	3.12447e-05		0.75935	3.67806e-05		0.75935	4.81484e-05		0.75935	5.91232e-05
0.762244	4.24864e-05		0.762244	5.27369e-05		0.762244	3.10964e-05		0.762244	3.65523e-05		0.762244	4.78193e-05		0.762244	5.86304e-05
0.765138	4.17586e-05		0.765138	5.17581e-05		0.765138	3.09438e-05		0.765138	3.63173e-05		0.765138	4.74802e-05		0.765138	5.8132e-05
0.768032	4.10392e-05		0.768032	5.07838e-05		0.768032	3.07863e-05		0.768032	3.60749e-05		0.768032	4.71301e-05		0.768032	5.76282e-05
0.770926	4.03271e-05		0.770926	4.98167e-05		0.770926	3.06234e-05		0.770926	3.58247e-05		0.770926	4.6768e-05		0.770926	5.71192e-05
0.77382	3.96217e-05		0.77382	4.88633e-05		0.77382	3.04544e-05		0.77382	3.55662e-05		0.77382	4.63931e-05		0.77382	5.66054e-05
0.776714	3.8923e-05		0.776714	4.79243e-05		0.776714	3.02786e-05		0.776714	3.5299e-05		0.776714	4.60046e-05		0.776714	5.60872e-05
0.779608	3.82317e-05		0.779608	4.70003e-05		0.779608	3.00955e-05		0.779608	3.5023e-05		0.779608	4.56013e-05		0.779608	5.5559e-05
0.782502	3.75497e-05		0.782502	4.60922e-05		0.782502	2.99047e-05		0.782502	3.47381e-05		0.782502	4.51822e-05		0.782502	5.5013e-05
0.785396	3.68796e-05		0.785396	4.52018e-05		0.785396	2.97056e-05		0.785396	3.44445e-05		0.785396	4.47468e-05		0.785396	5.4448e-05
0.788289	3.62241e-05		0.788289	4.43402e-05		0.788289	2.94981e-05		0.788289	3.41424e-05		0.788289	4.42946e-05		0.788289	5.3866e-05
0.791183	3.55862e-05		0.791183	4.35205e-05		0.791183	2.92819e-05		0.791183	3.38322e-05		0.791183	4.38253e-05		0.791183	5.32693e-05
0.794077	3.4969e-05		0.794077	4.27481e-05		0.794077	2.90566e-05		0.794077	3.35143e-05		0.794077	4.33383e-05		0.794077	5.26603e-05
0.796971	3.43756e-05		0.796971	4.20267e-05		0.796971	2.88219e-05		0.796971	3.3189e-05		0.796971	4.28332e-05		0.796971	5.20408e-05
0.799865	3.38074e-05		0.799865	4.13576e-05		0.799865	2.85775e-05		0.799865	3.28567e-05		0.799865	4.23089e-05		0.799865	5.14119e-05
0.799865	3.38074e-05		0.799865	4.13576e-05		0.799865	2.85775e-05		0.799865	3.28567e-05		0.799865	4.23089e-05		0.799865	5.14119e-05
0.802759	3.32522e-05		0.802759	4.07086e-05		0.802759	2.83215e-05		0.802759	3.25159e-05		0.802759	4.17682e-05		0.802759	5.07652e-05
0.805653	3.26981e-05		0.805653	4.00508e-05		0.805653	2.80521e-05		0.805653	3.2165e-05		0.805653	4.12142e-05		0.805653	5.00913e-05
0.808547	3.21467e-05		0.808547	3.93886e-05		0.808547	2.77681e-05		0.808547	3.18042e-05		0.808547	4.06474e-05		0.808547	4.93913e-05
0.811441	3.1599e-05		0.811441	3.87237e-05		0.811441	2.74717e-05		0.811441	3.14336e-05		0.811441	4.00691e-05		0.811441	4.86665e-05
0.814334	3.10551e-05		0.814334	3.8056e-05		0.814334	2.71653e-05		0.814334	3.10532e-05		0.814334	3.94812e-05		0.814334	4.79167e-05
0.817228	3.05144e-05		0.817228	3.73841e-05		0.817228	2.68488e-05		0.817228	3.06631e-05		0.817228	3.88856e-05		0.817228	4.71419e-05
0.820122	2.99764e-05		0.820122	3.67101e-05		0.820122	2.6522e-05		0.820122	3.02636e-05		0.820122	3.82826e-05		0.820122	4.63415e-05
0.823016	2.94415e-05		0.823016	3.60366e-05		0.823016	2.61848e-05		0.823016	2.9855e-05		0.823016	3.76712e-05		0.823016	4.55152e-05
0.82591	2.89101e-05		0.82591	3.53623e-05		0.82591	2.58373e-05		0.82591	2.9438e-05		0.82591	3.70512e-05		0.82591	4.46647e-05
0.828804	2.83807e-05		0.828804	3.46856e-05		0.828804	2.54799e-05		0.828804	2.90117e-05		0.828804	3.64247e-05		0.828804	4.37925e-05
0.831698	2.78521e-05		0.831698	3.40056e-05		0.831698	2.51134e-05		0.831698	2.85746e-05		0.831698	3.57915e-05		0.831698	4.28991e-05
0.834592	2.73229e-05		0.834592	3.33228e-05		0.834592	2.47391e-05		0.834592	2.81273e-05		0.834592	3.51514e-05		0.834592	4.19854e-05
0.837486	2.67921e-05		0.837486	3.26423e-05		0.837486	2.43587e-05		0.837486	2.76706e-05		0.837486	3.45067e-05		0.837486	4.10524e-05
0.840379	2.62624e-05		0.840379	3.19688e-05		0.840379	2.39703e-05		0.840379	2.72057e-05		0.840379	3.38583e-05		0.840379	4.01015e-05
0.843273	2.57376e-05		0.843273	3.1303e-05		0.843273	2.35715e-05		0.843273	2.67341e-05		0.843273	3.32067e-05		0.843273	3.91376e-05
0.846167	2.52181e-05		0.846167	3.06466e-05		0.846167	2.31638e-05		0.846167	2.62575e-05		0.846167	3.25551e-05		0.846167	3.8166e-05
0.849061	2.47044e-05		0.849061	3.00039e-05		0.849061	2.27496e-05		0.849061	2.57779e-05		0.849061	3.19058e-05		0.849061	3.71894e-05
0.851955	2.41974e-05		0.851955	2.93831e-05		0.851955	2.23316e-05		0.851955	2.52976e-05		0.851955	3.12608e-05		0.851955	3.6211e-05
0.854849	2.36989e-05		0.854849	2.87936e-05		0.854849	2.19131e-05		0.854849	2.48195e-05		0.854849	3.0624e-05		0.854849	3.52364e-05
0.857743	2.32119e-05		0.857743	2.82424e-05		0.857743	2.14981e-05		0.857743	2.43469e-05		0.857743	2.99987e-05		0.857743	3.42765e-05
0.860637	2.2743e-05		0.860637	2.77186e-05		0.860637	2.10894e-05		0.860637	2.38836e-05		0.860637	2.93904e-05		0.860637	3.33417e-05
0.863531	2.23001e-05		0.863531	2.72075e-05		0.863531	2.06909e-05		0.863531	2.3435e-05		0.863531	2.8806e-05		0.863531	3.24403e-05
0.866424	2.18892e-05		0.866424	2.67186e-05		0.866424	2.03104e-05		0.866424	2.30105e-05		0.866424	2.82547e-05		0.866424	3.15848e-05
0.869318	2.15199e-05		0.869318	2.62748e-05		0.869318	1.99594e-05		0.869318	2.26234e-05		0.869318	2.77519e-05		0.869318	3.07977e-05
0.872212	2.12081e-05		0.872212	2.58993e-05		0.872212	1.9655e-05		0.872212	2.22914e-05		0.872212	2.73207e-05		0.872212	3.01213e-05
0.875106	2.09796e-05		0.875106	2.56221e-05		0.875106	1.94255e-05		0.875106	2.20435e-05		0.875106	2.69992e-05		0.875106	2.96197e-05
0.878	2.08912e-05		0.878	2.55142e-05		0.878	1.93336e-05		0.878	2.19451e-05		0.878	2.68719e-05		0.878	2.94219e-05

## Sheet: oh distribution 
SN 0			SN 0.2			SN 0.4			SN 0.6			SN 0.8			SN 1
Axial distance	oh mass fraction		Axial distance	oh mass fraction		Axial distance	oh mass fraction		Axial distance	oh mass fraction		Axial distance	oh mass fraction		Axial distance	oh mass fraction
0.00115113	9.21181e-06		0.00115113	9.37932e-06		0.00115113	1.09344e-05		0.00115113	9.91677e-06		0.00115113	1.23476e-05		0.00115113	1.27885e-05
0.00404502	1.38398e-05		0.00404502	1.4216e-05		0.00404502	1.62088e-05		0.00404502	1.59052e-05		0.00404502	1.87772e-05		0.00404502	1.90677e-05
0.00693891	1.69251e-05		0.00693891	1.76676e-05		0.00693891	1.95036e-05		0.00693891	2.02629e-05		0.00693891	2.30808e-05		0.00693891	2.30709e-05
0.0098328	1.81943e-05		0.0098328	1.92984e-05		0.0098328	2.07084e-05		0.0098328	2.28007e-05		0.0098328	2.48846e-05		0.0098328	2.42964e-05
0.0127267	1.80228e-05		0.0127267	1.91459e-05		0.0127267	2.02597e-05		0.0127267	2.33893e-05		0.0127267	2.44101e-05		0.0127267	2.31464e-05
0.0156206	1.67801e-05		0.0156206	1.77542e-05		0.0156206	1.85705e-05		0.0156206	2.20283e-05		0.0156206	2.2023e-05		0.0156206	1.98168e-05
0.0185145	1.47539e-05		0.0185145	1.56165e-05		0.0185145	1.61208e-05		0.0185145	1.91119e-05		0.0185145	1.79462e-05		0.0185145	1.51265e-05
0.0214084	1.21726e-05		0.0214084	1.28916e-05		0.0214084	1.32773e-05		0.0214084	1.51832e-05		0.0214084	1.2734e-05		0.0214084	1.00568e-05
0.0243023	9.34143e-06		0.0243023	9.78808e-06		0.0243023	1.03123e-05		0.0243023	1.07007e-05		0.0243023	7.46756e-06		0.0243023	5.43616e-06
0.0271961	6.46942e-06		0.0271961	6.54839e-06		0.0271961	7.43354e-06		0.0271961	6.7743e-06		0.0271961	3.8034e-06		0.0271961	2.45956e-06
0.03009	3.70153e-06		0.03009	3.37087e-06		0.03009	4.76605e-06		0.03009	3.5493e-06		0.03009	1.9887e-06		0.03009	1.13669e-06
0.0329839	1.17762e-06		0.0329839	9.0599e-07		0.0329839	2.39245e-06		0.0329839	9.65441e-07		0.0329839	1.16301e-06		0.0329839	7.93997e-07
0.0358778	1.46367e-18		0.0358778	7.65176e-17		0.0358778	6.42164e-07		0.0358778	1.73743e-17		0.0358778	6.68302e-07		0.0358778	5.75052e-07
0.0387717	0		0.0387717	0		0.0387717	0		0.0387717	0		0.0387717	2.44051e-07		0.0387717	1.99196e-07
0.0416656	0		0.0416656	0		0.0416656	0		0.0416656	4.39915e-17		0.0416656	4.85038e-08		0.0416656	9.42422e-09
0.0445595	0		0.0445595	1.12486e-16		0.0445595	0		0.0445595	4.39915e-17		0.0445595	0		0.0445595	1.14605e-16
0.0474534	2.31477e-17		0.0474534	1.44795e-16		0.0474534	1.35525e-19		0.0474534	0		0.0474534	0		0.0474534	1.70931e-17
0.0503473	2.31477e-17		0.0503473	3.23092e-17		0.0503473	6.55942e-18		0.0503473	0		0.0503473	0		0.0503473	2.94344e-19
0.0532412	1.1872e-17		0.0532412	0		0.0532412	1.1357e-17		0.0532412	0		0.0532412	8.64821e-18		0.0532412	6.30289e-08
0.056135	2.0112e-17		0.056135	0		0.056135	4.93312e-18		0.056135	0		0.056135	6.85605e-17		0.056135	2.90471e-07
0.0590289	8.23994e-18		0.0590289	0		0.0590289	7.57586e-17		0.0590289	9.58096e-17		0.0590289	7.85776e-17		0.0590289	3.1377e-07
0.0619228	0		0.0619228	0		0.0619228	7.57586e-17		0.0619228	9.58096e-17		0.0619228	1.86652e-17		0.0619228	8.63287e-08
0.0648167	0		0.0648167	1.0159e-16		0.0648167	0		0.0648167	4.59837e-17		0.0648167	2.86365e-17		0.0648167	3.24803e-17
0.0677106	0		0.0677106	1.0159e-16		0.0677106	1.22976e-16		0.0677106	9.45623e-07		0.0677106	6.80472e-17		0.0677106	2.57735e-17
0.0706045	0		0.0706045	2.80266e-17		0.0706045	1.22976e-16		0.0706045	4.99703e-06		0.0706045	1.56249e-06		0.0706045	2.57735e-17
0.0734984	9.6765e-17		0.0734984	2.80266e-17		0.0734984	2.6834e-17		0.0734984	2.82214e-05		0.0734984	8.91266e-06		0.0734984	0
0.0763923	1.30538e-16		0.0763923	5.97937e-17		0.0763923	1.19696e-16		0.0763923	4.01109e-05		0.0763923	4.03038e-05		0.0763923	0
0.0792862	3.37729e-17		0.0792862	1.01102e-16		0.0792862	2.66687e-07		0.0792862	1.59408e-05		0.0792862	3.66022e-05		0.0792862	7.62262e-07
0.0821801	0		0.0821801	1.25984e-16		0.0821801	1.17274e-06		0.0821801	3.07985e-06		0.0821801	3.6485e-06		0.0821801	3.63994e-06
0.085074	6.87926e-17		0.085074	8.46762e-17		0.085074	2.60773e-06		0.085074	2.0606e-05		0.085074	4.67147e-06		0.085074	2.27315e-05
0.085074	6.87926e-17		0.085074	8.46762e-17		0.085074	2.60773e-06		0.085074	2.0606e-05		0.085074	4.67147e-06		0.085074	2.27315e-05
0.0879678	6.87926e-17		0.0879678	1.06794e-17		0.0879678	4.21953e-06		0.0879678	5.51005e-05		0.0879678	2.31629e-05		0.0879678	2.95464e-05
0.0908617	2.66714e-17		0.0908617	8.20199e-17		0.0908617	5.95045e-06		0.0908617	8.66144e-05		0.0908617	5.41302e-05		0.0908617	9.69258e-06
0.0937556	6.06611e-17		0.0937556	7.13405e-17		0.0937556	7.5237e-06		0.0937556	0.000111286		0.0937556	8.05338e-05		0.0937556	1.30972e-16
0.0966495	3.39897e-17		0.0966495	4.25007e-17		0.0966495	7.377e-06		0.0966495	0.00012714		0.0966495	0.000100167		0.0966495	6.39545e-06
0.0995434	5.61075e-17		0.0995434	8.09899e-17		0.0995434	5.94529e-06		0.0995434	0.000116126		0.0995434	0.000107136		0.0995434	2.22107e-05
0.102437	9.12356e-17		0.102437	3.84892e-17		0.102437	5.73842e-06		0.102437	9.02893e-05		0.102437	9.08077e-05		0.102437	4.30007e-05
0.105331	6.9931e-17		0.105331	0		0.105331	6.62791e-06		0.105331	6.89523e-05		0.105331	6.72092e-05		0.105331	6.01455e-05
0.108225	4.87808e-07		0.108225	4.75965e-17		0.108225	2.60735e-05		0.108225	5.29466e-05		0.108225	4.89277e-05		0.108225	7.55668e-05
0.111119	2.75689e-06		0.111119	1.22732e-16		0.111119	3.38222e-05		0.111119	4.10047e-05		0.111119	3.60499e-05		0.111119	9.26162e-05
0.114013	7.7201e-06		0.114013	8.71285e-07		0.114013	1.20947e-05		0.114013	3.20361e-05		0.114013	2.70313e-05		0.114013	9.0321e-05
0.116907	1.33138e-05		0.116907	3.22649e-06		0.116907	7.97111e-07		0.116907	2.51747e-05		0.116907	2.05732e-05		0.116907	7.08094e-05
0.119801	1.75483e-05		0.119801	5.88915e-06		0.119801	7.3911e-07		0.119801	1.98618e-05		0.119801	1.58557e-05		0.119801	5.3397e-05
0.122695	2.01066e-05		0.122695	8.06325e-06		0.122695	7.73113e-06		0.122695	1.57183e-05		0.122695	1.23609e-05		0.122695	4.02606e-05
0.125588	2.01159e-05		0.125588	9.31422e-06		0.125588	3.04306e-05		0.125588	1.24633e-05		0.125588	9.76138e-06		0.125588	3.07116e-05
0.128482	1.72939e-05		0.128482	8.57063e-06		0.128482	5.77983e-05		0.128482	9.90319e-06		0.128482	7.80393e-06		0.128482	2.37777e-05
0.131376	1.28191e-05		0.131376	5.94416e-06		0.131376	8.01582e-05		0.131376	7.88147e-06		0.131376	6.30713e-06		0.131376	1.86924e-05
0.13427	8.29998e-06		0.13427	2.74015e-06		0.13427	9.92216e-05		0.13427	6.27417e-06		0.13427	5.16932e-06		0.13427	1.4933e-05
0.137164	5.29316e-06		0.137164	6.92329e-07		0.137164	0.000122656		0.137164	5.00742e-06		0.137164	4.31165e-06		0.137164	1.21274e-05
0.140058	4.14333e-06		0.140058	7.08045e-07		0.140058	0.000154566		0.140058	4.02605e-06		0.140058	3.67182e-06		0.140058	1.00026e-05
0.142952	4.65927e-06		0.142952	2.3852e-06		0.142952	0.000183239		0.142952	3.26745e-06		0.142952	3.19931e-06		0.142952	8.39511e-06
0.145846	6.97141e-06		0.145846	5.92018e-06		0.145846	0.000186477		0.145846	2.67621e-06		0.145846	2.84646e-06		0.145846	7.18708e-06
0.14874	1.01383e-05		0.14874	8.78649e-06		0.14874	0.000162599		0.14874	2.22096e-06		0.14874	2.58649e-06		0.14874	6.28006e-06
0.151633	1.08799e-05		0.151633	6.51231e-06		0.151633	0.000134156		0.151633	1.87211e-06		0.151633	2.39615e-06		0.151633	5.59576e-06
0.154527	6.5395e-06		0.154527	2.82035e-06		0.154527	0.000108484		0.154527	1.60811e-06		0.154527	2.25017e-06		0.154527	5.07889e-06
0.157421	1.89389e-06		0.157421	3.79475e-06		0.157421	8.71577e-05		0.157421	1.4189e-06		0.157421	2.13946e-06		0.157421	4.68607e-06
0.160315	1.85318e-06		0.160315	1.06451e-05		0.160315	6.99803e-05		0.160315	1.28214e-06		0.160315	2.05501e-06		0.160315	4.38617e-06
0.163209	6.85636e-06		0.163209	2.09411e-05		0.163209	5.6312e-05		0.163209	1.17806e-06		0.163209	1.98984e-06		0.163209	4.15489e-06
0.166103	1.4289e-05		0.166103	3.14744e-05		0.166103	4.54268e-05		0.166103	1.10265e-06		0.166103	1.93869e-06		0.166103	3.97478e-06
0.166103	1.4289e-05		0.166103	3.14744e-05		0.166103	4.54268e-05		0.166103	1.10265e-06		0.166103	1.93869e-06		0.166103	3.97478e-06
0.168997	2.25423e-05		0.168997	4.0744e-05		0.168997	3.66973e-05		0.168997	1.04814e-06		0.168997	1.89796e-06		0.168997	3.83744e-06
0.171891	3.15454e-05		0.171891	4.74019e-05		0.171891	2.96877e-05		0.171891	1.00772e-06		0.171891	1.86499e-06		0.171891	3.73585e-06
0.174785	3.94347e-05		0.174785	5.14296e-05		0.174785	2.40402e-05		0.174785	9.77625e-07		0.174785	1.83761e-06		0.174785	3.66075e-06
0.177678	4.52468e-05		0.177678	5.35894e-05		0.177678	1.94342e-05		0.177678	9.5493e-07		0.177678	1.81491e-06		0.177678	3.60565e-06
0.180572	4.89352e-05		0.180572	5.424e-05		0.180572	1.56703e-05		0.180572	9.37553e-07		0.180572	1.79615e-06		0.180572	3.56591e-06
0.183466	5.11566e-05		0.183466	5.37181e-05		0.183466	1.26376e-05		0.183466	9.24162e-07		0.183466	1.7782e-06		0.183466	3.53824e-06
0.18636	5.21364e-05		0.18636	5.23304e-05		0.18636	1.01874e-05		0.18636	9.13878e-07		0.18636	1.75992e-06		0.18636	3.52042e-06
0.189254	5.22475e-05		0.189254	5.06025e-05		0.189254	8.19555e-06		0.189254	9.05582e-07		0.189254	1.74328e-06		0.189254	3.51048e-06
0.192148	5.16686e-05		0.192148	4.85885e-05		0.192148	6.5994e-06		0.192148	8.981e-07		0.192148	1.72833e-06		0.192148	3.50617e-06
0.195042	5.06076e-05		0.195042	4.59331e-05		0.195042	5.33562e-06		0.195042	8.90843e-07		0.195042	1.71401e-06		0.195042	3.50597e-06
0.197936	4.9226e-05		0.197936	4.33929e-05		0.197936	4.33285e-06		0.197936	8.83554e-07		0.197936	1.69977e-06		0.197936	3.50915e-06
0.20083	4.78438e-05		0.20083	4.09202e-05		0.20083	3.508e-06		0.20083	8.76437e-07		0.20083	1.68565e-06		0.20083	3.51529e-06
0.203723	4.66302e-05		0.203723	3.8811e-05		0.203723	2.92974e-06		0.203723	8.7029e-07		0.203723	1.67178e-06		0.203723	3.52421e-06
0.206617	4.53169e-05		0.206617	3.729e-05		0.206617	2.53985e-06		0.206617	8.65234e-07		0.206617	1.65811e-06		0.206617	3.5359e-06
0.209511	4.34177e-05		0.209511	3.61168e-05		0.209511	2.20857e-06		0.209511	8.59371e-07		0.209511	1.6446e-06		0.209511	3.55046e-06
0.212405	4.11614e-05		0.212405	3.51117e-05		0.212405	1.96178e-06		0.212405	8.51048e-07		0.212405	1.63121e-06		0.212405	3.56819e-06
0.215299	3.92744e-05		0.215299	3.43998e-05		0.215299	1.77636e-06		0.215299	8.41484e-07		0.215299	1.61791e-06		0.215299	3.59002e-06
0.215299	3.92744e-05		0.215299	3.43998e-05		0.215299	1.77636e-06		0.215299	8.41484e-07		0.215299	1.61791e-06		0.215299	3.59002e-06
0.218193	3.75191e-05		0.218193	3.40997e-05		0.218193	1.63886e-06		0.218193	8.32455e-07		0.218193	1.60475e-06		0.218193	3.61337e-06
0.221087	3.47755e-05		0.221087	3.4649e-05		0.221087	1.53517e-06		0.221087	8.2465e-07		0.221087	1.59174e-06		0.221087	3.63398e-06
0.223981	3.14491e-05		0.223981	3.56603e-05		0.223981	1.45594e-06		0.223981	8.18091e-07		0.223981	1.57874e-06		0.223981	3.65023e-06
0.226875	2.86881e-05		0.226875	3.66726e-05		0.226875	1.39469e-06		0.226875	8.12336e-07		0.226875	1.56562e-06		0.226875	3.66139e-06
0.229768	2.53119e-05		0.229768	3.78962e-05		0.229768	1.34684e-06		0.229768	8.07027e-07		0.229768	1.55228e-06		0.229768	3.66753e-06
0.232662	2.29679e-05		0.232662	3.87363e-05		0.232662	1.30918e-06		0.232662	8.02053e-07		0.232662	1.53865e-06		0.232662	3.66904e-06
0.235556	2.25633e-05		0.235556	4.06929e-05		0.235556	1.27937e-06		0.235556	7.97458e-07		0.235556	1.52474e-06		0.235556	3.66642e-06
0.23845	2.26199e-05		0.23845	4.30757e-05		0.23845	1.25557e-06		0.23845	7.93257e-07		0.23845	1.51086e-06		0.23845	3.66013e-06
0.241344	2.39432e-05		0.241344	4.43509e-05		0.241344	1.2368e-06		0.241344	7.89429e-07		0.241344	1.4973e-06		0.241344	3.65068e-06
0.244238	2.55849e-05		0.244238	4.47992e-05		0.244238	1.22268e-06		0.244238	7.85936e-07		0.244238	1.48407e-06		0.244238	3.6387e-06
0.247132	2.80667e-05		0.247132	4.44682e-05		0.247132	1.21247e-06		0.247132	7.82733e-07		0.247132	1.47113e-06		0.247132	3.62462e-06
0.250026	3.19312e-05		0.250026	4.44345e-05		0.250026	1.20496e-06		0.250026	7.7977e-07		0.250026	1.45848e-06		0.250026	3.60869e-06
0.25292	3.48102e-05		0.25292	4.48958e-05		0.25292	1.19861e-06		0.25292	7.77034e-07		0.25292	1.44609e-06		0.25292	3.59114e-06
0.255814	3.6672e-05		0.255814	4.50829e-05		0.255814	1.1931e-06		0.255814	7.74689e-07		0.255814	1.43395e-06		0.255814	3.57215e-06
0.258707	3.85269e-05		0.258707	4.43004e-05		0.258707	1.18947e-06		0.258707	7.72889e-07		0.258707	1.42202e-06		0.258707	3.55189e-06
0.261601	3.9241e-05		0.261601	4.17815e-05		0.261601	1.18864e-06		0.261601	7.71571e-07		0.261601	1.41023e-06		0.261601	3.53052e-06
0.264495	3.85441e-05		0.264495	3.83394e-05		0.264495	1.18987e-06		0.264495	7.70628e-07		0.264495	1.39892e-06		0.264495	3.50816e-06
0.267389	3.83895e-05		0.267389	3.47327e-05		0.267389	1.19089e-06		0.267389	7.69982e-07		0.267389	1.38851e-06		0.267389	3.48494e-06
0.270283	3.92741e-05		0.270283	3.45891e-05		0.270283	1.19068e-06		0.270283	7.69587e-07		0.270283	1.37905e-06		0.270283	3.46097e-06
0.273177	4.01503e-05		0.273177	4.01172e-05		0.273177	1.18954e-06		0.273177	7.6941e-07		0.273177	1.37061e-06		0.273177	3.43632e-06
0.276071	3.99668e-05		0.276071	4.81099e-05		0.276071	1.18762e-06		0.276071	7.69428e-07		0.276071	1.36322e-06		0.276071	3.41108e-06
0.278965	3.81835e-05		0.278965	5.69891e-05		0.278965	1.18629e-06		0.278965	7.69617e-07		0.278965	1.35691e-06		0.278965	3.38532e-06
0.281859	3.52109e-05		0.281859	6.6182e-05		0.281859	1.18822e-06		0.281859	7.69956e-07		0.281859	1.35171e-06		0.281859	3.35908e-06
0.284752	3.13012e-05		0.284752	7.34675e-05		0.284752	1.1944e-06		0.284752	7.7042e-07		0.284752	1.34767e-06		0.284752	3.3324e-06
0.287646	2.70743e-05		0.287646	7.7113e-05		0.287646	1.20109e-06		0.287646	7.70987e-07		0.287646	1.34488e-06		0.287646	3.30552e-06
0.29054	2.49014e-05		0.29054	7.82387e-05		0.29054	1.20089e-06		0.29054	7.71623e-07		0.29054	1.34345e-06		0.29054	3.27868e-06
0.293434	2.56198e-05		0.293434	7.84293e-05		0.293434	1.19467e-06		0.293434	7.72503e-07		0.293434	1.34321e-06		0.293434	3.2519e-06
0.296328	2.91351e-05		0.296328	7.76474e-05		0.296328	1.18993e-06		0.296328	7.73746e-07		0.296328	1.34309e-06		0.296328	3.22524e-06
0.299222	3.39121e-05		0.299222	7.57964e-05		0.299222	1.18906e-06		0.299222	7.75245e-07		0.299222	1.34219e-06		0.299222	3.19873e-06
0.302116	3.94174e-05		0.302116	7.38242e-05		0.302116	1.19099e-06		0.302116	7.76965e-07		0.302116	1.34049e-06		0.302116	3.17241e-06
0.30501	4.65346e-05		0.30501	7.17678e-05		0.30501	1.19407e-06		0.30501	7.78883e-07		0.30501	1.338e-06		0.30501	3.1463e-06
0.307904	5.40581e-05		0.307904	6.98401e-05		0.307904	1.19721e-06		0.307904	7.80982e-07		0.307904	1.33468e-06		0.307904	3.12043e-06
0.310797	6.11628e-05		0.310797	6.85546e-05		0.310797	1.19989e-06		0.310797	7.83251e-07		0.310797	1.33044e-06		0.310797	3.09483e-06
0.313691	6.61941e-05		0.313691	6.77628e-05		0.313691	1.20204e-06		0.313691	7.85666e-07		0.313691	1.32535e-06		0.313691	3.06948e-06
0.313691	6.61941e-05		0.313691	6.77628e-05		0.313691	1.20204e-06		0.313691	7.85666e-07		0.313691	1.32535e-06		0.313691	3.06948e-06
0.316585	6.92777e-05		0.316585	6.75364e-05		0.316585	1.2035e-06		0.316585	7.87547e-07		0.316585	1.31921e-06		0.316585	3.04429e-06
0.319479	7.18949e-05		0.319479	6.78475e-05		0.319479	1.20412e-06		0.319479	7.88371e-07		0.319479	1.31219e-06		0.319479	3.01917e-06
0.322373	7.38337e-05		0.322373	6.85797e-05		0.322373	1.20397e-06		0.322373	7.8835e-07		0.322373	1.30471e-06		0.322373	2.99417e-06
0.325267	7.51193e-05		0.325267	6.98659e-05		0.325267	1.203e-06		0.325267	7.87614e-07		0.325267	1.2967e-06		0.325267	2.96933e-06
0.328161	7.61474e-05		0.328161	7.03116e-05		0.328161	1.20148e-06		0.328161	7.86244e-07		0.328161	1.28818e-06		0.328161	2.94471e-06
0.331055	7.74889e-05		0.331055	7.10902e-05		0.331055	1.20017e-06		0.331055	7.8429e-07		0.331055	1.27917e-06		0.331055	2.92033e-06
0.333949	7.81361e-05		0.333949	7.22373e-05		0.333949	1.19944e-06		0.333949	7.8178e-07		0.333949	1.26971e-06		0.333949	2.89619e-06
0.336842	7.68395e-05		0.336842	7.12587e-05		0.336842	1.19919e-06		0.336842	7.78725e-07		0.336842	1.25979e-06		0.336842	2.87228e-06
0.339736	7.4595e-05		0.339736	7.19377e-05		0.339736	1.20001e-06		0.339736	7.7512e-07		0.339736	1.24941e-06		0.339736	2.8486e-06
0.34263	7.32078e-05		0.34263	7.34817e-05		0.34263	1.20229e-06		0.34263	7.7094e-07		0.34263	1.23858e-06		0.34263	2.82513e-06
0.345524	7.30164e-05		0.345524	7.56041e-05		0.345524	1.20571e-06		0.345524	7.66138e-07		0.345524	1.22758e-06		0.345524	2.80185e-06
0.348418	7.34728e-05		0.348418	8.00565e-05		0.348418	1.20992e-06		0.348418	7.60636e-07		0.348418	1.2167e-06		0.348418	2.77873e-06
0.351312	7.46081e-05		0.351312	8.46233e-05		0.351312	1.21469e-06		0.351312	7.54309e-07		0.351312	1.20595e-06		0.351312	2.75576e-06
0.354206	7.57764e-05		0.354206	8.93513e-05		0.354206	1.21988e-06		0.354206	7.46954e-07		0.354206	1.19534e-06		0.354206	2.73288e-06
0.3571	7.73668e-05		0.3571	9.2819e-05		0.3571	1.22539e-06		0.3571	7.39393e-07		0.3571	1.18484e-06		0.3571	2.71008e-06
0.359994	7.84382e-05		0.359994	9.59712e-05		0.359994	1.23115e-06		0.359994	7.32558e-07		0.359994	1.17447e-06		0.359994	2.6873e-06
0.362887	7.82114e-05		0.362887	9.84296e-05		0.362887	1.23711e-06		0.362887	7.26445e-07		0.362887	1.16422e-06		0.362887	2.66459e-06
0.365781	7.83536e-05		0.365781	0.000102794		0.365781	1.24322e-06		0.365781	7.21071e-07		0.365781	1.15415e-06		0.365781	2.64202e-06
0.368675	7.62167e-05		0.368675	0.000109074		0.368675	1.24945e-06		0.368675	7.16444e-07		0.368675	1.1446e-06		0.368675	2.61957e-06
0.371569	7.17297e-05		0.371569	0.000113388		0.371569	1.25578e-06		0.371569	7.12566e-07		0.371569	1.1359e-06		0.371569	2.5972e-06
0.374463	6.86471e-05		0.374463	0.000117264		0.374463	1.26217e-06		0.374463	7.09438e-07		0.374463	1.12801e-06		0.374463	2.5749e-06
0.377357	6.85999e-05		0.377357	0.000122841		0.377357	1.2686e-06		0.377357	7.07062e-07		0.377357	1.12099e-06		0.377357	2.55264e-06
0.380251	7.25498e-05		0.380251	0.000129528		0.380251	1.27502e-06		0.380251	7.05441e-07		0.380251	1.11486e-06		0.380251	2.53037e-06
0.383145	7.82728e-05		0.383145	0.000134032		0.383145	1.2814e-06		0.383145	7.04574e-07		0.383145	1.10961e-06		0.383145	2.50808e-06
0.386039	8.3861e-05		0.386039	0.000138057		0.386039	1.28765e-06		0.386039	7.04449e-07		0.386039	1.10525e-06		0.386039	2.48571e-06
0.388932	9.02284e-05		0.388932	0.00014543		0.388932	1.29367e-06		0.388932	7.0505e-07		0.388932	1.10177e-06		0.388932	2.46321e-06
0.391826	9.29666e-05		0.391826	0.000155588		0.391826	1.29933e-06		0.391826	7.06354e-07		0.391826	1.09963e-06		0.391826	2.4405e-06
0.39472	9.30136e-05		0.39472	0.000167332		0.39472	1.30451e-06		0.39472	7.08339e-07		0.39472	1.09926e-06		0.39472	2.41747e-06
0.397614	9.4528e-05		0.397614	0.000179463		0.397614	1.30908e-06		0.397614	7.10987e-07		0.397614	1.10076e-06		0.397614	2.39418e-06
0.400508	9.96819e-05		0.400508	0.000188188		0.400508	1.3129e-06		0.400508	7.14291e-07		0.400508	1.10419e-06		0.400508	2.37068e-06
0.403402	0.000111276		0.403402	0.0001931		0.403402	1.31678e-06		0.403402	7.1832e-07		0.403402	1.10968e-06		0.403402	2.34698e-06
0.403402	0.000111276		0.403402	0.0001931		0.403402	1.31678e-06		0.403402	7.1832e-07		0.403402	1.10968e-06		0.403402	2.34698e-06
0.406296	0.000126702		0.406296	0.000199427		0.406296	1.32146e-06		0.406296	7.22367e-07		0.406296	1.11567e-06		0.406296	2.32347e-06
0.40919	0.000141416		0.40919	0.000213818		0.40919	1.3268e-06		0.40919	7.2571e-07		0.40919	1.12052e-06		0.40919	2.30055e-06
0.412084	0.000151666		0.412084	0.000238561		0.412084	1.33271e-06		0.412084	7.28397e-07		0.412084	1.12447e-06		0.412084	2.27825e-06
0.414977	0.000158432		0.414977	0.000270439		0.414977	1.33909e-06		0.414977	7.30382e-07		0.414977	1.12768e-06		0.414977	2.25653e-06
0.417871	0.00016685		0.417871	0.000301923		0.417871	1.34585e-06		0.417871	7.31912e-07		0.417871	1.1301e-06		0.417871	2.23536e-06
0.420765	0.000182282		0.420765	0.000326177		0.420765	1.35295e-06		0.420765	7.33249e-07		0.420765	1.1317e-06		0.420765	2.21473e-06
0.423659	0.000206682		0.423659	0.000346686		0.423659	1.36037e-06		0.423659	7.3437e-07		0.423659	1.13248e-06		0.423659	2.19462e-06
0.426553	0.000238669		0.426553	0.000364211		0.426553	1.36812e-06		0.426553	7.35274e-07		0.426553	1.13244e-06		0.426553	2.17504e-06
0.429447	0.000274335		0.429447	0.000378065		0.429447	1.3762e-06		0.429447	7.35972e-07		0.429447	1.13161e-06		0.429447	2.15596e-06
0.432341	0.000307219		0.432341	0.000394185		0.432341	1.3846e-06		0.432341	7.36485e-07		0.432341	1.13002e-06		0.432341	2.13738e-06
0.435235	0.000333299		0.435235	0.000415592		0.435235	1.39332e-06		0.435235	7.36835e-07		0.435235	1.12785e-06		0.435235	2.11926e-06
0.438129	0.000353957		0.438129	0.000442912		0.438129	1.40238e-06		0.438129	7.37042e-07		0.438129	1.12526e-06		0.438129	2.10153e-06
0.441023	0.000370109		0.441023	0.000474772		0.441023	1.41177e-06		0.441023	7.37125e-07		0.441023	1.12231e-06		0.441023	2.08419e-06
0.443916	0.000387858		0.443916	0.000510341		0.443916	1.42147e-06		0.443916	7.37093e-07		0.443916	1.11901e-06		0.443916	2.06728e-06
0.44681	0.000405736		0.44681	0.000544611		0.44681	1.43145e-06		0.44681	7.36953e-07		0.44681	1.1154e-06		0.44681	2.05082e-06
0.449704	0.000421988		0.449704	0.000569193		0.449704	1.44164e-06		0.449704	7.36703e-07		0.449704	1.11149e-06		0.449704	2.03484e-06
0.452598	0.000442163		0.452598	0.000581926		0.452598	1.45196e-06		0.452598	7.36339e-07		0.452598	1.10728e-06		0.452598	2.01938e-06
0.455492	0.000462029		0.455492	0.000584751		0.455492	1.46234e-06		0.455492	7.3585e-07		0.455492	1.10287e-06		0.455492	2.00448e-06
0.458386	0.000480253		0.458386	0.000580334		0.458386	1.47267e-06		0.458386	7.35219e-07		0.458386	1.09836e-06		0.458386	1.9902e-06
0.46128	0.000498444		0.46128	0.000569858		0.46128	1.48283e-06		0.46128	7.34426e-07		0.46128	1.09376e-06		0.46128	1.97662e-06
0.464174	0.000514572		0.464174	0.000553736		0.464174	1.49272e-06		0.464174	7.33443e-07		0.464174	1.08908e-06		0.464174	1.96383e-06
0.467068	0.000523947		0.467068	0.000533834		0.467068	1.50226e-06		0.467068	7.32239e-07		0.467068	1.08432e-06		0.467068	1.95141e-06
0.469961	0.000523566		0.469961	0.000511996		0.469961	1.51137e-06		0.469961	7.30783e-07		0.469961	1.07947e-06		0.469961	1.9389e-06
0.472855	0.000515786		0.472855	0.000489439		0.472855	1.5199e-06		0.472855	7.29308e-07		0.472855	1.07451e-06		0.472855	1.9263e-06
0.475749	0.000503009		0.475749	0.000466609		0.475749	1.5277e-06		0.475749	7.28067e-07		0.475749	1.06946e-06		0.475749	1.9136e-06
0.478643	0.000485237		0.478643	0.000443159		0.478643	1.53558e-06		0.478643	7.27059e-07		0.478643	1.06438e-06		0.478643	1.90079e-06
0.481537	0.000465073		0.481537	0.000418418		0.481537	1.54438e-06		0.481537	7.26281e-07		0.481537	1.0594e-06		0.481537	1.88787e-06
0.484431	0.000443776		0.484431	0.000392961		0.484431	1.55393e-06		0.484431	7.25729e-07		0.484431	1.0545e-06		0.484431	1.87484e-06
0.487325	0.000419557		0.487325	0.000367726		0.487325	1.56406e-06		0.487325	7.25403e-07		0.487325	1.04966e-06		0.487325	1.86171e-06
0.490219	0.000394166		0.490219	0.000343266		0.490219	1.57484e-06		0.490219	7.25304e-07		0.490219	1.04485e-06		0.490219	1.84846e-06
0.493113	0.000369496		0.493113	0.000319833		0.493113	1.58682e-06		0.493113	7.25431e-07		0.493113	1.04004e-06		0.493113	1.83509e-06
0.496006	0.000345701		0.496006	0.000297436		0.496006	1.60011e-06		0.496006	7.25775e-07		0.496006	1.03518e-06		0.496006	1.82157e-06
0.4989	0.000323729		0.4989	0.000276103		0.4989	1.61411e-06		0.4989	7.26321e-07		0.4989	1.03042e-06		0.4989	1.8079e-06
0.501794	0.000302928		0.501794	0.000255946		0.501794	1.62841e-06		0.501794	7.2704e-07		0.501794	1.02589e-06		0.501794	1.79424e-06
0.504688	0.000282012		0.504688	0.000237065		0.504688	1.64293e-06		0.504688	7.27895e-07		0.504688	1.02157e-06		0.504688	1.78081e-06
0.507582	0.000261391		0.507582	0.000219468		0.507582	1.65772e-06		0.507582	7.28849e-07		0.507582	1.01745e-06		0.507582	1.76759e-06
0.510476	0.000241555		0.510476	0.000203081		0.510476	1.67274e-06		0.510476	7.29882e-07		0.510476	1.01351e-06		0.510476	1.75458e-06
0.51337	0.000222768		0.51337	0.000187697		0.51337	1.68785e-06		0.51337	7.30983e-07		0.51337	1.00967e-06		0.51337	1.74178e-06
0.516264	0.000205196		0.516264	0.000173349		0.516264	1.70277e-06		0.516264	7.3212e-07		0.516264	1.00587e-06		0.516264	1.72914e-06
0.519158	0.000188825		0.519158	0.000160123		0.519158	1.71717e-06		0.519158	7.33247e-07		0.519158	1.00206e-06		0.519158	1.71662e-06
0.522051	0.000173664		0.522051	0.000147877		0.522051	1.73061e-06		0.522051	7.34295e-07		0.522051	9.98366e-07		0.522051	1.70413e-06
0.524945	0.000159737		0.524945	0.000136538		0.524945	1.74249e-06		0.524945	7.35161e-07		0.524945	9.94916e-07		0.524945	1.69151e-06
0.524945	0.000159737		0.524945	0.000136538		0.524945	1.74249e-06		0.524945	7.35161e-07		0.524945	9.94916e-07		0.524945	1.69151e-06
0.527839	0.000146974		0.527839	0.000126034		0.527839	1.75355e-06		0.527839	7.36009e-07		0.527839	9.91694e-07		0.527839	1.67898e-06
0.530733	0.00013524		0.530733	0.000116357		0.530733	1.76478e-06		0.530733	7.37065e-07		0.530733	9.88684e-07		0.530733	1.66684e-06
0.533627	0.000124435		0.533627	0.000107525		0.533627	1.77602e-06		0.533627	7.38289e-07		0.533627	9.85865e-07		0.533627	1.6551e-06
0.536521	0.000114508		0.536521	9.94211e-05		0.536521	1.78701e-06		0.536521	7.39629e-07		0.536521	9.8322e-07		0.536521	1.64384e-06
0.539415	0.000105467		0.539415	9.19286e-05		0.539415	1.79762e-06		0.539415	7.41131e-07		0.539415	9.8069e-07		0.539415	1.63305e-06
0.542309	9.71673e-05		0.542309	8.49878e-05		0.542309	1.80775e-06		0.542309	7.42865e-07		0.542309	9.78239e-07		0.542309	1.62265e-06
0.545203	8.94485e-05		0.545203	7.85285e-05		0.545203	1.81725e-06		0.545203	7.44824e-07		0.545203	9.75807e-07		0.545203	1.61265e-06
0.548096	8.23521e-05		0.548096	7.25574e-05		0.548096	1.82702e-06		0.548096	7.46976e-07		0.548096	9.73355e-07		0.548096	1.603e-06
0.55099	7.57782e-05		0.55099	6.70531e-05		0.55099	1.83804e-06		0.55099	7.49292e-07		0.55099	9.71186e-07		0.55099	1.59365e-06
0.553884	6.96764e-05		0.553884	6.19964e-05		0.553884	1.8503e-06		0.553884	7.51754e-07		0.553884	9.69507e-07		0.553884	1.5846e-06
0.556778	6.41942e-05		0.556778	5.73998e-05		0.556778	1.86375e-06		0.556778	7.54323e-07		0.556778	9.6799e-07		0.556778	1.57589e-06
0.559672	5.92686e-05		0.559672	5.31516e-05		0.559672	1.87832e-06		0.559672	7.56885e-07		0.559672	9.66287e-07		0.559672	1.56756e-06
0.562566	5.47393e-05		0.562566	4.91605e-05		0.562566	1.89394e-06		0.562566	7.5928e-07		0.562566	9.6443e-07		0.562566	1.55957e-06
0.56546	5.05796e-05		0.56546	4.54696e-05		0.56546	1.91052e-06		0.56546	7.61393e-07		0.56546	9.62589e-07		0.56546	1.5519e-06
0.568354	4.67356e-05		0.568354	4.2111e-05		0.568354	1.92797e-06		0.568354	7.63318e-07		0.568354	9.6085e-07		0.568354	1.54455e-06
0.571248	4.31129e-05		0.571248	3.90209e-05		0.571248	1.94621e-06		0.571248	7.65431e-07		0.571248	9.59212e-07		0.571248	1.53744e-06
0.574142	3.97203e-05		0.574142	3.61435e-05		0.574142	1.96514e-06		0.574142	7.67746e-07		0.574142	9.57633e-07		0.574142	1.5304e-06
0.577035	3.66331e-05		0.577035	3.35094e-05		0.577035	1.98468e-06		0.577035	7.69788e-07		0.577035	9.56066e-07		0.577035	1.52333e-06
0.579929	3.38261e-05		0.579929	3.11276e-05		0.579929	2.00473e-06		0.579929	7.71541e-07		0.579929	9.54476e-07		0.579929	1.51641e-06
0.582823	3.12403e-05		0.582823	2.89762e-05		0.582823	2.0252e-06		0.582823	7.73274e-07		0.582823	9.52818e-07		0.582823	1.51003e-06
0.585717	2.88671e-05		0.585717	2.69905e-05		0.585717	2.04595e-06		0.585717	7.7509e-07		0.585717	9.51195e-07		0.585717	1.50407e-06
0.588611	2.67196e-05		0.588611	2.51299e-05		0.588611	2.06682e-06		0.588611	7.77068e-07		0.588611	9.49722e-07		0.588611	1.4981e-06
0.591505	2.47836e-05		0.591505	2.34046e-05		0.591505	2.08764e-06		0.591505	7.79245e-07		0.591505	9.48329e-07		0.591505	1.49201e-06
0.594399	2.29927e-05		0.594399	2.1806e-05		0.594399	2.10829e-06		0.594399	7.8161e-07		0.594399	9.46934e-07		0.594399	1.48584e-06
0.597293	2.13163e-05		0.597293	2.03278e-05		0.597293	2.1286e-06		0.597293	7.84126e-07		0.597293	9.45502e-07		0.597293	1.47967e-06
0.600186	1.97814e-05		0.600186	1.89593e-05		0.600186	2.14841e-06		0.600186	7.86769e-07		0.600186	9.44023e-07		0.600186	1.47351e-06
0.60308	1.83809e-05		0.60308	1.76718e-05		0.60308	2.16753e-06		0.60308	7.89515e-07		0.60308	9.42483e-07		0.60308	1.46736e-06
0.605974	1.71066e-05		0.605974	1.64666e-05		0.605974	2.18574e-06		0.605974	7.92347e-07		0.605974	9.40863e-07		0.605974	1.46114e-06
0.608868	1.59513e-05		0.608868	1.5361e-05		0.608868	2.20281e-06		0.608868	7.95247e-07		0.608868	9.39263e-07		0.608868	1.45484e-06
0.611762	1.48817e-05		0.611762	1.43467e-05		0.611762	2.21854e-06		0.611762	7.98202e-07		0.611762	9.37797e-07		0.611762	1.4484e-06
0.614656	1.38783e-05		0.614656	1.34145e-05		0.614656	2.23314e-06		0.614656	8.01194e-07		0.614656	9.36469e-07		0.614656	1.44206e-06
0.61755	1.2947e-05		0.61755	1.25581e-05		0.61755	2.24775e-06		0.61755	8.04135e-07		0.61755	9.35266e-07		0.61755	1.43606e-06
0.620444	1.2081e-05		0.620444	1.17749e-05		0.620444	2.26312e-06		0.620444	8.06921e-07		0.620444	9.34168e-07		0.620444	1.4304e-06
0.623338	1.12759e-05		0.623338	1.10479e-05		0.623338	2.2792e-06		0.623338	8.09516e-07		0.623338	9.33157e-07		0.623338	1.42505e-06
0.626231	1.05293e-05		0.626231	1.03687e-05		0.626231	2.29593e-06		0.626231	8.11903e-07		0.626231	9.32212e-07		0.626231	1.41994e-06
0.629125	9.84009e-06		0.629125	9.74333e-06		0.629125	2.31326e-06		0.629125	8.14061e-07		0.629125	9.31303e-07		0.629125	1.41505e-06
0.632019	9.20269e-06		0.632019	9.16668e-06		0.632019	2.33118e-06		0.632019	8.15961e-07		0.632019	9.30533e-07		0.632019	1.4104e-06
0.634913	8.61091e-06		0.634913	8.63398e-06		0.634913	2.34965e-06		0.634913	8.17784e-07		0.634913	9.30031e-07		0.634913	1.40601e-06
0.637807	8.06628e-06		0.637807	8.14238e-06		0.637807	2.36867e-06		0.637807	8.19839e-07		0.637807	9.29819e-07		0.637807	1.40191e-06
0.640701	7.57196e-06		0.640701	7.69162e-06		0.640701	2.3882e-06		0.640701	8.22267e-07		0.640701	9.29947e-07		0.640701	1.39814e-06
0.643595	7.12814e-06		0.643595	7.28425e-06		0.643595	2.40818e-06		0.643595	8.25141e-07		0.643595	9.30493e-07		0.643595	1.39474e-06
0.643595	7.12814e-06		0.643595	7.28425e-06		0.643595	2.40818e-06		0.643595	8.25141e-07		0.643595	9.30493e-07		0.643595	1.39474e-06
0.646489	6.72556e-06		0.646489	6.91178e-06		0.646489	2.42832e-06		0.646489	8.28335e-07		0.646489	9.31275e-07		0.646489	1.3916e-06
0.649383	6.35357e-06		0.649383	6.5639e-06		0.649383	2.44848e-06		0.649383	8.31704e-07		0.649383	9.32066e-07		0.649383	1.38858e-06
0.652277	6.00688e-06		0.652277	6.2407e-06		0.652277	2.46868e-06		0.652277	8.35228e-07		0.652277	9.32833e-07		0.652277	1.38569e-06
0.65517	5.68144e-06		0.65517	5.93871e-06		0.65517	2.4888e-06		0.65517	8.38859e-07		0.65517	9.33591e-07		0.65517	1.38293e-06
0.658064	5.37513e-06		0.658064	5.65491e-06		0.658064	2.50878e-06		0.658064	8.4255e-07		0.658064	9.34372e-07		0.658064	1.38031e-06
0.660958	5.0867e-06		0.660958	5.38925e-06		0.660958	2.5285e-06		0.660958	8.46261e-07		0.660958	9.35152e-07		0.660958	1.37782e-06
0.663852	4.81392e-06		0.663852	5.13899e-06		0.663852	2.54791e-06		0.663852	8.49961e-07		0.663852	9.35907e-07		0.663852	1.37543e-06
0.666746	4.55402e-06		0.666746	4.90212e-06		0.666746	2.56685e-06		0.666746	8.53609e-07		0.666746	9.36605e-07		0.666746	1.37311e-06
0.66964	4.30913e-06		0.66964	4.67953e-06		0.66964	2.58517e-06		0.66964	8.57173e-07		0.66964	9.3722e-07		0.66964	1.37084e-06
0.672534	4.08028e-06		0.672534	4.47085e-06		0.672534	2.60266e-06		0.672534	8.60624e-07		0.672534	9.37726e-07		0.672534	1.36859e-06
0.675428	3.86657e-06		0.675428	4.27596e-06		0.675428	2.6191e-06		0.675428	8.6393e-07		0.675428	9.38095e-07		0.675428	1.36635e-06
0.678322	3.66723e-06		0.678322	4.09646e-06		0.678322	2.6342e-06		0.678322	8.67057e-07		0.678322	9.38285e-07		0.678322	1.36409e-06
0.681215	3.48196e-06		0.681215	3.93277e-06		0.681215	2.64772e-06		0.681215	8.69965e-07		0.681215	9.38368e-07		0.681215	1.36178e-06
0.684109	3.31016e-06		0.684109	3.78163e-06		0.684109	2.66013e-06		0.684109	8.72606e-07		0.684109	9.38429e-07		0.684109	1.35939e-06
0.687003	3.15104e-06		0.687003	3.63778e-06		0.687003	2.67273e-06		0.687003	8.74924e-07		0.687003	9.38451e-07		0.687003	1.35689e-06
0.689897	3.00377e-06		0.689897	3.49962e-06		0.689897	2.68615e-06		0.689897	8.76861e-07		0.689897	9.38415e-07		0.689897	1.35425e-06
0.692791	2.8674e-06		0.692791	3.36883e-06		0.692791	2.70022e-06		0.692791	8.7844e-07		0.692791	9.38301e-07		0.692791	1.35141e-06
0.695685	2.74037e-06		0.695685	3.24655e-06		0.695685	2.7148e-06		0.695685	8.79922e-07		0.695685	9.38073e-07		0.695685	1.34831e-06
0.698579	2.6216e-06		0.698579	3.13069e-06		0.698579	2.72974e-06		0.698579	8.815e-07		0.698579	9.37688e-07		0.698579	1.34503e-06
0.701473	2.51035e-06		0.701473	3.01937e-06		0.701473	2.74486e-06		0.701473	8.83127e-07		0.701473	9.37097e-07		0.701473	1.34164e-06
0.704367	2.40642e-06		0.704367	2.91409e-06		0.704367	2.75991e-06		0.704367	8.84745e-07		0.704367	9.36249e-07		0.704367	1.33807e-06
0.70726	2.30639e-06		0.70726	2.8168e-06		0.70726	2.77457e-06		0.70726	8.86279e-07		0.70726	9.35195e-07		0.70726	1.33419e-06
0.710154	2.21012e-06		0.710154	2.72876e-06		0.710154	2.78839e-06		0.710154	8.87627e-07		0.710154	9.33978e-07		0.710154	1.32983e-06
0.713048	2.12436e-06		0.713048	2.65056e-06		0.713048	2.80069e-06		0.713048	8.88639e-07		0.713048	9.32493e-07		0.713048	1.32472e-06
0.715942	2.05573e-06		0.715942	2.58293e-06		0.715942	2.8103e-06		0.715942	8.89044e-07		0.715942	9.30533e-07		0.715942	1.31846e-06
0.715942	2.05573e-06		0.715942	2.58293e-06		0.715942	2.8103e-06		0.715942	8.89044e-07		0.715942	9.30533e-07		0.715942	1.31846e-06
0.718836	1.99674e-06		0.718836	2.52193e-06		0.718836	2.81837e-06		0.718836	8.89098e-07		0.718836	9.28318e-07		0.718836	1.31154e-06
0.72173	1.9448e-06		0.72173	2.46314e-06		0.72173	2.8266e-06		0.72173	8.89173e-07		0.72173	9.26154e-07		0.72173	1.3047e-06
0.724624	1.90019e-06		0.724624	2.40701e-06		0.724624	2.83481e-06		0.724624	8.89213e-07		0.724624	9.23989e-07		0.724624	1.29789e-06
0.727518	1.85562e-06		0.727518	2.35374e-06		0.727518	2.84304e-06		0.727518	8.89216e-07		0.727518	9.21827e-07		0.727518	1.29113e-06
0.730412	1.81235e-06		0.730412	2.30373e-06		0.730412	2.85128e-06		0.730412	8.89177e-07		0.730412	9.19678e-07		0.730412	1.28445e-06
0.733305	1.77097e-06		0.733305	2.25331e-06		0.733305	2.85953e-06		0.733305	8.89096e-07		0.733305	9.17502e-07		0.733305	1.27788e-06
0.736199	1.73195e-06		0.736199	2.20352e-06		0.736199	2.86776e-06		0.736199	8.88968e-07		0.736199	9.1525e-07		0.736199	1.27145e-06
0.739093	1.69558e-06		0.739093	2.16432e-06		0.739093	2.87591e-06		0.739093	8.88782e-07		0.739093	9.1291e-07		0.739093	1.2652e-06
0.741987	1.66209e-06		0.741987	2.13607e-06		0.741987	2.88393e-06		0.741987	8.88529e-07		0.741987	9.10465e-07		0.741987	1.25897e-06
0.744881	1.63109e-06		0.744881	2.1096e-06		0.744881	2.89177e-06		0.744881	8.88192e-07		0.744881	9.07899e-07		0.744881	1.25253e-06
0.747775	1.60208e-06		0.747775	2.08461e-06		0.747775	2.89937e-06		0.747775	8.87754e-07		0.747775	9.05196e-07		0.747775	1.2458e-06
0.750669	1.5751e-06		0.750669	2.06269e-06		0.750669	2.90667e-06		0.750669	8.87192e-07		0.750669	9.02336e-07		0.750669	1.23876e-06
0.753563	1.55028e-06		0.753563	2.0409e-06		0.753563	2.91362e-06		0.753563	8.86474e-07		0.753563	8.99298e-07		0.753563	1.23139e-06
0.756457	1.52774e-06		0.756457	2.01969e-06		0.756457	2.92004e-06		0.756457	8.8549e-07		0.756457	8.96031e-07		0.756457	1.22367e-06
0.75935	1.50753e-06		0.75935	1.99955e-06		0.75935	2.92555e-06		0.75935	8.84129e-07		0.75935	8.92459e-07		0.75935	1.2156e-06
0.762244	1.4896e-06		0.762244	1.98082e-06		0.762244	2.9298e-06		0.762244	8.8235e-07		0.762244	8.88528e-07		0.762244	1.20713e-06
0.765138	1.47348e-06		0.765138	1.96361e-06		0.765138	2.93249e-06		0.765138	8.80113e-07		0.765138	8.84204e-07		0.765138	1.19827e-06
0.768032	1.45878e-06		0.768032	1.94791e-06		0.768032	2.93339e-06		0.768032	8.77376e-07		0.768032	8.79455e-07		0.768032	1.189e-06
0.770926	1.44551e-06		0.770926	1.93361e-06		0.770926	2.93228e-06		0.770926	8.74095e-07		0.770926	8.7425e-07		0.770926	1.17931e-06
0.77382	1.43371e-06		0.77382	1.92062e-06		0.77382	2.92894e-06		0.77382	8.70219e-07		0.77382	8.68555e-07		0.77382	1.16918e-06
0.776714	1.42332e-06		0.776714	1.90878e-06		0.776714	2.92308e-06		0.776714	8.65708e-07		0.776714	8.6233e-07		0.776714	1.15859e-06
0.779608	1.4143e-06		0.779608	1.89798e-06		0.779608	2.91437e-06		0.779608	8.6057e-07		0.779608	8.55474e-07		0.779608	1.14745e-06
0.782502	1.40662e-06		0.782502	1.88808e-06		0.782502	2.90252e-06		0.782502	8.54877e-07		0.782502	8.47896e-07		0.782502	1.13557e-06
0.785396	1.4e-06		0.785396	1.87892e-06		0.785396	2.88724e-06		0.785396	8.48571e-07		0.785396	8.39577e-07		0.785396	1.12282e-06
0.788289	1.39409e-06		0.788289	1.87045e-06		0.788289	2.86834e-06		0.788289	8.41461e-07		0.788289	8.30499e-07		0.788289	1.10925e-06
0.791183	1.38869e-06		0.791183	1.86258e-06		0.791183	2.8458e-06		0.791183	8.33445e-07		0.791183	8.20639e-07		0.791183	1.09492e-06
0.794077	1.38359e-06		0.794077	1.85496e-06		0.794077	2.8198e-06		0.794077	8.24481e-07		0.794077	8.09964e-07		0.794077	1.07987e-06
0.796971	1.37852e-06		0.796971	1.84716e-06		0.796971	2.79059e-06		0.796971	8.14527e-07		0.796971	7.98377e-07		0.796971	1.06414e-06
0.799865	1.37314e-06		0.799865	1.83867e-06		0.799865	2.75727e-06		0.799865	8.03512e-07		0.799865	7.85758e-07		0.799865	1.04773e-06
0.799865	1.37314e-06		0.799865	1.83867e-06		0.799865	2.75727e-06		0.799865	8.03512e-07		0.799865	7.85758e-07		0.799865	1.04773e-06
0.802759	1.36681e-06		0.802759	1.8282e-06		0.802759	2.71875e-06		0.802759	7.91164e-07		0.802759	7.72153e-07		0.802759	1.03041e-06
0.805653	1.35904e-06		0.805653	1.81477e-06		0.805653	2.67525e-06		0.805653	7.77237e-07		0.805653	7.57679e-07		0.805653	1.01195e-06
0.808547	1.34962e-06		0.808547	1.79824e-06		0.808547	2.62697e-06		0.808547	7.61945e-07		0.808547	7.42404e-07		0.808547	9.92321e-07
0.811441	1.33834e-06		0.811441	1.77841e-06		0.811441	2.57448e-06		0.811441	7.45912e-07		0.811441	7.26318e-07		0.811441	9.71475e-07
0.814334	1.32498e-06		0.814334	1.75515e-06		0.814334	2.52196e-06		0.814334	7.30027e-07		0.814334	7.09425e-07		0.814334	9.49453e-07
0.817228	1.3094e-06		0.817228	1.72836e-06		0.817228	2.47009e-06		0.817228	7.14645e-07		0.817228	6.91801e-07		0.817228	9.26317e-07
0.820122	1.29151e-06		0.820122	1.69805e-06		0.820122	2.40653e-06		0.820122	6.98282e-07		0.820122	6.73465e-07		0.820122	9.02143e-07
0.823016	1.27132e-06		0.823016	1.66433e-06		0.823016	2.32613e-06		0.823016	6.78686e-07		0.823016	6.54373e-07		0.823016	8.77038e-07
0.82591	1.24891e-06		0.82591	1.6275e-06		0.82591	2.24186e-06		0.82591	6.56165e-07		0.82591	6.34554e-07		0.82591	8.50945e-07
0.828804	1.22446e-06		0.828804	1.58795e-06		0.828804	2.16589e-06		0.828804	6.32717e-07		0.828804	6.14188e-07		0.828804	8.23796e-07
0.831698	1.19811e-06		0.831698	1.54599e-06		0.831698	2.09296e-06		0.831698	6.0953e-07		0.831698	5.93341e-07		0.831698	7.95711e-07
0.834592	1.16962e-06		0.834592	1.50193e-06		0.834592	2.00036e-06		0.834592	5.86889e-07		0.834592	5.72133e-07		0.834592	7.66852e-07
0.837486	1.13889e-06		0.837486	1.45614e-06		0.837486	1.88834e-06		0.837486	5.6448e-07		0.837486	5.5091e-07		0.837486	7.37412e-07
0.840379	1.10653e-06		0.840379	1.409e-06		0.840379	1.79829e-06		0.840379	5.42066e-07		0.840379	5.29608e-07		0.840379	7.07616e-07
0.843273	1.07308e-06		0.843273	1.36093e-06		0.843273	1.73766e-06		0.843273	5.19474e-07		0.843273	5.08047e-07		0.843273	6.77511e-07
0.846167	1.03881e-06		0.846167	1.31232e-06		0.846167	1.67192e-06		0.846167	4.96265e-07		0.846167	4.86455e-07		0.846167	6.47162e-07
0.849061	1.00399e-06		0.849061	1.26355e-06		0.849061	1.59398e-06		0.849061	4.72534e-07		0.849061	4.64942e-07		0.849061	6.1687e-07
0.851955	9.68843e-07		0.851955	1.21497e-06		0.851955	1.5224e-06		0.851955	4.49192e-07		0.851955	4.43567e-07		0.851955	5.86969e-07
0.854849	9.3359e-07		0.854849	1.16686e-06		0.854849	1.46462e-06		0.854849	4.26892e-07		0.854849	4.22451e-07		0.854849	5.57765e-07
0.857743	8.98401e-07		0.857743	1.11948e-06		0.857743	1.40602e-06		0.857743	4.05941e-07		0.857743	4.01559e-07		0.857743	5.29477e-07
0.860637	8.63428e-07		0.860637	1.07234e-06		0.860637	1.33759e-06		0.860637	3.87026e-07		0.860637	3.81071e-07		0.860637	5.02342e-07
0.863531	8.28805e-07		0.863531	1.02523e-06		0.863531	1.26802e-06		0.863531	3.7007e-07		0.863531	3.61495e-07		0.863531	4.76748e-07
0.866424	7.94733e-07		0.866424	9.7909e-07		0.866424	1.20608e-06		0.866424	3.52574e-07		0.866424	3.4406e-07		0.866424	4.53355e-07
0.869318	7.6179e-07		0.869318	9.35129e-07		0.869318	1.1541e-06		0.869318	3.29542e-07		0.869318	3.31404e-07		0.869318	4.32423e-07
0.872212	7.32228e-07		0.872212	8.95954e-07		0.872212	1.11028e-06		0.872212	3.02955e-07		0.872212	3.22939e-07		0.872212	4.1315e-07
0.875106	7.15688e-07		0.875106	8.687e-07		0.875106	1.07339e-06		0.875106	2.99052e-07		0.875106	3.06089e-07		0.875106	4.02517e-07
0.878	7.12661e-07		0.878	8.59392e-07		0.878	1.05698e-06		0.878	3.0812e-07		0.878	2.9305e-07		0.878	4.01336e-07

## Sheet: Radiation heat flux
SN 0			SN 0.2			SN 0.4			SN 0.6			SN 0.8			SN 1
Axial distance	Radiation heat flux W/m2		Axial distance	Radiation heat flux W/m2		Axial distance	Radiation heat flux W/m2		Axial distance	Radiation heat flux W/m2		Axial distance	Radiation heat flux W/m2		Axial distance	Radiation heat flux W/m2
0.00115113	9203.61		0.00115113	9521.92		0.00115113	18065		0.00115113	24313.8		0.00115113	29180.3		0.00115113	34836.3
0.00404502	9236.89		0.00404502	9561.18		0.00404502	18140		0.00404502	24327.9		0.00404502	29510.1		0.00404502	35153.3
0.00693891	9272.97		0.00693891	9605.82		0.00693891	18231.6		0.00693891	24350.6		0.00693891	29828.4		0.00693891	35392.8
0.0098328	9328.72		0.0098328	9669.68		0.0098328	18366.7		0.0098328	24419.7		0.0098328	30146.6		0.0098328	35603.8
0.0127267	9414.2		0.0127267	9757.53		0.0127267	18560.6		0.0127267	24578.8		0.0127267	30480.5		0.0127267	35825.4
0.0156206	9522.74		0.0156206	9865.65		0.0156206	18801.7		0.0156206	24831.2		0.0156206	30815.8		0.0156206	36044.7
0.0185145	9642.26		0.0185145	9981.89		0.0185145	19076.1		0.0185145	25160.6		0.0185145	31143.4		0.0185145	36287.8
0.0214084	9766		0.0214084	10098.6		0.0214084	19381.9		0.0214084	25561.7		0.0214084	31473.5		0.0214084	36603.8
0.0243023	9887.92		0.0243023	10209.6		0.0243023	19710.6		0.0243023	26013.1		0.0243023	31800.1		0.0243023	37008.7
0.0271961	10002.1		0.0271961	10309		0.0271961	20049.5		0.0271961	26482.7		0.0271961	32090.8		0.0271961	37499
0.03009	10103.4		0.03009	10395.5		0.03009	20386.8		0.03009	26940		0.03009	32328		0.03009	38056.9
0.0329839	10190.4		0.0329839	10471.6		0.0329839	20711.1		0.0329839	27359.6		0.0329839	32547.2		0.0329839	38651.3
0.0358778	10265.8		0.0358778	10541.3		0.0358778	21014.4		0.0358778	27722.8		0.0358778	32797.1		0.0358778	39242.5
0.0387717	10333.6		0.0387717	10608.2		0.0387717	21294.4		0.0387717	28018.7		0.0387717	33108.6		0.0387717	39788.3
0.0416656	10395.4		0.0416656	10675.5		0.0416656	21553		0.0416656	28245.5		0.0416656	33492.2		0.0416656	40254.4
0.0445595	10452.7		0.0445595	10744.3		0.0445595	21792.7		0.0445595	28415.2		0.0445595	33933.6		0.0445595	40626.3
0.0474534	10506.2		0.0474534	10814		0.0474534	22013.8		0.0474534	28550.4		0.0474534	34396.4		0.0474534	40915.6
0.0503473	10557.3		0.0503473	10883.8		0.0503473	22217.1		0.0503473	28660.4		0.0503473	34833.9		0.0503473	41150.8
0.0532412	10607.7		0.0532412	10954.5		0.0532412	22405.8		0.0532412	28764.9		0.0532412	35205.8		0.0532412	41316.8
0.056135	10659.4		0.056135	11026.5		0.056135	22583.6		0.056135	28916.7		0.056135	35497.9		0.056135	41394.3
0.0590289	10714.3		0.0590289	11099.2		0.0590289	22751.9		0.0590289	29158.1		0.0590289	35728.4		0.0590289	41459.1
0.0619228	10772.9		0.0619228	11171.9		0.0619228	22911.4		0.0619228	29499.4		0.0619228	35917.9		0.0619228	41571.9
0.0648167	10835.2		0.0648167	11244.2		0.0648167	23061.8		0.0648167	29925.6		0.0648167	36051.3		0.0648167	41723.9
0.0677106	10901.4		0.0677106	11316		0.0677106	23203.6		0.0677106	30398.5		0.0677106	36185.5		0.0677106	41905
0.0706045	10972.1		0.0706045	11387.4		0.0706045	23339.7		0.0706045	30867.8		0.0706045	36398		0.0706045	42108
0.0734984	11046.3		0.0734984	11458.9		0.0734984	23475.7		0.0734984	31295.4		0.0734984	36681.2		0.0734984	42323.8
0.0763923	11122.8		0.0763923	11530.9		0.0763923	23617.6		0.0763923	31680.1		0.0763923	37018.9		0.0763923	42526.9
0.0792862	11201.6		0.0792862	11603.8		0.0792862	23772.4		0.0792862	32059.3		0.0792862	37382.6		0.0792862	42717
0.0821801	11282.9		0.0821801	11677.5		0.0821801	23947.4		0.0821801	32476.5		0.0821801	37720.2		0.0821801	42929.3
0.085074	11366.9		0.085074	11751.9		0.085074	24149.4		0.085074	32942.5		0.085074	38045.5		0.085074	43180.7
0.085074	11366.9		0.085074	11751.9		0.085074	24149.4		0.085074	32942.5		0.085074	38045.5		0.085074	43180.7
0.0879678	11453.2		0.0879678	11827.1		0.0879678	24383.7		0.0879678	33507.6		0.0879678	38427.4		0.0879678	43474.5
0.0908617	11540.8		0.0908617	11903.2		0.0908617	24652.6		0.0908617	34153.6		0.0908617	38886.6		0.0908617	43816.7
0.0937556	11628.4		0.0937556	11980.6		0.0937556	24953.7		0.0937556	34663.1		0.0937556	39371.8		0.0937556	44212.7
0.0966495	11715.1		0.0966495	12059.5		0.0966495	25281		0.0966495	34893.5		0.0966495	39783.3		0.0966495	44670.7
0.0995434	11800.3		0.0995434	12140.3		0.0995434	25624.9		0.0995434	34952.2		0.0995434	40075.3		0.0995434	45194.5
0.102437	11883.7		0.102437	12223		0.102437	25975.3		0.102437	34950.4		0.102437	40278.9		0.102437	45771.5
0.105331	11964.8		0.105331	12307.6		0.105331	26323		0.105331	34904.5		0.105331	40403.6		0.105331	46351.5
0.108225	12043.8		0.108225	12393.5		0.108225	26661.2		0.108225	34840.5		0.108225	40427.4		0.108225	46845.2
0.111119	12120.5		0.111119	12480.1		0.111119	26993.8		0.111119	34776.5		0.111119	40383.9		0.111119	47185.4
0.114013	12195		0.114013	12566.7		0.114013	27338.9		0.114013	34701		0.114013	40338.3		0.114013	47382.9
0.116907	12267.3		0.116907	12652.5		0.116907	27729.6		0.116907	34609.9		0.116907	40310.1		0.116907	47462.9
0.119801	12337.2		0.119801	12736.9		0.119801	28197.6		0.119801	34532.6		0.119801	40287.6		0.119801	47430.9
0.122695	12404.7		0.122695	12819.5		0.122695	28741.5		0.122695	34485.4		0.122695	40262.3		0.122695	47341.7
0.125588	12470.1		0.125588	12899.8		0.125588	29344.8		0.125588	34458.4		0.125588	40232.3		0.125588	47253.9
0.128482	12533.2		0.128482	12977.7		0.128482	30017.4		0.128482	34442.6		0.128482	40198.7		0.128482	47178.5
0.131376	12594.1		0.131376	13053.1		0.131376	30752.3		0.131376	34431.8		0.131376	40162.6		0.131376	47112.7
0.13427	12653		0.13427	13126.3		0.13427	31487.7		0.13427	34420.9		0.13427	40124.6		0.13427	47051.5
0.137164	12710		0.137164	13197.4		0.137164	32148.1		0.137164	34407.5		0.137164	40084		0.137164	46991.8
0.140058	12765.4		0.140058	13266.6		0.140058	32691.9		0.140058	34387.9		0.140058	40037.7		0.140058	46931.1
0.142952	12819.1		0.142952	13334		0.142952	33048.4		0.142952	34359.9		0.142952	39989		0.142952	46869
0.145846	12871.2		0.145846	13399.8		0.145846	33218.5		0.145846	34321.5		0.145846	39939.1		0.145846	46802.5
0.14874	12921.8		0.14874	13464.2		0.14874	33262.9		0.14874	34274.3		0.14874	39887.3		0.14874	46731
0.151633	12971.1		0.151633	13527.3		0.151633	33177		0.151633	34220.6		0.151633	39838.1		0.151633	46657.2
0.154527	13019.1		0.154527	13589.5		0.154527	33006.6		0.154527	34162		0.154527	39791.8		0.154527	46579
0.157421	13065.8		0.157421	13651.2		0.157421	32801.1		0.157421	34103.3		0.157421	39746.9		0.157421	46500.6
0.160315	13111.3		0.160315	13712.4		0.160315	32566.6		0.160315	34048.3		0.160315	39701.9		0.160315	46425.5
0.163209	13155.9		0.163209	13773.6		0.163209	32314.3		0.163209	33997.9		0.163209	39656.3		0.163209	46351.4
0.166103	13199.6		0.166103	13834.9		0.166103	32053.5		0.166103	33952.4		0.166103	39609.8		0.166103	46276.4
0.166103	13199.6		0.166103	13834.9		0.166103	32053.5		0.166103	33952.4		0.166103	39609.8		0.166103	46276.4
0.168997	13242.9		0.168997	13896.9		0.168997	31784		0.168997	33911.5		0.168997	39562.4		0.168997	46198.8
0.171891	13285.9		0.171891	13959.8		0.171891	31521.6		0.171891	33873.3		0.171891	39514.4		0.171891	46118
0.174785	13328.7		0.174785	14023.9		0.174785	31289.3		0.174785	33837.5		0.174785	39466		0.174785	46034
0.177678	13371.6		0.177678	14089.2		0.177678	31094.9		0.177678	33804.4		0.177678	39417.6		0.177678	45947
0.180572	13414.6		0.180572	14155.8		0.180572	30936.4		0.180572	33773.7		0.180572	39369.5		0.180572	45857.7
0.183466	13458		0.183466	14224		0.183466	30805.3		0.183466	33745.4		0.183466	39321.9		0.183466	45766.5
0.18636	13501.8		0.18636	14293.9		0.18636	30691.7		0.18636	33719.2		0.18636	39274.7		0.18636	45674
0.189254	13545.9		0.189254	14365.3		0.189254	30590.7		0.189254	33695		0.189254	39228.1		0.189254	45580.7
0.192148	13590.4		0.192148	14438.2		0.192148	30502.2		0.192148	33672.7		0.192148	39181.9		0.192148	45487.4
0.195042	13635.7		0.195042	14512.6		0.195042	30425.2		0.195042	33652.4		0.195042	39136.2		0.195042	45394.7
0.197936	13682		0.197936	14588.4		0.197936	30356.6		0.197936	33634		0.197936	39091		0.197936	45303.3
0.20083	13729.3		0.20083	14665.5		0.20083	30294.7		0.20083	33617.1		0.20083	39046.5		0.20083	45214.2
0.203723	13777.8		0.203723	14743.9		0.203723	30238.5		0.203723	33601.1		0.203723	39002.8		0.203723	45127.4
0.206617	13827.6		0.206617	14823.7		0.206617	30186.6		0.206617	33585.8		0.206617	38959		0.206617	45041.8
0.209511	13878.9		0.209511	14904.9		0.209511	30136.8		0.209511	33570.6		0.209511	38913.6		0.209511	44956.1
0.212405	13931.7		0.212405	14987.6		0.212405	30088.1		0.212405	33555.5		0.212405	38866.3		0.212405	44870
0.215299	13986		0.215299	15071.7		0.215299	30039.7		0.215299	33540.1		0.215299	38817.6		0.215299	44783.8
0.215299	13986		0.215299	15071.7		0.215299	30039.7		0.215299	33540.1		0.215299	38817.6		0.215299	44783.8
0.218193	14041.9		0.218193	15157.3		0.218193	29990.6		0.218193	33523.1		0.218193	38768.4		0.218193	44698.8
0.221087	14099.5		0.221087	15244.2		0.221087	29940.3		0.221087	33503.4		0.221087	38719.6		0.221087	44615.7
0.223981	14159.1		0.223981	15332.9		0.223981	29889		0.223981	33481		0.223981	38671		0.223981	44534.4
0.226875	14220.7		0.226875	15423.4		0.226875	29837.7		0.226875	33456.1		0.226875	38622.1		0.226875	44454.2
0.229768	14284.1		0.229768	15515.5		0.229768	29789.2		0.229768	33429.4		0.229768	38571.9		0.229768	44374.6
0.232662	14349.1		0.232662	15609.1		0.232662	29745.2		0.232662	33401.2		0.232662	38519.8		0.232662	44295.4
0.235556	14416.1		0.235556	15704.5		0.235556	29705.7		0.235556	33371.8		0.235556	38466.5		0.235556	44216.4
0.23845	14485.1		0.23845	15801.5		0.23845	29672.3		0.23845	33341.1		0.23845	38412.4		0.23845	44137.3
0.241344	14556.3		0.241344	15900.2		0.241344	29645.2		0.241344	33309.2		0.241344	38357.3		0.241344	44057.6
0.244238	14629.5		0.244238	16000.8		0.244238	29624.2		0.244238	33275.9		0.244238	38301		0.244238	43977.3
0.247132	14704.8		0.247132	16103.1		0.247132	29608.2		0.247132	33241.3		0.247132	38243.5		0.247132	43896
0.250026	14782.1		0.250026	16207.4		0.250026	29596.4		0.250026	33205.1		0.250026	38184.8		0.250026	43813.8
0.25292	14861.4		0.25292	16313.6		0.25292	29587.9		0.25292	33167.3		0.25292	38125		0.25292	43730.5
0.255814	14942.7		0.255814	16421.8		0.255814	29581.8		0.255814	33127.8		0.255814	38064.1		0.255814	43645.9
0.258707	15026.1		0.258707	16532		0.258707	29577.4		0.258707	33086.4		0.258707	38002.1		0.258707	43560.2
0.261601	15111.6		0.261601	16644.3		0.261601	29573.8		0.261601	33043.6		0.261601	37939.2		0.261601	43473.1
0.264495	15199		0.264495	16758.7		0.264495	29570.4		0.264495	33000.1		0.264495	37875.3		0.264495	43384.7
0.267389	15288.5		0.267389	16875.3		0.267389	29566.4		0.267389	32955.6		0.267389	37810.5		0.267389	43294.9
0.270283	15380.2		0.270283	16994.1		0.270283	29561.5		0.270283	32910		0.270283	37744.7		0.270283	43203.7
0.273177	15473.8		0.273177	17115.3		0.273177	29554.8		0.273177	32863.6		0.273177	37678		0.273177	43111.1
0.276071	15569.5		0.276071	17238.7		0.276071	29545.8		0.276071	32816.2		0.276071	37610.4		0.276071	43017.1
0.278965	15667.2		0.278965	17364.6		0.278965	29534.4		0.278965	32768.1		0.278965	37541.7		0.278965	42921.7
0.281859	15766.8		0.281859	17492.8		0.281859	29520.8		0.281859	32719.3		0.281859	37472.1		0.281859	42824.8
0.284752	15868.4		0.284752	17623.5		0.284752	29504.7		0.284752	32669.8		0.284752	37401.4		0.284752	42726.4
0.287646	15971.9		0.287646	17756.7		0.287646	29485.9		0.287646	32619.6		0.287646	37329.6		0.287646	42626.5
0.29054	16077.4		0.29054	17892.4		0.29054	29464.3		0.29054	32568.8		0.29054	37256.7		0.29054	42524.9
0.293434	16184.6		0.293434	18030.8		0.293434	29439.9		0.293434	32517.4		0.293434	37182.6		0.293434	42421.5
0.296328	16293.7		0.296328	18171.7		0.296328	29412.8		0.296328	32465.2		0.296328	37107.2		0.296328	42316.3
0.299222	16404.5		0.299222	18315.2		0.299222	29383.3		0.299222	32412.3		0.299222	37030.5		0.299222	42209.3
0.302116	16516.9		0.302116	18461.4		0.302116	29351.9		0.302116	32358.7		0.302116	36952.6		0.302116	42100.3
0.30501	16631		0.30501	18610.2		0.30501	29318.8		0.30501	32304.3		0.30501	36873.3		0.30501	41989.6
0.307904	16746.6		0.307904	18761.6		0.307904	29284.3		0.307904	32249		0.307904	36792.7		0.307904	41876.9
0.310797	16863.8		0.310797	18915.7		0.310797	29248.6		0.310797	32192.9		0.310797	36710.6		0.310797	41762.4
0.313691	16982.6		0.313691	19072.7		0.313691	29211.5		0.313691	32135.7		0.313691	36626.9		0.313691	41645.9
0.313691	16982.6		0.313691	19072.7		0.313691	29211.5		0.313691	32135.7		0.313691	36626.9		0.313691	41645.9
0.316585	17103.1		0.316585	19232.8		0.316585	29173.3		0.316585	32077.4		0.316585	36541.6		0.316585	41527.5
0.319479	17225.3		0.319479	19395.7		0.319479	29134		0.319479	32018		0.319479	36454.6		0.319479	41407.3
0.322373	17349.1		0.322373	19561.5		0.322373	29093.8		0.322373	31957.6		0.322373	36366.2		0.322373	41285.6
0.325267	17474.7		0.325267	19730.1		0.325267	29052.8		0.325267	31896		0.325267	36276.3		0.325267	41162.5
0.328161	17602.3		0.328161	19902		0.328161	29011		0.328161	31833.3		0.328161	36184.9		0.328161	41038
0.331055	17731.8		0.331055	20077.1		0.331055	28968		0.331055	31769.3		0.331055	36092.1		0.331055	40911.6
0.333949	17863.3		0.333949	20255.6		0.333949	28923.9		0.333949	31704		0.333949	35997.9		0.333949	40783.8
0.336842	17997		0.336842	20437.5		0.336842	28879.1		0.336842	31637.4		0.336842	35902.3		0.336842	40655
0.339736	18132.9		0.339736	20622.8		0.339736	28833.8		0.339736	31569.6		0.339736	35805.6		0.339736	40525.5
0.34263	18271.1		0.34263	20811.8		0.34263	28787.8		0.34263	31500.4		0.34263	35707.8		0.34263	40395.4
0.345524	18411.9		0.345524	21004.4		0.345524	28741.1		0.345524	31430.1		0.345524	35609		0.345524	40264.6
0.348418	18555.3		0.348418	21200.6		0.348418	28693.6		0.348418	31358.6		0.348418	35509.2		0.348418	40133.2
0.351312	18701.5		0.351312	21400.5		0.351312	28645.6		0.351312	31285.9		0.351312	35408.3		0.351312	40001.1
0.354206	18850.6		0.354206	21604		0.354206	28596.9		0.354206	31212.1		0.354206	35306.6		0.354206	39868.7
0.3571	19002.6		0.3571	21811		0.3571	28547.6		0.3571	31137.2		0.3571	35204.5		0.3571	39735.9
0.359994	19157.4		0.359994	22021.2		0.359994	28497.8		0.359994	31061.4		0.359994	35102		0.359994	39603
0.362887	19314.9		0.362887	22234.7		0.362887	28447.6		0.362887	30984.8		0.362887	34999.1		0.362887	39470.1
0.365781	19475.3		0.365781	22451.2		0.365781	28396.8		0.365781	30907.5		0.365781	34895.9		0.365781	39337.3
0.368675	19638.6		0.368675	22670.7		0.368675	28345.6		0.368675	30829.4		0.368675	34792.4		0.368675	39204.7
0.371569	19804.9		0.371569	22893.2		0.371569	28293.8		0.371569	30750.7		0.371569	34688.6		0.371569	39072.1
0.374463	19974.1		0.374463	23118.5		0.374463	28241.3		0.374463	30671.1		0.374463	34584.4		0.374463	38939.5
0.377357	20146.4		0.377357	23346.6		0.377357	28188.1		0.377357	30590.8		0.377357	34480.2		0.377357	38807
0.380251	20321.8		0.380251	23577.2		0.380251	28134.4		0.380251	30510		0.380251	34376.2		0.380251	38674.9
0.383145	20500.2		0.383145	23810		0.383145	28080.1		0.383145	30429.1		0.383145	34272.3		0.383145	38543
0.386039	20681.4		0.386039	24044.8		0.386039	28025.1		0.386039	30347.9		0.386039	34168.5		0.386039	38411.5
0.388932	20865.6		0.388932	24281.5		0.388932	27969.5		0.388932	30266.4		0.388932	34064.9		0.388932	38280.3
0.391826	21052.8		0.391826	24519.7		0.391826	27913.1		0.391826	30184.6		0.391826	33961.6		0.391826	38149.4
0.39472	21242.8		0.39472	24758.9		0.39472	27856		0.39472	30102.6		0.39472	33858.4		0.39472	38018.8
0.397614	21435.6		0.397614	24998.3		0.397614	27798.1		0.397614	30020.5		0.397614	33755.5		0.397614	37888.5
0.400508	21631.1		0.400508	25237.2		0.400508	27739.4		0.400508	29938.3		0.400508	33652.9		0.400508	37758.6
0.403402	21829.2		0.403402	25475		0.403402	27679.9		0.403402	29856.1		0.403402	33550.6		0.403402	37629
0.403402	21829.2		0.403402	25475		0.403402	27679.9		0.403402	29856.1		0.403402	33550.6		0.403402	37629
0.406296	22030		0.406296	25710.9		0.406296	27619.6		0.406296	29773.9		0.406296	33448.6		0.406296	37499.8
0.40919	22233.1		0.40919	25944		0.40919	27558.6		0.40919	29691.9		0.40919	33346.8		0.40919	37370.9
0.412084	22438.3		0.412084	26173.4		0.412084	27496.8		0.412084	29610		0.412084	33245.3		0.412084	37242.4
0.414977	22645.5		0.414977	26398.2		0.414977	27434.2		0.414977	29528.1		0.414977	33144		0.414977	37114.3
0.417871	22854		0.417871	26616.7		0.417871	27370.9		0.417871	29446.5		0.417871	33043		0.417871	36986.5
0.420765	23063.2		0.420765	26827.3		0.420765	27306.9		0.420765	29365		0.420765	32942.2		0.420765	36859.2
0.423659	23272.1		0.423659	27028.7		0.423659	27242.4		0.423659	29283.7		0.423659	32841.7		0.423659	36732.4
0.426553	23479.8		0.426553	27219.1		0.426553	27177.3		0.426553	29202.6		0.426553	32741.5		0.426553	36606
0.429447	23685.3		0.429447	27396		0.429447	27111.6		0.429447	29121.6		0.429447	32641.5		0.429447	36480.1
0.432341	23887.8		0.432341	27557.6		0.432341	27045.5		0.432341	29040.9		0.432341	32541.7		0.432341	36354.7
0.435235	24086.1		0.435235	27701.2		0.435235	26979.1		0.435235	28960.3		0.435235	32442.2		0.435235	36229.8
0.438129	24278.4		0.438129	27823.5		0.438129	26912.2		0.438129	28879.9		0.438129	32342.9		0.438129	36105.4
0.441023	24462.5		0.441023	27920.2		0.441023	26845.1		0.441023	28799.6		0.441023	32243.8		0.441023	35981.6
0.443916	24636.6		0.443916	27992.3		0.443916	26777.7		0.443916	28719.6		0.443916	32145.1		0.443916	35858.3
0.44681	24798.8		0.44681	28039.6		0.44681	26710		0.44681	28639.8		0.44681	32046.6		0.44681	35735.7
0.449704	24946		0.449704	28064.2		0.449704	26642.1		0.449704	28560.3		0.449704	31948.4		0.449704	35613.8
0.452598	25075.6		0.452598	28067.2		0.452598	26574.2		0.452598	28481		0.452598	31850.7		0.452598	35492.6
0.455492	25184.8		0.455492	28047.3		0.455492	26506.3		0.455492	28402		0.455492	31753.3		0.455492	35372.1
0.458386	25271.5		0.458386	28012.7		0.458386	26438.2		0.458386	28323.2		0.458386	31656.2		0.458386	35252.2
0.46128	25337		0.46128	27964.3		0.46128	26369.9		0.46128	28244.5		0.46128	31559.5		0.46128	35132.9
0.464174	25381.8		0.464174	27901.3		0.464174	26301.5		0.464174	28166		0.464174	31463.2		0.464174	35014.2
0.467068	25407.4		0.467068	27827.4		0.467068	26233.3		0.467068	28087.8		0.467068	31367.3		0.467068	34896.4
0.469961	25415.2		0.469961	27740.8		0.469961	26165.1		0.469961	28010		0.469961	31272.1		0.469961	34779.4
0.472855	25406.6		0.472855	27645.9		0.472855	26097.1		0.472855	27932.5		0.472855	31177.4		0.472855	34663.3
0.475749	25386.2		0.475749	27542.8		0.475749	26029.2		0.475749	27855.3		0.475749	31083.3		0.475749	34547.9
0.478643	25355.9		0.478643	27432.4		0.478643	25961.4		0.478643	27778.3		0.478643	30989.6		0.478643	34433.3
0.481537	25314.9		0.481537	27317.7		0.481537	25893.8		0.481537	27701.7		0.481537	30896.5		0.481537	34319.4
0.484431	25264.5		0.484431	27198.4		0.484431	25826.3		0.484431	27625.4		0.484431	30804.1		0.484431	34206.4
0.487325	25205.6		0.487325	27075.5		0.487325	25758.9		0.487325	27549.5		0.487325	30712.2		0.487325	34094.3
0.490219	25139.4		0.490219	26952.3		0.490219	25691.8		0.490219	27474		0.490219	30621		0.490219	33982.9
0.493113	25067.3		0.493113	26826.3		0.493113	25624.8		0.493113	27398.8		0.493113	30530.5		0.493113	33872.5
0.496006	24990.7		0.496006	26700.1		0.496006	25558		0.496006	27324.1		0.496006	30440.6		0.496006	33762.8
0.4989	24909.8		0.4989	26578.3		0.4989	25491.4		0.4989	27249.7		0.4989	30351.2		0.4989	33653.8
0.501794	24826.5		0.501794	26453.1		0.501794	25424.9		0.501794	27175.8		0.501794	30262.5		0.501794	33545.7
0.504688	24742.3		0.504688	26332.4		0.504688	25358.6		0.504688	27102.2		0.504688	30174.4		0.504688	33438.2
0.507582	24656.6		0.507582	26214.5		0.507582	25292.5		0.507582	27029.1		0.507582	30087		0.507582	33331.6
0.510476	24571.1		0.510476	26096.9		0.510476	25226.7		0.510476	26956.5		0.510476	30000.2		0.510476	33225.7
0.51337	24486.4		0.51337	25985.4		0.51337	25161.1		0.51337	26884.4		0.51337	29914.1		0.51337	33120.6
0.516264	24401.8		0.516264	25874.8		0.516264	25095.5		0.516264	26812.7		0.516264	29828.5		0.516264	33016
0.519158	24318.7		0.519158	25767.3		0.519158	25030		0.519158	26741.2		0.519158	29743.2		0.519158	32911.9
0.522051	24237.2		0.522051	25664.6		0.522051	24964.6		0.522051	26670.1		0.522051	29658.4		0.522051	32808.2
0.524945	24157.3		0.524945	25563.4		0.524945	24899.3		0.524945	26599.4		0.524945	29574.2		0.524945	32705.1
0.524945	24157.3		0.524945	25563.4		0.524945	24899.3		0.524945	26599.4		0.524945	29574.2		0.524945	32705.1
0.527839	24079.5		0.527839	25467.5		0.527839	24834.1		0.527839	26529.2		0.527839	29490.4		0.527839	32602.5
0.530733	24003.9		0.530733	25374.4		0.530733	24769.1		0.530733	26459.2		0.530733	29407		0.530733	32500.3
0.533627	23930.7		0.533627	25283.4		0.533627	24704.1		0.533627	26389.6		0.533627	29323.9		0.533627	32398.5
0.536521	23859.9		0.536521	25197.9		0.536521	24639.1		0.536521	26320.3		0.536521	29241.1		0.536521	32297
0.539415	23792.1		0.539415	25114.4		0.539415	24574.2		0.539415	26251.3		0.539415	29158.6		0.539415	32195.8
0.542309	23726.5		0.542309	25034		0.542309	24509.4		0.542309	26182.5		0.542309	29076.4		0.542309	32094.9
0.545203	23663.7		0.545203	24957.4		0.545203	24444.6		0.545203	26114		0.545203	28994.3		0.545203	31994.2
0.548096	23603.6		0.548096	24883.4		0.548096	24379.8		0.548096	26045.6		0.548096	28912.5		0.548096	31893.8
0.55099	23546.1		0.55099	24812		0.55099	24315.1		0.55099	25977.5		0.55099	28830.8		0.55099	31793.6
0.553884	23490.9		0.553884	24744.2		0.553884	24250.4		0.553884	25909.4		0.553884	28749.1		0.553884	31693.5
0.556778	23438.4		0.556778	24678.6		0.556778	24185.7		0.556778	25841.5		0.556778	28667.6		0.556778	31593.6
0.559672	23388.4		0.559672	24614.8		0.559672	24121.1		0.559672	25773.7		0.559672	28586.1		0.559672	31493.8
0.562566	23340.9		0.562566	24554.5		0.562566	24056.4		0.562566	25705.9		0.562566	28504.7		0.562566	31394.1
0.56546	23295.7		0.56546	24496		0.56546	23991.8		0.56546	25638.2		0.56546	28423.3		0.56546	31294.5
0.568354	23253		0.568354	24439.7		0.568354	23927.2		0.568354	25570.6		0.568354	28341.9		0.568354	31195
0.571248	23212.1		0.571248	24385.4		0.571248	23862.6		0.571248	25502.9		0.571248	28260.5		0.571248	31095.5
0.574142	23173.2		0.574142	24332.9		0.574142	23798		0.574142	25435.3		0.574142	28179		0.574142	30996.2
0.577035	23136.1		0.577035	24282.3		0.577035	23733.4		0.577035	25367.6		0.577035	28097.6		0.577035	30896.8
0.579929	23100.7		0.579929	24233.4		0.579929	23668.8		0.579929	25299.9		0.579929	28016.1		0.579929	30797.6
0.582823	23067		0.582823	24186.1		0.582823	23604.3		0.582823	25232.2		0.582823	27934.6		0.582823	30698.3
0.585717	23034.7		0.585717	24140.2		0.585717	23539.7		0.585717	25164.4		0.585717	27853		0.585717	30599.1
0.588611	23003.7		0.588611	24095.5		0.588611	23475.2		0.588611	25096.7		0.588611	27771.4		0.588611	30500
0.591505	22973.8		0.591505	24052.2		0.591505	23410.8		0.591505	25028.9		0.591505	27689.8		0.591505	30401
0.594399	22945.5		0.594399	24010		0.594399	23346.6		0.594399	24961.2		0.594399	27608.3		0.594399	30302.1
0.597293	22918.3		0.597293	23968.9		0.597293	23282.5		0.597293	24893.5		0.597293	27526.8		0.597293	30203.3
0.600186	22892.3		0.600186	23928.9		0.600186	23218.6		0.600186	24826		0.600186	27445.4		0.600186	30104.7
0.60308	22867.6		0.60308	23889.9		0.60308	23154.9		0.60308	24758.4		0.60308	27364.1		0.60308	30006.2
0.605974	22843.7		0.605974	23851.8		0.605974	23091.4		0.605974	24691		0.605974	27282.8		0.605974	29907.9
0.608868	22821		0.608868	23814.7		0.608868	23028.2		0.608868	24623.7		0.608868	27201.7		0.608868	29809.7
0.611762	22799.2		0.611762	23778.9		0.611762	22965.5		0.611762	24556.7		0.611762	27120.9		0.611762	29711.8
0.614656	22778.7		0.614656	23744.1		0.614656	22903.2		0.614656	24490.1		0.614656	27040.4		0.614656	29614.4
0.61755	22759.3		0.61755	23710.3		0.61755	22841.5		0.61755	24423.8		0.61755	26960.3		0.61755	29517.4
0.620444	22741		0.620444	23677.9		0.620444	22780.3		0.620444	24357.9		0.620444	26880.6		0.620444	29420.8
0.623338	22724		0.623338	23646.5		0.623338	22719.8		0.623338	24292.5		0.623338	26801.2		0.623338	29324.7
0.626231	22708.2		0.626231	23616.5		0.626231	22659.9		0.626231	24227.5		0.626231	26722.4		0.626231	29229.1
0.629125	22693.7		0.629125	23587.8		0.629125	22600.9		0.629125	24163.2		0.629125	26644.2		0.629125	29134
0.632019	22680.5		0.632019	23560.7		0.632019	22542.9		0.632019	24099.7		0.632019	26566.7		0.632019	29039.8
0.634913	22668.8		0.634913	23534.9		0.634913	22485.9		0.634913	24037		0.634913	26490		0.634913	28946.3
0.637807	22658.7		0.637807	23510.7		0.637807	22430.2		0.637807	23975.4		0.637807	26414.4		0.637807	28853.9
0.640701	22650.4		0.640701	23488.1		0.640701	22375.9		0.640701	23915.1		0.640701	26340		0.640701	28762.8
0.643595	22644.2		0.643595	23467.5		0.643595	22323.3		0.643595	23856.2		0.643595	26267		0.643595	28673
0.643595	22644.2		0.643595	23467.5		0.643595	22323.3		0.643595	23856.2		0.643595	26267		0.643595	28673
0.646489	22640.1		0.646489	23449		0.646489	22272.5		0.646489	23798.9		0.646489	26195.6		0.646489	28584.9
0.649383	22638.4		0.649383	23432.9		0.649383	22223.6		0.649383	23743.3		0.649383	26126		0.649383	28498.6
0.652277	22639.1		0.652277	23419.4		0.652277	22176.7		0.652277	23689.7		0.652277	26058.4		0.652277	28414.2
0.65517	22642.4		0.65517	23408.5		0.65517	22132.2		0.65517	23638.2		0.65517	25993		0.65517	28332
0.658064	22648.3		0.658064	23400.2		0.658064	22089.7		0.658064	23588.8		0.658064	25929.6		0.658064	28252.1
0.660958	22656.4		0.660958	23394.5		0.660958	22049.6		0.660958	23541.3		0.660958	25868.5		0.660958	28174.3
0.663852	22667.2		0.663852	23391.1		0.663852	22011.3		0.663852	23496		0.663852	25809.4		0.663852	28098.8
0.666746	22680.3		0.666746	23390.5		0.666746	21975.2		0.666746	23452.6		0.666746	25752.7		0.666746	28025.5
0.66964	22696.2		0.66964	23392.5		0.66964	21941.1		0.66964	23411.3		0.66964	25698.1		0.66964	27954.8
0.672534	22714.4		0.672534	23397		0.672534	21908.8		0.672534	23372.1		0.672534	25645.8		0.672534	27886.3
0.675428	22734.5		0.675428	23403.9		0.675428	21878.5		0.675428	23334.6		0.675428	25595.7		0.675428	27820.1
0.678322	22756.8		0.678322	23412.8		0.678322	21851.9		0.678322	23299.2		0.678322	25547.4		0.678322	27756.4
0.681215	22780.5		0.681215	23424		0.681215	21827.1		0.681215	23267.7		0.681215	25501.4		0.681215	27694.6
0.684109	22806.2		0.684109	23436.8		0.684109	21805.1		0.684109	23237.8		0.684109	25459.6		0.684109	27635.6
0.687003	22833.8		0.687003	23451.9		0.687003	21785		0.687003	23211		0.687003	25419.7		0.687003	27581.5
0.689897	22865.2		0.689897	23471		0.689897	21767.6		0.689897	23185.9		0.689897	25383.2		0.689897	27529.3
0.692791	22897		0.692791	23491		0.692791	21752		0.692791	23163.8		0.692791	25348.7		0.692791	27481.1
0.695685	22931.7		0.695685	23513.5		0.695685	21739		0.695685	23143.5		0.695685	25317.5		0.695685	27435.2
0.698579	22966.9		0.698579	23537		0.698579	21727.6		0.698579	23125.8		0.698579	25288.3		0.698579	27393.2
0.701473	23003.8		0.701473	23562.5		0.701473	21718.6		0.701473	23109.8		0.701473	25262.1		0.701473	27353.7
0.704367	23041.3		0.704367	23588.7		0.704367	21711		0.704367	23096		0.704367	25237.8		0.704367	27317.7
0.70726	23079.4		0.70726	23615.7		0.70726	21705.1		0.70726	23083.6		0.70726	25216.1		0.70726	27284.1
0.710154	23117.9		0.710154	23643.3		0.710154	21700.2		0.710154	23072.9		0.710154	25195.9		0.710154	27253.6
0.713048	23155.7		0.713048	23670.4		0.713048	21696.4		0.713048	23063		0.713048	25177.7		0.713048	27224.9
0.715942	23193.4		0.715942	23697.5		0.715942	21692.9		0.715942	23053.8		0.715942	25160.4		0.715942	27198.2
0.715942	23193.4		0.715942	23697.5		0.715942	21692.9		0.715942	23053.8		0.715942	25160.4		0.715942	27198.2
0.718836	23229.7		0.718836	23722.6		0.718836	21689.3		0.718836	23044.9		0.718836	25143.4		0.718836	27172.6
0.72173	23264.8		0.72173	23747.3		0.72173	21685.4		0.72173	23035.3		0.72173	25126.9		0.72173	27146.8
0.724624	23296.4		0.724624	23768.8		0.724624	21680		0.724624	23025.1		0.724624	25109.2		0.724624	27121.3
0.727518	23326.9		0.727518	23788.9		0.727518	21673.3		0.727518	23012.9		0.727518	25090.8		0.727518	27094
0.730412	23354.1		0.730412	23805.6		0.730412	21663.7		0.730412	22999		0.730412	25069.6		0.730412	27065.3
0.733305	23377		0.733305	23818.1		0.733305	21651.8		0.733305	22981.4		0.733305	25046.2		0.733305	27032.6
0.736199	23395.1		0.736199	23825.7		0.736199	21635.6		0.736199	22960.8		0.736199	25018.3		0.736199	26996.6
0.739093	23407.6		0.739093	23827.8		0.739093	21616		0.739093	22935.3		0.739093	24986.6		0.739093	26954.7
0.741987	23413.9		0.741987	23823.9		0.741987	21590.7		0.741987	22905.7		0.741987	24948.1		0.741987	26907.8
0.744881	23413.5		0.744881	23813.7		0.744881	21561.9		0.744881	22869.4		0.744881	24905.6		0.744881	26852.7
0.747775	23406.4		0.747775	23797		0.747775	21527		0.747775	22829.3		0.747775	24855.9		0.747775	26792.3
0.750669	23392.3		0.750669	23773.9		0.750669	21486.9		0.750669	22783.2		0.750669	24799.5		0.750669	26724.1
0.753563	23372.2		0.753563	23744.5		0.753563	21442.8		0.753563	22731		0.753563	24737.6		0.753563	26647.5
0.756457	23345.6		0.756457	23709.8		0.756457	21394.6		0.756457	22675.2		0.756457	24670.2		0.756457	26565.7
0.75935	23314.1		0.75935	23669.9		0.75935	21343.4		0.75935	22615.5		0.75935	24598.1		0.75935	26477.9
0.762244	23278.3		0.762244	23626.4		0.762244	21290.4		0.762244	22553.4		0.762244	24522.7		0.762244	26386
0.765138	23239.9		0.765138	23580.4		0.765138	21236.7		0.765138	22489.9		0.765138	24444.7		0.765138	26291
0.768032	23200.9		0.768032	23533.7		0.768032	21183.7		0.768032	22426.4		0.768032	24365.8		0.768032	26195
0.770926	23163.4		0.770926	23489.4		0.770926	21133.3		0.770926	22365.1		0.770926	24288.6		0.770926	26100.9
0.77382	23131.6		0.77382	23449.6		0.77382	21087.6		0.77382	22308.3		0.77382	24215.5		0.77382	26010.9
0.776714	23106.4		0.776714	23417		0.776714	21046.8		0.776714	22256.3		0.776714	24147.6		0.776714	25928.7
0.779608	23090.8		0.779608	23392.8		0.779608	21015.7		0.779608	22213.6		0.779608	24089.4		0.779608	25857.4
0.782502	23091.8		0.782502	23384.1		0.782502	21000.5		0.782502	22187.7		0.782502	24049.1		0.782502	25803.9
0.785396	23119.6		0.785396	23401.3		0.785396	21003.8		0.785396	22181.6		0.785396	24030.7		0.785396	25776.8
0.788289	23178.7		0.788289	23449.2		0.788289	21032.3		0.788289	22201.5		0.788289	24042.1		0.788289	25782.9
0.791183	23273.4		0.791183	23533		0.791183	21092.2		0.791183	22254.9		0.791183	24091.1		0.791183	25829.6
0.794077	23408.6		0.794077	23657.7		0.794077	21186.3		0.794077	22345		0.794077	24181.9		0.794077	25922.5
0.796971	23583.2		0.796971	23823.6		0.796971	21315.5		0.796971	22473.1		0.796971	24316.2		0.796971	26063
0.799865	23795.3		0.799865	24028.7		0.799865	21479.2		0.799865	22638.8		0.799865	24493.8		0.799865	26250.5
0.799865	23795.3		0.799865	24028.7		0.799865	21479.2		0.799865	22638.8		0.799865	24493.8		0.799865	26250.5
0.802759	24040.8		0.802759	24269.2		0.802759	21674.5		0.802759	22839.3		0.802759	24711.4		0.802759	26482
0.805653	24314.3		0.805653	24540		0.805653	21897.3		0.805653	23070.7		0.805653	24964.4		0.805653	26752.1
0.808547	24608.5		0.808547	24833.8		0.808547	22142.1		0.808547	23326.9		0.808547	25246.5		0.808547	27054.1
0.811441	24913.5		0.811441	25141		0.811441	22401.3		0.811441	23600.2		0.811441	25548.1		0.811441	27377.4
0.814334	25218.7		0.814334	25449.7		0.814334	22665.2		0.814334	23880		0.814334	25857.4		0.814334	27709.4
0.817228	25511.7		0.817228	25748.3		0.817228	22923.5		0.817228	24155.1		0.817228	26160.8		0.817228	28035.3
0.820122	25780.7		0.820122	26024.8		0.820122	23165		0.820122	24412.3		0.820122	26445.7		0.820122	28341.2
0.823016	26018.4		0.823016	26269.9		0.823016	23383.7		0.823016	24644.2		0.823016	26700.1		0.823016	28614
0.82591	26219		0.82591	26478.8		0.82591	23573		0.82591	24843.9		0.82591	26920.4		0.82591	28849.4
0.828804	26388.4		0.828804	26656.6		0.828804	23736.6		0.828804	25014.5		0.828804	27102.1		0.828804	29042.7
0.831698	26547.5		0.831698	26821.8		0.831698	23890.1		0.831698	25172.5		0.831698	27268		0.831698	29217.8
0.834592	26768.1		0.834592	27041.3		0.834592	24084.4		0.834592	25371.8		0.834592	27483.9		0.834592	29444.3
0.837486	27154.9		0.837486	27426.8		0.837486	24415.8		0.837486	25715.1		0.837486	27850		0.837486	29832.1
0.840379	27744.5		0.840379	28027.8		0.840379	24933.6		0.840379	26255.2		0.840379	28434.3		0.840379	30459.4
0.843273	28502.8		0.843273	28811.4		0.843273	25615.1		0.843273	26969.7		0.843273	29214.3		0.843273	31305.5
0.846167	29376.8		0.846167	29724.8		0.846167	26421.7		0.846167	27815.9		0.846167	30141.5		0.846167	32317
0.849061	30318.2		0.849061	30722.8		0.849061	27321.6		0.849061	28754.2		0.849061	31167.9		0.849061	33438.5
0.851955	31317.6		0.851955	31797.7		0.851955	28322.9		0.851955	29793.6		0.851955	32299.1		0.851955	34670.7
0.854849	32289.3		0.854849	32848.3		0.854849	29329.8		0.854849	30847.6		0.854849	33453		0.854849	35930
0.857743	33096.1		0.857743	33727.1		0.857743	30197.5		0.857743	31762		0.857743	34462.2		0.857743	37036.4
0.860637	33740.8		0.860637	34438.2		0.860637	30931.1		0.860637	32530.7		0.860637	35306.4		0.860637	37958.9
0.863531	34639.9		0.863531	35388.7		0.863531	31854.5		0.863531	33501.1		0.863531	36369.5		0.863531	39112.2
0.866424	36364.5		0.866424	37196.6		0.866424	33504.5		0.866424	35243.6		0.866424	38287		0.866424	41197.9
0.869318	38706.5		0.869318	39691.1		0.869318	35785.6		0.869318	37653.7		0.869318	40945.3		0.869318	44100.9
0.872212	40925.7		0.872212	42099.3		0.872212	38039.7		0.872212	40033.2		0.872212	43571.1		0.872212	46974.4
0.875106	42474.4		0.875106	43828.5		0.875106	39712.4		0.875106	41795.3		0.875106	45515.1		0.875106	49105.5
0.878	43027.8		0.878	44463.8		0.878	40344		0.878	42459.1		0.878	46247.3		0.878	49909.2
