# Supplementary material for: Assessment of the impact of using Ammonia-Hydrogen fuel blend in a diffusion combustor: A numerical approach
Source: Research Square preprint supplement (doi:10.21203/rs.3.rs-7960312/v1), 2025-11-25
Supplement: Supplementary file 11 [file f13908f2fb0e019b01c780e0.xlsx]

## Sheet: Axial temp distribution
SN 0			SN 0.2			SN 0.4			SN 0.6			SN 0.8			SN 1
Axial distance	temperature		Axial distance	temperature		Axial distance	temperature		Axial distance	temperature		Axial distance	temperature		Axial distance	temperature
0.00115113	318.7		0.00115113	318.824		0.00115113	318.809		0.00115113	317.674		0.00115113	316.303		0.00115113	316.753
0.00404502	325.035		0.00404502	325.06		0.00404502	324.853		0.00404502	323.733		0.00404502	322.41		0.00404502	323.098
0.00693891	331.592		0.00693891	331.546		0.00693891	331.119		0.00693891	330.261		0.00693891	329.047		0.00693891	329.905
0.0098328	338.242		0.0098328	338.414		0.0098328	337.796		0.0098328	337.288		0.0098328	336.153		0.0098328	337.15
0.0127267	345.025		0.0127267	345.467		0.0127267	344.601		0.0127267	344.554		0.0127267	343.656		0.0127267	344.739
0.0156206	351.82		0.0156206	352.269		0.0156206	351.192		0.0156206	351.751		0.0156206	351.413		0.0156206	352.551
0.0185145	358.448		0.0185145	358.849		0.0185145	357.751		0.0185145	359.019		0.0185145	359.249		0.0185145	360.441
0.0214084	364.797		0.0214084	365.174		0.0214084	364.159		0.0214084	366.201		0.0214084	367.06		0.0214084	368.14
0.0243023	370.988		0.0243023	371.346		0.0243023	370.478		0.0243023	373.212		0.0243023	374.649		0.0243023	375.404
0.0271961	377.171		0.0271961	377.458		0.0271961	376.516		0.0271961	380.261		0.0271961	381.828		0.0271961	382.223
0.03009	383.185		0.03009	383.393		0.03009	382.372		0.03009	387.302		0.03009	388.503		0.03009	388.569
0.0329839	388.981		0.0329839	389.109		0.0329839	388.337		0.0329839	394.1		0.0329839	394.741		0.0329839	394.378
0.0358778	394.506		0.0358778	394.597		0.0358778	394.154		0.0358778	400.349		0.0358778	400.578		0.0358778	399.681
0.0387717	399.781		0.0387717	399.882		0.0387717	399.75		0.0387717	406.112		0.0387717	405.619		0.0387717	404.508
0.0416656	404.662		0.0416656	404.977		0.0416656	405.106		0.0416656	411.753		0.0416656	410.428		0.0416656	409.194
0.0445595	409.375		0.0445595	409.888		0.0445595	410.213		0.0445595	417.264		0.0445595	415.32		0.0445595	413.701
0.0474534	414.193		0.0474534	414.624		0.0474534	415.143		0.0474534	422.58		0.0474534	420.032		0.0474534	417.958
0.0503473	418.912		0.0503473	419.207		0.0503473	419.999		0.0503473	427.945		0.0503473	424.803		0.0503473	422.311
0.0532412	423.494		0.0532412	423.633		0.0532412	424.759		0.0532412	434.053		0.0532412	429.994		0.0532412	426.602
0.056135	427.939		0.056135	427.928		0.056135	429.438		0.056135	441.757		0.056135	436.352		0.056135	430.878
0.0590289	432.234		0.0590289	432.141		0.0590289	434.105		0.0590289	452.817		0.0590289	445.008		0.0590289	435.39
0.0619228	436.405		0.0619228	436.277		0.0619228	438.734		0.0619228	471.773		0.0619228	458.756		0.0619228	440.25
0.0648167	440.501		0.0648167	440.317		0.0648167	443.254		0.0648167	506.69		0.0648167	483.672		0.0648167	446.287
0.0677106	444.535		0.0677106	444.276		0.0677106	447.805		0.0677106	571.872		0.0677106	530.327		0.0677106	455.148
0.0706045	448.492		0.0706045	448.194		0.0706045	452.524		0.0706045	686.942		0.0706045	615.524		0.0706045	470.024
0.0734984	452.389		0.0734984	452.076		0.0734984	457.412		0.0734984	858.759		0.0734984	754.762		0.0734984	496.676
0.0763923	456.265		0.0763923	455.924		0.0763923	462.516		0.0763923	1063		0.0763923	942.061		0.0763923	544.369
0.0792862	460.12		0.0792862	459.719		0.0792862	467.863		0.0792862	1246.82		0.0792862	1140.49		0.0792862	627.78
0.0821801	463.95		0.0821801	463.475		0.0821801	473.664		0.0821801	1361.93		0.0821801	1295.22		0.0821801	757.572
0.085074	467.748		0.085074	467.225		0.085074	480.517		0.085074	1395.62		0.085074	1369.67		0.085074	927.54
0.085074	467.748		0.085074	467.225		0.085074	480.517		0.085074	1395.62		0.085074	1369.67		0.085074	927.54
0.0879678	471.524		0.0879678	470.977		0.0879678	489.656		0.0879678	1375.14		0.0879678	1372.37		0.0879678	1111.63
0.0908617	475.303		0.0908617	474.736		0.0908617	503.663		0.0908617	1337.34		0.0908617	1341.22		0.0908617	1268.73
0.0937556	479.087		0.0937556	478.492		0.0937556	527.749		0.0937556	1299.06		0.0937556	1305.24		0.0937556	1365.39
0.0966495	482.872		0.0966495	482.26		0.0966495	570.544		0.0966495	1265		0.0966495	1273.49		0.0966495	1393.09
0.0995434	486.677		0.0995434	486.073		0.0995434	642.593		0.0995434	1236.14		0.0995434	1247.7		0.0995434	1375.55
0.102437	490.507		0.102437	489.934		0.102437	750.942		0.102437	1211.64		0.102437	1227.08		0.102437	1345.63
0.105331	494.373		0.105331	493.837		0.105331	893.17		0.105331	1190.84		0.105331	1210.72		0.105331	1316.64
0.108225	498.282		0.108225	497.804		0.108225	1055.97		0.108225	1173.29		0.108225	1197.62		0.108225	1292.04
0.111119	502.241		0.111119	501.833		0.111119	1217.59		0.111119	1158.57		0.111119	1187.13		0.111119	1272.57
0.114013	506.24		0.114013	505.918		0.114013	1353.63		0.114013	1146.37		0.114013	1178.83		0.114013	1257.2
0.116907	510.291		0.116907	510.082		0.116907	1446.39		0.116907	1136.31		0.116907	1172.24		0.116907	1245.12
0.119801	514.422		0.119801	514.317		0.119801	1489.26		0.119801	1128.06		0.119801	1167.11		0.119801	1235.62
0.122695	518.63		0.122695	518.638		0.122695	1486.25		0.122695	1121.37		0.122695	1163.21		0.122695	1228.17
0.125588	522.92		0.125588	523.092		0.125588	1453.37		0.125588	1116.01		0.125588	1160.25		0.125588	1222.42
0.128482	527.29		0.128482	527.681		0.128482	1408.25		0.128482	1111.77		0.128482	1158		0.128482	1217.98
0.131376	531.746		0.131376	532.396		0.131376	1360.47		0.131376	1108.44		0.131376	1156.28		0.131376	1214.5
0.13427	536.289		0.13427	537.242		0.13427	1314.73		0.13427	1105.83		0.13427	1154.96		0.13427	1211.81
0.137164	540.924		0.137164	542.224		0.137164	1273.09		0.137164	1103.79		0.137164	1153.92		0.137164	1209.77
0.140058	545.672		0.140058	547.337		0.140058	1236.57		0.140058	1102.2		0.140058	1153.1		0.140058	1208.21
0.142952	550.533		0.142952	552.609		0.142952	1205.38		0.142952	1100.95		0.142952	1152.43		0.142952	1207
0.145846	555.494		0.145846	558.061		0.145846	1178.96		0.145846	1099.96		0.145846	1151.87		0.145846	1206.03
0.14874	560.574		0.14874	563.693		0.14874	1156.66		0.14874	1099.16		0.14874	1151.38		0.14874	1205.23
0.151633	565.781		0.151633	569.488		0.151633	1137.81		0.151633	1098.51		0.151633	1150.95		0.151633	1204.55
0.154527	571.095		0.154527	575.456		0.154527	1121.9		0.154527	1097.98		0.154527	1150.55		0.154527	1203.95
0.157421	576.545		0.157421	581.615		0.157421	1108.57		0.157421	1097.54		0.157421	1150.16		0.157421	1203.41
0.160315	581.989		0.160315	587.967		0.160315	1097.42		0.160315	1097.15		0.160315	1149.8		0.160315	1202.89
0.163209	587.588		0.163209	594.519		0.163209	1088.15		0.163209	1096.8		0.163209	1149.44		0.163209	1202.4
0.166103	593.517		0.166103	601.276		0.166103	1080.48		0.166103	1096.48		0.166103	1149.09		0.166103	1201.92
0.166103	593.517		0.166103	601.276		0.166103	1080.48		0.166103	1096.48		0.166103	1149.09		0.166103	1201.92
0.168997	599.559		0.168997	608.208		0.168997	1074.16		0.168997	1096.18		0.168997	1148.73		0.168997	1201.46
0.171891	605.703		0.171891	615.307		0.171891	1068.98		0.171891	1095.89		0.171891	1148.39		0.171891	1201
0.174785	611.992		0.174785	622.604		0.174785	1064.74		0.174785	1095.6		0.174785	1148.04		0.174785	1200.54
0.177678	618.389		0.177678	630.104		0.177678	1061.3		0.177678	1095.32		0.177678	1147.69		0.177678	1200.09
0.180572	624.876		0.180572	637.762		0.180572	1058.52		0.180572	1095.05		0.180572	1147.34		0.180572	1199.64
0.183466	631.495		0.183466	645.575		0.183466	1056.3		0.183466	1094.77		0.183466	1146.99		0.183466	1199.19
0.18636	638.213		0.18636	653.558		0.18636	1054.52		0.18636	1094.49		0.18636	1146.63		0.18636	1198.73
0.189254	645.011		0.189254	661.691		0.189254	1053.1		0.189254	1094.21		0.189254	1146.27		0.189254	1198.27
0.192148	651.92		0.192148	669.985		0.192148	1051.98		0.192148	1093.93		0.192148	1145.91		0.192148	1197.8
0.195042	658.902		0.195042	678.408		0.195042	1051.07		0.195042	1093.64		0.195042	1145.54		0.195042	1197.33
0.197936	665.94		0.197936	686.856		0.197936	1050.34		0.197936	1093.35		0.197936	1145.17		0.197936	1196.85
0.20083	673.062		0.20083	695.347		0.20083	1049.73		0.20083	1093.06		0.20083	1144.79		0.20083	1196.36
0.203723	680.234		0.203723	703.985		0.203723	1049.23		0.203723	1092.76		0.203723	1144.41		0.203723	1195.87
0.206617	687.374		0.206617	712.752		0.206617	1048.8		0.206617	1092.46		0.206617	1144.02		0.206617	1195.37
0.209511	694.497		0.209511	721.606		0.209511	1048.42		0.209511	1092.15		0.209511	1143.63		0.209511	1194.87
0.212405	701.677		0.212405	730.564		0.212405	1048.09		0.212405	1091.84		0.212405	1143.23		0.212405	1194.36
0.215299	708.988		0.215299	739.685		0.215299	1047.78		0.215299	1091.53		0.215299	1142.83		0.215299	1193.84
0.215299	708.988		0.215299	739.685		0.215299	1047.78		0.215299	1091.53		0.215299	1142.83		0.215299	1193.84
0.218193	716.436		0.218193	748.971		0.218193	1047.49		0.218193	1091.21		0.218193	1142.42		0.218193	1193.31
0.221087	723.943		0.221087	758.388		0.221087	1047.21		0.221087	1090.89		0.221087	1142.01		0.221087	1192.78
0.223981	731.489		0.223981	767.928		0.223981	1046.95		0.223981	1090.56		0.223981	1141.59		0.223981	1192.24
0.226875	739.054		0.226875	777.571		0.226875	1046.69		0.226875	1090.23		0.226875	1141.16		0.226875	1191.7
0.229768	746.635		0.229768	787.311		0.229768	1046.43		0.229768	1089.9		0.229768	1140.74		0.229768	1191.15
0.232662	754.255		0.232662	797.165		0.232662	1046.17		0.232662	1089.56		0.232662	1140.3		0.232662	1190.59
0.235556	761.916		0.235556	807.117		0.235556	1045.92		0.235556	1089.22		0.235556	1139.87		0.235556	1190.03
0.23845	769.601		0.23845	817.164		0.23845	1045.66		0.23845	1088.88		0.23845	1139.42		0.23845	1189.46
0.241344	777.287		0.241344	827.342		0.241344	1045.4		0.241344	1088.53		0.241344	1138.98		0.241344	1188.88
0.244238	784.99		0.244238	837.665		0.244238	1045.14		0.244238	1088.18		0.244238	1138.53		0.244238	1188.3
0.247132	792.744		0.247132	848.122		0.247132	1044.87		0.247132	1087.83		0.247132	1138.07		0.247132	1187.71
0.250026	800.559		0.250026	858.714		0.250026	1044.6		0.250026	1087.47		0.250026	1137.61		0.250026	1187.11
0.25292	808.415		0.25292	869.446		0.25292	1044.33		0.25292	1087.11		0.25292	1137.15		0.25292	1186.51
0.255814	816.306		0.255814	880.325		0.255814	1044.06		0.255814	1086.75		0.255814	1136.68		0.255814	1185.91
0.258707	824.256		0.258707	891.357		0.258707	1043.78		0.258707	1086.38		0.258707	1136.2		0.258707	1185.29
0.261601	832.27		0.261601	902.543		0.261601	1043.5		0.261601	1086.01		0.261601	1135.72		0.261601	1184.67
0.264495	840.349		0.264495	913.892		0.264495	1043.22		0.264495	1085.64		0.264495	1135.24		0.264495	1184.05
0.267389	848.476		0.267389	925.414		0.267389	1042.93		0.267389	1085.26		0.267389	1134.76		0.267389	1183.42
0.270283	856.658		0.270283	937.136		0.270283	1042.65		0.270283	1084.88		0.270283	1134.27		0.270283	1182.78
0.273177	864.923		0.273177	949.061		0.273177	1042.35		0.273177	1084.5		0.273177	1133.77		0.273177	1182.14
0.276071	873.273		0.276071	961.17		0.276071	1042.06		0.276071	1084.12		0.276071	1133.27		0.276071	1181.49
0.278965	881.71		0.278965	973.456		0.278965	1041.76		0.278965	1083.73		0.278965	1132.77		0.278965	1180.84
0.281859	890.249		0.281859	985.957		0.281859	1041.46		0.281859	1083.34		0.281859	1132.26		0.281859	1180.18
0.284752	898.883		0.284752	998.684		0.284752	1041.16		0.284752	1082.95		0.284752	1131.75		0.284752	1179.52
0.287646	907.599		0.287646	1011.61		0.287646	1040.85		0.287646	1082.55		0.287646	1131.24		0.287646	1178.85
0.29054	916.415		0.29054	1024.75		0.29054	1040.54		0.29054	1082.15		0.29054	1130.72		0.29054	1178.18
0.293434	925.355		0.293434	1038.1		0.293434	1040.23		0.293434	1081.75		0.293434	1130.2		0.293434	1177.5
0.296328	934.434		0.296328	1051.65		0.296328	1039.92		0.296328	1081.35		0.296328	1129.67		0.296328	1176.82
0.299222	943.675		0.299222	1065.5		0.299222	1039.61		0.299222	1080.94		0.299222	1129.15		0.299222	1176.13
0.302116	953.088		0.302116	1079.7		0.302116	1039.29		0.302116	1080.54		0.302116	1128.61		0.302116	1175.44
0.30501	962.684		0.30501	1094.27		0.30501	1038.97		0.30501	1080.13		0.30501	1128.08		0.30501	1174.74
0.307904	972.489		0.307904	1109.14		0.307904	1038.65		0.307904	1079.71		0.307904	1127.54		0.307904	1174.04
0.310797	982.477		0.310797	1124.12		0.310797	1038.32		0.310797	1079.3		0.310797	1126.99		0.310797	1173.33
0.313691	992.634		0.313691	1139.22		0.313691	1038		0.313691	1078.88		0.313691	1126.45		0.313691	1172.62
0.313691	992.634		0.313691	1139.22		0.313691	1038		0.313691	1078.88		0.313691	1126.45		0.313691	1172.62
0.316585	1003		0.316585	1154.54		0.316585	1037.67		0.316585	1078.46		0.316585	1125.89		0.316585	1171.9
0.319479	1013.59		0.319479	1170.13		0.319479	1037.34		0.319479	1078.04		0.319479	1125.34		0.319479	1171.18
0.322373	1024.44		0.322373	1185.99		0.322373	1037.01		0.322373	1077.62		0.322373	1124.78		0.322373	1170.46
0.325267	1035.54		0.325267	1202.19		0.325267	1036.67		0.325267	1077.19		0.325267	1124.22		0.325267	1169.73
0.328161	1046.93		0.328161	1218.68		0.328161	1036.34		0.328161	1076.76		0.328161	1123.66		0.328161	1169
0.331055	1058.65		0.331055	1235.46		0.331055	1036		0.331055	1076.33		0.331055	1123.09		0.331055	1168.27
0.333949	1070.73		0.333949	1252.52		0.333949	1035.67		0.333949	1075.9		0.333949	1122.52		0.333949	1167.53
0.336842	1083.14		0.336842	1269.78		0.336842	1035.33		0.336842	1075.46		0.336842	1121.95		0.336842	1166.78
0.339736	1095.9		0.339736	1287.36		0.339736	1034.98		0.339736	1075.02		0.339736	1121.37		0.339736	1166.04
0.34263	1109.05		0.34263	1305.22		0.34263	1034.64		0.34263	1074.58		0.34263	1120.79		0.34263	1165.29
0.345524	1122.53		0.345524	1323.3		0.345524	1034.3		0.345524	1074.14		0.345524	1120.21		0.345524	1164.53
0.348418	1136.36		0.348418	1341.59		0.348418	1033.95		0.348418	1073.7		0.348418	1119.63		0.348418	1163.77
0.351312	1150.61		0.351312	1360.12		0.351312	1033.61		0.351312	1073.25		0.351312	1119.04		0.351312	1163.01
0.354206	1165.24		0.354206	1378.97		0.354206	1033.26		0.354206	1072.8		0.354206	1118.45		0.354206	1162.25
0.3571	1180.37		0.3571	1398.12		0.3571	1032.91		0.3571	1072.36		0.3571	1117.85		0.3571	1161.48
0.359994	1196.07		0.359994	1417.46		0.359994	1032.56		0.359994	1071.9		0.359994	1117.26		0.359994	1160.72
0.362887	1212.2		0.362887	1436.89		0.362887	1032.2		0.362887	1071.45		0.362887	1116.66		0.362887	1159.94
0.365781	1228.72		0.365781	1456.42		0.365781	1031.85		0.365781	1070.99		0.365781	1116.06		0.365781	1159.17
0.368675	1245.7		0.368675	1476.04		0.368675	1031.5		0.368675	1070.54		0.368675	1115.45		0.368675	1158.39
0.371569	1263.15		0.371569	1495.84		0.371569	1031.14		0.371569	1070.08		0.371569	1114.84		0.371569	1157.61
0.374463	1281.11		0.374463	1515.84		0.374463	1030.78		0.374463	1069.62		0.374463	1114.24		0.374463	1156.83
0.377357	1299.6		0.377357	1535.71		0.377357	1030.42		0.377357	1069.15		0.377357	1113.62		0.377357	1156.04
0.380251	1318.56		0.380251	1555.38		0.380251	1030.07		0.380251	1068.69		0.380251	1113.01		0.380251	1155.26
0.383145	1337.97		0.383145	1575.08		0.383145	1029.7		0.383145	1068.22		0.383145	1112.39		0.383145	1154.47
0.386039	1357.81		0.386039	1594.91		0.386039	1029.34		0.386039	1067.76		0.386039	1111.78		0.386039	1153.68
0.388932	1378.19		0.388932	1614.55		0.388932	1028.98		0.388932	1067.29		0.388932	1111.15		0.388932	1152.88
0.391826	1398.89		0.391826	1633.81		0.391826	1028.62		0.391826	1066.81		0.391826	1110.53		0.391826	1152.09
0.39472	1419.78		0.39472	1652.7		0.39472	1028.25		0.39472	1066.34		0.39472	1109.91		0.39472	1151.29
0.397614	1441		0.397614	1671.34		0.397614	1027.88		0.397614	1065.87		0.397614	1109.28		0.397614	1150.49
0.400508	1462.56		0.400508	1689.53		0.400508	1027.52		0.400508	1065.39		0.400508	1108.65		0.400508	1149.69
0.403402	1484.28		0.403402	1706.96		0.403402	1027.15		0.403402	1064.91		0.403402	1108.02		0.403402	1148.89
0.403402	1484.28		0.403402	1706.96		0.403402	1027.15		0.403402	1064.91		0.403402	1108.02		0.403402	1148.89
0.406296	1505.92		0.406296	1723.84		0.406296	1026.78		0.406296	1064.43		0.406296	1107.39		0.406296	1148.09
0.40919	1527.47		0.40919	1739.9		0.40919	1026.41		0.40919	1063.95		0.40919	1106.75		0.40919	1147.29
0.412084	1548.86		0.412084	1754.73		0.412084	1026.04		0.412084	1063.47		0.412084	1106.12		0.412084	1146.49
0.414977	1569.99		0.414977	1768.1		0.414977	1025.67		0.414977	1062.99		0.414977	1105.48		0.414977	1145.68
0.417871	1590.68		0.417871	1779.7		0.417871	1025.29		0.417871	1062.5		0.417871	1104.84		0.417871	1144.88
0.420765	1610.95		0.420765	1788.33		0.420765	1024.92		0.420765	1062.01		0.420765	1104.2		0.420765	1144.07
0.423659	1630.47		0.423659	1794.09		0.423659	1024.54		0.423659	1061.52		0.423659	1103.56		0.423659	1143.26
0.426553	1649.15		0.426553	1797.77		0.426553	1024.17		0.426553	1061.04		0.426553	1102.92		0.426553	1142.46
0.429447	1666.75		0.429447	1799.22		0.429447	1023.79		0.429447	1060.54		0.429447	1102.28		0.429447	1141.65
0.432341	1682.58		0.432341	1798.7		0.432341	1023.41		0.432341	1060.05		0.432341	1101.63		0.432341	1140.84
0.435235	1696.64		0.435235	1795.92		0.435235	1023.03		0.435235	1059.56		0.435235	1100.99		0.435235	1140.03
0.438129	1707.61		0.438129	1791.18		0.438129	1022.65		0.438129	1059.06		0.438129	1100.34		0.438129	1139.23
0.441023	1715.05		0.441023	1785.04		0.441023	1022.27		0.441023	1058.57		0.441023	1099.69		0.441023	1138.42
0.443916	1720.12		0.443916	1777.41		0.443916	1021.89		0.443916	1058.07		0.443916	1099.04		0.443916	1137.61
0.44681	1722.91		0.44681	1768.46		0.44681	1021.5		0.44681	1057.57		0.44681	1098.39		0.44681	1136.8
0.449704	1723.4		0.449704	1758.62		0.449704	1021.12		0.449704	1057.07		0.449704	1097.74		0.449704	1136
0.452598	1721.61		0.452598	1747.82		0.452598	1020.73		0.452598	1056.57		0.452598	1097.09		0.452598	1135.19
0.455492	1717.85		0.455492	1736.04		0.455492	1020.35		0.455492	1056.07		0.455492	1096.44		0.455492	1134.38
0.458386	1712.38		0.458386	1723.57		0.458386	1019.96		0.458386	1055.57		0.458386	1095.79		0.458386	1133.58
0.46128	1705.39		0.46128	1710.61		0.46128	1019.57		0.46128	1055.07		0.46128	1095.14		0.46128	1132.77
0.464174	1697.02		0.464174	1697.12		0.464174	1019.18		0.464174	1054.56		0.464174	1094.48		0.464174	1131.97
0.467068	1687.42		0.467068	1683.15		0.467068	1018.79		0.467068	1054.06		0.467068	1093.83		0.467068	1131.17
0.469961	1676.95		0.469961	1668.81		0.469961	1018.4		0.469961	1053.55		0.469961	1093.18		0.469961	1130.36
0.472855	1665.57		0.472855	1654.11		0.472855	1018.01		0.472855	1053.04		0.472855	1092.52		0.472855	1129.56
0.475749	1653.4		0.475749	1639.25		0.475749	1017.62		0.475749	1052.54		0.475749	1091.87		0.475749	1128.76
0.478643	1640.62		0.478643	1624.35		0.478643	1017.23		0.478643	1052.03		0.478643	1091.21		0.478643	1127.96
0.481537	1627.3		0.481537	1609.49		0.481537	1016.83		0.481537	1051.52		0.481537	1090.56		0.481537	1127.16
0.484431	1613.82		0.484431	1594.53		0.484431	1016.44		0.484431	1051.01		0.484431	1089.91		0.484431	1126.36
0.487325	1600.03		0.487325	1579.47		0.487325	1016.04		0.487325	1050.5		0.487325	1089.25		0.487325	1125.57
0.490219	1585.8		0.490219	1564.49		0.490219	1015.65		0.490219	1049.99		0.490219	1088.6		0.490219	1124.77
0.493113	1571.41		0.493113	1549.68		0.493113	1015.25		0.493113	1049.48		0.493113	1087.95		0.493113	1123.98
0.496006	1556.87		0.496006	1535.1		0.496006	1014.85		0.496006	1048.97		0.496006	1087.29		0.496006	1123.19
0.4989	1542.22		0.4989	1520.66		0.4989	1014.45		0.4989	1048.45		0.4989	1086.64		0.4989	1122.4
0.501794	1527.61		0.501794	1506.32		0.501794	1014.06		0.501794	1047.94		0.501794	1085.99		0.501794	1121.61
0.504688	1512.99		0.504688	1492.14		0.504688	1013.66		0.504688	1047.43		0.504688	1085.34		0.504688	1120.82
0.507582	1498.44		0.507582	1478.11		0.507582	1013.26		0.507582	1046.91		0.507582	1084.68		0.507582	1120.03
0.510476	1484.07		0.510476	1464.32		0.510476	1012.86		0.510476	1046.4		0.510476	1084.03		0.510476	1119.25
0.51337	1469.91		0.51337	1450.79		0.51337	1012.45		0.51337	1045.89		0.51337	1083.38		0.51337	1118.47
0.516264	1456.01		0.516264	1437.59		0.516264	1012.05		0.516264	1045.37		0.516264	1082.73		0.516264	1117.69
0.519158	1442.24		0.519158	1424.69		0.519158	1011.65		0.519158	1044.86		0.519158	1082.09		0.519158	1116.91
0.522051	1428.59		0.522051	1412.13		0.522051	1011.25		0.522051	1044.34		0.522051	1081.44		0.522051	1116.13
0.524945	1415.21		0.524945	1399.89		0.524945	1010.84		0.524945	1043.83		0.524945	1080.79		0.524945	1115.36
0.524945	1415.21		0.524945	1399.89		0.524945	1010.84		0.524945	1043.83		0.524945	1080.79		0.524945	1115.36
0.527839	1402.09		0.527839	1387.93		0.527839	1010.44		0.527839	1043.31		0.527839	1080.14		0.527839	1114.59
0.530733	1389.25		0.530733	1376.28		0.530733	1010.04		0.530733	1042.8		0.530733	1079.5		0.530733	1113.82
0.533627	1376.69		0.533627	1364.93		0.533627	1009.63		0.533627	1042.28		0.533627	1078.86		0.533627	1113.05
0.536521	1364.41		0.536521	1353.88		0.536521	1009.22		0.536521	1041.77		0.536521	1078.21		0.536521	1112.28
0.539415	1352.39		0.539415	1343.13		0.539415	1008.82		0.539415	1041.25		0.539415	1077.57		0.539415	1111.52
0.542309	1340.68		0.542309	1332.69		0.542309	1008.41		0.542309	1040.74		0.542309	1076.93		0.542309	1110.76
0.545203	1329.28		0.545203	1322.54		0.545203	1008.01		0.545203	1040.22		0.545203	1076.29		0.545203	1110
0.548096	1318.19		0.548096	1312.68		0.548096	1007.6		0.548096	1039.71		0.548096	1075.65		0.548096	1109.24
0.55099	1307.37		0.55099	1303.1		0.55099	1007.19		0.55099	1039.2		0.55099	1075.02		0.55099	1108.49
0.553884	1296.83		0.553884	1293.81		0.553884	1006.78		0.553884	1038.68		0.553884	1074.38		0.553884	1107.74
0.556778	1286.59		0.556778	1284.8		0.556778	1006.38		0.556778	1038.17		0.556778	1073.75		0.556778	1106.99
0.559672	1276.64		0.559672	1276.06		0.559672	1005.97		0.559672	1037.66		0.559672	1073.11		0.559672	1106.24
0.562566	1266.99		0.562566	1267.58		0.562566	1005.56		0.562566	1037.14		0.562566	1072.48		0.562566	1105.5
0.56546	1257.65		0.56546	1259.37		0.56546	1005.15		0.56546	1036.63		0.56546	1071.85		0.56546	1104.75
0.568354	1248.59		0.568354	1251.44		0.568354	1004.74		0.568354	1036.12		0.568354	1071.23		0.568354	1104.02
0.571248	1239.8		0.571248	1243.76		0.571248	1004.33		0.571248	1035.61		0.571248	1070.6		0.571248	1103.28
0.574142	1231.27		0.574142	1236.32		0.574142	1003.92		0.574142	1035.1		0.574142	1069.97		0.574142	1102.55
0.577035	1223.03		0.577035	1229.11		0.577035	1003.51		0.577035	1034.59		0.577035	1069.35		0.577035	1101.81
0.579929	1215.08		0.579929	1222.14		0.579929	1003.1		0.579929	1034.08		0.579929	1068.73		0.579929	1101.09
0.582823	1207.4		0.582823	1215.4		0.582823	1002.69		0.582823	1033.57		0.582823	1068.11		0.582823	1100.36
0.585717	1199.97		0.585717	1208.9		0.585717	1002.28		0.585717	1033.06		0.585717	1067.49		0.585717	1099.64
0.588611	1192.75		0.588611	1202.6		0.588611	1001.87		0.588611	1032.56		0.588611	1066.88		0.588611	1098.92
0.591505	1185.76		0.591505	1196.5		0.591505	1001.46		0.591505	1032.05		0.591505	1066.26		0.591505	1098.2
0.594399	1179.04		0.594399	1190.58		0.594399	1001.05		0.594399	1031.55		0.594399	1065.65		0.594399	1097.49
0.597293	1172.57		0.597293	1184.85		0.597293	1000.64		0.597293	1031.04		0.597293	1065.04		0.597293	1096.78
0.600186	1166.32		0.600186	1179.32		0.600186	1000.23		0.600186	1030.54		0.600186	1064.43		0.600186	1096.07
0.60308	1160.27		0.60308	1173.99		0.60308	999.823		0.60308	1030.03		0.60308	1063.83		0.60308	1095.36
0.605974	1154.39		0.605974	1168.85		0.605974	999.414		0.605974	1029.53		0.605974	1063.22		0.605974	1094.66
0.608868	1148.69		0.608868	1163.87		0.608868	999.004		0.608868	1029.03		0.608868	1062.62		0.608868	1093.96
0.611762	1143.2		0.611762	1159.06		0.611762	998.595		0.611762	1028.53		0.611762	1062.02		0.611762	1093.26
0.614656	1137.92		0.614656	1154.39		0.614656	998.186		0.614656	1028.04		0.614656	1061.42		0.614656	1092.57
0.61755	1132.85		0.61755	1149.86		0.61755	997.777		0.61755	1027.54		0.61755	1060.83		0.61755	1091.88
0.620444	1127.97		0.620444	1145.46		0.620444	997.369		0.620444	1027.04		0.620444	1060.24		0.620444	1091.19
0.623338	1123.26		0.623338	1141.2		0.623338	996.961		0.623338	1026.55		0.623338	1059.65		0.623338	1090.51
0.626231	1118.69		0.626231	1137.06		0.626231	996.553		0.626231	1026.05		0.626231	1059.06		0.626231	1089.83
0.629125	1114.27		0.629125	1133.08		0.629125	996.146		0.629125	1025.56		0.629125	1058.47		0.629125	1089.15
0.632019	1109.98		0.632019	1129.23		0.632019	995.739		0.632019	1025.07		0.632019	1057.89		0.632019	1088.47
0.634913	1105.82		0.634913	1125.5		0.634913	995.333		0.634913	1024.58		0.634913	1057.3		0.634913	1087.8
0.637807	1101.79		0.637807	1121.89		0.637807	994.927		0.637807	1024.1		0.637807	1056.72		0.637807	1087.13
0.640701	1097.91		0.640701	1118.39		0.640701	994.522		0.640701	1023.61		0.640701	1056.15		0.640701	1086.46
0.643595	1094.16		0.643595	1114.97		0.643595	994.117		0.643595	1023.12		0.643595	1055.57		0.643595	1085.8
0.643595	1094.16		0.643595	1114.97		0.643595	994.117		0.643595	1023.12		0.643595	1055.57		0.643595	1085.8
0.646489	1090.53		0.646489	1111.65		0.646489	993.713		0.646489	1022.64		0.646489	1055		0.646489	1085.13
0.649383	1087.02		0.649383	1108.42		0.649383	993.309		0.649383	1022.16		0.649383	1054.43		0.649383	1084.47
0.652277	1083.63		0.652277	1105.28		0.652277	992.907		0.652277	1021.68		0.652277	1053.86		0.652277	1083.82
0.65517	1080.34		0.65517	1102.23		0.65517	992.504		0.65517	1021.2		0.65517	1053.3		0.65517	1083.16
0.658064	1077.16		0.658064	1099.27		0.658064	992.103		0.658064	1020.72		0.658064	1052.73		0.658064	1082.51
0.660958	1074.08		0.660958	1096.4		0.660958	991.703		0.660958	1020.25		0.660958	1052.17		0.660958	1081.87
0.663852	1071.1		0.663852	1093.6		0.663852	991.303		0.663852	1019.77		0.663852	1051.61		0.663852	1081.22
0.666746	1068.21		0.666746	1090.89		0.666746	990.904		0.666746	1019.3		0.666746	1051.05		0.666746	1080.58
0.66964	1065.42		0.66964	1088.25		0.66964	990.506		0.66964	1018.83		0.66964	1050.5		0.66964	1079.94
0.672534	1062.72		0.672534	1085.69		0.672534	990.109		0.672534	1018.36		0.672534	1049.95		0.672534	1079.3
0.675428	1060.1		0.675428	1083.2		0.675428	989.713		0.675428	1017.89		0.675428	1049.4		0.675428	1078.66
0.678322	1057.57		0.678322	1080.79		0.678322	989.318		0.678322	1017.43		0.678322	1048.85		0.678322	1078.03
0.681215	1055.12		0.681215	1078.43		0.681215	988.924		0.681215	1016.96		0.681215	1048.3		0.681215	1077.4
0.684109	1052.74		0.684109	1076.14		0.684109	988.531		0.684109	1016.5		0.684109	1047.76		0.684109	1076.77
0.687003	1050.44		0.687003	1073.91		0.687003	988.139		0.687003	1016.04		0.687003	1047.21		0.687003	1076.14
0.689897	1048.22		0.689897	1071.74		0.689897	987.748		0.689897	1015.58		0.689897	1046.67		0.689897	1075.52
0.692791	1046.06		0.692791	1069.62		0.692791	987.358		0.692791	1015.12		0.692791	1046.13		0.692791	1074.89
0.695685	1043.97		0.695685	1067.56		0.695685	986.969		0.695685	1014.66		0.695685	1045.6		0.695685	1074.27
0.698579	1041.94		0.698579	1065.55		0.698579	986.581		0.698579	1014.21		0.698579	1045.06		0.698579	1073.65
0.701473	1039.98		0.701473	1063.59		0.701473	986.195		0.701473	1013.75		0.701473	1044.53		0.701473	1073.03
0.704367	1038.07		0.704367	1061.67		0.704367	985.809		0.704367	1013.3		0.704367	1043.99		0.704367	1072.41
0.70726	1036.21		0.70726	1059.8		0.70726	985.424		0.70726	1012.85		0.70726	1043.46		0.70726	1071.79
0.710154	1034.41		0.710154	1057.97		0.710154	985.041		0.710154	1012.4		0.710154	1042.93		0.710154	1071.17
0.713048	1032.65		0.713048	1056.18		0.713048	984.658		0.713048	1011.95		0.713048	1042.4		0.713048	1070.56
0.715942	1030.93		0.715942	1054.43		0.715942	984.276		0.715942	1011.5		0.715942	1041.86		0.715942	1069.94
0.715942	1030.93		0.715942	1054.43		0.715942	984.276		0.715942	1011.5		0.715942	1041.86		0.715942	1069.94
0.718836	1029.26		0.718836	1052.72		0.718836	983.896		0.718836	1011.05		0.718836	1041.33		0.718836	1069.32
0.72173	1027.64		0.72173	1051.04		0.72173	983.515		0.72173	1010.6		0.72173	1040.8		0.72173	1068.7
0.724624	1026.05		0.724624	1049.39		0.724624	983.135		0.724624	1010.16		0.724624	1040.27		0.724624	1068.08
0.727518	1024.5		0.727518	1047.78		0.727518	982.756		0.727518	1009.71		0.727518	1039.73		0.727518	1067.45
0.730412	1022.99		0.730412	1046.21		0.730412	982.377		0.730412	1009.26		0.730412	1039.2		0.730412	1066.82
0.733305	1021.52		0.733305	1044.66		0.733305	981.998		0.733305	1008.81		0.733305	1038.66		0.733305	1066.19
0.736199	1020.07		0.736199	1043.14		0.736199	981.619		0.736199	1008.35		0.736199	1038.12		0.736199	1065.56
0.739093	1018.66		0.739093	1041.64		0.739093	981.239		0.739093	1007.9		0.739093	1037.57		0.739093	1064.92
0.741987	1017.28		0.741987	1040.17		0.741987	980.858		0.741987	1007.44		0.741987	1037.02		0.741987	1064.27
0.744881	1015.92		0.744881	1038.72		0.744881	980.475		0.744881	1006.98		0.744881	1036.47		0.744881	1063.61
0.747775	1014.58		0.747775	1037.29		0.747775	980.091		0.747775	1006.52		0.747775	1035.9		0.747775	1062.95
0.750669	1013.27		0.750669	1035.88		0.750669	979.703		0.750669	1006.04		0.750669	1035.33		0.750669	1062.27
0.753563	1011.98		0.753563	1034.48		0.753563	979.312		0.753563	1005.57		0.753563	1034.75		0.753563	1061.59
0.756457	1010.7		0.756457	1033.09		0.756457	978.917		0.756457	1005.08		0.756457	1034.16		0.756457	1060.89
0.75935	1009.44		0.75935	1031.71		0.75935	978.516		0.75935	1004.58		0.75935	1033.56		0.75935	1060.17
0.762244	1008.18		0.762244	1030.34		0.762244	978.108		0.762244	1004.08		0.762244	1032.93		0.762244	1059.43
0.765138	1006.94		0.765138	1028.96		0.765138	977.692		0.765138	1003.56		0.765138	1032.3		0.765138	1058.67
0.768032	1005.7		0.768032	1027.59		0.768032	977.266		0.768032	1003.02		0.768032	1031.64		0.768032	1057.89
0.770926	1004.45		0.770926	1026.2		0.770926	976.829		0.770926	1002.47		0.770926	1030.96		0.770926	1057.08
0.77382	1003.21		0.77382	1024.81		0.77382	976.379		0.77382	1001.9		0.77382	1030.25		0.77382	1056.24
0.776714	1001.95		0.776714	1023.39		0.776714	975.915		0.776714	1001.31		0.776714	1029.52		0.776714	1055.37
0.779608	1000.69		0.779608	1021.96		0.779608	975.434		0.779608	1000.7		0.779608	1028.76		0.779608	1054.46
0.782502	999.409		0.782502	1020.5		0.782502	974.936		0.782502	1000.06		0.782502	1027.97		0.782502	1053.51
0.785396	998.112		0.785396	1019.02		0.785396	974.42		0.785396	999.4		0.785396	1027.14		0.785396	1052.53
0.788289	996.794		0.788289	1017.51		0.788289	973.884		0.788289	998.713		0.788289	1026.28		0.788289	1051.5
0.791183	995.455		0.791183	1015.97		0.791183	973.327		0.791183	997.997		0.791183	1025.38		0.791183	1050.42
0.794077	994.094		0.794077	1014.4		0.794077	972.748		0.794077	997.252		0.794077	1024.45		0.794077	1049.3
0.796971	992.712		0.796971	1012.81		0.796971	972.145		0.796971	996.476		0.796971	1023.47		0.796971	1048.13
0.799865	991.314		0.799865	1011.21		0.799865	971.517		0.799865	995.668		0.799865	1022.46		0.799865	1046.92
0.799865	991.314		0.799865	1011.21		0.799865	971.517		0.799865	995.668		0.799865	1022.46		0.799865	1046.92
0.802759	989.901		0.802759	1009.59		0.802759	970.863		0.802759	994.827		0.802759	1021.4		0.802759	1045.65
0.805653	988.478		0.805653	1007.95		0.805653	970.179		0.805653	993.949		0.805653	1020.3		0.805653	1044.33
0.808547	987.05		0.808547	1006.32		0.808547	969.465		0.808547	993.033		0.808547	1019.15		0.808547	1042.96
0.811441	985.618		0.811441	1004.67		0.811441	968.716		0.811441	992.076		0.811441	1017.96		0.811441	1041.54
0.814334	984.185		0.814334	1003.02		0.814334	967.93		0.814334	991.077		0.814334	1016.71		0.814334	1040.06
0.817228	982.753		0.817228	1001.37		0.817228	967.103		0.817228	990.032		0.817228	1015.42		0.817228	1038.53
0.820122	981.322		0.820122	999.704		0.820122	966.233		0.820122	988.939		0.820122	1014.08		0.820122	1036.94
0.823016	979.893		0.823016	998.035		0.823016	965.317		0.823016	987.796		0.823016	1012.68		0.823016	1035.31
0.82591	978.466		0.82591	996.357		0.82591	964.35		0.82591	986.601		0.82591	1011.23		0.82591	1033.61
0.828804	977.04		0.828804	994.67		0.828804	963.329		0.828804	985.351		0.828804	1009.72		0.828804	1031.87
0.831698	975.615		0.831698	992.974		0.831698	962.253		0.831698	984.047		0.831698	1008.17		0.831698	1030.08
0.834592	974.193		0.834592	991.27		0.834592	961.118		0.834592	982.686		0.834592	1006.56		0.834592	1028.24
0.837486	972.774		0.837486	989.558		0.837486	959.924		0.837486	981.271		0.837486	1004.9		0.837486	1026.35
0.840379	971.36		0.840379	987.842		0.840379	958.671		0.840379	979.801		0.840379	1003.2		0.840379	1024.43
0.843273	969.954		0.843273	986.125		0.843273	957.359		0.843273	978.281		0.843273	1001.45		0.843273	1022.47
0.846167	968.558		0.846167	984.412		0.846167	955.991		0.846167	976.715		0.846167	999.673		0.846167	1020.49
0.849061	967.178		0.849061	982.707		0.849061	954.57		0.849061	975.108		0.849061	997.866		0.849061	1018.49
0.851955	965.818		0.851955	981.018		0.851955	953.105		0.851955	973.468		0.851955	996.04		0.851955	1016.49
0.854849	964.485		0.854849	979.353		0.854849	951.602		0.854849	971.805		0.854849	994.207		0.854849	1014.49
0.857743	963.185		0.857743	977.722		0.857743	950.073		0.857743	970.131		0.857743	992.379		0.857743	1012.5
0.860637	961.928		0.860637	976.136		0.860637	948.533		0.860637	968.463		0.860637	990.573		0.860637	1010.55
0.863531	960.727		0.863531	974.613		0.863531	947.003		0.863531	966.821		0.863531	988.81		0.863531	1008.66
0.866424	959.599		0.866424	973.174		0.866424	945.512		0.866424	965.234		0.866424	987.12		0.866424	1006.86
0.869318	958.571		0.869318	971.854		0.869318	944.102		0.869318	963.747		0.869318	985.547		0.869318	1005.19
0.872212	957.686		0.872212	970.711		0.872212	942.843		0.872212	962.43		0.872212	984.164		0.872212	1003.72
0.875106	957.019		0.875106	969.841		0.875106	941.856		0.875106	961.406		0.875106	983.098		0.875106	1002.6
0.878	956.755		0.878	969.492		0.878	941.449		0.878	960.988		0.878	982.664		0.878	1002.15

## Sheet: Axial Velocity
SN 0			SN 0.2			SN 0.4			SN 0.6			SN 0.8			SN 1
Axial distance	velocity		Axial distance	velocity		Axial distance	velocity		Axial distance	velocity		Axial distance	velocity		Axial distance	velocity
0.00115113	14.0055		0.00115113	14.0715		0.00115113	13.9544		0.00115113	13.4986		0.00115113	13.3184		0.00115113	13.2643
0.00404502	14.0151		0.00404502	14.0585		0.00404502	13.8011		0.00404502	13.1935		0.00404502	12.9872		0.00404502	12.9365
0.00693891	14.0103		0.00693891	14.0267		0.00693891	13.6113		0.00693891	12.8518		0.00693891	12.6194		0.00693891	12.5668
0.0098328	13.9909		0.0098328	13.9777		0.0098328	13.3893		0.0098328	12.4713		0.0098328	12.203		0.0098328	12.1428
0.0127267	13.9579		0.0127267	13.9113		0.0127267	13.1377		0.0127267	12.0452		0.0127267	11.729		0.0127267	11.6558
0.0156206	13.9127		0.0156206	13.8268		0.0156206	12.8567		0.0156206	11.5677		0.0156206	11.1931		0.0156206	11.1059
0.0185145	13.8568		0.0185145	13.728		0.0185145	12.5477		0.0185145	11.0398		0.0185145	10.5978		0.0185145	10.5024
0.0214084	13.7922		0.0214084	13.6182		0.0214084	12.2142		0.0214084	10.4658		0.0214084	9.95307		0.0214084	9.86151
0.0243023	13.7211		0.0243023	13.5007		0.0243023	11.8605		0.0243023	9.85147		0.0243023	9.27515		0.0243023	9.20422
0.0271961	13.6468		0.0271961	13.3788		0.0271961	11.4893		0.0271961	9.20614		0.0271961	8.5829		0.0271961	8.55084
0.03009	13.5722		0.03009	13.2551		0.03009	11.1046		0.03009	8.54061		0.03009	7.89558		0.03009	7.91844
0.0329839	13.4989		0.0329839	13.1331		0.0329839	10.7109		0.0329839	7.86603		0.0329839	7.23151		0.0329839	7.31951
0.0358778	13.4284		0.0358778	13.0139		0.0358778	10.3105		0.0358778	7.19399		0.0358778	6.60286		0.0358778	6.7622
0.0387717	13.3615		0.0387717	12.898		0.0387717	9.90416		0.0387717	6.53595		0.0387717	6.01493		0.0387717	6.25075
0.0416656	13.2982		0.0416656	12.7868		0.0416656	9.49355		0.0416656	5.90078		0.0416656	5.46947		0.0416656	5.7839
0.0445595	13.2396		0.0445595	12.6813		0.0445595	9.08029		0.0445595	5.29223		0.0445595	4.96229		0.0445595	5.35577
0.0474534	13.1865		0.0474534	12.5812		0.0474534	8.66564		0.0474534	4.70975		0.0474534	4.48469		0.0474534	4.9589
0.0503473	13.1387		0.0503473	12.4861		0.0503473	8.25028		0.0503473	4.1512		0.0503473	4.02782		0.0503473	4.58632
0.0532412	13.0954		0.0532412	12.3955		0.0532412	7.83452		0.0532412	3.61509		0.0532412	3.58462		0.0532412	4.23039
0.056135	13.057		0.056135	12.3089		0.056135	7.41913		0.056135	3.10081		0.056135	3.15026		0.056135	3.88313
0.0590289	13.0233		0.0590289	12.2257		0.0590289	7.00531		0.0590289	2.60996		0.0590289	2.7224		0.0590289	3.53818
0.0619228	12.9939		0.0619228	12.1453		0.0619228	6.59303		0.0619228	2.14843		0.0619228	2.30363		0.0619228	3.19071
0.0648167	12.9682		0.0648167	12.0673		0.0648167	6.18148		0.0648167	1.72286		0.0648167	1.90168		0.0648167	2.83802
0.0677106	12.9459		0.0677106	11.9912		0.0677106	5.77053		0.0677106	1.33465		0.0677106	1.52331		0.0677106	2.4813
0.0706045	12.9269		0.0706045	11.9165		0.0706045	5.35964		0.0706045	0.967275		0.0706045	1.1657		0.0706045	2.12605
0.0734984	12.9103		0.0734984	11.8433		0.0734984	4.94701		0.0734984	0.597091		0.0734984	0.806235		0.0734984	1.78024
0.0763923	12.896		0.0763923	11.7719		0.0763923	4.53098		0.0763923	0.21821		0.0763923	0.428132		0.0763923	1.44996
0.0792862	12.8837		0.0792862	11.7023		0.0792862	4.11053		0.0792862	-0.14465		0.0792862	0.0417427		0.0792862	1.13236
0.0821801	12.8733		0.0821801	11.6349		0.0821801	3.68479		0.0821801	-0.45122		0.0821801	-0.31727		0.0821801	0.809969
0.085074	12.8642		0.085074	11.5701		0.085074	3.25429		0.085074	-0.682781		0.085074	-0.610217		0.085074	0.468519
0.085074	12.8642		0.085074	11.5701		0.085074	3.25429		0.085074	-0.682781		0.085074	-0.610217		0.085074	0.468519
0.0879678	12.856		0.0879678	11.5083		0.0879678	2.82303		0.0879678	-0.849766		0.0879678	-0.82983		0.0879678	0.113925
0.0908617	12.8485		0.0908617	11.449		0.0908617	2.39942		0.0908617	-0.974655		0.0908617	-0.993571		0.0908617	-0.226556
0.0937556	12.8412		0.0937556	11.3921		0.0937556	1.9947		0.0937556	-1.07528		0.0937556	-1.12308		0.0937556	-0.519163
0.0966495	12.8342		0.0966495	11.3373		0.0966495	1.6176		0.0966495	-1.16186		0.0966495	-1.23224		0.0966495	-0.74839
0.0995434	12.8275		0.0995434	11.2847		0.0995434	1.26792		0.0995434	-1.24005		0.0995434	-1.32825		0.0995434	-0.921612
0.102437	12.8215		0.102437	11.234		0.102437	0.932326		0.102437	-1.31294		0.102437	-1.41499		0.102437	-1.05715
0.105331	12.8161		0.105331	11.1853		0.105331	0.596906		0.105331	-1.38246		0.105331	-1.49471		0.105331	-1.1695
0.108225	12.8115		0.108225	11.1383		0.108225	0.261273		0.108225	-1.44993		0.108225	-1.56882		0.108225	-1.26659
0.111119	12.8078		0.111119	11.0932		0.111119	-0.0618025		0.111119	-1.51623		0.111119	-1.63834		0.111119	-1.35275
0.114013	12.8049		0.114013	11.0499		0.114013	-0.351662		0.114013	-1.58186		0.114013	-1.704		0.114013	-1.43033
0.116907	12.8028		0.116907	11.0081		0.116907	-0.591308		0.116907	-1.64701		0.116907	-1.76628		0.116907	-1.50076
0.119801	12.8012		0.119801	10.9673		0.119801	-0.774656		0.119801	-1.7117		0.119801	-1.82549		0.119801	-1.56507
0.122695	12.8004		0.122695	10.9276		0.122695	-0.906334		0.122695	-1.77582		0.122695	-1.88182		0.122695	-1.62398
0.125588	12.8003		0.125588	10.8892		0.125588	-0.998737		0.125588	-1.8392		0.125588	-1.93527		0.125588	-1.67804
0.128482	12.8011		0.128482	10.852		0.128482	-1.06589		0.128482	-1.90159		0.128482	-1.98574		0.128482	-1.72754
0.131376	12.8024		0.131376	10.816		0.131376	-1.11845		0.131376	-1.96268		0.131376	-2.03313		0.131376	-1.77269
0.13427	12.8043		0.13427	10.7811		0.13427	-1.16321		0.13427	-2.02215		0.13427	-2.07734		0.13427	-1.81369
0.137164	12.8068		0.137164	10.7472		0.137164	-1.20451		0.137164	-2.07969		0.137164	-2.11828		0.137164	-1.85071
0.140058	12.8099		0.140058	10.7142		0.140058	-1.24517		0.140058	-2.13501		0.140058	-2.15588		0.140058	-1.88383
0.142952	12.8135		0.142952	10.6819		0.142952	-1.28696		0.142952	-2.18785		0.142952	-2.19007		0.142952	-1.9131
0.145846	12.8175		0.145846	10.6504		0.145846	-1.33072		0.145846	-2.23798		0.145846	-2.22082		0.145846	-1.93858
0.14874	12.8217		0.14874	10.6196		0.14874	-1.3768		0.14874	-2.28519		0.14874	-2.2481		0.14874	-1.96034
0.151633	12.8264		0.151633	10.5894		0.151633	-1.42525		0.151633	-2.32934		0.151633	-2.27191		0.151633	-1.97847
0.154527	12.8314		0.154527	10.5597		0.154527	-1.47603		0.154527	-2.37029		0.154527	-2.29227		0.154527	-1.99306
0.157421	12.8366		0.157421	10.5307		0.157421	-1.52903		0.157421	-2.40793		0.157421	-2.30922		0.157421	-2.00425
0.160315	12.8417		0.160315	10.5021		0.160315	-1.58402		0.160315	-2.44216		0.160315	-2.32282		0.160315	-2.01205
0.163209	12.8468		0.163209	10.4742		0.163209	-1.64069		0.163209	-2.47291		0.163209	-2.33309		0.163209	-2.01669
0.166103	12.8524		0.166103	10.4469		0.166103	-1.69869		0.166103	-2.50016		0.166103	-2.34007		0.166103	-2.01848
0.166103	12.8524		0.166103	10.4469		0.166103	-1.69869		0.166103	-2.50016		0.166103	-2.34007		0.166103	-2.01848
0.168997	12.8584		0.168997	10.4202		0.168997	-1.75761		0.168997	-2.52387		0.168997	-2.34402		0.168997	-2.017
0.171891	12.8643		0.171891	10.394		0.171891	-1.81701		0.171891	-2.54404		0.171891	-2.34496		0.171891	-2.01281
0.174785	12.8702		0.174785	10.3684		0.174785	-1.87644		0.174785	-2.56071		0.174785	-2.34267		0.174785	-2.00621
0.177678	12.8761		0.177678	10.3434		0.177678	-1.93548		0.177678	-2.57388		0.177678	-2.33759		0.177678	-1.99692
0.180572	12.882		0.180572	10.3188		0.180572	-1.9937		0.180572	-2.58356		0.180572	-2.32991		0.180572	-1.9853
0.183466	12.8881		0.183466	10.2944		0.183466	-2.0507		0.183466	-2.58991		0.183466	-2.31948		0.183466	-1.97143
0.18636	12.8943		0.18636	10.2705		0.18636	-2.10611		0.18636	-2.59304		0.18636	-2.30654		0.18636	-1.95546
0.189254	12.9005		0.189254	10.2469		0.189254	-2.15957		0.189254	-2.59282		0.189254	-2.29117		0.189254	-1.93751
0.192148	12.9068		0.192148	10.2237		0.192148	-2.21078		0.192148	-2.58936		0.192148	-2.27352		0.192148	-1.91773
0.195042	12.913		0.195042	10.2008		0.195042	-2.25947		0.195042	-2.58296		0.195042	-2.2537		0.195042	-1.89623
0.197936	12.9194		0.197936	10.1781		0.197936	-2.30538		0.197936	-2.57361		0.197936	-2.23183		0.197936	-1.87315
0.20083	12.926		0.20083	10.1555		0.20083	-2.34833		0.20083	-2.56141		0.20083	-2.20803		0.20083	-1.84861
0.203723	12.9327		0.203723	10.1333		0.203723	-2.38815		0.203723	-2.54649		0.203723	-2.18243		0.203723	-1.82272
0.206617	12.9392		0.206617	10.1115		0.206617	-2.42469		0.206617	-2.52896		0.206617	-2.15515		0.206617	-1.79561
0.209511	12.9455		0.209511	10.0899		0.209511	-2.45785		0.209511	-2.50895		0.209511	-2.12631		0.209511	-1.76738
0.212405	12.9518		0.212405	10.0684		0.212405	-2.48754		0.212405	-2.48658		0.212405	-2.09602		0.212405	-1.73815
0.215299	12.958		0.215299	10.0473		0.215299	-2.51371		0.215299	-2.46198		0.215299	-2.0644		0.215299	-1.70802
0.215299	12.958		0.215299	10.0473		0.215299	-2.51371		0.215299	-2.46198		0.215299	-2.0644		0.215299	-1.70802
0.218193	12.9641		0.218193	10.0263		0.218193	-2.53631		0.218193	-2.43527		0.218193	-2.03157		0.218193	-1.67709
0.221087	12.97		0.221087	10.0054		0.221087	-2.55531		0.221087	-2.40659		0.221087	-1.99763		0.221087	-1.64546
0.223981	12.9755		0.223981	9.98453		0.223981	-2.57068		0.223981	-2.37607		0.223981	-1.96269		0.223981	-1.61322
0.226875	12.9808		0.226875	9.96359		0.226875	-2.58248		0.226875	-2.34381		0.226875	-1.92686		0.226875	-1.58046
0.229768	12.9862		0.229768	9.94258		0.229768	-2.59068		0.229768	-2.30996		0.229768	-1.89024		0.229768	-1.54727
0.232662	12.9917		0.232662	9.92149		0.232662	-2.59548		0.232662	-2.27464		0.232662	-1.85292		0.232662	-1.51372
0.235556	12.9972		0.235556	9.90027		0.235556	-2.59697		0.235556	-2.23796		0.235556	-1.81499		0.235556	-1.4799
0.23845	13.0026		0.23845	9.87891		0.23845	-2.59473		0.23845	-2.20004		0.23845	-1.77655		0.23845	-1.44588
0.241344	13.0078		0.241344	9.85742		0.241344	-2.58925		0.241344	-2.16099		0.241344	-1.73769		0.241344	-1.41172
0.244238	13.0129		0.244238	9.83588		0.244238	-2.58077		0.244238	-2.12094		0.244238	-1.69847		0.244238	-1.37748
0.247132	13.018		0.247132	9.81432		0.247132	-2.56904		0.247132	-2.07998		0.247132	-1.65899		0.247132	-1.34324
0.250026	13.0231		0.250026	9.79275		0.250026	-2.55435		0.250026	-2.03822		0.250026	-1.61932		0.250026	-1.30904
0.25292	13.028		0.25292	9.77115		0.25292	-2.53677		0.25292	-1.99575		0.25292	-1.57952		0.25292	-1.27494
0.255814	13.0326		0.255814	9.74947		0.255814	-2.51643		0.255814	-1.95269		0.255814	-1.53966		0.255814	-1.24099
0.258707	13.0369		0.258707	9.72758		0.258707	-2.49347		0.258707	-1.90911		0.258707	-1.49981		0.258707	-1.20722
0.261601	13.0409		0.261601	9.70548		0.261601	-2.46801		0.261601	-1.86511		0.261601	-1.46002		0.261601	-1.1737
0.264495	13.0446		0.264495	9.68324		0.264495	-2.44018		0.264495	-1.82076		0.264495	-1.42035		0.264495	-1.14045
0.267389	13.048		0.267389	9.66097		0.267389	-2.41014		0.267389	-1.77617		0.267389	-1.38085		0.267389	-1.10751
0.270283	13.0511		0.270283	9.63868		0.270283	-2.378		0.270283	-1.73139		0.270283	-1.34157		0.270283	-1.07491
0.273177	13.0539		0.273177	9.61623		0.273177	-2.34392		0.273177	-1.6865		0.273177	-1.30256		0.273177	-1.04268
0.276071	13.0565		0.276071	9.59348		0.276071	-2.30802		0.276071	-1.64157		0.276071	-1.26386		0.276071	-1.01086
0.278965	13.0587		0.278965	9.57051		0.278965	-2.27045		0.278965	-1.59666		0.278965	-1.2255		0.278965	-0.979453
0.281859	13.0604		0.281859	9.54755		0.281859	-2.23134		0.281859	-1.55184		0.281859	-1.18753		0.281859	-0.948494
0.284752	13.0616		0.284752	9.52463		0.284752	-2.19082		0.284752	-1.50717		0.284752	-1.14997		0.284752	-0.917998
0.287646	13.0619		0.287646	9.50151		0.287646	-2.14903		0.287646	-1.46269		0.287646	-1.11286		0.287646	-0.887981
0.29054	13.0614		0.29054	9.47807		0.29054	-2.10608		0.29054	-1.41846		0.29054	-1.07622		0.29054	-0.858459
0.293434	13.0602		0.293434	9.45429		0.293434	-2.0621		0.293434	-1.37453		0.293434	-1.04008		0.293434	-0.829442
0.296328	13.0583		0.296328	9.43014		0.296328	-2.01722		0.296328	-1.33093		0.296328	-1.00446		0.296328	-0.800941
0.299222	13.0558		0.299222	9.40574		0.299222	-1.97153		0.299222	-1.28772		0.299222	-0.969382		0.299222	-0.772963
0.302116	13.0527		0.302116	9.38116		0.302116	-1.92516		0.302116	-1.24493		0.302116	-0.934862		0.302116	-0.745515
0.30501	13.0489		0.30501	9.35629		0.30501	-1.87822		0.30501	-1.20258		0.30501	-0.900914		0.30501	-0.7186
0.307904	13.0444		0.307904	9.33074		0.307904	-1.83079		0.307904	-1.16072		0.307904	-0.867553		0.307904	-0.692221
0.310797	13.0387		0.310797	9.3042		0.310797	-1.78298		0.310797	-1.11938		0.310797	-0.834789		0.310797	-0.666379
0.313691	13.0319		0.313691	9.2767		0.313691	-1.73488		0.313691	-1.07858		0.313691	-0.802632		0.313691	-0.641074
0.313691	13.0319		0.313691	9.2767		0.313691	-1.73488		0.313691	-1.07858		0.313691	-0.802632		0.313691	-0.641074
0.316585	13.0242		0.316585	9.24845		0.316585	-1.68658		0.316585	-1.03834		0.316585	-0.771089		0.316585	-0.616303
0.319479	13.0156		0.319479	9.21948		0.319479	-1.63816		0.319479	-0.998685		0.319479	-0.740166		0.319479	-0.592064
0.322373	13.0063		0.322373	9.18987		0.322373	-1.5897		0.322373	-0.959639		0.322373	-0.709866		0.322373	-0.568353
0.325267	12.9961		0.325267	9.15985		0.325267	-1.54126		0.325267	-0.921216		0.325267	-0.680192		0.325267	-0.545163
0.328161	12.9851		0.328161	9.12957		0.328161	-1.49293		0.328161	-0.883433		0.328161	-0.651145		0.328161	-0.52249
0.331055	12.9732		0.331055	9.09892		0.331055	-1.44476		0.331055	-0.846301		0.331055	-0.622725		0.331055	-0.500325
0.333949	12.9606		0.333949	9.06777		0.333949	-1.39682		0.333949	-0.809832		0.333949	-0.594929		0.333949	-0.478662
0.336842	12.9473		0.336842	9.03615		0.336842	-1.34915		0.336842	-0.774035		0.336842	-0.567754		0.336842	-0.45749
0.339736	12.9331		0.339736	9.00416		0.339736	-1.30182		0.339736	-0.738919		0.339736	-0.541196		0.339736	-0.436801
0.34263	12.9181		0.34263	8.97149		0.34263	-1.25486		0.34263	-0.704489		0.34263	-0.51525		0.34263	-0.416586
0.345524	12.9021		0.345524	8.93788		0.345524	-1.20834		0.345524	-0.670749		0.345524	-0.489909		0.345524	-0.396833
0.348418	12.8854		0.348418	8.90367		0.348418	-1.16227		0.348418	-0.637703		0.348418	-0.465167		0.348418	-0.377531
0.351312	12.8678		0.351312	8.86935		0.351312	-1.11671		0.351312	-0.605351		0.351312	-0.441014		0.351312	-0.358671
0.354206	12.849		0.354206	8.83505		0.354206	-1.07168		0.354206	-0.573695		0.354206	-0.417443		0.354206	-0.34024
0.3571	12.8294		0.3571	8.80069		0.3571	-1.02722		0.3571	-0.542733		0.3571	-0.394443		0.3571	-0.322227
0.359994	12.8094		0.359994	8.76606		0.359994	-0.983362		0.359994	-0.512462		0.359994	-0.372004		0.359994	-0.304619
0.362887	12.7882		0.362887	8.73083		0.362887	-0.940118		0.362887	-0.482879		0.362887	-0.350117		0.362887	-0.287406
0.365781	12.765		0.365781	8.69478		0.365781	-0.897518		0.365781	-0.453981		0.365781	-0.328769		0.365781	-0.270575
0.368675	12.7399		0.368675	8.65802		0.368675	-0.855578		0.368675	-0.42576		0.368675	-0.307947		0.368675	-0.254114
0.371569	12.7133		0.371569	8.62094		0.371569	-0.814318		0.371569	-0.398209		0.371569	-0.287641		0.371569	-0.238009
0.374463	12.6852		0.374463	8.58361		0.374463	-0.773751		0.374463	-0.371322		0.374463	-0.267836		0.374463	-0.22225
0.377357	12.6556		0.377357	8.54561		0.377357	-0.733891		0.377357	-0.34509		0.377357	-0.248521		0.377357	-0.206823
0.380251	12.6239		0.380251	8.50691		0.380251	-0.69475		0.380251	-0.319506		0.380251	-0.229683		0.380251	-0.191719
0.383145	12.5902		0.383145	8.46814		0.383145	-0.656337		0.383145	-0.294561		0.383145	-0.21131		0.383145	-0.176926
0.386039	12.5545		0.386039	8.42943		0.386039	-0.618658		0.386039	-0.270244		0.386039	-0.193388		0.386039	-0.162433
0.388932	12.517		0.388932	8.39001		0.388932	-0.58172		0.388932	-0.246545		0.388932	-0.175905		0.388932	-0.148228
0.391826	12.4776		0.391826	8.34933		0.391826	-0.545524		0.391826	-0.223451		0.391826	-0.158846		0.391826	-0.1343
0.39472	12.4361		0.39472	8.30785		0.39472	-0.510074		0.39472	-0.200952		0.39472	-0.142198		0.39472	-0.120638
0.397614	12.3922		0.397614	8.26627		0.397614	-0.475369		0.397614	-0.179035		0.397614	-0.125948		0.397614	-0.107232
0.400508	12.3458		0.400508	8.22449		0.400508	-0.441411		0.400508	-0.157688		0.400508	-0.110083		0.400508	-0.0940716
0.403402	12.2961		0.403402	8.18187		0.403402	-0.408196		0.403402	-0.136898		0.403402	-0.0945892		0.403402	-0.0811472
0.403402	12.2961		0.403402	8.18187		0.403402	-0.408196		0.403402	-0.136898		0.403402	-0.0945892		0.403402	-0.0811472
0.406296	12.2432		0.406296	8.13834		0.406296	-0.375722		0.406296	-0.116653		0.406296	-0.0794547		0.406296	-0.068449
0.40919	12.1878		0.40919	8.09415		0.40919	-0.343985		0.40919	-0.09694		0.40919	-0.0646664		0.40919	-0.0559677
0.412084	12.1305		0.412084	8.04903		0.412084	-0.31298		0.412084	-0.0777447		0.412084	-0.0502119		0.412084	-0.0436944
0.414977	12.0711		0.414977	8.00269		0.414977	-0.282701		0.414977	-0.0590542		0.414977	-0.0360787		0.414977	-0.0316204
0.417871	12.0089		0.417871	7.95482		0.417871	-0.253141		0.417871	-0.040855		0.417871	-0.0222548		0.417871	-0.0197372
0.420765	11.9438		0.420765	7.90453		0.420765	-0.224292		0.420765	-0.0231336		0.420765	-0.00872831		0.420765	-0.00803682
0.423659	11.8758		0.423659	7.85201		0.423659	-0.196147		0.423659	-0.0058764		0.423659	0.00451232		0.423659	0.00348851
0.426553	11.8057		0.426553	7.79849		0.426553	-0.168696		0.426553	0.0109301		0.426553	0.0174785		0.426553	0.0148463
0.429447	11.7334		0.429447	7.74443		0.429447	-0.141929		0.429447	0.0272996		0.429447	0.0301811		0.429447	0.0260437
0.432341	11.6578		0.432341	7.68973		0.432341	-0.115836		0.432341	0.0432454		0.432341	0.042631		0.432341	0.0370877
0.435235	11.5787		0.435235	7.63399		0.435235	-0.0904075		0.435235	0.0587808		0.435235	0.0548387		0.435235	0.0479847
0.438129	11.495		0.438129	7.57737		0.438129	-0.0656313		0.438129	0.0739191		0.438129	0.0668142		0.438129	0.0587412
0.441023	11.4066		0.441023	7.52054		0.441023	-0.0414962		0.441023	0.0886733		0.441023	0.0785675		0.441023	0.0693632
0.443916	11.3154		0.443916	7.46349		0.443916	-0.0179903		0.443916	0.103056		0.443916	0.0901081		0.443916	0.0798565
0.44681	11.2225		0.44681	7.40627		0.44681	0.00489867		0.44681	0.117081		0.44681	0.101445		0.44681	0.0902266
0.449704	11.1276		0.449704	7.3491		0.449704	0.0271832		0.449704	0.13076		0.449704	0.112588		0.449704	0.100479
0.452598	11.0305		0.452598	7.29159		0.452598	0.048876		0.452598	0.144106		0.452598	0.123544		0.452598	0.110619
0.455492	10.9315		0.455492	7.23342		0.455492	0.06999		0.455492	0.15713		0.455492	0.134324		0.455492	0.120651
0.458386	10.8311		0.458386	7.17501		0.458386	0.0905383		0.458386	0.169845		0.458386	0.144934		0.458386	0.13058
0.46128	10.73		0.46128	7.11652		0.46128	0.110534		0.46128	0.182262		0.46128	0.155382		0.46128	0.14041
0.464174	10.628		0.464174	7.05768		0.464174	0.12999		0.464174	0.194393		0.464174	0.165677		0.464174	0.150146
0.467068	10.5254		0.467068	6.99832		0.467068	0.148921		0.467068	0.20625		0.467068	0.175824		0.467068	0.159793
0.469961	10.4224		0.469961	6.93843		0.469961	0.167339		0.469961	0.217842		0.469961	0.185832		0.469961	0.169353
0.472855	10.3188		0.472855	6.87805		0.472855	0.185257		0.472855	0.22918		0.472855	0.195707		0.472855	0.178831
0.475749	10.2151		0.475749	6.8175		0.475749	0.20269		0.475749	0.240276		0.475749	0.205456		0.475749	0.188231
0.478643	10.1113		0.478643	6.75702		0.478643	0.21965		0.478643	0.251138		0.478643	0.215084		0.478643	0.197555
0.481537	10.0074		0.481537	6.69651		0.481537	0.236151		0.481537	0.261777		0.481537	0.224598		0.481537	0.206809
0.484431	9.90369		0.484431	6.63564		0.484431	0.252205		0.484431	0.272203		0.484431	0.234004		0.484431	0.215994
0.487325	9.79997		0.487325	6.57438		0.487325	0.267827		0.487325	0.282425		0.487325	0.243307		0.487325	0.225115
0.490219	9.69594		0.490219	6.51298		0.490219	0.283028		0.490219	0.292451		0.490219	0.252513		0.490219	0.234174
0.493113	9.59194		0.493113	6.45156		0.493113	0.297822		0.493113	0.302292		0.493113	0.261627		0.493113	0.243174
0.496006	9.48809		0.496006	6.39011		0.496006	0.312222		0.496006	0.311954		0.496006	0.270654		0.496006	0.25212
0.4989	9.38449		0.4989	6.32846		0.4989	0.326239		0.4989	0.321447		0.4989	0.279599		0.4989	0.261013
0.501794	9.28133		0.501794	6.26646		0.501794	0.339887		0.501794	0.330779		0.501794	0.288467		0.501794	0.269857
0.504688	9.1785		0.504688	6.20415		0.504688	0.353177		0.504688	0.339958		0.504688	0.297262		0.504688	0.278654
0.507582	9.07603		0.507582	6.14169		0.507582	0.366121		0.507582	0.34899		0.507582	0.305989		0.507582	0.287408
0.510476	8.97406		0.510476	6.07922		0.510476	0.378732		0.510476	0.357885		0.510476	0.314652		0.510476	0.296121
0.51337	8.87265		0.51337	6.0169		0.51337	0.39102		0.51337	0.366648		0.51337	0.323256		0.51337	0.304796
0.516264	8.77184		0.516264	5.95478		0.516264	0.402998		0.516264	0.375287		0.516264	0.331805		0.516264	0.313437
0.519158	8.67141		0.519158	5.89286		0.519158	0.414678		0.519158	0.38381		0.519158	0.340304		0.519158	0.322047
0.522051	8.57131		0.522051	5.83115		0.522051	0.42607		0.522051	0.392223		0.522051	0.348757		0.522051	0.330628
0.524945	8.47159		0.524945	5.76949		0.524945	0.437184		0.524945	0.400532		0.524945	0.357166		0.524945	0.339184
0.524945	8.47159		0.524945	5.76949		0.524945	0.437184		0.524945	0.400532		0.524945	0.357166		0.524945	0.339184
0.527839	8.37217		0.527839	5.70778		0.527839	0.448032		0.527839	0.408744		0.527839	0.365537		0.527839	0.347717
0.530733	8.27302		0.530733	5.64607		0.530733	0.458622		0.530733	0.416864		0.530733	0.373873		0.530733	0.35623
0.533627	8.17427		0.533627	5.58445		0.533627	0.468967		0.533627	0.424899		0.533627	0.382178		0.533627	0.364727
0.536521	8.07603		0.536521	5.52298		0.536521	0.479076		0.536521	0.432854		0.536521	0.390456		0.536521	0.37321
0.539415	7.97838		0.539415	5.46174		0.539415	0.488958		0.539415	0.440736		0.539415	0.39871		0.539415	0.381683
0.542309	7.88142		0.542309	5.40077		0.542309	0.498624		0.542309	0.44855		0.542309	0.406945		0.542309	0.39015
0.545203	7.78523		0.545203	5.3401		0.545203	0.508083		0.545203	0.456303		0.545203	0.415165		0.545203	0.398613
0.548096	7.68979		0.548096	5.27974		0.548096	0.517344		0.548096	0.463999		0.548096	0.423373		0.548096	0.407076
0.55099	7.5951		0.55099	5.21974		0.55099	0.526416		0.55099	0.471644		0.55099	0.431573		0.55099	0.415543
0.553884	7.50116		0.553884	5.16015		0.553884	0.535309		0.553884	0.479244		0.553884	0.439771		0.553884	0.424017
0.556778	7.408		0.556778	5.10096		0.556778	0.544031		0.556778	0.486804		0.556778	0.447968		0.556778	0.432503
0.559672	7.31564		0.559672	5.04218		0.559672	0.552591		0.559672	0.494329		0.559672	0.456171		0.559672	0.441003
0.562566	7.22415		0.562566	4.98387		0.562566	0.560997		0.562566	0.501824		0.562566	0.464381		0.562566	0.449522
0.56546	7.13352		0.56546	4.92605		0.56546	0.569258		0.56546	0.509296		0.56546	0.472605		0.56546	0.458064
0.568354	7.0437		0.568354	4.86874		0.568354	0.577382		0.568354	0.516749		0.568354	0.480847		0.568354	0.466634
0.571248	6.95469		0.571248	4.81193		0.571248	0.585378		0.571248	0.524188		0.571248	0.48911		0.571248	0.475234
0.574142	6.86654		0.574142	4.7556		0.574142	0.593253		0.574142	0.53162		0.574142	0.4974		0.574142	0.48387
0.577035	6.77931		0.577035	4.69977		0.577035	0.601015		0.577035	0.539049		0.577035	0.50572		0.577035	0.492547
0.579929	6.69302		0.579929	4.64449		0.579929	0.608673		0.579929	0.546481		0.579929	0.514077		0.579929	0.501269
0.582823	6.6076		0.582823	4.5898		0.582823	0.616234		0.582823	0.553921		0.582823	0.522474		0.582823	0.51004
0.585717	6.523		0.585717	4.53567		0.585717	0.623706		0.585717	0.561376		0.585717	0.530916		0.585717	0.518868
0.588611	6.4392		0.588611	4.48209		0.588611	0.631098		0.588611	0.56885		0.588611	0.53941		0.588611	0.527759
0.591505	6.35628		0.591505	4.42904		0.591505	0.638416		0.591505	0.57635		0.591505	0.547959		0.591505	0.536718
0.594399	6.27435		0.594399	4.37655		0.594399	0.645669		0.594399	0.583882		0.594399	0.55657		0.594399	0.545752
0.597293	6.19338		0.597293	4.32463		0.597293	0.652864		0.597293	0.591451		0.597293	0.565249		0.597293	0.554867
0.600186	6.11328		0.600186	4.27335		0.600186	0.66001		0.600186	0.599065		0.600186	0.574002		0.600186	0.564068
0.60308	6.034		0.60308	4.2227		0.60308	0.667114		0.60308	0.606728		0.60308	0.582837		0.60308	0.573357
0.605974	5.95551		0.605974	4.17267		0.605974	0.674184		0.605974	0.614449		0.605974	0.591761		0.605974	0.58274
0.608868	5.87788		0.608868	4.12324		0.608868	0.681229		0.608868	0.622232		0.608868	0.600782		0.608868	0.592223
0.611762	5.80121		0.611762	4.07441		0.611762	0.688257		0.611762	0.630086		0.611762	0.609906		0.611762	0.601813
0.614656	5.72555		0.614656	4.02616		0.614656	0.695276		0.614656	0.638018		0.614656	0.619138		0.614656	0.611519
0.61755	5.65087		0.61755	3.9785		0.61755	0.702295		0.61755	0.646036		0.61755	0.628485		0.61755	0.62135
0.620444	5.57709		0.620444	3.93142		0.620444	0.709321		0.620444	0.654148		0.620444	0.63795		0.620444	0.631314
0.623338	5.50417		0.623338	3.88495		0.623338	0.716365		0.623338	0.662365		0.623338	0.647544		0.623338	0.641418
0.626231	5.4321		0.626231	3.83913		0.626231	0.723434		0.626231	0.670695		0.626231	0.657275		0.626231	0.651672
0.629125	5.36086		0.629125	3.79396		0.629125	0.73054		0.629125	0.679146		0.629125	0.667153		0.629125	0.662084
0.632019	5.29046		0.632019	3.74945		0.632019	0.737693		0.632019	0.687726		0.632019	0.677189		0.632019	0.672662
0.634913	5.22091		0.634913	3.70557		0.634913	0.744903		0.634913	0.696444		0.634913	0.687393		0.634913	0.683415
0.637807	5.15227		0.637807	3.66231		0.637807	0.752182		0.637807	0.705306		0.637807	0.697774		0.637807	0.694354
0.640701	5.08456		0.640701	3.61966		0.640701	0.759539		0.640701	0.714324		0.640701	0.708344		0.640701	0.705488
0.643595	5.01774		0.643595	3.57761		0.643595	0.766985		0.643595	0.723509		0.643595	0.719112		0.643595	0.716827
0.643595	5.01774		0.643595	3.57761		0.643595	0.766985		0.643595	0.723509		0.643595	0.719112		0.643595	0.716827
0.646489	4.95177		0.646489	3.53615		0.646489	0.77453		0.646489	0.732874		0.646489	0.730089		0.646489	0.728383
0.649383	4.88664		0.649383	3.4953		0.649383	0.782184		0.649383	0.742432		0.649383	0.741289		0.649383	0.740166
0.652277	4.82235		0.652277	3.45508		0.652277	0.789961		0.652277	0.752197		0.652277	0.752722		0.652277	0.752189
0.65517	4.75894		0.65517	3.4155		0.65517	0.797875		0.65517	0.76218		0.65517	0.764403		0.65517	0.764463
0.658064	4.6964		0.658064	3.37656		0.658064	0.80594		0.658064	0.772397		0.658064	0.776344		0.658064	0.777002
0.660958	4.63474		0.660958	3.33827		0.660958	0.814172		0.660958	0.78286		0.660958	0.78856		0.660958	0.789818
0.663852	4.57398		0.663852	3.30063		0.663852	0.822587		0.663852	0.793587		0.663852	0.801066		0.663852	0.802926
0.666746	4.51412		0.666746	3.26364		0.666746	0.831201		0.666746	0.804593		0.666746	0.813879		0.666746	0.81634
0.66964	4.45514		0.66964	3.22732		0.66964	0.840031		0.66964	0.815895		0.66964	0.827013		0.66964	0.830076
0.672534	4.39707		0.672534	3.19165		0.672534	0.849095		0.672534	0.827512		0.672534	0.840487		0.672534	0.844149
0.675428	4.33989		0.675428	3.15666		0.675428	0.858411		0.675428	0.839462		0.675428	0.854319		0.675428	0.858576
0.678322	4.28361		0.678322	3.12233		0.678322	0.868001		0.678322	0.851765		0.678322	0.868527		0.678322	0.873375
0.681215	4.22824		0.681215	3.08868		0.681215	0.877885		0.681215	0.864444		0.681215	0.883133		0.681215	0.888564
0.684109	4.17378		0.684109	3.05571		0.684109	0.888086		0.684109	0.877519		0.684109	0.898157		0.684109	0.904164
0.687003	4.12024		0.687003	3.02343		0.687003	0.898629		0.687003	0.891016		0.687003	0.913623		0.687003	0.920193
0.689897	4.06764		0.689897	2.99185		0.689897	0.90954		0.689897	0.90496		0.689897	0.929554		0.689897	0.936675
0.692791	4.01596		0.692791	2.96098		0.692791	0.920845		0.692791	0.919378		0.692791	0.945975		0.692791	0.953632
0.695685	3.96523		0.695685	2.93084		0.695685	0.932575		0.695685	0.934299		0.695685	0.962914		0.695685	0.971088
0.698579	3.91545		0.698579	2.90144		0.698579	0.94476		0.698579	0.949753		0.698579	0.980397		0.698579	0.989069
0.701473	3.86665		0.701473	2.87279		0.701473	0.957434		0.701473	0.965772		0.701473	0.998457		0.701473	1.0076
0.704367	3.81883		0.704367	2.84493		0.704367	0.970633		0.704367	0.982392		0.704367	1.01712		0.704367	1.02671
0.70726	3.77201		0.70726	2.81786		0.70726	0.984395		0.70726	0.999649		0.70726	1.03643		0.70726	1.04644
0.710154	3.72622		0.710154	2.79162		0.710154	0.998761		0.710154	1.01758		0.710154	1.05642		0.710154	1.0668
0.713048	3.68148		0.713048	2.76621		0.713048	1.01378		0.713048	1.03624		0.713048	1.07712		0.713048	1.08785
0.715942	3.63781		0.715942	2.74167		0.715942	1.02949		0.715942	1.05566		0.715942	1.09858		0.715942	1.10961
0.715942	3.63781		0.715942	2.74167		0.715942	1.02949		0.715942	1.05566		0.715942	1.09858		0.715942	1.10961
0.718836	3.59527		0.718836	2.71806		0.718836	1.04595		0.718836	1.07589		0.718836	1.12084		0.718836	1.13212
0.72173	3.55388		0.72173	2.69542		0.72173	1.06321		0.72173	1.09698		0.72173	1.14396		0.72173	1.15543
0.724624	3.51371		0.724624	2.67379		0.724624	1.08133		0.724624	1.119		0.724624	1.16797		0.724624	1.17958
0.727518	3.47479		0.727518	2.65322		0.727518	1.10038		0.727518	1.142		0.727518	1.19294		0.727518	1.20462
0.730412	3.43715		0.730412	2.63377		0.730412	1.12043		0.730412	1.16605		0.730412	1.21892		0.730412	1.23061
0.733305	3.40089		0.733305	2.61551		0.733305	1.14155		0.733305	1.19122		0.733305	1.24598		0.733305	1.25759
0.736199	3.3661		0.736199	2.5985		0.736199	1.16382		0.736199	1.21758		0.736199	1.27419		0.736199	1.28564
0.739093	3.33286		0.739093	2.58283		0.739093	1.18734		0.739093	1.24523		0.739093	1.30362		0.739093	1.31481
0.741987	3.30124		0.741987	2.5686		0.741987	1.21219		0.741987	1.27423		0.741987	1.33436		0.741987	1.34519
0.744881	3.27136		0.744881	2.5559		0.744881	1.23849		0.744881	1.30471		0.744881	1.36649		0.744881	1.37684
0.747775	3.24334		0.747775	2.54487		0.747775	1.26635		0.747775	1.33676		0.747775	1.40011		0.747775	1.40986
0.750669	3.21731		0.750669	2.53564		0.750669	1.2959		0.750669	1.37051		0.750669	1.43533		0.750669	1.44434
0.753563	3.19343		0.753563	2.52835		0.753563	1.32728		0.753563	1.40607		0.753563	1.47226		0.753563	1.48038
0.756457	3.17187		0.756457	2.52318		0.756457	1.36063		0.756457	1.44361		0.756457	1.51103		0.756457	1.51809
0.75935	3.15285		0.75935	2.52033		0.75935	1.39614		0.75935	1.48326		0.75935	1.55178		0.75935	1.5576
0.762244	3.13658		0.762244	2.52006		0.762244	1.43398		0.762244	1.52521		0.762244	1.59467		0.762244	1.59905
0.765138	3.12334		0.765138	2.52262		0.765138	1.47436		0.765138	1.56964		0.765138	1.63987		0.765138	1.64259
0.768032	3.11341		0.768032	2.52829		0.768032	1.51751		0.768032	1.61677		0.768032	1.68756		0.768032	1.68837
0.770926	3.10713		0.770926	2.53742		0.770926	1.5637		0.770926	1.66684		0.770926	1.73796		0.770926	1.7366
0.77382	3.10495		0.77382	2.5504		0.77382	1.6132		0.77382	1.7201		0.77382	1.79129		0.77382	1.78746
0.776714	3.10729		0.776714	2.56766		0.776714	1.66633		0.776714	1.77683		0.776714	1.8478		0.776714	1.84117
0.779608	3.11463		0.779608	2.58969		0.779608	1.72345		0.779608	1.83736		0.779608	1.90777		0.779608	1.89798
0.782502	3.12756		0.782502	2.61707		0.782502	1.78495		0.782502	1.90202		0.782502	1.97149		0.782502	1.95816
0.785396	3.14672		0.785396	2.6504		0.785396	1.85128		0.785396	1.97121		0.785396	2.03931		0.785396	2.022
0.788289	3.17282		0.788289	2.69038		0.788289	1.92291		0.788289	2.04536		0.788289	2.1116		0.788289	2.08984
0.791183	3.20667		0.791183	2.73773		0.791183	2.00041		0.791183	2.12492		0.791183	2.18876		0.791183	2.16204
0.794077	3.24912		0.794077	2.79323		0.794077	2.08438		0.794077	2.21043		0.794077	2.27127		0.794077	2.23901
0.796971	3.30109		0.796971	2.85775		0.796971	2.17549		0.796971	2.30247		0.796971	2.35961		0.796971	2.32119
0.799865	3.36358		0.799865	2.93219		0.799865	2.27451		0.799865	2.4017		0.799865	2.45437		0.799865	2.4091
0.799865	3.36358		0.799865	2.93219		0.799865	2.27451		0.799865	2.4017		0.799865	2.45437		0.799865	2.4091
0.802759	3.43764		0.802759	3.01754		0.802759	2.38227		0.802759	2.50884		0.802759	2.55618		0.802759	2.5033
0.805653	3.52441		0.805653	3.1149		0.805653	2.49976		0.805653	2.62472		0.805653	2.66575		0.805653	2.60442
0.808547	3.62514		0.808547	3.22547		0.808547	2.62803		0.808547	2.75027		0.808547	2.7839		0.808547	2.71318
0.811441	3.74119		0.811441	3.35062		0.811441	2.7683		0.811441	2.88653		0.811441	2.91152		0.811441	2.83038
0.814334	3.87408		0.814334	3.49187		0.814334	2.92194		0.814334	3.03466		0.814334	3.04963		0.814334	2.9569
0.817228	4.0255		0.817228	3.65097		0.817228	3.09046		0.817228	3.19598		0.817228	3.19936		0.817228	3.09376
0.820122	4.19738		0.820122	3.8299		0.820122	3.27559		0.820122	3.37193		0.820122	3.36195		0.820122	3.24203
0.823016	4.39186		0.823016	4.03087		0.823016	3.47921		0.823016	3.56412		0.823016	3.53878		0.823016	3.40295
0.82591	4.61134		0.82591	4.25635		0.82591	3.70342		0.82591	3.77433		0.82591	3.73139		0.82591	3.57785
0.828804	4.8585		0.828804	4.50905		0.828804	3.95051		0.828804	4.00449		0.828804	3.9414		0.828804	3.76815
0.831698	5.1362		0.831698	4.79192		0.831698	4.22298		0.831698	4.25667		0.831698	4.17058		0.831698	3.9754
0.834592	5.44753		0.834592	5.10811		0.834592	4.52347		0.834592	4.53306		0.834592	4.42078		0.834592	4.2012
0.837486	5.79571		0.837486	5.46091		0.837486	4.85477		0.837486	4.83593		0.837486	4.69388		0.837486	4.44717
0.840379	6.18395		0.840379	5.85363		0.840379	5.2197		0.840379	5.16756		0.840379	4.99176		0.840379	4.71491
0.843273	6.61539		0.843273	6.28951		0.843273	5.62105		0.843273	5.53013		0.843273	5.31616		0.843273	5.0059
0.846167	7.09282		0.846167	6.77152		0.846167	6.0614		0.846167	5.92556		0.846167	5.66858		0.846167	5.32138
0.849061	7.61854		0.849061	7.30213		0.849061	6.54291		0.849061	6.35539		0.849061	6.05013		0.849061	5.66218
0.851955	8.19402		0.851955	7.88306		0.851955	7.06713		0.851955	6.8205		0.851955	6.46129		0.851955	6.0286
0.854849	8.81958		0.854849	8.5149		0.854849	7.63459		0.854849	7.32083		0.854849	6.90169		0.854849	6.42013
0.857743	9.49436		0.857743	9.19709		0.857743	8.24484		0.857743	7.85538		0.857743	7.37007		0.857743	6.83545
0.860637	10.2153		0.860637	9.92683		0.860637	8.8953		0.860637	8.42127		0.860637	7.86354		0.860637	7.27178
0.863531	10.9792		0.863531	10.7014		0.863531	9.5835		0.863531	9.01561		0.863531	8.3791		0.863531	7.72624
0.866424	11.7767		0.866424	11.5112		0.866424	10.3004		0.866424	9.6301		0.866424	8.90926		0.866424	8.19205
0.869318	12.6116		0.869318	12.361		0.869318	11.0506		0.869318	10.2676		0.869318	9.45588		0.869318	8.67051
0.872212	13.4521		0.872212	13.2173		0.872212	11.8012		0.872212	10.9009		0.872212	9.99607		0.872212	9.14184
0.875106	14.3857		0.875106	14.1722		0.875106	12.6382		0.875106	11.601		0.875106	10.5896		0.875106	9.65787
0.878	14.9087		0.878	14.709		0.878	13.1112		0.878	11.995		0.878	10.9226		0.878	9.94676

## Sheet: Radial temp distribution
SN 0			SN 0.2			SN 0.4			SN 0.6			SN 0.8			SN 1
Radial distance	temperature		Radial distance	temperature		Radial distance	temperature		Radial distance	temperature		Radial distance	temperature		Radial distance	temperature
0	956.757		0	969.495		0	941.448		0	960.988		0	982.664		0	1002.15
0.005	956.252		0.005	968.827		0.005	940.669		0.005	960.184		0.005	981.837		0.005	1001.28
0.01	954.768		0.01	966.87		0.01	938.356		0.01	957.803		0.01	979.391		0.01	998.732
0.015	952.295		0.015	963.613		0.015	934.425		0.015	953.767		0.015	975.255		0.015	994.427
0.02	948.784		0.02	959.009		0.02	928.688		0.02	947.898		0.02	969.262		0.02	988.21
0.025	944.195		0.025	953.029		0.025	920.953		0.025	940.021		0.025	961.251		0.025	979.931
0.03	938.387		0.03	945.533		0.03	910.917		0.03	929.846		0.03	950.941		0.03	969.318
0.035	930.879		0.035	936.005		0.035	897.854		0.035	916.671		0.035	937.641		0.035	955.675
0.04	918.843		0.04	921.284		0.04	877.981		0.04	896.829		0.04	917.714		0.04	935.26
0.045	778.337		0.045	775.28		0.045	739.823		0.045	751.161		0.045	762.457		0.045	770.474

## Sheet: n2o distribution
SN 0			SN 0.2			SN 0.4			SN 0.6			SN 0.8			SN 1
Axial distance	n2o mass fraction		Axial distance	n2o mass fraction		Axial distance	n2o mass fraction		Axial distance	n2o mass fraction		Axial distance	n2o mass fraction		Axial distance	n2o mass fraction
0.00115113	1.78364e-10		0.00115113	1.73091e-10		0.00115113	1.40002e-10		0.00115113	1.83872e-11		0.00115113	1.2433e-11		0.00115113	8.90232e-12
0.00404502	2.47943e-10		0.00404502	2.39191e-10		0.00404502	1.73888e-10		0.00404502	2.49671e-11		0.00404502	1.40749e-11		0.00404502	9.92489e-12
0.00693891	3.26232e-10		0.00693891	3.13215e-10		0.00693891	2.01359e-10		0.00693891	3.22705e-11		0.00693891	1.52652e-11		0.00693891	1.05282e-11
0.0098328	4.15879e-10		0.0098328	3.96937e-10		0.0098328	2.20542e-10		0.0098328	3.9239e-11		0.0098328	1.61252e-11		0.0098328	1.06721e-11
0.0127267	5.15284e-10		0.0127267	4.87245e-10		0.0127267	2.31422e-10		0.0127267	4.49126e-11		0.0127267	1.67015e-11		0.0127267	1.04591e-11
0.0156206	6.20966e-10		0.0156206	5.79188e-10		0.0156206	2.36298e-10		0.0156206	4.89405e-11		0.0156206	1.69561e-11		0.0156206	9.96988e-12
0.0185145	7.27807e-10		0.0185145	6.66623e-10		0.0185145	2.38521e-10		0.0185145	5.13245e-11		0.0185145	1.68923e-11		0.0185145	9.23714e-12
0.0214084	8.29624e-10		0.0214084	7.43109e-10		0.0214084	2.40851e-10		0.0214084	5.22071e-11		0.0214084	1.65125e-11		0.0214084	8.4249e-12
0.0243023	9.20652e-10		0.0243023	8.03819e-10		0.0243023	2.44345e-10		0.0243023	5.17928e-11		0.0243023	1.57986e-11		0.0243023	7.65311e-12
0.0271961	9.96536e-10		0.0271961	8.46515e-10		0.0271961	2.48672e-10		0.0271961	5.05416e-11		0.0271961	1.47827e-11		0.0271961	6.97832e-12
0.03009	1.05453e-09		0.03009	8.7104e-10		0.03009	2.52956e-10		0.03009	4.86076e-11		0.03009	1.3668e-11		0.03009	6.51679e-12
0.0329839	1.09357e-09		0.0329839	8.78845e-10		0.0329839	2.56363e-10		0.0329839	4.61628e-11		0.0329839	1.26545e-11		0.0329839	6.36032e-12
0.0358778	1.11452e-09		0.0358778	8.72756e-10		0.0358778	2.58551e-10		0.0358778	4.33916e-11		0.0358778	1.19389e-11		0.0358778	6.5832e-12
0.0387717	1.11933e-09		0.0387717	8.55871e-10		0.0387717	2.59433e-10		0.0387717	4.02632e-11		0.0387717	1.17444e-11		0.0387717	7.27245e-12
0.0416656	1.11044e-09		0.0416656	8.31275e-10		0.0416656	2.58938e-10		0.0416656	3.71562e-11		0.0416656	1.23963e-11		0.0416656	8.46761e-12
0.0445595	1.09112e-09		0.0445595	8.02102e-10		0.0445595	2.57178e-10		0.0445595	3.47365e-11		0.0445595	1.4398e-11		0.0445595	1.0225e-11
0.0474534	1.06397e-09		0.0474534	7.71314e-10		0.0474534	2.54346e-10		0.0474534	3.41951e-11		0.0474534	1.86661e-11		0.0474534	1.2643e-11
0.0503473	1.03081e-09		0.0503473	7.41703e-10		0.0503473	2.50594e-10		0.0503473	3.85214e-11		0.0503473	2.73383e-11		0.0503473	1.58694e-11
0.0532412	9.93813e-10		0.0532412	7.15829e-10		0.0532412	2.46092e-10		0.0532412	5.59351e-11		0.0532412	4.57323e-11		0.0532412	2.02403e-11
0.056135	9.55499e-10		0.056135	6.95871e-10		0.056135	2.4102e-10		0.056135	1.07247e-10		0.056135	8.64196e-11		0.056135	2.66335e-11
0.0590289	9.18018e-10		0.0590289	6.83292e-10		0.0590289	2.3573e-10		0.0590289	2.43462e-10		0.0590289	1.80972e-10		0.0590289	3.74015e-11
0.0619228	8.82894e-10		0.0619228	6.78569e-10		0.0619228	2.3009e-10		0.0619228	5.47963e-10		0.0619228	3.97682e-10		0.0619228	5.85521e-11
0.0648167	8.51794e-10		0.0648167	6.81327e-10		0.0648167	2.23696e-10		0.0648167	1.1563e-09		0.0648167	8.37433e-10		0.0648167	1.04365e-10
0.0677106	8.26118e-10		0.0677106	6.90761e-10		0.0677106	2.16653e-10		0.0677106	2.26102e-09		0.0677106	1.63571e-09		0.0677106	2.07336e-10
0.0706045	8.06769e-10		0.0706045	7.05891e-10		0.0706045	2.09123e-10		0.0706045	4.31546e-09		0.0706045	3.11899e-09		0.0706045	4.31032e-10
0.0734984	7.94394e-10		0.0734984	7.25682e-10		0.0734984	2.01211e-10		0.0734984	7.97553e-09		0.0734984	5.81942e-09		0.0734984	8.80851e-10
0.0763923	7.89206e-10		0.0763923	7.48803e-10		0.0763923	1.93045e-10		0.0763923	1.36616e-08		0.0763923	1.02761e-08		0.0763923	1.70288e-09
0.0792862	7.90906e-10		0.0792862	7.73723e-10		0.0792862	1.85006e-10		0.0792862	2.11501e-08		0.0792862	1.67184e-08		0.0792862	3.06525e-09
0.0821801	7.99052e-10		0.0821801	7.9909e-10		0.0821801	1.78711e-10		0.0821801	2.94625e-08		0.0821801	2.4708e-08		0.0821801	5.33136e-09
0.085074	8.13302e-10		0.085074	8.23702e-10		0.085074	1.79398e-10		0.085074	3.71466e-08		0.085074	3.29942e-08		0.085074	8.92493e-09
0.085074	8.13302e-10		0.085074	8.23702e-10		0.085074	1.79398e-10		0.085074	3.71466e-08		0.085074	3.29942e-08		0.085074	8.92493e-09
0.0879678	8.33245e-10		0.0879678	8.46571e-10		0.0879678	2.0198e-10		0.0879678	3.94516e-08		0.0879678	3.69742e-08		0.0879678	1.39896e-08
0.0908617	8.58323e-10		0.0908617	8.66962e-10		0.0908617	2.82707e-10		0.0908617	3.5904e-08		0.0908617	3.4837e-08		0.0908617	2.02479e-08
0.0937556	8.87853e-10		0.0937556	8.84456e-10		0.0937556	5.01103e-10		0.0937556	3.11848e-08		0.0937556	3.04591e-08		0.0937556	2.69581e-08
0.0966495	9.21013e-10		0.0966495	8.98891e-10		0.0966495	9.91389e-10		0.0966495	2.68922e-08		0.0966495	2.63247e-08		0.0966495	3.28487e-08
0.0995434	9.569e-10		0.0995434	9.10348e-10		0.0995434	1.94666e-09		0.0995434	2.33392e-08		0.0995434	2.29785e-08		0.0995434	3.4643e-08
0.102437	9.94549e-10		0.102437	9.19107e-10		0.102437	3.66924e-09		0.102437	2.03777e-08		0.102437	2.0338e-08		0.102437	3.23454e-08
0.105331	1.03294e-09		0.105331	9.25571e-10		0.105331	6.52592e-09		0.105331	1.79071e-08		0.105331	1.82678e-08		0.105331	2.91531e-08
0.108225	1.07108e-09		0.108225	9.30347e-10		0.108225	1.08098e-08		0.108225	1.58599e-08		0.108225	1.66247e-08		0.108225	2.61691e-08
0.111119	1.10868e-09		0.111119	9.33924e-10		0.111119	1.66191e-08		0.111119	1.41676e-08		0.111119	1.53136e-08		0.111119	2.37508e-08
0.114013	1.14432e-09		0.114013	9.36831e-10		0.114013	2.37598e-08		0.114013	1.27771e-08		0.114013	1.42788e-08		0.114013	2.18138e-08
0.116907	1.17718e-09		0.116907	9.39775e-10		0.116907	3.17754e-08		0.116907	1.16346e-08		0.116907	1.34613e-08		0.116907	2.02704e-08
0.119801	1.20693e-09		0.119801	9.43363e-10		0.119801	4.00047e-08		0.119801	1.06981e-08		0.119801	1.28165e-08		0.119801	1.9043e-08
0.122695	1.23286e-09		0.122695	9.48243e-10		0.122695	4.62671e-08		0.122695	9.93381e-09		0.122695	1.23098e-08		0.122695	1.8065e-08
0.125588	1.25531e-09		0.125588	9.54793e-10		0.125588	4.76883e-08		0.125588	9.31104e-09		0.125588	1.19128e-08		0.125588	1.72935e-08
0.128482	1.27426e-09		0.128482	9.63512e-10		0.128482	4.46965e-08		0.128482	8.80418e-09		0.128482	1.16027e-08		0.128482	1.66834e-08
0.131376	1.28977e-09		0.131376	9.74626e-10		0.131376	3.98239e-08		0.131376	8.39439e-09		0.131376	1.13608e-08		0.131376	1.61981e-08
0.13427	1.30193e-09		0.13427	9.8816e-10		0.13427	3.45871e-08		0.13427	8.06558e-09		0.13427	1.1172e-08		0.13427	1.58129e-08
0.137164	1.31128e-09		0.137164	1.00443e-09		0.137164	2.96641e-08		0.137164	7.80389e-09		0.137164	1.10245e-08		0.137164	1.55091e-08
0.140058	1.31801e-09		0.140058	1.02383e-09		0.140058	2.53526e-08		0.140058	7.59788e-09		0.140058	1.09087e-08		0.140058	1.52682e-08
0.142952	1.32212e-09		0.142952	1.04594e-09		0.142952	2.1728e-08		0.142952	7.43768e-09		0.142952	1.0817e-08		0.142952	1.5075e-08
0.145846	1.32394e-09		0.145846	1.07025e-09		0.145846	1.87064e-08		0.145846	7.31427e-09		0.145846	1.07432e-08		0.145846	1.49175e-08
0.14874	1.3238e-09		0.14874	1.09698e-09		0.14874	1.61978e-08		0.14874	7.22001e-09		0.14874	1.06828e-08		0.14874	1.47864e-08
0.151633	1.32221e-09		0.151633	1.1263e-09		0.151633	1.41214e-08		0.151633	7.14811e-09		0.151633	1.06321e-08		0.151633	1.46748e-08
0.154527	1.31952e-09		0.154527	1.15733e-09		0.154527	1.24014e-08		0.154527	7.09309e-09		0.154527	1.05885e-08		0.154527	1.4577e-08
0.157421	1.31611e-09		0.157421	1.18939e-09		0.157421	1.09746e-08		0.157421	7.05097e-09		0.157421	1.055e-08		0.157421	1.44891e-08
0.160315	1.31231e-09		0.160315	1.22258e-09		0.160315	9.79475e-09		0.160315	7.01859e-09		0.160315	1.05151e-08		0.160315	1.4408e-08
0.163209	1.30844e-09		0.163209	1.25649e-09		0.163209	8.82787e-09		0.163209	6.99347e-09		0.163209	1.04827e-08		0.163209	1.43313e-08
0.166103	1.30484e-09		0.166103	1.29088e-09		0.166103	8.03858e-09		0.166103	6.97367e-09		0.166103	1.0452e-08		0.166103	1.42576e-08
0.166103	1.30484e-09		0.166103	1.29088e-09		0.166103	8.03858e-09		0.166103	6.97367e-09		0.166103	1.0452e-08		0.166103	1.42576e-08
0.168997	1.30176e-09		0.168997	1.32605e-09		0.168997	7.39172e-09		0.168997	6.95724e-09		0.168997	1.04224e-08		0.168997	1.41875e-08
0.171891	1.29941e-09		0.171891	1.36146e-09		0.171891	6.86109e-09		0.171891	6.94271e-09		0.171891	1.03936e-08		0.171891	1.4122e-08
0.174785	1.29804e-09		0.174785	1.39658e-09		0.174785	6.42852e-09		0.174785	6.92949e-09		0.174785	1.03653e-08		0.174785	1.40611e-08
0.177678	1.29787e-09		0.177678	1.43193e-09		0.177678	6.07759e-09		0.177678	6.91714e-09		0.177678	1.03372e-08		0.177678	1.4005e-08
0.180572	1.29903e-09		0.180572	1.46787e-09		0.180572	5.79395e-09		0.180572	6.90535e-09		0.180572	1.03093e-08		0.180572	1.39527e-08
0.183466	1.30194e-09		0.183466	1.50359e-09		0.183466	5.56591e-09		0.183466	6.89395e-09		0.183466	1.02813e-08		0.183466	1.39035e-08
0.18636	1.30707e-09		0.18636	1.53818e-09		0.18636	5.38325e-09		0.18636	6.88283e-09		0.18636	1.02532e-08		0.18636	1.38571e-08
0.189254	1.31416e-09		0.189254	1.57173e-09		0.189254	5.23729e-09		0.189254	6.87199e-09		0.189254	1.0225e-08		0.189254	1.38131e-08
0.192148	1.32303e-09		0.192148	1.6041e-09		0.192148	5.12064e-09		0.192148	6.86143e-09		0.192148	1.01966e-08		0.192148	1.37713e-08
0.195042	1.33377e-09		0.195042	1.6354e-09		0.195042	5.02807e-09		0.195042	6.85116e-09		0.195042	1.01679e-08		0.195042	1.37315e-08
0.197936	1.34611e-09		0.197936	1.66522e-09		0.197936	4.95513e-09		0.197936	6.84038e-09		0.197936	1.01389e-08		0.197936	1.36935e-08
0.20083	1.36001e-09		0.20083	1.69327e-09		0.20083	4.89812e-09		0.20083	6.82846e-09		0.20083	1.01095e-08		0.20083	1.36573e-08
0.203723	1.37589e-09		0.203723	1.72e-09		0.203723	4.85392e-09		0.203723	6.81564e-09		0.203723	1.00803e-08		0.203723	1.36227e-08
0.206617	1.39364e-09		0.206617	1.74586e-09		0.206617	4.81914e-09		0.206617	6.80202e-09		0.206617	1.00517e-08		0.206617	1.35898e-08
0.209511	1.41304e-09		0.209511	1.77134e-09		0.209511	4.79097e-09		0.209511	6.78764e-09		0.209511	1.00236e-08		0.209511	1.35586e-08
0.212405	1.43436e-09		0.212405	1.79685e-09		0.212405	4.7679e-09		0.212405	6.77251e-09		0.212405	9.99618e-09		0.212405	1.35293e-08
0.215299	1.45759e-09		0.215299	1.82277e-09		0.215299	4.74874e-09		0.215299	6.75663e-09		0.215299	9.96946e-09		0.215299	1.35024e-08
0.215299	1.45759e-09		0.215299	1.82277e-09		0.215299	4.74874e-09		0.215299	6.75663e-09		0.215299	9.96946e-09		0.215299	1.35024e-08
0.218193	1.48288e-09		0.218193	1.84978e-09		0.218193	4.73234e-09		0.218193	6.7401e-09		0.218193	9.94298e-09		0.218193	1.34761e-08
0.221087	1.51033e-09		0.221087	1.87869e-09		0.221087	4.71765e-09		0.221087	6.72308e-09		0.221087	9.91599e-09		0.221087	1.34474e-08
0.223981	1.54e-09		0.223981	1.90966e-09		0.223981	4.70403e-09		0.223981	6.70563e-09		0.223981	9.88817e-09		0.223981	1.3415e-08
0.226875	1.57239e-09		0.226875	1.94337e-09		0.226875	4.69103e-09		0.226875	6.68777e-09		0.226875	9.85944e-09		0.226875	1.33782e-08
0.229768	1.60734e-09		0.229768	1.98021e-09		0.229768	4.67838e-09		0.229768	6.66949e-09		0.229768	9.82986e-09		0.229768	1.33371e-08
0.232662	1.64422e-09		0.232662	2.02005e-09		0.232662	4.66592e-09		0.232662	6.65081e-09		0.232662	9.79952e-09		0.232662	1.32931e-08
0.235556	1.68304e-09		0.235556	2.06345e-09		0.235556	4.65351e-09		0.235556	6.63171e-09		0.235556	9.76848e-09		0.235556	1.32477e-08
0.23845	1.72439e-09		0.23845	2.11075e-09		0.23845	4.64107e-09		0.23845	6.61221e-09		0.23845	9.7367e-09		0.23845	1.32009e-08
0.241344	1.7679e-09		0.241344	2.16232e-09		0.241344	4.62852e-09		0.241344	6.59232e-09		0.241344	9.70426e-09		0.241344	1.3153e-08
0.244238	1.81328e-09		0.244238	2.2185e-09		0.244238	4.61578e-09		0.244238	6.57207e-09		0.244238	9.67122e-09		0.244238	1.31043e-08
0.247132	1.86063e-09		0.247132	2.27956e-09		0.247132	4.60296e-09		0.247132	6.55149e-09		0.247132	9.63765e-09		0.247132	1.30548e-08
0.250026	1.90964e-09		0.250026	2.34589e-09		0.250026	4.59027e-09		0.250026	6.53061e-09		0.250026	9.6036e-09		0.250026	1.30047e-08
0.25292	1.96051e-09		0.25292	2.41766e-09		0.25292	4.57774e-09		0.25292	6.50946e-09		0.25292	9.5691e-09		0.25292	1.29543e-08
0.255814	2.01333e-09		0.255814	2.49528e-09		0.255814	4.56533e-09		0.255814	6.48807e-09		0.255814	9.5342e-09		0.255814	1.29036e-08
0.258707	2.06814e-09		0.258707	2.57969e-09		0.258707	4.55303e-09		0.258707	6.46648e-09		0.258707	9.49889e-09		0.258707	1.28528e-08
0.261601	2.12489e-09		0.261601	2.67177e-09		0.261601	4.54082e-09		0.261601	6.44473e-09		0.261601	9.4632e-09		0.261601	1.28021e-08
0.264495	2.1838e-09		0.264495	2.77231e-09		0.264495	4.52868e-09		0.264495	6.42285e-09		0.264495	9.42711e-09		0.264495	1.27517e-08
0.267389	2.24488e-09		0.267389	2.88216e-09		0.267389	4.51662e-09		0.267389	6.40089e-09		0.267389	9.39061e-09		0.267389	1.27015e-08
0.270283	2.30789e-09		0.270283	3.00194e-09		0.270283	4.50462e-09		0.270283	6.3789e-09		0.270283	9.35396e-09		0.270283	1.26518e-08
0.273177	2.37304e-09		0.273177	3.13265e-09		0.273177	4.49269e-09		0.273177	6.35693e-09		0.273177	9.31744e-09		0.273177	1.26025e-08
0.276071	2.44074e-09		0.276071	3.27528e-09		0.276071	4.48082e-09		0.276071	6.33504e-09		0.276071	9.28099e-09		0.276071	1.25535e-08
0.278965	2.5114e-09		0.278965	3.43027e-09		0.278965	4.46902e-09		0.278965	6.31329e-09		0.278965	9.24462e-09		0.278965	1.25048e-08
0.281859	2.58549e-09		0.281859	3.59746e-09		0.281859	4.45729e-09		0.281859	6.29126e-09		0.281859	9.20831e-09		0.281859	1.24559e-08
0.284752	2.66353e-09		0.284752	3.77651e-09		0.284752	4.44563e-09		0.284752	6.26857e-09		0.284752	9.17208e-09		0.284752	1.24065e-08
0.287646	2.74608e-09		0.287646	3.9679e-09		0.287646	4.43404e-09		0.287646	6.24531e-09		0.287646	9.13593e-09		0.287646	1.23567e-08
0.29054	2.83411e-09		0.29054	4.17194e-09		0.29054	4.42252e-09		0.29054	6.22149e-09		0.29054	9.09985e-09		0.29054	1.23061e-08
0.293434	2.9284e-09		0.293434	4.38861e-09		0.293434	4.41108e-09		0.293434	6.19716e-09		0.293434	9.06384e-09		0.293434	1.22548e-08
0.296328	3.02945e-09		0.296328	4.61844e-09		0.296328	4.39971e-09		0.296328	6.17231e-09		0.296328	9.02791e-09		0.296328	1.22025e-08
0.299222	3.13811e-09		0.299222	4.86199e-09		0.299222	4.38841e-09		0.299222	6.14698e-09		0.299222	8.99206e-09		0.299222	1.21494e-08
0.302116	3.25538e-09		0.302116	5.11978e-09		0.302116	4.3772e-09		0.302116	6.12119e-09		0.302116	8.95626e-09		0.302116	1.20953e-08
0.30501	3.38236e-09		0.30501	5.39221e-09		0.30501	4.36606e-09		0.30501	6.09496e-09		0.30501	8.92053e-09		0.30501	1.20404e-08
0.307904	3.5202e-09		0.307904	5.67967e-09		0.307904	4.355e-09		0.307904	6.06832e-09		0.307904	8.88484e-09		0.307904	1.19846e-08
0.310797	3.67012e-09		0.310797	5.98247e-09		0.310797	4.34403e-09		0.310797	6.0413e-09		0.310797	8.84918e-09		0.310797	1.19283e-08
0.313691	3.8336e-09		0.313691	6.30087e-09		0.313691	4.33311e-09		0.313691	6.01393e-09		0.313691	8.81355e-09		0.313691	1.18716e-08
0.313691	3.8336e-09		0.313691	6.30087e-09		0.313691	4.33311e-09		0.313691	6.01393e-09		0.313691	8.81355e-09		0.313691	1.18716e-08
0.316585	4.01223e-09		0.316585	6.63586e-09		0.316585	4.32184e-09		0.316585	5.98719e-09		0.316585	8.77743e-09		0.316585	1.18131e-08
0.319479	4.2073e-09		0.319479	6.98806e-09		0.319479	4.30992e-09		0.319479	5.9619e-09		0.319479	8.74036e-09		0.319479	1.17519e-08
0.322373	4.42006e-09		0.322373	7.35843e-09		0.322373	4.29747e-09		0.322373	5.93785e-09		0.322373	8.70243e-09		0.322373	1.16887e-08
0.325267	4.6514e-09		0.325267	7.74758e-09		0.325267	4.2846e-09		0.325267	5.91491e-09		0.325267	8.66394e-09		0.325267	1.16244e-08
0.328161	4.9027e-09		0.328161	8.15523e-09		0.328161	4.2714e-09		0.328161	5.89297e-09		0.328161	8.62521e-09		0.328161	1.15592e-08
0.331055	5.17562e-09		0.331055	8.58263e-09		0.331055	4.25792e-09		0.331055	5.87196e-09		0.331055	8.58627e-09		0.331055	1.14932e-08
0.333949	5.47103e-09		0.333949	9.03251e-09		0.333949	4.24421e-09		0.333949	5.85184e-09		0.333949	8.54716e-09		0.333949	1.14266e-08
0.336842	5.78976e-09		0.336842	9.5082e-09		0.336842	4.23029e-09		0.336842	5.83258e-09		0.336842	8.50792e-09		0.336842	1.13594e-08
0.339736	6.13288e-09		0.339736	1.00127e-08		0.339736	4.21618e-09		0.339736	5.81418e-09		0.339736	8.46857e-09		0.339736	1.12917e-08
0.34263	6.50197e-09		0.34263	1.05495e-08		0.34263	4.20201e-09		0.34263	5.79667e-09		0.34263	8.42912e-09		0.34263	1.12236e-08
0.345524	6.89872e-09		0.345524	1.11231e-08		0.345524	4.18788e-09		0.345524	5.7801e-09		0.345524	8.38959e-09		0.345524	1.11552e-08
0.348418	7.32382e-09		0.348418	1.17369e-08		0.348418	4.17381e-09		0.348418	5.76453e-09		0.348418	8.34999e-09		0.348418	1.10864e-08
0.351312	7.77806e-09		0.351312	1.23917e-08		0.351312	4.15978e-09		0.351312	5.74923e-09		0.351312	8.31032e-09		0.351312	1.10174e-08
0.354206	8.2629e-09		0.354206	1.30882e-08		0.354206	4.14581e-09		0.354206	5.73351e-09		0.354206	8.27058e-09		0.354206	1.09481e-08
0.3571	8.77978e-09		0.3571	1.38285e-08		0.3571	4.1319e-09		0.3571	5.71744e-09		0.3571	8.23075e-09		0.3571	1.08786e-08
0.359994	9.33049e-09		0.359994	1.46152e-08		0.359994	4.11806e-09		0.359994	5.70108e-09		0.359994	8.19084e-09		0.359994	1.08095e-08
0.362887	9.91764e-09		0.362887	1.54514e-08		0.362887	4.1043e-09		0.362887	5.68444e-09		0.362887	8.15081e-09		0.362887	1.07417e-08
0.365781	1.05447e-08		0.365781	1.63421e-08		0.365781	4.09061e-09		0.365781	5.66753e-09		0.365781	8.11066e-09		0.365781	1.06753e-08
0.368675	1.12155e-08		0.368675	1.72929e-08		0.368675	4.07702e-09		0.368675	5.65035e-09		0.368675	8.07036e-09		0.368675	1.06103e-08
0.371569	1.1934e-08		0.371569	1.83082e-08		0.371569	4.06352e-09		0.371569	5.63291e-09		0.371569	8.02987e-09		0.371569	1.05469e-08
0.374463	1.27045e-08		0.374463	1.93953e-08		0.374463	4.05013e-09		0.374463	5.6152e-09		0.374463	7.98951e-09		0.374463	1.04851e-08
0.377357	1.35321e-08		0.377357	2.05658e-08		0.377357	4.03686e-09		0.377357	5.59724e-09		0.377357	7.94956e-09		0.377357	1.04251e-08
0.380251	1.44218e-08		0.380251	2.18298e-08		0.380251	4.02372e-09		0.380251	5.57902e-09		0.380251	7.91002e-09		0.380251	1.03671e-08
0.383145	1.53782e-08		0.383145	2.31918e-08		0.383145	4.01068e-09		0.383145	5.56054e-09		0.383145	7.87089e-09		0.383145	1.03109e-08
0.386039	1.64051e-08		0.386039	2.46553e-08		0.386039	3.99769e-09		0.386039	5.5418e-09		0.386039	7.83218e-09		0.386039	1.02568e-08
0.388932	1.75056e-08		0.388932	2.62306e-08		0.388932	3.98476e-09		0.388932	5.52279e-09		0.388932	7.79389e-09		0.388932	1.02048e-08
0.391826	1.86834e-08		0.391826	2.79335e-08		0.391826	3.97189e-09		0.391826	5.50349e-09		0.391826	7.75602e-09		0.391826	1.01549e-08
0.39472	1.99412e-08		0.39472	2.9793e-08		0.39472	3.95906e-09		0.39472	5.48387e-09		0.39472	7.71858e-09		0.39472	1.01073e-08
0.397614	2.12805e-08		0.397614	3.18454e-08		0.397614	3.94627e-09		0.397614	5.4639e-09		0.397614	7.68158e-09		0.397614	1.0061e-08
0.400508	2.27066e-08		0.400508	3.41315e-08		0.400508	3.93351e-09		0.400508	5.44354e-09		0.400508	7.64502e-09		0.400508	1.0015e-08
0.403402	2.42323e-08		0.403402	3.66961e-08		0.403402	3.92073e-09		0.403402	5.42273e-09		0.403402	7.60893e-09		0.403402	9.96913e-09
0.403402	2.42323e-08		0.403402	3.66961e-08		0.403402	3.92073e-09		0.403402	5.42273e-09		0.403402	7.60893e-09		0.403402	9.96913e-09
0.406296	2.58744e-08		0.406296	3.95809e-08		0.406296	3.90794e-09		0.406296	5.40167e-09		0.406296	7.57299e-09		0.406296	9.92291e-09
0.40919	2.76455e-08		0.40919	4.29078e-08		0.40919	3.89513e-09		0.40919	5.38056e-09		0.40919	7.53688e-09		0.40919	9.87561e-09
0.412084	2.95543e-08		0.412084	4.68428e-08		0.412084	3.88227e-09		0.412084	5.35934e-09		0.412084	7.50059e-09		0.412084	9.82705e-09
0.414977	3.16144e-08		0.414977	5.16026e-08		0.414977	3.86937e-09		0.414977	5.33794e-09		0.414977	7.46415e-09		0.414977	9.77719e-09
0.417871	3.38412e-08		0.417871	5.74898e-08		0.417871	3.85641e-09		0.417871	5.31637e-09		0.417871	7.42757e-09		0.417871	9.72601e-09
0.420765	3.62618e-08		0.420765	6.46411e-08		0.420765	3.84341e-09		0.420765	5.29461e-09		0.420765	7.39077e-09		0.420765	9.67356e-09
0.423659	3.89563e-08		0.423659	7.23416e-08		0.423659	3.83034e-09		0.423659	5.27266e-09		0.423659	7.35374e-09		0.423659	9.61987e-09
0.426553	4.20016e-08		0.426553	7.9981e-08		0.426553	3.81721e-09		0.426553	5.25054e-09		0.426553	7.31649e-09		0.426553	9.56505e-09
0.429447	4.55003e-08		0.429447	8.72118e-08		0.429447	3.80401e-09		0.429447	5.22825e-09		0.429447	7.27906e-09		0.429447	9.50918e-09
0.432341	4.96747e-08		0.432341	9.36317e-08		0.432341	3.79076e-09		0.432341	5.20582e-09		0.432341	7.24151e-09		0.432341	9.45236e-09
0.435235	5.48743e-08		0.435235	9.92211e-08		0.435235	3.77745e-09		0.435235	5.18326e-09		0.435235	7.20388e-09		0.435235	9.39468e-09
0.438129	6.12021e-08		0.438129	1.03903e-07		0.438129	3.7641e-09		0.438129	5.16059e-09		0.438129	7.16622e-09		0.438129	9.33629e-09
0.441023	6.81323e-08		0.441023	1.07696e-07		0.441023	3.75069e-09		0.441023	5.13784e-09		0.441023	7.12859e-09		0.441023	9.27729e-09
0.443916	7.4976e-08		0.443916	1.10587e-07		0.443916	3.73725e-09		0.443916	5.11501e-09		0.443916	7.09101e-09		0.443916	9.21783e-09
0.44681	8.1329e-08		0.44681	1.12623e-07		0.44681	3.72377e-09		0.44681	5.09213e-09		0.44681	7.05356e-09		0.44681	9.15802e-09
0.449704	8.6963e-08		0.449704	1.13988e-07		0.449704	3.71024e-09		0.449704	5.0692e-09		0.449704	7.01626e-09		0.449704	9.09799e-09
0.452598	9.17446e-08		0.452598	1.14556e-07		0.452598	3.69669e-09		0.452598	5.04624e-09		0.452598	6.97917e-09		0.452598	9.03783e-09
0.455492	9.56109e-08		0.455492	1.1438e-07		0.455492	3.6831e-09		0.455492	5.02325e-09		0.455492	6.94234e-09		0.455492	8.97767e-09
0.458386	9.85275e-08		0.458386	1.13753e-07		0.458386	3.66948e-09		0.458386	5.00026e-09		0.458386	6.90582e-09		0.458386	8.9176e-09
0.46128	1.0058e-07		0.46128	1.12693e-07		0.46128	3.65583e-09		0.46128	4.97725e-09		0.46128	6.86967e-09		0.46128	8.8577e-09
0.464174	1.01856e-07		0.464174	1.11144e-07		0.464174	3.64216e-09		0.464174	4.95425e-09		0.464174	6.83375e-09		0.464174	8.79805e-09
0.467068	1.0231e-07		0.467068	1.09164e-07		0.467068	3.62847e-09		0.467068	4.93126e-09		0.467068	6.79786e-09		0.467068	8.73874e-09
0.469961	1.02119e-07		0.469961	1.06839e-07		0.469961	3.61477e-09		0.469961	4.90829e-09		0.469961	6.762e-09		0.469961	8.67973e-09
0.472855	1.01448e-07		0.472855	1.04211e-07		0.472855	3.60104e-09		0.472855	4.88539e-09		0.472855	6.72619e-09		0.472855	8.62098e-09
0.475749	1.00301e-07		0.475749	1.01391e-07		0.475749	3.5873e-09		0.475749	4.86255e-09		0.475749	6.69042e-09		0.475749	8.56254e-09
0.478643	9.87022e-08		0.478643	9.84454e-08		0.478643	3.57356e-09		0.478643	4.83978e-09		0.478643	6.65471e-09		0.478643	8.50444e-09
0.481537	9.67031e-08		0.481537	9.54074e-08		0.481537	3.5598e-09		0.481537	4.8171e-09		0.481537	6.61906e-09		0.481537	8.44669e-09
0.484431	9.44991e-08		0.484431	9.22471e-08		0.484431	3.54604e-09		0.484431	4.79452e-09		0.484431	6.58348e-09		0.484431	8.3893e-09
0.487325	9.20633e-08		0.487325	8.89809e-08		0.487325	3.53227e-09		0.487325	4.77204e-09		0.487325	6.54799e-09		0.487325	8.33228e-09
0.490219	8.93358e-08		0.490219	8.56923e-08		0.490219	3.5185e-09		0.490219	4.74969e-09		0.490219	6.51258e-09		0.490219	8.27561e-09
0.493113	8.64615e-08		0.493113	8.24172e-08		0.493113	3.50473e-09		0.493113	4.72745e-09		0.493113	6.47726e-09		0.493113	8.21928e-09
0.496006	8.34734e-08		0.496006	7.91714e-08		0.496006	3.49098e-09		0.496006	4.70536e-09		0.496006	6.44205e-09		0.496006	8.16325e-09
0.4989	8.03997e-08		0.4989	7.59529e-08		0.4989	3.47727e-09		0.4989	4.68341e-09		0.4989	6.40695e-09		0.4989	8.10751e-09
0.501794	7.72934e-08		0.501794	7.27699e-08		0.501794	3.46363e-09		0.501794	4.66161e-09		0.501794	6.37195e-09		0.501794	8.05201e-09
0.504688	7.41589e-08		0.504688	6.96427e-08		0.504688	3.45005e-09		0.504688	4.63998e-09		0.504688	6.33709e-09		0.504688	7.99719e-09
0.507582	7.1041e-08		0.507582	6.65796e-08		0.507582	3.43656e-09		0.507582	4.61853e-09		0.507582	6.30234e-09		0.507582	7.94355e-09
0.510476	6.79662e-08		0.510476	6.35974e-08		0.510476	3.42317e-09		0.510476	4.59727e-09		0.510476	6.26774e-09		0.510476	7.89113e-09
0.51337	6.49482e-08		0.51337	6.07026e-08		0.51337	3.40988e-09		0.51337	4.57622e-09		0.51337	6.23331e-09		0.51337	7.84e-09
0.516264	6.20125e-08		0.516264	5.79047e-08		0.516264	3.3967e-09		0.516264	4.5554e-09		0.516264	6.19905e-09		0.516264	7.79024e-09
0.519158	5.91493e-08		0.519158	5.52164e-08		0.519158	3.38367e-09		0.519158	4.53481e-09		0.519158	6.16496e-09		0.519158	7.74199e-09
0.522051	5.63522e-08		0.522051	5.26375e-08		0.522051	3.37079e-09		0.522051	4.51448e-09		0.522051	6.13106e-09		0.522051	7.69542e-09
0.524945	5.3647e-08		0.524945	5.01686e-08		0.524945	3.35812e-09		0.524945	4.49442e-09		0.524945	6.09733e-09		0.524945	7.65078e-09
0.524945	5.3647e-08		0.524945	5.01686e-08		0.524945	3.35812e-09		0.524945	4.49442e-09		0.524945	6.09733e-09		0.524945	7.65078e-09
0.527839	5.10388e-08		0.527839	4.78109e-08		0.527839	3.34557e-09		0.527839	4.4745e-09		0.527839	6.06382e-09		0.527839	7.6073e-09
0.530733	4.85181e-08		0.530733	4.55575e-08		0.530733	3.33306e-09		0.530733	4.45456e-09		0.530733	6.03057e-09		0.530733	7.56405e-09
0.533627	4.60949e-08		0.533627	4.34079e-08		0.533627	3.32059e-09		0.533627	4.4346e-09		0.533627	5.99758e-09		0.533627	7.52097e-09
0.536521	4.37877e-08		0.536521	4.13589e-08		0.536521	3.30816e-09		0.536521	4.41461e-09		0.536521	5.96487e-09		0.536521	7.47796e-09
0.539415	4.16062e-08		0.539415	3.94085e-08		0.539415	3.29577e-09		0.539415	4.39461e-09		0.539415	5.93246e-09		0.539415	7.43494e-09
0.542309	3.95339e-08		0.542309	3.75558e-08		0.542309	3.28341e-09		0.542309	4.37459e-09		0.542309	5.90036e-09		0.542309	7.39195e-09
0.545203	3.75557e-08		0.545203	3.57981e-08		0.545203	3.27107e-09		0.545203	4.35456e-09		0.545203	5.86859e-09		0.545203	7.34911e-09
0.548096	3.5671e-08		0.548096	3.41328e-08		0.548096	3.25876e-09		0.548096	4.33452e-09		0.548096	5.83715e-09		0.548096	7.30637e-09
0.55099	3.38762e-08		0.55099	3.25465e-08		0.55099	3.24648e-09		0.55099	4.31448e-09		0.55099	5.80608e-09		0.55099	7.26368e-09
0.553884	3.21696e-08		0.553884	3.10349e-08		0.553884	3.23423e-09		0.553884	4.29444e-09		0.553884	5.77527e-09		0.553884	7.22104e-09
0.556778	3.05464e-08		0.556778	2.96049e-08		0.556778	3.22201e-09		0.556778	4.27439e-09		0.556778	5.74465e-09		0.556778	7.17842e-09
0.559672	2.90033e-08		0.559672	2.82546e-08		0.559672	3.20982e-09		0.559672	4.25435e-09		0.559672	5.7142e-09		0.559672	7.1358e-09
0.562566	2.75308e-08		0.562566	2.6979e-08		0.562566	3.19767e-09		0.562566	4.23431e-09		0.562566	5.68392e-09		0.562566	7.09319e-09
0.56546	2.61295e-08		0.56546	2.57699e-08		0.56546	3.18557e-09		0.56546	4.21427e-09		0.56546	5.65382e-09		0.56546	7.05058e-09
0.568354	2.48089e-08		0.568354	2.46204e-08		0.568354	3.17347e-09		0.568354	4.19425e-09		0.568354	5.62389e-09		0.568354	7.00795e-09
0.571248	2.35679e-08		0.571248	2.35306e-08		0.571248	3.16129e-09		0.571248	4.17423e-09		0.571248	5.59413e-09		0.571248	6.9653e-09
0.574142	2.24066e-08		0.574142	2.25006e-08		0.574142	3.14905e-09		0.574142	4.15422e-09		0.574142	5.56454e-09		0.574142	6.92263e-09
0.577035	2.13149e-08		0.577035	2.15319e-08		0.577035	3.13673e-09		0.577035	4.13422e-09		0.577035	5.53513e-09		0.577035	6.87993e-09
0.579929	2.02785e-08		0.579929	2.06088e-08		0.579929	3.12434e-09		0.579929	4.11423e-09		0.579929	5.50589e-09		0.579929	6.83734e-09
0.582823	1.92993e-08		0.582823	1.97203e-08		0.582823	3.11186e-09		0.582823	4.09429e-09		0.582823	5.47683e-09		0.582823	6.79503e-09
0.585717	1.8381e-08		0.585717	1.88742e-08		0.585717	3.0993e-09		0.585717	4.07445e-09		0.585717	5.44796e-09		0.585717	6.75303e-09
0.588611	1.75262e-08		0.588611	1.80749e-08		0.588611	3.08666e-09		0.588611	4.05472e-09		0.588611	5.41927e-09		0.588611	6.71135e-09
0.591505	1.67172e-08		0.591505	1.73237e-08		0.591505	3.07395e-09		0.591505	4.03511e-09		0.591505	5.39077e-09		0.591505	6.67e-09
0.594399	1.5936e-08		0.594399	1.66181e-08		0.594399	3.06115e-09		0.594399	4.01562e-09		0.594399	5.36247e-09		0.594399	6.629e-09
0.597293	1.51863e-08		0.597293	1.59534e-08		0.597293	3.04829e-09		0.597293	3.99627e-09		0.597293	5.33438e-09		0.597293	6.58834e-09
0.600186	1.4475e-08		0.600186	1.53106e-08		0.600186	3.03537e-09		0.600186	3.97706e-09		0.600186	5.30646e-09		0.600186	6.54805e-09
0.60308	1.38096e-08		0.60308	1.46848e-08		0.60308	3.0224e-09		0.60308	3.958e-09		0.60308	5.27869e-09		0.60308	6.5081e-09
0.605974	1.3193e-08		0.605974	1.40872e-08		0.605974	3.00939e-09		0.605974	3.9391e-09		0.605974	5.25107e-09		0.605974	6.46849e-09
0.608868	1.26207e-08		0.608868	1.35219e-08		0.608868	2.99636e-09		0.608868	3.92037e-09		0.608868	5.2236e-09		0.608868	6.42922e-09
0.611762	1.20678e-08		0.611762	1.29906e-08		0.611762	2.98332e-09		0.611762	3.90181e-09		0.611762	5.19628e-09		0.611762	6.39026e-09
0.614656	1.15236e-08		0.614656	1.24917e-08		0.614656	2.97029e-09		0.614656	3.88343e-09		0.614656	5.16911e-09		0.614656	6.35159e-09
0.61755	1.09961e-08		0.61755	1.20245e-08		0.61755	2.95729e-09		0.61755	3.86523e-09		0.61755	5.14211e-09		0.61755	6.31317e-09
0.620444	1.04928e-08		0.620444	1.15901e-08		0.620444	2.94435e-09		0.620444	3.84724e-09		0.620444	5.11526e-09		0.620444	6.27526e-09
0.623338	1.00219e-08		0.623338	1.11853e-08		0.623338	2.93148e-09		0.623338	3.82945e-09		0.623338	5.08858e-09		0.623338	6.23812e-09
0.626231	9.58295e-09		0.626231	1.07951e-08		0.626231	2.9187e-09		0.626231	3.81188e-09		0.626231	5.06206e-09		0.626231	6.20178e-09
0.629125	9.1749e-09		0.629125	1.04099e-08		0.629125	2.90605e-09		0.629125	3.79453e-09		0.629125	5.03572e-09		0.629125	6.16629e-09
0.632019	8.79826e-09		0.632019	1.00336e-08		0.632019	2.89354e-09		0.632019	3.77743e-09		0.632019	5.00955e-09		0.632019	6.13168e-09
0.634913	8.45512e-09		0.634913	9.67281e-09		0.634913	2.8812e-09		0.634913	3.7606e-09		0.634913	4.98357e-09		0.634913	6.09799e-09
0.637807	8.13583e-09		0.637807	9.33292e-09		0.637807	2.86908e-09		0.637807	3.74405e-09		0.637807	4.95779e-09		0.637807	6.06529e-09
0.640701	7.83174e-09		0.640701	9.01707e-09		0.640701	2.85729e-09		0.640701	3.72773e-09		0.640701	4.93221e-09		0.640701	6.03373e-09
0.643595	7.55287e-09		0.643595	8.73139e-09		0.643595	2.84598e-09		0.643595	3.71154e-09		0.643595	4.90689e-09		0.643595	6.00357e-09
0.643595	7.55287e-09		0.643595	8.73139e-09		0.643595	2.84598e-09		0.643595	3.71154e-09		0.643595	4.90689e-09		0.643595	6.00357e-09
0.646489	7.29948e-09		0.646489	8.47313e-09		0.646489	2.83504e-09		0.646489	3.69545e-09		0.646489	4.88175e-09		0.646489	5.97438e-09
0.649383	7.06522e-09		0.649383	8.23406e-09		0.649383	2.82425e-09		0.649383	3.67944e-09		0.649383	4.85678e-09		0.649383	5.94554e-09
0.652277	6.84963e-09		0.652277	8.01159e-09		0.652277	2.81361e-09		0.652277	3.6635e-09		0.652277	4.83199e-09		0.652277	5.91692e-09
0.65517	6.65052e-09		0.65517	7.804e-09		0.65517	2.80307e-09		0.65517	3.64761e-09		0.65517	4.80737e-09		0.65517	5.88835e-09
0.658064	6.46522e-09		0.658064	7.60936e-09		0.658064	2.79262e-09		0.658064	3.63177e-09		0.658064	4.7829e-09		0.658064	5.85968e-09
0.660958	6.2914e-09		0.660958	7.4254e-09		0.660958	2.78224e-09		0.660958	3.61598e-09		0.660958	4.7586e-09		0.660958	5.83073e-09
0.663852	6.12699e-09		0.663852	7.24986e-09		0.663852	2.7719e-09		0.663852	3.60023e-09		0.663852	4.73445e-09		0.663852	5.80166e-09
0.666746	5.9704e-09		0.666746	7.08138e-09		0.666746	2.76161e-09		0.666746	3.58452e-09		0.666746	4.71045e-09		0.666746	5.77268e-09
0.66964	5.82066e-09		0.66964	6.91911e-09		0.66964	2.75135e-09		0.66964	3.56883e-09		0.66964	4.68661e-09		0.66964	5.74377e-09
0.672534	5.67717e-09		0.672534	6.76236e-09		0.672534	2.74113e-09		0.672534	3.55318e-09		0.672534	4.66292e-09		0.672534	5.7149e-09
0.675428	5.53948e-09		0.675428	6.61086e-09		0.675428	2.73092e-09		0.675428	3.53756e-09		0.675428	4.63939e-09		0.675428	5.68606e-09
0.678322	5.40708e-09		0.678322	6.46444e-09		0.678322	2.72074e-09		0.678322	3.52196e-09		0.678322	4.61603e-09		0.678322	5.65722e-09
0.681215	5.2794e-09		0.681215	6.32321e-09		0.681215	2.71056e-09		0.681215	3.50637e-09		0.681215	4.59282e-09		0.681215	5.62836e-09
0.684109	5.15522e-09		0.684109	6.18734e-09		0.684109	2.70039e-09		0.684109	3.4908e-09		0.684109	4.56979e-09		0.684109	5.59948e-09
0.687003	5.03385e-09		0.687003	6.05689e-09		0.687003	2.69021e-09		0.687003	3.47522e-09		0.687003	4.54692e-09		0.687003	5.57053e-09
0.689897	4.91552e-09		0.689897	5.93206e-09		0.689897	2.68001e-09		0.689897	3.45965e-09		0.689897	4.52424e-09		0.689897	5.54151e-09
0.692791	4.80011e-09		0.692791	5.81223e-09		0.692791	2.66977e-09		0.692791	3.44405e-09		0.692791	4.50174e-09		0.692791	5.51238e-09
0.695685	4.68756e-09		0.695685	5.69667e-09		0.695685	2.65949e-09		0.695685	3.42843e-09		0.695685	4.47943e-09		0.695685	5.48311e-09
0.698579	4.57835e-09		0.698579	5.58555e-09		0.698579	2.64913e-09		0.698579	3.41278e-09		0.698579	4.45734e-09		0.698579	5.45367e-09
0.701473	4.47309e-09		0.701473	5.47914e-09		0.701473	2.63867e-09		0.701473	3.3971e-09		0.701473	4.43539e-09		0.701473	5.42402e-09
0.704367	4.37196e-09		0.704367	5.37785e-09		0.704367	2.62809e-09		0.704367	3.38146e-09		0.704367	4.41347e-09		0.704367	5.39411e-09
0.70726	4.27527e-09		0.70726	5.28157e-09		0.70726	2.61736e-09		0.70726	3.36595e-09		0.70726	4.39156e-09		0.70726	5.3639e-09
0.710154	4.18355e-09		0.710154	5.19025e-09		0.710154	2.60644e-09		0.710154	3.35058e-09		0.710154	4.36967e-09		0.710154	5.33365e-09
0.713048	4.09823e-09		0.713048	5.10464e-09		0.713048	2.59547e-09		0.713048	3.33537e-09		0.713048	4.34778e-09		0.713048	5.30369e-09
0.715942	4.02132e-09		0.715942	5.02586e-09		0.715942	2.58465e-09		0.715942	3.32035e-09		0.715942	4.32587e-09		0.715942	5.27416e-09
0.715942	4.02132e-09		0.715942	5.02586e-09		0.715942	2.58465e-09		0.715942	3.32035e-09		0.715942	4.32587e-09		0.715942	5.27416e-09
0.718836	3.9506e-09		0.718836	4.95181e-09		0.718836	2.57398e-09		0.718836	3.30545e-09		0.718836	4.30395e-09		0.718836	5.24479e-09
0.72173	3.8828e-09		0.72173	4.87953e-09		0.72173	2.56345e-09		0.72173	3.29055e-09		0.72173	4.28198e-09		0.72173	5.21524e-09
0.724624	3.81765e-09		0.724624	4.80885e-09		0.724624	2.55306e-09		0.724624	3.27566e-09		0.724624	4.25997e-09		0.724624	5.18548e-09
0.727518	3.7549e-09		0.727518	4.73976e-09		0.727518	2.54276e-09		0.727518	3.26076e-09		0.727518	4.23788e-09		0.727518	5.15547e-09
0.730412	3.6944e-09		0.730412	4.67208e-09		0.730412	2.53256e-09		0.730412	3.24582e-09		0.730412	4.21571e-09		0.730412	5.12518e-09
0.733305	3.63606e-09		0.733305	4.60565e-09		0.733305	2.52243e-09		0.733305	3.23083e-09		0.733305	4.19343e-09		0.733305	5.09457e-09
0.736199	3.57969e-09		0.736199	4.5403e-09		0.736199	2.51234e-09		0.736199	3.21576e-09		0.736199	4.17101e-09		0.736199	5.06357e-09
0.739093	3.5251e-09		0.739093	4.47585e-09		0.739093	2.50228e-09		0.739093	3.2006e-09		0.739093	4.14843e-09		0.739093	5.03211e-09
0.741987	3.47213e-09		0.741987	4.41236e-09		0.741987	2.49222e-09		0.741987	3.18531e-09		0.741987	4.12565e-09		0.741987	5.00012e-09
0.744881	3.42057e-09		0.744881	4.34992e-09		0.744881	2.48214e-09		0.744881	3.16986e-09		0.744881	4.10265e-09		0.744881	4.96747e-09
0.747775	3.3702e-09		0.747775	4.28843e-09		0.747775	2.472e-09		0.747775	3.15423e-09		0.747775	4.07938e-09		0.747775	4.93406e-09
0.750669	3.32086e-09		0.750669	4.22758e-09		0.750669	2.46179e-09		0.750669	3.13838e-09		0.750669	4.05579e-09		0.750669	4.89975e-09
0.753563	3.2725e-09		0.753563	4.16704e-09		0.753563	2.45145e-09		0.753563	3.12226e-09		0.753563	4.03185e-09		0.753563	4.86443e-09
0.756457	3.22504e-09		0.756457	4.10662e-09		0.756457	2.44095e-09		0.756457	3.10583e-09		0.756457	4.0074e-09		0.756457	4.82839e-09
0.75935	3.17828e-09		0.75935	4.04617e-09		0.75935	2.43026e-09		0.75935	3.08904e-09		0.75935	3.98231e-09		0.75935	4.79195e-09
0.762244	3.13204e-09		0.762244	3.98562e-09		0.762244	2.41932e-09		0.762244	3.07186e-09		0.762244	3.95651e-09		0.762244	4.75498e-09
0.765138	3.08616e-09		0.765138	3.9251e-09		0.765138	2.40811e-09		0.765138	3.05419e-09		0.765138	3.92994e-09		0.765138	4.71734e-09
0.768032	3.04051e-09		0.768032	3.86465e-09		0.768032	2.39656e-09		0.768032	3.03589e-09		0.768032	3.90253e-09		0.768032	4.67892e-09
0.770926	2.99496e-09		0.770926	3.80413e-09		0.770926	2.38465e-09		0.770926	3.01693e-09		0.770926	3.87422e-09		0.770926	4.63965e-09
0.77382	2.94958e-09		0.77382	3.74346e-09		0.77382	2.37232e-09		0.77382	2.99725e-09		0.77382	3.84496e-09		0.77382	4.59946e-09
0.776714	2.9047e-09		0.776714	3.68262e-09		0.776714	2.35955e-09		0.776714	2.9768e-09		0.776714	3.81471e-09		0.776714	4.55834e-09
0.779608	2.86055e-09		0.779608	3.62164e-09		0.779608	2.3463e-09		0.779608	2.95557e-09		0.779608	3.78344e-09		0.779608	4.51627e-09
0.782502	2.81712e-09		0.782502	3.56067e-09		0.782502	2.33255e-09		0.782502	2.93352e-09		0.782502	3.75114e-09		0.782502	4.4733e-09
0.785396	2.7745e-09		0.785396	3.50002e-09		0.785396	2.31828e-09		0.785396	2.91066e-09		0.785396	3.71783e-09		0.785396	4.42946e-09
0.788289	2.73278e-09		0.788289	3.44008e-09		0.788289	2.30345e-09		0.788289	2.88698e-09		0.788289	3.68351e-09		0.788289	4.38482e-09
0.791183	2.69212e-09		0.791183	3.38118e-09		0.791183	2.28807e-09		0.791183	2.8625e-09		0.791183	3.64826e-09		0.791183	4.33918e-09
0.794077	2.6527e-09		0.794077	3.32368e-09		0.794077	2.27214e-09		0.794077	2.83723e-09		0.794077	3.612e-09		0.794077	4.29235e-09
0.796971	2.61505e-09		0.796971	3.26784e-09		0.796971	2.25565e-09		0.796971	2.81118e-09		0.796971	3.57467e-09		0.796971	4.24443e-09
0.799865	2.57965e-09		0.799865	3.21388e-09		0.799865	2.23862e-09		0.799865	2.78434e-09		0.799865	3.53628e-09		0.799865	4.19553e-09
0.799865	2.57965e-09		0.799865	3.21388e-09		0.799865	2.23862e-09		0.799865	2.78434e-09		0.799865	3.53628e-09		0.799865	4.19553e-09
0.802759	2.54513e-09		0.802759	3.16088e-09		0.802759	2.22096e-09		0.802759	2.7566e-09		0.802759	3.49677e-09		0.802759	4.14534e-09
0.805653	2.5102e-09		0.805653	3.10792e-09		0.805653	2.20258e-09		0.805653	2.72778e-09		0.805653	3.45603e-09		0.805653	4.09355e-09
0.808547	2.47499e-09		0.808547	3.05512e-09		0.808547	2.18345e-09		0.808547	2.69801e-09		0.808547	3.4141e-09		0.808547	4.04021e-09
0.811441	2.43959e-09		0.811441	3.00251e-09		0.811441	2.16356e-09		0.811441	2.66742e-09		0.811441	3.37098e-09		0.811441	3.98539e-09
0.814334	2.40404e-09		0.814334	2.95008e-09		0.814334	2.14285e-09		0.814334	2.63603e-09		0.814334	3.32671e-09		0.814334	3.92913e-09
0.817228	2.36833e-09		0.817228	2.89775e-09		0.817228	2.12132e-09		0.817228	2.60384e-09		0.817228	3.28131e-09		0.817228	3.87148e-09
0.820122	2.33236e-09		0.820122	2.84534e-09		0.820122	2.09891e-09		0.820122	2.57086e-09		0.820122	3.23476e-09		0.820122	3.81249e-09
0.823016	2.29626e-09		0.823016	2.79264e-09		0.823016	2.07561e-09		0.823016	2.53712e-09		0.823016	3.18704e-09		0.823016	3.7522e-09
0.82591	2.26017e-09		0.82591	2.73948e-09		0.82591	2.05134e-09		0.82591	2.50267e-09		0.82591	3.13817e-09		0.82591	3.69066e-09
0.828804	2.22395e-09		0.828804	2.68567e-09		0.828804	2.02603e-09		0.828804	2.46755e-09		0.828804	3.08821e-09		0.828804	3.62794e-09
0.831698	2.18746e-09		0.831698	2.631e-09		0.831698	1.99965e-09		0.831698	2.43189e-09		0.831698	3.0372e-09		0.831698	3.56419e-09
0.834592	2.15058e-09		0.834592	2.57521e-09		0.834592	1.9722e-09		0.834592	2.39555e-09		0.834592	2.98523e-09		0.834592	3.49963e-09
0.837486	2.11347e-09		0.837486	2.51887e-09		0.837486	1.9437e-09		0.837486	2.3584e-09		0.837486	2.93239e-09		0.837486	3.43441e-09
0.840379	2.07636e-09		0.840379	2.46276e-09		0.840379	1.91419e-09		0.840379	2.32054e-09		0.840379	2.87885e-09		0.840379	3.36869e-09
0.843273	2.03924e-09		0.843273	2.40686e-09		0.843273	1.88371e-09		0.843273	2.2821e-09		0.843273	2.82477e-09		0.843273	3.30267e-09
0.846167	2.00212e-09		0.846167	2.35118e-09		0.846167	1.85235e-09		0.846167	2.24323e-09		0.846167	2.77035e-09		0.846167	3.23653e-09
0.849061	1.965e-09		0.849061	2.29571e-09		0.849061	1.82026e-09		0.849061	2.20414e-09		0.849061	2.71576e-09		0.849061	3.17047e-09
0.851955	1.92788e-09		0.851955	2.2405e-09		0.851955	1.78765e-09		0.851955	2.165e-09		0.851955	2.66124e-09		0.851955	3.10478e-09
0.854849	1.89076e-09		0.854849	2.18621e-09		0.854849	1.75477e-09		0.854849	2.12599e-09		0.854849	2.60713e-09		0.854849	3.03981e-09
0.857743	1.85424e-09		0.857743	2.13355e-09		0.857743	1.72185e-09		0.857743	2.08732e-09		0.857743	2.55393e-09		0.857743	2.97596e-09
0.860637	1.81907e-09		0.860637	2.08276e-09		0.860637	1.68918e-09		0.860637	2.04937e-09		0.860637	2.50218e-09		0.860637	2.91381e-09
0.863531	1.78565e-09		0.863531	2.03413e-09		0.863531	1.65715e-09		0.863531	2.01263e-09		0.863531	2.4524e-09		0.863531	2.85412e-09
0.866424	1.7545e-09		0.866424	1.98818e-09		0.866424	1.6263e-09		0.866424	1.97777e-09		0.866424	2.40529e-09		0.866424	2.79789e-09
0.869318	1.72639e-09		0.869318	1.94574e-09		0.869318	1.59772e-09		0.869318	1.94578e-09		0.869318	2.36196e-09		0.869318	2.7466e-09
0.872212	1.70258e-09		0.872212	1.90927e-09		0.872212	1.573e-09		0.872212	1.91821e-09		0.872212	2.32465e-09		0.872212	2.70261e-09
0.875106	1.68507e-09		0.875106	1.88253e-09		0.875106	1.5544e-09		0.875106	1.89757e-09		0.875106	2.29697e-09		0.875106	2.66982e-09
0.878	1.67826e-09		0.878	1.8721e-09		0.878	1.54695e-09		0.878	1.88937e-09		0.878	2.28605e-09		0.878	2.65684e-09

## Sheet: no2 distribution
SN 0			SN 0.2			SN 0.4			SN 0.6			SN 0.8			SN 1
Axial distance	no2 mass fraction		Axial distance	no2 mass fraction		Axial distance	no2 mass fraction		Axial distance	no2 mass fraction		Axial distance	no2 mass fraction		Axial distance	no2 mass fraction
0.00115113	3.37966e-09		0.00115113	3.39086e-09		0.00115113	1.9979e-09		0.00115113	7.31354e-10		0.00115113	4.17377e-10		0.00115113	2.3045e-10
0.00404502	4.73474e-09		0.00404502	4.66548e-09		0.00404502	2.42032e-09		0.00404502	9.00146e-10		0.00404502	4.65068e-10		0.00404502	2.5379e-10
0.00693891	6.21439e-09		0.00693891	6.01835e-09		0.00693891	2.7879e-09		0.00693891	1.07233e-09		0.00693891	4.99837e-10		0.00693891	2.68496e-10
0.0098328	7.83175e-09		0.0098328	7.44768e-09		0.0098328	3.11846e-09		0.0098328	1.22618e-09		0.0098328	5.2397e-10		0.0098328	2.73278e-10
0.0127267	9.51756e-09		0.0127267	8.86747e-09		0.0127267	3.44318e-09		0.0127267	1.34215e-09		0.0127267	5.37325e-10		0.0127267	2.70242e-10
0.0156206	1.11789e-08		0.0156206	1.01865e-08		0.0156206	3.79357e-09		0.0156206	1.41544e-09		0.0156206	5.38062e-10		0.0156206	2.60055e-10
0.0185145	1.27151e-08		0.0185145	1.13248e-08		0.0185145	4.18251e-09		0.0185145	1.44745e-09		0.0185145	5.2691e-10		0.0185145	2.42565e-10
0.0214084	1.4038e-08		0.0214084	1.22217e-08		0.0214084	4.59993e-09		0.0214084	1.44175e-09		0.0214084	5.0566e-10		0.0214084	2.21473e-10
0.0243023	1.50919e-08		0.0243023	1.28552e-08		0.0243023	5.01543e-09		0.0243023	1.40505e-09		0.0243023	4.7528e-10		0.0243023	2.00104e-10
0.0271961	1.58593e-08		0.0271961	1.32447e-08		0.0271961	5.39289e-09		0.0271961	1.35108e-09		0.0271961	4.37432e-10		0.0271961	1.8209e-10
0.03009	1.63524e-08		0.03009	1.34359e-08		0.03009	5.70511e-09		0.03009	1.28425e-09		0.03009	3.98786e-10		0.03009	1.73795e-10
0.0329839	1.66063e-08		0.0329839	1.34862e-08		0.0329839	5.93696e-09		0.0329839	1.20938e-09		0.0329839	3.67753e-10		0.0329839	1.78088e-10
0.0358778	1.66718e-08		0.0358778	1.34547e-08		0.0358778	6.08845e-09		0.0358778	1.13071e-09		0.0358778	3.5474e-10		0.0358778	1.95864e-10
0.0387717	1.66062e-08		0.0387717	1.33952e-08		0.0387717	6.16637e-09		0.0387717	1.04632e-09		0.0387717	3.6591e-10		0.0387717	2.30972e-10
0.0416656	1.64614e-08		0.0416656	1.33526e-08		0.0416656	6.17685e-09		0.0416656	9.69187e-10		0.0416656	4.11192e-10		0.0416656	2.86852e-10
0.0445595	1.62858e-08		0.0445595	1.33612e-08		0.0445595	6.13115e-09		0.0445595	9.32616e-10		0.0445595	5.20437e-10		0.0445595	3.67497e-10
0.0474534	1.6118e-08		0.0474534	1.34427e-08		0.0474534	6.04237e-09		0.0474534	9.83528e-10		0.0474534	7.5093e-10		0.0474534	4.79265e-10
0.0503473	1.59862e-08		0.0503473	1.36087e-08		0.0503473	5.91995e-09		0.0503473	1.27031e-09		0.0503473	1.23098e-09		0.0503473	6.32235e-10
0.0532412	1.59141e-08		0.0532412	1.38626e-08		0.0532412	5.77244e-09		0.0532412	2.2185e-09		0.0532412	2.24986e-09		0.0532412	8.49058e-10
0.056135	1.59176e-08		0.056135	1.42012e-08		0.056135	5.60751e-09		0.056135	4.95988e-09		0.056135	4.52774e-09		0.056135	1.18788e-09
0.0590289	1.60057e-08		0.0590289	1.46151e-08		0.0590289	5.43637e-09		0.0590289	1.23262e-08		0.0590289	9.96554e-09		0.0590289	1.79913e-09
0.0619228	1.61832e-08		0.0619228	1.50894e-08		0.0619228	5.25799e-09		0.0619228	2.87317e-08		0.0619228	2.26894e-08		0.0619228	3.06671e-09
0.0648167	1.64501e-08		0.0648167	1.56077e-08		0.0648167	5.06424e-09		0.0648167	6.14774e-08		0.0648167	4.86384e-08		0.0648167	5.88121e-09
0.0677106	1.68047e-08		0.0677106	1.61482e-08		0.0677106	4.85894e-09		0.0677106	1.20038e-07		0.0677106	9.5306e-08		0.0677106	1.23127e-08
0.0706045	1.72388e-08		0.0706045	1.66861e-08		0.0706045	4.64725e-09		0.0706045	2.29434e-07		0.0706045	1.82116e-07		0.0706045	2.63938e-08
0.0734984	1.77395e-08		0.0734984	1.72034e-08		0.0734984	4.43299e-09		0.0734984	4.2794e-07		0.0734984	3.41323e-07		0.0734984	5.47978e-08
0.0763923	1.82949e-08		0.0763923	1.76862e-08		0.0763923	4.22126e-09		0.0763923	7.41487e-07		0.0763923	6.05186e-07		0.0763923	1.06591e-07
0.0792862	1.88915e-08		0.0792862	1.81224e-08		0.0792862	4.0318e-09		0.0792862	1.16152e-06		0.0792862	9.8612e-07		0.0792862	1.92238e-07
0.0821801	1.95155e-08		0.0821801	1.85052e-08		0.0821801	3.94305e-09		0.0821801	1.63621e-06		0.0821801	1.45605e-06		0.0821801	3.35732e-07
0.085074	2.0153e-08		0.085074	1.8832e-08		0.085074	4.13264e-09		0.085074	2.10001e-06		0.085074	1.95154e-06		0.085074	5.65736e-07
0.085074	2.0153e-08		0.085074	1.8832e-08		0.085074	4.13264e-09		0.085074	2.10001e-06		0.085074	1.95154e-06		0.085074	5.65736e-07
0.0879678	2.07914e-08		0.0879678	1.91045e-08		0.0879678	5.19064e-09		0.0879678	2.46034e-06		0.0879678	2.38432e-06		0.0879678	8.94195e-07
0.0908617	2.14213e-08		0.0908617	1.93279e-08		0.0908617	8.66438e-09		0.0908617	2.66516e-06		0.0908617	2.67195e-06		0.0908617	1.30822e-06
0.0937556	2.20345e-08		0.0937556	1.95105e-08		0.0937556	1.78805e-08		0.0937556	2.75771e-06		0.0937556	2.81625e-06		0.0937556	1.76687e-06
0.0966495	2.26227e-08		0.0966495	1.96617e-08		0.0966495	3.82277e-08		0.0966495	2.79154e-06		0.0966495	2.87865e-06		0.0966495	2.21866e-06
0.0995434	2.31786e-08		0.0995434	1.9791e-08		0.0995434	7.73581e-08		0.0995434	2.79513e-06		0.0995434	2.90001e-06		0.0995434	2.57663e-06
0.102437	2.36953e-08		0.102437	1.99083e-08		0.102437	1.47993e-07		0.102437	2.78053e-06		0.102437	2.90107e-06		0.102437	2.79309e-06
0.105331	2.41664e-08		0.105331	2.00225e-08		0.105331	2.66169e-07		0.105331	2.75581e-06		0.105331	2.8926e-06		0.105331	2.90834e-06
0.108225	2.45867e-08		0.108225	2.01436e-08		0.108225	4.45363e-07		0.108225	2.7266e-06		0.108225	2.87877e-06		0.108225	2.96674e-06
0.111119	2.49583e-08		0.111119	2.02759e-08		0.111119	6.9171e-07		0.111119	2.69614e-06		0.111119	2.86283e-06		0.111119	2.995e-06
0.114013	2.52745e-08		0.114013	2.04225e-08		0.114013	9.99765e-07		0.114013	2.66664e-06		0.114013	2.84732e-06		0.114013	3.00637e-06
0.116907	2.55359e-08		0.116907	2.05907e-08		0.116907	1.35346e-06		0.116907	2.63904e-06		0.116907	2.83218e-06		0.116907	3.00843e-06
0.119801	2.57486e-08		0.119801	2.07832e-08		0.119801	1.73147e-06		0.119801	2.61388e-06		0.119801	2.81846e-06		0.119801	3.00508e-06
0.122695	2.59137e-08		0.122695	2.10046e-08		0.122695	2.10766e-06		0.122695	2.59163e-06		0.122695	2.80689e-06		0.122695	2.99902e-06
0.125588	2.60412e-08		0.125588	2.1251e-08		0.125588	2.42394e-06		0.125588	2.57248e-06		0.125588	2.79714e-06		0.125588	2.99243e-06
0.128482	2.61377e-08		0.128482	2.15233e-08		0.128482	2.63549e-06		0.128482	2.5563e-06		0.128482	2.78892e-06		0.128482	2.98579e-06
0.131376	2.62092e-08		0.131376	2.18199e-08		0.131376	2.75251e-06		0.131376	2.54272e-06		0.131376	2.78193e-06		0.131376	2.97919e-06
0.13427	2.62614e-08		0.13427	2.21339e-08		0.13427	2.80027e-06		0.13427	2.53138e-06		0.13427	2.7759e-06		0.13427	2.97307e-06
0.137164	2.63061e-08		0.137164	2.24689e-08		0.137164	2.80209e-06		0.137164	2.52194e-06		0.137164	2.77069e-06		0.137164	2.96782e-06
0.140058	2.63479e-08		0.140058	2.28284e-08		0.140058	2.77702e-06		0.140058	2.51412e-06		0.140058	2.76617e-06		0.140058	2.96336e-06
0.142952	2.63855e-08		0.142952	2.32027e-08		0.142952	2.73861e-06		0.142952	2.50767e-06		0.142952	2.76217e-06		0.142952	2.95951e-06
0.145846	2.64244e-08		0.145846	2.35815e-08		0.145846	2.69405e-06		0.145846	2.50235e-06		0.145846	2.75857e-06		0.145846	2.95615e-06
0.14874	2.64692e-08		0.14874	2.3968e-08		0.14874	2.64791e-06		0.14874	2.49792e-06		0.14874	2.75527e-06		0.14874	2.95315e-06
0.151633	2.65254e-08		0.151633	2.43636e-08		0.151633	2.60192e-06		0.151633	2.49423e-06		0.151633	2.75219e-06		0.151633	2.95043e-06
0.154527	2.65982e-08		0.154527	2.47573e-08		0.154527	2.55759e-06		0.154527	2.49113e-06		0.154527	2.74926e-06		0.154527	2.94792e-06
0.157421	2.66901e-08		0.157421	2.51414e-08		0.157421	2.51651e-06		0.157421	2.48849e-06		0.157421	2.74644e-06		0.157421	2.94556e-06
0.160315	2.68031e-08		0.160315	2.55202e-08		0.160315	2.47899e-06		0.160315	2.4862e-06		0.160315	2.7437e-06		0.160315	2.9433e-06
0.163209	2.69401e-08		0.163209	2.58918e-08		0.163209	2.4454e-06		0.163209	2.48416e-06		0.163209	2.741e-06		0.163209	2.94112e-06
0.166103	2.71021e-08		0.166103	2.62577e-08		0.166103	2.4159e-06		0.166103	2.48231e-06		0.166103	2.73834e-06		0.166103	2.93897e-06
0.166103	2.71021e-08		0.166103	2.62577e-08		0.166103	2.4159e-06		0.166103	2.48231e-06		0.166103	2.73834e-06		0.166103	2.93897e-06
0.168997	2.72932e-08		0.168997	2.66261e-08		0.168997	2.38998e-06		0.168997	2.48055e-06		0.168997	2.73569e-06		0.168997	2.93669e-06
0.171891	2.75113e-08		0.171891	2.69961e-08		0.171891	2.36713e-06		0.171891	2.47883e-06		0.171891	2.73306e-06		0.171891	2.93417e-06
0.174785	2.77546e-08		0.174785	2.73676e-08		0.174785	2.34721e-06		0.174785	2.47712e-06		0.174785	2.73043e-06		0.174785	2.93147e-06
0.177678	2.80297e-08		0.177678	2.77524e-08		0.177678	2.33005e-06		0.177678	2.47541e-06		0.177678	2.72779e-06		0.177678	2.92864e-06
0.180572	2.83326e-08		0.180572	2.81594e-08		0.180572	2.31542e-06		0.180572	2.47369e-06		0.180572	2.72515e-06		0.180572	2.9257e-06
0.183466	2.86662e-08		0.183466	2.85813e-08		0.183466	2.30305e-06		0.183466	2.47197e-06		0.183466	2.72249e-06		0.183466	2.92265e-06
0.18636	2.90445e-08		0.18636	2.90107e-08		0.18636	2.29265e-06		0.18636	2.47023e-06		0.18636	2.71982e-06		0.18636	2.9195e-06
0.189254	2.94571e-08		0.189254	2.94509e-08		0.189254	2.28395e-06		0.189254	2.46849e-06		0.189254	2.71712e-06		0.189254	2.91625e-06
0.192148	2.98953e-08		0.192148	2.9903e-08		0.192148	2.27668e-06		0.192148	2.46673e-06		0.192148	2.7144e-06		0.192148	2.91291e-06
0.195042	3.03649e-08		0.195042	3.03709e-08		0.195042	2.27062e-06		0.195042	2.46497e-06		0.195042	2.71165e-06		0.195042	2.90949e-06
0.197936	3.08561e-08		0.197936	3.0852e-08		0.197936	2.26555e-06		0.197936	2.46317e-06		0.197936	2.70886e-06		0.197936	2.906e-06
0.20083	3.13644e-08		0.20083	3.1345e-08		0.20083	2.2613e-06		0.20083	2.4613e-06		0.20083	2.70603e-06		0.20083	2.90245e-06
0.203723	3.19036e-08		0.203723	3.18586e-08		0.203723	2.2577e-06		0.203723	2.45937e-06		0.203723	2.70319e-06		0.203723	2.89883e-06
0.206617	3.24699e-08		0.206617	3.24021e-08		0.206617	2.25461e-06		0.206617	2.45739e-06		0.206617	2.70041e-06		0.206617	2.89516e-06
0.209511	3.30571e-08		0.209511	3.29842e-08		0.209511	2.25191e-06		0.209511	2.45537e-06		0.209511	2.69768e-06		0.209511	2.89144e-06
0.212405	3.36737e-08		0.212405	3.36129e-08		0.212405	2.24951e-06		0.212405	2.45329e-06		0.212405	2.69499e-06		0.212405	2.88767e-06
0.215299	3.43214e-08		0.215299	3.42946e-08		0.215299	2.24735e-06		0.215299	2.45117e-06		0.215299	2.69236e-06		0.215299	2.88386e-06
0.215299	3.43214e-08		0.215299	3.42946e-08		0.215299	2.24735e-06		0.215299	2.45117e-06		0.215299	2.69236e-06		0.215299	2.88386e-06
0.218193	3.50049e-08		0.218193	3.50404e-08		0.218193	2.24535e-06		0.218193	2.449e-06		0.218193	2.68973e-06		0.218193	2.87999e-06
0.221087	3.57284e-08		0.221087	3.58629e-08		0.221087	2.24343e-06		0.221087	2.44676e-06		0.221087	2.68704e-06		0.221087	2.87604e-06
0.223981	3.64943e-08		0.223981	3.67646e-08		0.223981	2.24153e-06		0.223981	2.44444e-06		0.223981	2.68424e-06		0.223981	2.872e-06
0.226875	3.7317e-08		0.226875	3.7761e-08		0.226875	2.23962e-06		0.226875	2.44204e-06		0.226875	2.68133e-06		0.226875	2.86787e-06
0.229768	3.81939e-08		0.229768	3.88531e-08		0.229768	2.23771e-06		0.229768	2.43957e-06		0.229768	2.67831e-06		0.229768	2.86363e-06
0.232662	3.91118e-08		0.232662	4.00329e-08		0.232662	2.23576e-06		0.232662	2.43703e-06		0.232662	2.6752e-06		0.232662	2.85931e-06
0.235556	4.00753e-08		0.235556	4.13125e-08		0.235556	2.23379e-06		0.235556	2.43442e-06		0.235556	2.67199e-06		0.235556	2.85495e-06
0.23845	4.11013e-08		0.23845	4.26969e-08		0.23845	2.23179e-06		0.23845	2.43175e-06		0.23845	2.66869e-06		0.23845	2.85052e-06
0.241344	4.21842e-08		0.241344	4.41912e-08		0.241344	2.22975e-06		0.241344	2.42902e-06		0.241344	2.66532e-06		0.241344	2.84605e-06
0.244238	4.33194e-08		0.244238	4.57995e-08		0.244238	2.22768e-06		0.244238	2.42623e-06		0.244238	2.66188e-06		0.244238	2.84152e-06
0.247132	4.45139e-08		0.247132	4.75243e-08		0.247132	2.22557e-06		0.247132	2.4234e-06		0.247132	2.65838e-06		0.247132	2.83693e-06
0.250026	4.57657e-08		0.250026	4.93701e-08		0.250026	2.22344e-06		0.250026	2.42052e-06		0.250026	2.65482e-06		0.250026	2.8323e-06
0.25292	4.70839e-08		0.25292	5.13379e-08		0.25292	2.22131e-06		0.25292	2.41759e-06		0.25292	2.65119e-06		0.25292	2.82762e-06
0.255814	4.84742e-08		0.255814	5.34333e-08		0.255814	2.21915e-06		0.255814	2.41462e-06		0.255814	2.64752e-06		0.255814	2.82289e-06
0.258707	4.99413e-08		0.258707	5.56735e-08		0.258707	2.21699e-06		0.258707	2.41161e-06		0.258707	2.64378e-06		0.258707	2.8181e-06
0.261601	5.1488e-08		0.261601	5.80754e-08		0.261601	2.2148e-06		0.261601	2.40856e-06		0.261601	2.64e-06		0.261601	2.81326e-06
0.264495	5.31236e-08		0.264495	6.0655e-08		0.264495	2.2126e-06		0.264495	2.40548e-06		0.264495	2.63615e-06		0.264495	2.80838e-06
0.267389	5.48531e-08		0.267389	6.34297e-08		0.267389	2.21038e-06		0.267389	2.40237e-06		0.267389	2.63225e-06		0.267389	2.80343e-06
0.270283	5.66739e-08		0.270283	6.64142e-08		0.270283	2.20814e-06		0.270283	2.39923e-06		0.270283	2.62832e-06		0.270283	2.79843e-06
0.273177	5.85931e-08		0.273177	6.96323e-08		0.273177	2.20589e-06		0.273177	2.39605e-06		0.273177	2.62441e-06		0.273177	2.79336e-06
0.276071	6.06219e-08		0.276071	7.31089e-08		0.276071	2.20363e-06		0.276071	2.39286e-06		0.276071	2.6205e-06		0.276071	2.78823e-06
0.278965	6.27703e-08		0.278965	7.68568e-08		0.278965	2.20135e-06		0.278965	2.38963e-06		0.278965	2.61659e-06		0.278965	2.78307e-06
0.281859	6.50487e-08		0.281859	8.08776e-08		0.281859	2.19906e-06		0.281859	2.38638e-06		0.281859	2.61268e-06		0.281859	2.7779e-06
0.284752	6.74677e-08		0.284752	8.51697e-08		0.284752	2.19675e-06		0.284752	2.38308e-06		0.284752	2.60877e-06		0.284752	2.77274e-06
0.287646	7.00384e-08		0.287646	8.97518e-08		0.287646	2.19444e-06		0.287646	2.37975e-06		0.287646	2.60486e-06		0.287646	2.76758e-06
0.29054	7.27805e-08		0.29054	9.46399e-08		0.29054	2.19212e-06		0.29054	2.37637e-06		0.29054	2.60095e-06		0.29054	2.76243e-06
0.293434	7.57085e-08		0.293434	9.9844e-08		0.293434	2.18979e-06		0.293434	2.37297e-06		0.293434	2.59704e-06		0.293434	2.75728e-06
0.296328	7.88284e-08		0.296328	1.05387e-07		0.296328	2.18746e-06		0.296328	2.36952e-06		0.296328	2.59312e-06		0.296328	2.75215e-06
0.299222	8.2155e-08		0.299222	1.11293e-07		0.299222	2.18512e-06		0.299222	2.36604e-06		0.299222	2.58919e-06		0.299222	2.74702e-06
0.302116	8.57071e-08		0.302116	1.17588e-07		0.302116	2.18278e-06		0.302116	2.36253e-06		0.302116	2.58525e-06		0.302116	2.74191e-06
0.30501	8.95058e-08		0.30501	1.24294e-07		0.30501	2.18044e-06		0.30501	2.35899e-06		0.30501	2.58129e-06		0.30501	2.73679e-06
0.307904	9.35747e-08		0.307904	1.31434e-07		0.307904	2.1781e-06		0.307904	2.35542e-06		0.307904	2.57732e-06		0.307904	2.73169e-06
0.310797	9.79408e-08		0.310797	1.39032e-07		0.310797	2.17576e-06		0.310797	2.35182e-06		0.310797	2.57333e-06		0.310797	2.72658e-06
0.313691	1.0264e-07		0.313691	1.47107e-07		0.313691	2.17342e-06		0.313691	2.34819e-06		0.313691	2.56931e-06		0.313691	2.72147e-06
0.313691	1.0264e-07		0.313691	1.47107e-07		0.313691	2.17342e-06		0.313691	2.34819e-06		0.313691	2.56931e-06		0.313691	2.72147e-06
0.316585	1.07708e-07		0.316585	1.55696e-07		0.316585	2.17104e-06		0.316585	2.3446e-06		0.316585	2.56521e-06		0.316585	2.7163e-06
0.319479	1.13178e-07		0.319479	1.64826e-07		0.319479	2.16859e-06		0.319479	2.34112e-06		0.319479	2.56096e-06		0.319479	2.71102e-06
0.322373	1.19079e-07		0.322373	1.74526e-07		0.322373	2.16609e-06		0.322373	2.33773e-06		0.322373	2.55659e-06		0.322373	2.70565e-06
0.325267	1.25438e-07		0.325267	1.84817e-07		0.325267	2.16354e-06		0.325267	2.3344e-06		0.325267	2.55213e-06		0.325267	2.70024e-06
0.328161	1.32296e-07		0.328161	1.95687e-07		0.328161	2.16096e-06		0.328161	2.33115e-06		0.328161	2.54765e-06		0.328161	2.69477e-06
0.331055	1.39704e-07		0.331055	2.0715e-07		0.331055	2.15834e-06		0.331055	2.32795e-06		0.331055	2.54313e-06		0.331055	2.68926e-06
0.333949	1.47697e-07		0.333949	2.19241e-07		0.333949	2.15569e-06		0.333949	2.32481e-06		0.333949	2.5386e-06		0.333949	2.68372e-06
0.336842	1.56311e-07		0.336842	2.31999e-07		0.336842	2.15302e-06		0.336842	2.32172e-06		0.336842	2.53404e-06		0.336842	2.67813e-06
0.339736	1.65591e-07		0.339736	2.45455e-07		0.339736	2.15032e-06		0.339736	2.31869e-06		0.339736	2.52946e-06		0.339736	2.67252e-06
0.34263	1.75598e-07		0.34263	2.59651e-07		0.34263	2.14762e-06		0.34263	2.3157e-06		0.34263	2.52486e-06		0.34263	2.66688e-06
0.345524	1.86395e-07		0.345524	2.7467e-07		0.345524	2.14492e-06		0.345524	2.31277e-06		0.345524	2.52024e-06		0.345524	2.66121e-06
0.348418	1.98022e-07		0.348418	2.90581e-07		0.348418	2.14223e-06		0.348418	2.30989e-06		0.348418	2.5156e-06		0.348418	2.65551e-06
0.351312	2.10518e-07		0.351312	3.07397e-07		0.351312	2.13955e-06		0.351312	2.30702e-06		0.351312	2.51095e-06		0.351312	2.64979e-06
0.354206	2.23942e-07		0.354206	3.2514e-07		0.354206	2.13688e-06		0.354206	2.30412e-06		0.354206	2.50627e-06		0.354206	2.64404e-06
0.3571	2.3835e-07		0.3571	3.43876e-07		0.3571	2.13421e-06		0.3571	2.30119e-06		0.3571	2.50158e-06		0.3571	2.63826e-06
0.359994	2.53799e-07		0.359994	3.6369e-07		0.359994	2.13155e-06		0.359994	2.29823e-06		0.359994	2.49686e-06		0.359994	2.63246e-06
0.362887	2.7035e-07		0.362887	3.84672e-07		0.362887	2.1289e-06		0.362887	2.29524e-06		0.362887	2.49211e-06		0.362887	2.62665e-06
0.365781	2.88069e-07		0.365781	4.06952e-07		0.365781	2.12625e-06		0.365781	2.29223e-06		0.365781	2.48734e-06		0.365781	2.62082e-06
0.368675	3.07027e-07		0.368675	4.30648e-07		0.368675	2.12361e-06		0.368675	2.28918e-06		0.368675	2.48254e-06		0.368675	2.61498e-06
0.371569	3.27295e-07		0.371569	4.558e-07		0.371569	2.12099e-06		0.371569	2.28611e-06		0.371569	2.4777e-06		0.371569	2.60913e-06
0.374463	3.48955e-07		0.374463	4.82474e-07		0.374463	2.11837e-06		0.374463	2.28301e-06		0.374463	2.47287e-06		0.374463	2.60326e-06
0.377357	3.72106e-07		0.377357	5.10872e-07		0.377357	2.11576e-06		0.377357	2.27988e-06		0.377357	2.46809e-06		0.377357	2.59737e-06
0.380251	3.96856e-07		0.380251	5.41179e-07		0.380251	2.11316e-06		0.380251	2.27672e-06		0.380251	2.46337e-06		0.380251	2.59147e-06
0.383145	4.23316e-07		0.383145	5.73453e-07		0.383145	2.11057e-06		0.383145	2.27353e-06		0.383145	2.45869e-06		0.383145	2.58555e-06
0.386039	4.51583e-07		0.386039	6.07775e-07		0.386039	2.10798e-06		0.386039	2.27031e-06		0.386039	2.45406e-06		0.386039	2.5796e-06
0.388932	4.81753e-07		0.388932	6.44319e-07		0.388932	2.1054e-06		0.388932	2.26706e-06		0.388932	2.44949e-06		0.388932	2.57362e-06
0.391826	5.13952e-07		0.391826	6.83319e-07		0.391826	2.10283e-06		0.391826	2.26377e-06		0.391826	2.44497e-06		0.391826	2.56761e-06
0.39472	5.48272e-07		0.39472	7.25158e-07		0.39472	2.10025e-06		0.39472	2.26043e-06		0.39472	2.4405e-06		0.39472	2.56155e-06
0.397614	5.84753e-07		0.397614	7.70207e-07		0.397614	2.09767e-06		0.397614	2.25705e-06		0.397614	2.43609e-06		0.397614	2.55548e-06
0.400508	6.23473e-07		0.400508	8.18725e-07		0.400508	2.09508e-06		0.400508	2.25361e-06		0.400508	2.43173e-06		0.400508	2.54943e-06
0.403402	6.64569e-07		0.403402	8.7118e-07		0.403402	2.09248e-06		0.403402	2.25012e-06		0.403402	2.42742e-06		0.403402	2.54339e-06
0.403402	6.64569e-07		0.403402	8.7118e-07		0.403402	2.09248e-06		0.403402	2.25012e-06		0.403402	2.42742e-06		0.403402	2.54339e-06
0.406296	7.08237e-07		0.406296	9.2818e-07		0.406296	2.08986e-06		0.406296	2.24658e-06		0.406296	2.42313e-06		0.406296	2.53737e-06
0.40919	7.54662e-07		0.40919	9.90615e-07		0.40919	2.08723e-06		0.40919	2.24304e-06		0.40919	2.41883e-06		0.40919	2.53135e-06
0.412084	8.04014e-07		0.412084	1.05966e-06		0.412084	2.08458e-06		0.412084	2.23948e-06		0.412084	2.4145e-06		0.412084	2.52533e-06
0.414977	8.56509e-07		0.414977	1.13725e-06		0.414977	2.08192e-06		0.414977	2.23589e-06		0.414977	2.41016e-06		0.414977	2.51932e-06
0.417871	9.12363e-07		0.417871	1.22688e-06		0.417871	2.07924e-06		0.417871	2.23226e-06		0.417871	2.40582e-06		0.417871	2.51331e-06
0.420765	9.71906e-07		0.420765	1.33354e-06		0.420765	2.07655e-06		0.420765	2.22861e-06		0.420765	2.40143e-06		0.420765	2.5073e-06
0.423659	1.03586e-06		0.423659	1.45581e-06		0.423659	2.07384e-06		0.423659	2.22493e-06		0.423659	2.39698e-06		0.423659	2.5013e-06
0.426553	1.10487e-06		0.426553	1.59323e-06		0.426553	2.07111e-06		0.426553	2.22122e-06		0.426553	2.39248e-06		0.426553	2.49531e-06
0.429447	1.17961e-06		0.429447	1.74239e-06		0.429447	2.06835e-06		0.429447	2.21748e-06		0.429447	2.38792e-06		0.429447	2.48936e-06
0.432341	1.26176e-06		0.432341	1.89702e-06		0.432341	2.06558e-06		0.432341	2.21371e-06		0.432341	2.38331e-06		0.432341	2.48341e-06
0.435235	1.35452e-06		0.435235	2.059e-06		0.435235	2.06278e-06		0.435235	2.20992e-06		0.435235	2.37866e-06		0.435235	2.47742e-06
0.438129	1.46261e-06		0.438129	2.22327e-06		0.438129	2.05997e-06		0.438129	2.20611e-06		0.438129	2.37398e-06		0.438129	2.47141e-06
0.441023	1.58738e-06		0.441023	2.38476e-06		0.441023	2.05715e-06		0.441023	2.20229e-06		0.441023	2.36925e-06		0.441023	2.46538e-06
0.443916	1.72611e-06		0.443916	2.54429e-06		0.443916	2.05431e-06		0.443916	2.19845e-06		0.443916	2.3645e-06		0.443916	2.45934e-06
0.44681	1.87582e-06		0.44681	2.69984e-06		0.44681	2.05147e-06		0.44681	2.19459e-06		0.44681	2.35972e-06		0.44681	2.45329e-06
0.449704	2.03221e-06		0.449704	2.84853e-06		0.449704	2.04861e-06		0.449704	2.19073e-06		0.449704	2.35492e-06		0.449704	2.44724e-06
0.452598	2.19211e-06		0.452598	2.99051e-06		0.452598	2.04574e-06		0.452598	2.18686e-06		0.452598	2.35009e-06		0.452598	2.4412e-06
0.455492	2.35085e-06		0.455492	3.12534e-06		0.455492	2.04287e-06		0.455492	2.18298e-06		0.455492	2.34523e-06		0.455492	2.43517e-06
0.458386	2.50581e-06		0.458386	3.25124e-06		0.458386	2.03998e-06		0.458386	2.17909e-06		0.458386	2.34035e-06		0.458386	2.42916e-06
0.46128	2.65635e-06		0.46128	3.36808e-06		0.46128	2.03709e-06		0.46128	2.1752e-06		0.46128	2.33545e-06		0.46128	2.42317e-06
0.464174	2.8006e-06		0.464174	3.47513e-06		0.464174	2.0342e-06		0.464174	2.17131e-06		0.464174	2.33053e-06		0.464174	2.41722e-06
0.467068	2.93755e-06		0.467068	3.57223e-06		0.467068	2.0313e-06		0.467068	2.16742e-06		0.467068	2.32561e-06		0.467068	2.41131e-06
0.469961	3.06545e-06		0.469961	3.6598e-06		0.469961	2.02839e-06		0.469961	2.16352e-06		0.469961	2.32068e-06		0.469961	2.40542e-06
0.472855	3.18438e-06		0.472855	3.73779e-06		0.472855	2.02548e-06		0.472855	2.15963e-06		0.472855	2.31575e-06		0.472855	2.39954e-06
0.475749	3.29409e-06		0.475749	3.80687e-06		0.475749	2.02257e-06		0.475749	2.15574e-06		0.475749	2.31083e-06		0.475749	2.39365e-06
0.478643	3.394e-06		0.478643	3.86798e-06		0.478643	2.01966e-06		0.478643	2.15184e-06		0.478643	2.3059e-06		0.478643	2.38777e-06
0.481537	3.4843e-06		0.481537	3.92141e-06		0.481537	2.01674e-06		0.481537	2.14795e-06		0.481537	2.30097e-06		0.481537	2.3819e-06
0.484431	3.56534e-06		0.484431	3.96584e-06		0.484431	2.01383e-06		0.484431	2.14406e-06		0.484431	2.29605e-06		0.484431	2.37604e-06
0.487325	3.63661e-06		0.487325	4.0014e-06		0.487325	2.01091e-06		0.487325	2.14018e-06		0.487325	2.29112e-06		0.487325	2.37019e-06
0.490219	3.69842e-06		0.490219	4.0301e-06		0.490219	2.008e-06		0.490219	2.1363e-06		0.490219	2.28619e-06		0.490219	2.36435e-06
0.493113	3.75127e-06		0.493113	4.05266e-06		0.493113	2.00509e-06		0.493113	2.13242e-06		0.493113	2.28126e-06		0.493113	2.35853e-06
0.496006	3.79452e-06		0.496006	4.07013e-06		0.496006	2.00218e-06		0.496006	2.12855e-06		0.496006	2.27633e-06		0.496006	2.35272e-06
0.4989	3.82949e-06		0.4989	4.08135e-06		0.4989	1.99928e-06		0.4989	2.12469e-06		0.4989	2.2714e-06		0.4989	2.34692e-06
0.501794	3.85732e-06		0.501794	4.08558e-06		0.501794	1.99637e-06		0.501794	2.12084e-06		0.501794	2.26646e-06		0.501794	2.34113e-06
0.504688	3.87761e-06		0.504688	4.08395e-06		0.504688	1.99346e-06		0.504688	2.117e-06		0.504688	2.26151e-06		0.504688	2.33535e-06
0.507582	3.89142e-06		0.507582	4.07731e-06		0.507582	1.99055e-06		0.507582	2.11316e-06		0.507582	2.25656e-06		0.507582	2.3296e-06
0.510476	3.89912e-06		0.510476	4.06652e-06		0.510476	1.98764e-06		0.510476	2.10933e-06		0.510476	2.25163e-06		0.510476	2.32386e-06
0.51337	3.90147e-06		0.51337	4.05207e-06		0.51337	1.98474e-06		0.51337	2.10552e-06		0.51337	2.24675e-06		0.51337	2.31814e-06
0.516264	3.89973e-06		0.516264	4.03492e-06		0.516264	1.98183e-06		0.516264	2.10171e-06		0.516264	2.24191e-06		0.516264	2.31242e-06
0.519158	3.89259e-06		0.519158	4.01494e-06		0.519158	1.97893e-06		0.519158	2.09792e-06		0.519158	2.23713e-06		0.519158	2.30672e-06
0.522051	3.88034e-06		0.522051	3.99296e-06		0.522051	1.97603e-06		0.522051	2.09413e-06		0.522051	2.23242e-06		0.522051	2.30101e-06
0.524945	3.86427e-06		0.524945	3.96885e-06		0.524945	1.97313e-06		0.524945	2.09036e-06		0.524945	2.22778e-06		0.524945	2.29529e-06
0.524945	3.86427e-06		0.524945	3.96885e-06		0.524945	1.97313e-06		0.524945	2.09036e-06		0.524945	2.22778e-06		0.524945	2.29529e-06
0.527839	3.84502e-06		0.527839	3.9421e-06		0.527839	1.97023e-06		0.527839	2.08658e-06		0.527839	2.22318e-06		0.527839	2.28959e-06
0.530733	3.82282e-06		0.530733	3.91354e-06		0.530733	1.96734e-06		0.530733	2.08281e-06		0.530733	2.21859e-06		0.530733	2.28393e-06
0.533627	3.79767e-06		0.533627	3.88333e-06		0.533627	1.96444e-06		0.533627	2.07903e-06		0.533627	2.21401e-06		0.533627	2.27832e-06
0.536521	3.76958e-06		0.536521	3.85143e-06		0.536521	1.96155e-06		0.536521	2.07526e-06		0.536521	2.20943e-06		0.536521	2.27277e-06
0.539415	3.73858e-06		0.539415	3.8183e-06		0.539415	1.95867e-06		0.539415	2.07148e-06		0.539415	2.20485e-06		0.539415	2.26727e-06
0.542309	3.70583e-06		0.542309	3.78434e-06		0.542309	1.95578e-06		0.542309	2.0677e-06		0.542309	2.20026e-06		0.542309	2.26181e-06
0.545203	3.67206e-06		0.545203	3.74951e-06		0.545203	1.9529e-06		0.545203	2.06392e-06		0.545203	2.19566e-06		0.545203	2.25637e-06
0.548096	3.63708e-06		0.548096	3.71382e-06		0.548096	1.95001e-06		0.548096	2.06013e-06		0.548096	2.19105e-06		0.548096	2.25096e-06
0.55099	3.60077e-06		0.55099	3.67784e-06		0.55099	1.94713e-06		0.55099	2.05635e-06		0.55099	2.18642e-06		0.55099	2.24557e-06
0.553884	3.56349e-06		0.553884	3.64183e-06		0.553884	1.94425e-06		0.553884	2.05257e-06		0.553884	2.18178e-06		0.553884	2.2402e-06
0.556778	3.52575e-06		0.556778	3.6057e-06		0.556778	1.94137e-06		0.556778	2.04879e-06		0.556778	2.17714e-06		0.556778	2.23486e-06
0.559672	3.48767e-06		0.559672	3.56952e-06		0.559672	1.93849e-06		0.559672	2.04501e-06		0.559672	2.17251e-06		0.559672	2.22954e-06
0.562566	3.44967e-06		0.562566	3.53335e-06		0.562566	1.93561e-06		0.562566	2.04123e-06		0.562566	2.16789e-06		0.562566	2.22424e-06
0.56546	3.41179e-06		0.56546	3.49754e-06		0.56546	1.93272e-06		0.56546	2.03744e-06		0.56546	2.16327e-06		0.56546	2.21897e-06
0.568354	3.37371e-06		0.568354	3.46218e-06		0.568354	1.92984e-06		0.568354	2.03366e-06		0.568354	2.15865e-06		0.568354	2.21373e-06
0.571248	3.33543e-06		0.571248	3.42726e-06		0.571248	1.92695e-06		0.571248	2.02988e-06		0.571248	2.15404e-06		0.571248	2.20851e-06
0.574142	3.29713e-06		0.574142	3.39273e-06		0.574142	1.92407e-06		0.574142	2.02609e-06		0.574142	2.14942e-06		0.574142	2.20332e-06
0.577035	3.25956e-06		0.577035	3.35834e-06		0.577035	1.92119e-06		0.577035	2.0223e-06		0.577035	2.14481e-06		0.577035	2.19816e-06
0.579929	3.22308e-06		0.579929	3.32455e-06		0.579929	1.91831e-06		0.579929	2.01851e-06		0.579929	2.1402e-06		0.579929	2.19302e-06
0.582823	3.1874e-06		0.582823	3.2918e-06		0.582823	1.91542e-06		0.582823	2.01472e-06		0.582823	2.13559e-06		0.582823	2.18789e-06
0.585717	3.15209e-06		0.585717	3.25978e-06		0.585717	1.91254e-06		0.585717	2.01094e-06		0.585717	2.13098e-06		0.585717	2.18279e-06
0.588611	3.11679e-06		0.588611	3.22822e-06		0.588611	1.90966e-06		0.588611	2.00716e-06		0.588611	2.12637e-06		0.588611	2.1777e-06
0.591505	3.08217e-06		0.591505	3.19713e-06		0.591505	1.90678e-06		0.591505	2.0034e-06		0.591505	2.12176e-06		0.591505	2.17263e-06
0.594399	3.04895e-06		0.594399	3.16646e-06		0.594399	1.9039e-06		0.594399	1.99965e-06		0.594399	2.11715e-06		0.594399	2.16758e-06
0.597293	3.01688e-06		0.597293	3.13628e-06		0.597293	1.90102e-06		0.597293	1.99591e-06		0.597293	2.11253e-06		0.597293	2.16255e-06
0.600186	2.98551e-06		0.600186	3.1071e-06		0.600186	1.89813e-06		0.600186	1.99218e-06		0.600186	2.10793e-06		0.600186	2.15753e-06
0.60308	2.95455e-06		0.60308	3.07902e-06		0.60308	1.89525e-06		0.60308	1.98847e-06		0.60308	2.10334e-06		0.60308	2.15254e-06
0.605974	2.92378e-06		0.605974	3.05173e-06		0.605974	1.89238e-06		0.605974	1.98477e-06		0.605974	2.09877e-06		0.605974	2.14756e-06
0.608868	2.89331e-06		0.608868	3.02507e-06		0.608868	1.8895e-06		0.608868	1.98108e-06		0.608868	2.09423e-06		0.608868	2.14261e-06
0.611762	2.86392e-06		0.611762	2.99894e-06		0.611762	1.88662e-06		0.611762	1.97741e-06		0.611762	2.08971e-06		0.611762	2.13767e-06
0.614656	2.83595e-06		0.614656	2.97327e-06		0.614656	1.88374e-06		0.614656	1.97375e-06		0.614656	2.08521e-06		0.614656	2.13276e-06
0.61755	2.80906e-06		0.61755	2.94795e-06		0.61755	1.88086e-06		0.61755	1.97011e-06		0.61755	2.08075e-06		0.61755	2.12786e-06
0.620444	2.78294e-06		0.620444	2.92293e-06		0.620444	1.87798e-06		0.620444	1.96648e-06		0.620444	2.07631e-06		0.620444	2.12299e-06
0.623338	2.75731e-06		0.623338	2.89828e-06		0.623338	1.87511e-06		0.623338	1.96288e-06		0.623338	2.0719e-06		0.623338	2.11813e-06
0.626231	2.7321e-06		0.626231	2.87437e-06		0.626231	1.87223e-06		0.626231	1.95929e-06		0.626231	2.06752e-06		0.626231	2.11329e-06
0.629125	2.70729e-06		0.629125	2.85145e-06		0.629125	1.86935e-06		0.629125	1.95572e-06		0.629125	2.06318e-06		0.629125	2.10847e-06
0.632019	2.68284e-06		0.632019	2.82933e-06		0.632019	1.86647e-06		0.632019	1.95218e-06		0.632019	2.05888e-06		0.632019	2.10366e-06
0.634913	2.65873e-06		0.634913	2.80785e-06		0.634913	1.86359e-06		0.634913	1.94866e-06		0.634913	2.05462e-06		0.634913	2.09887e-06
0.637807	2.63513e-06		0.637807	2.78684e-06		0.637807	1.86072e-06		0.637807	1.94516e-06		0.637807	2.0504e-06		0.637807	2.0941e-06
0.640701	2.61235e-06		0.640701	2.76613e-06		0.640701	1.85786e-06		0.640701	1.94169e-06		0.640701	2.04624e-06		0.640701	2.08934e-06
0.643595	2.59017e-06		0.643595	2.74549e-06		0.643595	1.85505e-06		0.643595	1.93825e-06		0.643595	2.04216e-06		0.643595	2.0846e-06
0.643595	2.59017e-06		0.643595	2.74549e-06		0.643595	1.85505e-06		0.643595	1.93825e-06		0.643595	2.04216e-06		0.643595	2.0846e-06
0.646489	2.56852e-06		0.646489	2.72498e-06		0.646489	1.85226e-06		0.646489	1.93482e-06		0.646489	2.03812e-06		0.646489	2.07987e-06
0.649383	2.54749e-06		0.649383	2.70491e-06		0.649383	1.84949e-06		0.649383	1.9314e-06		0.649383	2.03411e-06		0.649383	2.07515e-06
0.652277	2.52695e-06		0.652277	2.68531e-06		0.652277	1.84674e-06		0.652277	1.92799e-06		0.652277	2.03011e-06		0.652277	2.07044e-06
0.65517	2.50695e-06		0.65517	2.66619e-06		0.65517	1.844e-06		0.65517	1.92459e-06		0.65517	2.02614e-06		0.65517	2.06574e-06
0.658064	2.48756e-06		0.658064	2.64752e-06		0.658064	1.84126e-06		0.658064	1.9212e-06		0.658064	2.02218e-06		0.658064	2.06104e-06
0.660958	2.46873e-06		0.660958	2.62933e-06		0.660958	1.83853e-06		0.660958	1.91781e-06		0.660958	2.01822e-06		0.660958	2.05634e-06
0.663852	2.45047e-06		0.663852	2.61166e-06		0.663852	1.83581e-06		0.663852	1.91442e-06		0.663852	2.01427e-06		0.663852	2.05164e-06
0.666746	2.43282e-06		0.666746	2.59449e-06		0.666746	1.83309e-06		0.666746	1.91104e-06		0.666746	2.01033e-06		0.666746	2.04696e-06
0.66964	2.41572e-06		0.66964	2.57783e-06		0.66964	1.83037e-06		0.66964	1.90766e-06		0.66964	2.00639e-06		0.66964	2.04229e-06
0.672534	2.3991e-06		0.672534	2.56167e-06		0.672534	1.82765e-06		0.672534	1.90428e-06		0.672534	2.00244e-06		0.672534	2.03763e-06
0.675428	2.38298e-06		0.675428	2.54598e-06		0.675428	1.82493e-06		0.675428	1.9009e-06		0.675428	1.9985e-06		0.675428	2.03298e-06
0.678322	2.36741e-06		0.678322	2.53069e-06		0.678322	1.82221e-06		0.678322	1.89753e-06		0.678322	1.99455e-06		0.678322	2.02834e-06
0.681215	2.35231e-06		0.681215	2.5158e-06		0.681215	1.81949e-06		0.681215	1.89416e-06		0.681215	1.99061e-06		0.681215	2.02371e-06
0.684109	2.33768e-06		0.684109	2.50133e-06		0.684109	1.81677e-06		0.684109	1.89078e-06		0.684109	1.98666e-06		0.684109	2.01909e-06
0.687003	2.32354e-06		0.687003	2.48722e-06		0.687003	1.81404e-06		0.687003	1.8874e-06		0.687003	1.9827e-06		0.687003	2.01448e-06
0.689897	2.30986e-06		0.689897	2.47343e-06		0.689897	1.81132e-06		0.689897	1.88402e-06		0.689897	1.97874e-06		0.689897	2.00987e-06
0.692791	2.29659e-06		0.692791	2.45996e-06		0.692791	1.80858e-06		0.692791	1.88064e-06		0.692791	1.97476e-06		0.692791	2.00527e-06
0.695685	2.28367e-06		0.695685	2.44685e-06		0.695685	1.80584e-06		0.695685	1.87725e-06		0.695685	1.97077e-06		0.695685	2.00066e-06
0.698579	2.27112e-06		0.698579	2.43406e-06		0.698579	1.8031e-06		0.698579	1.87385e-06		0.698579	1.96677e-06		0.698579	1.99606e-06
0.701473	2.25895e-06		0.701473	2.42154e-06		0.701473	1.80034e-06		0.701473	1.87044e-06		0.701473	1.96275e-06		0.701473	1.99146e-06
0.704367	2.24713e-06		0.704367	2.40925e-06		0.704367	1.79757e-06		0.704367	1.86703e-06		0.704367	1.95873e-06		0.704367	1.98686e-06
0.70726	2.2356e-06		0.70726	2.3972e-06		0.70726	1.7948e-06		0.70726	1.86364e-06		0.70726	1.9547e-06		0.70726	1.98226e-06
0.710154	2.2243e-06		0.710154	2.38542e-06		0.710154	1.792e-06		0.710154	1.86026e-06		0.710154	1.95066e-06		0.710154	1.97766e-06
0.713048	2.21325e-06		0.713048	2.37387e-06		0.713048	1.7892e-06		0.713048	1.85689e-06		0.713048	1.9466e-06		0.713048	1.97308e-06
0.715942	2.20247e-06		0.715942	2.3625e-06		0.715942	1.78641e-06		0.715942	1.85354e-06		0.715942	1.94251e-06		0.715942	1.96854e-06
0.715942	2.20247e-06		0.715942	2.3625e-06		0.715942	1.78641e-06		0.715942	1.85354e-06		0.715942	1.94251e-06		0.715942	1.96854e-06
0.718836	2.19195e-06		0.718836	2.35131e-06		0.718836	1.78363e-06		0.718836	1.85019e-06		0.718836	1.9384e-06		0.718836	1.96399e-06
0.72173	2.18169e-06		0.72173	2.34032e-06		0.72173	1.78086e-06		0.72173	1.84684e-06		0.72173	1.93428e-06		0.72173	1.95942e-06
0.724624	2.17167e-06		0.724624	2.32952e-06		0.724624	1.77809e-06		0.724624	1.84348e-06		0.724624	1.93014e-06		0.724624	1.95483e-06
0.727518	2.16185e-06		0.727518	2.31894e-06		0.727518	1.77533e-06		0.727518	1.84011e-06		0.727518	1.92598e-06		0.727518	1.95019e-06
0.730412	2.15222e-06		0.730412	2.30855e-06		0.730412	1.77256e-06		0.730412	1.83672e-06		0.730412	1.92181e-06		0.730412	1.94552e-06
0.733305	2.14278e-06		0.733305	2.29833e-06		0.733305	1.76978e-06		0.733305	1.83331e-06		0.733305	1.9176e-06		0.733305	1.9408e-06
0.736199	2.13352e-06		0.736199	2.28823e-06		0.736199	1.767e-06		0.736199	1.82988e-06		0.736199	1.91337e-06		0.736199	1.93602e-06
0.739093	2.12443e-06		0.739093	2.27823e-06		0.739093	1.7642e-06		0.739093	1.82641e-06		0.739093	1.90911e-06		0.739093	1.93118e-06
0.741987	2.1155e-06		0.741987	2.26832e-06		0.741987	1.76138e-06		0.741987	1.8229e-06		0.741987	1.90481e-06		0.741987	1.92627e-06
0.744881	2.10672e-06		0.744881	2.25854e-06		0.744881	1.75854e-06		0.744881	1.81935e-06		0.744881	1.90046e-06		0.744881	1.92128e-06
0.747775	2.09804e-06		0.747775	2.24884e-06		0.747775	1.75567e-06		0.747775	1.81574e-06		0.747775	1.89607e-06		0.747775	1.9162e-06
0.750669	2.08946e-06		0.750669	2.2392e-06		0.750669	1.75276e-06		0.750669	1.81207e-06		0.750669	1.89162e-06		0.750669	1.911e-06
0.753563	2.08097e-06		0.753563	2.2296e-06		0.753563	1.7498e-06		0.753563	1.80833e-06		0.753563	1.88711e-06		0.753563	1.90569e-06
0.756457	2.07258e-06		0.756457	2.22e-06		0.756457	1.74678e-06		0.756457	1.80449e-06		0.756457	1.88248e-06		0.756457	1.90023e-06
0.75935	2.06424e-06		0.75935	2.21037e-06		0.75935	1.74369e-06		0.75935	1.80056e-06		0.75935	1.87769e-06		0.75935	1.89461e-06
0.762244	2.05593e-06		0.762244	2.20069e-06		0.762244	1.74052e-06		0.762244	1.79653e-06		0.762244	1.87271e-06		0.762244	1.88882e-06
0.765138	2.04761e-06		0.765138	2.19094e-06		0.765138	1.73725e-06		0.765138	1.79235e-06		0.765138	1.86753e-06		0.765138	1.88283e-06
0.768032	2.03925e-06		0.768032	2.18111e-06		0.768032	1.73387e-06		0.768032	1.78801e-06		0.768032	1.86215e-06		0.768032	1.87662e-06
0.770926	2.03081e-06		0.770926	2.17116e-06		0.770926	1.73037e-06		0.770926	1.78349e-06		0.770926	1.85653e-06		0.770926	1.87018e-06
0.77382	2.02227e-06		0.77382	2.16105e-06		0.77382	1.72674e-06		0.77382	1.77877e-06		0.77382	1.85067e-06		0.77382	1.86349e-06
0.776714	2.01365e-06		0.776714	2.15075e-06		0.776714	1.72296e-06		0.776714	1.77384e-06		0.776714	1.84456e-06		0.776714	1.85655e-06
0.779608	2.00493e-06		0.779608	2.14022e-06		0.779608	1.71903e-06		0.779608	1.76869e-06		0.779608	1.83818e-06		0.779608	1.84933e-06
0.782502	1.9961e-06		0.782502	2.12945e-06		0.782502	1.71493e-06		0.782502	1.76332e-06		0.782502	1.83154e-06		0.782502	1.84183e-06
0.785396	1.98713e-06		0.785396	2.11847e-06		0.785396	1.71065e-06		0.785396	1.75772e-06		0.785396	1.82463e-06		0.785396	1.83405e-06
0.788289	1.97801e-06		0.788289	2.10728e-06		0.788289	1.70617e-06		0.788289	1.7519e-06		0.788289	1.81745e-06		0.788289	1.82599e-06
0.791183	1.96872e-06		0.791183	2.09592e-06		0.791183	1.70149e-06		0.791183	1.74585e-06		0.791183	1.81e-06		0.791183	1.81763e-06
0.794077	1.95928e-06		0.794077	2.08439e-06		0.794077	1.69662e-06		0.794077	1.73957e-06		0.794077	1.8023e-06		0.794077	1.80896e-06
0.796971	1.94973e-06		0.796971	2.07274e-06		0.796971	1.69154e-06		0.796971	1.73308e-06		0.796971	1.79433e-06		0.796971	1.79997e-06
0.799865	1.94012e-06		0.799865	2.061e-06		0.799865	1.68625e-06		0.799865	1.72636e-06		0.799865	1.7861e-06		0.799865	1.79068e-06
0.799865	1.94012e-06		0.799865	2.061e-06		0.799865	1.68625e-06		0.799865	1.72636e-06		0.799865	1.7861e-06		0.799865	1.79068e-06
0.802759	1.93041e-06		0.802759	2.04916e-06		0.802759	1.68072e-06		0.802759	1.7194e-06		0.802759	1.77756e-06		0.802759	1.78107e-06
0.805653	1.9206e-06		0.805653	2.0372e-06		0.805653	1.67492e-06		0.805653	1.71216e-06		0.805653	1.76866e-06		0.805653	1.7711e-06
0.808547	1.91071e-06		0.808547	2.02516e-06		0.808547	1.66882e-06		0.808547	1.70462e-06		0.808547	1.75939e-06		0.808547	1.76079e-06
0.811441	1.90075e-06		0.811441	2.01305e-06		0.811441	1.66241e-06		0.811441	1.69676e-06		0.811441	1.74977e-06		0.811441	1.75015e-06
0.814334	1.89074e-06		0.814334	2.00085e-06		0.814334	1.65568e-06		0.814334	1.68856e-06		0.814334	1.73978e-06		0.814334	1.73917e-06
0.817228	1.8807e-06		0.817228	1.98855e-06		0.817228	1.64861e-06		0.817228	1.68004e-06		0.817228	1.72943e-06		0.817228	1.72786e-06
0.820122	1.87064e-06		0.820122	1.97615e-06		0.820122	1.64121e-06		0.820122	1.67117e-06		0.820122	1.71873e-06		0.820122	1.71624e-06
0.823016	1.86057e-06		0.823016	1.96365e-06		0.823016	1.63345e-06		0.823016	1.66196e-06		0.823016	1.70766e-06		0.823016	1.7043e-06
0.82591	1.85048e-06		0.82591	1.95102e-06		0.82591	1.62531e-06		0.82591	1.65242e-06		0.82591	1.69625e-06		0.82591	1.69208e-06
0.828804	1.84036e-06		0.828804	1.93825e-06		0.828804	1.61675e-06		0.828804	1.64255e-06		0.828804	1.68449e-06		0.828804	1.6796e-06
0.831698	1.83021e-06		0.831698	1.92532e-06		0.831698	1.60776e-06		0.831698	1.63236e-06		0.831698	1.67241e-06		0.831698	1.66688e-06
0.834592	1.82002e-06		0.834592	1.91222e-06		0.834592	1.59836e-06		0.834592	1.62185e-06		0.834592	1.66002e-06		0.834592	1.65395e-06
0.837486	1.80983e-06		0.837486	1.899e-06		0.837486	1.58855e-06		0.837486	1.611e-06		0.837486	1.64734e-06		0.837486	1.64085e-06
0.840379	1.79968e-06		0.840379	1.88576e-06		0.840379	1.57837e-06		0.840379	1.59986e-06		0.840379	1.63443e-06		0.840379	1.62762e-06
0.843273	1.78958e-06		0.843273	1.87251e-06		0.843273	1.56784e-06		0.843273	1.58845e-06		0.843273	1.62133e-06		0.843273	1.61433e-06
0.846167	1.77957e-06		0.846167	1.85928e-06		0.846167	1.55702e-06		0.846167	1.57682e-06		0.846167	1.60809e-06		0.846167	1.601e-06
0.849061	1.76963e-06		0.849061	1.8461e-06		0.849061	1.54594e-06		0.849061	1.56503e-06		0.849061	1.59477e-06		0.849061	1.58769e-06
0.851955	1.75978e-06		0.851955	1.83303e-06		0.851955	1.53465e-06		0.851955	1.55316e-06		0.851955	1.58144e-06		0.851955	1.57445e-06
0.854849	1.75004e-06		0.854849	1.82017e-06		0.854849	1.52318e-06		0.854849	1.54126e-06		0.854849	1.56818e-06		0.854849	1.56138e-06
0.857743	1.74052e-06		0.857743	1.80764e-06		0.857743	1.51166e-06		0.857743	1.52943e-06		0.857743	1.55512e-06		0.857743	1.54857e-06
0.860637	1.73138e-06		0.860637	1.79554e-06		0.860637	1.50022e-06		0.860637	1.51778e-06		0.860637	1.54239e-06		0.860637	1.53615e-06
0.863531	1.72271e-06		0.863531	1.78398e-06		0.863531	1.48903e-06		0.863531	1.50648e-06		0.863531	1.53013e-06		0.863531	1.52424e-06
0.866424	1.71465e-06		0.866424	1.77313e-06		0.866424	1.47833e-06		0.866424	1.49575e-06		0.866424	1.51854e-06		0.866424	1.51305e-06
0.869318	1.70742e-06		0.869318	1.76325e-06		0.869318	1.46845e-06		0.869318	1.48589e-06		0.869318	1.50792e-06		0.869318	1.50288e-06
0.872212	1.70131e-06		0.872212	1.75483e-06		0.872212	1.45987e-06		0.872212	1.4774e-06		0.872212	1.49879e-06		0.872212	1.4942e-06
0.875106	1.69684e-06		0.875106	1.74863e-06		0.875106	1.4534e-06		0.875106	1.47104e-06		0.875106	1.49201e-06		0.875106	1.48776e-06
0.878	1.69512e-06		0.878	1.74622e-06		0.878	1.45081e-06		0.878	1.46852e-06		0.878	1.48934e-06		0.878	1.48523e-06

## Sheet: no distribution 
SN 0			SN 0.2			SN 0.4			SN 0.6			SN 0.8			SN 1
Axial distance	no mass fraction		Axial distance	no mass fraction		Axial distance	no mass fraction		Axial distance	no mass fraction		Axial distance	no mass fraction		Axial distance	no mass fraction
0.00115113	2.49594e-06		0.00115113	2.42763e-06		0.00115113	1.99084e-06		0.00115113	2.57219e-07		0.00115113	1.75835e-07		0.00115113	1.31794e-07
0.00404502	3.46687e-06		0.00404502	3.35517e-06		0.00404502	2.47449e-06		0.00404502	3.48604e-07		0.00404502	1.99652e-07		0.00404502	1.46369e-07
0.00693891	4.56163e-06		0.00693891	4.39668e-06		0.00693891	2.86649e-06		0.00693891	4.50443e-07		0.00693891	2.17444e-07		0.00693891	1.54139e-07
0.0098328	5.81876e-06		0.0098328	5.57817e-06		0.0098328	3.13931e-06		0.0098328	5.48085e-07		0.0098328	2.30276e-07		0.0098328	1.54682e-07
0.0127267	7.21718e-06		0.0127267	6.85667e-06		0.0127267	3.29193e-06		0.0127267	6.28204e-07		0.0127267	2.38379e-07		0.0127267	1.50225e-07
0.0156206	8.70896e-06		0.0156206	8.16239e-06		0.0156206	3.35671e-06		0.0156206	6.85814e-07		0.0156206	2.41267e-07		0.0156206	1.42331e-07
0.0185145	1.02224e-05		0.0185145	9.40779e-06		0.0185145	3.38194e-06		0.0185145	7.20621e-07		0.0185145	2.39244e-07		0.0185145	1.31474e-07
0.0214084	1.16697e-05		0.0214084	1.05005e-05		0.0214084	3.4079e-06		0.0214084	7.33966e-07		0.0214084	2.3284e-07		0.0214084	1.19793e-07
0.0243023	1.29684e-05		0.0243023	1.13706e-05		0.0243023	3.45056e-06		0.0243023	7.28599e-07		0.0243023	2.2214e-07		0.0243023	1.08704e-07
0.0271961	1.40551e-05		0.0271961	1.1985e-05		0.0271961	3.50578e-06		0.0271961	7.11345e-07		0.0271961	2.07648e-07		0.0271961	9.89168e-08
0.03009	1.48895e-05		0.03009	1.23403e-05		0.03009	3.5614e-06		0.03009	6.84392e-07		0.03009	1.91945e-07		0.03009	9.26129e-08
0.0329839	1.54551e-05		0.0329839	1.24562e-05		0.0329839	3.60577e-06		0.0329839	6.50361e-07		0.0329839	1.77625e-07		0.0329839	9.11059e-08
0.0358778	1.57626e-05		0.0358778	1.23722e-05		0.0358778	3.63405e-06		0.0358778	6.11662e-07		0.0358778	1.68103e-07		0.0358778	9.42704e-08
0.0387717	1.58393e-05		0.0387717	1.21323e-05		0.0387717	3.64495e-06		0.0387717	5.67302e-07		0.0387717	1.66403e-07		0.0387717	1.02867e-07
0.0416656	1.5719e-05		0.0416656	1.17801e-05		0.0416656	3.63735e-06		0.0416656	5.22549e-07		0.0416656	1.7497e-07		0.0416656	1.18002e-07
0.0445595	1.54481e-05		0.0445595	1.13602e-05		0.0445595	3.61265e-06		0.0445595	4.89092e-07		0.0445595	2.00033e-07		0.0445595	1.40918e-07
0.0474534	1.50636e-05		0.0474534	1.0915e-05		0.0474534	3.57341e-06		0.0474534	4.8422e-07		0.0474534	2.55823e-07		0.0474534	1.73012e-07
0.0503473	1.45912e-05		0.0503473	1.04846e-05		0.0503473	3.52158e-06		0.0503473	5.40661e-07		0.0503473	3.70784e-07		0.0503473	2.16149e-07
0.0532412	1.4062e-05		0.0532412	1.01062e-05		0.0532412	3.45945e-06		0.0532412	7.65156e-07		0.0532412	6.13466e-07		0.0532412	2.74671e-07
0.056135	1.35119e-05		0.056135	9.81232e-06		0.056135	3.38948e-06		0.056135	1.44147e-06		0.056135	1.15093e-06		0.056135	3.59981e-07
0.0590289	1.29718e-05		0.0590289	9.625e-06		0.0590289	3.31652e-06		0.0590289	3.24658e-06		0.0590289	2.40057e-06		0.0590289	5.02435e-07
0.0619228	1.24637e-05		0.0619228	9.55199e-06		0.0619228	3.23841e-06		0.0619228	7.28304e-06		0.0619228	5.25971e-06		0.0619228	7.79877e-07
0.0648167	1.2012e-05		0.0648167	9.58813e-06		0.0648167	3.14955e-06		0.0648167	1.53417e-05		0.0648167	1.1055e-05		0.0648167	1.37955e-06
0.0677106	1.16377e-05		0.0677106	9.72175e-06		0.0677106	3.05159e-06		0.0677106	2.99858e-05		0.0677106	2.15742e-05		0.0677106	2.72606e-06
0.0706045	1.13544e-05		0.0706045	9.93874e-06		0.0706045	2.94675e-06		0.0706045	5.71807e-05		0.0706045	4.10998e-05		0.0706045	5.64747e-06
0.0734984	1.11722e-05		0.0734984	1.02243e-05		0.0734984	2.83645e-06		0.0734984	0.000105481		0.0734984	7.65878e-05		0.0734984	1.15151e-05
0.0763923	1.10946e-05		0.0763923	1.0559e-05		0.0763923	2.72227e-06		0.0763923	0.00018028		0.0763923	0.000135056		0.0763923	2.22303e-05
0.0792862	1.11177e-05		0.0792862	1.09206e-05		0.0792862	2.60975e-06		0.0792862	0.000278473		0.0792862	0.000219459		0.0792862	3.99768e-05
0.0821801	1.12349e-05		0.0821801	1.12892e-05		0.0821801	2.52564e-06		0.0821801	0.000387157		0.0821801	0.000324081		0.0821801	6.94417e-05
0.085074	1.14416e-05		0.085074	1.16472e-05		0.085074	2.5374e-06		0.085074	0.000487251		0.085074	0.000432665		0.085074	0.000116054
0.085074	1.14416e-05		0.085074	1.16472e-05		0.085074	2.5374e-06		0.085074	0.000487251		0.085074	0.000432665		0.085074	0.000116054
0.0879678	1.17321e-05		0.0879678	1.19799e-05		0.0879678	2.83363e-06		0.0879678	0.000513605		0.0879678	0.000481127		0.0879678	0.000181564
0.0908617	1.20982e-05		0.0908617	1.22766e-05		0.0908617	3.91708e-06		0.0908617	0.000460877		0.0908617	0.00044595		0.0908617	0.00026224
0.0937556	1.25301e-05		0.0937556	1.2531e-05		0.0937556	6.87572e-06		0.0937556	0.00039432		0.0937556	0.000382776		0.0937556	0.000348368
0.0966495	1.30158e-05		0.0966495	1.27407e-05		0.0966495	1.3521e-05		0.0966495	0.000335007		0.0966495	0.000324771		0.0966495	0.000423172
0.0995434	1.35419e-05		0.0995434	1.29067e-05		0.0995434	2.64662e-05		0.0995434	0.000286617		0.0995434	0.000278574		0.0995434	0.000442032
0.102437	1.40944e-05		0.102437	1.30333e-05		0.102437	4.97815e-05		0.102437	0.000246712		0.102437	0.00024254		0.102437	0.000406131
0.105331	1.46582e-05		0.105331	1.31262e-05		0.105331	8.83787e-05		0.105331	0.000213718		0.105331	0.000214533		0.105331	0.000360014
0.108225	1.52185e-05		0.108225	1.31945e-05		0.108225	0.00014615		0.108225	0.000186579		0.108225	0.000192497		0.108225	0.000317998
0.111119	1.57711e-05		0.111119	1.32453e-05		0.111119	0.000224344		0.111119	0.000164285		0.111119	0.000175083		0.111119	0.000284417
0.114013	1.62952e-05		0.114013	1.32867e-05		0.114013	0.000320279		0.114013	0.000146056		0.114013	0.000161443		0.114013	0.000257806
0.116907	1.67785e-05		0.116907	1.33289e-05		0.116907	0.000427774		0.116907	0.000131138		0.116907	0.000150724		0.116907	0.000236778
0.119801	1.72162e-05		0.119801	1.3381e-05		0.119801	0.000537836		0.119801	0.000118954		0.119801	0.000142303		0.119801	0.000220172
0.122695	1.75977e-05		0.122695	1.34526e-05		0.122695	0.000620096		0.122695	0.000109043		0.122695	0.000135701		0.122695	0.000207019
0.125588	1.79278e-05		0.125588	1.35493e-05		0.125588	0.000634702		0.125588	0.000100986		0.125588	0.000130539		0.125588	0.000196687
0.128482	1.82064e-05		0.128482	1.36784e-05		0.128482	0.000588934		0.128482	9.44408e-05		0.128482	0.000126518		0.128482	0.000188552
0.131376	1.84342e-05		0.131376	1.38432e-05		0.131376	0.000518984		0.131376	8.91599e-05		0.131376	0.000123391		0.131376	0.000182116
0.13427	1.86127e-05		0.13427	1.40441e-05		0.13427	0.000445621		0.13427	8.49335e-05		0.13427	0.000120962		0.13427	0.000177031
0.137164	1.87496e-05		0.137164	1.42857e-05		0.137164	0.000377754		0.137164	8.15802e-05		0.137164	0.000119072		0.137164	0.000173033
0.140058	1.88479e-05		0.140058	1.45737e-05		0.140058	0.000318995		0.140058	7.89512e-05		0.140058	0.000117598		0.140058	0.000169876
0.142952	1.89077e-05		0.142952	1.4902e-05		0.142952	0.000270019		0.142952	7.69174e-05		0.142952	0.000116437		0.142952	0.000167355
0.145846	1.89339e-05		0.145846	1.52629e-05		0.145846	0.000229484		0.145846	7.53619e-05		0.145846	0.000115511		0.145846	0.000165309
0.14874	1.89314e-05		0.14874	1.56597e-05		0.14874	0.000196039		0.14874	7.41852e-05		0.14874	0.000114759		0.14874	0.000163617
0.151633	1.89075e-05		0.151633	1.60947e-05		0.151633	0.000168528		0.151633	7.32986e-05		0.151633	0.000114135		0.151633	0.000162183
0.154527	1.88676e-05		0.154527	1.65549e-05		0.154527	0.000145867		0.154527	7.26306e-05		0.154527	0.000113603		0.154527	0.000160936
0.157421	1.88171e-05		0.157421	1.70302e-05		0.157421	0.000127155		0.157421	7.21297e-05		0.157421	0.000113138		0.157421	0.000159821
0.160315	1.8761e-05		0.160315	1.75219e-05		0.160315	0.000111749		0.160315	7.17552e-05		0.160315	0.00011272		0.160315	0.000158796
0.163209	1.87038e-05		0.163209	1.80239e-05		0.163209	9.91739e-05		0.163209	7.14748e-05		0.163209	0.000112335		0.163209	0.000157832
0.166103	1.86508e-05		0.166103	1.85325e-05		0.166103	8.89417e-05		0.166103	7.12635e-05		0.166103	0.000111972		0.166103	0.000156907
0.166103	1.86508e-05		0.166103	1.85325e-05		0.166103	8.89417e-05		0.166103	7.12635e-05		0.166103	0.000111972		0.166103	0.000156907
0.168997	1.86054e-05		0.168997	1.9052e-05		0.168997	8.05819e-05		0.168997	7.10953e-05		0.168997	0.000111625		0.168997	0.000156033
0.171891	1.85707e-05		0.171891	1.95741e-05		0.171891	7.37484e-05		0.171891	7.09507e-05		0.171891	0.000111288		0.171891	0.000155222
0.174785	1.85507e-05		0.174785	2.00911e-05		0.174785	6.81976e-05		0.174785	7.08225e-05		0.174785	0.000110958		0.174785	0.000154472
0.177678	1.85483e-05		0.177678	2.06101e-05		0.177678	6.37105e-05		0.177678	7.07052e-05		0.177678	0.000110631		0.177678	0.000153787
0.180572	1.85655e-05		0.180572	2.11366e-05		0.180572	6.00956e-05		0.180572	7.05952e-05		0.180572	0.000110307		0.180572	0.000153153
0.183466	1.86083e-05		0.183466	2.16586e-05		0.183466	5.71995e-05		0.183466	7.04904e-05		0.183466	0.000109982		0.183466	0.000152563
0.18636	1.86834e-05		0.18636	2.21629e-05		0.18636	5.48883e-05		0.18636	7.03898e-05		0.18636	0.000109657		0.18636	0.000152011
0.189254	1.87873e-05		0.189254	2.26507e-05		0.189254	5.3049e-05		0.189254	7.02934e-05		0.189254	0.00010933		0.189254	0.000151491
0.192148	1.89172e-05		0.192148	2.31202e-05		0.192148	5.15854e-05		0.192148	7.02017e-05		0.192148	0.000109002		0.192148	0.000151002
0.195042	1.90748e-05		0.195042	2.35729e-05		0.195042	5.04304e-05		0.195042	7.0115e-05		0.195042	0.000108671		0.195042	0.00015054
0.197936	1.92559e-05		0.197936	2.4003e-05		0.197936	4.95269e-05		0.197936	7.00211e-05		0.197936	0.000108336		0.197936	0.000150104
0.20083	1.94599e-05		0.20083	2.44065e-05		0.20083	4.88275e-05		0.20083	6.99105e-05		0.20083	0.000107997		0.20083	0.000149693
0.203723	1.96931e-05		0.203723	2.47898e-05		0.203723	4.82922e-05		0.203723	6.97868e-05		0.203723	0.00010766		0.203723	0.000149304
0.206617	1.99536e-05		0.206617	2.51596e-05		0.206617	4.78771e-05		0.206617	6.96516e-05		0.206617	0.000107332		0.206617	0.000148939
0.209511	2.02383e-05		0.209511	2.55229e-05		0.209511	4.75461e-05		0.209511	6.95056e-05		0.209511	0.000107011		0.209511	0.000148598
0.212405	2.05507e-05		0.212405	2.58858e-05		0.212405	4.72799e-05		0.212405	6.93491e-05		0.212405	0.000106698		0.212405	0.000148284
0.215299	2.08911e-05		0.215299	2.62538e-05		0.215299	4.70634e-05		0.215299	6.9182e-05		0.215299	0.000106394		0.215299	0.000148004
0.215299	2.08911e-05		0.215299	2.62538e-05		0.215299	4.70634e-05		0.215299	6.9182e-05		0.215299	0.000106394		0.215299	0.000148004
0.218193	2.12612e-05		0.218193	2.66368e-05		0.218193	4.68817e-05		0.218193	6.90057e-05		0.218193	0.000106095		0.218193	0.000147732
0.221087	2.16624e-05		0.221087	2.70465e-05		0.221087	4.67213e-05		0.221087	6.88223e-05		0.221087	0.000105788		0.221087	0.00014743
0.223981	2.20955e-05		0.223981	2.74851e-05		0.223981	4.65736e-05		0.223981	6.86326e-05		0.223981	0.000105472		0.223981	0.000147078
0.226875	2.25677e-05		0.226875	2.79627e-05		0.226875	4.64333e-05		0.226875	6.84368e-05		0.226875	0.000105143		0.226875	0.000146669
0.229768	2.30766e-05		0.229768	2.84847e-05		0.229768	4.62971e-05		0.229768	6.82351e-05		0.229768	0.000104804		0.229768	0.000146202
0.232662	2.36127e-05		0.232662	2.90495e-05		0.232662	4.61628e-05		0.232662	6.80274e-05		0.232662	0.000104455		0.232662	0.000145697
0.235556	2.41764e-05		0.235556	2.96654e-05		0.235556	4.60289e-05		0.235556	6.78137e-05		0.235556	0.000104097		0.235556	0.000145173
0.23845	2.47759e-05		0.23845	3.0337e-05		0.23845	4.58946e-05		0.23845	6.75943e-05		0.23845	0.000103731		0.23845	0.000144632
0.241344	2.5406e-05		0.241344	3.10699e-05		0.241344	4.57588e-05		0.241344	6.73694e-05		0.241344	0.000103356		0.241344	0.000144076
0.244238	2.6062e-05		0.244238	3.18689e-05		0.244238	4.56207e-05		0.244238	6.71393e-05		0.244238	0.000102974		0.244238	0.000143508
0.247132	2.67454e-05		0.247132	3.27381e-05		0.247132	4.54818e-05		0.247132	6.69046e-05		0.247132	0.000102585		0.247132	0.000142931
0.250026	2.74517e-05		0.250026	3.36829e-05		0.250026	4.53442e-05		0.250026	6.66656e-05		0.250026	0.000102191		0.250026	0.000142347
0.25292	2.81835e-05		0.25292	3.47062e-05		0.25292	4.52086e-05		0.25292	6.64228e-05		0.25292	0.000101792		0.25292	0.000141758
0.255814	2.89421e-05		0.255814	3.58135e-05		0.255814	4.50745e-05		0.255814	6.61768e-05		0.255814	0.000101388		0.255814	0.000141166
0.258707	2.97279e-05		0.258707	3.70184e-05		0.258707	4.49416e-05		0.258707	6.59279e-05		0.258707	0.00010098		0.258707	0.000140574
0.261601	3.054e-05		0.261601	3.83333e-05		0.261601	4.48099e-05		0.261601	6.56769e-05		0.261601	0.000100567		0.261601	0.000139984
0.264495	3.13815e-05		0.264495	3.97696e-05		0.264495	4.46791e-05		0.264495	6.54242e-05		0.264495	0.000100149		0.264495	0.000139396
0.267389	3.22524e-05		0.267389	4.13389e-05		0.267389	4.45491e-05		0.267389	6.51704e-05		0.267389	9.9727e-05		0.267389	0.000138814
0.270283	3.31493e-05		0.270283	4.30502e-05		0.270283	4.44201e-05		0.270283	6.49162e-05		0.270283	9.93033e-05		0.270283	0.000138238
0.273177	3.4075e-05		0.273177	4.49173e-05		0.273177	4.42918e-05		0.273177	6.46624e-05		0.273177	9.88809e-05		0.273177	0.000137669
0.276071	3.50356e-05		0.276071	4.69542e-05		0.276071	4.41645e-05		0.276071	6.44099e-05		0.276071	9.84594e-05		0.276071	0.000137105
0.278965	3.6037e-05		0.278965	4.91666e-05		0.278965	4.4038e-05		0.278965	6.41594e-05		0.278965	9.80387e-05		0.278965	0.000136544
0.281859	3.70859e-05		0.281859	5.15522e-05		0.281859	4.39123e-05		0.281859	6.39052e-05		0.281859	9.76188e-05		0.281859	0.000135981
0.284752	3.81897e-05		0.284752	5.41058e-05		0.284752	4.37876e-05		0.284752	6.36418e-05		0.284752	9.71999e-05		0.284752	0.000135412
0.287646	3.93569e-05		0.287646	5.68337e-05		0.287646	4.36638e-05		0.287646	6.33705e-05		0.287646	9.67818e-05		0.287646	0.000134836
0.29054	4.06013e-05		0.29054	5.97402e-05		0.29054	4.35409e-05		0.29054	6.30917e-05		0.29054	9.63647e-05		0.29054	0.000134251
0.293434	4.19343e-05		0.293434	6.28245e-05		0.293434	4.3419e-05		0.293434	6.28056e-05		0.293434	9.59484e-05		0.293434	0.000133655
0.296328	4.3363e-05		0.296328	6.60934e-05		0.296328	4.3298e-05		0.296328	6.25127e-05		0.296328	9.55331e-05		0.296328	0.000133047
0.299222	4.48997e-05		0.299222	6.95547e-05		0.299222	4.31781e-05		0.299222	6.2213e-05		0.299222	9.51186e-05		0.299222	0.000132427
0.302116	4.65588e-05		0.302116	7.32148e-05		0.302116	4.30592e-05		0.302116	6.1907e-05		0.302116	9.47049e-05		0.302116	0.000131794
0.30501	4.83561e-05		0.30501	7.70786e-05		0.30501	4.29414e-05		0.30501	6.15951e-05		0.30501	9.42919e-05		0.30501	0.00013115
0.307904	5.0308e-05		0.307904	8.11508e-05		0.307904	4.28246e-05		0.307904	6.12775e-05		0.307904	9.38795e-05		0.307904	0.000130495
0.310797	5.24315e-05		0.310797	8.54352e-05		0.310797	4.27089e-05		0.310797	6.09546e-05		0.310797	9.34674e-05		0.310797	0.000129832
0.313691	5.47475e-05		0.313691	8.99342e-05		0.313691	4.2594e-05		0.313691	6.06269e-05		0.313691	9.30557e-05		0.313691	0.000129164
0.313691	5.47475e-05		0.313691	8.99342e-05		0.313691	4.2594e-05		0.313691	6.06269e-05		0.313691	9.30557e-05		0.313691	0.000129164
0.316585	5.72783e-05		0.316585	9.46613e-05		0.316585	4.24749e-05		0.316585	6.03095e-05		0.316585	9.26383e-05		0.316585	0.000128475
0.319479	6.0042e-05		0.319479	9.96247e-05		0.319479	4.23479e-05		0.319479	6.00151e-05		0.319479	9.221e-05		0.319479	0.000127749
0.322373	6.30556e-05		0.322373	0.000104837		0.322373	4.22146e-05		0.322373	5.97405e-05		0.322373	9.17715e-05		0.322373	0.000126998
0.325267	6.63315e-05		0.325267	0.000110306		0.325267	4.20763e-05		0.325267	5.94833e-05		0.325267	9.13269e-05		0.325267	0.000126233
0.328161	6.98888e-05		0.328161	0.000116028		0.328161	4.1934e-05		0.328161	5.92418e-05		0.328161	9.08795e-05		0.328161	0.000125457
0.331055	7.37497e-05		0.331055	0.000122021		0.331055	4.17885e-05		0.331055	5.90149e-05		0.331055	9.043e-05		0.331055	0.00012467
0.333949	7.79258e-05		0.333949	0.000128324		0.333949	4.16403e-05		0.333949	5.88017e-05		0.333949	8.99788e-05		0.333949	0.000123874
0.336842	8.24281e-05		0.336842	0.000134983		0.336842	4.14897e-05		0.336842	5.86019e-05		0.336842	8.95261e-05		0.336842	0.000123071
0.339736	8.72704e-05		0.339736	0.000142041		0.339736	4.13369e-05		0.339736	5.84152e-05		0.339736	8.90725e-05		0.339736	0.000122263
0.34263	9.24734e-05		0.34263	0.000149546		0.34263	4.11835e-05		0.34263	5.82422e-05		0.34263	8.8618e-05		0.34263	0.000121448
0.345524	9.80595e-05		0.345524	0.000157561		0.345524	4.10309e-05		0.345524	5.80833e-05		0.345524	8.81628e-05		0.345524	0.00012063
0.348418	0.000104037		0.348418	0.000166132		0.348418	4.0879e-05		0.348418	5.79397e-05		0.348418	8.7707e-05		0.348418	0.000119807
0.351312	0.000110414		0.351312	0.000175271		0.351312	4.0728e-05		0.351312	5.78001e-05		0.351312	8.72506e-05		0.351312	0.000118982
0.354206	0.000117211		0.354206	0.000184987		0.354206	4.05778e-05		0.354206	5.7654e-05		0.354206	8.67936e-05		0.354206	0.000118154
0.3571	0.000124445		0.3571	0.000195308		0.3571	4.04286e-05		0.3571	5.75027e-05		0.3571	8.6336e-05		0.3571	0.000117324
0.359994	0.00013214		0.359994	0.000206269		0.359994	4.02804e-05		0.359994	5.73468e-05		0.359994	8.58776e-05		0.359994	0.0001165
0.362887	0.000140331		0.362887	0.000217913		0.362887	4.01333e-05		0.362887	5.71866e-05		0.362887	8.54181e-05		0.362887	0.000115693
0.365781	0.000149066		0.365781	0.000230305		0.365781	3.99874e-05		0.365781	5.70222e-05		0.365781	8.49574e-05		0.365781	0.000114904
0.368675	0.000158397		0.368675	0.000243522		0.368675	3.98428e-05		0.368675	5.68534e-05		0.368675	8.44951e-05		0.368675	0.000114135
0.371569	0.000168381		0.371569	0.000257627		0.371569	3.96995e-05		0.371569	5.66805e-05		0.371569	8.4031e-05		0.371569	0.000113387
0.374463	0.000179078		0.374463	0.000272723		0.374463	3.95578e-05		0.374463	5.65034e-05		0.374463	8.35688e-05		0.374463	0.000112661
0.377357	0.000190556		0.377357	0.000288972		0.377357	3.94178e-05		0.377357	5.63223e-05		0.377357	8.31124e-05		0.377357	0.000111959
0.380251	0.000202888		0.380251	0.000306515		0.380251	3.92796e-05		0.380251	5.6137e-05		0.380251	8.26617e-05		0.380251	0.000111283
0.383145	0.000216137		0.383145	0.000325415		0.383145	3.91427e-05		0.383145	5.59477e-05		0.383145	8.22168e-05		0.383145	0.000110633
0.386039	0.000230356		0.386039	0.000345721		0.386039	3.90064e-05		0.386039	5.57542e-05		0.386039	8.17778e-05		0.386039	0.000110011
0.388932	0.000245585		0.388932	0.000367571		0.388932	3.88708e-05		0.388932	5.55565e-05		0.388932	8.13448e-05		0.388932	0.000109416
0.391826	0.000261875		0.391826	0.000391192		0.391826	3.8736e-05		0.391826	5.53545e-05		0.391826	8.09179e-05		0.391826	0.00010885
0.39472	0.000279259		0.39472	0.000416988		0.39472	3.86017e-05		0.39472	5.51477e-05		0.39472	8.04971e-05		0.39472	0.000108315
0.397614	0.000297755		0.397614	0.000445473		0.397614	3.84679e-05		0.397614	5.49359e-05		0.397614	8.00827e-05		0.397614	0.000107798
0.400508	0.000317439		0.400508	0.000477216		0.400508	3.83343e-05		0.400508	5.47184e-05		0.400508	7.9675e-05		0.400508	0.000107284
0.403402	0.000338492		0.403402	0.000512841		0.403402	3.82006e-05		0.403402	5.44946e-05		0.403402	7.92742e-05		0.403402	0.000106773
0.403402	0.000338492		0.403402	0.000512841		0.403402	3.82006e-05		0.403402	5.44946e-05		0.403402	7.92742e-05		0.403402	0.000106773
0.406296	0.000361153		0.406296	0.000552957		0.406296	3.80666e-05		0.406296	5.42671e-05		0.406296	7.88757e-05		0.406296	0.000106256
0.40919	0.000385594		0.40919	0.000599277		0.40919	3.79324e-05		0.40919	5.40385e-05		0.40919	7.84744e-05		0.40919	0.000105725
0.412084	0.000411937		0.412084	0.000654123		0.412084	3.77976e-05		0.412084	5.38084e-05		0.412084	7.80705e-05		0.412084	0.000105176
0.414977	0.000440373		0.414977	0.000720562		0.414977	3.7662e-05		0.414977	5.35761e-05		0.414977	7.76642e-05		0.414977	0.000104611
0.417871	0.000471118		0.417871	0.000802819		0.417871	3.75258e-05		0.417871	5.33417e-05		0.417871	7.72554e-05		0.417871	0.000104027
0.420765	0.000504557		0.420765	0.000902634		0.420765	3.7389e-05		0.420765	5.31051e-05		0.420765	7.68438e-05		0.420765	0.000103426
0.423659	0.000541824		0.423659	0.00100968		0.423659	3.72514e-05		0.423659	5.28663e-05		0.423659	7.64291e-05		0.423659	0.000102809
0.426553	0.000584019		0.426553	0.00111526		0.426553	3.71129e-05		0.426553	5.26255e-05		0.426553	7.60118e-05		0.426553	0.000102177
0.429447	0.000632567		0.429447	0.00121466		0.429447	3.69736e-05		0.429447	5.23828e-05		0.429447	7.55924e-05		0.429447	0.00010153
0.432341	0.000690601		0.432341	0.00130236		0.432341	3.68337e-05		0.432341	5.21383e-05		0.432341	7.51713e-05		0.432341	0.000100871
0.435235	0.000763048		0.435235	0.00137806		0.435235	3.6693e-05		0.435235	5.18924e-05		0.435235	7.47492e-05		0.435235	0.000100199
0.438129	0.00085122		0.438129	0.00144069		0.438129	3.65518e-05		0.438129	5.16452e-05		0.438129	7.43268e-05		0.438129	9.95185e-05
0.441023	0.000947535		0.441023	0.00149065		0.441023	3.64101e-05		0.441023	5.1397e-05		0.441023	7.39045e-05		0.441023	9.88294e-05
0.443916	0.0010422		0.443916	0.0015277		0.443916	3.62678e-05		0.443916	5.11479e-05		0.443916	7.34829e-05		0.443916	9.81339e-05
0.44681	0.00112951		0.44681	0.00155257		0.44681	3.6125e-05		0.44681	5.08981e-05		0.44681	7.30627e-05		0.44681	9.74338e-05
0.449704	0.00120634		0.449704	0.00156777		0.449704	3.59818e-05		0.449704	5.06477e-05		0.449704	7.26443e-05		0.449704	9.67306e-05
0.452598	0.0012708		0.452598	0.00157204		0.452598	3.58382e-05		0.452598	5.03968e-05		0.452598	7.22284e-05		0.452598	9.60259e-05
0.455492	0.00132215		0.455492	0.00156651		0.455492	3.56942e-05		0.455492	5.01456e-05		0.455492	7.18155e-05		0.455492	9.53211e-05
0.458386	0.00135985		0.458386	0.0015545		0.458386	3.55498e-05		0.458386	4.98942e-05		0.458386	7.14063e-05		0.458386	9.46176e-05
0.46128	0.00138543		0.46128	0.00153616		0.46128	3.54052e-05		0.46128	4.96426e-05		0.46128	7.10015e-05		0.46128	9.39166e-05
0.464174	0.00139929		0.464174	0.00151109		0.464174	3.52602e-05		0.464174	4.93908e-05		0.464174	7.05993e-05		0.464174	9.32191e-05
0.467068	0.0014017		0.467068	0.0014803		0.467068	3.51151e-05		0.467068	4.9139e-05		0.467068	7.01975e-05		0.467068	9.25262e-05
0.469961	0.00139632		0.469961	0.00144496		0.469961	3.49697e-05		0.469961	4.88874e-05		0.469961	6.97962e-05		0.469961	9.18375e-05
0.472855	0.00138397		0.472855	0.00140564		0.472855	3.48242e-05		0.472855	4.86365e-05		0.472855	6.93954e-05		0.472855	9.11525e-05
0.475749	0.0013647		0.475749	0.00136386		0.475749	3.46785e-05		0.475749	4.83866e-05		0.475749	6.89952e-05		0.475749	9.04718e-05
0.478643	0.00133916		0.478643	0.00132055		0.478643	3.45328e-05		0.478643	4.81377e-05		0.478643	6.85957e-05		0.478643	8.97956e-05
0.481537	0.0013083		0.481537	0.00127618		0.481537	3.4387e-05		0.481537	4.78899e-05		0.481537	6.8197e-05		0.481537	8.91243e-05
0.484431	0.0012749		0.484431	0.00123037		0.484431	3.42411e-05		0.484431	4.76435e-05		0.484431	6.77992e-05		0.484431	8.84578e-05
0.487325	0.00123851		0.487325	0.00118334		0.487325	3.40952e-05		0.487325	4.73984e-05		0.487325	6.74023e-05		0.487325	8.77961e-05
0.490219	0.00119825		0.490219	0.00113621		0.490219	3.39494e-05		0.490219	4.71549e-05		0.490219	6.70065e-05		0.490219	8.71392e-05
0.493113	0.00115619		0.493113	0.00108946		0.493113	3.38036e-05		0.493113	4.6913e-05		0.493113	6.66119e-05		0.493113	8.64867e-05
0.496006	0.00111282		0.496006	0.0010433		0.496006	3.36581e-05		0.496006	4.66729e-05		0.496006	6.62185e-05		0.496006	8.58381e-05
0.4989	0.00106851		0.4989	0.000997739		0.4989	3.3513e-05		0.4989	4.64347e-05		0.4989	6.58264e-05		0.4989	8.51931e-05
0.501794	0.00102398		0.501794	0.000952901		0.501794	3.33688e-05		0.501794	4.61984e-05		0.501794	6.54357e-05		0.501794	8.45509e-05
0.504688	0.000979292		0.504688	0.000909056		0.504688	3.32254e-05		0.504688	4.59644e-05		0.504688	6.50465e-05		0.504688	8.39177e-05
0.507582	0.000935046		0.507582	0.000866309		0.507582	3.30831e-05		0.507582	4.57326e-05		0.507582	6.46588e-05		0.507582	8.32998e-05
0.510476	0.000891593		0.510476	0.000824842		0.510476	3.29419e-05		0.510476	4.55034e-05		0.510476	6.42729e-05		0.510476	8.26979e-05
0.51337	0.000849104		0.51337	0.00078472		0.51337	3.28019e-05		0.51337	4.52769e-05		0.51337	6.3889e-05		0.51337	8.21127e-05
0.516264	0.000807928		0.516264	0.000746054		0.516264	3.26634e-05		0.516264	4.50533e-05		0.516264	6.35072e-05		0.516264	8.15453e-05
0.519158	0.000767983		0.519158	0.00070903		0.519158	3.25266e-05		0.519158	4.48328e-05		0.519158	6.31277e-05		0.519158	8.09974e-05
0.522051	0.000729149		0.522051	0.000673618		0.522051	3.23918e-05		0.522051	4.46158e-05		0.522051	6.27503e-05		0.522051	8.04712e-05
0.524945	0.000691722		0.524945	0.00063982		0.524945	3.22593e-05		0.524945	4.44026e-05		0.524945	6.23753e-05		0.524945	7.99697e-05
0.524945	0.000691722		0.524945	0.00063982		0.524945	3.22593e-05		0.524945	4.44026e-05		0.524945	6.23753e-05		0.524945	7.99697e-05
0.527839	0.000655754		0.527839	0.000607665		0.527839	3.21284e-05		0.527839	4.4191e-05		0.527839	6.20029e-05		0.527839	7.94831e-05
0.530733	0.000621111		0.530733	0.00057703		0.530733	3.1998e-05		0.530733	4.3979e-05		0.530733	6.16334e-05		0.530733	7.89989e-05
0.533627	0.000587935		0.533627	0.000547903		0.533627	3.1868e-05		0.533627	4.37664e-05		0.533627	6.12671e-05		0.533627	7.85164e-05
0.536521	0.000556491		0.536521	0.000520236		0.536521	3.17385e-05		0.536521	4.35534e-05		0.536521	6.0904e-05		0.536521	7.80342e-05
0.539415	0.000526901		0.539415	0.000493985		0.539415	3.16094e-05		0.539415	4.334e-05		0.539415	6.05443e-05		0.539415	7.7551e-05
0.542309	0.000498888		0.542309	0.00046912		0.542309	3.14805e-05		0.542309	4.31262e-05		0.542309	6.01883e-05		0.542309	7.7068e-05
0.545203	0.000472221		0.545203	0.000445604		0.545203	3.1352e-05		0.545203	4.2912e-05		0.545203	5.9836e-05		0.545203	7.65864e-05
0.548096	0.000446896		0.548096	0.000423401		0.548096	3.12238e-05		0.548096	4.26975e-05		0.548096	5.94876e-05		0.548096	7.61059e-05
0.55099	0.000422865		0.55099	0.000402306		0.55099	3.10958e-05		0.55099	4.24827e-05		0.55099	5.91434e-05		0.55099	7.5626e-05
0.553884	0.000400091		0.553884	0.000382252		0.553884	3.09681e-05		0.553884	4.22677e-05		0.553884	5.88023e-05		0.553884	7.51463e-05
0.556778	0.000378492		0.556778	0.000363337		0.556778	3.08407e-05		0.556778	4.20525e-05		0.556778	5.84633e-05		0.556778	7.46665e-05
0.559672	0.000358021		0.559672	0.000345531		0.559672	3.07137e-05		0.559672	4.18371e-05		0.559672	5.81262e-05		0.559672	7.41865e-05
0.562566	0.000338533		0.562566	0.000328762		0.562566	3.0587e-05		0.562566	4.16216e-05		0.562566	5.77911e-05		0.562566	7.37062e-05
0.56546	0.000320033		0.56546	0.000312909		0.56546	3.04608e-05		0.56546	4.14059e-05		0.56546	5.74581e-05		0.56546	7.32254e-05
0.568354	0.00030266		0.568354	0.000297871		0.568354	3.03346e-05		0.568354	4.11902e-05		0.568354	5.7127e-05		0.568354	7.27441e-05
0.571248	0.000286399		0.571248	0.000283648		0.571248	3.02076e-05		0.571248	4.09744e-05		0.571248	5.67979e-05		0.571248	7.22622e-05
0.574142	0.000271239		0.574142	0.000270244		0.574142	3.00799e-05		0.574142	4.07584e-05		0.574142	5.64708e-05		0.574142	7.17794e-05
0.577035	0.000257021		0.577035	0.000257686		0.577035	2.99515e-05		0.577035	4.05423e-05		0.577035	5.61456e-05		0.577035	7.12956e-05
0.579929	0.00024354		0.579929	0.000245744		0.579929	2.98222e-05		0.579929	4.0326e-05		0.579929	5.58225e-05		0.579929	7.0813e-05
0.582823	0.000230828		0.582823	0.000234256		0.582823	2.96921e-05		0.582823	4.01103e-05		0.582823	5.55015e-05		0.582823	7.03339e-05
0.585717	0.000218951		0.585717	0.000223335		0.585717	2.95612e-05		0.585717	3.98957e-05		0.585717	5.51826e-05		0.585717	6.98586e-05
0.588611	0.000207946		0.588611	0.000213049		0.588611	2.94294e-05		0.588611	3.96825e-05		0.588611	5.48658e-05		0.588611	6.93872e-05
0.591505	0.000197559		0.591505	0.000203412		0.591505	2.92969e-05		0.591505	3.94707e-05		0.591505	5.45512e-05		0.591505	6.892e-05
0.594399	0.000187527		0.594399	0.000194393		0.594399	2.91636e-05		0.594399	3.92605e-05		0.594399	5.42389e-05		0.594399	6.8457e-05
0.597293	0.000177906		0.597293	0.000185926		0.597293	2.90297e-05		0.597293	3.90519e-05		0.597293	5.39289e-05		0.597293	6.79983e-05
0.600186	0.000168799		0.600186	0.000177738		0.600186	2.88951e-05		0.600186	3.8845e-05		0.600186	5.36211e-05		0.600186	6.75439e-05
0.60308	0.000160312		0.60308	0.00016976		0.60308	2.87601e-05		0.60308	3.86399e-05		0.60308	5.3315e-05		0.60308	6.70938e-05
0.605974	0.000152492		0.605974	0.000162152		0.605974	2.86248e-05		0.605974	3.84367e-05		0.605974	5.30106e-05		0.605974	6.66479e-05
0.608868	0.00014527		0.608868	0.000154971		0.608868	2.84892e-05		0.608868	3.82356e-05		0.608868	5.27081e-05		0.608868	6.62059e-05
0.611762	0.000138296		0.611762	0.000148244		0.611762	2.83537e-05		0.611762	3.80365e-05		0.611762	5.24074e-05		0.611762	6.57676e-05
0.614656	0.000131415		0.614656	0.000141949		0.614656	2.82183e-05		0.614656	3.78396e-05		0.614656	5.21085e-05		0.614656	6.53327e-05
0.61755	0.000124739		0.61755	0.000136079		0.61755	2.80833e-05		0.61755	3.7645e-05		0.61755	5.18115e-05		0.61755	6.49006e-05
0.620444	0.000118377		0.620444	0.00013065		0.620444	2.79489e-05		0.620444	3.74528e-05		0.620444	5.15165e-05		0.620444	6.44746e-05
0.623338	0.000112444		0.623338	0.000125616		0.623338	2.78153e-05		0.623338	3.72631e-05		0.623338	5.12234e-05		0.623338	6.40584e-05
0.626231	0.000106936		0.626231	0.000120767		0.626231	2.76828e-05		0.626231	3.70761e-05		0.626231	5.09324e-05		0.626231	6.36523e-05
0.629125	0.000101844		0.629125	0.000115968		0.629125	2.75516e-05		0.629125	3.68918e-05		0.629125	5.06434e-05		0.629125	6.32568e-05
0.632019	9.71733e-05		0.632019	0.000111272		0.632019	2.7422e-05		0.632019	3.67106e-05		0.632019	5.03566e-05		0.632019	6.28722e-05
0.634913	9.29526e-05		0.634913	0.000106775		0.634913	2.72942e-05		0.634913	3.65325e-05		0.634913	5.0072e-05		0.634913	6.24992e-05
0.637807	8.90436e-05		0.637807	0.000102552		0.637807	2.71688e-05		0.637807	3.63581e-05		0.637807	4.97898e-05		0.637807	6.21386e-05
0.640701	8.53224e-05		0.640701	9.86486e-05		0.640701	2.70469e-05		0.640701	3.61861e-05		0.640701	4.95102e-05		0.640701	6.17921e-05
0.643595	8.19293e-05		0.643595	9.51548e-05		0.643595	2.69304e-05		0.643595	3.60153e-05		0.643595	4.92335e-05		0.643595	6.1463e-05
0.643595	8.19293e-05		0.643595	9.51548e-05		0.643595	2.69304e-05		0.643595	3.60153e-05		0.643595	4.92335e-05		0.643595	6.1463e-05
0.646489	7.88689e-05		0.646489	9.20294e-05		0.646489	2.68177e-05		0.646489	3.58453e-05		0.646489	4.89591e-05		0.646489	6.11459e-05
0.649383	7.60549e-05		0.649383	8.91524e-05		0.649383	2.67069e-05		0.649383	3.56761e-05		0.649383	4.86865e-05		0.649383	6.08327e-05
0.652277	7.3483e-05		0.652277	8.64888e-05		0.652277	2.65975e-05		0.652277	3.55074e-05		0.652277	4.84159e-05		0.652277	6.05219e-05
0.65517	7.1123e-05		0.65517	8.40152e-05		0.65517	2.64895e-05		0.65517	3.53393e-05		0.65517	4.81473e-05		0.65517	6.02112e-05
0.658064	6.89379e-05		0.658064	8.17048e-05		0.658064	2.63824e-05		0.658064	3.51717e-05		0.658064	4.78805e-05		0.658064	5.98985e-05
0.660958	6.68973e-05		0.660958	7.95274e-05		0.660958	2.62761e-05		0.660958	3.50045e-05		0.660958	4.76155e-05		0.660958	5.95816e-05
0.663852	6.49737e-05		0.663852	7.74528e-05		0.663852	2.61704e-05		0.663852	3.48378e-05		0.663852	4.73522e-05		0.663852	5.92628e-05
0.666746	6.31454e-05		0.666746	7.54631e-05		0.666746	2.60651e-05		0.666746	3.46715e-05		0.666746	4.70907e-05		0.666746	5.8945e-05
0.66964	6.14005e-05		0.66964	7.35476e-05		0.66964	2.59602e-05		0.66964	3.45055e-05		0.66964	4.6831e-05		0.66964	5.8628e-05
0.672534	5.97319e-05		0.672534	7.16974e-05		0.672534	2.58557e-05		0.672534	3.43399e-05		0.672534	4.65732e-05		0.672534	5.83116e-05
0.675428	5.81329e-05		0.675428	6.99097e-05		0.675428	2.57514e-05		0.675428	3.41745e-05		0.675428	4.63171e-05		0.675428	5.79954e-05
0.678322	5.65967e-05		0.678322	6.81832e-05		0.678322	2.56473e-05		0.678322	3.40093e-05		0.678322	4.6063e-05		0.678322	5.76793e-05
0.681215	5.51166e-05		0.681215	6.65194e-05		0.681215	2.55433e-05		0.681215	3.38443e-05		0.681215	4.58107e-05		0.681215	5.73629e-05
0.684109	5.36767e-05		0.684109	6.49212e-05		0.684109	2.54394e-05		0.684109	3.36793e-05		0.684109	4.55604e-05		0.684109	5.70461e-05
0.687003	5.22677e-05		0.687003	6.33899e-05		0.687003	2.53353e-05		0.687003	3.35143e-05		0.687003	4.53122e-05		0.687003	5.67285e-05
0.689897	5.08926e-05		0.689897	6.19286e-05		0.689897	2.5231e-05		0.689897	3.33492e-05		0.689897	4.50661e-05		0.689897	5.64099e-05
0.692791	4.95509e-05		0.692791	6.0529e-05		0.692791	2.51263e-05		0.692791	3.31838e-05		0.692791	4.48222e-05		0.692791	5.60899e-05
0.695685	4.82423e-05		0.695685	5.91816e-05		0.695685	2.5021e-05		0.695685	3.30181e-05		0.695685	4.45806e-05		0.695685	5.57681e-05
0.698579	4.69728e-05		0.698579	5.78886e-05		0.698579	2.49149e-05		0.698579	3.2852e-05		0.698579	4.43417e-05		0.698579	5.54442e-05
0.701473	4.57498e-05		0.701473	5.66542e-05		0.701473	2.48078e-05		0.701473	3.26854e-05		0.701473	4.41043e-05		0.701473	5.51177e-05
0.704367	4.45762e-05		0.704367	5.54841e-05		0.704367	2.46993e-05		0.704367	3.25195e-05		0.704367	4.38674e-05		0.704367	5.4788e-05
0.70726	4.34564e-05		0.70726	5.43766e-05		0.70726	2.45892e-05		0.70726	3.23553e-05		0.70726	4.36307e-05		0.70726	5.44547e-05
0.710154	4.2398e-05		0.710154	5.33309e-05		0.710154	2.4477e-05		0.710154	3.2193e-05		0.710154	4.33942e-05		0.710154	5.41213e-05
0.713048	4.14187e-05		0.713048	5.23569e-05		0.713048	2.43644e-05		0.713048	3.20331e-05		0.713048	4.31579e-05		0.713048	5.37923e-05
0.715942	4.05439e-05		0.715942	5.14699e-05		0.715942	2.42535e-05		0.715942	3.18759e-05		0.715942	4.29215e-05		0.715942	5.34698e-05
0.715942	4.05439e-05		0.715942	5.14699e-05		0.715942	2.42535e-05		0.715942	3.18759e-05		0.715942	4.29215e-05		0.715942	5.34698e-05
0.718836	3.97453e-05		0.718836	5.06424e-05		0.718836	2.41444e-05		0.718836	3.17205e-05		0.718836	4.2685e-05		0.718836	5.31502e-05
0.72173	3.89812e-05		0.72173	4.98352e-05		0.72173	2.40367e-05		0.72173	3.15653e-05		0.72173	4.24481e-05		0.72173	5.28289e-05
0.724624	3.82486e-05		0.724624	4.90462e-05		0.724624	2.39305e-05		0.724624	3.14102e-05		0.724624	4.22107e-05		0.724624	5.25054e-05
0.727518	3.75447e-05		0.727518	4.82748e-05		0.727518	2.38254e-05		0.727518	3.1255e-05		0.727518	4.19726e-05		0.727518	5.21795e-05
0.730412	3.68675e-05		0.730412	4.75194e-05		0.730412	2.37212e-05		0.730412	3.10995e-05		0.730412	4.17336e-05		0.730412	5.18507e-05
0.733305	3.62161e-05		0.733305	4.67779e-05		0.733305	2.36178e-05		0.733305	3.09435e-05		0.733305	4.14935e-05		0.733305	5.15185e-05
0.736199	3.55883e-05		0.736199	4.60487e-05		0.736199	2.35149e-05		0.736199	3.07868e-05		0.736199	4.1252e-05		0.736199	5.11822e-05
0.739093	3.49816e-05		0.739093	4.53298e-05		0.739093	2.34123e-05		0.739093	3.06291e-05		0.739093	4.10089e-05		0.739093	5.0841e-05
0.741987	3.4394e-05		0.741987	4.4622e-05		0.741987	2.33097e-05		0.741987	3.04701e-05		0.741987	4.07637e-05		0.741987	5.04938e-05
0.744881	3.38232e-05		0.744881	4.39261e-05		0.744881	2.32069e-05		0.744881	3.03096e-05		0.744881	4.05162e-05		0.744881	5.01396e-05
0.747775	3.32667e-05		0.747775	4.32413e-05		0.747775	2.31036e-05		0.747775	3.01471e-05		0.747775	4.0266e-05		0.747775	4.97769e-05
0.750669	3.27225e-05		0.750669	4.25637e-05		0.750669	2.29995e-05		0.750669	2.99823e-05		0.750669	4.00125e-05		0.750669	4.94045e-05
0.753563	3.219e-05		0.753563	4.18894e-05		0.753563	2.28942e-05		0.753563	2.98147e-05		0.753563	3.97553e-05		0.753563	4.9021e-05
0.756457	3.16681e-05		0.756457	4.12163e-05		0.756457	2.27872e-05		0.756457	2.9644e-05		0.756457	3.94928e-05		0.756457	4.86298e-05
0.75935	3.11545e-05		0.75935	4.05427e-05		0.75935	2.26784e-05		0.75935	2.94695e-05		0.75935	3.92237e-05		0.75935	4.82346e-05
0.762244	3.06474e-05		0.762244	3.9868e-05		0.762244	2.25671e-05		0.762244	2.9291e-05		0.762244	3.89472e-05		0.762244	4.7834e-05
0.765138	3.01452e-05		0.765138	3.91938e-05		0.765138	2.24529e-05		0.765138	2.91073e-05		0.765138	3.86627e-05		0.765138	4.74265e-05
0.768032	2.96463e-05		0.768032	3.85205e-05		0.768032	2.23355e-05		0.768032	2.89173e-05		0.768032	3.83695e-05		0.768032	4.7011e-05
0.770926	2.91496e-05		0.770926	3.7847e-05		0.770926	2.22143e-05		0.770926	2.87205e-05		0.770926	3.8067e-05		0.770926	4.65865e-05
0.77382	2.86558e-05		0.77382	3.71725e-05		0.77382	2.20889e-05		0.77382	2.85163e-05		0.77382	3.77546e-05		0.77382	4.61526e-05
0.776714	2.81689e-05		0.776714	3.64971e-05		0.776714	2.19591e-05		0.776714	2.83044e-05		0.776714	3.7432e-05		0.776714	4.57089e-05
0.779608	2.76914e-05		0.779608	3.58214e-05		0.779608	2.18244e-05		0.779608	2.80844e-05		0.779608	3.70989e-05		0.779608	4.52555e-05
0.782502	2.72236e-05		0.782502	3.51472e-05		0.782502	2.16848e-05		0.782502	2.78562e-05		0.782502	3.67553e-05		0.782502	4.47927e-05
0.785396	2.67665e-05		0.785396	3.44784e-05		0.785396	2.154e-05		0.785396	2.76197e-05		0.785396	3.64012e-05		0.785396	4.4321e-05
0.788289	2.63216e-05		0.788289	3.38196e-05		0.788289	2.13897e-05		0.788289	2.73751e-05		0.788289	3.60369e-05		0.788289	4.38412e-05
0.791183	2.58907e-05		0.791183	3.31747e-05		0.791183	2.1234e-05		0.791183	2.71224e-05		0.791183	3.56631e-05		0.791183	4.3351e-05
0.794077	2.5476e-05		0.794077	3.25479e-05		0.794077	2.10729e-05		0.794077	2.68619e-05		0.794077	3.5279e-05		0.794077	4.28482e-05
0.796971	2.50836e-05		0.796971	3.19427e-05		0.796971	2.09065e-05		0.796971	2.65936e-05		0.796971	3.4884e-05		0.796971	4.23341e-05
0.799865	2.47185e-05		0.799865	3.13613e-05		0.799865	2.07347e-05		0.799865	2.63177e-05		0.799865	3.44782e-05		0.799865	4.18098e-05
0.799865	2.47185e-05		0.799865	3.13613e-05		0.799865	2.07347e-05		0.799865	2.63177e-05		0.799865	3.44782e-05		0.799865	4.18098e-05
0.802759	2.43645e-05		0.802759	3.07922e-05		0.802759	2.05568e-05		0.802759	2.60327e-05		0.802759	3.40607e-05		0.802759	4.12721e-05
0.805653	2.40058e-05		0.805653	3.02241e-05		0.805653	2.03717e-05		0.805653	2.57372e-05		0.805653	3.36308e-05		0.805653	4.07176e-05
0.808547	2.36438e-05		0.808547	2.96582e-05		0.808547	2.01792e-05		0.808547	2.54324e-05		0.808547	3.31885e-05		0.808547	4.01472e-05
0.811441	2.32795e-05		0.811441	2.90949e-05		0.811441	1.99791e-05		0.811441	2.51197e-05		0.811441	3.27341e-05		0.811441	3.95613e-05
0.814334	2.29136e-05		0.814334	2.8534e-05		0.814334	1.9771e-05		0.814334	2.47992e-05		0.814334	3.22678e-05		0.814334	3.89605e-05
0.817228	2.25454e-05		0.817228	2.79746e-05		0.817228	1.95546e-05		0.817228	2.44711e-05		0.817228	3.17899e-05		0.817228	3.83455e-05
0.820122	2.21738e-05		0.820122	2.74143e-05		0.820122	1.93295e-05		0.820122	2.41355e-05		0.820122	3.13002e-05		0.820122	3.77166e-05
0.823016	2.18006e-05		0.823016	2.68506e-05		0.823016	1.90955e-05		0.823016	2.37927e-05		0.823016	3.07986e-05		0.823016	3.70744e-05
0.82591	2.14272e-05		0.82591	2.62812e-05		0.82591	1.88518e-05		0.82591	2.34432e-05		0.82591	3.02852e-05		0.82591	3.64192e-05
0.828804	2.10522e-05		0.828804	2.57038e-05		0.828804	1.85978e-05		0.828804	2.30876e-05		0.828804	2.97606e-05		0.828804	3.57518e-05
0.831698	2.06738e-05		0.831698	2.51158e-05		0.831698	1.83332e-05		0.831698	2.27269e-05		0.831698	2.92253e-05		0.831698	3.50738e-05
0.834592	2.02907e-05		0.834592	2.45138e-05		0.834592	1.80581e-05		0.834592	2.236e-05		0.834592	2.868e-05		0.834592	3.43877e-05
0.837486	1.99047e-05		0.837486	2.39052e-05		0.837486	1.77724e-05		0.837486	2.19854e-05		0.837486	2.81256e-05		0.837486	3.36949e-05
0.840379	1.95182e-05		0.840379	2.32995e-05		0.840379	1.74766e-05		0.840379	2.16039e-05		0.840379	2.7564e-05		0.840379	3.29972e-05
0.843273	1.91311e-05		0.843273	2.26966e-05		0.843273	1.71711e-05		0.843273	2.1217e-05		0.843273	2.69973e-05		0.843273	3.22965e-05
0.846167	1.87434e-05		0.846167	2.20961e-05		0.846167	1.68567e-05		0.846167	2.0826e-05		0.846167	2.64271e-05		0.846167	3.15947e-05
0.849061	1.8355e-05		0.849061	2.14977e-05		0.849061	1.65347e-05		0.849061	2.0433e-05		0.849061	2.58553e-05		0.849061	3.08939e-05
0.851955	1.79659e-05		0.851955	2.09018e-05		0.851955	1.62077e-05		0.851955	2.00398e-05		0.851955	2.52842e-05		0.851955	3.01972e-05
0.854849	1.75761e-05		0.854849	2.03157e-05		0.854849	1.5878e-05		0.854849	1.96479e-05		0.854849	2.47173e-05		0.854849	2.95081e-05
0.857743	1.71919e-05		0.857743	1.97475e-05		0.857743	1.55479e-05		0.857743	1.92598e-05		0.857743	2.41602e-05		0.857743	2.88308e-05
0.860637	1.68219e-05		0.860637	1.91994e-05		0.860637	1.52203e-05		0.860637	1.8879e-05		0.860637	2.36187e-05		0.860637	2.81714e-05
0.863531	1.64699e-05		0.863531	1.86743e-05		0.863531	1.48988e-05		0.863531	1.85104e-05		0.863531	2.30979e-05		0.863531	2.75381e-05
0.866424	1.61416e-05		0.866424	1.81774e-05		0.866424	1.4589e-05		0.866424	1.81605e-05		0.866424	2.26048e-05		0.866424	2.69413e-05
0.869318	1.58452e-05		0.869318	1.77174e-05		0.869318	1.43018e-05		0.869318	1.78394e-05		0.869318	2.21508e-05		0.869318	2.63968e-05
0.872212	1.55938e-05		0.872212	1.73215e-05		0.872212	1.40535e-05		0.872212	1.75626e-05		0.872212	2.17596e-05		0.872212	2.59297e-05
0.875106	1.54088e-05		0.875106	1.70314e-05		0.875106	1.38668e-05		0.875106	1.73556e-05		0.875106	2.14697e-05		0.875106	2.55814e-05
0.878	1.53371e-05		0.878	1.69184e-05		0.878	1.37921e-05		0.878	1.72734e-05		0.878	2.13553e-05		0.878	2.54435e-05

## Sheet: oh distribution 
SN 0			SN 0.2			SN 0.4			SN 0.6			SN 0.8			SN 1
Axial distance	oh mass fraction		Axial distance	oh mass fraction		Axial distance	oh mass fraction		Axial distance	oh mass fraction		Axial distance	oh mass fraction		Axial distance	oh mass fraction
0.00115113	9.33979e-05		0.00115113	9.29782e-05		0.00115113	9.39565e-05		0.00115113	9.86999e-05		0.00115113	8.43368e-05		0.00115113	8.99031e-05
0.00404502	7.75539e-05		0.00404502	7.80138e-05		0.00404502	8.06661e-05		0.00404502	7.92225e-05		0.00404502	7.2017e-05		0.00404502	7.23209e-05
0.00693891	6.56445e-05		0.00693891	6.7446e-05		0.00693891	7.07727e-05		0.00693891	6.7094e-05		0.00693891	6.23221e-05		0.00693891	6.08574e-05
0.0098328	5.70676e-05		0.0098328	6.05182e-05		0.0098328	6.31984e-05		0.0098328	5.86056e-05		0.0098328	5.31678e-05		0.0098328	5.0633e-05
0.0127267	5.06997e-05		0.0127267	5.39774e-05		0.0127267	5.48555e-05		0.0127267	5.02548e-05		0.0127267	4.34702e-05		0.0127267	3.92957e-05
0.0156206	4.49249e-05		0.0156206	4.70812e-05		0.0156206	4.61068e-05		0.0156206	4.04862e-05		0.0156206	3.30621e-05		0.0156206	2.76748e-05
0.0185145	3.93453e-05		0.0185145	4.13705e-05		0.0185145	3.85718e-05		0.0185145	3.15866e-05		0.0185145	2.30693e-05		0.0185145	1.71329e-05
0.0214084	3.47411e-05		0.0214084	3.66722e-05		0.0214084	3.16082e-05		0.0214084	2.3908e-05		0.0214084	1.44283e-05		0.0214084	9.29142e-06
0.0243023	3.06493e-05		0.0243023	3.21836e-05		0.0243023	2.49772e-05		0.0243023	1.78824e-05		0.0243023	8.41221e-06		0.0243023	5.23232e-06
0.0271961	2.68634e-05		0.0271961	2.76565e-05		0.0271961	1.87649e-05		0.0271961	1.18497e-05		0.0271961	5.17305e-06		0.0271961	3.48255e-06
0.03009	2.39514e-05		0.03009	2.36102e-05		0.03009	1.30573e-05		0.03009	6.18785e-06		0.03009	3.25461e-06		0.03009	2.20292e-06
0.0329839	2.18609e-05		0.0329839	2.01061e-05		0.0329839	8.01994e-06		0.0329839	2.57251e-06		0.0329839	1.86983e-06		0.0329839	1.08974e-06
0.0358778	2.04381e-05		0.0358778	1.70901e-05		0.0358778	3.98814e-06		0.0358778	7.84833e-07		0.0358778	7.82141e-07		0.0358778	2.86448e-07
0.0387717	1.97305e-05		0.0387717	1.44691e-05		0.0387717	1.10017e-06		0.0387717	1.17679e-07		0.0387717	1.78549e-07		0.0387717	2.65435e-17
0.0416656	2.05957e-05		0.0416656	1.22683e-05		0.0416656	9.54911e-17		0.0416656	0		0.0416656	3.83537e-18		0.0416656	2.65435e-17
0.0445595	2.03561e-05		0.0445595	1.04827e-05		0.0445595	0		0.0445595	0		0.0445595	3.83537e-18		0.0445595	0
0.0474534	1.80082e-05		0.0474534	9.03444e-06		0.0474534	0		0.0474534	0		0.0474534	6.80066e-17		0.0474534	3.55415e-18
0.0503473	1.60775e-05		0.0503473	7.90801e-06		0.0503473	0		0.0503473	0		0.0503473	1.02715e-16		0.0503473	3.55415e-18
0.0532412	1.44258e-05		0.0532412	6.98442e-06		0.0532412	1.1695e-07		0.0532412	0		0.0532412	3.4708e-17		0.0532412	2.45961e-17
0.056135	1.24683e-05		0.056135	6.03058e-06		0.056135	1.22161e-06		0.056135	7.00938e-07		0.056135	3.29326e-18		0.056135	2.45961e-17
0.0590289	9.21939e-06		0.0590289	4.84773e-06		0.0590289	3.59905e-06		0.0590289	9.95537e-06		0.0590289	1.049e-06		0.0590289	0
0.0619228	4.32701e-06		0.0619228	2.79668e-06		0.0619228	5.6583e-06		0.0619228	4.42598e-05		0.0619228	1.29724e-05		0.0619228	0
0.0648167	7.74974e-07		0.0648167	7.117e-07		0.0648167	6.54669e-06		0.0648167	4.3513e-05		0.0648167	3.89832e-05		0.0648167	1.11486e-06
0.0677106	1.71949e-06		0.0677106	1.33899e-16		0.0677106	6.89414e-06		0.0677106	8.50764e-06		0.0677106	3.26438e-05		0.0677106	8.7736e-06
0.0706045	6.56197e-06		0.0706045	3.25261e-19		0.0706045	6.97625e-06		0.0706045	1.26635e-16		0.0706045	5.58397e-06		0.0706045	3.2795e-05
0.0734984	1.4213e-05		0.0734984	1.95508e-06		0.0734984	7.34366e-06		0.0734984	1.85613e-05		0.0734984	8.74606e-06		0.0734984	2.88705e-05
0.0763923	2.34838e-05		0.0763923	8.20707e-06		0.0763923	8.65815e-06		0.0763923	6.43214e-05		0.0763923	3.80737e-05		0.0763923	3.73427e-06
0.0792862	3.13173e-05		0.0792862	1.61716e-05		0.0792862	9.80623e-06		0.0792862	0.000106619		0.0792862	7.76817e-05		0.0792862	0
0.0821801	3.60865e-05		0.0821801	2.21379e-05		0.0821801	9.25571e-06		0.0821801	0.000139366		0.0821801	0.000112961		0.0821801	7.78344e-06
0.085074	3.63063e-05		0.085074	2.51855e-05		0.085074	1.29535e-05		0.085074	0.00016224		0.085074	0.00014631		0.085074	2.90211e-05
0.085074	3.63063e-05		0.085074	2.51855e-05		0.085074	1.29535e-05		0.085074	0.00016224		0.085074	0.00014631		0.085074	2.90211e-05
0.0879678	3.0615e-05		0.0879678	2.53998e-05		0.0879678	3.69543e-05		0.0879678	0.000148056		0.0879678	0.000142555		0.0879678	6.09019e-05
0.0908617	2.2038e-05		0.0908617	2.24874e-05		0.0908617	3.79031e-05		0.0908617	0.000112567		0.0908617	0.000103493		0.0908617	8.88471e-05
0.0937556	1.46866e-05		0.0937556	1.69227e-05		0.0937556	1.08805e-05		0.0937556	8.47339e-05		0.0937556	7.28306e-05		0.0937556	0.000108942
0.0966495	9.95605e-06		0.0966495	1.19089e-05		0.0966495	1.20711e-06		0.0966495	6.46141e-05		0.0966495	5.21216e-05		0.0966495	0.000117015
0.0995434	8.37903e-06		0.0995434	9.95661e-06		0.0995434	2.1676e-06		0.0995434	5.00439e-05		0.0995434	3.82057e-05		0.0995434	9.99197e-05
0.102437	9.45182e-06		0.102437	1.11793e-05		0.102437	1.57467e-05		0.102437	3.91212e-05		0.102437	2.85488e-05		0.102437	7.37705e-05
0.105331	1.26824e-05		0.105331	1.46177e-05		0.105331	4.39803e-05		0.105331	3.07631e-05		0.105331	2.16393e-05		0.105331	5.38158e-05
0.108225	1.65021e-05		0.108225	2.01168e-05		0.108225	8.17493e-05		0.108225	2.42857e-05		0.108225	1.65818e-05		0.108225	3.95809e-05
0.111119	1.65092e-05		0.111119	2.26195e-05		0.111119	0.000123433		0.111119	1.92271e-05		0.111119	1.28295e-05		0.111119	2.96093e-05
0.114013	9.73542e-06		0.114013	1.76535e-05		0.114013	0.000160803		0.114013	1.52501e-05		0.114013	1.00147e-05		0.114013	2.24874e-05
0.116907	5.10974e-06		0.116907	1.39276e-05		0.116907	0.00020174		0.116907	1.21047e-05		0.116907	7.90603e-06		0.116907	1.7305e-05
0.119801	1.00854e-05		0.119801	1.72381e-05		0.119801	0.000247163		0.119801	9.61914e-06		0.119801	6.31307e-06		0.119801	1.34922e-05
0.122695	2.08337e-05		0.122695	2.7371e-05		0.122695	0.000260035		0.122695	7.65448e-06		0.122695	5.08742e-06		0.122695	1.06648e-05
0.125588	3.37441e-05		0.125588	4.22507e-05		0.125588	0.000229761		0.125588	6.08968e-06		0.125588	4.14931e-06		0.125588	8.5477e-06
0.128482	4.63318e-05		0.128482	5.62869e-05		0.128482	0.000186362		0.128482	4.83536e-06		0.128482	3.43576e-06		0.128482	6.9637e-06
0.131376	5.75172e-05		0.131376	6.62364e-05		0.131376	0.000147367		0.131376	3.83638e-06		0.131376	2.89767e-06		0.131376	5.79137e-06
0.13427	6.60888e-05		0.13427	7.17342e-05		0.13427	0.000115923		0.13427	3.04861e-06		0.13427	2.49599e-06		0.13427	4.92179e-06
0.137164	7.19081e-05		0.137164	7.39421e-05		0.137164	9.13741e-05		0.137164	2.43435e-06		0.137164	2.19827e-06		0.137164	4.26689e-06
0.140058	7.58457e-05		0.140058	7.4168e-05		0.140058	7.23305e-05		0.140058	1.962e-06		0.140058	1.97853e-06		0.140058	3.77383e-06
0.142952	7.79184e-05		0.142952	7.36823e-05		0.142952	5.75217e-05		0.142952	1.60469e-06		0.142952	1.81763e-06		0.142952	3.40211e-06
0.145846	7.85648e-05		0.145846	7.23409e-05		0.145846	4.59078e-05		0.145846	1.33921e-06		0.145846	1.70069e-06		0.145846	3.12084e-06
0.14874	7.87947e-05		0.14874	7.00385e-05		0.14874	3.67245e-05		0.14874	1.14636e-06		0.14874	1.61629e-06		0.14874	2.90647e-06
0.151633	7.83231e-05		0.151633	6.72753e-05		0.151633	2.94476e-05		0.151633	1.00673e-06		0.151633	1.55582e-06		0.151633	2.74127e-06
0.154527	7.71114e-05		0.154527	6.43553e-05		0.154527	2.36625e-05		0.154527	9.04638e-07		0.154527	1.51286e-06		0.154527	2.61202e-06
0.157421	7.49865e-05		0.157421	6.15019e-05		0.157421	1.90289e-05		0.157421	8.3117e-07		0.157421	1.48263e-06		0.157421	2.50885e-06
0.160315	7.12954e-05		0.160315	5.87123e-05		0.160315	1.53141e-05		0.160315	7.79342e-07		0.160315	1.46149e-06		0.160315	2.42422e-06
0.163209	7.00325e-05		0.163209	5.58996e-05		0.163209	1.2336e-05		0.163209	7.43735e-07		0.163209	1.44675e-06		0.163209	2.3525e-06
0.166103	7.11037e-05		0.166103	5.29638e-05		0.166103	9.92904e-06		0.166103	7.20215e-07		0.166103	1.43633e-06		0.166103	2.29017e-06
0.166103	7.11037e-05		0.166103	5.29638e-05		0.166103	9.92904e-06		0.166103	7.20215e-07		0.166103	1.43633e-06		0.166103	2.29017e-06
0.168997	6.98839e-05		0.168997	5.00862e-05		0.168997	7.96185e-06		0.168997	7.04815e-07		0.168997	1.42859e-06		0.168997	2.23737e-06
0.171891	6.74078e-05		0.171891	4.80221e-05		0.171891	6.47265e-06		0.171891	6.94555e-07		0.171891	1.42265e-06		0.171891	2.19354e-06
0.174785	6.51778e-05		0.174785	4.69192e-05		0.174785	5.34542e-06		0.174785	6.88046e-07		0.174785	1.41809e-06		0.174785	2.15715e-06
0.177678	6.24236e-05		0.177678	4.60436e-05		0.177678	4.40351e-06		0.177678	6.84221e-07		0.177678	1.41392e-06		0.177678	2.12856e-06
0.180572	5.96094e-05		0.180572	4.60956e-05		0.180572	3.65774e-06		0.180572	6.82161e-07		0.180572	1.40939e-06		0.180572	2.10611e-06
0.183466	5.75664e-05		0.183466	4.63924e-05		0.183466	3.07169e-06		0.183466	6.81124e-07		0.183466	1.40444e-06		0.183466	2.0868e-06
0.18636	5.48518e-05		0.18636	4.61258e-05		0.18636	2.61281e-06		0.18636	6.80849e-07		0.18636	1.39979e-06		0.18636	2.07134e-06
0.189254	5.17499e-05		0.189254	4.6031e-05		0.189254	2.25485e-06		0.189254	6.81557e-07		0.189254	1.39618e-06		0.189254	2.06074e-06
0.192148	4.97917e-05		0.192148	4.55691e-05		0.192148	1.97538e-06		0.192148	6.83374e-07		0.192148	1.39164e-06		0.192148	2.05348e-06
0.195042	4.80863e-05		0.195042	4.49733e-05		0.195042	1.76065e-06		0.195042	6.85489e-07		0.195042	1.38442e-06		0.195042	2.04899e-06
0.197936	4.66321e-05		0.197936	4.67358e-05		0.197936	1.59855e-06		0.197936	6.86928e-07		0.197936	1.37654e-06		0.197936	2.04715e-06
0.20083	4.60461e-05		0.20083	4.97914e-05		0.20083	1.47814e-06		0.20083	6.87542e-07		0.20083	1.36967e-06		0.20083	2.04779e-06
0.203723	4.50793e-05		0.203723	5.13046e-05		0.203723	1.39034e-06		0.203723	6.87428e-07		0.203723	1.36356e-06		0.203723	2.05087e-06
0.206617	4.53714e-05		0.206617	5.18187e-05		0.206617	1.32611e-06		0.206617	6.8703e-07		0.206617	1.35781e-06		0.206617	2.05668e-06
0.209511	4.74267e-05		0.209511	5.15108e-05		0.209511	1.27836e-06		0.209511	6.87204e-07		0.209511	1.3522e-06		0.209511	2.06546e-06
0.212405	4.98142e-05		0.212405	5.09841e-05		0.212405	1.24373e-06		0.212405	6.88508e-07		0.212405	1.34683e-06		0.212405	2.07726e-06
0.215299	5.10322e-05		0.215299	4.95749e-05		0.215299	1.21949e-06		0.215299	6.89945e-07		0.215299	1.3418e-06		0.215299	2.09243e-06
0.215299	5.10322e-05		0.215299	4.95749e-05		0.215299	1.21949e-06		0.215299	6.89945e-07		0.215299	1.3418e-06		0.215299	2.09243e-06
0.218193	5.08381e-05		0.218193	4.7714e-05		0.218193	1.20274e-06		0.218193	6.89901e-07		0.218193	1.33695e-06		0.218193	2.10876e-06
0.221087	5.0886e-05		0.221087	4.68322e-05		0.221087	1.19101e-06		0.221087	6.87487e-07		0.221087	1.33199e-06		0.221087	2.12279e-06
0.223981	5.07734e-05		0.223981	4.52114e-05		0.223981	1.18277e-06		0.223981	6.83776e-07		0.223981	1.32671e-06		0.223981	2.13299e-06
0.226875	5.06138e-05		0.226875	4.36965e-05		0.226875	1.1771e-06		0.226875	6.80704e-07		0.226875	1.32107e-06		0.226875	2.13867e-06
0.229768	5.08505e-05		0.229768	4.42442e-05		0.229768	1.1733e-06		0.229768	6.78607e-07		0.229768	1.31507e-06		0.229768	2.13981e-06
0.232662	5.11814e-05		0.232662	4.60534e-05		0.232662	1.17076e-06		0.232662	6.77052e-07		0.232662	1.3089e-06		0.232662	2.13797e-06
0.235556	5.11181e-05		0.235556	4.82692e-05		0.235556	1.16866e-06		0.235556	6.75546e-07		0.235556	1.30276e-06		0.235556	2.13463e-06
0.23845	4.96255e-05		0.23845	4.88571e-05		0.23845	1.16587e-06		0.23845	6.73792e-07		0.23845	1.29664e-06		0.23845	2.12996e-06
0.241344	4.82051e-05		0.241344	4.7526e-05		0.241344	1.16182e-06		0.241344	6.71686e-07		0.241344	1.29047e-06		0.241344	2.12422e-06
0.244238	4.87295e-05		0.244238	4.68682e-05		0.244238	1.15753e-06		0.244238	6.69295e-07		0.244238	1.28419e-06		0.244238	2.11763e-06
0.247132	5.0215e-05		0.247132	4.8417e-05		0.247132	1.15528e-06		0.247132	6.66712e-07		0.247132	1.27778e-06		0.247132	2.11042e-06
0.250026	5.16602e-05		0.250026	5.21638e-05		0.250026	1.1562e-06		0.250026	6.63974e-07		0.250026	1.27125e-06		0.250026	2.10277e-06
0.25292	5.13841e-05		0.25292	5.70577e-05		0.25292	1.15767e-06		0.25292	6.61105e-07		0.25292	1.26459e-06		0.25292	2.09487e-06
0.255814	4.9434e-05		0.255814	6.23975e-05		0.255814	1.15756e-06		0.255814	6.58115e-07		0.255814	1.25778e-06		0.255814	2.08693e-06
0.258707	4.7259e-05		0.258707	6.79671e-05		0.258707	1.15634e-06		0.258707	6.55003e-07		0.258707	1.25083e-06		0.258707	2.07914e-06
0.261601	4.52999e-05		0.261601	7.33486e-05		0.261601	1.15413e-06		0.261601	6.51757e-07		0.261601	1.24373e-06		0.261601	2.07168e-06
0.264495	4.50177e-05		0.264495	7.81872e-05		0.264495	1.15174e-06		0.264495	6.48379e-07		0.264495	1.23647e-06		0.264495	2.06467e-06
0.267389	4.54847e-05		0.267389	8.21888e-05		0.267389	1.15184e-06		0.267389	6.45016e-07		0.267389	1.22905e-06		0.267389	2.0582e-06
0.270283	4.65775e-05		0.270283	8.42048e-05		0.270283	1.15703e-06		0.270283	6.41881e-07		0.270283	1.22168e-06		0.270283	2.05238e-06
0.273177	4.92908e-05		0.273177	8.40835e-05		0.273177	1.16619e-06		0.273177	6.38986e-07		0.273177	1.21455e-06		0.273177	2.04723e-06
0.276071	5.23633e-05		0.276071	8.29113e-05		0.276071	1.17246e-06		0.276071	6.36217e-07		0.276071	1.20763e-06		0.276071	2.04261e-06
0.278965	5.56512e-05		0.278965	8.17474e-05		0.278965	1.16933e-06		0.278965	6.3348e-07		0.278965	1.2009e-06		0.278965	2.0383e-06
0.281859	5.93445e-05		0.281859	8.06373e-05		0.281859	1.16164e-06		0.281859	6.30711e-07		0.281859	1.19435e-06		0.281859	2.03401e-06
0.284752	6.27829e-05		0.284752	7.96808e-05		0.284752	1.15747e-06		0.284752	6.2788e-07		0.284752	1.18799e-06		0.284752	2.02942e-06
0.287646	6.68272e-05		0.287646	7.97903e-05		0.287646	1.15796e-06		0.287646	6.24974e-07		0.287646	1.18184e-06		0.287646	2.02438e-06
0.29054	7.11046e-05		0.29054	8.03761e-05		0.29054	1.16159e-06		0.29054	6.21982e-07		0.29054	1.17593e-06		0.29054	2.01876e-06
0.293434	7.39807e-05		0.293434	8.16564e-05		0.293434	1.16663e-06		0.293434	6.18893e-07		0.293434	1.17023e-06		0.293434	2.01245e-06
0.296328	7.61951e-05		0.296328	8.40926e-05		0.296328	1.17198e-06		0.296328	6.15699e-07		0.296328	1.1647e-06		0.296328	2.00536e-06
0.299222	7.77187e-05		0.299222	8.62071e-05		0.299222	1.17706e-06		0.299222	6.12395e-07		0.299222	1.15931e-06		0.299222	1.99744e-06
0.302116	7.85086e-05		0.302116	8.65407e-05		0.302116	1.18186e-06		0.302116	6.08986e-07		0.302116	1.15404e-06		0.302116	1.98867e-06
0.30501	7.87767e-05		0.30501	8.47484e-05		0.30501	1.1867e-06		0.30501	6.05483e-07		0.30501	1.14886e-06		0.30501	1.97909e-06
0.307904	7.79113e-05		0.307904	8.24283e-05		0.307904	1.19171e-06		0.307904	6.01897e-07		0.307904	1.14373e-06		0.307904	1.96879e-06
0.310797	7.5843e-05		0.310797	8.35375e-05		0.310797	1.19696e-06		0.310797	5.98231e-07		0.310797	1.13862e-06		0.310797	1.95792e-06
0.313691	7.44602e-05		0.313691	8.68619e-05		0.313691	1.20238e-06		0.313691	5.94468e-07		0.313691	1.1335e-06		0.313691	1.94675e-06
0.313691	7.44602e-05		0.313691	8.68619e-05		0.313691	1.20238e-06		0.313691	5.94468e-07		0.313691	1.1335e-06		0.313691	1.94675e-06
0.316585	7.48776e-05		0.316585	8.94356e-05		0.316585	1.20759e-06		0.316585	5.91133e-07		0.316585	1.12813e-06		0.316585	1.93417e-06
0.319479	7.65669e-05		0.319479	9.21398e-05		0.319479	1.21238e-06		0.319479	5.88709e-07		0.319479	1.12235e-06		0.319479	1.91919e-06
0.322373	7.9212e-05		0.322373	9.58189e-05		0.322373	1.21668e-06		0.322373	5.8708e-07		0.322373	1.11616e-06		0.322373	1.90284e-06
0.325267	8.23064e-05		0.325267	9.86867e-05		0.325267	1.2204e-06		0.325267	5.86144e-07		0.325267	1.10989e-06		0.325267	1.88584e-06
0.328161	8.58884e-05		0.328161	0.000102725		0.328161	1.22362e-06		0.328161	5.8584e-07		0.328161	1.10382e-06		0.328161	1.86834e-06
0.331055	8.96067e-05		0.331055	0.000107431		0.331055	1.22713e-06		0.331055	5.86131e-07		0.331055	1.09794e-06		0.331055	1.85043e-06
0.333949	9.20579e-05		0.333949	0.000111871		0.333949	1.2313e-06		0.333949	5.86965e-07		0.333949	1.09226e-06		0.333949	1.8322e-06
0.336842	9.2761e-05		0.336842	0.000117266		0.336842	1.23552e-06		0.336842	5.88273e-07		0.336842	1.08677e-06		0.336842	1.81368e-06
0.339736	9.19888e-05		0.339736	0.000120572		0.339736	1.23928e-06		0.339736	5.89987e-07		0.339736	1.08146e-06		0.339736	1.79492e-06
0.34263	8.83109e-05		0.34263	0.000122756		0.34263	1.24332e-06		0.34263	5.92054e-07		0.34263	1.07633e-06		0.34263	1.77595e-06
0.345524	8.6286e-05		0.345524	0.000126158		0.345524	1.24839e-06		0.345524	5.94436e-07		0.345524	1.07137e-06		0.345524	1.7568e-06
0.348418	8.73285e-05		0.348418	0.000132004		0.348418	1.25423e-06		0.348418	5.97116e-07		0.348418	1.06654e-06		0.348418	1.73749e-06
0.351312	8.86162e-05		0.351312	0.000139642		0.351312	1.26067e-06		0.351312	5.99982e-07		0.351312	1.06183e-06		0.351312	1.71803e-06
0.354206	9.21231e-05		0.354206	0.000146397		0.354206	1.26759e-06		0.354206	6.02926e-07		0.354206	1.0572e-06		0.354206	1.6984e-06
0.3571	9.545e-05		0.3571	0.00015096		0.3571	1.27488e-06		0.3571	6.05951e-07		0.3571	1.05262e-06		0.3571	1.67857e-06
0.359994	9.71275e-05		0.359994	0.000154149		0.359994	1.28245e-06		0.359994	6.09046e-07		0.359994	1.04804e-06		0.359994	1.65928e-06
0.362887	9.96437e-05		0.362887	0.00016014		0.362887	1.29025e-06		0.362887	6.12197e-07		0.362887	1.04342e-06		0.362887	1.6413e-06
0.365781	0.000101664		0.365781	0.000171726		0.365781	1.29826e-06		0.365781	6.15389e-07		0.365781	1.03872e-06		0.365781	1.62468e-06
0.368675	0.00010122		0.368675	0.00018613		0.368675	1.30646e-06		0.368675	6.18604e-07		0.368675	1.03388e-06		0.368675	1.60951e-06
0.371569	0.000100785		0.371569	0.000198857		0.371569	1.31477e-06		0.371569	6.21824e-07		0.371569	1.02885e-06		0.371569	1.59586e-06
0.374463	0.000103356		0.374463	0.00020511		0.374463	1.32314e-06		0.374463	6.25026e-07		0.374463	1.02392e-06		0.374463	1.58379e-06
0.377357	0.000110763		0.377357	0.000209194		0.377357	1.33152e-06		0.377357	6.2819e-07		0.377357	1.01939e-06		0.377357	1.57336e-06
0.380251	0.00012267		0.380251	0.000220415		0.380251	1.33977e-06		0.380251	6.31299e-07		0.380251	1.01523e-06		0.380251	1.56463e-06
0.383145	0.000134201		0.383145	0.000235341		0.383145	1.34822e-06		0.383145	6.34332e-07		0.383145	1.0114e-06		0.383145	1.55763e-06
0.386039	0.000144891		0.386039	0.000252499		0.386039	1.35719e-06		0.386039	6.3726e-07		0.386039	1.0079e-06		0.386039	1.55236e-06
0.388932	0.00014971		0.388932	0.000281737		0.388932	1.36648e-06		0.388932	6.40037e-07		0.388932	1.00468e-06		0.388932	1.54882e-06
0.391826	0.000149462		0.391826	0.000317699		0.391826	1.376e-06		0.391826	6.42607e-07		0.391826	1.0017e-06		0.391826	1.547e-06
0.39472	0.000162284		0.39472	0.000346671		0.39472	1.3857e-06		0.39472	6.44898e-07		0.39472	9.98937e-07		0.39472	1.547e-06
0.397614	0.000189077		0.397614	0.00037263		0.397614	1.39544e-06		0.397614	6.4682e-07		0.397614	9.96317e-07		0.397614	1.54803e-06
0.400508	0.000215644		0.400508	0.000397853		0.400508	1.40494e-06		0.400508	6.48255e-07		0.400508	9.93772e-07		0.400508	1.54925e-06
0.403402	0.000248716		0.403402	0.000418687		0.403402	1.41404e-06		0.403402	6.49096e-07		0.403402	9.91246e-07		0.403402	1.55061e-06
0.403402	0.000248716		0.403402	0.000418687		0.403402	1.41404e-06		0.403402	6.49096e-07		0.403402	9.91246e-07		0.403402	1.55061e-06
0.406296	0.0002887		0.406296	0.000443189		0.406296	1.4227e-06		0.406296	6.49596e-07		0.406296	9.88696e-07		0.406296	1.55162e-06
0.40919	0.000322171		0.40919	0.000470004		0.40919	1.43095e-06		0.40919	6.50015e-07		0.40919	9.86085e-07		0.40919	1.55182e-06
0.412084	0.000349731		0.412084	0.000497868		0.412084	1.43875e-06		0.412084	6.50454e-07		0.412084	9.83388e-07		0.412084	1.55104e-06
0.414977	0.000373423		0.414977	0.000533648		0.414977	1.44608e-06		0.414977	6.51015e-07		0.414977	9.80556e-07		0.414977	1.54919e-06
0.417871	0.000393435		0.417871	0.000576337		0.417871	1.45295e-06		0.417871	6.51669e-07		0.417871	9.77544e-07		0.417871	1.54623e-06
0.420765	0.000414362		0.420765	0.000621757		0.420765	1.45932e-06		0.420765	6.52393e-07		0.420765	9.74464e-07		0.420765	1.54213e-06
0.423659	0.000435037		0.423659	0.000666513		0.423659	1.46601e-06		0.423659	6.53168e-07		0.423659	9.71443e-07		0.423659	1.53687e-06
0.426553	0.000459192		0.426553	0.000706496		0.426553	1.47386e-06		0.426553	6.5398e-07		0.426553	9.68472e-07		0.426553	1.53047e-06
0.429447	0.000485484		0.429447	0.000737201		0.429447	1.48275e-06		0.429447	6.54822e-07		0.429447	9.65554e-07		0.429447	1.52292e-06
0.432341	0.000510616		0.432341	0.000756265		0.432341	1.49253e-06		0.432341	6.55696e-07		0.432341	9.62694e-07		0.432341	1.51449e-06
0.435235	0.000541752		0.435235	0.000761796		0.435235	1.50312e-06		0.435235	6.56605e-07		0.435235	9.59901e-07		0.435235	1.5055e-06
0.438129	0.000573295		0.438129	0.000756671		0.438129	1.51463e-06		0.438129	6.57553e-07		0.438129	9.57183e-07		0.438129	1.49603e-06
0.441023	0.000600596		0.441023	0.000744266		0.441023	1.52719e-06		0.441023	6.58534e-07		0.441023	9.54547e-07		0.441023	1.48616e-06
0.443916	0.000623158		0.443916	0.00072475		0.443916	1.5405e-06		0.443916	6.59537e-07		0.443916	9.52e-07		0.443916	1.47598e-06
0.44681	0.000639622		0.44681	0.000699909		0.44681	1.55426e-06		0.44681	6.60555e-07		0.44681	9.49541e-07		0.44681	1.46556e-06
0.449704	0.000649237		0.449704	0.000672053		0.449704	1.56856e-06		0.449704	6.61582e-07		0.449704	9.47163e-07		0.449704	1.45496e-06
0.452598	0.000650399		0.452598	0.00064228		0.452598	1.58339e-06		0.452598	6.6261e-07		0.452598	9.44855e-07		0.452598	1.44426e-06
0.455492	0.000642922		0.455492	0.000609916		0.455492	1.59869e-06		0.455492	6.63624e-07		0.455492	9.42611e-07		0.455492	1.4335e-06
0.458386	0.000628022		0.458386	0.000575463		0.458386	1.61441e-06		0.458386	6.64599e-07		0.458386	9.4043e-07		0.458386	1.42271e-06
0.46128	0.000607006		0.46128	0.000541474		0.46128	1.63052e-06		0.46128	6.6549e-07		0.46128	9.38308e-07		0.46128	1.41192e-06
0.464174	0.000582318		0.464174	0.000509303		0.464174	1.64694e-06		0.464174	6.66226e-07		0.464174	9.36294e-07		0.464174	1.40116e-06
0.467068	0.000555754		0.467068	0.000478204		0.467068	1.66362e-06		0.467068	6.66717e-07		0.467068	9.34435e-07		0.467068	1.39045e-06
0.469961	0.000527379		0.469961	0.000446953		0.469961	1.68047e-06		0.469961	6.67147e-07		0.469961	9.32713e-07		0.469961	1.37994e-06
0.472855	0.000496595		0.472855	0.000416144		0.472855	1.69742e-06		0.472855	6.6777e-07		0.472855	9.31099e-07		0.472855	1.36975e-06
0.475749	0.000465286		0.475749	0.00038656		0.475749	1.71435e-06		0.475749	6.6862e-07		0.475749	9.29572e-07		0.475749	1.35986e-06
0.478643	0.000434644		0.478643	0.00035839		0.478643	1.73108e-06		0.478643	6.69712e-07		0.478643	9.28158e-07		0.478643	1.35024e-06
0.481537	0.000404583		0.481537	0.000331689		0.481537	1.74743e-06		0.481537	6.71057e-07		0.481537	9.26878e-07		0.481537	1.34086e-06
0.484431	0.00037584		0.484431	0.00030658		0.484431	1.76329e-06		0.484431	6.72615e-07		0.484431	9.25719e-07		0.484431	1.33175e-06
0.487325	0.0003487		0.487325	0.00028311		0.487325	1.77854e-06		0.487325	6.74277e-07		0.487325	9.24666e-07		0.487325	1.32289e-06
0.490219	0.00032358		0.490219	0.000261178		0.490219	1.793e-06		0.490219	6.75993e-07		0.490219	9.23687e-07		0.490219	1.31423e-06
0.493113	0.000300361		0.493113	0.000240712		0.493113	1.80637e-06		0.493113	6.78003e-07		0.493113	9.22688e-07		0.493113	1.30571e-06
0.496006	0.000277964		0.496006	0.00022155		0.496006	1.81911e-06		0.496006	6.80499e-07		0.496006	9.21571e-07		0.496006	1.29717e-06
0.4989	0.000256206		0.4989	0.00020383		0.4989	1.83216e-06		0.4989	6.83204e-07		0.4989	9.20447e-07		0.4989	1.28849e-06
0.501794	0.000235507		0.501794	0.000187545		0.501794	1.84588e-06		0.501794	6.85844e-07		0.501794	9.19514e-07		0.501794	1.27983e-06
0.504688	0.000216166		0.504688	0.000172607		0.504688	1.86034e-06		0.504688	6.8843e-07		0.504688	9.18578e-07		0.504688	1.27177e-06
0.507582	0.000198257		0.507582	0.000158969		0.507582	1.87543e-06		0.507582	6.91035e-07		0.507582	9.17341e-07		0.507582	1.26451e-06
0.510476	0.000181761		0.510476	0.000146384		0.510476	1.89103e-06		0.510476	6.93672e-07		0.510476	9.15989e-07		0.510476	1.258e-06
0.51337	0.000166518		0.51337	0.000134736		0.51337	1.90697e-06		0.51337	6.96283e-07		0.51337	9.14785e-07		0.51337	1.25232e-06
0.516264	0.00015242		0.516264	0.000123908		0.516264	1.92303e-06		0.516264	6.98792e-07		0.516264	9.1373e-07		0.516264	1.24754e-06
0.519158	0.000139673		0.519158	0.000113973		0.519158	1.9389e-06		0.519158	7.01118e-07		0.519158	9.12762e-07		0.519158	1.24366e-06
0.522051	0.000128156		0.522051	0.000104825		0.522051	1.95412e-06		0.522051	7.03156e-07		0.522051	9.11795e-07		0.522051	1.2407e-06
0.524945	0.000117611		0.524945	9.64835e-05		0.524945	1.96813e-06		0.524945	7.04759e-07		0.524945	9.10724e-07		0.524945	1.23868e-06
0.524945	0.000117611		0.524945	9.64835e-05		0.524945	1.96813e-06		0.524945	7.04759e-07		0.524945	9.10724e-07		0.524945	1.23868e-06
0.527839	0.000107925		0.527839	8.8986e-05		0.527839	1.98164e-06		0.527839	7.06184e-07		0.527839	9.09681e-07		0.527839	1.23723e-06
0.530733	9.90045e-05		0.530733	8.2095e-05		0.530733	1.99569e-06		0.530733	7.07776e-07		0.530733	9.08855e-07		0.530733	1.23584e-06
0.533627	9.08333e-05		0.533627	7.57221e-05		0.533627	2.01029e-06		0.533627	7.09545e-07		0.533627	9.08192e-07		0.533627	1.23441e-06
0.536521	8.34092e-05		0.536521	6.98592e-05		0.536521	2.0254e-06		0.536521	7.11511e-07		0.536521	9.07636e-07		0.536521	1.23285e-06
0.539415	7.67008e-05		0.539415	6.44501e-05		0.539415	2.04101e-06		0.539415	7.13685e-07		0.539415	9.07181e-07		0.539415	1.23107e-06
0.542309	7.05298e-05		0.542309	5.94497e-05		0.542309	2.05707e-06		0.542309	7.16082e-07		0.542309	9.0683e-07		0.542309	1.22929e-06
0.545203	6.48082e-05		0.545203	5.48681e-05		0.545203	2.07357e-06		0.545203	7.18709e-07		0.545203	9.06577e-07		0.545203	1.22775e-06
0.548096	5.95724e-05		0.548096	5.07051e-05		0.548096	2.09037e-06		0.548096	7.21558e-07		0.548096	9.06397e-07		0.548096	1.2264e-06
0.55099	5.48573e-05		0.55099	4.68699e-05		0.55099	2.10734e-06		0.55099	7.24611e-07		0.55099	9.06261e-07		0.55099	1.2252e-06
0.553884	5.06471e-05		0.553884	4.33193e-05		0.553884	2.12426e-06		0.553884	7.2784e-07		0.553884	9.06288e-07		0.553884	1.22409e-06
0.556778	4.68442e-05		0.556778	4.00776e-05		0.556778	2.14092e-06		0.556778	7.31208e-07		0.556778	9.06608e-07		0.556778	1.22302e-06
0.559672	4.33393e-05		0.559672	3.71256e-05		0.559672	2.15704e-06		0.559672	7.34677e-07		0.559672	9.072e-07		0.559672	1.22195e-06
0.562566	4.00321e-05		0.562566	3.44308e-05		0.562566	2.17231e-06		0.562566	7.38205e-07		0.562566	9.08036e-07		0.562566	1.22081e-06
0.56546	3.69195e-05		0.56546	3.19413e-05		0.56546	2.18636e-06		0.56546	7.41747e-07		0.56546	9.0909e-07		0.56546	1.21955e-06
0.568354	3.40518e-05		0.568354	2.96451e-05		0.568354	2.20035e-06		0.568354	7.45252e-07		0.568354	9.10333e-07		0.568354	1.2181e-06
0.571248	3.14263e-05		0.571248	2.75504e-05		0.571248	2.2156e-06		0.571248	7.48661e-07		0.571248	9.11739e-07		0.571248	1.21638e-06
0.574142	2.9024e-05		0.574142	2.56432e-05		0.574142	2.23209e-06		0.574142	7.51897e-07		0.574142	9.13273e-07		0.574142	1.21432e-06
0.577035	2.68271e-05		0.577035	2.39081e-05		0.577035	2.24971e-06		0.577035	7.54872e-07		0.577035	9.1489e-07		0.577035	1.21185e-06
0.579929	2.48232e-05		0.579929	2.22984e-05		0.579929	2.26839e-06		0.579929	7.57499e-07		0.579929	9.16542e-07		0.579929	1.20926e-06
0.582823	2.29973e-05		0.582823	2.07886e-05		0.582823	2.28801e-06		0.582823	7.60038e-07		0.582823	9.18189e-07		0.582823	1.2069e-06
0.585717	2.13315e-05		0.585717	1.93865e-05		0.585717	2.30849e-06		0.585717	7.62795e-07		0.585717	9.19799e-07		0.585717	1.20476e-06
0.588611	1.98103e-05		0.588611	1.80823e-05		0.588611	2.32975e-06		0.588611	7.6577e-07		0.588611	9.21334e-07		0.588611	1.20283e-06
0.591505	1.8412e-05		0.591505	1.68701e-05		0.591505	2.35171e-06		0.591505	7.68954e-07		0.591505	9.22756e-07		0.591505	1.2011e-06
0.594399	1.71226e-05		0.594399	1.57489e-05		0.594399	2.37428e-06		0.594399	7.72334e-07		0.594399	9.24018e-07		0.594399	1.19955e-06
0.597293	1.59387e-05		0.597293	1.4712e-05		0.597293	2.39738e-06		0.597293	7.75897e-07		0.597293	9.25068e-07		0.597293	1.19815e-06
0.600186	1.48527e-05		0.600186	1.3742e-05		0.600186	2.4209e-06		0.600186	7.79625e-07		0.600186	9.26071e-07		0.600186	1.19688e-06
0.60308	1.38578e-05		0.60308	1.28379e-05		0.60308	2.44476e-06		0.60308	7.83501e-07		0.60308	9.2722e-07		0.60308	1.1957e-06
0.605974	1.29452e-05		0.605974	1.20057e-05		0.605974	2.46884e-06		0.605974	7.87504e-07		0.605974	9.2851e-07		0.605974	1.19457e-06
0.608868	1.20994e-05		0.608868	1.12399e-05		0.608868	2.49303e-06		0.608868	7.91611e-07		0.608868	9.2993e-07		0.608868	1.19344e-06
0.611762	1.13047e-05		0.611762	1.05346e-05		0.611762	2.51719e-06		0.611762	7.95797e-07		0.611762	9.31465e-07		0.611762	1.19226e-06
0.614656	1.05574e-05		0.614656	9.88492e-06		0.614656	2.54118e-06		0.614656	8.00034e-07		0.614656	9.33099e-07		0.614656	1.19097e-06
0.61755	9.85812e-06		0.61755	9.28649e-06		0.61755	2.56485e-06		0.61755	8.04295e-07		0.61755	9.34817e-07		0.61755	1.1895e-06
0.620444	9.2057e-06		0.620444	8.7347e-06		0.620444	2.588e-06		0.620444	8.08547e-07		0.620444	9.36603e-07		0.620444	1.18813e-06
0.623338	8.59924e-06		0.623338	8.22202e-06		0.623338	2.61043e-06		0.623338	8.12758e-07		0.623338	9.3844e-07		0.623338	1.1872e-06
0.626231	8.03685e-06		0.626231	7.74244e-06		0.626231	2.63195e-06		0.626231	8.1689e-07		0.626231	9.40312e-07		0.626231	1.18673e-06
0.629125	7.51671e-06		0.629125	7.29484e-06		0.629125	2.65232e-06		0.629125	8.20903e-07		0.629125	9.42201e-07		0.629125	1.18672e-06
0.632019	7.03676e-06		0.632019	6.8783e-06		0.632019	2.67136e-06		0.632019	8.24752e-07		0.632019	9.44094e-07		0.632019	1.18717e-06
0.634913	6.5955e-06		0.634913	6.49155e-06		0.634913	2.6889e-06		0.634913	8.28389e-07		0.634913	9.45976e-07		0.634913	1.18811e-06
0.637807	6.18976e-06		0.637807	6.13355e-06		0.637807	2.70475e-06		0.637807	8.31763e-07		0.637807	9.47842e-07		0.637807	1.18958e-06
0.640701	5.81816e-06		0.640701	5.80391e-06		0.640701	2.72074e-06		0.640701	8.35204e-07		0.640701	9.49691e-07		0.640701	1.19163e-06
0.643595	5.48273e-06		0.643595	5.50332e-06		0.643595	2.73892e-06		0.643595	8.39111e-07		0.643595	9.51521e-07		0.643595	1.19441e-06
0.643595	5.48273e-06		0.643595	5.50332e-06		0.643595	2.73892e-06		0.643595	8.39111e-07		0.643595	9.51521e-07		0.643595	1.19441e-06
0.646489	5.17529e-06		0.646489	5.22851e-06		0.646489	2.75866e-06		0.646489	8.43341e-07		0.646489	9.53218e-07		0.646489	1.19758e-06
0.649383	4.8869e-06		0.649383	4.97246e-06		0.649383	2.77928e-06		0.649383	8.47726e-07		0.649383	9.54864e-07		0.649383	1.20074e-06
0.652277	4.61848e-06		0.652277	4.73218e-06		0.652277	2.80067e-06		0.652277	8.52262e-07		0.652277	9.56638e-07		0.652277	1.2038e-06
0.65517	4.36768e-06		0.65517	4.50804e-06		0.65517	2.82263e-06		0.65517	8.5691e-07		0.65517	9.58526e-07		0.65517	1.20666e-06
0.658064	4.13202e-06		0.658064	4.29979e-06		0.658064	2.845e-06		0.658064	8.61634e-07		0.658064	9.60498e-07		0.658064	1.20916e-06
0.660958	3.91363e-06		0.660958	4.10554e-06		0.660958	2.86766e-06		0.660958	8.66405e-07		0.660958	9.62528e-07		0.660958	1.2112e-06
0.663852	3.71058e-06		0.663852	3.92233e-06		0.663852	2.89056e-06		0.663852	8.71204e-07		0.663852	9.646e-07		0.663852	1.21297e-06
0.666746	3.52084e-06		0.666746	3.74922e-06		0.666746	2.91358e-06		0.666746	8.76002e-07		0.666746	9.66686e-07		0.666746	1.21475e-06
0.66964	3.34598e-06		0.66964	3.58583e-06		0.66964	2.93662e-06		0.66964	8.80776e-07		0.66964	9.68767e-07		0.66964	1.21653e-06
0.672534	3.18616e-06		0.672534	3.43183e-06		0.672534	2.95959e-06		0.672534	8.85507e-07		0.672534	9.70821e-07		0.672534	1.21827e-06
0.675428	3.03895e-06		0.675428	3.28748e-06		0.675428	2.9824e-06		0.675428	8.90172e-07		0.675428	9.72832e-07		0.675428	1.21995e-06
0.678322	2.90118e-06		0.678322	3.15226e-06		0.678322	3.00495e-06		0.678322	8.94745e-07		0.678322	9.74779e-07		0.678322	1.22155e-06
0.681215	2.77153e-06		0.681215	3.0259e-06		0.681215	3.02714e-06		0.681215	8.99196e-07		0.681215	9.7664e-07		0.681215	1.22304e-06
0.684109	2.64672e-06		0.684109	2.9083e-06		0.684109	3.04883e-06		0.684109	9.03486e-07		0.684109	9.78389e-07		0.684109	1.22439e-06
0.687003	2.52129e-06		0.687003	2.79947e-06		0.687003	3.06991e-06		0.687003	9.07573e-07		0.687003	9.79997e-07		0.687003	1.22556e-06
0.689897	2.40396e-06		0.689897	2.6993e-06		0.689897	3.09023e-06		0.689897	9.11404e-07		0.689897	9.81423e-07		0.689897	1.22651e-06
0.692791	2.2953e-06		0.692791	2.60698e-06		0.692791	3.1096e-06		0.692791	9.14917e-07		0.692791	9.8262e-07		0.692791	1.2272e-06
0.695685	2.19314e-06		0.695685	2.52103e-06		0.695685	3.12784e-06		0.695685	9.18043e-07		0.695685	9.83525e-07		0.695685	1.22757e-06
0.698579	2.10486e-06		0.698579	2.44026e-06		0.698579	3.14469e-06		0.698579	9.20717e-07		0.698579	9.84052e-07		0.698579	1.22756e-06
0.701473	2.03517e-06		0.701473	2.3647e-06		0.701473	3.1599e-06		0.701473	9.22884e-07		0.701473	9.84349e-07		0.701473	1.2271e-06
0.704367	1.97479e-06		0.704367	2.29432e-06		0.704367	3.17311e-06		0.704367	9.24819e-07		0.704367	9.84604e-07		0.704367	1.22608e-06
0.70726	1.91289e-06		0.70726	2.22981e-06		0.70726	3.1839e-06		0.70726	9.26772e-07		0.70726	9.8477e-07		0.70726	1.22437e-06
0.710154	1.85442e-06		0.710154	2.16753e-06		0.710154	3.19166e-06		0.710154	9.28636e-07		0.710154	9.84763e-07		0.710154	1.22221e-06
0.713048	1.80068e-06		0.713048	2.10895e-06		0.713048	3.19749e-06		0.713048	9.30247e-07		0.713048	9.8445e-07		0.713048	1.21991e-06
0.715942	1.75185e-06		0.715942	2.06534e-06		0.715942	3.20242e-06		0.715942	9.31329e-07		0.715942	9.83593e-07		0.715942	1.2173e-06
0.715942	1.75185e-06		0.715942	2.06534e-06		0.715942	3.20242e-06		0.715942	9.31329e-07		0.715942	9.83593e-07		0.715942	1.2173e-06
0.718836	1.70729e-06		0.718836	2.03543e-06		0.718836	3.20718e-06		0.718836	9.32113e-07		0.718836	9.82415e-07		0.718836	1.2145e-06
0.72173	1.66585e-06		0.72173	2.0075e-06		0.72173	3.21269e-06		0.72173	9.32951e-07		0.72173	9.81251e-07		0.72173	1.21171e-06
0.724624	1.62703e-06		0.724624	1.98036e-06		0.724624	3.21867e-06		0.724624	9.33771e-07		0.724624	9.8005e-07		0.724624	1.20887e-06
0.727518	1.5912e-06		0.727518	1.95563e-06		0.727518	3.2251e-06		0.727518	9.34563e-07		0.727518	9.78807e-07		0.727518	1.20598e-06
0.730412	1.55826e-06		0.730412	1.93138e-06		0.730412	3.23191e-06		0.730412	9.35313e-07		0.730412	9.77517e-07		0.730412	1.20302e-06
0.733305	1.52792e-06		0.733305	1.90842e-06		0.733305	3.23904e-06		0.733305	9.36008e-07		0.733305	9.76167e-07		0.733305	1.19997e-06
0.736199	1.50016e-06		0.736199	1.8872e-06		0.736199	3.24636e-06		0.736199	9.36637e-07		0.736199	9.74744e-07		0.736199	1.19682e-06
0.739093	1.47471e-06		0.739093	1.86797e-06		0.739093	3.25372e-06		0.739093	9.37186e-07		0.739093	9.7323e-07		0.739093	1.19351e-06
0.741987	1.45127e-06		0.741987	1.85067e-06		0.741987	3.26097e-06		0.741987	9.37635e-07		0.741987	9.71606e-07		0.741987	1.19003e-06
0.744881	1.42988e-06		0.744881	1.8351e-06		0.744881	3.26792e-06		0.744881	9.37961e-07		0.744881	9.6985e-07		0.744881	1.18635e-06
0.747775	1.41058e-06		0.747775	1.82129e-06		0.747775	3.27433e-06		0.747775	9.38136e-07		0.747775	9.67942e-07		0.747775	1.18241e-06
0.750669	1.39333e-06		0.750669	1.80907e-06		0.750669	3.28028e-06		0.750669	9.38132e-07		0.750669	9.65858e-07		0.750669	1.17819e-06
0.753563	1.37779e-06		0.753563	1.79819e-06		0.753563	3.28595e-06		0.753563	9.37919e-07		0.753563	9.63571e-07		0.753563	1.17365e-06
0.756457	1.36375e-06		0.756457	1.78857e-06		0.756457	3.29112e-06		0.756457	9.37466e-07		0.756457	9.60967e-07		0.756457	1.16873e-06
0.75935	1.35123e-06		0.75935	1.78017e-06		0.75935	3.29546e-06		0.75935	9.36746e-07		0.75935	9.57931e-07		0.75935	1.1634e-06
0.762244	1.34025e-06		0.762244	1.77295e-06		0.762244	3.29863e-06		0.762244	9.35737e-07		0.762244	9.54432e-07		0.762244	1.1576e-06
0.765138	1.33083e-06		0.765138	1.76687e-06		0.765138	3.30028e-06		0.765138	9.343e-07		0.765138	9.50443e-07		0.765138	1.15128e-06
0.768032	1.32296e-06		0.768032	1.76188e-06		0.768032	3.30009e-06		0.768032	9.32268e-07		0.768032	9.4594e-07		0.768032	1.1444e-06
0.770926	1.31663e-06		0.770926	1.75788e-06		0.770926	3.29776e-06		0.770926	9.29568e-07		0.770926	9.40901e-07		0.770926	1.13693e-06
0.77382	1.31172e-06		0.77382	1.75472e-06		0.77382	3.29299e-06		0.77382	9.26129e-07		0.77382	9.35303e-07		0.77382	1.12884e-06
0.776714	1.30801e-06		0.776714	1.75222e-06		0.776714	3.28543e-06		0.776714	9.2188e-07		0.776714	9.29106e-07		0.776714	1.12011e-06
0.779608	1.30526e-06		0.779608	1.75016e-06		0.779608	3.27484e-06		0.779608	9.16777e-07		0.779608	9.22263e-07		0.779608	1.11073e-06
0.782502	1.30338e-06		0.782502	1.74836e-06		0.782502	3.26124e-06		0.782502	9.10814e-07		0.782502	9.14732e-07		0.782502	1.10068e-06
0.785396	1.30223e-06		0.785396	1.74661e-06		0.785396	3.24445e-06		0.785396	9.03991e-07		0.785396	9.06493e-07		0.785396	1.08996e-06
0.788289	1.30165e-06		0.788289	1.74467e-06		0.788289	3.22419e-06		0.788289	8.96276e-07		0.788289	8.97552e-07		0.788289	1.07857e-06
0.791183	1.30141e-06		0.791183	1.74219e-06		0.791183	3.2003e-06		0.791183	8.87605e-07		0.791183	8.87932e-07		0.791183	1.06631e-06
0.794077	1.30126e-06		0.794077	1.73882e-06		0.794077	3.17256e-06		0.794077	8.77916e-07		0.794077	8.77445e-07		0.794077	1.05299e-06
0.796971	1.30095e-06		0.796971	1.73415e-06		0.796971	3.14035e-06		0.796971	8.67156e-07		0.796971	8.6586e-07		0.796971	1.03862e-06
0.799865	1.30018e-06		0.799865	1.72775e-06		0.799865	3.10251e-06		0.799865	8.55253e-07		0.799865	8.53133e-07		0.799865	1.02318e-06
0.799865	1.30018e-06		0.799865	1.72775e-06		0.799865	3.10251e-06		0.799865	8.55253e-07		0.799865	8.53133e-07		0.799865	1.02318e-06
0.802759	1.29829e-06		0.802759	1.71911e-06		0.802759	3.05773e-06		0.802759	8.42114e-07		0.802759	8.39261e-07		0.802759	1.00666e-06
0.805653	1.29477e-06		0.805653	1.70789e-06		0.805653	3.00673e-06		0.805653	8.27735e-07		0.805653	8.24303e-07		0.805653	9.89061e-07
0.808547	1.28945e-06		0.808547	1.69392e-06		0.808547	2.95225e-06		0.808547	8.11979e-07		0.808547	8.08326e-07		0.808547	9.70479e-07
0.811441	1.28209e-06		0.811441	1.67703e-06		0.811441	2.89575e-06		0.811441	7.94694e-07		0.811441	7.91385e-07		0.811441	9.50957e-07
0.814334	1.2725e-06		0.814334	1.65697e-06		0.814334	2.83672e-06		0.814334	7.75991e-07		0.814334	7.73553e-07		0.814334	9.30385e-07
0.817228	1.26063e-06		0.817228	1.63359e-06		0.817228	2.77298e-06		0.817228	7.56068e-07		0.817228	7.54946e-07		0.817228	9.08659e-07
0.820122	1.24648e-06		0.820122	1.60693e-06		0.820122	2.70001e-06		0.820122	7.35244e-07		0.820122	7.35448e-07		0.820122	8.85852e-07
0.823016	1.23002e-06		0.823016	1.57719e-06		0.823016	2.61651e-06		0.823016	7.13961e-07		0.823016	7.14911e-07		0.823016	8.62066e-07
0.82591	1.21123e-06		0.82591	1.54457e-06		0.82591	2.53262e-06		0.82591	6.92429e-07		0.82591	6.93423e-07		0.82591	8.37429e-07
0.828804	1.19021e-06		0.828804	1.50925e-06		0.828804	2.45879e-06		0.828804	6.70477e-07		0.828804	6.71121e-07		0.828804	8.12116e-07
0.831698	1.16704e-06		0.831698	1.47145e-06		0.831698	2.38605e-06		0.831698	6.47935e-07		0.831698	6.48177e-07		0.831698	7.86065e-07
0.834592	1.14185e-06		0.834592	1.43145e-06		0.834592	2.30241e-06		0.834592	6.24585e-07		0.834592	6.24797e-07		0.834592	7.59199e-07
0.837486	1.11481e-06		0.837486	1.38958e-06		0.837486	2.2004e-06		0.837486	6.00354e-07		0.837486	6.01218e-07		0.837486	7.31722e-07
0.840379	1.08613e-06		0.840379	1.34622e-06		0.840379	2.07366e-06		0.840379	5.75337e-07		0.840379	5.7739e-07		0.840379	7.03907e-07
0.843273	1.05604e-06		0.843273	1.30175e-06		0.843273	1.95025e-06		0.843273	5.49999e-07		0.843273	5.53294e-07		0.843273	6.76098e-07
0.846167	1.02477e-06		0.846167	1.25655e-06		0.846167	1.86585e-06		0.846167	5.25723e-07		0.846167	5.29266e-07		0.846167	6.48296e-07
0.849061	9.92547e-07		0.849061	1.21099e-06		0.849061	1.81331e-06		0.849061	5.04258e-07		0.849061	5.05561e-07		0.849061	6.20467e-07
0.851955	9.59625e-07		0.851955	1.16541e-06		0.851955	1.76706e-06		0.851955	4.8595e-07		0.851955	4.82348e-07		0.851955	5.92985e-07
0.854849	9.26309e-07		0.854849	1.12008e-06		0.854849	1.70754e-06		0.854849	4.68417e-07		0.854849	4.59817e-07		0.854849	5.66254e-07
0.857743	8.92857e-07		0.857743	1.07525e-06		0.857743	1.62726e-06		0.857743	4.48204e-07		0.857743	4.38143e-07		0.857743	5.40552e-07
0.860637	8.5952e-07		0.860637	1.03115e-06		0.860637	1.53772e-06		0.860637	4.25134e-07		0.860637	4.174e-07		0.860637	5.16069e-07
0.863531	8.26588e-07		0.863531	9.88037e-07		0.863531	1.45395e-06		0.863531	4.02094e-07		0.863531	3.97614e-07		0.863531	4.9303e-07
0.866424	7.94493e-07		0.866424	9.46372e-07		0.866424	1.38117e-06		0.866424	3.81271e-07		0.866424	3.78943e-07		0.866424	4.71719e-07
0.869318	7.64059e-07		0.869318	9.07147e-07		0.869318	1.31938e-06		0.869318	3.64582e-07		0.869318	3.62199e-07		0.869318	4.52513e-07
0.872212	7.37242e-07		0.872212	8.72706e-07		0.872212	1.26778e-06		0.872212	3.48163e-07		0.872212	3.48296e-07		0.872212	4.35912e-07
0.875106	7.20303e-07		0.875106	8.48762e-07		0.875106	1.22675e-06		0.875106	3.28699e-07		0.875106	3.39333e-07		0.875106	4.22837e-07
0.878	7.15555e-07		0.878	8.40465e-07		0.878	1.20918e-06		0.878	3.18701e-07		0.878	3.36597e-07		0.878	4.17403e-07

## Sheet: Radiation heat flux
SN 0			SN 0.2			SN 0.4			SN 0.6			SN 0.8			SN 1
Axial distance	Radiation heat flux W/m2		Axial distance	Radiation heat flux W/m2		Axial distance	Radiation heat flux W/m2		Axial distance	Radiation heat flux W/m2		Axial distance	Radiation heat flux W/m2		Axial distance	Radiation heat flux W/m2
0.00115113	9310.57		0.00115113	9697.05		0.00115113	18101.5		0.00115113	23843.5		0.00115113	28661.3		0.00115113	33954.4
0.00404502	9364.4		0.00404502	9759.31		0.00404502	18257		0.00404502	23886.4		0.00404502	29004.7		0.00404502	34227.8
0.00693891	9420.27		0.00693891	9825.91		0.00693891	18424.1		0.00693891	23950.9		0.00693891	29317.3		0.00693891	34435.3
0.0098328	9493.72		0.0098328	9907.36		0.0098328	18626.2		0.0098328	24073.9		0.0098328	29613.9		0.0098328	34617.7
0.0127267	9592.02		0.0127267	10009.3		0.0127267	18876.8		0.0127267	24289.8		0.0127267	29907.8		0.0127267	34778.3
0.0156206	9711.02		0.0156206	10128		0.0156206	19165.1		0.0156206	24594.5		0.0156206	30190.6		0.0156206	34947.6
0.0185145	9838.71		0.0185145	10252.8		0.0185145	19481.9		0.0185145	24968.4		0.0185145	30473		0.0185145	35212.6
0.0214084	9968.91		0.0214084	10376.6		0.0214084	19823.8		0.0214084	25400.2		0.0214084	30768.1		0.0214084	35612.7
0.0243023	10097.2		0.0243023	10493		0.0243023	20177.9		0.0243023	25864.6		0.0243023	31043.3		0.0243023	36141.8
0.0271961	10215.1		0.0271961	10599.2		0.0271961	20528.3		0.0271961	26328.9		0.0271961	31292.6		0.0271961	36768.2
0.03009	10320.6		0.03009	10695.2		0.03009	20861.6		0.03009	26762.7		0.03009	31568.7		0.03009	37437.9
0.0329839	10414.5		0.0329839	10783.3		0.0329839	21170.8		0.0329839	27139.5		0.0329839	31913		0.0329839	38086.5
0.0358778	10499.3		0.0358778	10865.4		0.0358778	21453.2		0.0358778	27444.4		0.0358778	32339.4		0.0358778	38655.6
0.0387717	10577.1		0.0387717	10944.3		0.0387717	21707.3		0.0387717	27680.4		0.0387717	32831.5		0.0387717	39113.9
0.0416656	10649.1		0.0416656	11023.3		0.0416656	21932.6		0.0416656	27869.7		0.0416656	33346.5		0.0416656	39468
0.0445595	10716.2		0.0445595	11104.4		0.0445595	22130.6		0.0445595	28032.2		0.0445595	33828.1		0.0445595	39752.8
0.0474534	10779.6		0.0474534	11187.5		0.0474534	22306.6		0.0474534	28184.8		0.0474534	34231.1		0.0474534	39930.7
0.0503473	10840.5		0.0503473	11271.2		0.0503473	22463.7		0.0503473	28381.1		0.0503473	34546.4		0.0503473	40007.9
0.0532412	10900.6		0.0532412	11354.4		0.0532412	22601.1		0.0532412	28672.5		0.0532412	34804.9		0.0532412	40102.7
0.056135	10962.2		0.056135	11437.1		0.056135	22723.8		0.056135	29063.5		0.056135	34997.6		0.056135	40258.9
0.0590289	11027.1		0.0590289	11519.4		0.0590289	22842.5		0.0590289	29528.3		0.0590289	35132.1		0.0590289	40465
0.0619228	11095.8		0.0619228	11601.2		0.0619228	22966.8		0.0619228	30016.7		0.0619228	35315.9		0.0619228	40712.6
0.0648167	11168.3		0.0648167	11682.2		0.0648167	23106.1		0.0648167	30478		0.0648167	35598.8		0.0648167	40917.9
0.0677106	11244.8		0.0677106	11762.3		0.0677106	23270.6		0.0677106	30897		0.0677106	35955.5		0.0677106	41038.5
0.0706045	11324.7		0.0706045	11841.8		0.0706045	23468.2		0.0706045	31311.6		0.0706045	36336.9		0.0706045	41159
0.0734984	11406.5		0.0734984	11921.4		0.0734984	23704		0.0734984	31783.8		0.0734984	36670.9		0.0734984	41329.1
0.0763923	11490.1		0.0763923	12001.4		0.0763923	23978.1		0.0763923	32298.8		0.0763923	36988.2		0.0763923	41550.5
0.0792862	11575.7		0.0792862	12082		0.0792862	24284.1		0.0792862	32887.8		0.0792862	37354.9		0.0792862	41827.4
0.0821801	11664.1		0.0821801	12163.3		0.0821801	24611.8		0.0821801	33453		0.0821801	37712.5		0.0821801	42169
0.085074	11755.4		0.085074	12245.3		0.085074	24950.2		0.085074	33706.9		0.085074	37976.4		0.085074	42596.3
0.085074	11755.4		0.085074	12245.3		0.085074	24950.2		0.085074	33706.9		0.085074	37976.4		0.085074	42596.3
0.0879678	11848.5		0.0879678	12327.9		0.0879678	25289.8		0.0879678	33705.8		0.0879678	38128.5		0.0879678	43117.1
0.0908617	11942.3		0.0908617	12411.5		0.0908617	25627.7		0.0908617	33632.4		0.0908617	38196.9		0.0908617	43670.6
0.0937556	12035.7		0.0937556	12496.4		0.0937556	25977.6		0.0937556	33507.3		0.0937556	38190.1		0.0937556	44131
0.0966495	12128		0.0966495	12582.9		0.0966495	26374.5		0.0966495	33356.3		0.0966495	38113.1		0.0966495	44426.8
0.0995434	12218.5		0.0995434	12671.1		0.0995434	26863		0.0995434	33206.2		0.0995434	38031.9		0.0995434	44573.3
0.102437	12306.9		0.102437	12761.3		0.102437	27460.5		0.102437	33055.2		0.102437	37991.6		0.102437	44581.8
0.105331	12393.2		0.105331	12853.3		0.105331	28126.6		0.105331	32894.8		0.105331	37977.3		0.105331	44509.5
0.108225	12477.2		0.108225	12946.7		0.108225	28848.6		0.108225	32755.1		0.108225	37970.7		0.108225	44436.5
0.111119	12558.8		0.111119	13040.8		0.111119	29628.4		0.111119	32665.1		0.111119	37964.1		0.111119	44378.5
0.114013	12638.1		0.114013	13134.6		0.114013	30391.4		0.114013	32613.6		0.114013	37952.7		0.114013	44326.8
0.116907	12714.8		0.116907	13227.5		0.116907	31048.3		0.116907	32578.8		0.116907	37934		0.116907	44275.5
0.119801	12789.2		0.119801	13318.7		0.119801	31538.8		0.119801	32552.4		0.119801	37906.5		0.119801	44222.6
0.122695	12861.3		0.122695	13407.6		0.122695	31772.4		0.122695	32532.4		0.122695	37870.6		0.122695	44166.4
0.125588	12931.1		0.125588	13493.7		0.125588	31811.8		0.125588	32515.7		0.125588	37824.3		0.125588	44107.3
0.128482	12998.8		0.128482	13576.9		0.128482	31735.5		0.128482	32501		0.128482	37771.1		0.128482	44042
0.131376	13064.3		0.131376	13657.5		0.131376	31550.7		0.131376	32484.6		0.131376	37714.6		0.131376	43970.7
0.13427	13127.8		0.13427	13735.4		0.13427	31333.1		0.13427	32460.9		0.13427	37655.8		0.13427	43896.1
0.137164	13189.2		0.137164	13810.9		0.137164	31094.3		0.137164	32430.1		0.137164	37600		0.137164	43817.7
0.140058	13248.6		0.140058	13884.2		0.140058	30834.3		0.140058	32389.7		0.140058	37547.6		0.140058	43741.1
0.142952	13306.2		0.142952	13955.4		0.142952	30560		0.142952	32339.7		0.142952	37498.5		0.142952	43669.5
0.145846	13362		0.145846	14024.9		0.145846	30268.1		0.145846	32285.2		0.145846	37451.4		0.145846	43600.6
0.14874	13416		0.14874	14093		0.14874	29965.5		0.14874	32226.3		0.14874	37403.7		0.14874	43531
0.151633	13468.3		0.151633	14159.8		0.151633	29678.5		0.151633	32164.5		0.151633	37354.8		0.151633	43459.5
0.154527	13518.9		0.154527	14225.7		0.154527	29422.8		0.154527	32101		0.154527	37305.5		0.154527	43386
0.157421	13568		0.157421	14290.8		0.157421	29199.9		0.157421	32038.1		0.157421	37256.1		0.157421	43310.8
0.160315	13615.7		0.160315	14355.5		0.160315	29010.2		0.160315	31979.9		0.160315	37207.1		0.160315	43234.1
0.163209	13662		0.163209	14420.2		0.163209	28851.1		0.163209	31926		0.163209	37159		0.163209	43156.4
0.166103	13707.1		0.166103	14485.4		0.166103	28714.7		0.166103	31876		0.166103	37111.9		0.166103	43078.3
0.166103	13707.1		0.166103	14485.4		0.166103	28714.7		0.166103	31876		0.166103	37111.9		0.166103	43078.3
0.168997	13751.5		0.168997	14551.3		0.168997	28591.5		0.168997	31831.1		0.168997	37066.1		0.168997	42999.8
0.171891	13795.2		0.171891	14618.4		0.171891	28480		0.171891	31790.8		0.171891	37021.5		0.171891	42921.4
0.174785	13838.6		0.174785	14687		0.174785	28381		0.174785	31755.1		0.174785	36978.2		0.174785	42843.3
0.177678	13881.7		0.177678	14757		0.177678	28293.4		0.177678	31723.6		0.177678	36936.1		0.177678	42765.7
0.180572	13924.8		0.180572	14828.7		0.180572	28217.4		0.180572	31695.8		0.180572	36895		0.180572	42688.7
0.183466	13968		0.183466	14902		0.183466	28151.5		0.183466	31671.5		0.183466	36854.6		0.183466	42612.5
0.18636	14011.5		0.18636	14977.1		0.18636	28093		0.18636	31650.1		0.18636	36814.7		0.18636	42536.8
0.189254	14055.2		0.189254	15054		0.189254	28038.9		0.189254	31631		0.189254	36774.9		0.189254	42461.9
0.192148	14099.5		0.192148	15132.6		0.192148	27987		0.192148	31614		0.192148	36735.1		0.192148	42387.9
0.195042	14144.6		0.195042	15212.8		0.195042	27935.4		0.195042	31599		0.195042	36695.3		0.195042	42315.5
0.197936	14190.6		0.197936	15294.6		0.197936	27883.1		0.197936	31585.4		0.197936	36655.8		0.197936	42244.1
0.20083	14237.7		0.20083	15378		0.20083	27829.1		0.20083	31572.5		0.20083	36616		0.20083	42172.4
0.203723	14286.1		0.203723	15462.8		0.203723	27773.4		0.203723	31559.7		0.203723	36574.5		0.203723	42099.6
0.206617	14335.9		0.206617	15549.3		0.206617	27716.1		0.206617	31546.9		0.206617	36530.8		0.206617	42026.4
0.209511	14387.2		0.209511	15637.5		0.209511	27658.6		0.209511	31533.5		0.209511	36485.2		0.209511	41953.1
0.212405	14439.9		0.212405	15727.3		0.212405	27602.9		0.212405	31518.6		0.212405	36438.8		0.212405	41879.8
0.215299	14494.4		0.215299	15818.8		0.215299	27549.5		0.215299	31500.7		0.215299	36392.2		0.215299	41806.6
0.215299	14494.4		0.215299	15818.8		0.215299	27549.5		0.215299	31500.7		0.215299	36392.2		0.215299	41806.6
0.218193	14550.7		0.218193	15911.7		0.218193	27499.4		0.218193	31479.6		0.218193	36345.7		0.218193	41734.2
0.221087	14608.9		0.221087	16006.3		0.221087	27455.3		0.221087	31455.8		0.221087	36299		0.221087	41662.2
0.223981	14669		0.223981	16102.7		0.223981	27418.2		0.223981	31430		0.223981	36251.4		0.223981	41590.1
0.226875	14731.3		0.226875	16201.2		0.226875	27388.6		0.226875	31402.4		0.226875	36201.9		0.226875	41517.4
0.229768	14795.5		0.229768	16301.4		0.229768	27366.6		0.229768	31373.3		0.229768	36150.3		0.229768	41443.6
0.232662	14862		0.232662	16403.4		0.232662	27351.9		0.232662	31342.8		0.232662	36097.5		0.232662	41368.7
0.235556	14930.7		0.235556	16507.5		0.235556	27343.3		0.235556	31311.1		0.235556	36043.8		0.235556	41292.9
0.23845	15001.8		0.23845	16613.5		0.23845	27339.5		0.23845	31278.2		0.23845	35989.1		0.23845	41215.9
0.241344	15075.2		0.241344	16721.5		0.241344	27339.3		0.241344	31244		0.241344	35933.3		0.241344	41137.8
0.244238	15150.9		0.244238	16831.6		0.244238	27341.2		0.244238	31208.3		0.244238	35876.5		0.244238	41058.6
0.247132	15229		0.247132	16944.1		0.247132	27344.4		0.247132	31171.3		0.247132	35818.6		0.247132	40978.2
0.250026	15309.3		0.250026	17058.8		0.250026	27347.8		0.250026	31132.9		0.250026	35759.8		0.250026	40896.7
0.25292	15391.9		0.25292	17176		0.25292	27350.2		0.25292	31092.9		0.25292	35700.1		0.25292	40814
0.255814	15476.7		0.255814	17295.5		0.255814	27350.9		0.255814	31051.5		0.255814	35639.5		0.255814	40730.2
0.258707	15563.5		0.258707	17417.5		0.258707	27349.6		0.258707	31009.4		0.258707	35578.1		0.258707	40645.3
0.261601	15652.5		0.261601	17542.1		0.261601	27346.1		0.261601	30966.4		0.261601	35515.8		0.261601	40559.3
0.264495	15743.6		0.264495	17669.3		0.264495	27340.2		0.264495	30922.5		0.264495	35452.7		0.264495	40472.1
0.267389	15836.6		0.267389	17799.3		0.267389	27331.3		0.267389	30877.6		0.267389	35388.7		0.267389	40383.8
0.270283	15931.6		0.270283	17932.1		0.270283	27319.2		0.270283	30831.8		0.270283	35323.8		0.270283	40294.4
0.273177	16028.6		0.273177	18067.8		0.273177	27303.3		0.273177	30785.2		0.273177	35257.9		0.273177	40203.7
0.276071	16127.6		0.276071	18206.3		0.276071	27283.8		0.276071	30737.7		0.276071	35190.9		0.276071	40111.8
0.278965	16228.4		0.278965	18347.9		0.278965	27260.6		0.278965	30689.5		0.278965	35123		0.278965	40018.6
0.281859	16331		0.281859	18492.6		0.281859	27234.2		0.281859	30640.6		0.281859	35053.9		0.281859	39924
0.284752	16435.4		0.284752	18640.3		0.284752	27204.9		0.284752	30591.2		0.284752	34983.8		0.284752	39827.9
0.287646	16541.7		0.287646	18791.2		0.287646	27173.5		0.287646	30541.2		0.287646	34912.6		0.287646	39730.4
0.29054	16649.7		0.29054	18945.3		0.29054	27140.2		0.29054	30490.6		0.29054	34840.2		0.29054	39631.2
0.293434	16759.5		0.293434	19102.7		0.293434	27105.3		0.293434	30439.3		0.293434	34766.7		0.293434	39530.4
0.296328	16871.2		0.296328	19263.4		0.296328	27069		0.296328	30387.3		0.296328	34692		0.296328	39428
0.299222	16984.6		0.299222	19427.4		0.299222	27031.5		0.299222	30334.6		0.299222	34616		0.299222	39323.9
0.302116	17099.9		0.302116	19594.7		0.302116	26992.8		0.302116	30281.1		0.302116	34538.8		0.302116	39218
0.30501	17217		0.30501	19765.3		0.30501	26953.1		0.30501	30226.9		0.30501	34460.4		0.30501	39110.5
0.307904	17335.9		0.307904	19939.3		0.307904	26912.5		0.307904	30171.9		0.307904	34380.8		0.307904	39001.3
0.310797	17456.9		0.310797	20116.5		0.310797	26870.9		0.310797	30116.1		0.310797	34299.8		0.310797	38890.5
0.313691	17579.9		0.313691	20296.8		0.313691	26828.3		0.313691	30059.2		0.313691	34217.5		0.313691	38778.1
0.313691	17579.9		0.313691	20296.8		0.313691	26828.3		0.313691	30059.2		0.313691	34217.5		0.313691	38778.1
0.316585	17705		0.316585	20480.3		0.316585	26784.9		0.316585	30001.2		0.316585	34133.6		0.316585	38664
0.319479	17832.3		0.319479	20667		0.319479	26741.1		0.319479	29942.2		0.319479	34048.5		0.319479	38548.4
0.322373	17961.8		0.322373	20857		0.322373	26696.9		0.322373	29882.1		0.322373	33962		0.322373	38431.7
0.325267	18093.7		0.325267	21050.2		0.325267	26652.2		0.325267	29821.1		0.325267	33874.5		0.325267	38313.8
0.328161	18227.8		0.328161	21246.8		0.328161	26607.1		0.328161	29758.9		0.328161	33785.7		0.328161	38194.7
0.331055	18364.4		0.331055	21446.7		0.331055	26561.5		0.331055	29695.6		0.331055	33695.9		0.331055	38074.3
0.333949	18503.6		0.333949	21649.8		0.333949	26515.5		0.333949	29631.1		0.333949	33604.9		0.333949	37953.1
0.336842	18645.3		0.336842	21856.1		0.336842	26469.1		0.336842	29565.5		0.336842	33513		0.336842	37831.4
0.339736	18789.8		0.339736	22065.5		0.339736	26422.5		0.339736	29498.8		0.339736	33420.3		0.339736	37709.3
0.34263	18937.1		0.34263	22277.9		0.34263	26375.6		0.34263	29431.1		0.34263	33326.8		0.34263	37586.7
0.345524	19087.1		0.345524	22493.1		0.345524	26328.4		0.345524	29362.3		0.345524	33232.5		0.345524	37463.6
0.348418	19240		0.348418	22711.3		0.348418	26281.1		0.348418	29292.6		0.348418	33137.4		0.348418	37340.2
0.351312	19395.9		0.351312	22932.5		0.351312	26233.4		0.351312	29222		0.351312	33041.8		0.351312	37216.6
0.354206	19554.7		0.354206	23156.7		0.354206	26185.5		0.354206	29150.5		0.354206	32945.9		0.354206	37092.9
0.3571	19716.7		0.3571	23383.9		0.3571	26137.2		0.3571	29078.3		0.3571	32849.5		0.3571	36969.3
0.359994	19881.7		0.359994	23613.6		0.359994	26088.6		0.359994	29005.4		0.359994	32752.8		0.359994	36845.7
0.362887	20049.5		0.362887	23845.4		0.362887	26039.7		0.362887	28931.9		0.362887	32655.8		0.362887	36722.3
0.365781	20219.9		0.365781	24078.6		0.365781	25990.3		0.365781	28857.9		0.365781	32558.8		0.365781	36599.3
0.368675	20393.2		0.368675	24313.2		0.368675	25940.5		0.368675	28783.5		0.368675	32461.7		0.368675	36476.6
0.371569	20569.3		0.371569	24549		0.371569	25890		0.371569	28708.6		0.371569	32364.5		0.371569	36354.1
0.374463	20748.3		0.374463	24785.1		0.374463	25838.9		0.374463	28632.9		0.374463	32267.3		0.374463	36231.7
0.377357	20930.3		0.377357	25020.8		0.377357	25787		0.377357	28557		0.377357	32170.1		0.377357	36109.6
0.380251	21115		0.380251	25255.6		0.380251	25734.6		0.380251	28481		0.380251	32073.2		0.380251	35987.9
0.383145	21302.3		0.383145	25488.9		0.383145	25681.5		0.383145	28404.7		0.383145	31976.5		0.383145	35866.7
0.386039	21492.1		0.386039	25719.8		0.386039	25627.6		0.386039	28328.2		0.386039	31880.1		0.386039	35745.8
0.388932	21684.2		0.388932	25946.7		0.388932	25573.1		0.388932	28251.6		0.388932	31784		0.388932	35625.2
0.391826	21878.3		0.391826	26168.9		0.391826	25517.7		0.391826	28174.8		0.391826	31688.1		0.391826	35505
0.39472	22074		0.39472	26384.9		0.39472	25461.6		0.39472	28098.1		0.39472	31592.5		0.39472	35385.1
0.397614	22271.1		0.397614	26593.3		0.397614	25404.7		0.397614	28021.3		0.397614	31497.2		0.397614	35265.5
0.400508	22469		0.400508	26792.7		0.400508	25347.1		0.400508	27944.6		0.400508	31402.1		0.400508	35146.2
0.403402	22666.9		0.403402	26980.7		0.403402	25288.8		0.403402	27867.9		0.403402	31307.3		0.403402	35027.2
0.403402	22666.9		0.403402	26980.7		0.403402	25288.8		0.403402	27867.9		0.403402	31307.3		0.403402	35027.2
0.406296	22863.9		0.406296	27155.5		0.406296	25229.8		0.406296	27791.4		0.406296	31212.8		0.406296	34908.5
0.40919	23059.4		0.40919	27315		0.40919	25170.1		0.40919	27715.1		0.40919	31118.5		0.40919	34790.2
0.412084	23252.4		0.412084	27456.2		0.412084	25109.9		0.412084	27638.9		0.412084	31024.5		0.412084	34672.1
0.414977	23441.9		0.414977	27576.4		0.414977	25049.3		0.414977	27562.9		0.414977	30930.8		0.414977	34554.4
0.417871	23626.3		0.417871	27672.8		0.417871	24988.1		0.417871	27487		0.417871	30837.3		0.417871	34437
0.420765	23804		0.420765	27740.6		0.420765	24926.6		0.420765	27411.3		0.420765	30744		0.420765	34319.9
0.423659	23972.7		0.423659	27783.6		0.423659	24864.7		0.423659	27335.8		0.423659	30650.9		0.423659	34203.2
0.426553	24130.7		0.426553	27800.4		0.426553	24802.5		0.426553	27260.6		0.426553	30558.1		0.426553	34086.8
0.429447	24275.9		0.429447	27788.7		0.429447	24740		0.429447	27185.5		0.429447	30465.5		0.429447	33970.9
0.432341	24404.7		0.432341	27758.3		0.432341	24677.1		0.432341	27110.6		0.432341	30373		0.432341	33855.3
0.435235	24514.7		0.435235	27710.4		0.435235	24614.1		0.435235	27035.9		0.435235	30280.8		0.435235	33740.2
0.438129	24601.2		0.438129	27642.8		0.438129	24551		0.438129	26961.4		0.438129	30188.8		0.438129	33625.5
0.441023	24665.9		0.441023	27557.9		0.441023	24487.6		0.441023	26887.1		0.441023	30096.9		0.441023	33511.2
0.443916	24707.9		0.443916	27458.8		0.443916	24424.1		0.443916	26813		0.443916	30005.3		0.443916	33397.5
0.44681	24728.3		0.44681	27344.7		0.44681	24360.5		0.44681	26739.1		0.44681	29914		0.44681	33284.4
0.449704	24730.6		0.449704	27218.9		0.449704	24296.8		0.449704	26665.5		0.449704	29823		0.449704	33171.8
0.452598	24712		0.452598	27085.1		0.452598	24233.2		0.452598	26592.2		0.452598	29732.3		0.452598	33059.9
0.455492	24680.7		0.455492	26939.4		0.455492	24169.7		0.455492	26519.1		0.455492	29642		0.455492	32948.7
0.458386	24637.7		0.458386	26789.2		0.458386	24106.2		0.458386	26446.1		0.458386	29552		0.458386	32838
0.46128	24581		0.46128	26633.5		0.46128	24042.7		0.46128	26373.3		0.46128	29462.3		0.46128	32727.9
0.464174	24512.2		0.464174	26474.6		0.464174	23979.3		0.464174	26300.7		0.464174	29372.9		0.464174	32618.4
0.467068	24432.3		0.467068	26313		0.467068	23916.1		0.467068	26228.4		0.467068	29284.1		0.467068	32509.6
0.469961	24343.7		0.469961	26150.1		0.469961	23853.2		0.469961	26156.5		0.469961	29195.8		0.469961	32401.6
0.472855	24248.2		0.472855	25988.1		0.472855	23790.4		0.472855	26084.8		0.472855	29108		0.472855	32294.4
0.475749	24145.3		0.475749	25825.9		0.475749	23727.8		0.475749	26013.4		0.475749	29020.7		0.475749	32187.9
0.478643	24039.4		0.478643	25667.8		0.478643	23665.4		0.478643	25942.3		0.478643	28933.9		0.478643	32082.1
0.481537	23930.5		0.481537	25510.6		0.481537	23603.2		0.481537	25871.5		0.481537	28847.6		0.481537	31977
0.484431	23818.5		0.484431	25357.1		0.484431	23541.2		0.484431	25801		0.484431	28761.8		0.484431	31872.7
0.487325	23707.9		0.487325	25207.6		0.487325	23479.5		0.487325	25730.8		0.487325	28676.7		0.487325	31769.1
0.490219	23595.9		0.490219	25060.5		0.490219	23417.9		0.490219	25661		0.490219	28592.1		0.490219	31666.4
0.493113	23484.7		0.493113	24920.1		0.493113	23356.6		0.493113	25591.6		0.493113	28508.2		0.493113	31564.5
0.496006	23375.5		0.496006	24782.3		0.496006	23295.5		0.496006	25522.5		0.496006	28424.8		0.496006	31463.2
0.4989	23266.8		0.4989	24650.1		0.4989	23234.6		0.4989	25453.8		0.4989	28341.9		0.4989	31362.7
0.501794	23160.6		0.501794	24523.5		0.501794	23174		0.501794	25385.5		0.501794	28259.7		0.501794	31262.9
0.504688	23059.4		0.504688	24399.5		0.504688	23113.5		0.504688	25317.6		0.504688	28177.9		0.504688	31163.7
0.507582	22958.5		0.507582	24283.3		0.507582	23053.3		0.507582	25250.1		0.507582	28096.8		0.507582	31065.3
0.510476	22862.1		0.510476	24169.3		0.510476	22993.4		0.510476	25183		0.510476	28016.3		0.510476	30967.6
0.51337	22771.3		0.51337	24061		0.51337	22933.6		0.51337	25116.4		0.51337	27936.4		0.51337	30870.6
0.516264	22681.4		0.516264	23959.3		0.516264	22874		0.516264	25050.1		0.516264	27857		0.516264	30774
0.519158	22596.3		0.519158	23859.5		0.519158	22814.5		0.519158	24984.1		0.519158	27777.8		0.519158	30677.8
0.522051	22515.5		0.522051	23766.8		0.522051	22755		0.522051	24918.5		0.522051	27699.1		0.522051	30582
0.524945	22436.8		0.524945	23678.3		0.524945	22695.8		0.524945	24853.2		0.524945	27620.9		0.524945	30486.8
0.524945	22436.8		0.524945	23678.3		0.524945	22695.8		0.524945	24853.2		0.524945	27620.9		0.524945	30486.8
0.527839	22362		0.527839	23592		0.527839	22636.7		0.527839	24788.3		0.527839	27543.1		0.527839	30392
0.530733	22290.9		0.530733	23512.2		0.530733	22577.8		0.530733	24723.7		0.530733	27465.6		0.530733	30297.5
0.533627	22222.5		0.533627	23434.6		0.533627	22519		0.533627	24659.5		0.533627	27388.5		0.533627	30203.4
0.536521	22157.7		0.536521	23360.8		0.536521	22460.3		0.536521	24595.5		0.536521	27311.6		0.536521	30109.6
0.539415	22096.1		0.539415	23290.9		0.539415	22401.8		0.539415	24531.7		0.539415	27235		0.539415	30016
0.542309	22037.8		0.542309	23224.1		0.542309	22343.4		0.542309	24468.2		0.542309	27158.6		0.542309	29922.7
0.545203	21982.7		0.545203	23160.2		0.545203	22285		0.545203	24404.9		0.545203	27082.4		0.545203	29829.6
0.548096	21930.5		0.548096	23099.4		0.548096	22226.8		0.548096	24341.8		0.548096	27006.4		0.548096	29736.7
0.55099	21881.2		0.55099	23041.4		0.55099	22168.6		0.55099	24278.8		0.55099	26930.5		0.55099	29644.1
0.553884	21834.8		0.553884	22986		0.553884	22110.6		0.553884	24216		0.553884	26854.7		0.553884	29551.6
0.556778	21790.9		0.556778	22933		0.556778	22052.5		0.556778	24153.3		0.556778	26779		0.556778	29459.2
0.559672	21749.7		0.559672	22882.2		0.559672	21994.6		0.559672	24090.6		0.559672	26703.3		0.559672	29367
0.562566	21711		0.562566	22833.7		0.562566	21936.6		0.562566	24028		0.562566	26627.7		0.562566	29274.9
0.56546	21674.6		0.56546	22787.1		0.56546	21878.7		0.56546	23965.5		0.56546	26552.2		0.56546	29182.9
0.568354	21640.3		0.568354	22742.5		0.568354	21820.8		0.568354	23903		0.568354	26476.6		0.568354	29091
0.571248	21607.7		0.571248	22699.5		0.571248	21763		0.571248	23840.6		0.571248	26401.1		0.571248	28999.2
0.574142	21576.8		0.574142	22658.3		0.574142	21705.2		0.574142	23778.1		0.574142	26325.6		0.574142	28907.5
0.577035	21547.5		0.577035	22618.6		0.577035	21647.4		0.577035	23715.7		0.577035	26250.1		0.577035	28815.9
0.579929	21519.8		0.579929	22580.1		0.579929	21589.7		0.579929	23653.2		0.579929	26174.5		0.579929	28724.3
0.582823	21493.3		0.582823	22543		0.582823	21532		0.582823	23590.7		0.582823	26098.9		0.582823	28632.8
0.585717	21468.1		0.585717	22506.9		0.585717	21474.3		0.585717	23528.1		0.585717	26023.4		0.585717	28541.4
0.588611	21444		0.588611	22472		0.588611	21416.7		0.588611	23465.5		0.588611	25947.7		0.588611	28450.1
0.591505	21421		0.591505	22437.9		0.591505	21359.2		0.591505	23403		0.591505	25872.2		0.591505	28358.8
0.594399	21399.1		0.594399	22404.7		0.594399	21301.8		0.594399	23340.5		0.594399	25796.6		0.594399	28267.7
0.597293	21378.3		0.597293	22372.5		0.597293	21244.6		0.597293	23278		0.597293	25721.2		0.597293	28176.8
0.600186	21358.5		0.600186	22340.9		0.600186	21187.5		0.600186	23215.7		0.600186	25645.9		0.600186	28085.9
0.60308	21339.5		0.60308	22310		0.60308	21130.7		0.60308	23153.3		0.60308	25570.5		0.60308	27995.2
0.605974	21321.3		0.605974	22279.7		0.605974	21073.9		0.605974	23091		0.605974	25495.3		0.605974	27904.5
0.608868	21303.8		0.608868	22250.2		0.608868	21017.5		0.608868	23028.9		0.608868	25420.1		0.608868	27814
0.611762	21287.2		0.611762	22221.3		0.611762	20961.4		0.611762	22967		0.611762	25345.2		0.611762	27723.8
0.614656	21271.6		0.614656	22193.4		0.614656	20905.8		0.614656	22905.4		0.614656	25270.7		0.614656	27633.9
0.61755	21257		0.61755	22166.4		0.61755	20850.6		0.61755	22844.2		0.61755	25196.4		0.61755	27544.3
0.620444	21243.3		0.620444	22140.2		0.620444	20795.9		0.620444	22783.2		0.620444	25122.4		0.620444	27455
0.623338	21230.6		0.623338	22115		0.623338	20741.7		0.623338	22722.7		0.623338	25048.8		0.623338	27366.1
0.626231	21218.9		0.626231	22090.9		0.626231	20688.1		0.626231	22662.6		0.626231	24975.6		0.626231	27277.7
0.629125	21208.3		0.629125	22068.1		0.629125	20635.2		0.629125	22603		0.629125	24902.9		0.629125	27189.7
0.632019	21198.7		0.632019	22046.3		0.632019	20583.2		0.632019	22544.1		0.632019	24830.9		0.632019	27102.3
0.634913	21190.3		0.634913	22025.8		0.634913	20532.1		0.634913	22486.1		0.634913	24759.6		0.634913	27015.6
0.637807	21183.4		0.637807	22006.6		0.637807	20482.2		0.637807	22429		0.637807	24689.2		0.637807	26929.9
0.640701	21178		0.640701	21988.9		0.640701	20433.5		0.640701	22373		0.640701	24619.9		0.640701	26845.2
0.643595	21174.5		0.643595	21972.9		0.643595	20386.3		0.643595	22318.4		0.643595	24551.9		0.643595	26761.7
0.643595	21174.5		0.643595	21972.9		0.643595	20386.3		0.643595	22318.4		0.643595	24551.9		0.643595	26761.7
0.646489	21172.8		0.646489	21958.9		0.646489	20340.7		0.646489	22265.2		0.646489	24485.3		0.646489	26679.7
0.649383	21173.2		0.649383	21947		0.649383	20296.8		0.649383	22213.6		0.649383	24420.4		0.649383	26599.2
0.652277	21175.7		0.652277	21937.4		0.652277	20254.8		0.652277	22163.8		0.652277	24357.2		0.652277	26520.5
0.65517	21180.4		0.65517	21930.2		0.65517	20214.6		0.65517	22115.8		0.65517	24295.9		0.65517	26443.6
0.658064	21187.4		0.658064	21925.4		0.658064	20176.6		0.658064	22069.8		0.658064	24236.5		0.658064	26368.7
0.660958	21196.4		0.660958	21922.7		0.660958	20140.3		0.660958	22025.6		0.660958	24179.2		0.660958	26295.6
0.663852	21207.6		0.663852	21922.5		0.663852	20105.9		0.663852	21983.3		0.663852	24123.7		0.663852	26224.7
0.666746	21220.9		0.666746	21924.3		0.666746	20073.3		0.666746	21942.9		0.666746	24070.2		0.666746	26155.6
0.66964	21236.6		0.66964	21928.6		0.66964	20042.4		0.66964	21904.3		0.66964	24018.8		0.66964	26088.9
0.672534	21254.1		0.672534	21935		0.672534	20013.2		0.672534	21867.5		0.672534	23969.4		0.672534	26024.2
0.675428	21273.4		0.675428	21943.2		0.675428	19985.9		0.675428	21832.4		0.675428	23921.8		0.675428	25961.5
0.678322	21294.5		0.678322	21953.4		0.678322	19962		0.678322	21799.3		0.678322	23876		0.678322	25901
0.681215	21316.9		0.681215	21965.1		0.681215	19939.3		0.681215	21769.9		0.681215	23832.3		0.681215	25842.4
0.684109	21341.1		0.684109	21978.8		0.684109	19919.3		0.684109	21741.7		0.684109	23792.6		0.684109	25786.4
0.687003	21368.8		0.687003	21996.2		0.687003	19901		0.687003	21716.4		0.687003	23754.4		0.687003	25735
0.689897	21397		0.689897	22014.4		0.689897	19884.8		0.689897	21692.8		0.689897	23719.5		0.689897	25685.4
0.692791	21427.3		0.692791	22035.1		0.692791	19870.4		0.692791	21671.7		0.692791	23686.4		0.692791	25639.8
0.695685	21458.4		0.695685	22056.6		0.695685	19858.1		0.695685	21652.3		0.695685	23656.3		0.695685	25596.5
0.698579	21491.2		0.698579	22080		0.698579	19847.3		0.698579	21635.3		0.698579	23628.2		0.698579	25557.1
0.701473	21524.6		0.701473	22104.2		0.701473	19838.5		0.701473	21619.9		0.701473	23602.9		0.701473	25520.1
0.704367	21559		0.704367	22129.7		0.704367	19830.9		0.704367	21606.5		0.704367	23579.5		0.704367	25486.8
0.70726	21593.8		0.70726	22155.6		0.70726	19824.8		0.70726	21594.3		0.70726	23558.6		0.70726	25455.9
0.710154	21628.5		0.710154	22181.6		0.710154	19819.5		0.710154	21583.6		0.710154	23539.3		0.710154	25427.9
0.713048	21663.2		0.713048	22207.7		0.713048	19815.1		0.713048	21573.7		0.713048	23521.7		0.713048	25401.9
0.715942	21696.9		0.715942	22232.6		0.715942	19810.9		0.715942	21564.5		0.715942	23505.3		0.715942	25377.7
0.715942	21696.9		0.715942	22232.6		0.715942	19810.9		0.715942	21564.5		0.715942	23505.3		0.715942	25377.7
0.718836	21730.1		0.718836	22257.2		0.718836	19806.6		0.718836	21555.6		0.718836	23489.4		0.718836	25354.8
0.72173	21761.3		0.72173	22279.6		0.72173	19801.9		0.72173	21546.1		0.72173	23473.9		0.72173	25331.8
0.724624	21790.9		0.724624	22300.8		0.724624	19795.9		0.724624	21536.1		0.724624	23457.6		0.724624	25309
0.727518	21816.8		0.727518	22318.1		0.727518	19788.7		0.727518	21524.1		0.727518	23440.6		0.727518	25284.5
0.730412	21840.6		0.730412	22333.3		0.730412	19778.8		0.730412	21510.7		0.730412	23421.1		0.730412	25258.5
0.733305	21860.4		0.733305	22344.8		0.733305	19766.9		0.733305	21493.8		0.733305	23399.6		0.733305	25228.4
0.736199	21876		0.736199	22351.7		0.736199	19751		0.736199	21474.4		0.736199	23373.7		0.736199	25195.1
0.739093	21886.5		0.739093	22353.5		0.739093	19732.1		0.739093	21450.2		0.739093	23344.4		0.739093	25155.9
0.741987	21891.4		0.741987	22349.8		0.741987	19708.2		0.741987	21422.4		0.741987	23308.6		0.741987	25111.8
0.744881	21890.3		0.744881	22340.3		0.744881	19681.1		0.744881	21388.3		0.744881	23268.8		0.744881	25059.4
0.747775	21883		0.747775	22324.8		0.747775	19648.3		0.747775	21350.6		0.747775	23222.2		0.747775	25001.6
0.750669	21869.3		0.750669	22303.6		0.750669	19611.4		0.750669	21307.3		0.750669	23169.4		0.750669	24936.1
0.753563	21850		0.753563	22276.5		0.753563	19570.6		0.753563	21258.5		0.753563	23111		0.753563	24862.4
0.756457	21825.1		0.756457	22244.7		0.756457	19525.8		0.756457	21206.1		0.756457	23046.7		0.756457	24783.2
0.75935	21795.7		0.75935	22208.1		0.75935	19478.6		0.75935	21150		0.75935	22978		0.75935	24698.2
0.762244	21762.6		0.762244	22167.9		0.762244	19429.8		0.762244	21091.6		0.762244	22905.9		0.762244	24609.4
0.765138	21727.3		0.765138	22126.5		0.765138	19380.8		0.765138	21032.2		0.765138	22831.6		0.765138	24518.3
0.768032	21691.7		0.768032	22084.5		0.768032	19332.9		0.768032	20973.1		0.768032	22756.6		0.768032	24426.9
0.770926	21657.7		0.770926	22044.5		0.770926	19287.1		0.770926	20915.8		0.770926	22682.8		0.770926	24337.8
0.77382	21629.3		0.77382	22009.3		0.77382	19245.6		0.77382	20862.6		0.77382	22613.1		0.77382	24254.3
0.776714	21607.2		0.776714	21980.4		0.776714	19208.9		0.776714	20814.4		0.776714	22549.1		0.776714	24178.7
0.779608	21593.9		0.779608	21959.6		0.779608	19181.5		0.779608	20774.7		0.779608	22494.3		0.779608	24114.8
0.782502	21596.7		0.782502	21953.8		0.782502	19168.3		0.782502	20750.5		0.782502	22456.2		0.782502	24068.9
0.785396	21623.8		0.785396	21971.9		0.785396	19171.7		0.785396	20744.8		0.785396	22439.7		0.785396	24047.3
0.788289	21679.1		0.788289	22017.7		0.788289	19197.8		0.788289	20763.4		0.788289	22451.3		0.788289	24057.2
0.791183	21767.2		0.791183	22096.5		0.791183	19251.5		0.791183	20812.7		0.791183	22498.3		0.791183	24104.3
0.794077	21891.2		0.794077	22212.4		0.794077	19335.2		0.794077	20895.7		0.794077	22584.2		0.794077	24193.2
0.796971	22050.3		0.796971	22365.1		0.796971	19449.6		0.796971	21013.3		0.796971	22709.9		0.796971	24324.8
0.799865	22242.7		0.799865	22552.9		0.799865	19594.1		0.799865	21165.3		0.799865	22875.1		0.799865	24498.5
0.799865	22242.7		0.799865	22552.9		0.799865	19594.1		0.799865	21165.3		0.799865	22875.1		0.799865	24498.5
0.802759	22464.5		0.802759	22772.4		0.802759	19766.2		0.802759	21349.1		0.802759	23076.7		0.802759	24711.3
0.805653	22710.8		0.805653	23018.8		0.805653	19962		0.805653	21560.9		0.805653	23310.1		0.805653	24958.4
0.808547	22975.2		0.808547	23285.5		0.808547	20176.8		0.808547	21795.3		0.808547	23569.4		0.808547	25233.7
0.811441	23248.7		0.811441	23563.4		0.811441	20403.8		0.811441	22044.8		0.811441	23845.7		0.811441	25527.7
0.814334	23521.7		0.814334	23842.8		0.814334	20634.7		0.814334	22300.1		0.814334	24128.2		0.814334	25828.7
0.817228	23783		0.817228	24111.8		0.817228	20860.2		0.817228	22550.5		0.817228	24404.2		0.817228	26122.9
0.820122	24021.9		0.820122	24359.5		0.820122	21070.8		0.820122	22783.9		0.820122	24662.4		0.820122	26397.9
0.823016	24232		0.823016	24578.7		0.823016	21261		0.823016	22993.8		0.823016	24891.8		0.823016	26642
0.82591	24408.9		0.82591	24764.6		0.82591	21424.5		0.82591	23173.7		0.82591	25089.3		0.82591	26851.3
0.828804	24557.7		0.828804	24922.1		0.828804	21565.2		0.828804	23326.4		0.828804	25250.4		0.828804	27021.6
0.831698	24697.4		0.831698	25068.1		0.831698	21697.5		0.831698	23467.7		0.831698	25397.1		0.831698	27176.2
0.834592	24895.1		0.834592	25265.7		0.834592	21867.5		0.834592	23647.7		0.834592	25590.1		0.834592	27378.9
0.837486	25243		0.837486	25614.6		0.837486	22158.4		0.837486	23959.2		0.837486	25921.2		0.837486	27731.2
0.840379	25771.2		0.840379	26157		0.840379	22612		0.840379	24448.7		0.840379	26450.9		0.840379	28303.3
0.843273	26448.6		0.843273	26862.6		0.843273	23207.9		0.843273	25095.6		0.843273	27157.6		0.843273	29073.6
0.846167	27227.8		0.846167	27683.5		0.846167	23911.8		0.846167	25860.4		0.846167	27997		0.846167	29993
0.849061	28066.3		0.849061	28580.5		0.849061	24698.1		0.849061	26707.7		0.849061	28925.1		0.849061	31009.2
0.851955	28959.4		0.851955	29549.4		0.851955	25576.7		0.851955	27648.6		0.851955	29949.4		0.851955	32124.6
0.854849	29828.2		0.854849	30495.6		0.854849	26462.1		0.854849	28605.8		0.854849	30999		0.854849	33269.1
0.857743	30547.1		0.857743	31283.6		0.857743	27225.5		0.857743	29437.3		0.857743	31920.3		0.857743	34278.2
0.860637	31122.3		0.860637	31921.1		0.860637	27874.8		0.860637	30138.9		0.860637	32693.6		0.860637	35121
0.863531	31929.3		0.863531	32778.3		0.863531	28694.6		0.863531	31027.5		0.863531	33670		0.863531	36177.4
0.866424	33470		0.866424	34403.3		0.866424	30144.8		0.866424	32611.8		0.866424	35416.2		0.866424	38072.7
0.869318	35551.3		0.869318	36634.9		0.869318	32137.6		0.869318	34791.5		0.869318	37822.4		0.869318	40694.9
0.872212	37515.4		0.872212	38779.8		0.872212	34103.4		0.872212	36938.7		0.872212	40192.8		0.872212	43282.6
0.875106	38876.6		0.875106	40307.9		0.875106	35560.6		0.875106	38525.1		0.875106	41943.4		0.875106	45195.1
0.878	39359.6		0.878	40864.7		0.878	36110.5		0.878	39121.4		0.878	42601.3		0.878	45914
